# Supplementary material for: Extensive cargo identification reveals distinct biological roles of the 12 importin pathways
Source: eLife. 2017 Jan 24;6:e21184. doi: 10.7554/eLife.21184 (PMC5305215; doi:10.7554/eLife.21184)
Supplement: Figure 1—source data 1. — (A, B) Reported cargo rates, recall, and p-values of the Trn-1 2nd-Z-percentile ranking. Reported cargoes and proteins that have not been reported as cargoes (unreported candidate cargoes) in the top 1% to 20% ranks were counted in 1% rank increments, and the reported cargo rates (a lower bound on precision), recall (sensitivity), and p-values were calculated using two definitions of negative examples: (i) assuming any protein not reported as a cargo is negative (A), or (ii) assuming only those annotated to have non-nuclear localization in Uniprot to be negative (B). p-values were calculated by Fisher's exact test. The row marked in cyan corresponds to the 2nd-Z-15% cargoes. (C, D) Reported cargo rates, recall, and p-values of the Trn-1 3rd-Z-percentile ranking. Reported cargo rates, recall, and p-values of the top 1% to 20% ranks were calculated similarly using two definitions of negative examples. The row marked in magenta corresponds to the 3rd-Z-4% cargoes. See also Figure 1—figure supplement 3. DOI: http://dx.doi.org/10.7554/eLife.21184.003 [file elife-21184-fig1-data1.xlsx]

## Sheet: Figure 1-source data file 1
Figure 1-source data file 1
Statistical analysis of reported cargoes in the Trn-1 2nd- and 3rd-Z-ranking
(A, B) Reported cargo rates, recall, and p-values of the Trn-1 2nd-Z-percentile ranking. Reported cargoes and proteins that have not been reported as cargoes (unreported candidate cargoes) in the top 1% to 20% ranks were counted in 1% rank increments, and the reported cargo rates (a lower bound on precision), recall (sensitivity), and p-values were calculated using two definitions of negative exa…
A Trn-1 2nd-Z-Ranking: 1649 proteins							B Trn-1 2nd-Z-Ranking: 1649 proteins
	Positive: 27 reported cargoes							Positive: 27 reported cargoes
	Negative: 1622 proteins not reported as cargoes							Negative: 259 non-nuclear proteins
% Rank by 2nd Z-score	# of Reported Cargoes	# of Unreported Cargo Candidates	Reported Cargo Rate	Recall (Sensitivity)	p-value		% Rank by 2nd Z-score	# of Reported Cargoes	# of Non- nuclear Proteins	Reported Cargo Rate	Recall (Sensitivity)	p-value
0.01	8	8	≥0.500	0.296296	1.97e-11		0.01	8	0	1.000	0.296296	2.21e-09
0.02	11	21	≥0.344	0.407407	2.34e-13		0.02	11	3	0.786	0.407407	1.86e-10
0.03	13	36	≥0.265	0.481481	3.86e-14		0.03	13	4	0.765	0.481481	3.76e-12
0.04	14	52	≥0.212	0.518519	8.79e-14		0.04	14	9	0.609	0.518519	5.32e-11
0.05	14	68	≥0.171	0.518519	2.4e-12		0.05	14	12	0.538	0.518519	5.45e-10
0.06	15	84	≥0.152	0.555556	1.59e-12		0.06	15	13	0.536	0.555556	7.06e-10
0.07	15	100	≥0.130	0.555556	1.58e-11		0.07	15	15	0.500	0.555556	3.81e-10
0.08	15	117	≥0.114	0.555556	1.25e-10		0.08	15	16	0.484	0.555556	7.06e-10
0.09	16	132	≥0.108	0.592593	4.49e-11		0.09	16	21	0.432	0.592593	1.15e-09
0.1	16	148	≥0.098	0.592593	2.26e-10		0.1	16	24	0.400	0.592593	4.94e-09
0.11	16	165	≥0.088	0.592593	1.05e-09		0.11	16	26	0.381	0.592593	1.2e-08
0.12	17	180	≥0.086	0.62963	3.08e-10		0.12	17	30	0.362	0.62963	7.53e-09
0.13	18	196	≥0.084	0.666667	9.05e-11		0.13	18	33	0.353	0.666667	2.85e-09
0.14	18	212	≥0.078	0.666667	3.18e-10		0.14	18	37	0.327	0.666667	1.27e-08
0.15	20	227	≥0.081	0.740741	5.39e-12		0.15	20	39	0.339	0.740741	3.07e-10
0.16	20	243	≥0.076	0.740741	1.84e-11		0.16	20	44	0.313	0.740741	1.86e-09
0.17	20	260	≥0.071	0.740741	6.22e-11		0.17	20	50	0.286	0.740741	1.28e-08
0.18	20	276	≥0.068	0.740741	1.82e-10		0.18	20	53	0.274	0.740741	3.09e-08
0.19	20	293	≥0.064	0.740741	5.3e-10		0.19	20	55	0.267	0.740741	5.42e-08
0.2	20	309	≥0.061	0.740741	1.37e-09		0.2	20	58	0.256	0.740741	1.22e-07
C Trn-1 3rd-Z-Ranking: 1235 proteins							D Trn-1 3rd-Z-Ranking: 1235 proteins
	Positive: 25 reported cargoes							Positive: 25 reported cargoes
	Negative: 1210 proteins not reported as cargoes							Negative: 178 non-nuclear proteins
% Rank by 3rd Z-score	# of Reported Cargoes	# of Unreported Cargo Candidates	Reported Cargo Rate	Recall (Sensitivity)	p-value		% Rank by 3rd Z-score	# of Reported Cargoes	# of Non- nuclear Proteins	Reported Cargo Rate	Recall (Sensitivity)	p-value
0.01	7	5	≥0.583	0.28	4.16e-10		0.01	7	0	1.000	0.28	1.89e-07
0.02	13	11	≥0.542	0.52	5.01e-18		0.02	13	0	1.000	0.52	4.82e-14
0.03	17	20	≥0.460	0.68	1.67e-22		0.03	17	1	0.944	0.68	7.84e-18
0.04	17	32	≥0.347	0.68	6.31e-20		0.04	17	3	0.850	0.68	4.57e-16
0.05	17	44	≥0.279	0.68	4.83e-18		0.05	17	4	0.810	0.68	2.3e-15
0.06	17	57	≥0.230	0.68	1.9e-16		0.06	17	8	0.680	0.68	3.5e-13
0.07	17	69	≥0.198	0.68	3.04e-15		0.07	17	8	0.680	0.68	3.5e-13
0.08	17	81	≥0.173	0.68	3.23e-14		0.08	17	10	0.630	0.68	2.5e-12
0.09	17	94	≥0.153	0.68	2.95e-13		0.09	17	11	0.607	0.68	6.1e-12
0.1	17	106	≥0.138	0.68	1.78e-12		0.1	17	15	0.531	0.68	1.35e-10
0.11	17	118	≥0.126	0.68	8.89e-12		0.11	17	18	0.486	0.68	9.44e-10
0.12	18	130	≥0.122	0.72	2.28e-12		0.12	18	21	0.462	0.72	5.42e-10
0.13	20	140	≥0.125	0.8	3.46e-13		0.13	20	22	0.476	0.8	6.69e-12
0.14	20	152	≥0.116	0.8	7.85e-14		0.14	20	23	0.465	0.8	1.22e-11
0.15	20	165	≥0.108	0.8	3.46e-13		0.15	20	26	0.435	0.8	6.48e-11
0.16	21	176	≥0.107	0.84	4.97e-14		0.16	21	29	0.420	0.84	2.28e-11
0.17	21	188	≥0.101	0.84	1.76e-13		0.17	21	30	0.412	0.84	3.78e-11
0.18	21	201	≥0.095	0.84	6.33e-13		0.18	21	33	0.389	0.84	1.59e-10
0.19	21	213	≥0.090	0.84	1.93e-12		0.19	21	34	0.382	0.84	2.51e-10
0.2	21	226	≥0.085	0.84	6e-12		0.2	21	36	0.368	0.84	6.04e-10
