# Supplementary material for: Extensive cargo identification reveals distinct biological roles of the 12 importin pathways
Source: eLife journal article supplement (doi:10.7554/elife.21184), 2017-01-24
Supplement: supp [file elife_poa_e21184_Supplementary_file_12.xlsx]

## Sheet: A. MS data files
Supprementary file 12
A. MS data files				B. GFP-fusion proteins used for in vitro transport and antibodies (Another sheet)	(2 sheets including this one)
The mass spectrometry proteomics data (.msf and .raw files) have been deposited to the ProteomeXchange Consortium (http://www.proteomexchange.org/) with the dataset identifier PXD004655. The results of protein and peptide identification and quantitation are summarized in Supplementary file 1, and the .msf and .raw data files corresponding to each experiment in Supplementary file 1 are listed in t…
NTR	Experiment #	Ctl or +NTR	.msf file	.raw file
Imp-β	Experiment-1	Ctl	MSF_setA_Ctl.msf	140815_QE_206_Kimura_01_AC_1.raw
				140815_QE_206_Kimura_02_AC_2.raw
				140815_QE_206_Kimura_03_AC_3.raw
				140815_QE_206_Kimura_04_AC_4.raw
		Imp-β	MSF_setA_+Imp-beta.msf	140815_QE_206_Kimura_09_A4_1.raw
				140815_QE_206_Kimura_10_A4_2.raw
				140815_QE_206_Kimura_11_A4_3.raw
				140815_QE_206_Kimura_12_A4_4.raw
	Experiment-2	Ctl	MSF_setB_+Ctl.msf	140819_QE_206_Kimura_13_BC_1.raw
				140819_QE_206_Kimura_14_BC_2.raw
				140819_QE_206_Kimura_15_BC_3.raw
				140819_QE_206_Kimura_16_BC_4.raw
		Imp-β	MSF_setB_+Imp-beta.msf	140819_QE_206_Kimura_21_B4_1.raw
				140819_QE_206_Kimura_22_B4_2.raw
				140819_QE_206_Kimura_23_B4_3.raw
				140819_QE_206_Kimura_24_B4_4.raw
	Experiment-3	Ctl	MSF_setC_Ctl.msf	140821_QE_206_Kimura_25_CC_1.raw
				140821_QE_206_Kimura_26_CC_2.raw
				140821_QE_206_Kimura_27_CC_3.raw
				140821_QE_206_Kimura_28_CC_4.raw
		Imp-β	MSF_setC_+Imp-beta.msf	140821_QE_206_Kimura_33_C4_1.raw
				140821_QE_206_Kimura_34_C4_2.raw
				140821_QE_206_Kimura_35_C4_3.raw
				140821_QE_206_Kimura_36_C4_4.raw
Trn-1	Experiment-1	Ctl	MSF_setN_Ctl.msf	150313_QE_456_Kimura_49_NC_1.raw
				150313_QE_456_Kimura_50_NC_2.raw
				150313_QE_456_Kimura_51_NC_3.raw
				150313_QE_456_Kimura_52_NC_4.raw
		Trn-1	MSF_setN_+Trn-1.msf	150313_QE_456_Kimura_53_NT1_1.raw
				150313_QE_456_Kimura_54_NT1_2.raw
				150313_QE_456_Kimura_55_NT1_3.raw
				150313_QE_456_Kimura_56_NT1_4.raw
	Experiment-2	Ctl	MSF_setO_Ctl.msf	150320_QE_456_Kimura_61_OC_1.raw
				150320_QE_456_Kimura_62_OC_2.raw
				150320_QE_456_Kimura_63_OC_3.raw
				150320_QE_456_Kimura_64_OC_4.raw
		Trn-1	MSF_setO_+Trn-1.msf	150320_QE_456_Kimura_65_OT1_1.raw
				150320_QE_456_Kimura_66_OT1_2.raw
				150320_QE_456_Kimura_67_OT1_3.raw
				150320_QE_456_Kimura_68_OT1_4.raw
	Experiment-3	Ctl	MSF_setS_Ctl.msf	150403_QE_456_Kimura_097_SC_1.raw
				150403_QE_456_Kimura_098_SC_2.raw
				150403_QE_456_Kimura_099_SC_3.raw
				150403_QE_456_Kimura_100_SC_4.raw
		Trn-1	MSF_setS_+Trn-1.msf	150403_QE_456_Kimura_101_ST1_1.raw
				150403_QE_456_Kimura_102_ST1_2.raw
				150403_QE_456_Kimura_103_ST1_3.raw
				150403_QE_456_Kimura_104_ST1_4.raw
Trn-2	Experiment-1	Ctl	MSF_setN_Ctl.msf	150313_QE_456_Kimura_49_NC_1.raw
				150313_QE_456_Kimura_50_NC_2.raw
				150313_QE_456_Kimura_51_NC_3.raw
				150313_QE_456_Kimura_52_NC_4.raw
		Trn-2	MSF_setN_+Trn-2.msf	150313_QE_456_Kimura_57_NT2_1.raw
				150313_QE_456_Kimura_58_NT2_2.raw
				150313_QE_456_Kimura_59_NT2_3.raw
				150313_QE_456_Kimura_60_NT2_4.raw
	Experiment-2	Ctl	MSF_setO_Ctl.msf	150320_QE_456_Kimura_61_OC_1.raw
				150320_QE_456_Kimura_62_OC_2.raw
				150320_QE_456_Kimura_63_OC_3.raw
				150320_QE_456_Kimura_64_OC_4.raw
		Trn-2	MSF_setO_+Trn-2.msf	150320_QE_456_Kimura_69_OT2_1.raw
				150320_QE_456_Kimura_70_OT2_2.raw
				150320_QE_456_Kimura_71_OT2_3.raw
				150320_QE_456_Kimura_72_OT2_4.raw
	Experiment-3	Ctl	MSF_setS_Ctl.msf	150403_QE_456_Kimura_097_SC_1.raw
				150403_QE_456_Kimura_098_SC_2.raw
				150403_QE_456_Kimura_099_SC_3.raw
				150403_QE_456_Kimura_100_SC_4.raw
		Trn-2	MSF_setS_+Trn-2.msf	150403_QE_456_Kimura_105_ST2_1.raw
				150403_QE_456_Kimura_106_ST2_2.raw
				150403_QE_456_Kimura_107_ST2_3.raw
				150403_QE_456_Kimura_108_ST2_4.raw
Trn-SR	Experiment-1	Ctl	MSF_setG_Ctl.msf	141002_QE_247_Kimura_37_GC_1.raw
				141002_QE_247_Kimura_38_GC_2.raw
				141002_QE_247_Kimura_39_GC_3.raw
				141002_QE_247_Kimura_40_GC_4.raw
		Trn-SR	MSF_setG_+Trn-SR.msf	141002_QE_247_Kimura_41_GSR_1.raw
				141002_QE_247_Kimura_42_GSR_2.raw
				141002_QE_247_Kimura_43_GSR_3.raw
				141002_QE_247_Kimura_44_GSR_4.raw
	Experiment-2	Ctl	MSF_setH_Ctl.msf	141003_QE_247_Kimura_49_HC_1.raw
				141003_QE_247_Kimura_50_HC_2.raw
				141003_QE_247_Kimura_51_HC_3.raw
				141003_QE_247_Kimura_52_HC_4.raw
		Trn-SR	MSF_setH_+Trn-SR.msf	141003_QE_247_Kimura_53_HSR_1.raw
				141003_QE_247_Kimura_54_HSR_2.raw
				141003_QE_247_Kimura_55_HSR_3.raw
				141003_QE_247_Kimura_56_HSR_4.raw
	Experiment-3	Ctl	MSF_setI_Ctl.msf	141006_QE_247_Kimura_61_IC_1.raw
				141006_QE_247_Kimura_62_IC_2.raw
				141006_QE_247_Kimura_63_IC_3.raw
				141006_QE_247_Kimura_64_IC_4.raw
		Trn-SR	MSF_setI_+Trn-SR.msf	141006_QE_247_Kimura_65_ISR_1.raw
				141006_QE_247_Kimura_66_ISR_2.raw
				141006_QE_247_Kimura_67_ISR_3.raw
				141006_QE_247_Kimura_68_ISR_4.raw
Imp-4	Experiment-1	Ctl	MSF_setT_Ctl.msf	160215_QE_413_Kimura_01_TC_1.raw
				160215_QE_413_Kimura_02_TC_2.raw
				160215_QE_413_Kimura_03_TC_3.raw
				160215_QE_413_Kimura_04_TC_4.raw
		Imp-4	MSF_setT_+Imp-4.msf	160215_QE_413_Kimura_05_T4_1.raw
				160215_QE_413_Kimura_06_T4_2.raw
				160215_QE_413_Kimura_07_T4_3.raw
				160215_QE_413_Kimura_08_T4_4.raw
	Experiment-2	Ctl	MSF_setU_Ctl.msf	160219_QE_413_Kimura_09_UC_1.raw
				160219_QE_413_Kimura_10_UC_2.raw
				160219_QE_413_Kimura_11_UC_3.raw
				160219_QE_413_Kimura_12_UC_4.raw
		Imp-4	MSF_setU_+Imp-4.msf	160219_QE_413_Kimura_13_U4_1.raw
				160219_QE_413_Kimura_14_U4_2.raw
				160219_QE_413_Kimura_15_U4_3.raw
				160219_QE_413_Kimura_16_U4_4.raw
	Experiment-3	Ctl	MSF_setV_Ctl.msf	160223_QE_413_Kimura_17_VC_1.raw
				160223_QE_413_Kimura_18_VC_2.raw
				160223_QE_413_Kimura_19_VC_3.raw
				160223_QE_413_Kimura_20_VC_4.raw
		Imp-4	MSF_setV_+Imp-4.msf	160223_QE_413_Kimura_21_V4_1.raw
				160223_QE_413_Kimura_22_V4_2.raw
				160223_QE_413_Kimura_23_V4_3.raw
				160223_QE_413_Kimura_24_V4_4.raw
Imp-5	Experiment-1	Ctl	MSF_setG_Ctl.msf	141002_QE_247_Kimura_37_GC_1.raw
				141002_QE_247_Kimura_38_GC_2.raw
				141002_QE_247_Kimura_39_GC_3.raw
				141002_QE_247_Kimura_40_GC_4.raw
		Imp-5	MSF_setG_+Imp-5.msf	141002_QE_247_Kimura_45_G5_1.raw
				141002_QE_247_Kimura_46_G5_2.raw
				141002_QE_247_Kimura_47_G5_3.raw
				141002_QE_247_Kimura_48_G5_4.raw
	Experiment-2	Ctl	MSF_setH_Ctl.msf	141003_QE_247_Kimura_49_HC_1.raw
				141003_QE_247_Kimura_50_HC_2.raw
				141003_QE_247_Kimura_51_HC_3.raw
				141003_QE_247_Kimura_52_HC_4.raw
		Imp-5	MSF_setH_+Imp-5.msf	141003_QE_247_Kimura_57_H5_1.raw
				141003_QE_247_Kimura_58_H5_2.raw
				141003_QE_247_Kimura_59_H5_3.raw
				141003_QE_247_Kimura_60_H5_4.raw
	Experiment-3	Ctl	MSF_setI_Ctl.msf	141006_QE_247_Kimura_61_IC_1.raw
				141006_QE_247_Kimura_62_IC_2.raw
				141006_QE_247_Kimura_63_IC_3.raw
				141006_QE_247_Kimura_64_IC_4.raw
		Imp-5	MSF_setI_+Imp-5.msf	141006_QE_247_Kimura_69_I5_1.raw
				141006_QE_247_Kimura_70_I5_2.raw
				141006_QE_247_Kimura_71_I5_3.raw
				141006_QE_247_Kimura_72_I5_4.raw
Imp-7	Experiment-1	Ctl	MSF_setD_Ctl.msf	140912_QE_247_Kimura_01_DC_1.raw
				140912_QE_247_Kimura_02_DC_2.raw
				140912_QE_247_Kimura_03_DC_3.raw
				140912_QE_247_Kimura_04_DC_4.raw
		Imp-7	MSF_setD_+Imp-7.msf	140912_QE_247_Kimura_05_D7_1.raw
				140912_QE_247_Kimura_06_D7_2.raw
				140912_QE_247_Kimura_07_D7_3.raw
				140912_QE_247_Kimura_08_D7_4.raw
	Experiment-2	Ctl	MSF_setE_Ctl.msf	140920_QE_247_Kimura_13_EC_1.raw
				140920_QE_247_Kimura_14_EC_2.raw
				140920_QE_247_Kimura_15_EC_3.raw
				140920_QE_247_Kimura_16_EC_4.raw
		Imp-7	MSF_setE_+Imp-7.msf	140920_QE_247_Kimura_17_E7_1.raw
				140920_QE_247_Kimura_18_E7_2.raw
				140920_QE_247_Kimura_19_E7_3.raw
				140920_QE_247_Kimura_20_E7_4.raw
	Experiment-3	Ctl	MSF_setF_Ctl.msf	140926_QE_247_Kimura_25_FC_1.raw
				140926_QE_247_Kimura_26_FC_2.raw
				140926_QE_247_Kimura_27_FC_3.raw
				140926_QE_247_Kimura_28_FC_4.raw
		Imp-7	MSF_setF_+Imp-7.msf	140926_QE_247_Kimura_29_F7_1.raw
				140926_QE_247_Kimura_30_F7_2.raw
				140926_QE_247_Kimura_31_F7_3.raw
				140926_QE_247_Kimura_32_F7_4.raw
Imp-8	Experiment-1	Ctl	MSF_setD_Ctl.msf	140912_QE_247_Kimura_01_DC_1.raw
				140912_QE_247_Kimura_02_DC_2.raw
				140912_QE_247_Kimura_03_DC_3.raw
				140912_QE_247_Kimura_04_DC_4.raw
		Imp-8	MSF_setD_+Imp-8.msf	140912_QE_247_Kimura_09_D8_1.raw
				140912_QE_247_Kimura_10_D8_2.raw
				140912_QE_247_Kimura_11_D8_3.raw
				140912_QE_247_Kimura_12_D8_4.raw
	Experiment-2	Ctl	MSF_setE_Ctl.msf	140920_QE_247_Kimura_13_EC_1.raw
				140920_QE_247_Kimura_14_EC_2.raw
				140920_QE_247_Kimura_15_EC_3.raw
				140920_QE_247_Kimura_16_EC_4.raw
		Imp-8	MSF_setE_+Imp-8.msf	140920_QE_247_Kimura_21_E8_1.raw
				140920_QE_247_Kimura_22_E8_2.raw
				140920_QE_247_Kimura_23_E8_3.raw
				140920_QE_247_Kimura_24_E8_4.raw
	Experiment-3	Ctl	MSF_setF_Ctl.msf	140926_QE_247_Kimura_25_FC_1.raw
				140926_QE_247_Kimura_26_FC_2.raw
				140926_QE_247_Kimura_27_FC_3.raw
				140926_QE_247_Kimura_28_FC_4.raw
		Imp-8	MSF_setF_+Imp-8.msf	140926_QE_247_Kimura_33_F8_1.raw
				140926_QE_247_Kimura_34_F8_2.raw
				140926_QE_247_Kimura_35_F8_3.raw
				140926_QE_247_Kimura_36_F8_4.raw
Imp-9	Experiment-1	Ctl	MSF_setJ_Ctl.msf	150213_QE_456_Kimura_01_JC_1.raw
				150213_QE_456_Kimura_02_JC_2.raw
				150213_QE_456_Kimura_03_JC_3.raw
				150213_QE_456_Kimura_04_JC_4.raw
		Imp-9	MSF_setJ_+Imp-9.msf	150213_QE_456_Kimura_09_J9_1.raw
				150213_QE_456_Kimura_10_J9_2.raw
				150213_QE_456_Kimura_11_J9_3.raw
				150213_QE_456_Kimura_12_J9_4.raw
	Experiment-2	Ctl	MSF_setK_Ctl.msf	150220_QE_456_Kimura_13_KC_1.raw
				150220_QE_456_Kimura_14_KC_2.raw
				150220_QE_456_Kimura_15_KC_3.raw
				150220_QE_456_Kimura_16_KC_4.raw
		Imp-9	MSF_setK_+Imp-9.msf	150220_QE_456_Kimura_21_K9_1.raw
				150220_QE_456_Kimura_22_K9_2.raw
				150220_QE_456_Kimura_23_K9_3.raw
				150220_QE_456_Kimura_24_K9_4.raw
	Experiment-3	Ctl	MSF_setL_Ctl.msf	150227_QE_456_Kimura_25_LC_1.raw
				150227_QE_456_Kimura_26_LC_2.raw
				150227_QE_456_Kimura_27_LC_3.raw
				150227_QE_456_Kimura_28_LC_4.raw
		Imp-9	MSF_setL_+Imp-9.msf	150227_QE_456_Kimura_33_L9_1.raw
				150227_QE_456_Kimura_34_L9_2.raw
				150227_QE_456_Kimura_35_L9_3.raw
				150227_QE_456_Kimura_36_L9_4.raw
Imp-11	Experiment-1	Ctl	MSF_setJ_Ctl.msf	150213_QE_456_Kimura_01_JC_1.raw
				150213_QE_456_Kimura_02_JC_2.raw
				150213_QE_456_Kimura_03_JC_3.raw
				150213_QE_456_Kimura_04_JC_4.raw
		Imp-11	MSF_setJ_+Imp-11.msf	150213_QE_456_Kimura_05_J11_1.raw
				150213_QE_456_Kimura_06_J11_2.raw
				150213_QE_456_Kimura_07_J11_3.raw
				150213_QE_456_Kimura_08_J11_4.raw
	Experiment-2	Ctl	MSF_setK_Ctl.msf	150220_QE_456_Kimura_13_KC_1.raw
				150220_QE_456_Kimura_14_KC_2.raw
				150220_QE_456_Kimura_15_KC_3.raw
				150220_QE_456_Kimura_16_KC_4.raw
		Imp-11	MSF_setK_+Imp-11.msf	150220_QE_456_Kimura_17_K11_1.raw
				150220_QE_456_Kimura_18_K11_2.raw
				150220_QE_456_Kimura_19_K11_3.raw
				150220_QE_456_Kimura_20_K11_4.raw
	Experiment-3	Ctl	MSF_setL_Ctl.msf	150227_QE_456_Kimura_25_LC_1.raw
				150227_QE_456_Kimura_26_LC_2.raw
				150227_QE_456_Kimura_27_LC_3.raw
				150227_QE_456_Kimura_28_LC_4.raw
		Imp-11	MSF_setL_+Imp-11.msf	150227_QE_456_Kimura_29_L11_1.raw
				150227_QE_456_Kimura_30_L11_2.raw
				150227_QE_456_Kimura_31_L11_3.raw
				150227_QE_456_Kimura_32_L11_4.raw
Imp-13	Experiment-1	Ctl	MSF_setA_Ctl.msf	140815_QE_206_Kimura_01_AC_1.raw
				140815_QE_206_Kimura_02_AC_2.raw
				140815_QE_206_Kimura_03_AC_3.raw
				140815_QE_206_Kimura_04_AC_4.raw
		Imp-13	MSF_setA_+Imp-13.msf	140815_QE_206_Kimura_05_A13_1.raw
				140815_QE_206_Kimura_06_A13_2.raw
				140815_QE_206_Kimura_07_A13_3.raw
				140815_QE_206_Kimura_08_A13_4.raw
	Experiment-2	Ctl	MSF_setB_+Ctl.msf	140819_QE_206_Kimura_13_BC_1.raw
				140819_QE_206_Kimura_14_BC_2.raw
				140819_QE_206_Kimura_15_BC_3.raw
				140819_QE_206_Kimura_16_BC_4.raw
		Imp-13	MSF_setB_Imp-13.msf	140819_QE_206_Kimura_17_B13_1.raw
				140819_QE_206_Kimura_18_B13_2.raw
				140819_QE_206_Kimura_19_B13_3.raw
				140819_QE_206_Kimura_20_B13_4.raw
	Experiment-3	Ctl	MSF_setC_Ctl.msf	140821_QE_206_Kimura_25_CC_1.raw
				140821_QE_206_Kimura_26_CC_2.raw
				140821_QE_206_Kimura_27_CC_3.raw
				140821_QE_206_Kimura_28_CC_4.raw
		Imp-13	MSF_setC_+Imp-13.msf	140821_QE_206_Kimura_29_C13_1.raw
				140821_QE_206_Kimura_30_C13_2.raw
				140821_QE_206_Kimura_31_C13_3.raw
				140821_QE_206_Kimura_32_C13_4.raw
Exp-4	Experiment-1	Ctl	MSF_setP_Ctl.msf	150410_QE_001_Kimura_73_PC_1.raw
				150410_QE_001_Kimura_74_PC_2.raw
				150410_QE_001_Kimura_75_PC_3.raw
				150410_QE_001_Kimura_76_PC_4.raw
		Exp-4	MSF_setP_+Exp-4.msf	150410_QE_001_Kimura_77_PE4_1.raw
				150410_QE_001_Kimura_78_PE4_2.raw
				150410_QE_001_Kimura_79_PE4_3.raw
				150410_QE_001_Kimura_80_PE4_4.raw
	Experiment-2	Ctl	MSF_setQ_Ctl.msf	150417_QE_001_Kimura_81_QC_1.raw
				150417_QE_001_Kimura_82_QC_2.raw
				150417_QE_001_Kimura_83_QC_3.raw
				150417_QE_001_Kimura_84_QC_4.raw
		Exp-4	MSF_setQ_+Exp-4.msf	150417_QE_001_Kimura_85_QE4_1.raw
				150417_QE_001_Kimura_86_QE4_2.raw
				150417_QE_001_Kimura_87_QE4_3.raw
				150417_QE_001_Kimura_88_QE4_4.raw
	Experiment-3	Ctl	MSF_setR_Ctl.msf	150422_QE_001_Kimura_89_RC_1.raw
				150422_QE_001_Kimura_90_RC_2.raw
				150422_QE_001_Kimura_91_RC_3.raw
				150422_QE_001_Kimura_92_RC_4.raw
		Exp-4	MSF_setR_+Exp-4.msf	150422_QE_001_Kimura_93_RE4_1.raw
				150422_QE_001_Kimura_94_RE4_2.raw
				150422_QE_001_Kimura_95_RE4_3.raw
				150422_QE_001_Kimura_96_RE4_4.raw

## Sheet: B. Proteins and Antibodies
Supprementary file 12
B. GFP-fusion proteins used for in vitro transport and antibodies					A. MS data files (Another sheet)	(2 sheets including this one)
GFP-fusion proteins used for in vitro transport
Gene Name	UniProt	NCBI Protein	Reference
ELAVL1	Q15717	NP_001410.2	(Guttinger et al., 2004)
HHEX	Q03014	NP_002720.1	(Ploski et al., 2009)
PPP2R1A	P30153	NP_055040.2	(Lubert and Sarge, 2003)
RBM4	Q9BWF3	NP_002887.2	(Lai et al., 2003)
RPL12	P30050	NP_000967.1	(Plafker and Macara, 2002)
RPL23A	P62750	NP_000975.2	(Jakel and Gorlich, 1998)
RPS3A	P61247	NP_000997.1	(Jakel et al., 2002)
SNRPA1	P09661	NP_003081.2	(Kimura et al., 2013; Lee et al., 2006)
SOX2	P48431	NP_003097.1	(Gontan et al., 2009)
SRP19	P09132	NP_003126.1	(Dean et al., 2001)
UBE2I	P63279	NP_003336.1	(Mingot et al., 2001)
Antibodies
Target	Product Number		RRID
Imp-β	sc-11367	(Santa Cruz)	AB_2265549
Trn-1	sc-6914	(Santa Cruz)	AB_675694
Imp-5	sc-11369	(Santa Cruz)	AB_2264985
Imp-11	sc-130662	(Santa Cruz)	AB_2127668
Exp-4	sc-13422	(Santa Cruz)	AB_2215477
Trn-SR	ab109386	(Abcam)	AB_10861476
Imp-4	ab31250	(Abcam)	AB_2127678
Imp-7	ab15840	(Abcam)	AB_302077
Imp-9	ab52605	(Abcam)	AB_882276
Imp-13	ab21693	(Abcam)	AB_2041906
GFP	11814460001	(Roche)	AB_390913
