# Supplementary material for: Extensive cargo identification reveals distinct biological roles of the 12 importin pathways
Source: eLife. 2017 Jan 24;6:e21184. doi: 10.7554/eLife.21184 (PMC5305215; doi:10.7554/eLife.21184)
Supplement: Supplementary file 3. — The 2nd-Z-15% cargoes of each NTR are listed by the gene names in the 2nd-Z-rank orders. The ranks by the third Z-scores are also shown. Cyan in the rank columns indicates the 2nd-Z-15% and 3rd-Z-4% cargoes. Colors in the gene name columns: magenta, reported cargoes; blue, cargoes bound directly to the NTR in the bead halo assays (Supplementary file 2); light blue, cargoes bound directly to Imp-α but not Imp-β; gray, proteins that did not bind to the NTRs; yellow, Imp-α; and green, reported export cargoes. For the 3rd-Z-4% cargoes, see Figure 3. DOI: http://dx.doi.org/10.7554/eLife.21184.019 [file elife-21184-supp3.xlsx]

## Sheet: 2nd-Z-15% cargoes
Supplementary file 3
The 2nd-Z-15% cargoes of the 12 NTRs
The 2nd-Z-15% cargoes of each NTR are listed by the gene names in the 2nd-Z-rank orders. The ranks by the 3rd Z-scores are also shown. Cyan in the rank columns indicates the 2nd-Z-15% and 3rd-Z-4% cargoes. Colors in the gene name columns: magenta, reported cargoes; blue, cargoes bound directly to the NTR in the bead halo assays (Supplementary file 2); light blue, cargoes bound directly to Imp-α b…
Imp-β				Trn-1				Trn-2				Trn-SR				Imp-4				Imp-5				Imp-7				Imp-8				Imp-9				Imp-11				Imp-13				Exp-4
Z-score Rank		Gene Name		Z-score Rank		Gene Name		Z-score Rank		Gene Name		Z-score Rank		Gene Name		Z-score Rank		Gene Name		Z-score Rank		Gene Name		Z-score Rank		Gene Name		Z-score Rank		Gene Name		Z-score Rank		Gene Name		Z-score Rank		Gene Name		Z-score Rank		Gene Name		Z-score Rank		Gene Name
2nd	3rd			2nd	3rd			2nd	3rd			2nd	3rd			2nd	3rd			2nd	3rd			2nd	3rd			2nd	3rd			2nd	3rd			2nd	3rd			2nd	3rd			2nd	3rd
1	1	KPNB1		1	1	ATF1		1	1	ATF1		1	1386	PMPCA		1	360	UBTF		1	1	IPO5		1	447	SRPRB		1		AP2B1		1	2	ACAT1		1	1018	FUBP1		1	1	NFYB		1	743	EML4
2	2	RNMT		2	2	KHDRBS1		2	1257	TUBB3		2		TNPO3		2	1	IPO4		2	1546	CLTC		2	1	TRAP1		2		GNL2		2		SAFB		2		MRPL12		2		KDM2A		2	361	TUBB3
3	3	FAM103A1		3	3	MRTO4		3		CARS2		3	1	SRRM2		3	4	TFRC		3	1487	MRRF		3		DSG2		3	5	RALY		3	1	H2AFZ		3	41	JUP		3	939	S100P		3	1	DDX39B
4	4	KIFC1		4	4	HNRNPM		4	3	KHDRBS1		4	8	AIP		4		CSTF1		4	1560	IPO4		4	1445	CKM		4	1	ZNF787		4	5	FUBP1		4		POGZ		4	409	PRPSAP1		4	2	DDX39A
5	5	TSR1		5	891	TUBB3		5	4	HNRNPM		5	522	ERC1		5	652	XRN2		5	1293	TRAP1		5	169	NUP85		5	189	MYBBP1A		5	6	RBMX		5	122	RBMX		5	2	LRRC59		5		SLC25A11
6		PBRM1		6	7	HNRNPAB		6	1229	TFAM		6	1561	DCTN4		6	1091	PELP1		6	7	THOC1		6		KIAA1143		6	2	TFRC		6		NFYA		6	1221	SRRM1		6	3	GTF2A2		6		ALPI
7		EGFR		7	6	HNRNPA1		7	6	HNRNPA1		7	2	TRAP1		7		S100P		7		TMED10		7		CCDC47		7	10	HIST1H4A		7	11	PRPF6		7	795	HNRNPA0		7	26	UGGT1		7	11	SLTM
8	156	GLUD1		8	10	HNRNPD		8	12	HNRNPD		8	11	SRSF2		8	2	PFKL		8	1486	EEF1A2		8	1452	LRPPRC		8	699	ACAA2		8	306	MRPL12		8		NUP205		8	4	MAGOH		8	6	TMPO
9		MLF2		9	5	BYSL		9	5	MRTO4		9	54	THOC1		9		YARS2		9	1253	GAGE7		9	2	ZNF787		9		ACAT1		9	13	HNRNPUL1		9	1	RALY		9	5	RBM8A		9	3	JUP
10		H1F0		10	8	ALYREF		10	2	ETFA		10	3	PHF6		10	3	BMS1		10	956	PDHA1		10	82	POLR1B		10	26	SHMT2		10	72	IDH3B		10	1279	MYBBP1A		10	10	NOC2L		10		ACO2
11	1552	POLR1E		11	11	HNRNPA0		11		PHB		11		PRPF38B		11		ERC1		11	2	NFYA		11	1234	ALDH18A1		11	223	SEC11A		11		IPO9		11	6	ACO2		11		DHRS4		11		GNL2
12	413	RPN1		12		QKI		12	10	HNRNPAB		12		KIF2C		12	17	PICALM		12	35	SNX12		12		NUP205		12	4	NOP56		12	14	SUPT16H		12	2	TFRC		12	8	DDX27		12		ATP5A1
13	94	ATP5B		13	9	HNRNPA3		13	8	HNRNPA0		13	1549	ALDH18A1		13	20	BCLAF1		13	1279	STOM		13	1176	CKAP4		13	625	ATP5A1		13	3	CYR61		13	1303	SLTM		13	285	CD3EAP		13	14	NOP56
14	114	HADHA		14	13	HEXIM1		14	7	HNRNPA3		14	21	PAF1		14	316	TUFM		14		MUC16		14	174	HSPA9		14	411	ALDH18A1		14	1004	TOP2A		14	278	HSD17B10		14	777	UAP1		14		MSTO1
15	1313	ATF7		15	1060	NUP205		15	1264	PITRM1		15		ATP5E		15		NUP153		15	1517	HADHA		15		YY1		15		UGGT1		15	87	THEM6		15		DNAJB11		15	1307	GALE		15		ECH1
16	1503	NTMT1		16	15	HNRNPA2B1		16	9	ALYREF		16	4	SRSF6		16	1270	SON		16	78	EHBP1L1		16	10	VIM		16	1492	PITRM1		16	4	RALY		16	958	DDX17		16	1198	TPM2		16		HSD17B10
17		NADKD1		17	845	SLIRP		17	27	UTP18		17		ATAD2		17	9	RBMX		17	3	DDX56		17		UGGT1		17	3	HSPD1		17	282	NONO		17	1241	THEM6		17		SHCBP1		17	72	GLUD1
18	1539	LONP1		18		GOLGA2		18		DDX56		18		SCAF8		18	5	MFAP1		18		ECHS1		18		CARS2		18		LONP1		18	10	CS		18		MTPN		18	37	PHF10		18		RPRD2
19	7	NCBP2		19	14	EWSR1		19	15	HNRNPA2B1		19	5	SRSF8		19	12	SLTM		19		KIF11		19	299	ATP5A1		19	16	DDX21		19	100	HSPD1		19		ATP5B		19	6	CHRAC1		19	192	ARHGAP17
20	6	LRRC59		20		NFYA		20		QKI		20	15	ACOT9		20	839	TK1		20	588	FKBP10		20		MRPL51		20	36	VIM		20	709	LONP1		20		NFS1		20	1173	DIDO1		20	89	GOT2
21	10	NUP214		21	12	PABPN1		21	310	ALDH18A1		21	6	PLK1		21		ARGLU1		21		RRM2		21	71	PRDX3		21	19	NFYA		21	61	NOP58		21	860	ETF1		21	78	OGDH		21	141	KHSRP
22	14	HELLS		22		IVD		22	11	PABPN1		22	7	GOLIM4		22	915	UTP14A		22	25	NADKD1		22	52	NNT		22	509	MYOF		22		ATP5B		22		PPME1		22	680	DDX23		22		TIMM8A
23	20	MYOF		23		TIMM13		23	13	EWSR1		23	1578	ITPR1		23		FLYWCH2		23	1235	HDLBP		23	4	HMGB2		23		CRYZL1		23	30	DDX17		23	65	ARPC4		23	7	POLE3		23	4	VIM
24		DDX55		24	22	PDLIM1		24		OXA1L		24		KIF15		24	49	AKAP8		24	1497	EDF1		24	814	JUP		24	261	SFPQ		24	181	FGF2		24	4	EIF4A3		24	28	CAPN1		24	7	HSPD1
25	8	NCBP1		25		PBK		25	1144	PDHB		25		SDHA		25	6	ALPP		25		RALY		25	3	ERP44		25	13	NNT		25	20	DHX30		25	15	IL18		25		ARHGEF7		25	5	XRN2
26	35	OGDH		26	1156	S100A6		26	1259	ANKFY1		26	9	SRSF7		26	125	NSRP1		26	5	TP53I3		26	39	HSPD1		26	1393	SRPRB		26	1095	ETFA		26	39	MYL12A		26		AGPS		26	880	LRRFIP1
27	9	ALKBH5		27	1207	EEF1A2		27		RPN2		27	42	CCNB1		27		UTP18		27	6	BOP1		27	1151	NUP214		27		ACOT9		27		CD97		27	581	DYNC1LI2		27	154	ENAH		27		CHMP5
28	1486	TRMT10C		28	43	NOP56		28	26	PRPF6		28	1263	HADHA		28	180	VIM		28		ACO2		28		LONP1		28	9	GOT2		28	1199	MYL12A		28		PPP1R8		28	295	UNC45A		28	113	CLTC
29	54	KHSRP		29	1007	CBX5		29	19	HEXIM1		29	14	ZC3H4		29		SLC27A2		29	939	CTR9		29	7	ZNF207		29	33	CCAR1		29		HBA1		29	342	PML		29		PDHA1		29		RNPS1
30	12	NUP88		30		CARHSP1		30	22	NOP56		30		TARS2		30	341	VAPA		30		ARL6IP5		30		MYBBP1A		30	71	BOP1		30	28	JUP		30		TOP1		30	1310	PDCD11		30		IDH3G
31		NFYA		31	16	PQBP1		31	20	PQBP1		31		MLF2		31	10	SFPQ		31	1564	COTL1		31		HEATR1		31	1230	PLOD3		31	12	HSPA9		31	1290	HPDL		31	1577	AKAP13		31	9	CS
32	1571	UBR4		32	1209	CPNE1		32		IGBP1		32	1048	XRN2		32	7	FKBP10		32	1416	ACOT9		32		FIP1L1		32		ZNF691		32	359	LRPPRC		32	193	PRPF40A		32		FDFT1		32	1138	RBM14
33	21	MTA1		33	1182	AARS		33	427	HIST1H4A		33	10	CNOT10		33	202	MDH2		33	1470	MYBBP1A		33	1173	UQCRC2		33	886	CYB5R1		33	85	TUFM		33		BCAP31		33	9	NFYA		33		PAF1
34	357	OXCT1		34	25	HNRNPH1		34	14	DECR1		34	284	PGRMC1		34	1055	ETFA		34	1474	WIBG		34	61	MKI67IP		34	6	MAZ		34		LEPRE1		34	3	AKR1C1		34	12	SRSF8		34	12	TOMM70A
35	13	GTF2F1		35		SSBP1		35		FLYWCH2		35		TTC9C		35	1145	DYNLRB1		35	1539	NMT1		35	131	CECR5		35		SOD2		35		RBM14		35	421	ACTR1A		35	1525	IPO4		35	8	ALDH1B1
36		UQCRC1		36	1141	DDT		36		TBRG4		36		DDX27		36	92	DDX23		36		APPL1		36		HADH		36	11	SLC25A1		36	1239	ADNP		36	7	ALDH18A1		36	1447	MCCC2		36		TBRG4
37	11	SRRT		37	1208	COTL1		37	21	ELAVL1		37	29	CBX1		37	45	EIF1AX		37		OGDH		37	5	HIST1H4A		37		NOP16		37	201	SLIRP		37		CKS2		37	1543	SLC9A3R1		37		CYB5R3
38		GNL3L		38	1115	MT2A		38	1248	HSPD1		38	12	ZNF281		38	824	ZNF638		38	415	UTP18		38		RBM12B		38		DSG2		38	1103	XRN2		38	1189	TRIP13		38		UBE2O		38		IDH3A
39	1342	PRPSAP1		39		AKR1C1		39	1068	CKM		39	213	WBP11		39	545	HP1BP3		39	1157	DBN1		39	19	SHMT2		39	42	U2SURP		39		TOP1		39		RRS1		39		MKI67		39	42	HIST1H4A
40	1588	DSG2		40	1175	OLA1		40	23	HNRNPH1		40		PDE3A		40	74	NUP188		40	1285	EIF4G2		40	11	NUP155		40	7	RPL11		40	8	IVD		40	632	AIP		40	1451	DYNC1LI1		40		MRPL45
41		BAZ1B		41	19	HNRNPH2		41		NFYA		41		RPL7L1		41	644	RRP12		41	165	WBP11		41	722	THRAP3		41	316	TRAP1		41		RBM42		41	12	LRRFIP1		41	170	PBK		41	561	AKR1A1
42	151	HIST1H4A		42	1181	EIF5A		42	17	HNRNPH2		42	880	POP4		42	15	PLK1		42	4	HK2		42	214	CYB5R1		42	8	RPL22		42		NUP205		42		SLK		42	1352	TRMT10C		42	26	SFPQ
43	1341	WDR43		43	1188	LASP1		43	18	FUS		43	126	ADAR		43	98	SF3B6		43	1472	EIF4A1		43		SFXN3		43	21	SNX27		43	36	MYOF		43	9	ESYT2		43	942	CTTN		43		NUP155
44		DARS2		44	1222	TMSB4X		44	591	ACAA2		44	1255	ANXA3		44		RAB6A		44	15	DIDO1		44	14	FKBP10		44	186	HSPA9		44	7	GOT2		44	1217	NEK7		44	1302	METAP2		44	264	RTF1
45	19	ZNF787		45	347	ETFA		45	29	APRT		45		SNX5		45	157	WRNIP1		45	662	SPG20		45	1099	ZNF281		45	1411	TMPO		45	9	TFRC		45	234	TMOD3		45	300	CARHSP1		45	64	LONP1
46	18	RCC1		46	21	FUS		46	772	MESDC2		46	1281	BLVRA		46	184	POLR2I		46	384	NAT10		46		IWS1		46		P4HA2		46	743	ZNF638		46	56	CARHSP1		46		ARPC1A		46		PGRMC1
47		GNS		47	1086	TRIP13		47	867	PGLS		47		PYCR2		47	1002	PDS5B		47		SNAPIN		47	6	HNRNPUL1		47	1489	NUCB1		47	19	SHMT2		47	10	RBM39		47	56	PELP1		47	101	BCLAF1
48	41	CYR61		48	1020	NAP1L4		48	1260	MYOF		48		AAAS		48		PTPN11		48	1384	FKBP3		48	583	CPSF1		48		POR		48	330	U2AF1		48		PELP1		48	1402	PDLIM5		48	1246	DDX21
49		ZNF691		49	1152	AKR1C3		49	1007	NAP1L1		49		FUBP1		49	90	NHP2		49		GTF2H1		49		L1CAM		49	832	CLTC		49	248	SRSF3		49	18	AFG3L2		49	1074	TARS2		49	805	ACADVL
50		C5orf24		50	1164	MCTS1		50	32	C5orf24		50	156	RBM25		50	356	HNRNPA0		50	1466	PTMS		50	31	TUFM		50	52	HNRNPUL1		50		DDX27		50	839	ERP44		50	1657	YAP1		50	1137	SRPRB
51	1607	ESYT2		51	17	ELAVL1		51	1187	PC		51		TK1		51		HMGN4		51	27	PTPN1		51	8	ACADVL		51		KHSRP		51	1246	TFAM		51	983	SARS		51		ATP6V1H		51		NOP9
52	1048	NQO2		52	1145	CMBL		52	28	HNRNPF		52	995	NADKD1		52	97	ZC3H4		52	13	LSM14A		52	105	RPL22		52	292	PRDX3		52	1322	TOMM70A		52	42	LPP		52	140	SARS		52	105	PRPF40A
53	15	API5		53	983	ACTR2		53		NNMT		53		PPIG		53	994	TTI1		53	1514	PGRMC1		53	13	HMGB3		53	621	GLUD1		53		NFS1		53	5	RBM25		53	1458	EIF4H		53	48	ARGLU1
54	184	CTSD		54	1197	GLRX3		54		DDX47		54		CARHSP1		54	470	LMNB1		54	1126	POP4		54	115	SLTM		54	1433	SRRM2		54	47	BCLAF1		54	345	UCHL3		54	215	PDCD5		54	176	KIF4A
55		NSUN5		55		ANXA11		55		TPM2		55	18	SRSF1		55	8	NELFE		55	1435	TUBB4B		55	63	DDX5		55		KIAA1143		55	17	KMT2A		55		UQCRH		55	1130	EDF1		55	1110	COX5A
56	1523	CLK3		56	1144	UQCRC2		56	145	TRA2B		56	768	RAVER1		56		ANLN		56	585	LMO7		56		PGRMC1		56	515	CKAP4		56	1114	CPSF1		56	757	SF3B1		56	32	EEF2		56	308	PES1
57	53	RBM27		57	33	C5orf24		57		TTC4		57	239	EFHD2		57	1029	NPLOC4		57	1408	EEF1A1		57	498	GOLPH3		57	1013	SLC3A2		57		NSUN5		57	616	VPS26A		57	1661	KTN1		57	1189	NAT10
58	16	CHD8		58	1186	PIR		58	748	TOP2A		58	68	SNX1		58		CBX5		58	816	ABCF1		58	280	ELAVL1		58		MRPS28		58	140	CDK13		58	330	ACTR2		58	1423	NNT		58	121	HSPA9
59	1562	GDI1		59	1180	ACTN1		59	947	BRD3		59	1137	EIF1AX		59	70	NSUN5		59	1476	MT2A		59	557	KTN1		59		STRBP		59	496	SLC27A2		59	85	FGF2		59		SH3BGRL		59		PHB2
60	29	WDHD1		60		EML4		60		TDP2		60	632	MDC1		60	836	PCNP		60	1454	LGALS1		60		RBM42		60	12	ZNF24		60	224	DHRS4		60	554	EEF1A2		60	11	NQO2		60		DIDO1
61	24	GTF2F2		61		CKS2		61		ALDH1B1		61	13	DHX30		61		REEP5		61	1565	DUSP12		61		SLC25A13		61	22	RAB8A		61	211	CLIP1		61	708	SNRNP70		61	717	S100A4		61	37	WDR33
62	892	SNW1		62	1206	CKM		62	732	NUCB1		62	61	CPSF7		62		KRT7		62	697	CKAP5		62		RBM28		62	46	RAB13		62	24	PDHB		62	23	HIST1H4A		62	30	ENOPH1		62	31	CPSF7
63	1191	UAP1		63	1190	CNBP		63		UBQLN4		63	1376	SLC9A3R1		63	1157	NONO		63	1393	TUBB		63	9	BUB3		63	23	FKBP10		63	75	HIST1H4A		63	157	ARPC3		63	14	ARPC5		63	71	SMU1
64	1462	GRSF1		64	960	GFPT1		64		KLF5		64		COX4I1		64	607	GTF2F1		64		AAAS		64	700	PLOD3		64		BRIX1		64	156	ETFB		64	1148	HDGFRP2		64	430	CLIC1		64	1075	H1FX
65		SMARCA4		65	161	PWP1		65	33	MAZ		65	184	SAMHD1		65		PHPT1		65		OSBPL9		65	15	ZNF146		65	361	MAP7D1		65	246	FXR1		65	62	LRRC47		65	1541	CKM		65		ATP5O
66	31	LDB1		66	1158	PFN1		66	866	CS		66	877	SMN1		66		SRPRB		66	1349	ENAH		66		INF2		66	64	FXR1		66	320	RBM39		66		CFL2		66	899	AKR1C3		66	34	U2AF1
67	27	ZNF24		67	1150	STMN1		67	801	RRBP1		67	480	ISOC1		67	22	HSPA9		67	1418	TUBA1C		67	27	FXR1		67	17	RAB1A		67	698	DDX5		67	66	RPL35		67	307	AARS		67	10	TFRC
68	86	DDX5		68	1143	ACTN4		68	907	TMOD3		68	268	GTF2F1		68	659	RRP9		68	1453	ARPC3		68	22	SRSF2		68		CRNKL1		68	355	MATR3		68	75	TXNDC17		68	1243	EIF5A		68	61	LUC7L3
69	1555	HSPD1		69		PRC1		69	16	UBTF		69	498	PES1		69	209	PUS7		69	1502	CNBP		69		KHSRP		69	56	RAB31		69		ARGLU1		69	106	PTRF		69	1018	TUBB4B		69	351	IK
70	17	POLD3		70	1126	OTUB1		70		CD3EAP		70	37	DHX38		70	193	SNW1		70	1477	KHSRP		70	18	SDHA		70	471	SLTM		70	76	GAR1		70	43	CCBL2		70	334	AKR1C1		70	33	ARL6IP4
71		NDUFAF4		71	1204	DSTN		71	443	HPDL		71	17	SRGAP2		71	27	CHCHD2P9		71	1407	CDC42		71	378	THOC2		71	137	NONO		71		SSBP1		71	654	SF3B3		71	535	MYL12A		71		CANX
72	460	PNISR		72		THOC1		72	835	NDUFAF2		72		SRSF9		72	1251	ARFIP1		72	1403	RAN		72	16	GOT2		72		STOM		72	151	DDX23		72	1211	DIAPH1		72	138	PAWR		72	397	SLC3A2
73	26	NOP9		73		BROX		73	1227	TES		73	1257	SNX12		73	142	SNRPF		73	1387	TTC1		73	298	RAB10		73	1390	HADH		73	49	CD55		73	44	DDX46		73	19	BOLA2		73	123	DDX23
74		KIF2C		74	876	CLUH		74	137	PRPF38B		74	36	NAT10		74	645	RAB8A		74	1438	IFI35		74	798	SFPQ		74		ZNF148		74		IKBKAP		74	77	GDI1		74	143	ARL6IP5		74	181	KTN1
75	63	OAT		75	1217	CSRP1		75	546	SNRNP70		75	501	GBE1		75	176	NOP56		75		SPAG7		75		ACOT9		75		ZNF146		75	16	ZNF787		75	204	PRDX3		75	69	TXLNA		75	15	ALYREF
76	1283	BROX		76	1154	TPT1		76	286	ARL6IP1		76	236	NUMA1		76		CHMP4B		76	24	TUFM		76		GCLC		76		RBMX		76	167	U2AF2		76	1206	ABCF1		76	20	TIGAR		76		SNX9
77		NUP188		77	1132	HINT1		77	693	H2AFZ		77		NFKB1		77		AIFM1		77	1287	UBAP2L		77		COX17		77	18	RBM3		77	197	LUC7L		77	828	SF3B5		77	534	HN1		77		MRPS28
78		DDX27		78	1123	PDCD5		78	262	IDH3A		78	19	PLOD3		78	1225	PIN1		78	1200	CRIP1		78	150	ARHGEF7		78	25	RAB21		78	18	MAZ		78	1184	COMT		78		CHMP4A		78	21	RBMX
79	61	MRGBP		79	993	NAP1L1		79	683	CDC5L		79	56	RTFDC1		79	40	PLIN2		79	1238	EIF2B2		79		IPO5		79		CTR9		79	69	PDCD11		79		MAP7D1		79		REXO4		79	158	SRSF7
80	40	POLD2		80	154	MESDC2		80	88	ARGLU1		80	1416	MRPL11		80	1056	MYBBP1A		80	1482	BANF1		80	12	DIDO1		80	468	XAB2		80		DDOST		80	769	DCAF8		80	1453	RAN		80	52	ESYT1
81	51	KPNA2		81	1133	PSMD10		81	94	DDX17		81	16	DYNC1LI1		81	621	SF3B1		81	225	H3F3A		81	34	SRSF11		81	59	SRSF11		81	31	RPS7		81	87	DTD1		81	1651	PLOD2		81		CPT1A
82	22	SHMT2		82	99	SCLY		82	1146	UNC45A		82	83	ANXA4		82	53	EXOSC3		82	1508	STRAP		82		P4HA2		82		GNAI2		82		RALA		82	883	UBR5		82	1328	CNBP		82	16	HNRNPA0
83	68	ITPR1		83		CTPS1		83	769	NONO		83	48	DDX21		83	33	H1FX		83	1063	RAB5B		83	17	ZNF24		83	107	GAPDHS		83	1313	PLOD3		83	207	HK2		83	53	SRSF2		83		CHERP
84	23	ALYREF		84	75	COX17		84	537	SOD2		84	321	MPST		84	814	SNRPB2		84	1463	OTUB1		84	188	LUC7L2		84	125	SRSF1		84	15	BMS1		84	398	HINT1		84	164	EIF1AX		84	126	SF3B1
85	779	RBM39		85	1078	ACTC1		85	46	HNRNPH3		85	1230	DDX47		85	154	TOMM70A		85	1255	ABCF2		85	627	HIP1R		85	65	SRSF2		85	352	SRSF7		85	50	RTF1		85		IPO5		85	195	SNRPB2
86	46	SLTM		86	18	ZNF787		86	198	ZNF787		86	26	CD2AP		86		GTF3C2		86	817	RAB1B		86	25	SRSF7		86		WDR18		86	193	DDX46		86	379	SFN		86	18	NAPRT1		86	75	NDUFA8
87	1106	CHERP		87	1176	PDLIM5		87	449	CTNNBL1		87	23	SAP18		87		BPTF		87	66	DKC1		87	489	CCDC124		87	386	NUP155		87		NOL6		87	492	PDAP1		87	163	S100A6		87	174	PTRF
88		DECR1		88	1098	GBE1		88	542	ATF7		88		ACO2		88	13	ESYT1		88		DRG1		88		MIF		88	14	ARMC1		88	51	BBX		88		MYPN		88	547	CSRP1		88		U2SURP
89	651	SLC25A3		89		SLC25A3		89		LANCL1		89	1069	GATAD2A		89	16	CMAS		89		NSRP1		89	24	OXCT1		89	15	RAB14		89	187	CPSF7		89	890	ETFB		89	1171	SUMF2		89	18	FAM32A
90	83	TCOF1		90	1026	PCBP2		90	378	NOSIP		90	45	SRSF3		90	11	CALU		90		MED14		90	413	ATP5B		90	133	GNB1		90	88	ECHS1		90	1137	PNN		90	724	EEF1A1		90	77	DDX46
91	271	CDC42BPB		91	1171	TXN		91	24	CTR9		91	406	PPP1R12A		91	1062	UBXN1		91	219	EFHD2		91	1451	CYR61		91	58	FIS1		91	108	RAE1		91	8	ACP1		91	239	TAGLN2		91	106	SNRPC
92	1060	GGCT		92	1103	CTTN		92	1222	MRPL12		92		CAMK2G		92	30	SHMT2		92		TBRG4		92	1449	HNRNPA0		92	234	DIDO1		92	34	ALYREF		92		NMT1		92	1361	PLIN2		92	49	SRSF3
93	273	DDX23		93	119	PRPF6		93	95	WBP11		93	380	PNN		93	325	NUP85		93	1099	G3BP1		93	182	GTF3C1		93	30	RAB10		93	241	SRSF11		93		PRPF38B		93	437	PFN1		93	35	RBM39
94	25	CTCF		94	1116	CDA		94	950	SPG20		94	1504	SMU1		94	44	MATR3		94	23	MFAP1		94	337	RBM3		94	426	WDR33		94	259	COMT		94	392	WARS		94	100	ELAVL1		94	124	PRDX3
95	28	PMS2		95	29	HNRNPF		95		RBBP6		95	115	RAB13		95		ATP5F1		95		BLVRA		95	400	AK2		95	271	H1FX		95	442	PRPF40A		95	1132	FERMT2		95	859	BLVRA		95	69	FGF2
96		CD3EAP		96	20	MACROD1		96	300	HNRPDL		96	1438	NOP58		96	368	CHMP5		96	1183	EIF1AX		96		ZNF148		96	148	CPSF6		96	189	GTF2I		96	359	SEPT2		96	466	STRAP		96	13	PSIP1
97	39	SMARCE1		97		MDN1		97	118	RRP12		97		MED15		97		CDK5RAP3		97	1376	VPS35		97	41	SLC27A2		97		RBM42		97	986	FKBP10		97	1101	TPRKB		97	99	PXN		97	82	LUC7L
98		ANLN		98	1101	KPNA2		98	236	RTN3		98	20	SUB1		98	197	LUC7L		98	1195	ARFIP2		98	1426	DHX16		98	193	OXCT1		98	120	CDK12		98	35	RAD23A		98	13	TMEM43		98	19	ZNF638
99	834	ILKAP		99	23	UBQLN4		99	699	NUDT21		99	40	DKC1		99	1222	HGH1		99	1595	LRRFIP1		99	549	U2AF1		99	20	RAB2A		99	142	TRAP1		99		CPSF2		99	17	CDC42BPB		99	38	GAR1
100	34	TPX2		100	1166	DBI		100	52	RAB10		100	31	CWF19L1		100		UBE2L3		100	1314	ARPC2		100		STOM		100		UTP20		100	379	VIM		100	255	APIP		100	21	RBM27		100	1162	HNRNPUL1
101		SURF6		101	825	MATR3		101	54	SUPT6H		101	28	SLTM		101	19	PRCC		101	1568	RDH11		101	136	GTF3C3		101	29	RAB1B		101	380	DIDO1		101	37	GDI2		101	446	DUSP12		101	168	CDK12
102	1120	NAPRT1		102	1023	PPP1R2		102	416	RAB1A		102	1125	STAG2		102	131	PTRF		102	1558	CRIPT		102	20	H1FX		102		TBL3		102	158	LUC7L2		102	60	AKR1A1		102	174	C9orf78		102	164	RPL35A
103		DDX56		103	1092	CRK		103		SNX6		103	1216	NUP155		103	113	THRAP3		103	1173	YBX1		103	146	HTATIP2		103	24	LGALS1		103	225	RBM25		103	682	TMSB4X		103	75	TXN		103	20	CPSF6
104	275	MED15		104	1119	TUBB		104	517	BZW1		104	73	ACTR10		104	593	ZC3H14		104		DLD		104	512	PTBP3		104	537	TMA7		104	99	RPL35		104	382	FARSB		104	1574	CALU		104	289	PELP1
105	70	THOC1		105	1157	EIF4A1		105	35	BUD31		105	576	TCOF1		105		ACTR5		105	1210	COPZ1		105	21	SRSF1		105	288	LARP4		105	226	HNRNPA0		105	109	RPL27A		105		ATP1A1		105	22	SUMF2
106	1609	CTR9		106	466	POLR2B		106	274	THBS1		106	94	FBL		106	1024	CCDC86		106	1077	CORO1C		106	706	SNX27		106	27	GOLPH3		106	251	H1FX		106	637	SF3A2		106	1148	DDX19A		106	67	U2AF2
107		DCAF13		107		KLF5		107	77	GNAS		107	905	SEC23A		107		MAP7D1		107	1530	EIF5		107	372	LUC7L		107	379	DAZAP1		107	175	DEK		107	502	SNRPA1		107		PPP1R7		107		RAB31
108	1449	CS		108	1173	S100A4		108	582	ERP29		108	38	UBR4		108	1268	COX5A		108	1064	SEC23A		108	424	HELLS		108	286	THRAP3		108	358	EPHX2		108	27	MRTO4		108	71	SPAG9		108	68	THRAP3
109	30	MAZ		109	64	GSN		109	53	GID8		109	1201	IPO5		109	103	MAZ		109	663	AKR1A1		109	90	MANF		109	370	TOP1		109	78	GATAD1		109	92	RBM8A		109	1299	CNOT1		109		BSG
110	1378	LRRFIP1		110	342	GLUD1		110	735	RSL1D1		110	450	SMARCA5		110	50	GPKOW		110	466	TLK2		110	68	SRSF3		110	414	CKS1B		110	96	UTP14A		110	30	TBL1XR1		110	781	CKS1B		110		ZMYM2
111	79	SFPQ		111	1172	EEF1A1		111		TIMM13		111	1211	PDE12		111	21	PPIL3		111	85	LUC7L3		111	270	U2AF2		111	80	SND1		111		SS18		111	63	LIMA1		111	22	COMT		111		ATP5B
112	1535	CKM		112	1153	TAGLN2		112	474	CD44		112	469	BOP1		112	568	SNRPA1		112	1274	EEF1B2		112	257	MAP7D1		112	602	MTPN		112		CHMP5		112	602	ANXA8		112	1249	NMT1		112		ANAPC1
113	342	ARL6IP4		113	923	ARPC1B		113	580	SRSF1		113	1342	ENOPH1		113		BCL9L		113	1149	BTF3		113	1300	FIS1		113		NUSAP1		113		SLC25A11		113	1091	CHMP5		113	614	OLA1		113	155	NPLOC4
114		RRP15		114	1085	PPIA		114	834	ZFR		114	348	CCDC86		114	539	SF3A3		114	41	PLOD3		114	305	MFAP1		114		ITGB1		114	521	PACSIN3		114	1251	ZC3H11A		114		H2AFY		114	426	CPSF1
115	503	SRSF8		115	1111	RAN		115	401	RBMX		115	910	MCCC2		115	14	HNRNPUL2		115	1372	TUBA4A		115	23	LUC7L3		115	99	PRPF40A		115	128	SNRNP70		115	338	CORO1C		115	1444	PRRC2A		115	24	FBL
116	1414	WBP11		116	44	LRPAP1		116	1066	PDLIM1		116	58	DDX5		116	83	RAB35		116	1108	CALD1		116	138	CD55		116	93	PHF5A		116	283	LUC7L3		116	20	TMA7		116	497	HSPB1		116	50	DHX9
117	1567	NDUFA5		117	838	EDF1		117	181	RAP1B		117	1285	ATL3		117	641	NOLC1		117	10	C5orf24		117	48	SNRPA		117	452	RAB5C		117	298	HNRNPC		117	672	WDR77		117	172	ACOT9		117		PRKCDBP
118		ADAR		118	854	KIF23		118		SLIRP		118	24	LSM14A		118	530	SF3A1		118	142	GATAD2B		118		ECI2		118	47	SRSF3		118	70	CYB5R3		118	103	CAPG		118	24	SUMO2		118	85	C5orf24
119	38	THYN1		119	24	MAZ		119	444	SRP9		119		XRCC1		119	18	RCC1		119	29	GNB2		119	225	SMOC1		119	67	SNRNP40		119		PRDX3		119	142	EXOC8		119	1570	EIF5		119	63	PARP1
120	1129	FHL1		120	1080	FKBP3		120	963	FANCI		120	1046	NPM3		120	102	PNN		120	668	RAB14		120	735	RBM39		120	39	SRSF7		120	423	PRCC		120	11	GLOD4		120	212	LASP1		120	17	GTF2I
121	43	CCDC58		121		FARSA		121		CYC1		121	176	GOT2		121	500	SNX1		121	1249	EEF1G		121	361	CFL2		121		SNX9		121	292	CPSF6		121	34	ACYP1		121	1122	TPT1		121	57	PHF6
122	1089	CALU		122	27	CLTA		122	165	ARL6IP5		122	1091	TWF2		122	1001	PRPF40A		122	1103	SERBP1		122	137	MAP1LC3B2		122		RPL26L1		122	619	REEP5		122	214	CPNE1		122	622	UBAP2L		122	23	RRBP1
123	62	HNRNPU		123	1220	FAM129B		123	25	ATP2A2		123	25	NELFE		123	48	RFC5		123	420	ACAT1		123	59	GRSF1		123	341	RPL34		123		DECR1		123	68	UMPS		123	383	CPNE1		123	66	HNRNPA2B1
124		SP1		124	47	BUD31		124	860	MANF		124	1298	PPP1R10		124	277	ENO3		124	1527	IL18		124		NOP16		124	74	LUC7L2		124	502	SRSF6		124	13	MACROD1		124	1606	EIF1		124		GATAD1
125	133	PRDX3		125	585	PES1		125	896	HNRNPL		125	249	CPSF6		125	232	RPL36		125	1348	EIF2A		125	263	CPSF6		125	31	HK1		125	476	ARL6IP1		125		TES		125	166	LARP4		125	1029	DNAJC9
126	257	UTP18		126	1024	PRPS1		126	706	EXOSC10		126	1439	R3HDM1		126	594	SF3A2		126	1119	RANBP1		126		HSD17B10		126		ERCC2		126		UBTF		126	626	SF3B4		126	1591	DNPH1		126	436	AQR
127	32	MNAT1		127	1097	CSDA		127	216	SAP30BP		127		GALK2		127		FAM50A		127	1282	METAP2		127		FAF1		127	28	DDX3X		127	113	RRP9		127	19	LGALS1		127	748	EIF3L		127	60	HMGN2
128	37	POLR3C		128	1089	S100A11		128	1212	PHB2		128	148	NUCKS1		128		PRPF38B		128	1319	EIF4B		128	460	BCLAF1		128	45	U2AF2		128	52	RPL36		128	1239	TOMM70A		128	287	CSDA		128	144	RPL35
129	1435	HK2		129	1012	CDC42		129	901	IFRG15		129	102	COMT		129	23	DHX9		129	1507	TMA7		129	1442	UFL1		129	304	UBR4		129		RRS1		129	905	RRBP1		129	209	SNAP23		129		GPATCH8
130	45	LMNA		130	691	MED15		130	658	SMC3		130	22	MAP7D1		130	24	HMGB1		130	1334	SEC31A		130	164	SNRPC		130		DDX55		130	26	WDR74		130	88	EEF1B2		130	23	RPL37		130	88	ACIN1
131		UBLCP1		131	1179	HN1		131	841	CHD4		131	64	HK2		131	25	FTH1		131	19	MAP7D1		131	790	PICALM		131	399	LSM14A		131	29	ACAA2		131	659	SNX6		131	473	NUP35		131	207	SF3B14
132	1485	NUP107		132		DBNL		132	164	SNX9		132		CDK11A		132	957	FGF2		132	8	SPIN1		132	29	MAZ		132	306	REEP5		132	195	PSIP1		132	240	RNH1		132	33	PRC1		132		SNAP23
133	279	SRSF2		133	1149	TUBA1C		133	817	HNRNPR		133	774	ACAA2		133	188	PHF5A		133		TTC9C		133	72	GAR1		133	298	SPG20		133	184	HADH		133	105	COTL1		133	573	KPNB1		133	165	SF3A2
134	142	DNAJC8		134	36	HNRPDL		134	121	PLOD1		134	101	GTF2F2		134	990	UAP1		134	1313	GCN1L1		134		GALNT2		134	34	LUC7L3		134	594	RRBP1		134	146	PUF60		134		CRYZL1		134	27	THBS1
135	1603	PMPCA		135	1120	MYH9		135	659	DHX9		135	869	HTATIP2		135	1011	APRT		135	65	CDK11A		135		POLDIP2		135	248	LUC7L		135	272	PLRG1		135	58	PCNP		135	758	NAP1L4		135	25	EXOSC1
136		KPNA3		136		PMPCA		136	782	PES1		136	1577	ZC3H18		136	79	LUC7L3		136	1462	SARS		136	65	RAB35		136	54	RPL30		136		ITGB1		136		UBE2L3		136	1153	SNW1		136	28	RBM26
137	77	UTP14A		137	1053	CDK1		137		HIST1H2BL		137	1282	DDX56		137	632	TFAM		137	53	HNRNPA0		137		HMGN4		137		DDX56		137	95	RPL7		137	634	WBSCR22		137	1351	EIF4A1		137		PTPN23
138	256	DPP9		138	52	EXOSC5		138	623	PLRG1		138	1580	ETFA		138	112	PPP1CA		138	1468	EIF4H		138	522	BASP1		138	222	CCDC124		138	118	PLEC		138	143	CPSF7		138	1081	COPB1		138	459	CBX5
139	1556	MAP7D3		139	1140	BLVRB		139	1195	YES1		139	270	UTP14A		139	844	NDUFA8		139	1017	LARP1		139		ZNF691		139	828	PRPF31		139		C5orf24		139	186	RPL24		139	1517	RAB1A		139	53	RPL21
140	92	ACIN1		140	998	SEPT2		140	1005	EXOSC1		140	1302	HARS		140	882	SMARCE1		140		PTCD3		140	47	IFI16		140	188	ARGLU1		140		ATL2		140	14	CKAP5		140	1491	LGALS3		140	234	RAB8A
141	59	HNRNPUL2		141	901	SEPT7		141	49	PNN		141	27	C9orf78		141	1244	RSL1D1		141	1441	ARF3		141	60	RAB8A		141		RBM17		141	319	MARCKSL1		141	801	PPP1R2		141	436	TOE1		141	110	SNRPA1
142		MKI67		142	206	ERP29		142		TECR		142	1566	STOM		142		SCLY		142	22	RAVER1		142	243	RAB1A		142	96	SNRPA		142	802	HELLS		142	354	ACTN4		142	338	ACTN1		142	669	DYNC1LI1
143		ARL6IP5		143	1147	HSPB1		143	359	SRSF2		143	231	DNAJC17		143	648	SF3B2		143	1391	PDLIM5		143	84	ALYREF		143	84	SNRPB		143	970	RFC4		143	22	NEDD8		143	16	SFPQ		143		MRPL23
144	33	ZNF146		144	1073	CBR1		144	44	ZYX		144		MRRF		144	84	MORF4L2		144	224	DNAJC9		144	156	ACSL4		144	544	YTHDC1		144	71	SNRPB2		144	668	FLNA		144	132	CTSD		144		RAB21
145	50	HNRPLL		145	985	WARS		145		MEPCE		145	1116	HNRNPA0		145	1118	CKM		145	26	CPSF7		145	198	RAB9A		145	1385	WDR4		145	80	PHF6		145	849	ANXA4		145		ANAPC1		145	145	SRSF1
146	1544	DNPH1		146	1046	ACTB		146		CYCS		146	361	FXR1		146	890	TMPO		146	9	FBL		146	33	ACIN1		146	32	THBS1		146	22	SART1		146	1159	STMN1		146		SMARCA4		146	47	SCAF11
147	199	MAX		147	38	SMC3		147	590	SRRM2		147	1260	TTI1		147	28	DNAJC8		147	1097	VASP		147	563	RAB1B		147	53	SF3B1		147	105	RPL10A		147		CRK		147		NFYC		147	46	RAB35
148		MORF4L2		148	651	ZFR		148	722	GTF2I		148	508	UPF1		148		ATG3		148	1230	GOLPH3		148	28	RSRC2		148	35	U2AF1		148	387	HNRNPL		148	886	SF3B14		148	44	GOLGA4		148	172	CDC5L
149	36	CCDC86		149		FLYWCH2		149		BCL9L		149	385	GALNT2		149	713	EXOSC6		149	1421	ARPC4		149	852	SND1		149	38	ACIN1		149	38	YY1		149	191	PIN4		149	364	GCN1L1		149	249	CD2AP
150	178	RANBP2		150	1009	AKR1B1		150		MDN1		150	46	PQBP1		150	63	SUPT16H		150	20	SNX5		150	1413	CS		150		ATF1		150	267	ERH		150	326	FAU		150		ACAT1		150	148	SF3A1
151	1203	PRC1		151	50	SUPT6H		151	762	COA4		151	104	POLA2		151	588	WDR12		151	1356	CSDA		151	46	GNB1		151	1493	LRPPRC		151	21	SRRM2		151		FARSA		151	552	VPS35		151	81	SF3B2
152	1299	S100P		152	277	FAF1		152	938	ACTR1A		152	795	DNAJC9		152	58	ATF7IP		152		AIP		152	576	CAPRIN1		152	170	LMNB1		152	168	SRSF2		152	1077	DNPEP		152	453	GLRX3		152	96	DDX17
153	179	WDR33		153	1202	RNF20		153	848	TUFM		153	93	CKAP5		153		TUBB3		153	32	MBD2		153		STRBP		153	57	EIF3L		153	104	RPL8		153	51	GALK1		153	136	ITPA		153	40	MAP7
154	76	PTRF		154	153	U2AF1		154	603	PPIB		154	660	CDC5L		154	199	HNRNPL		154	296	DDX23		154	338	ERO1L		154	167	RPL14		154	325	NUDT21		154		DDX47		154	570	TES		154	369	TPX2
155	42	SPIN1		155	760	ACAA2		155	1225	SCO1		155	1144	UAP1		155		C9orf78		155	54	ACTR10		155	42	HMGB1		155	1423	GNL3		155	66	RAP1B		155		SDHA		155		TSEN34		155	30	LUC7L2
156	1579	PHB		156		MIF		156	391	LMNB1		156	204	BRE		156	707	SRSF2		156	11	PDS5B		156	376	ACAA2		156		PRPF38B		156	48	SNRPA1		156		DUSP12		156		TRAPPC3		156	29	NONO
157	85	PITRM1		157	1114	FLNA		157	1019	HMGN2		157	319	NUDT21		157	921	PGM1		157	1523	RTCA		157	581	SUPT6H		157	305	DHX9		157	23	H1F0		157	239	RPL7		157	41	DBI		157	54	WDR74
158	78	ELAVL1		158	1121	MAP4		158		PCYT1A		158	1556	SPR		158	331	CFDP1		158	1261	EEF1D		158	277	CPSF7		158		EIF4A2		158	367	PTBP1		158	916	LASP1		158	648	PPIA		158	116	VAPA
159	227	KCTD15		159		LANCL1		159	819	SMC1A		159	34	RBM12		159	309	DDX21		159	1444	CTTN		159		CTR9		159		IARS2		159	910	CWC15		159	224	RAB5B		159	1605	GTF3C3		159	238	TAF15
160	531	BRIX1		160	704	NUP85		160	1181	NUP188		160	521	BAZ1A		160	191	RBM39		160	1366	TUBB6		160	279	UQCRH		160	164	RPL3		160	247	HNRNPA2B1		160	1269	NUCKS1		160		CRK		160	132	SF3A3
161	1171	GRAMD3		161	1037	GALE		161	918	FAHD1		161	51	MPG		161	67	SRP14		161	1489	CDKN2A		161	1315	SEC24C		161	177	GAR1		161	260	HSPE1		161	306	S100A16		161	275	ARPC4		161	188	RPL3
162		RBM22		162	26	PNN		162	342	SRSF11		162	1023	ZMYM3		162	702	WDR70		162	1343	OLA1		162	106	RPL23A		162	88	SNRPD3		162	106	DTD1		162	33	CLINT1		162	65	MARCKSL1		162	94	RPL37A
163	229	ZC3H14		163	875	RANBP1		163	660	RAD21		163	85	THOC3		163	31	ISOC1		163	1411	CKS1B		163	64	CELF1		163	86	HNRNPA3		163	102	PHF5A		163	102	CTTN		163	1629	RBM14		163	939	C11orf54
164	245	CLTC		164	1130	ARPC3		164	935	PRKDC		164	1559	CRIPT		164	137	PRKAR2A		164	1304	CDK1		164	772	NOP56		164		ARPC5L		164	172	SNRNP27		164	810	PRRC2C		164	103	NELFA		164	112	SRSF2
165	1593	ARHGEF7		165	1016	HDLBP		165		NUP133		165	179	RFC2		165	26	RAB7A		165	14	ENOPH1		165	49	HNRNPA3		165	37	NUDT21		165	39	RPL23A		165	686	TPM4		165	1152	CDV3		165		GTPBP4
166	101	PHAX		166	898	PRPF40A		166		POGZ		166		FRG1B		166	349	SNRPD1		166	178	ATF1		166	32	CDC5L		166	43	MYO1B		166	35	WBSCR22		166	555	CDC42		166	284	PPP5C		166	226	RPL17
167	528	PSIP1		167	212	HNRNPH3		167	469	GALNT2		167		SKP2		167	51	TOP1		167	1188	SUCLG1		167	380	RRBP1		167	150	DDX46		167	312	HMGN2		167	26	LANCL2		167	392	EEF1B2		167		ROCK2
168	64	ATP5A1		168		CYR61		168	991	UHRF1		168	593	LMO7		168	93	H2AFZ		168	1423	LGALS3		168		PHB2		168	154	RPL35		168	334	PARP1		168	1254	SHMT2		168	207	ACTR2		168	151	RPL36AL
169	882	LRPAP1		169	1074	EEF1G		169	784	SUMO1		169	867	CD44		169	132	DBR1		169	1593	NOP16		169	773	NUCB2		169	82	RAB35		169	98	RAB31		169	156	TCOF1		169	543	DSTN		169	143	ZMYM3
170		DDX21		170	1194	SRM		170	807	SSRP1		170	461	H1FX		170	456	SSRP1		170	479	CCDC86		170		PCF11		170	205	SNRPC		170	44	CELF1		170	892	BANF1		170	1325	FNTA		170	41	SUMO1
171		TRAP1		171	1107	HSD17B4		171	132	RAB35		171	1113	THOC6		171	383	HNRNPH1		171	1480	EIF5A		171	165	SNRPF		171	79	RBM25		171	395	HNRNPA1		171	53	FUS		171	365	EEF1D		171	44	PTBP1
172	586	ACOT9		172	562	GALNT2		172	1009	HMGN1		172	396	RAB1B		172	340	SF3B3		172	1322	PCBP2		172	96	RBM26		172	51	DDX6		172		ERCC2		172	24	DTYMK		172	36	CBS		172		TUBB2A
173	47	U2SURP		173		LPP		173	447	LIN7C		173		EIF2B5		173	43	HMGB3		173	978	DDX3X		173	26	PRPF6		173	1455	ETFB		173	83	RPL30		173	16	RDX		173	1549	HGS		173	98	ACSL4
174		ARFIP1		174		NAA50		174	1021	FAM129B		174	1475	PARP2		174	691	SNRPGP15		174	1263	DDX6		174	103	SMU1		174	707	ACADVL		174	101	ACIN1		174	910	VPS35		174	15	TXNDC17		174	95	DAZAP1
175	1260	TIMM8A		175	1018	DECR1		175	621	DNMT1		175	1316	EIF4G2		175	64	RPRD2		175	18	U2AF1		175	431	RPL35		175	877	CDV3		175	406	HMGN3		175	970	EEF1A1		175	1653	SUCLG1		175	1212	GSN
176	488	WDR18		176	1072	EEF1D		176		ADNP		176	241	SSRP1		176	109	APEX1		176	1362	PIR		176	95	PHF5A		176	62	CDK12		176	540	SMARCE1		176	248	RPL19		176	216	MYH9		176	213	H3F3A
177	1382	ABCE1		177	1122	SFN		177		ME2		177	43	RPS6KA3		177		POLA1		177	417	CCNT1		177	50	SF3A2		177	40	HNRNPH3		177	91	HNRNPH3		177	21	U2AF1		177	158	CDK5		177	43	HNRNPA1
178	297	LUC7L		178		FUBP1		178		BAZ1A		178		GTF2H1		178	66	ACIN1		178	1464	ARPC1B		178	1162	CSTF2		178	127	EIF1AX		178	123	SF3B2		178	584	TMSB10		178	123	NACA		178		VAT1
179	794	SMARCC2		179		CDV3		179	264	CALU		179	137	BBX		179	41	CDKN2A		179	1400	HINT1		179	404	PLK1		179		LIMA1		179		TSPYL1		179	111	DDX42		179	1222	TUBB		179	230	ARL6IP1
180	44	HMGA1		180	1110	EIF1AX		180	725	HNRNPUL2		180	35	TTK		180	32	ZMYM3		180	1533	PPP1R2		180	328	RAB14		180	85	CKAP5		180	89	SF3B4		180	1176	TWF2		180		CLNS1A		180	130	RPL7A
181	71	FUBP1		181	60	POLR2I		181	624	PRPF4		181	1163	HSD17B10		181	820	SEPT7		181		ATAD2		181	66	SF3B14		181	104	EIF3K		181	166	AQR		181	453	ENSA		181	332	ACTN4		181	1015	SLC9A3R1
182	887	PDS5B		182	30	PPP2R1B		182	442	RBM25		182	208	PRPF4		182	991	FAM129B		182	38	SNRNP27		182		RBM4		182	564	UFL1		182	364	HNRNPA3		182	168	DDX24		182	1558	RAB2A		182	131	RPL27A
183	88	DUS3L		183	695	DCTN1		183	505	FBL		183	939	DBN1		183	778	SEC13		183	468	RAB10		183	37	SNRPB2		183	212	BAZ1B		183		ZMYM2		183	163	CBR1		183	671	CAPRIN1		183	687	UFD1L
184	926	SNAP23		184	1127	VPS35		184	638	PSIP1		184	792	UNC45A		184	1195	UBE2M		184	31	PHF6		184	253	CBLN4		184	258	METAP1		184	144	RPL3		184	723	SF3A1		184	560	MNAT1		184	51	HNRNPH3
185	48	TCERG1		185	1112	EIF4G1		185	31	USP39		185		TFAP2A		185		PAPOLA		185	1483	CFL1		185		SEC11A		185	210	RPL13		185	65	SOD2		185	17	MSN		185	248	ETF1		185	115	SRSF11
186	1028	ACAA2		186	1063	EIF2A		186	715	EXOSC2		186	151	PRPF19		186	474	RTFDC1		186	969	ARCN1		186	446	FUS		186	117	RAB9A		186	236	B2M		186	31	ARHGDIA		186	418	EIF4G1		186		BAP18
187	1090	CPSF7		187	37	HIST1H4A		187	75	PUF60		187	70	CUL3		187	450	NPM3		187	834	CKM		187	140	HADHA		187		MAD1L1		187	149	LEO1		187	25	APRT		187	787	VPS29		187	102	ZFR
188	52	HMGN3		188	615	RTF1		188	233	ACIN1		188		DSG2		188		ITGB1		188	33	DDX46		188	948	NAT10		188	68	SF3B14		188	58	SF3B1		188	1051	SLC9A3R1		188	221	VCL		188	79	SF3B5
189	49	PES1		189	63	CHD4		189		SRSF10		189	1420	CTR9		189	1110	NUDCD1		189	12	RBM39		189	120	MYO1C		189	149	CAPRIN1		189	67	RPL13		189	38	KTN1		189	48	S100A13		189	39	CD55
190	1134	U2AF1		190	1048	GNB2		190	833	MED15		190	1557	OAT		190	114	SCAF11		190	1499	DRG2		190	1395	DRG1		190	364	BANF1		190	82	SF3A1		190	547	EIF5A		190	196	NAPA		190	90	DEK
191	55	SUMF2		191	1169	STRAP		191	325	CPSF7		191	764	GTPBP4		191	34	GOT2		191	1488	PFN1		191	92	KRT7		191	41	ELAVL1		191	25	PRPF3		191	955	BZW1		191	496	DDX6		191	108	PPIB
192	1410	EIF5B		192	35	EXOSC10		192	518	GTF2F1		192	164	PPWD1		192	54	RANBP3		192	789	SNX9		192	89	RPL26		192	119	RPL27		192	57	SF3B3		192	91	ARPC1B		192	1052	TUBA1C		192		BRD3
193	524	SUB1		193	1170	TUBB4B		193	967	HMGN3		193	197	PPID		193	75	POLR2A		193	1267	MAP4		193	85	RAB13		193	50	G3BP1		193	40	RPL35A		193	138	ACTB		193	404	UTP14A		193	32	CDC73
194	558	GPKOW		194		ARPC5		194	736	SARNP		194	1185	DTYMK		194	238	CSNK1A1		194	1271	EIF5B		194	220	HK1		194		MDH2		194	32	PPP1R10		194	203	WDR74		194	792	EIF3C		194	140	AP3D1
195		CDK2AP1		195	28	TIGAR		195	888	EXOSC4		195	71	UBE2M		195	465	SMARCA5		195	17	XRN2		195		PSMG3		195	200	RPL9		195	1220	VAPA		195	915	FASN		195	38	NAT10		195	341	SUPT16H
196	1068	PEBP1		196		ILK		196	503	ATP5B		196	815	POLR3E		196		METTL1		196	270	RAB1A		196	1446	SLC25A1		196	49	MYO1C		196	127	SNRPD1		196		CCDC124		196	382	EIF3K		196	84	NHP2L1
197		PDCD6		197		SCAF8		197	411	CIAO1		197		EXOC2		197		CYCS		197		BRIX1		197	167	RAB7A		197	44	ACSL4		197		PC		197	1057	EIF4A1		197	1568	CD109		197		CD44
198	163	MRE11A		198	749	TSR1		198	1127	ECHS1		198	33	DNAJB1		198	42	CWF19L1		198	386	RAB5C		198		ZNF706		198	61	RAB7A		198		NRAS		198	1089	MYH9		198	1398	PDLIM1		198	134	RPL28
199	806	SCAF11		199	1049	EEF2		199	1242	TUBB6		199	1422	WAC		199	397	NIT1		199	925	CAPRIN1		199	467	TRMT112		199	389	RPL32		199	467	SCFD1		199		NMD3		199		TIMM23		199		DDX42
200	1169	PELP1		200		CDKN2A		200	534	PRCC		200	121	RBM39		200	765	SRSF7		200	923	FARSB		200	432	CTSD		200	75	EIF3H		200	115	SUB1		200	46	TBCB		200	1422	LGALS1		200		HELLS
201	104	SMNDC1		201		CSTB		201	201	U2AF1		201	750	AKR1A1		201	234	CPSF6		201	584	HIST1H2BL		201	161	SUB1		201	253	GRSF1		201	59	RPL11		201	552	TFG		201	1204	MEPCE		201		RSRC2
202	170	SRRM2		202	1068	YBX1		202	1071	DDX5		202	63	U2AF1		202	459	CUL4B		202	1031	ELP2		202		RALY		202	103	G3BP2		202	55	SF3A2		202	160	LUC7L		202	1520	PML		202	55	HNRNPH1
203	1012	NOP16		203	398	SRRM2		203	504	SNRPE		203	971	ZC3H14		203	592	RPL28		203		U2SURP		203	208	SUMO3		203	70	EIF3A		203	523	SLC9A3R1		203	368	MCTS1		203	1308	ABCE1		203	1112	TIGAR
204	489	POLR2F		204	903	S100A10		204		INF2		204	32	DBNL		204	370	LMNA		204	1491	LASP1		204	43	ARGLU1		204		MAP1LC3B2		204	233	SUMO1		204	285	SEC13		204	319	MYL6		204	189	SHMT2
205	75	LARP4		205	1019	ZC3H4		205	627	HNRNPU		205		GOSR1		205	130	RTCB		205	1538	CPNE1		205	594	DAZAP1		205	106	RBM26		205	45	RPL15		205	897	LGALS3		205	853	EIF4E		205	127	RBM25
206	1594	PNN		206	31	SAP18		206	30	ARL6IP4		206	467	CDC73		206		MRFAP1		206	607	ATP5O		206	40	SF3A1		206	73	SF3B2		206	973	AFG3L2		206	1194	MTA1		206	227	TCOF1		206	163	P4HA1
207	957	DDX17		207		NMT1		207	144	TAF15		207		LANCL2		207	46	HMGB2		207	1237	NACA		207	35	SNRPA1		207	55	SF3B5		207	60	RPL4		207	966	AK2		207	1084	CRIPT		207	150	SF3B3
208	192	PSME3		208	1030	ARHGDIA		208	767	B2M		208	667	SMC3		208	315	METAP1		208	197	UBR4		208	36	ARL6IP4		208	91	CPSF7		208	41	NUP98		208	396	PRPSAP1		208	1038	CALD1		208	70	HNRNPH2
209		CDK11B		209	711	CDK12		209	818	NPM3		209	312	SNW1		209	94	ARL6IP4		209	1551	NTMT1		209	1345	MESDC2		209	95	SF3A2		209	129	RPL17		209		CCNT1		209	1377	SEC23A		209	114	CKM
210	308	HTATSF1		210	999	NDUFAF2		210	944	GTF2E1		210	803	LARP4		210	244	RAB14		210	67	TSR1		210	355	#VALUE!		210	124	RPL38		210	124	SNRPB		210	343	COPG1		210	1485	GTF2F1		210	118	HNRNPA3
211	354	RBMX		211	1148	TUBB4A		211	104	RCN1		211		RAB2A		211	29	RPL36AL		211	1088	HNRNPF		211	69	SF3B1		211	665	GRWD1		211	27	RPL27A		211	197	PPP2R2A		211	687	SERBP1		211	177	UQCRH
212	87	POLR3F		212	370	SRSF6		212	666	ACTL6A		212		ZC3H11A		212	250	HMGN3		212	699	TSTA3		212	635	G3BP1		212	98	ARL6IP4		212	276	SRSF5		212	882	G3BP2		212	1367	DCTN1		212	1073	HNRPLL
213		RBM42		213	241	SRSF5		213	462	SRP14		213	138	SMARCC2		213	438	PLEC		213	665	PPP1R12A		213	778	CALU		213	178	PICALM		213	194	RBM26		213	264	APEH		213	979	TBC1D5		213	153	ACAT1
214	115	YTHDC1		214	1033	EEF1B2		214	407	SF3B4		214		PRPF31		214	36	KIF1BP		214	1389	ACTN1		214	619	PACSIN3		214	69	SERBP1		214	37	DDX24		214	728	SF3B2		214	601	PRKAR2A		214	36	ERH
215	303	PTPN2		215	307	GID8		215	774	LSM3		215		RXRB		215	776	SF3B4		215	1406	ACTR2		215	163	ZFR		215	126	C5orf24		215	299	PUF60		215	36	TXNL1		215	57	TXLNG		215		FUBP1
216	1136	CCAR1		216	1124	PLS3		216		PPID		216	664	INTS3		216	275	SUB1		216	1503	PDCD5		216	101	DSP		216	81	SNRPB2		216	265	HNRNPM		216	28	VPS45		216	407	ABCF1		216	133	RPL27
217	93	GATAD2A		217		ACADVL		217	41	RAB7A		217	149	PSMG3		217	78	GNL3L		217		MYO1B		217	30	SF3B5		217	48	SF3B4		217	77	SNRPD3		217	115	CDK13		217	121	FLNA		217	59	SF3B4
218	1494	MCTS1		218	1211	FAM203A		218	62	GNL3L		218	620	SNRPA		218	432	WDR5		218	39	U2AF2		218	766	SERBP1		218	520	EEF1A2		218	137	SNRPA		218	477	PLS3		218	1581	PRPF6		218		TRA2B
219	60	C9orf78		219	1198	SFPQ		219		DBNL		219	41	ILKAP		219	73	CUL1		219	1116	FAM129B		219	38	CDK12		219	135	RPL35A		219		POLR1A		219	1161	NOP9		219	970	ARFIP1		219	196	SNRPB
220	97	FUS		220		SNX2		220	69	PLEC		220	282	DDX17		220	80	U2AF2		220	1037	COPG1		220	116	LMNB1		220		LMO7		220	94	#VALUE!		220	336	TPT1		220	782	PIR		220	198	RPL30
221	1436	DDX46		221	738	GATAD2B		221	663	POLR2E		221		GTF3C1		221	960	SRSF11		221	1312	FSCN1		221	191	HNRNPH3		221	60	SUB1		221	117	ZC3H4		221	29	NCOR2		221	1410	KDM5C		221	282	MATR3
222	56	HNRPDL		222	65	PGM2		222	568	SNRPB		222	814	QKI		222	169	SEPHS1		222	1557	TNKS1BP1		222	57	SF3A3		222	132	RPL23A		222	1073	NAT10		222	816	CNBP		222	321	ARL6IP4		222	246	THOC6
223	364	WBSCR22		223	1052	CLINT1		223	788	TCERG1		223	30	WDR12		223	1107	UBA3		223	745	RBM3		223	422	ARPC5		223	152	ESYT1		223	186	SNRPF		223	47	RPL34		223	1329	SNRNP27		223	535	FAM129B
224	107	CD2BP2		224	431	B2M		224		CELF1		224		NNMT		224	140	SUMO1		224	1471	PDLIM1		224	425	GTF2F1		224	92	RBM39		224		CASK		224	475	SRSF7		224	27	MAP7		224		ELP2
225	57	TAF15		225	89	CIAPIN1		225	486	CSNK2A1		225	827	NT5DC1		225		GATAD1		225	1544	DDT		225	86	DHX9		225		YY1		225	742	ESYT1		225	1219	TBCE		225		FHOD1		225	78	KRT17
226	95	DHX36		226	1062	DDX6		226	631	SNRPD3		226		ACOT13		226	60	RCC2		226	34	ZNF146		226		SIN3B		226	197	RPS20		226	263	HLTF		226	543	SNRPB		226	25	RAVER1		226	136	AFG3L2
227	202	FGF2		227	222	CELF1		227		NMD3		227	514	SARNP		227	1124	PLRG1		227	741	SLTM		227	77	HNRPDL		227	114	RPL7		227	1020	MDH2		227	947	SF3A3		227	73	ARPC5L		227	236	SNRPD2
228	1053	SDHA		228	750	ATP6V1B2		228	36	DAZAP1		228	189	ACIN1		228	685	ACO1		228	1327	ACTB		228	58	SNRPB		228	97	SF3A1		228	97	RPL13A		228	574	ACTN1		228	42	BROX		228	300	EXOSC6
229		ORC3		229	1041	RSL1D1		229	520	ERH		229	175	PLA2G4A		229	37	GTF2F2		229	376	PACSIN3		229	112	MDH2		229	90	RPL26		229	33	SF3B5		229	984	PDLIM1		229	62	UTP18		229	194	HNRNPC
230	315	CWF19L1		230	138	AKR7A2		230	186	SQSTM1		230	1094	GNB2		230	491	SNRPE		230	872	RAB11B		230	256	SCAF11		230	169	HNRNPF		230	122	RAB7A		230	323	ANXA6		230	84	HDAC3		230	228	RPL36
231		CD109		231	1102	MYL6		231	853	HDAC2		231	534	CTNNBL1		231	216	CPSF1		231	228	DDX24		231	759	KIAA0101		231	94	SNRPA1		231	81	SF3A3		231	1045	TUBA4A		231	63	PPP1R12A		231	58	PLEC
232	384	RAB31		232	160	TAF15		232		MAP4K4		232	499	REEP5		232	55	RAD21		232	138	RNF168		232	542	WDR33		232	472	EIF4B		232	73	RPL18A		232	230	PHF6		232	94	SRSF7		232	241	HMGN1
233		CHAF1B		233	40	DAZAP1		233	713	AK2		233	1146	WDR33		233	133	HDGF		233		FRG1		233	180	HNRNPH1		233	363	SNX12		233	191	FBL		233	980	ACY1		233	52	GRWD1		233	45	RAP1B
234	267	GALNT2		234	702	SRSF2		234	497	HSPE1		234	496	WDR82		234		KTN1		234	428	LARP4		234	219	RAVER1		234	153	BASP1		234	274	TCERG1		234	112	RPL8		234	29	SMARCE1		234	91	MAZ
235		ZNF281		235	1234	HADHA		235	1025	XRN2		235	44	TATDN1		235	935	PDXK		235	1484	CSRP1		235	313	RAB2A		235	199	RPL29		235	421	NPM1		235	827	CLUH		235	208	MAP4K4		235	600	AIP
236	1591	CPT1A		236		IMPA2		236		NAT10		236	1308	SULT1A3		236	118	SPIN1		236		UBE2D2		236	108	NONO		236	63	ERH		236	111	GTF2F2		236	67	SRSF3		236	1194	EIF4B		236	56	HNRNPL
237		NOP2		237	80	TRMT1L		237	637	VIM		237	65	LDB1		237	635	QTRTD1		237	1457	CLIC1		237	585	LGALS1		237	113	RPL7A		237	215	RPL37A		237	182	TUBB4A		237	1486	TUBB6		237	530	FLII
238	351	TMPO		238	949	PLA2G4A		238	531	SNRPD2		238	136	POP7		238	629	SNRPB		238	16	CDC42BPB		238	139	TLK1		238	100	RPL37A		238	160	SRSF1		238		DNAJC21		238		CHMP4B		238	76	CHCHD2
239	162	EMG1		239	881	ANXA2		239	40	RAB9A		239	1004	BRD3		239	210	TUBB4B		239	423	WDR3		239	436	RPL13A		239	311	EDF1		239	133	MYO1C		239	325	RPL36		239		PPP6R3		239	1170	FAHD1
240		COX5B		240	172	CHERP		240	650	PDIA4		240	1501	CYC1		240		CS		240	348	KLHDC4		240	54	RAP1B		240	252	SCAF11		240	86	RPL14		240	927	SNRPF		240	672	IDI1		240	111	RAB7A
241	124	MBNL1		241		GTF3C1		241	417	SNRPD1		241	144	RING1		241	846	LIG1		241		C2orf49		241	246	RCC1		241	166	RPL10A		241	141	SNRPE		241	840	ZYX		241	294	DCTN2		241	62	LMNB1
242	69	CCNH		242		DYNC1I2		242	803	SKIV2L2		242		NCOA5		242	148	PQBP1		242	1430	RNH1		242	485	VTA1		242		SNRNP27		242	1142	RIF1		242	101	C19orf43		242		NAGK		242	119	RPL32
243	561	P4HA2		243	371	TRA2B		243	904	GAR1		243	1132	POLR3C		243	61	SRSF3		243	170	DYNC1LI1		243		CDKN2AIP		243	111	SF3A3		243	145	HNRNPH1		243	948	DNAJB4		243	1561	DNAJA2		243	128	PQBP1
244	377	GNPNAT1		244	149	RBM39		244	382	DHX38		244	1013	TLK2		244	108	KRT17		244		PRPF31		244	352	RPL13		244	256	RPL15		244	1238	ELAVL1		244		ACADM		244	58	UBE2I		244		CHMP4B
245	72	HNRNPA1		245	1203	BANF1		245	633	PHF5A		245	425	MBD2		245	96	ACSL4		245	1118	EIF4G1		245	622	DDX3X		245	134	THOC2		245	883	SCAF11		245	284	DDX3X		245	1532	PFDN1		245	625	GRB2
246	99	CHCHD2P9		246	1025	G6PD		246	519	SF3B14		246	947	RAB5B						246	1478	PRDX6		246	324	RAB21		246	194	RPL8		246	228	BUD31		246	374	NME1		246	1262	PCBP2		246	166	RPL4
247	102	HNRNPA0		247	1129	DNAJA2						247	1080	KRT7						247	1066	SND1		247	121	GNAS		247	72	EIF3E		247	171	RPL21		247	964	MAP4		247	184	S100A11		247	120	RPL13
248	992	PHF6										248		PLEK2						248	1100	EIF3E		248	441	RPL18		248		LAMB1		248	214	EMG1		248	451	ATP6V1E1		248	1285	TUBA4A		248	285	PHB
249	970	DNAJC9										249	981	NSUN5						249	1292	MYH9		249	1447	SRRM2		249	265	#VALUE!		249	165	ACSL4		249	1283	FKBP10		249	282	EEF1G		249	270	ELAVL1
250	66	MPLKIP										250	412	LMNA						250	394	RAB8A		250	1068	NAPRT1		250	184	RPS26		250	43	PPIB		250	324	CCDC12		250	31	ZYX		250	227	TARDBP
251	526	LUC7L3										251	634	PNO1						251	1320	GDI2		251	1460	TMPO		251	89	PABPN1		251	596	TPX2						251	86	TPM3		251	138	RPL10A
252		HCCS										252		SLC25A3						252	231	KIAA0101		252	734	RBM25		252	83	RPS5		252	107	RPL32						252	1097	PPP4C		252	146	SUB1
253	694	PRCC										253	376	PRCC						253	180	NUDT21		253	44	RAB31		253	1427	GGCT		253	135	AKR1C1						253	978	RAB14		253	100	DKC1
254	514	MINPP1										254	1265	FKBP3						254	1528	GMPPA		254	244	NUDT21		254	76	EIF4G2		254	143	RPL12						254	340	EIF4G2		254	74	NUDT21
255	125	EED										255	1089	GMPPB						255	1375	VPS26A		255		TSPYL1		255	162	VAPA										255	690	YBX1		255	650	SSRP1
256	1614	ECHS1										256	202	EIF4A3						256	926	SPATA5L1		256	665	G3BP2		256		RAB5B										256	602	CLINT1		256	183	SNRPD3
257	995	PGM3										257	373	KRT8						257	1182	UPF1		257	168	QKI		257	229	SQSTM1										257	80	RAB21		257		GOSR1
258	791	EXOSC1										258	274	MDH2						258	333	TTC4		258	643	NSUN5		258	183	CORO1C										258	68	HNRPDL		258	229	PACSIN3
259	234	RPUSD2										259	1550	IK						259	878	EIF3D		259	357	ZC3H14		259	112	YBX1										259	709	COPZ1		259	242	SNRNP40
260	1576	NFS1										260	1254	HSPD1						260	1446	DSTN		260	53	SNRPD3		260	120	USP39										260	1229	DNAJC9		260	275	RPL34
261	569	U2AF2										261	152	SUPT16H						261	976	EIF3H		261	81	ERH		261	751	PRKAR2A										261		SAFB2		261	86	GEMIN4
262		HMGN1										262	1057	DDX23						262	693	COPA		262	1424	DYNC1LI1		262	319	DDX5										262	72	ZC3HAV1		262	498	DYNC1I2
263	58	DKC1										263	1226	PPP2R5E						263	1326	WDR1		263	402	TCOF1		263	473	CRIPT										263	1335	FAM103A1
264		UTP20										264	99	CSTF2						264	1500	GLRX3		264	91	HSPE1		264	533	ACTC1										264	1232	EIF5B
265	116	PLRG1										265	172	AFG3L2						265	880	EIF3C		265	80	NDUFA8		265	66	ALYREF										265	361	CCDC58
266	1508	CDV3										266	60	WDR3						266	1401	ACTN4		266	99	FGF2		266	192	SNRPF										266	650	RAB11B
267	318	GPX1										267	158	SOD2						267	765	UAP1		267	207	TARDBP		267		DCTN3										267	109	BTF3
268		HMGN2										268		KIF11						268	984	ACTC1		268	671	HNRNPF		268	231	POLR1B										268	681	NAP1L1
269	139	KIAA0101										269	1486	HSPA14						269	1505	TXN		269	184	PPIH		269		SIN3B										269		PITPNB
270	82	SARNP										270	600	ACTR3						270	74	BAZ1A		270	1425	SCRIB		270	207	KIAA0101										270		CYR61
271	145	RAE1										271	673	WDR5						271	57	UBE4B		271	176	TOE1		271	347	DNAJC8										271		FLAD1
272	211	PLIN2										272	263	LEO1						272	1227	TCEA1		272	433	EIF3K		272	371	SBDS										272	1112	HIST1H4A
273		ENSA										273	618	NUCB2						273	852	PA2G4		273	229	RPL30		273	173	BCLAF1										273	555	CD2BP2
274	180	SRSF3										274	483	PPP4R2						274	279	PHAX		274		SNRNP27		274	202	RPL27A										274	98	COA4
275	1199	EIF3J										275	57	FAM83D						275	58	PLIN2		275	961	PRRC2A		275		CKM										275	1280	BZW2
276		REXO4										276	146	PTPN2						276	88	RRBP1		276	1352	BRIX1		276	195	RSL1D1										276	79	RALY
277	454	SUPT6H										277	1591	S100P						277	1092	EIF3L		277	67	RSL1D1		277	247	EEF1A1										277	167	WDR1
278	535	DDX52										278	1271	ARFIP2						278	21	DEK		278	334	RPL34		278	251	ABCF1										278	40	GNPDA1
279	386	GSTM3										279	494	MRTO4						279	366	MPHOSPH6		279	221	PSIP1		279		SRP68										279	34	TIMM8A
280	274	NELFA										280	1021	ATL2						280	73	VIM		280	335	RPL38		280	232	HNRNPH2										280	634	AGO2
281	765	CPSF6										281	1084	TP53RK						281		FAM81A		281	245	GEMIN4		281	77	EIF3D										281		NSF
282	84	ISOC1										282	153	AP3M1						282		EHMT2		282	51	SF3B2		282		RAB11B										282	236	THRAP3
283		USP3										283		PPP6R1						283	1429	PMM2		283	1184	RAB5C		283	161	RRBP1										283	1363	WIBG
284	65	RCC2										284		GMDS						284	243	ANXA4		284	330	HMGA1		284		MAPK1										284	354	AARSD1
285	106	POGZ										285	257	HNRNPA1						285	543	RAB21						285	244	CNP										285	244	LIMA1
286	143	PPP2R5C										286		IDI1						286	617	PRPS2						286	78	RPL31										286	156	HDLBP
287	127	APEX1										287	459	SMC1A						287	1309	BZW2						287	834	HN1										287	249	ARPC1B
288		ORC6										288	772	GRHPR						288	1330	PEBP1						288	493	ARPC1B										288	815	G3BP1
289	1196	ATP6V1E1										289		C16orf80						289	110	CPSF6						289		RBM4										289	989	SEPT2
290	747	CD55										290	108	PPP1CB						290	630	ACTR3																		290	1045	COPE
291	300	LUC7L2										291	727	PTRF						291		MCCC2																		291	516	NAA50
292	161	CDC5L										292	178	RAB21						292	1414	DBI																		292	35	WDR18
293	146	MCCC2										293	1095	ZNF787						293	1367	ANXA5																		293	144	USP15
294	797	CNP										294	320	HNRNPM						294		PIN4																		294	615	MAP4
295	169	KPNA4										295	39	DHX36						295	1422	STMN1																		295	789	GPX1
296	299	SRP9										296	846	ACSL3						296	1065	CAD																		296		FNBP4
297	500	NUP93										297	145	TRIM25						297		RAD23B																		297		ABCF2
298	1118	P4HA1										298	590	EP300						298	1493	CMPK1																		298	710	RAB5C
299	1542	USP8										299	97	TPRKB						299	430	ATL2																		299	937	CDK1
300	154	GATAD2B										300	128	CTNND1						300	1318	PRPS1																		300		INTS3
301	159	HNRNPA2B1										301	132	CDC42BPB						301	1281	NAA10																		301	876	COPA
302	1153	ACSL3										302	76	PPP5C																										302	286	RPLP2
303	90	SNRNP70										303	287	GPKOW																										303	124	FASN
304		SHCBP1																																						304	932	ACTC1
																																								305	107	P4HA1
																																								306	1164	G3BP2
																																								307		POLA2
																																								308	884	WBP11
																																								309	39	SUMO3
