# Supplementary material for: Extensive cargo identification reveals distinct biological roles of the 12 importin pathways
Source: eLife. 2017 Jan 24;6:e21184. doi: 10.7554/eLife.21184 (PMC5305215; doi:10.7554/eLife.21184)
Supplement: Supplementary file 6. — (A) Extraction of the GO term enrichments of the 2nd-Z-15% cargoes. The 2nd-Z-15% cargoes were analyzed for GO term enrichment in (C). The terms that were significantly enriched (p<0.05, cyan) in the 2nd-Z-15% cargoes of four or fewer NTRs were selected, and terms that represent many similar terms are presented. With the p-values, the numbers (#) of cargoes annotated with each of the terms are presented. Total No. represents the number of proteins annotated with each term in the database. Related terms are bundled in the same color. For the 3rd-Z-4% cargoes, see Figures 5 and 6. The correspondences between each 2nd-Z-15% cargo and GO term are summarized in Supplementary file 10. All the GO terms annotated to the 2nd-Z-15% cargoes are listed in Supplementary file 8. (B) Full table of the GO term enrichments of the 3rd-Z-4% cargoes. The 3rd-Z-4% cargoes were analyzed for GO term enrichment. For all combinations of GO terms and NTRs, the p-values for the term enrichments in the 3rd-Z-4% cargoes and the numbers (#) of cargoes annotated with the terms are presented. The numbers following ‘# in’ are the total numbers of 3rd-Z-4% cargoes. Total No. represents the number of proteins annotated with each term in the database. Cyan, p<0.05. Figures 5 and 6 were extracted from this table. This table was derived from Supplementary file 7, and see Supplementary file 7 to retrieve the protein accessions. (C) Full table of the GO term enrichments of the 2nd-Z-15% cargoes. The 2nd-Z-15% cargoes were analyzed and are presented in a manner similar to that in (B). (A) was extracted from this table. This table was derived from Supplementary file 8, and see Supplementary file 8 to retrieve the protein accessions. DOI: http://dx.doi.org/10.7554/eLife.21184.022 [file elife-21184-supp6.xlsx]

## Sheet: Legend
Supplementary file 6
Gene Ontology (GO) term enrichments of the identified cargoes
A. Extraction of the GO term enrichments of the 2nd-Z-15% cargoes
The 2nd-Z-15% cargoes were analyzed for GO term enrichment in (C). The terms that were significantly enriched (p<0.05, cyan) in the 2nd-Z-15% cargoes of four or fewer NTRs were selected, and terms that represent many similar terms are presented. With the p-values, the numbers (#) of cargoes annotated with each of the terms are presented. Total No. represents the number of proteins annotated with …
B. Full table of the GO term enrichments of the 3rd-Z-4% cargoes
The 3rd-Z-4% cargoes were analyzed for GO term enrichment. For all combinations of GO terms and NTRs, the p-values for the term enrichments in the 3rd-Z-4% cargoes and the numbers (#) of cargoes annotated with the terms are presented. The numbers following “# in” are the total numbers of 3rd-Z-4% cargoes. Total No. represents the number of proteins annotated with each term in the database. Cyan, …
C. Full table of the GO term enrichments of the 2nd-Z-15% cargoes
The 2nd-Z-15% cargoes were analyzed and are presented in a manner similar to that in (B). (A) was extracted from this table. This table was derived from Supplementary file 8, and see Supplementary file 8 to retrieve the protein accessions.
(4 sheets including this one)

## Sheet: A. 2nd-Z-15% Summary
GO Biological Process
Term ID	Term Name	Imp-β		Trn-1		Trn-2		Trn-SR		Imp-4		Imp-5		Imp-7		Imp-8		Imp-9		Imp-11		Imp-13		Exp-4		Total No.
		p	#	p	#	p	#	p	#	p	#	p	#	p	#	p	#	p	#	p	#	p	#	p	#
GO:0006278	RNA-Dependent DNA Replication	0.0193	5	1	2	0.0104	5	1	3	1	2	1	3	1	2	1	2	0.263	4	1	2	1	3	0.0132	5	57
GO:0006261	DNA-Dependent DNA Replication	0.000522	8	1	2	1	4	3.13e-05	9	0.0415	6	1	3	1	1			1	3			1	1	1	1	127
GO:0042023	DNA Endoreduplication	1	1	1	1	1	2	0.0192	3																	9
GO:0044728	DNA Methylation or Demethylation	0.0251	6	1	2	1	4	1	1	1	2	1	3	1	3	1	1	1	3	1	1	1	1	1	3	102
GO:0006265	DNA Topological Change					1	1			0.0163	3			1	2	1	1	1	2	1	1					9
GO:0006323	DNA Packaging	0.136	7	1	5	1	5	1	5	0.00519	8	1	6	0.0108	8	1	4	0.00588	8	1	1	0.167	7	0.657	6	200
GO:0032392	DNA Geometric Change	1	3	1	1	1	2			0.386	4	1	2	4.15e-05	7	0.508	4	1	1	1	1	1	1	1	1	63
GO:0000737	DNA Catabolic Process, Endonucleolytic	1	1	1	1					0.00651	4	1	1	1	2			1	1			1	1			23
GO:0006289	Nucleotide-Excision Repair	0.0521	6	1	2	1	3	0.567	5	0.00151	7	1	3	1	2	1	2	0.355	5	1	1	1	4	1	4	116
GO:0006283	Transcription-Coupled Nucleotide-Excision Repair	0.00357	6	1	2	1	2	0.063	5	0.0369	5	1	2			1	2	1	3			1	1	1	2	73
GO:0006302	Double-Strand Break Repair	1	6	1	5	1	5	0.0374	8	0.0133	8	1	3	1	3	1	4	0.136	7	1	5	0.0496	8	1	5	227
GO:0051103	DNA Ligation Involved in DNA Repair							1	1	0.0232	3			1	2			1	1					1	1	10
GO:0006997	Nucleus Organization	4.35e-05	9	0.604	5	0.582	5	0.00849	7	5.13e-07	10	1	3	0.000445	8	1	3	0.626	5	0.626	5	0.124	6	0.0637	6	131
GO:0034728	Nucleosome Organization	0.00496	8	1	3	1	3	1	5	0.22	6	1	3	1	5	1	2	0.0221	7	1	1	0.0621	7	1	5	171
GO:0006337	Nucleosome Disassembly	0.00264	4					1	2	1	2			1	1			1	2			1	2	1	1	17
GO:0031497	Chromatin Assembly	0.332	6	1	4	1	3	1	3	0.163	6	1	4	0.0259	7	1	2	0.174	6	1	1	0.397	6	1	5	162
GO:0031498	Chromatin Disassembly	0.00427	4					1	2	1	2			1	1			1	2			1	2	1	1	19
GO:0016569	Covalent Chromatin Modification	1.58e-05	15	1	8	0.251	9	1.8e-06	16	1	6	1	7	1	7	1	5	1	6	1	5	3.18e-06	16	0.384	9	442
GO:0006338	Chromatin Remodeling	3.74e-08	12	0.115	6	0.11	6	1	4	0.115	6	1	5	1	4	1	3	0.122	6	1	3	1	4	1	3	152
GO:0007004	Telomere Maintenance via Telomerase	0.0148	5	1	1	0.00794	5	1	3	1	2	1	3	1	2	1	2	0.213	4	1	2	1	2	0.0101	5	54
GO:0032201	Telomere Maintenance via Semi-Conservative Replication	0.64	3					0.628	3	0.0127	4	1	1					1	1			1	1			27
GO:0000722	Telomere Maintenance via Recombination	0.879	3					1	2	0.0197	4							1	1			1	1			30
GO:0006367	Transcription Initiation from RNA Polymerase II Promoter	0.00311	10	0.0608	8	0.436	7	0.996	7	6.66e-05	11	1	4	1	4	1	3	1	5	1	3	0.211	8	1	6	279
GO:0098781	ncRNA Transcription	0.00326	5	1	1	1	2	1	3	1	3	1	1	0.00264	5	1	1			1	1	0.00382	5			40
GO:0031047	Gene Silencing by RNA	6.83e-11	14	0.000577	8	0.0986	6	1	4	1	5	1	5	8.36e-05	9	1	5	0.109	6	1	2	1	5	1	4	149
GO:0006370	7-Methylguanosine mRNA Capping	1.08e-10	9	1	2	1	2	1	3	0.0291	4	1	1	1	1	1	1	1	2			1	3			33
GO:0045292	mRNA Cis Splicing, via Spliceosome	2.13e-07	6			0.101	3	0.125	3	1	1	1	2	0.118	3	1	2	0.00138	4			1	2	0.00156	4	16
GO:0000395	mRNA 5'-Splice Site Recognition	1	1			0.701	2	1	1					0.00436	3	0.717	2	0.701	2					0.00414	3	6
GO:0008334	Histone mRNA Metabolic Process	1	2	1	1	0.000118	5	1	1	0.376	3	1	1	0.415	3	0.427	3	0.00787	4	0.367	3			1	2	24
GO:0070935	3'-UTR-Mediated mRNA Stabilization	1	2	0.0679	3	1	2	1	1	1	1	1	2	0.0773	3	1	1	0.0681	3	1	1	1	2	0.000862	4	14
GO:0009451	RNA Modification	0.000491	8	1	3	1	4	0.00656	7	0.506	5	1	2	1	4	1	3	1	4	1	2	1	3	0.604	5	126
GO:0090501	RNA Phosphodiester Bond Hydrolysis	0.518	5	1	2	1	4	0.00317	7	0.0213	6	1	3	0.427	5	1	3	1	3	1	3	1	4	1	3	113
GO:0000291	Nuclear-Transcribed mRNA Catabolic Process, Exonucleolytic	1	1	1	2	0.0246	4			1	2	1	1			1	1					1	1	1	2	32
GO:0000288	Nuclear-Transcribed mRNA Catabolic Process, Deadenylation-Dependent Decay	1	1	0.484	4	0.469	4	1	2	1	2	0.0428	5			1	3			1	2	0.000113	7	1	2	67
GO:0043928	Exonucleolytic Nuclear-Transcribed mRNA Catabolic Process Involved in Deadenylation-Dependent Decay	1	1	1	2	0.0188	4			1	2	1	1			1	1					1	1	1	2	30
GO:0000289	Nuclear-Transcribed mRNA Poly(A) Tail Shortening			1	2			1	2			0.0377	4			1	2			1	2	2.74e-05	6			32
GO:0061157	mRNA Destabilization			1	2	0.0403	3	1	1					1	1											12
GO:0006379	mRNA Cleavage	0.256	3					0.251	3	1	2	1	1	0.0046	4	1	1	1	1	1	1	1	1	1	2	20
GO:0009303	rRNA Transcription	0.000734	5	1	1	1	2	0.862	3	0.74	3	1	1	0.000593	5	1	1			1	1	0.000863	5			30
GO:0000460	Maturation of 5.8S rRNA	1	2	1	2	7.35e-05	5	0.337	3	1	2	1	2			1	2	1	1	1	1			1	1	22
GO:0000470	Maturation of LSU-rRNA	1	1	1	1	1	1	0.000233	4	1	1	1	1	1	1	0.0266	3	1	2	1	2			1	2	10
GO:0042273	Ribosomal Large Subunit Biogenesis	1	3	1	2	1	2	0.000139	6	1	1	1	3	0.000109	6	3.13e-17	13	5.72e-12	10	0.0859	4			0.0963	4	43
GO:0043144	snoRNA Processing	1	1	1	1	0.0104	3	1	2	1	2	1	2					1	1					0.0115	3	8
GO:0002181	Cytoplasmic Translation	1	2	1	3			1	1	1	1	1	2	1	3	1.52e-17	13	0.00213	5	0.071	4	1	2	1	2	41
GO:0002183	Cytoplasmic Translational Initiation	1	1	1	1							1	1	1	1	0.0484	3			1	1					12
GO:0006458	De Novo Protein Folding	1	1	0.0108	5	1	3	1	3	1	2	0.0193	5	1	3	1	2	1	1	0.0113	5	0.000985	6	1	3	57
GO:0061077	Chaperone-Mediated Protein Folding	1	2	1	2	0.00018	6	1.23e-05	7	1	1	0.0111	5	0.212	4	1	3	0.00646	5	1	1	1	2	1	3	51
GO:0000413	Protein Peptidyl-Prolyl Isomerization	1	1	1	2	1	2	0.00714	5	1	3	0.176	4	1	2	1	1	1	2	1	2	1	1	1	1	47
GO:0043623	Cellular Protein Complex Assembly	0.184	11	0.00118	13	0.224	10	1	7	1	7	3.33e-05	16	1	9	1	9	1	6	3.63e-06	16	1.11e-06	18	1	6	540
GO:0051258	Protein Polymerization	1	2	0.00167	9	1	1	1	3	1	1	6.13e-05	11	1	2	1	3	1	1	9.93e-07	12	0.000851	10	1	2	234
GO:0051261	Protein Depolymerization	1	1	1	3	1	1	1	3			1	4	1	1	1	3			3.06e-05	8	1	3	1	1	101
GO:0032446	Protein Modification By Small Protein Conjugation	1	13	1	9	0.235	13	8.93e-09	25	1.6e-05	19	1	12	1	12	1	7	1	11	1	10	1	11	1	9	896
GO:0016567	Protein Ubiquitination	1	6	1	6	1	6	0.000182	18	0.275	12	1	11	1	8	1	5	1	2	1	7	1	8	1	5	784
GO:0006479	Protein Methylation	0.0328	7	1	3	0.147	6	0.0314	7	1	5	1	4	0.242	6	1	3	1	4	1	3	1	4	1	5	160
GO:0016570	Histone Modification	8.12e-05	14	1	8	0.2	9	9.68e-06	15	1	6	1	6	1	6	1	5	1	5	1	5	2.08e-06	16	1	8	429
GO:0016574	Histone Ubiquitination	1	1	1	2	1	2	8.87e-05	6	1	1	1	3	1	1	1	1	1	1	1	1	1	1	1	2	40
GO:0016571	Histone Methylation	0.0868	6	1	3	1	4	0.00692	7	1	3	1	3	1	3	1	1	1	2	1	1	1	3	1	3	127
GO:0006468	Protein Phosphorylation	1	18	0.0227	22	0.198	20	0.282	22	1	13	0.311	22	1	11	1	14	1	13	1	15	0.0238	25	1	15	1849
GO:0006486	Protein Glycosylation	1	6	1	5	1	5	0.109	10	1	4	0.000506	13	1	6	1	5	1	5	1	4	0.000106	14	1	6	424
GO:0006606	Protein Import into Nucleus	3.08e-07	14	6.61e-05	11	1	3	0.153	8	1	3	1	5	0.0149	9	1	3	0.469	7	0.0631	8	4.73e-07	14	1	6	277
GO:0006611	Protein Export from Nucleus	1	3	0.00992	5			1	1	1	3	0.351	4	1	2	1	1	1	1	1	2	0.398	4	1	1	56
GO:0000075	Cell Cycle Checkpoint	1	6	1	3	0.216	7	8.69e-07	13	1	4	1	3	1	5	1	1	1	2	1	2	1	5	1	4	249
GO:0000077	DNA Damage Checkpoint	1	5	1	3	1	3	0.0267	7	1	3	1	2	1	2					1	1	1	2	1	2	156
GO:0044843	Cell Cycle G1/S Phase Transition	1.69e-05	12	1	3	1	4	0.639	7	0.0347	8	1	5	1	3	1	3	1	2	1	3	0.126	8	1	2	259
GO:0044839	Cell Cycle G2/M Phase Transition	0.946	6	0.00478	8	1	3	0.0134	8	0.0505	7	0.0141	8	1	2	1	3	1	1	0.507	6	0.00186	9	1	2	197
GO:0007062	Sister Chromatid Cohesion	0.0047	5	1	3	0.0815	4	1	3	1	2	1	1	1	2	1	1			1	1	1	3	1	2	43
GO:0098813	Nuclear Chromosome Segregation	0.0275	8	0.79	6	0.756	6	2.51e-05	11	0.786	6	1	6	1	6	1	3	1	3	0.831	6	0.00398	9	0.99	6	216
GO:0007077	Mitotic Nuclear Envelope Disassembly	9.84e-08	8	0.0922	4	1	2	0.00512	5	0.00293	5	1	3	0.00429	5	1	2	1	3	1	2	1	2	1	1	44
GO:0007052	Mitotic Spindle Organization	1	4	4.73e-06	8	1	2	0.00634	6	1	4	1	4	1	3	1	1	1	2	1	4	0.000426	7	1	4	81
GO:0007091	Metaphase/Anaphase Transition of Mitotic Cell Cycle					1	1	0.0222	5	1	1	1	1	0.375	4	1	1					1	2	1	2	59
GO:0000910	Cytokinesis	1	5	0.00197	8	1	2	1	3	0.0234	7	0.0584	7	1	2	1	5	1	2	0.266	6	1	3	1	5	175
GO:0048589	Developmental Growth	1	3	0.649	10	1	9	1	8	1	5	0.126	12	1	7	1	10	1	7	0.72	10	0.00156	15	1	8	611
GO:0048646	Anatomical Structure Formation Involved in Morphogenesis	1	10	0.0928	16	1	10	1	13	1	8	1	14	1	12	1	11	1	10	0.000397	20	0.907	16	1	13	1184
GO:0060429	Epithelium Development	1	11	2.64e-05	21	0.621	14	1	11	1	4	1	14	0.611	15	1	12	1	12	0.783	14	5.13e-05	23	0.344	15	1125
GO:0030855	Epithelial Cell Differentiation	1	6	0.000119	15	1	6	1	6	1	3	1	8	0.338	11	1	9	1	9	0.00559	13	0.00819	14	0.971	10	612
GO:0030097	Hemopoiesis	0.811	12	0.802	11	1	9	1	10	1	9	1	8	0.123	13	1	11	0.00189	15	0.0481	13	1	9	1	8	749
GO:0030099	Myeloid Cell Differentiation	0.129	9	1	7	1	5	0.123	9	1	4	1	6	0.517	8	1	6	1	7	0.0446	9	1	6	1	7	346
GO:0061061	Muscle Structure Development	0.419	11	0.00341	13	1	9	0.0189	13	1	8	0.0961	12	0.0558	12	0.31	11	1	9	0.000656	14	3.19e-05	17	1	6	594
GO:0003012	Muscle System Process	1	2	0.12	9	0.0168	10	1	4	1	3	1	6	1	6	1	8	0.772	8	0.772	8	6.04e-06	15	0.0281	10	398
GO:0042692	Muscle Cell Differentiation	1	5	0.0639	9	1	4	1	7	1	4	0.0343	10	1	5	1	6	1	3	0.00129	11	0.00725	11	1	3	367
GO:0051146	Striated Muscle Cell Differentiation	1	3	1	5	1	1	1	5	1	4	0.635	7	1	1	1	4	1	2	0.296	7	0.002	10	1	2	257
GO:0001711	Endodermal Cell Fate Commitment	1	1	1	1	1	1	0.00198	4			1	1	1	1	1	1	1	1	1	1			0.112	3	16
GO:0048732	Gland Development	1	7	1	3	1	7	1	7	1	3	1	5	1	4	1	4	1	5	3.93e-05	14	1	7	1	6	472
GO:0040016	Embryonic Cleavage					1	1	1	1	1	1					1	2	0.0107	3	1	1					8
GO:0009790	Embryo Development	1	14	1	11	1	11	2.38e-05	22	1	11	0.132	16	0.00417	18	0.000302	20	0.0048	17	1	11	1	14	1	12	1030
GO:0009792	Embryo Development Ending in Birth or Egg Hatching	1	10	1	8	1	8	0.000334	16	1	8	0.828	11	0.524	11	0.0322	13	0.246	11	1	9	1	10	1	8	644
GO:0043009	Chordate Embryonic Development	1	9	1	8	1	8	0.00156	15	1	5	0.746	11	1	9	0.131	12	1	9	1	8	1	10	1	6	636
GO:0019827	Stem Cell Population Maintenance	0.00416	8	9.53e-05	9	0.0013	8	0.000333	9	1	4	1	4	1	4	1	4	0.206	6	1	3	0.0534	7	1	5	167
GO:0002520	Immune System Development	0.0118	16	0.139	13	0.526	12	0.634	13	1	11	1	10	0.0247	15	0.0316	15	0.00162	16	0.161	13	1	9	1	10	843
GO:0002200	Somatic Diversification of Immune Receptors	0.0369	5	1	2	0.417	4	0.609	4	0.436	4	1	2	0.546	4	1	1	1	1					1	2	65
GO:0000003	Reproduction	1	17	0.0588	18	1	14	0.000322	24	1	13	1	17	0.0066	21	1	16	1	12	1	11	1	13	1	11	1403
GO:0007565	Female Pregnancy	1	3	1	4	1	2	1	4	1	2	1	1	0.995	6	0.0165	8	1	4	1	3	1	1	1	4	208
GO:0007623	Circadian Rhythm	1	5	1	3	0.000682	9	1	3	0.00801	8	1	1	0.144	7	0.0189	8	1	5	1	4	1	4	0.11	7	212
GO:0097194	Execution Phase of Apoptosis	1	4	1	3	0.00795	6	1	4	2.27e-08	10	1	2	3.92e-05	8	1	4	0.145	5	1	1	1	2	0.0107	6	96
GO:0030262	Apoptotic Nuclear Changes	1	2	1	1	1	2	1	1	6.59e-06	6	1	1	0.0251	4	1	1	0.724	3			1	1	1	2	30
GO:0006309	Apoptotic DNA Fragmentation	1	1	1	1					0.00228	4	1	1	1	2			1	1			1	1			18
GO:0008637	Apoptotic Mitochondrial Changes	0.657	5	0.0289	6	1	2	1	4	1	3	1	4	1	3	1	4	1	2	1	3	1	3			119
GO:0036473	Cell Death in Response to Oxidative Stress	0.554	4	1	3	1	3	1	2	1	2	1	3	1	3	0.508	4	1	3	1	1	0.0018	6	1	2	63
GO:0009991	Response to Extracellular Stimulus	1	8	1	9	1	9	0.0444	12	0.0516	11	0.957	10	1	9	0.000175	15	0.0619	11	1	8	0.00249	14	0.429	10	552
GO:0009408	Response to Heat	1.3e-07	12	1	4	9.85e-05	9	0.00432	8	1	4	1	2	0.00309	8	0.357	6	0.22	6	1	2	1	3	1	5	169
GO:0009314	Response to Radiation	1	5	1	7	1	6	1	8	1	7	0.524	10	1	5	1	8	1	6	1	4	0.000163	15	1	3	511
GO:0009611	Response to Wounding	0.716	15	6.36e-08	24	1	13	1	13	1	10	0.00465	19	1	14	1	13	1	13	0.00201	18	1.92e-07	26	0.749	14	1078
GO:0051707	Response to Other Organism	0.00015	20	0.112	14	0.103	14	2.91e-08	25	1	9	0.18	15	0.00128	18	0.00038	19	0.507	13	0.507	13	0.856	14	1	11	947
GO:0031667	Response to Nutrient Levels	1	8	0.914	9	1	8	0.128	11	0.0308	11	0.619	10	1	9	8.49e-05	15	0.202	10	1	8	0.00729	13	0.273	10	522
GO:0071214	Cellular Response to Abiotic Stimulus			1	5	1	1	1	4	1	4	0.00559	10	1	4	1	7	1	2	1	4	0.00748	10	1	1	298
GO:0034599	Cellular Response to Oxidative Stress	0.315	7	0.0146	8	0.128	7	1	4	1	4	1	4	1	5	0.261	7	1	6	1	3	0.000698	10	1	6	229
GO:0010035	Response to Inorganic Substance	0.13	11	1.83e-07	17	0.161	10	0.0243	12	1	6	0.13	11	1	6	1	9	0.0352	11	0.193	10	0.173	11	1	9	519
GO:0010243	Response to Organonitrogen Compound	0.317	15	0.0491	15	0.18	14	0.00572	18	1	7	0.0912	16	0.045	16	1	13	1	10	1	9	1	13	1	12	998
GO:0042493	Response to Drug	1	8	1	7	0.0477	10	0.847	9	1	8	0.889	9	1	8	0.000634	13	0.0574	10	1	7	1	6	1	4	449
GO:0010038	Response to Metal Ion	1	5	7.38e-06	13	1	7	0.731	8	1	3	0.765	8	1	3	1	5	1	5	1	7	0.95	8	1	6	349
GO:0033993	Response to Lipid	0.27	14	1	10	0.00917	15	2.03e-07	23	1	11	1	5	1	12	0.669	13	0.228	13	0.0122	15	1	9	1	12	873
GO:0034097	Response to Cytokine	0.000799	18	0.694	12	1	10	0.0144	16	0.163	13	1	12	1	11	1	12	0.201	13	1	9	1	13	1	10	862
GO:0070848	Response to Growth Factor	0.649	14	0.463	13	0.109	14	0.00297	18	1	12	1	10	1	8	1	12	1	8	0.14	14	2.33e-06	23	1	7	952
GO:0006955	Immune Response	0.33	21	0.0876	20	1	13	0.0366	23	0.245	19	1.76e-06	31	1	16	1	13	1	13	1	16	0.192	22	1	14	1728
GO:0002252	Immune Effector Process	0.103	14	0.0033	15	1	10	0.366	13	1	8	4.8e-05	19	0.225	13	1	12	1	8	1	11	0.00877	16	1	9	796
GO:0007167	Enzyme Linked Receptor Protein Signaling Pathway	0.425	17	0.000819	20	1	13	0.126	18	1	13	0.000867	22	1	10	0.837	16	0.77	15	5.24e-05	22	3.45e-14	37	1	11	1261
GO:0007178	Transmembrane Receptor Protein Serine/Threonine Kinase Signaling Pathway	1	5	1	3	1	6	1	6	0.274	8	1	4	1	3	1	4	1	5	1	7	0.00424	11	1	5	347
GO:0007169	Transmembrane Receptor Protein Tyrosine Kinase Signaling Pathway	1	12	0.00119	17	1	9	1	12	1	5	0.00295	18	1	7	1	13	1	10	0.00706	16	1.77e-09	27	1	7	945
GO:0016055	Wnt Signaling Pathway	1	7	1	6	1	5	0.0216	11	1	6	1	7	1	6	1	3	1	4	0.0389	10	1	5	1	7	429
GO:0019221	Cytokine-Mediated Signaling Pathway	0.00561	14	1	9	1	6	0.00519	14	1	9	1	10	1	5	1	5	1	5	1	6	1	9	1	3	612
GO:0030522	Intracellular Receptor Signaling Pathway	1	5	1	5	1	5	0.316	8	1	2	1	5	1	4	1	4	1	5	1	4	0.000163	12	1	5	308
GO:0007249	I-KappaB Kinase/NF-KappaB Signaling			0.29	7	1	1	1	4	1	2	1	4	1	3	1	4	1	1	1	6	0.000239	11	1	2	259
GO:0002431	Fc Receptor Mediated Stimulatory Signaling Pathway	1	1	0.000487	7	1	1	1	2			3.34e-06	9	1	2	1	3	1	1	0.000527	7	0.024	6	1	1	98
GO:0051014	Actin Filament Severing			0.0159	3							1	2							1	1	1	2	1	2	9
GO:0030048	Actin Filament-Based Movement	1	1	1	4	1	4	1	2	1	2	0.518	5	0.427	5	0.458	5	1	3	1	4	0.00412	7	1	4	113
GO:0030036	Actin Cytoskeleton Organization	1	2	6.38e-09	19	1	3	0.224	11	1	3	2.3e-14	26	1	4	1	9	1	3	4.79e-15	25	5.16e-14	26	1	7	556
GO:0051693	Actin Filament Capping			1	1	1	1	1	1							1	1			0.000943	5			1	1	35
GO:0045010	Actin Nucleation	1	1	0.00561	5			1	2	1	1	1.12e-05	7	1	1	1	2			0.157	4	1.4e-05	7	1	1	50
GO:0034314	Arp2/3 Complex-Mediated Actin Nucleation	1	1	0.0459	4			1	2	1	1	1.22e-06	7	1	1	1	2			0.0469	4	1.53e-06	7			37
GO:0016311	Dephosphorylation	1	7	1	4	1	2	0.133	10	1	7	1	5	1	2	1	1	1	2	1	6	0.0347	11	1	5	434
	No. in Top 15%	303		247		246		302		244		300		284		289		253		250		309		262
GO Cellular Component
Term ID	Term Name	Imp-β		Trn-1		Trn-2		Trn-SR		Imp-4		Imp-5		Imp-7		Imp-8		Imp-9		Imp-11		Imp-13		Exp-4		Total No.
		p	#	p	#	p	#	p	#	p	#	p	#	p	#	p	#	p	#	p	#	p	#	p	#
GO:0000793	Condensed Chromosome	0.00109	9	0.407	6	1	5	0.00103	9	2.02e-05	10	1	3	5.66e-05	10	1	5	1	5	1	4	1	5	1	3	191
GO:0000779	Condensed Chromosome, Centromeric Region	1	3	1	3	1	1	0.0241	6	0.186	5	1	2	0.264	5	1	2	1	1	1	2	1	2	1	2	102
GO:0000781	Chromosome, Telomeric Region	1	5	1	3	1	4	0.99	5	1	3	1	5	1	3	1	2	0.626	5	1	1	1	4	0.00478	7	131
GO:0000777	Condensed Chromosome Kinetochore	1	3	1	3	1	1	0.0133	6	0.114	5	1	2	0.162	5	1	2	1	1	1	2	1	2	1	2	92
GO:0000790	Nuclear Chromatin	5.12e-08	15	1	4	0.00102	10	1	5	0.0799	8	0.225	8	1	6	1	3	0.634	7	1	3	1	5	1	6	291
GO:0000792	Heterochromatin	0.0568	5	1	3	0.0309	5	1	3	0.614	4	1	3	1	3	1	1	0.618	4			1	1	0.69	4	71
GO:0035327	Transcriptionally Active Chromatin	0.298	3	1	2	0.00423	4	1	1	1	2	1	1	1	2	1	1	1	1	1	1	1	1	1	2	21
GO:0000776	Kinetochore	0.584	5	0.342	5	1	1	0.00378	7	0.0247	6	1	3	0.0402	6	1	2	1	2	1	2	0.0626	6	1	3	116
GO:0008280	Cohesin Core Heterodimer			1	1	0.0472	2	0.048	2																	2
GO:0005813	Centrosome	1	9	0.0839	10	1	5	6.53e-07	17	0.45	9	0.011	12	1	5	1	9	1	5	1	6	1	9	1	8	476
GO:0072686	Mitotic Spindle	1	1	0.000147	6			1	2	1	1	0.208	4			1	2			0.00528	5	1	3			49
GO:0000922	Spindle Pole	1	1	1	4	1	1	0.000263	8	1	1	1	2	1	2	1	3	1	1	1	2	1	3	1	1	117
GO:0070603	SWI/SNF Superfamily-Type Complex	0.00015	7	1	2	0.0331	5	0.9	4	0.648	4	1	2	1	1	1	1	1	3	1	1	1	4	1	1	72
GO:0000118	Histone Deacetylase Complex	1	3	0.00507	5	1	3	1	3	1	1	1	3	1	1	1	1			1	3	1	1	1	1	49
GO:0005667	Transcription Factor Complex	0.000698	11	1	6	0.0916	8	1	7	0.0946	8	1	5	0.187	8	1	7	0.106	8	1	1	0.000114	12	1	5	298
GO:0090575	RNA Polymerase II Transcription Factor Complex	0.0011	7	1	4	0.134	5	1	3	1	4	1	4	1	4	0.213	5	1	4			0.00137	7	1	2	96
GO:0000428	DNA-Directed RNA Polymerase Complex	9.1e-07	10	1	3	1	4	3.98e-08	11	0.0273	6	1	3	1	3	1	3	1	4	1	1	0.0689	6	1	4	118
GO:0016602	CCAAT-Binding Factor Complex	1	1	1	1	1	1					1	1			1	1	1	1			0.00105	3			4
GO:0005674	Transcription Factor TFIIF Complex	0.0487	2			1	1	0.048	2	0.0498	2			1	1			1	1			1	1			2
GO:0005675	Holo TFIIH Complex	0.0383	3					1	2	1	1	1	1			1	1	1	2			1	1			11
GO:0008023	Transcription Elongation Factor Complex	1	2	1	1	1	1	0.00455	5	1	1	1	3	1	1	1	1	1	2	1	2	1	1	0.0963	4	43
GO:0016593	Cdc73/Paf1 Complex	1	1	1	1	1	1	3.94e-05	4			1	1	1	1	1	1	1	1	1	1			0.00722	3	7
GO:0016442	RISC Complex			1	1							1	2	1	1	1	2					0.0308	3			10
GO:0005845	mRNA Cap Binding Complex	0.000561	4																			0.0561	3			12
GO:0000974	Prp19 Complex	0.0383	3			0.0303	3	0.0375	3	1	1			1	1	1	2	1	1					1	1	11
GO:0034715	pICln-Sm Protein Complex					1.11e-05	4			0.00391	3			0.714	2	0.717	2	1.18e-05	4	1	1	1	1	0.723	2	6
GO:0097526	Spliceosomal tri-snRNP Complex			1	1	1.81e-10	8	1	2	0.426	3	1	1	0.0118	4	0.484	3	2.37e-08	7	1	1	1	1	0.448	3	25
GO:0005682	U5 snRNP	1	2	1	1	1.38e-07	6	1	1	0.00178	4	1	1	0.143	3	0.147	3	1.55e-07	6	1	1	0.17	3	2.24e-05	5	17
GO:0000178	Exosome (RNase Complex)	1	1	1	2	0.00171	4			1	2	1	1											1	2	17
GO:0035145	Exon-Exon Junction Complex							1	2			1	2							1	2	0.0422	3			11
GO:0005847	mRNA Cleavage And Polyadenylation Specificity Factor Complex	1	1					1	2	1	1			0.000124	4	1	1	1	1	1	1			1	2	9
GO:0000932	Cytoplasmic mRNA Processing Body			1	2	1	2	1	3	1	1	0.973	4	1	1	0.0572	5	1	1	1	2	0.00432	6			73
GO:0010494	Cytoplasmic Stress Granule	1	2	0.877	3	1	1	1	2	1	1	4.06e-07	7	0.000831	5	4.68e-09	8			1	1	0.00121	5	1	2	32
GO:0000346	Transcription Export Complex	1	2	1	1	1	1	0.000233	4			1	1	1	1	1	1							1	2	10
GO:0034708	Methyltransferase Complex	1	4	1	2	0.000134	7	1	4	1.6e-07	9	1	2	1	4	0.1	5	0.000153	7	0.0677	5	1	2	0.000195	7	82
GO:0032040	Small-Subunit Processome	0.00121	5	1	1	0.939	3	0.0416	4	0.0291	4	1	3	1	2	1	3	2.68e-09	8			1	3	1	2	33
GO:0031428	Box C/D snoRNP Complex			1	1	0.701	2	0.711	2	0.739	2	1	1	1	1	1	1	0.00384	3					0.00414	3	6
GO:0005844	Polysome	1	1	1	3	1	1	1	1			0.0608	4	1	3	0.0556	4	1	2	1	3	0.00223	5	1	1	36
GO:0009328	Phenylalanine-tRNA Ligase Complex			1	1							1	1							0.0472	2					2
GO:0070993	Translation Preinitiation Complex	1	1									2.38e-05	5	1	1	1.77e-07	6					0.141	3			16
GO:0005853	Eukaryotic Translation Elongation Factor 1 Complex			7.72e-07	4							1.17e-06	4			0.289	2			0.000772	3	0.00105	3			4
GO:0008287	Protein Serine/Threonine Phosphatase Complex	1	2	1	1	1	1	4.95e-06	7	1	2	1	2					1	1	1	2	1	2			45
GO:1990204	Oxidoreductase Complex	0.0237	6	1	1	1	1	1	1	1	1	1	4	1	4	1	1	1	1	1	1	1	3	1	2	101
GO:0005874	Microtubule	0.247	9	1.72e-07	15	1	4	1	7	1	5	0.0431	10	1	5	1	5	1	4	0.00168	11	0.000193	13	0.115	9	377
GO:0005885	Arp2/3 Protein Complex			0.000372	4			1	1			2.5e-08	6	1	1	1	2			0.000381	4	3.04e-08	6			12
GO:0032432	Actin Filament Bundle			0.000239	6	1	1			1	1	0.0135	5			1	1	1	1	3.19e-09	9	3.35e-10	10			53
GO:0030863	Cortical Cytoskeleton	1	1	7.39e-08	9			1	1	1	1	2.94e-07	9			1	1			2.2e-09	10	3.78e-10	11	1	1	75
GO:0030017	Sarcomere			0.032	7	1	2	1	3			0.00819	8	1	2	1	1	1	2	0.000235	9	8.66e-05	10	1	1	183
GO:0099568	Cytoplasmic Region	1	3	6.59e-14	18	1	2	0.504	7	1	3	7.54e-08	14	1	1	1	2			1.45e-07	13	6.36e-10	16	1	3	249
GO:0005911	Cell-Cell Junction	1	3	0.571	8	1	4	0.274	9	1	2	0.00124	12	1	6	1	3	1	4	0.618	8	1	8	1	5	385
GO:0045202	Synapse	1	3	1	10	1	7	1	9	1	8	0.0364	14	1	7	1	8	1	6	1	7	0.012	15	1	6	723
GO:0032153	Cell Division Site	1	1	1	3			1	1	1	3	1	2	1	1	0.223	4	1	2	0.17	4	0.013	5	1	1	51
GO:0005811	Lipid Particle	1	3	1	1	1	3	1	3	1	3	0.402	4	0.000685	6	0.000758	6	0.0123	5	1	1	1	2	0.315	4	58
GO:0005773	Vacuole	1	6	0.123	11	1	6	1	3	1	2	1	10	1	9	0.0799	12	1	1	1	6	0.00135	15	1	4	604
GO:0005791	Rough Endoplasmic Reticulum	0.785	4	1	1	0.00113	6	1	2	1	2	1	2	0.0404	5	0.0435	5	1	3			1	2	0.618	4	69
GO:0044440	Endosomal Part	1	5	1	5	1	6	1	6	0.175	9	6.25e-05	14	0.0679	10	4.75e-06	15	1	4	0.0324	10	0.0257	11	0.262	9	420
GO:0044431	Golgi Apparatus Part	1	7	1	7	1	11	0.255	14	1	7	4.08e-05	20	0.0375	15	0.0115	16	1	6	1	7	0.0068	17	1	10	874
GO:0044433	Cytoplasmic Vesicle Part	1	5	1	7	1	8	1	9	1	4	1.38e-07	19	0.669	10	0.00118	14	1	7	1	6	0.316	11	1	8	556
GO:0044455	Mitochondrial Membrane Part	0.089	7	1	1	1	3	1	4	1	4	1	1	0.000584	9	1	4	1	3	1	4	1	2	0.000385	9	187
GO:0044425	Membrane Part	1	46	1	34	1	46	1	51	1	42	1	53	8.81e-05	64	0.0226	58	1	38	1	45	0.379	57	0.0141	55	6915
GO:0098796	Membrane Protein Complex	0.264	15	1	10	0.572	13	1	10	0.0369	15	0.264	15	0.494	14	1	10	1	11	0.711	13	0.00784	18	0.00019	19	981
GO:0005905	Coated Pit	1	2	1	2	1	2	1	1	1	3	1	2	0.455	4	0.00113	6	1	2	1	2	1	1	0.408	4	62
GO:0044463	Cell Projection Part	1	4	0.561	13	1	6	1	13	1	10	0.789	14	1	11	0.549	14	1	8	0.00217	17	0.00165	19	1	9	971
	No. in Top 15%	303		247		246		302		244		300		284		289		253		250		309		262
GO Molecular Function
Term ID	Term Name	Imp-β		Trn-1		Trn-2		Trn-SR		Imp-4		Imp-5		Imp-7		Imp-8		Imp-9		Imp-11		Imp-13		Exp-4		Total No.
		p	#	p	#	p	#	p	#	p	#	p	#	p	#	p	#	p	#	p	#	p	#	p	#
GO:0000217	DNA Secondary Structure Binding									0.154	3			0.00292	4	1	1	1	1							18
GO:0000400	Four-Way Junction DNA Binding									0.0109	3			6.94e-05	4	1	1	1	1							8
GO:0008301	DNA Binding, Bending					1	2			0.00359	4	1	1	0.237	3			1	2							20
GO:0097100	Supercoiled DNA Binding	1	1			1	1			0.297	2			0.000879	3			1	1					1	1	4
GO:1990837	Sequence-Specific Double-Stranded DNA Binding	0.000739	16	1	9	0.0133	13	1	10	1	10	1	10	0.2	12	0.241	12	0.0171	13	1	4	1	10	1	8	679
GO:0004003	ATP-Dependent DNA Helicase Activity			1	1	1	2			1	1	1	2	0.816	3	0.0264	4	1	1	1	1	1	1	1	1	30
GO:0016779	Nucleotidyltransferase Activity	1.87e-05	9	1	2	1	3	0.058	6	0.0018	7	1	4	1	2	1	2	1	1	1	1	0.0723	6	1	1	119
GO:0031490	Chromatin DNA Binding	9.06e-05	7	1	1	0.469	4	1	1	0.0242	5	1	2	1	2			0.0252	5	1	1	1	3	0.551	4	67
GO:0070034	Telomerase RNA Binding	1	2			0.000724	4	1	1	1	2	1	1	0.0773	3	0.0796	3	0.000766	4	1	1			7.34e-06	5	14
GO:0042393	Histone Binding	4.9e-05	10	1	4	1	4	1	4	1	4	0.0651	7	1	3	1	2	1	5	1	3	1	4	0.0359	7	178
GO:0042826	Histone Deacetylase Binding	0.0329	6	1	4	0.225	5	1	3	1	2	1	2	1	3	1	3	0.242	5	1	2	1	2	0.0201	6	107
GO:0003700	Transcription Factor Activity, Sequence-Specific DNA Binding	0.0168	19	1	11	1	13	1	11	1	8	1	8	0.318	16	1	11	1	12	1	4	1	8	1	7	1180
GO:0001046	Core Promoter Sequence-Specific DNA Binding	0.368	5	1	2	1	4	1	2	0.214	5	1	2	1	2	1	4	0.0149	6	1	2	0.428	5	1	3	105
GO:0003714	Transcription Corepressor Activity	0.000372	10	1	3	1	3	1	5	0.888	6	1	2	1	6	1	6	1	3	1	4	0.041	8	1	1	221
GO:0003899	DNA-Directed RNA Polymerase Activity	0.00286	5	1	2	1	2	1	2	1	2			1	1	1	1	1	1			1	1			39
GO:0001099	Basal RNA Polymerase II Transcription Machinery Binding	1	1			1	2	2.05e-08	7			1	2	1	2	1	1	0.281	3			1	1	0.303	3	22
GO:0000993	RNA Polymerase II Core Binding	1	1			1	1	0.00149	4			1	1	1	2	1	1					1	1	1	2	15
GO:0050733	RS Domain Binding	1	1	1	1	0.701	2	1	1	0.739	2			0.714	2	0.717	2	0.00384	3	1	1			0.723	2	6
GO:0017091	AU-Rich Element Binding	1	2	0.322	3	9.35e-05	5	1	2	1	2	1	2	0.00831	4	1	2	0.00658	4	1	1	1	1	0.00739	4	23
GO:0008187	Poly-Pyrimidine Tract Binding	1	1	1	2	1	2			1	2	1	1	1	2	1	1	0.0018	4					0.00203	4	17
GO:0030620	U2 snRNA Binding					0.701	2			0.739	2			0.00436	3	0.0045	3	0.00384	3	0.701	2			0.00414	3	6
GO:0035613	RNA Stem-Loop Binding			1	1	1	1	1	2	1	1	1	1	6.94e-05	4	7.33e-05	4	1	2	1	2			1	2	8
GO:0035614	snRNA Stem-Loop Binding							1	1	1	1			0.0482	2	0.0484	2	0.0472	2					1	1	2
GO:0004532	Exoribonuclease Activity			1	2	0.0104	4	1	2	1	2	1	1	1	1			1	1			1	1	1	1	26
GO:0043022	Ribosome Binding			0.0765	4	1	2					0.00417	5	1	1	1	3			1	3	3.92e-06	7			42
GO:0019843	rRNA Binding	1	3	1	1			1	3	1	2	1	1	1	1	1.19e-05	7	0.00713	5	1	2	1	2	1	2	52
GO:0030515	snoRNA Binding	1	2	1	1	1	2	0.0112	4	0.376	3	1	2	0.415	3	0.0105	4	1	2					0.00015	5	24
GO:0000049	tRNA Binding	1	1	0.00329	5					1	2	1	2			1	2	1	1	1	2	1	3	1	1	45
GO:0003743	Translation Initiation Factor Activity	1	3	0.00368	5			1	3	1	1	1.59e-18	14	1	1	2.13e-09	9			1	2	2.53e-18	14			46
GO:0031369	Translation Initiation Factor Binding			1	2	1	1	1	1			0.0188	4	1	2	1	1	1	1	1	1	0.705	3			27
GO:0003746	Translation Elongation Factor Activity			2.97e-08	7	1	1			1	1	9.37e-10	8	1	1	1	2	1	1	0.011	4	7.14e-06	6			26
GO:0008312	7S RNA Binding	1	1			0.0104	3			1	1					1	1									8
GO:0003755	Peptidyl-Prolyl Cis-Trans Isomerase Activity	1	1	1	2	1	2	0.00714	5	1	3	0.176	4	1	2	1	1	1	2	1	2	1	1	1	1	47
GO:0051082	Unfolded Protein Binding	1	4	0.0119	6	0.179	5	0.311	5	1	2	1	4	0.264	5	1	4	0.000694	7	1	4	0.0302	6	0.0152	6	102
GO:0031072	Heat Shock Protein Binding	1	2	0.108	5	0.104	5	0.0125	6	1	3	1	4	1	2	1	2	1	3	1	2	0.00095	7	1	3	91
GO:0019789	SUMO Transferase Activity													1	1							0.0422	3			11
GO:0031625	Ubiquitin Protein Ligase Binding	1	3	1	5	1	5	1	2	0.00384	9	0.681	7	1	4	0.566	7	1	5	1	3	0.129	8	1	5	260
GO:0051427	Hormone Receptor Binding	0.0628	7	1	5	9.53e-06	10	0.0602	7	1	4	1	3	0.00436	8	1	2	1	5	1	5	0.0773	7	1	4	177
GO:0008168	Methyltransferase Activity	0.0209	8	1	2	1	4	1	4	1	2	1	3	1	2			0.679	6	1	3	1	4	1	1	208
GO:0016301	Kinase Activity	1	8	1	7	1	9	0.00529	16	1	8	0.103	14	1	7	1	8	1	3	1	9	1	10	1	4	796
GO:0005080	Protein Kinase C Binding			0.00561	5	1	2	1	1			1	3	1	1	1	1	1	1	1	3	0.0118	5	1	1	50
GO:0019208	Phosphatase Regulator Activity	1	4	1	2	1	3	0.0133	6	1	1	1	3	1	1			1	1	0.118	5	1	4			92
GO:0030291	Protein Serine/Threonine Kinase Inhibitor Activity			0.0169	4	1	1			1	2	1	1			1	1			1	1	0.874	3			29
GO:0044548	S100 Protein Binding			0.000536	4	1	1															1	2			13
GO:0005200	Structural Constituent of Cytoskeleton			4.92e-08	10	1	3	1	2	1	4	1.16e-11	13	1	3	1	2	1	1	3.58e-05	8	6.94e-06	9	0.235	5	103
GO:0015631	Tubulin Binding	0.164	8	0.449	7	1	2	0.0222	9	1	3	1	6	1	4	1	6	1	6	1	4	1	6	1	3	278
GO:0017022	Myosin Binding	1	1	1	3	1	2			1	3	0.000904	6	0.351	4	0.0185	5	1	1	1	1	0.456	4	1	2	58
GO:0003779	Actin Binding	1	2	2.38e-07	15	1	5	1	3	1	3	2.74e-09	18	1	4	1	6	1	4	6.37e-14	21	2.63e-13	22	1	3	386
GO:0017016	Ras GTPase Binding	1	4	1	6	1	3	1	6	1	6	0.0393	8	1	5	1	4	1	2	1	6	0.00598	9	1	3	227
	No. in Top 15%	303		247		246		302		244		300		284		289		253		250		309		262

## Sheet: B. 3rd-Z-4% GO
#	Term Type	Term ID	Term Name	Term Depth	Imp-β		Trn-1		Trn-2		Trn-SR		Imp-4		Imp-5		Imp-7		Imp-8		Imp-9		Imp-11		Imp-13		Exp-4		Total No.
					p-value	# in 63	p-value	# in 49	p-value	# in 50	p-value	# in 63	p-value	# in 49	p-value	# in 62	p-value	# in 58	p-value	# in 60	p-value	# in 53	p-value	# in 52	p-value	# in 66	p-value	# in 49
1	BP	GO:0008150	biological_process	1	1.03e-23	57	2.59e-21	46	1.42e-20	47	8.81e-26	59	6.19e-24	48	2.16e-29	61	1.01e-26	56	4.99e-30	59	1.42e-25	51	3.39e-22	50	8.22e-26	61	6.19e-24	48	16994
2	BP	GO:0023052	signaling	2	1	12	1	10	1	10	0.027	19	1	10	1	16	0.0252	18	0.000477	21	1	10	0.0251	17	1	16	0.56	14	6347
3	BP	GO:0032502	developmental process	2	0.409	16	0.0102	16	0.366	14	0.156	17	0.276	14	1	14	0.00986	18	4.82e-06	23	1	13	7.08e-05	20	0.0201	19	0.00289	17	5934
4	BP	GO:0098727	maintenance of cell number	3	1	2	1	2	1	2	1	1	1	1	1	1			1	3			1	1	1	1	1	1	170
5	BP	GO:0048856	anatomical structure development	3	1	12	0.0566	14	0.102	14	0.503	15	1	10	1	11	0.00872	17	3.15e-06	22	1	12	9.51e-06	20	0.231	16	0.329	13	5272
6	BP	GO:1904888	cranial skeletal system development	4																			1	1					55
7	BP	GO:0060021	palate development	4																							1	1	85
8	BP	GO:0009888	tissue development	4	1	4	1	2	1	4	1	7			1	5	1	5	1	5	1	3	1	6	1	6	1	5	1807
9	BP	GO:0007492	endoderm development	5					1	1	1	1											1	1			1	1	80
10	BP	GO:0060537	muscle tissue development	5	1	1					1	2			1	3					1	1			1	1	1	1	362
11	BP	GO:0014706	striated muscle tissue development	6	1	1					1	2			1	3					1	1			1	1	1	1	348
12	BP	GO:0061448	connective tissue development	5	1	2									1	1	1	2	1	1	1	2	1	1			1	1	245
13	BP	GO:0060429	epithelium development	5	1	2	1	1	1	2	1	3			1	2	1	3	1	4	1	2	1	4	1	4	1	2	1125
14	BP	GO:0003158	endothelium development	6							1	1			1	1	1	1					1	2			1	1	115
15	BP	GO:0008544	epidermis development	6	1	1			1	1	1	2			1	1									1	2			318
16	BP	GO:0009653	anatomical structure morphogenesis	3	1	2	1	6	1	3	1	10	1	4	1	2	1	2	1	7	1	3	0.23	10	1	7	1	3	2805
17	BP	GO:0048646	anatomical structure formation involved in morphogenesis	3	1	2	1	1	1	1	1	2	1	1			1	2	1	3	1	2	1	2	1	1	1	3	1184
18	BP	GO:0040007	growth	2	1	3			1	2	1	3	1	1	1	1	1	1	1	4	1	3	1	3	1	2	1	3	1004
19	BP	GO:0051179	localization	2	0.952	15	1	10	0.0132	16	5.39e-05	22	0.0094	16	0.00137	20	0.027	17	1.15e-14	32	2.84e-05	20	1.93e-10	26	0.000642	21	0.00181	17	5739
20	BP	GO:0051674	localization of cell	3	1	3					1	2	1	2	1	2	1	3	1	6	1	2	1	4	1	3	1	2	1320
21	BP	GO:0051234	establishment of localization	3	1	12	1	9	0.00562	15	5.46e-05	20	0.00404	15	0.143	15	0.0433	15	4.52e-16	31	0.000311	17	2.21e-10	24	0.0143	17	0.00404	15	4711
22	BP	GO:0006810	transport	4	1	10	1	9	0.00386	15	0.101	15	0.0153	14	0.101	15	0.0303	15	1.89e-16	31	0.000201	17	1.14e-10	24	0.00955	17	0.00277	15	4571
23	BP	GO:0071702	organic substance transport	5	1	9	1	8	0.000239	13	0.747	10	0.0669	10	0.000792	14	0.000226	14	3.7e-18	27	4.87e-05	14	4.86e-10	19	0.224	11	0.00142	12	2637
24	BP	GO:0071705	nitrogen compound transport	5	0.0356	7	0.069	6	0.979	5	0.00394	8	1	1	1	5	0.0217	7	0.0253	7	1	1	1	5	1	4	0.854	5	807
25	BP	GO:0015931	nucleobase-containing compound transport	6	0.0001	6	1.79e-05	6	0.00109	5	6.4e-08	8			0.00408	5	6.37e-05	6	7.28e-05	6	1	1	0.0473	4	0.124	4	0.000947	5	194
26	BP	GO:0050657	nucleic acid transport	7	3.31e-05	6	5.87e-06	6	0.000435	5	1.43e-08	8			0.00163	5	2.1e-05	6	2.4e-05	6	1	1	0.0228	4	0.06	4	0.000376	5	161
27	BP	GO:0016192	vesicle-mediated transport	5			1	2	1	3	1	3	0.216	7	1	4	1	3	1.1e-07	14	1	2	0.363	7	1	5	1	4	1400
28	BP	GO:0006897	endocytosis	6			1	2	1	1	1	2	0.0219	6	1	4	1	3	0.00557	7	1	1	1	3	1	2	1	2	639
29	BP	GO:0006898	receptor-mediated endocytosis	7			1	2			1	2	1	3	1	1	1	1	1	3	1	1	1	1	1	1	1	1	301
30	BP	GO:0072583	clathrin-mediated endocytosis	8			1	1					1	1															55
31	BP	GO:0006907	pinocytosis	7											1	1													17
32	BP	GO:1901998	toxin transport	5									1	1															40
33	BP	GO:0098657	import into cell	5									1	1															44
34	BP	GO:0033036	macromolecule localization	3	0.213	11	0.498	9	5.97e-05	14	5.51e-07	18	0.00271	12	4.6e-06	17	6.58e-05	15	3.08e-16	26	1.33e-06	16	3.53e-14	23	0.0158	13	4.65e-06	15	2805
35	BP	GO:0010876	lipid localization	4					1	1			1	3	1	1	1	3	1	3	1	1	1	2			1	1	343
36	BP	GO:0006403	RNA localization	4	2.54e-06	7	3.38e-07	7	2.59e-05	6	1.24e-09	9			0.000125	6	1.5e-06	7	7.51e-05	6	1	3	0.0483	4	0.127	4	2.19e-05	6	195
37	BP	GO:0090670	RNA localization to Cajal body	5	1	1					1	1																	16
38	BP	GO:0090672	telomerase RNA localization	5	1	1					1	1																	16
39	BP	GO:0090671	telomerase RNA localization to Cajal body	6	1	1					1	1																	16
40	BP	GO:0048254	snoRNA localization	5											1	1											1	1	4
41	BP	GO:0051236	establishment of RNA localization	5	3.57e-05	6	6.32e-06	6	0.000462	5	1.58e-08	8			0.00173	5	2.26e-05	6	2.58e-05	6	1	1	0.0239	4	0.063	4	0.0004	5	163
42	BP	GO:0050658	RNA transport	6	3.31e-05	6	5.87e-06	6	0.000435	5	1.43e-08	8			0.00163	5	2.1e-05	6	2.4e-05	6	1	1	0.0228	4	0.06	4	0.000376	5	161
43	BP	GO:1990428	miRNA transport	7			1	1	1	1																			1
44	BP	GO:0051028	mRNA transport	7	1.15e-05	6	0.000135	5	0.00929	4	3.46e-09	8			0.000682	5	7.29e-06	6	8.35e-06	6	1	1	0.426	3	0.0301	4	0.000156	5	135
45	BP	GO:0008104	protein localization	4	1	7	1	2	1	7	0.0791	11	0.219	9	0.0138	12	1	6	1.42e-10	20	0.000168	13	1.27e-10	19	1	9	0.219	9	2445
46	BP	GO:0031503	protein complex localization	5																			1	1					108
47	BP	GO:0008105	asymmetric protein localization	5															0.325	2			1	1					20
48	BP	GO:0061467	basolateral protein localization	6															1	1									1
49	BP	GO:0045176	apical protein localization	6															1	1			1	1					13
50	BP	GO:0045184	establishment of protein localization	5	1	6	1	2	1	7	1	6	0.327	8	0.0816	10	1	6	3.73e-12	20	1.71e-05	13	1.35e-08	16	1	7	1	7	2012
51	BP	GO:0015031	protein transport	5	1	5	1	2	1	7	1	3	1	7	0.258	9	1	6	1.38e-11	19	6.82e-06	13	5.87e-08	15	1	7	1	7	1862
52	BP	GO:0051641	cellular localization	3	0.0934	12	1	8	0.00832	12	1.56e-05	17	0.0396	11	0.00435	14	1	10	5.82e-12	23	0.000287	14	0.00036	14	0.00128	15	0.00633	12	3044
53	BP	GO:0071166	ribonucleoprotein complex localization	4	0.00011	5	0.114	3	1	2	2.32e-10	8			0.000131	5	7.48e-05	5	8.26e-05	5			1	2	0.00812	4	0.0022	4	97
54	BP	GO:0070727	cellular macromolecule localization	4	1	6	1	3	1	6	0.00856	10	1	4	0.00856	10	1	3	4.12e-07	14	9.59e-06	12	9.32e-07	13	0.523	8	1	6	1549
55	BP	GO:0008298	intracellular mRNA localization	5			1	1																					11
56	BP	GO:0034613	cellular protein localization	5	1	6	1	2	1	6	0.00804	10	1	4	0.00804	10	1	3	3.76e-07	14	8.86e-06	12	8.55e-07	13	0.498	8	1	6	1538
57	BP	GO:1990778	protein localization to cell periphery	6							1	1			1	1	1	1	0.0041	5	1	1	1	3	0.178	4	1	2	213
58	BP	GO:1902463	protein localization to cell leading edge	6															1	1									2
59	BP	GO:0033365	protein localization to organelle	6	0.559	6	1	1	0.157	6	0.00771	8	1	4	0.0772	7	1	2	0.000353	9	1.66e-08	12	4.1e-07	11	1	5	1	5	884
60	BP	GO:0072665	protein localization to vacuole	7					1	1			1	1															33
61	BP	GO:0061462	protein localization to lysosome	8					1	1			1	1															20
62	BP	GO:0070585	protein localization to mitochondrion	7							1	2	1	2	0.115	4			0.0768	4	1	1	0.0483	4	1	1	1	2	195
63	BP	GO:0034067	protein localization to Golgi apparatus	7															1	1					1	1			32
64	BP	GO:0034502	protein localization to chromosome	7	1	1					0.069	3	1	1															58
65	BP	GO:0070198	protein localization to chromosome, telomeric region	8	1	1					1	1																	25
66	BP	GO:0071168	protein localization to chromatin	8							0.244	2	1	1															15
67	BP	GO:0044380	protein localization to cytoskeleton	7							1	1																	35
68	BP	GO:0072698	protein localization to microtubule cytoskeleton	8							1	1																	31
69	BP	GO:1902480	protein localization to mitotic spindle	9							1	1																	1
70	BP	GO:0034504	protein localization to nucleus	7	0.963	4	1	1	1	2	1	2	1	1	1	2	1	1	1	1	1	3	1	2	1	2	1	2	354
71	BP	GO:0036010	protein localization to endosome	7																			0.108	2			1	1	13
72	BP	GO:1902946	protein localization to early endosome	8																			0.0209	2					6
73	BP	GO:0070972	protein localization to endoplasmic reticulum	7					0.00985	4					1	1	1	1	0.0192	4	6.59e-10	8	0.445	3	1	2			137
74	BP	GO:0072594	establishment of protein localization to organelle	7	1	5			0.41	5	1	4	1	3	0.145	6	1	2	0.000524	8	6.27e-10	12	1.06e-05	9	1	4	1	3	667
75	BP	GO:0070199	establishment of protein localization to chromosome	8	1	1					0.586	2																	23
76	BP	GO:0070200	establishment of protein localization to telomere	9	1	1					1	1																	15
77	BP	GO:0071169	establishment of protein localization to chromatin	9							1	1																	7
78	BP	GO:0072600	establishment of protein localization to Golgi	8																					1	1			21
79	BP	GO:0072599	establishment of protein localization to endoplasmic reticulum	8					0.00544	4					1	1	1	1	0.0107	4	1.95e-10	8	0.287	3	1	2			118
80	BP	GO:0072666	establishment of protein localization to vacuole	8					1	1			1	1															27
81	BP	GO:0072655	establishment of protein localization to mitochondrion	8							1	2	1	2	0.104	4			0.0694	4	1	1	0.0436	4	1	1	1	2	190
82	BP	GO:0051640	organelle localization	4	1	2			1	1	1	2	1	1					1	2					1	1			466
83	BP	GO:0033750	ribosome localization	5	1	1																							8
84	BP	GO:0050000	chromosome localization	5	1	1					1	2																	61
85	BP	GO:0032418	lysosome localization	5																					1	1			49
86	BP	GO:0051648	vesicle localization	5					1	1			1	1					1	2									240
87	BP	GO:0097479	synaptic vesicle localization	6					1	1																			114
88	BP	GO:0051656	establishment of organelle localization	5	1	2			1	1	1	2	1	1					1	2									355
89	BP	GO:0051668	localization within membrane	4									1	1					0.199	3									93
90	BP	GO:0051649	establishment of localization in cell	4	0.603	10	1	6	0.0134	11	0.0299	12	0.0676	10	0.00513	13	0.325	10	3.81e-12	22	4.93e-05	14	6.23e-05	14	0.00823	13	0.0676	10	2640
91	BP	GO:0099504	synaptic vesicle cycle	5					1	1																			89
92	BP	GO:0033753	establishment of ribosome localization	5	1	1																							8
93	BP	GO:0046907	intracellular transport	5	1	8	1	6	0.000567	11	0.0514	10	1	7	0.000129	13	1	7	7.92e-14	21	7.78e-07	14	9.94e-07	14	0.00164	12	0.0317	9	1905
94	BP	GO:0016482	cytoplasmic transport	6	0.562	7	1	5	8.43e-06	11	0.012	9	1	4	0.000131	11	0.351	7	2.48e-13	18	5.79e-08	13	1.59e-05	11	0.00191	10	0.00109	9	1257
95	BP	GO:0051169	nuclear transport	6	0.000696	7	0.0454	5	0.926	4	4.22e-05	8	1	2	0.00085	7	0.126	5	0.138	5	1	4	1	4	0.0178	6	0.00271	6	443
96	BP	GO:0006913	nucleocytoplasmic transport	7	0.000645	7	0.043	5	0.887	4	3.86e-05	8	1	2	0.000788	7	0.119	5	0.131	5	1	4	1	4	0.234	5	0.00254	6	438
97	BP	GO:0051168	nuclear export	8	0.00122	5	0.000287	5	0.0169	4	1.17e-08	8	1	2	6.86e-07	7	0.000829	5	0.000914	5	1	1	1	2	0.0544	4	0.000332	5	157
98	BP	GO:0006405	RNA export from nucleus	9	0.000105	5	2.44e-05	5	0.00239	4	2.13e-10	8			0.000124	5	7.1e-05	5	7.84e-05	5			1	2	0.00779	4	2.82e-05	5	96
99	BP	GO:0051170	nuclear import	8	0.402	4	1	1	1	1					1	1	1	1			1	3	1	2			1	2	281
100	BP	GO:0006886	intracellular protein transport	6	1	4	1	1	1	5	1	2	1	3	0.0221	8	1	3	7.49e-06	11	8.78e-08	12	1.87e-06	11	1	5	1	3	1022
101	BP	GO:0051303	establishment of chromosome localization	5	1	1					1	2																	61
102	BP	GO:0051650	establishment of vesicle localization	5					1	1			1	1					1	2									228
103	BP	GO:0097480	establishment of synaptic vesicle localization	6					1	1																			108
104	BP	GO:0002376	immune system process	2	1	6	1	3	1	4	1	6	0.00164	12	1	6	0.069	11	0.00264	13	1	5	1	7	1	6	1	8	2673
105	BP	GO:0002440	production of molecular mediator of immune response	3	1	1					1	1			1	1	1	1	1	1	1	1					1	2	159
106	BP	GO:0002377	immunoglobulin production	4	1	1					1	1			1	1	1	1	1	1							1	1	92
107	BP	GO:0002252	immune effector process	3	1	2					1	2	1	1	1	3	0.209	6	1	4	1	1	1	1	1	2	1	2	796
108	BP	GO:0002443	leukocyte mediated immunity	4							1	1	1	1	1	1	1	2	1	1	1	1			1	1	1	2	311
109	BP	GO:0002444	myeloid leukocyte mediated immunity	5																					1	1			76
110	BP	GO:0002448	mast cell mediated immunity	6																					1	1			44
111	BP	GO:0002449	lymphocyte mediated immunity	5							1	1	1	1	1	1	1	2	1	1	1	1					1	2	240
112	BP	GO:0019882	antigen processing and presentation	3			1	1	1	1			1	1			1	1	1	2			1	1	1	1	1	2	241
113	BP	GO:0002468	dendritic cell antigen processing and presentation	4													1	1	1	1							1	1	8
114	BP	GO:0048002	antigen processing and presentation of peptide antigen	4			1	1	1	1			1	1									1	1	1	1			194
115	BP	GO:0002474	antigen processing and presentation of peptide antigen via MHC class I	5																			1	1					107
116	BP	GO:0019884	antigen processing and presentation of exogenous antigen	4			1	1	1	1			1	1											1	1			181
117	BP	GO:0002478	antigen processing and presentation of exogenous peptide antigen	5			1	1	1	1			1	1											1	1			174
118	BP	GO:0002504	antigen processing and presentation of peptide or polysaccharide antigen via MHC class II	4			1	1	1	1			1	1			1	1	1	1					1	1	1	1	99
119	BP	GO:0002495	antigen processing and presentation of peptide antigen via MHC class II	5			1	1	1	1			1	1											1	1			96
120	BP	GO:0019886	antigen processing and presentation of exogenous peptide antigen via MHC class II	6			1	1	1	1			1	1											1	1			92
121	BP	GO:0009987	cellular process	2	3.61e-23	55	8e-20	44	2.15e-19	45	1.1e-23	56	4.17e-16	42	4.39e-30	60	3.76e-29	56	2.31e-30	58	8.41e-28	51	1.22e-19	47	2.21e-25	59	4.97e-26	48	15371
122	BP	GO:0006914	autophagy	3	1	1	1	2	1	1	1	1	1	4	1	3	0.271	5	0.0227	6			1	2	1	1	1	2	522
123	BP	GO:0016236	macroautophagy	4	1	1	1	2	1	1	1	1	1	2	1	3	1	3	0.0503	5			1	2	1	1	1	2	358
124	BP	GO:0006457	protein folding	3			1	1			0.0115	5	1	3	1	1	0.162	4	1	2	1	2	1	2	1	2	1	1	240
125	BP	GO:0061077	chaperone-mediated protein folding	4							1	2	1	1			0.032	3	1	2	1	1					1	1	51
126	BP	GO:0042026	protein refolding	4							1	1					1	1	1	1							1	1	22
127	BP	GO:0070389	chaperone cofactor-dependent protein refolding	5							1	1																	5
128	BP	GO:0006458	'de novo' protein folding	4							1	1					1	1	1	1			1	1	1	1	1	1	57
129	BP	GO:0051084	'de novo' posttranslational protein folding	5							1	1					1	1	1	1			1	1	1	1	1	1	53
130	BP	GO:0051085	chaperone mediated protein folding requiring cofactor	6							1	1					1	1	1	1							1	1	10
131	BP	GO:0000003	reproduction	2	1	5	1	4	1	2	1	3	1	2	1	4	1	2	1	2	1	4	1	1	1	3	1	3	1403
132	BP	GO:0022610	biological adhesion	2	1	2	1	2	1	5	1	1	1	2	1	2	1	3	1	6	1	4	0.0658	8	1	2	1	4	1467
133	BP	GO:0007155	cell adhesion	3	1	2	1	2	1	5	1	1	1	2	1	2	1	3	1	6	1	4	0.0639	8	1	2	1	4	1461
134	BP	GO:0098609	cell-cell adhesion	4	1	1			1	2	1	1	1	2	1	2	1	2	1	4	1	4	0.241	6			1	3	906
135	BP	GO:0031589	cell-substrate adhesion	4	1	1			1	1			1	1	1	1	1	1	1	3	1	1	1	1	1	1	1	1	311
136	BP	GO:0007160	cell-matrix adhesion	5					1	1			1	1	1	1	1	1	1	1					1	1	1	1	201
137	BP	GO:0040011	locomotion	2	1	3	1	1			1	3	1	3	1	2	1	3	0.781	8	1	4	1	7	1	3	1	4	1853
138	BP	GO:0008152	metabolic process	2	3.67e-23	51	9.8e-23	43	1.81e-22	44	1.81e-26	54	4.67e-14	37	6.49e-28	55	4.08e-31	54	2.85e-23	50	2.31e-25	47	2.69e-15	40	1.44e-19	50	7.88e-22	43	12055
139	BP	GO:0044238	primary metabolic process	3	1.77e-23	49	1.11e-23	42	1.18e-20	41	8.86e-27	52	7.32e-09	30	8.86e-27	52	3.2e-29	51	9.4e-20	45	3.61e-28	47	3.91e-13	36	4.37e-20	48	7.69e-23	42	10482
140	BP	GO:0009058	biosynthetic process	3	6.39e-18	37	9.24e-09	24	3.97e-10	26	2.31e-14	34	7.58e-06	21	6.31e-08	27	7.65e-13	31	2.37e-11	30	4.53e-17	33	4.28e-05	21	1.54e-14	35	1.93e-09	25	6390
141	BP	GO:0071704	organic substance metabolic process	3	7.39e-23	49	3.91e-23	42	3.94e-20	41	4.1e-26	52	2.04e-09	31	1.67e-27	53	7.46e-32	53	7.19e-23	48	1.49e-27	47	9.92e-14	37	1.71e-19	48	8.07e-24	43	10808
142	BP	GO:1901615	organic hydroxy compound metabolic process	4			1	1									1	2			1	1	1	2	1	4	1	1	559
143	BP	GO:0043170	macromolecule metabolic process	4	4.26e-22	46	2.7e-21	39	1.92e-17	37	5.31e-28	51	2.07e-08	28	9.36e-23	47	3.21e-27	48	9.18e-21	44	2e-21	41	4.12e-08	29	6.65e-17	43	5.13e-22	40	9286
144	BP	GO:0010467	gene expression	5	8.11e-23	39	4.59e-21	33	2.95e-24	36	6.39e-25	41	3.86e-07	21	1.22e-23	40	1.04e-28	42	3.68e-21	37	6.9e-22	35	4.05e-08	23	9.82e-16	34	7.38e-28	38	5430
145	BP	GO:0043412	macromolecule modification	5	0.0236	15	1	7	1	5	0.000235	18	0.617	11	1	10	0.807	12	1	7	1	6	1	9	0.832	13	0.617	11	4139
146	BP	GO:0098732	macromolecule deacylation	6									1	1	1	1							1	2	1	1	1	1	87
147	BP	GO:0019538	protein metabolic process	5	1	15	0.0345	15	1	13	0.000308	21	0.00196	17	1	14	0.0014	19	0.0106	18	0.00536	17	0.000259	19	0.000145	22	0.204	14	5770
148	BP	GO:0042107	cytokine metabolic process	6													1	1	1	1			1	1			1	1	115
149	BP	GO:0050755	chemokine metabolic process	7																			1	1					15
150	BP	GO:0006508	proteolysis	6	1	3	1	4	1	1	0.581	8	0.552	7	1	3	1	7	1	5	1	4	1	6	1	5	1	5	1632
151	BP	GO:0033619	membrane protein proteolysis	7									1	1							1	1					1	1	55
152	BP	GO:0006509	membrane protein ectodomain proteolysis	8									1	1							1	1					1	1	39
153	BP	GO:0042982	amyloid precursor protein metabolic process	6									1	1															31
154	BP	GO:0042987	amyloid precursor protein catabolic process	7									1	1															21
155	BP	GO:0051604	protein maturation	6							1	1	1	1	1	1	1	3	1	2	1	1	1	1			1	3	354
156	BP	GO:0016485	protein processing	7									1	1	1	1	1	3	1	2	1	1	1	1			1	3	328
157	BP	GO:0031638	zymogen activation	8									1	1			0.453	3	1	2							1	2	124
158	BP	GO:0031639	plasminogen activation	9													1	1	1	1							1	1	20
159	BP	GO:0022417	protein maturation by protein folding	7							1	1																	9
160	BP	GO:0036211	protein modification process	6	1	11	1	6	1	4	0.00377	16	0.42	11	1	9	0.538	12	1	6	1	6	1	9	0.542	13	1	9	3959
161	BP	GO:1902224	ketone body metabolic process	4													1	1			1	1							11
162	BP	GO:1901135	carbohydrate derivative metabolic process	4	1	2	1	2	1	1	1	1	1	3	1	2	1	3	1	5	1	1	1	5	1	5	1	3	1381
163	BP	GO:0006040	amino sugar metabolic process	5									1	1											1	1			41
164	BP	GO:1901071	glucosamine-containing compound metabolic process	6																					1	1			27
165	BP	GO:0006041	glucosamine metabolic process	7																					1	1			5
166	BP	GO:0006044	N-acetylglucosamine metabolic process	7																					1	1			18
167	BP	GO:1901576	organic substance biosynthetic process	4	4.04e-18	37	6.04e-08	23	2.9e-10	26	1.53e-14	34	5.95e-06	21	4.63e-08	27	5.25e-13	31	1.66e-11	30	2.99e-17	33	0.00103	19	9.91e-14	34	1.43e-09	25	6305
168	BP	GO:1901617	organic hydroxy compound biosynthetic process	5													1	1			1	1			1	1			231
169	BP	GO:1901137	carbohydrate derivative biosynthetic process	5	1	1			1	1			1	2			1	2	1	4	1	1	1	2	1	3	1	2	894
170	BP	GO:0009059	macromolecule biosynthetic process	5	2.76e-17	34	1.57e-09	23	5.28e-10	24	7.55e-16	33	1.35e-05	19	4.27e-08	25	4.93e-11	27	1.32e-10	27	1.1e-13	28	0.0105	16	4.93e-13	31	2.83e-10	24	5283
171	BP	GO:1901360	organic cyclic compound metabolic process	4	1.91e-31	47	5.42e-25	37	2.16e-22	36	1.31e-21	40	5.07e-07	22	1.31e-21	40	1.55e-26	42	3.9e-18	36	1.5e-28	41	9.45e-10	26	3.6e-17	37	6.1e-23	36	6143
172	BP	GO:1901362	organic cyclic compound biosynthetic process	5	1.07e-20	35	6.66e-08	20	1.86e-10	23	1.44e-13	29	0.00232	15	4.09e-06	21	9.42e-09	23	0.000295	18	2.53e-14	27	3.34e-05	18	4.22e-09	25	1.1e-07	20	4506
173	BP	GO:0005975	carbohydrate metabolic process	4	1	3	1	1			1	1	1	4	1	3	1	4	0.882	6	1	5	1	1	1	5	1	4	1020
174	BP	GO:0005976	polysaccharide metabolic process	5							1	1			1	1									1	1			117
175	BP	GO:0044042	glucan metabolic process	6							1	1			1	1													87
176	BP	GO:0009056	catabolic process	3	1	6	0.0138	10	0.851	8	0.00089	13	0.119	9	1	9	0.0143	11	0.0188	11	0.000576	12	8.65e-06	14	0.00939	12	1	6	2256
177	BP	GO:1901575	organic substance catabolic process	4	1	6	0.00255	10	0.234	8	0.000832	12	0.194	8	1	7	0.69	8	1	6	7.36e-05	12	8.94e-05	12	0.00131	12	1	4	1864
178	BP	GO:1901361	organic cyclic compound catabolic process	5	1	3	0.00392	6	0.0934	5	1	3	1	4	1	2	1	3	0.212	5	1.94e-08	10	0.12	5	0.03	6	1	2	486
179	BP	GO:0009057	macromolecule catabolic process	5	1	4	0.594	6	0.808	6	8.11e-05	11	0.694	6	1	6	1	4	1	4	0.00132	9	0.00151	9	0.0899	8	1	3	1199
180	BP	GO:0030163	protein catabolic process	6	1	1	1	3	1	1	0.00472	8	1	4	1	2	1	2					1	5	1	3	1	1	827
181	BP	GO:1901616	organic hydroxy compound catabolic process	5																					1	1	1	1	72
182	BP	GO:1901136	carbohydrate derivative catabolic process	5							1	1			1	1									1	1			182
183	BP	GO:0046348	amino sugar catabolic process	6																					1	1			13
184	BP	GO:1901072	glucosamine-containing compound catabolic process	7																					1	1			9
185	BP	GO:0006043	glucosamine catabolic process	8																					1	1			1
186	BP	GO:0016052	carbohydrate catabolic process	5	1	1	1	1			1	1	1	1	1	1			1	1			1	1	1	1			146
187	BP	GO:0000272	polysaccharide catabolic process	6							1	1																	32
188	BP	GO:0009251	glucan catabolic process	7							1	1																	30
189	BP	GO:0032259	methylation	3	1	4	1	1	1	1	1	2	1	1	1	1	1	3	1	1	1	2	1	2	1	1	1	2	367
190	BP	GO:0006807	nitrogen compound metabolic process	3	4.37e-29	47	1.01e-27	40	6.02e-22	37	3.01e-23	43	9.42e-08	24	1.66e-24	44	3.49e-27	44	8.53e-20	39	5.38e-28	42	1.82e-09	27	3.52e-23	44	1.59e-22	37	6922
191	BP	GO:0097164	ammonium ion metabolic process	4																			1	1	1	2			182
192	BP	GO:1901564	organonitrogen compound metabolic process	4	1	8	0.00204	11	0.164	9	1	6	1	6	1	9	1	8	5.91e-05	14	7.88e-07	15	0.00618	11	3.92e-06	16	1	4	2290
193	BP	GO:1901565	organonitrogen compound catabolic process	5	1	2	0.34	4			1	1	1	1	1	1	1	1	1	1	1	3	1	2	1	3			362
194	BP	GO:1901566	organonitrogen compound biosynthetic process	5	1	7	1	5	0.00415	9	1	5	1	4	1	6	0.795	7	2.31e-05	12	4.22e-06	12	0.429	7	8.21e-05	12	1	4	1439
195	BP	GO:0006022	aminoglycan metabolic process	5											1	1									1	1			180
196	BP	GO:0006026	aminoglycan catabolic process	6											1	1													69
197	BP	GO:0030203	glycosaminoglycan metabolic process	6											1	1									1	1			172
198	BP	GO:1903510	mucopolysaccharide metabolic process	7											1	1									1	1			130
199	BP	GO:0030212	hyaluronan metabolic process	8											1	1									1	1			38
200	BP	GO:0006027	glycosaminoglycan catabolic process	7											1	1													63
201	BP	GO:0009308	amine metabolic process	5											1	1							1	1	1	3			239
202	BP	GO:0009310	amine catabolic process	6																			1	1					17
203	BP	GO:0009820	alkaloid metabolic process	5																					1	1			11
204	BP	GO:0044237	cellular metabolic process	3	1.17e-23	49	7.75e-24	42	8.32e-21	41	5.7e-27	52	6.89e-10	31	7.56e-30	54	9.48e-33	53	4.05e-21	46	2.4e-28	47	2.1e-15	38	2.95e-20	48	5.36e-23	42	10390
205	BP	GO:0006793	phosphorus metabolic process	4	1	5	1	4	1	4	0.167	12	1	6	1	9	1	4	1	5	1	2	1	8	1	8	1	3	3149
206	BP	GO:0006796	phosphate-containing compound metabolic process	5	1	5	1	4	1	3	0.623	11	1	6	1	9	1	4	1	3	1	2	1	8	1	8	1	3	3088
207	BP	GO:0016310	phosphorylation	6	1	4	1	3	1	2	0.924	9	1	5	1	6	1	3	1	2	1	1	1	4	1	3	1	1	2213
208	BP	GO:0016311	dephosphorylation	6			1	2			1	2	1	1	1	3							1	1	1	3	1	1	434
209	BP	GO:0019637	organophosphate metabolic process	5	1	2	1	1	1	1	1	1	1	1	1	3	1	2	1	3	1	1	1	3	1	4	1	2	1081
210	BP	GO:0090407	organophosphate biosynthetic process	6	1	1			1	1					1	1							1	2	1	2	1	1	595
211	BP	GO:0019692	deoxyribose phosphate metabolic process	6							1	1											1	1					32
212	BP	GO:0046385	deoxyribose phosphate biosynthetic process	7																			1	1					9
213	BP	GO:0030388	fructose 1,6-bisphosphate metabolic process	6			1	1					1	1											1	1			6
214	BP	GO:0006002	fructose 6-phosphate metabolic process	6									1	1															8
215	BP	GO:0006003	fructose 2,6-bisphosphate metabolic process	6			1	1																	1	1			6
216	BP	GO:0046434	organophosphate catabolic process	6			1	1			1	1													1	1			156
217	BP	GO:0046386	deoxyribose phosphate catabolic process	7							1	1																	21
218	BP	GO:0019693	ribose phosphate metabolic process	6	1	2	1	1	1	1			1	1	1	1	1	1	1	2			1	2	1	2	1	1	534
219	BP	GO:0046390	ribose phosphate biosynthetic process	7	1	1			1	1													1	1	1	1			267
220	BP	GO:0051156	glucose 6-phosphate metabolic process	6			1	1							1	1			1	1					0.817	2			27
221	BP	GO:0044248	cellular catabolic process	4	1	6	0.00134	10	0.143	8	0.00039	12	0.118	8	1	6	0.0672	9	0.506	8	3.38e-05	12	3.68e-06	13	0.00473	11	1	4	1736
222	BP	GO:0044260	cellular macromolecule metabolic process	4	1.47e-23	46	3.87e-21	38	1.28e-18	37	1.18e-29	51	2.5e-08	27	2.99e-24	47	2.57e-27	47	1.36e-18	41	9.54e-23	41	5.87e-09	29	3.17e-18	43	6.99e-22	39	8596
223	BP	GO:0043414	macromolecule methylation	5	1	3	1	1	1	1	1	2	1	1	1	1	1	3	1	1	1	1	1	2			1	2	280
224	BP	GO:0043112	receptor metabolic process	5									1	1	1	2	1	1	1	1					1	2			151
225	BP	GO:0032801	receptor catabolic process	6											1	1									1	1			24
226	BP	GO:0044267	cellular protein metabolic process	5	0.298	15	0.0442	14	0.345	13	0.000244	20	0.00232	16	1	14	0.00131	18	0.0101	17	0.00599	16	4.3e-05	19	0.000105	21	0.264	13	5157
227	BP	GO:0006464	cellular protein modification process	6	1	11	1	6	1	4	0.00377	16	0.42	11	1	9	0.538	12	1	6	1	6	1	9	0.542	13	1	9	3959
228	BP	GO:0070647	protein modification by small protein conjugation or removal	7	1	4	1	1	1	2	0.193	7	1	4	1	1	1	4	1	1	1	2	1	2	1	3	1	2	1023
229	BP	GO:0032446	protein modification by small protein conjugation	8	1	3	1	1	1	1	0.084	7	1	3	1	1	1	3			1	1	1	2	1	3	1	2	896
230	BP	GO:0016567	protein ubiquitination	9	1	1			1	1	0.036	7	1	3	1	1	1	2					1	1	1	1	1	1	784
231	BP	GO:0000209	protein polyubiquitination	10									1	1									1	1					224
232	BP	GO:0070534	protein K63-linked ubiquitination	11									1	1															45
233	BP	GO:0051865	protein autoubiquitination	10	1	1																							51
234	BP	GO:0006513	protein monoubiquitination	10					1	1	1	1															1	1	53
235	BP	GO:0045116	protein neddylation	9																			1	1					13
236	BP	GO:0070646	protein modification by small protein removal	8	1	1			1	1			1	1			1	1	1	1	1	1							145
237	BP	GO:0016579	protein deubiquitination	9	1	1			1	1			1	1			1	1	1	1	1	1							128
238	BP	GO:0070536	protein K63-linked deubiquitination	10	1	1							1	1			1	1	1	1	1	1							25
239	BP	GO:0043543	protein acylation	7	1	3					1	1									1	1			1	2			217
240	BP	GO:0006473	protein acetylation	8	1	3					1	1									1	1			1	2			187
241	BP	GO:0006475	internal protein amino acid acetylation	9	1	3					1	1									1	1			1	2			162
242	BP	GO:0010731	protein glutathionylation	7																					1	1			1
243	BP	GO:0008214	protein dealkylation	7			1	1									1	1	1	1			1	1			1	1	42
244	BP	GO:0008213	protein alkylation	7	1	1			1	1	1	2	1	1	1	1	1	2			1	1	1	1			1	1	160
245	BP	GO:0006479	protein methylation	8	1	1			1	1	1	2	1	1	1	1	1	2			1	1	1	1			1	1	160
246	BP	GO:0018364	peptidyl-glutamine methylation	9											1	1											1	1	3
247	BP	GO:0035601	protein deacylation	7									1	1	1	1							1	2	1	1	1	1	85
248	BP	GO:0006476	protein deacetylation	8									1	1	1	1							1	2	1	1	1	1	80
249	BP	GO:0018193	peptidyl-amino acid modification	7	1	6	1	1	1	1	1	7	0.187	7	1	2	1	3	1	3	1	4	1	2	0.224	8	1	2	1367
250	BP	GO:0018196	peptidyl-asparagine modification	8									1	2			1	1	1	2	1	1			1	1	1	1	249
251	BP	GO:0018202	peptidyl-histidine modification	8																					1	1			11
252	BP	GO:0017182	peptidyl-diphthamide metabolic process	9																					1	1			8
253	BP	GO:0018209	peptidyl-serine modification	8							1	3	1	1	1	1													264
254	BP	GO:0018210	peptidyl-threonine modification	8							1	1	1	1															83
255	BP	GO:0018212	peptidyl-tyrosine modification	8							1	1			1	2							1	1					338
256	BP	GO:0018208	peptidyl-proline modification	8							1	1	1	2			1	1	1	1	1	1			1	1			61
257	BP	GO:0000413	protein peptidyl-prolyl isomerization	9							1	1	1	2			1	1	1	1	1	1			1	1			47
258	BP	GO:0018205	peptidyl-lysine modification	8	0.00665	6	1	1	1	1	1	2	1	2			1	1			1	2	1	1	0.149	5	1	1	398
259	BP	GO:0016925	protein sumoylation	9	0.62	3	1	1					1	1			1	1			1	1			0.747	3	1	1	127
260	BP	GO:0018394	peptidyl-lysine acetylation	9	1	3					1	1									1	1			1	2			161
261	BP	GO:0018393	internal peptidyl-lysine acetylation	10	1	3					1	1									1	1			1	2			156
262	BP	GO:0018022	peptidyl-lysine methylation	9					1	1	1	1	1	1							1	1	1	1					109
263	BP	GO:0018027	peptidyl-lysine dimethylation	10																	1	1							16
264	BP	GO:0018023	peptidyl-lysine trimethylation	10					1	1											1	1	1	1					31
265	BP	GO:0018026	peptidyl-lysine monomethylation	10																	1	1							8
266	BP	GO:0018149	peptide cross-linking	7													1	1	1	1							1	1	56
267	BP	GO:0043687	post-translational protein modification	7	1	4	1	1					1	3			1	3	1	3	1	2			0.351	5	1	4	478
268	BP	GO:0051725	protein de-ADP-ribosylation	7			1	1															1	1					4
269	BP	GO:0006470	protein dephosphorylation	7			1	1			1	2			1	2							1	1	1	1	1	1	335
270	BP	GO:0035335	peptidyl-tyrosine dephosphorylation	8											1	1							1	1					101
271	BP	GO:0006468	protein phosphorylation	7	1	3	1	2	1	2	1	8	1	4	1	4	1	3	1	1	1	1	1	1	1	2	1	1	1849
272	BP	GO:0100002	negative regulation of protein kinase activity by protein phosphorylation	8											1	1													8
273	BP	GO:0046777	protein autophosphorylation	8													1	1											230
274	BP	GO:0018108	peptidyl-tyrosine phosphorylation	8							1	1			1	2							1	1					336
275	BP	GO:0018107	peptidyl-threonine phosphorylation	8							1	1	1	1															79
276	BP	GO:0018105	peptidyl-serine phosphorylation	8							1	3	1	1	1	1													250
277	BP	GO:0034982	mitochondrial protein processing	6																			1	1					9
278	BP	GO:0020027	hemoglobin metabolic process	5	1	1																							17
279	BP	GO:0009100	glycoprotein metabolic process	5									1	2			1	3	1	4	1	1			1	1	1	2	552
280	BP	GO:0044265	cellular macromolecule catabolic process	5	1	4	0.175	6	0.24	6	0.00129	9	0.205	6	1	3	1	4	1	4	0.000199	9	0.000228	9	0.157	7	1	3	956
281	BP	GO:0043632	modification-dependent macromolecule catabolic process	6	1	1	1	4			0.00621	7	1	3	1	1	1	2					1	3	1	3	1	1	598
282	BP	GO:0044257	cellular protein catabolic process	6	1	1	1	3	1	1	0.0145	7	1	4	1	1	1	2					0.575	5	1	3	1	1	681
283	BP	GO:0051603	proteolysis involved in cellular protein catabolic process	7	1	1	1	3			0.0107	7	1	3	1	1	1	2					1	3	1	3	1	1	650
284	BP	GO:0010498	proteasomal protein catabolic process	8	1	1	1	2			0.00934	6	1	2	1	1	1	2					1	2	1	1	1	1	409
285	BP	GO:0006515	misfolded or incompletely synthesized protein catabolic process	8			1	1																					17
286	BP	GO:0019941	modification-dependent protein catabolic process	8	1	1	1	3			0.00569	7	1	3	1	1	1	2					1	3	1	3	1	1	590
287	BP	GO:0006511	ubiquitin-dependent protein catabolic process	9	1	1	1	2			0.0052	7	1	3	1	1	1	2					1	3	1	3	1	1	582
288	BP	GO:0043161	proteasome-mediated ubiquitin-dependent protein catabolic process	10	1	1	1	2			0.00641	6	1	2	1	1	1	2					1	2	1	1	1	1	383
289	BP	GO:0031145	anaphase-promoting complex-dependent proteasomal ubiquitin-dependent protein catabolic process	11							0.000379	5	1	2			1	2											120
290	BP	GO:0042787	protein ubiquitination involved in ubiquitin-dependent protein catabolic process	10							1	3	1	2	1	1									1	1			200
291	BP	GO:0070407	oxidation-dependent protein catabolic process	9			1	1																					1
292	BP	GO:0046483	heterocycle metabolic process	4	3.14e-32	47	1.15e-22	35	5.47e-23	36	2.94e-22	40	2.36e-07	22	2.94e-22	40	1.73e-24	40	1.03e-18	36	1.07e-27	40	3.39e-09	25	1.12e-16	36	1.54e-23	36	5905
293	BP	GO:0046700	heterocycle catabolic process	5	1	3	0.736	4	0.0608	5	1	3	0.829	4	1	2	1	3	0.139	5	8e-09	10	0.0783	5	0.249	5	1	2	444
294	BP	GO:0006725	cellular aromatic compound metabolic process	4	1.04e-30	46	1.44e-25	37	6.01e-23	36	3.26e-22	40	2.49e-07	22	3.26e-22	40	1.92e-24	40	1.13e-18	36	1.19e-27	40	3e-08	24	1.03e-17	37	1.69e-23	36	5921
295	BP	GO:0042537	benzene-containing compound metabolic process	5									1	1			1	1	1	1	1	1	1	1					24
296	BP	GO:0019439	aromatic compound catabolic process	5	1	3	0.00268	6	0.0683	5	1	3	1	3	1	2	1	2	1	4	3.27e-07	9	0.0879	5	0.0207	6	1	2	455
297	BP	GO:0018958	phenol-containing compound metabolic process	5																					1	1			99
298	BP	GO:0019336	phenol-containing compound catabolic process	6																					1	1			8
299	BP	GO:0009712	catechol-containing compound metabolic process	6																					1	1			52
300	BP	GO:0019614	catechol-containing compound catabolic process	7																					1	1			6
301	BP	GO:0006584	catecholamine metabolic process	7																					1	1			52
302	BP	GO:0042417	dopamine metabolic process	8																					1	1			33
303	BP	GO:0042424	catecholamine catabolic process	8																					1	1			6
304	BP	GO:0042420	dopamine catabolic process	9																					1	1			5
305	BP	GO:0042558	pteridine-containing compound metabolic process	5	1	1							1	1			1	1	1	1	1	1							34
306	BP	GO:0072593	reactive oxygen species metabolic process	4	1	1	1	1			1	1			1	1	1	3	1	2	1	1			1	1	1	1	248
307	BP	GO:1903409	reactive oxygen species biosynthetic process	5							1	1					1	1											91
308	BP	GO:0006790	sulfur compound metabolic process	4	1	1	1	1	1	1	1	1			1	1			1	2	1	1	1	1	1	4			383
309	BP	GO:0044273	sulfur compound catabolic process	5																					1	1			46
310	BP	GO:0035383	thioester metabolic process	5	1	1			1	1	1	1							1	2	1	1							91
311	BP	GO:0070813	hydrogen sulfide metabolic process	5			1	1																	1	1			7
312	BP	GO:0000103	sulfate assimilation	5																			1	1					8
313	BP	GO:0006091	generation of precursor metabolites and energy	4	1	2	1	1	1	1	1	2	1	1	1	4	0.204	5	1	2	1	2	1	1	1	2	1	1	491
314	BP	GO:0001887	selenium compound metabolic process	4					0.00526	4					1	1			0.392	3	1.82e-10	8	0.00643	4	0.0171	4			117
315	BP	GO:0051186	cofactor metabolic process	4	1	2	1	1	1	1	1	1	1	2	1	3	1	2	0.0559	5	1	2	1	1	1	3			366
316	BP	GO:0006732	coenzyme metabolic process	5	1	2	1	1	1	1	1	1	1	2	1	3	1	2	0.0237	5	1	2			1	3			306
317	BP	GO:0006733	oxidoreduction coenzyme metabolic process	6	1	1	1	1					1	1	0.983	3	1	1	1	2	1	1			1	3			142
318	BP	GO:0006637	acyl-CoA metabolic process	6	1	1			1	1	1	1							1	2	1	1							91
319	BP	GO:0035337	fatty-acyl-CoA metabolic process	7					1	1	1	1							1	2									52
320	BP	GO:0035336	long-chain fatty-acyl-CoA metabolic process	8					1	1	1	1							1	2									46
321	BP	GO:0006104	succinyl-CoA metabolic process	7	1	1																							5
322	BP	GO:0006084	acetyl-CoA metabolic process	7																	1	1							32
323	BP	GO:0044249	cellular biosynthetic process	4	2.39e-18	37	5e-09	24	2.03e-10	26	9.55e-15	34	4.52e-06	21	3.26e-08	27	3.42e-13	31	1.1e-11	30	2.86e-16	32	0.000816	19	6.22e-14	34	1.02e-09	25	6210
324	BP	GO:0043094	cellular metabolic compound salvage	5					1	1					1	1							1	1	1	2			36
325	BP	GO:0019438	aromatic compound biosynthetic process	5	7.08e-20	34	4.01e-08	20	1.03e-10	23	6.82e-14	29	0.00162	15	2.47e-06	21	4.52e-08	22	0.000193	18	1.74e-13	26	0.000145	17	2.27e-09	25	6.65e-08	20	4381
326	BP	GO:0051188	cofactor biosynthetic process	5					1	1	1	1			1	1			1	2	1	1			1	1			162
327	BP	GO:0009108	coenzyme biosynthetic process	6					1	1	1	1			1	1			1	2	1	1			1	1			134
328	BP	GO:0044272	sulfur compound biosynthetic process	5			1	1	1	1	1	1			1	1			1	2	1	1			1	2			217
329	BP	GO:0035384	thioester biosynthetic process	6					1	1	1	1							1	2	1	1							62
330	BP	GO:0071616	acyl-CoA biosynthetic process	7					1	1	1	1							1	2	1	1							62
331	BP	GO:0046949	fatty-acyl-CoA biosynthetic process	8					1	1	1	1							1	2									44
332	BP	GO:0035338	long-chain fatty-acyl-CoA biosynthetic process	9					1	1	1	1							1	2									42
333	BP	GO:0006085	acetyl-CoA biosynthetic process	8																	1	1							18
334	BP	GO:0070814	hydrogen sulfide biosynthetic process	6			1	1																	1	1			5
335	BP	GO:0018130	heterocycle biosynthetic process	5	4.12e-21	35	3.96e-08	20	1.01e-10	23	6.69e-14	29	0.00161	15	2.44e-06	21	4.46e-08	22	0.000191	18	1.71e-13	26	2.14e-05	18	2.23e-09	25	6.57e-08	20	4378
336	BP	GO:0034645	cellular macromolecule biosynthetic process	5	1.72e-15	32	8.31e-09	22	2.73e-09	23	3.56e-15	32	8.15e-06	19	2.19e-08	25	2.22e-10	26	6.29e-11	27	4.96e-14	28	0.00703	16	2.02e-12	30	1.44e-10	24	5123
337	BP	GO:0042541	hemoglobin biosynthetic process	6	1	1																							11
338	BP	GO:0009101	glycoprotein biosynthetic process	6									1	2			1	2	1	4	1	1			1	1	1	2	498
339	BP	GO:0034641	cellular nitrogen compound metabolic process	4	5.6e-30	47	1.71e-28	40	1.2e-22	37	4.76e-24	43	3.62e-08	24	4.76e-24	43	5.1e-28	44	1.63e-20	39	8.42e-29	42	5.25e-09	26	8.84e-23	43	3.16e-23	37	6616
340	BP	GO:0044271	cellular nitrogen compound biosynthetic process	5	3.16e-18	34	3.8e-08	21	1.19e-10	24	1.18e-15	32	0.000211	17	7.23e-08	24	9.29e-12	27	1.67e-08	24	2.47e-13	27	0.000135	18	6.94e-12	29	6.96e-09	22	4934
341	BP	GO:0044106	cellular amine metabolic process	5											1	1							1	1	1	3			230
342	BP	GO:0006576	cellular biogenic amine metabolic process	6											1	1							1	1	1	2			197
343	BP	GO:0042402	cellular biogenic amine catabolic process	7																			1	1					16
344	BP	GO:0006595	polyamine metabolic process	7											1	1									1	1			85
345	BP	GO:0044270	cellular nitrogen compound catabolic process	5	1	3	0.0459	5	0.0608	5	1	3	1	3	1	2	1	2	1	4	2.64e-07	9	0.0783	5	0.249	5	1	2	444
346	BP	GO:0072524	pyridine-containing compound metabolic process	5	1	1	1	1					1	1	0.866	3	1	1	1	2	1	1			0.913	3			136
347	BP	GO:0072525	pyridine-containing compound biosynthetic process	6											1	1									1	1			23
348	BP	GO:0072527	pyrimidine-containing compound metabolic process	5																			1	1			1	1	79
349	BP	GO:0072528	pyrimidine-containing compound biosynthetic process	6																			1	1			1	1	43
350	BP	GO:0072521	purine-containing compound metabolic process	5	1	2	1	2	1	1	1	1	1	1	1	1	1	1	1	2			1	3	1	1	1	1	575
351	BP	GO:0072522	purine-containing compound biosynthetic process	6	1	1			1	1													1	1					271
352	BP	GO:0072523	purine-containing compound catabolic process	6			1	1			1	1													1	1			56
353	BP	GO:0042430	indole-containing compound metabolic process	5																			1	1					28
354	BP	GO:0006586	indolalkylamine metabolic process	6																			1	1					18
355	BP	GO:0042436	indole-containing compound catabolic process	6																			1	1					11
356	BP	GO:0046218	indolalkylamine catabolic process	7																			1	1					11
357	BP	GO:0043603	cellular amide metabolic process	5	1	5	0.0222	7	0.00276	8	1	5	1	4	1	4	0.726	6	6.24e-06	11	1.29e-06	11	1	5	2.05e-05	11	1	3	1004
358	BP	GO:0043604	amide biosynthetic process	6	1	4	0.653	5	0.000433	8	1	5	1	2	1	4	1	5	8.28e-06	10	2e-06	10	1	4	0.00421	8	1	3	784
359	BP	GO:0006518	peptide metabolic process	6	1	3	0.0833	6	0.000697	8	1	5	1	3	1	4	1	5	1.5e-05	10	6.31e-05	9	1	5	0.000581	9	1	3	835
360	BP	GO:0050435	beta-amyloid metabolic process	7									1	1											1	1			24
361	BP	GO:0034205	beta-amyloid formation	8									1	1															11
362	BP	GO:0043171	peptide catabolic process	7																			1	1					24
363	BP	GO:0043043	peptide biosynthetic process	7	1	3	0.404	5	0.000195	8	1	5	1	2	1	4	1	5	3.06e-06	10	1.5e-05	9	1	4	0.00193	8	1	3	706
364	BP	GO:0006412	translation	8	1	3	0.333	5	0.000142	8	1	5	1	2	1	4	0.895	5	2.05e-06	10	1.04e-05	9	1	4	0.00141	8	1	3	677
365	BP	GO:0002181	cytoplasmic translation	9					1	1					1	1			1	1	0.0118	3	1	1	1	1			41
366	BP	GO:0006414	translational elongation	9					0.0623	4					1	2	1	1	1	3	2.89e-08	8	0.0759	4	0.198	4			219
367	BP	GO:0006139	nucleobase-containing compound metabolic process	5	6.27e-30	45	3.95e-23	35	1.83e-23	36	8.92e-23	40	7.41e-06	20	8.92e-23	40	2.21e-22	38	7.03e-17	34	2.93e-25	38	1.17e-07	23	3.93e-17	36	5.14e-24	36	5722
368	BP	GO:0090304	nucleic acid metabolic process	6	3.95e-29	43	2.75e-23	34	1.1e-23	35	1.35e-24	40	8.2e-06	19	1.17e-19	36	1.61e-21	36	5.08e-15	31	1.49e-25	37	5.85e-06	20	1.61e-16	34	9e-23	34	5125
369	BP	GO:0090305	nucleic acid phosphodiester bond hydrolysis	7	0.0138	5	1	1			1	2	0.104	4	1	2	1	2	1	1	1	1					1	2	258
370	BP	GO:0006259	DNA metabolic process	7	7.77e-06	11	0.199	6	1	2	0.146	7	0.00186	8	1	4	0.632	6	1	2	0.34	6	1	2	0.000194	10	8.4e-06	10	978
371	BP	GO:0010216	maintenance of DNA methylation	8	0.0312	2																							6
372	BP	GO:0022616	DNA strand elongation	8	1	2							1	1															44
373	BP	GO:0006310	DNA recombination	8	0.503	4	1	1			1	2	0.00776	5	1	1	0.019	5	1	2	1	1	1	1	1	3	0.00776	5	298
374	BP	GO:0016444	somatic cell DNA recombination	9	1	1					1	1	1	2	1	1	0.038	3	1	1							1	1	54
375	BP	GO:0006312	mitotic recombination	9	1	2							1	1															41
376	BP	GO:0006266	DNA ligation	8									0.16	2			0.235	2											17
377	BP	GO:0006304	DNA modification	8	1	2	1	1			1	1					1	1	1	1	1	1	1	1			1	1	122
378	BP	GO:0006305	DNA alkylation	9	1	2	1	1									1	1	1	1	1	1	1	1			1	1	89
379	BP	GO:0035510	DNA dealkylation	9							1	1																	22
380	BP	GO:0044728	DNA methylation or demethylation	9	1	2	1	1									1	1	1	1	1	1	1	1			1	1	102
381	BP	GO:0006260	DNA replication	8	0.0507	5	1	3	1	2	0.94	4	1	1	1	2					1	3			1	2	1	2	338
382	BP	GO:0006261	DNA-dependent DNA replication	9	0.62	3	1	1			1	2	1	1	1	1													127
383	BP	GO:0045005	DNA-dependent DNA replication maintenance of fidelity	10							1	1			1	1													24
384	BP	GO:0006278	RNA-dependent DNA replication	9	1	2	1	1	1	1	1	2			1	1									1	1	1	2	57
385	BP	GO:0006271	DNA strand elongation involved in DNA replication	9	1	2							1	1															38
386	BP	GO:0006270	DNA replication initiation	8							1	1																	35
387	BP	GO:0016070	RNA metabolic process	7	1.77e-25	39	6.51e-22	32	2.94e-25	35	9.63e-24	38	1.08e-05	18	3.14e-21	36	8.26e-22	35	3.8e-14	29	9.72e-26	36	6.81e-06	19	1.12e-13	30	7.43e-23	33	4606
388	BP	GO:0016071	mRNA metabolic process	8	1.32e-10	13	2.39e-24	20	1.66e-35	26	9.25e-25	22	3.1e-06	9	4.87e-23	21	1.34e-27	23	2.98e-20	19	6.79e-20	18	2.91e-07	10	7.57e-09	12	7.15e-28	22	631
389	BP	GO:0008334	histone mRNA metabolic process	9	0.567	2	1	1									0.475	2											24
390	BP	GO:0043631	RNA polyadenylation	8					1	1	0.0191	3	1	1					1	1							0.00745	3	38
391	BP	GO:0010501	RNA secondary structure unwinding	8							0.032	3			0.032	3			0.0225	3	1	2	1	2	1	1	1	2	45
392	BP	GO:0034660	ncRNA metabolic process	8	2.9e-06	9	0.986	4	1	4	0.312	5	1	2	0.0232	6	1	3	1	3	0.107	5	1	2	0.358	5	1	4	480
393	BP	GO:0071043	CUT metabolic process	9			1	1																					4
394	BP	GO:0016073	snRNA metabolic process	9	1	1					1	1																	34
395	BP	GO:0016072	rRNA metabolic process	9	1	2	0.51	3	0.623	3	0.00163	5	1	1	0.0543	4			0.998	3	0.0219	4	1	2	0.06	4	0.0165	4	161
396	BP	GO:0010586	miRNA metabolic process	9	1	1																							16
397	BP	GO:0016074	snoRNA metabolic process	9	1	1					1	1			1	1											1	1	9
398	BP	GO:0033967	box C/D snoRNA metabolic process	10											1	1											1	1	2
399	BP	GO:0033979	box H/ACA snoRNA metabolic process	10	1	1					1	1																	1
400	BP	GO:0006399	tRNA metabolic process	9	1	2					1	1			1	1	1	1			1	1			1	1	1	1	203
401	BP	GO:0034587	piRNA metabolic process	9									1	1															28
402	BP	GO:0006396	RNA processing	8	2.75e-19	20	1.81e-27	23	1.33e-30	25	1.01e-30	27	1.58e-06	10	2.99e-27	25	1.07e-26	24	1.12e-19	20	1.05e-14	16	0.000949	8	1.98e-11	15	7.5e-33	26	821
403	BP	GO:0036260	RNA capping	9	1.55e-11	7							0.775	2															37
404	BP	GO:0009452	7-methylguanosine RNA capping	10	1.55e-11	7							0.775	2															37
405	BP	GO:0034470	ncRNA processing	9	0.0458	5	0.241	4	0.307	4	0.0541	5	1	1	0.0541	5	1	1	1	3	0.0182	5	1	2	0.954	4	0.272	4	331
406	BP	GO:0043144	snoRNA processing	10	1	1					1	1			1	1											1	1	8
407	BP	GO:0034963	box C/D snoRNA processing	11											1	1											1	1	2
408	BP	GO:0034964	box H/ACA snoRNA processing	11	1	1					1	1																	1
409	BP	GO:0008033	tRNA processing	10	1	2					1	1			1	1	1	1			1	1			1	1	1	1	148
410	BP	GO:0031123	RNA 3'-end processing	9	0.395	3	1	2	1	2	1.76e-20	13	1	1	3.83e-06	6	2e-06	6	2.3e-06	6			1	2	0.0129	4	6.75e-09	7	109
411	BP	GO:0043628	ncRNA 3'-end processing	10	1	1					1	1			1	1											1	1	21
412	BP	GO:0031126	snoRNA 3'-end processing	11	1	1					1	1			1	1											1	1	8
413	BP	GO:0000494	box C/D snoRNA 3'-end processing	12											1	1											1	1	2
414	BP	GO:0000495	box H/ACA snoRNA 3'-end processing	12	1	1					1	1																	1
415	BP	GO:0008380	RNA splicing	9	0.000261	7	1.28e-24	18	3.1e-28	20	3.82e-20	17	1.39e-06	8	3.82e-20	17	1.21e-32	23	4.58e-17	15	1.86e-09	10	7.76e-05	7	2.51e-08	10	2.01e-22	17	383
416	BP	GO:0000375	RNA splicing, via transesterification reactions	10	0.00105	6	9.72e-25	17	1.45e-28	19	1.26e-16	14	1.51e-07	8	7.87e-15	13	3.19e-31	21	6.52e-19	15	1.14e-10	10	0.000367	6	2.04e-06	8	1.88e-18	14	289
417	BP	GO:0000377	RNA splicing, via transesterification reactions with bulged adenosine as nucleophile	11	0.0224	5	7.63e-25	17	1.11e-28	19	1.04e-16	14	1.35e-07	8	6.56e-15	13	2.36e-31	21	5.28e-19	15	9.89e-11	10	0.000338	6	1.83e-06	8	1.54e-18	14	285
418	BP	GO:0006397	mRNA processing	9	7.18e-11	12	3.11e-25	19	8.91e-31	22	3.3e-24	20	1.73e-07	9	3.3e-24	20	6.48e-31	23	5.84e-16	15	9.96e-09	10	0.000246	7	1.32e-07	10	5.38e-29	21	454
419	BP	GO:0031124	mRNA 3'-end processing	10	1	2	1	2	1	2	8.97e-20	12	1	1	5.95e-05	5	3.8e-07	6	4.36e-07	6			1	2	0.00436	4	1.25e-07	6	83
420	BP	GO:0006378	mRNA polyadenylation	11					1	1	0.0176	3	1	1					1	1							0.00687	3	37
421	BP	GO:0006370	7-methylguanosine mRNA capping	10	6.46e-12	7							0.616	2															33
422	BP	GO:0000398	mRNA splicing, via spliceosome	10	0.0224	5	7.63e-25	17	1.11e-28	19	1.04e-16	14	1.35e-07	8	6.56e-15	13	2.36e-31	21	5.28e-19	15	9.89e-11	10	0.000338	6	1.83e-06	8	1.54e-18	14	285
423	BP	GO:0045292	mRNA cis splicing, via spliceosome	11	0.248	2					1	1					1	1			1	1					1	1	16
424	BP	GO:0000380	alternative mRNA splicing, via spliceosome	11			3.09e-07	5	7.52e-05	4	8.97e-09	6	0.953	2			1	2			1	1	1	1	0.000248	4	6.64e-05	4	41
425	BP	GO:0090501	RNA phosphodiester bond hydrolysis	8	1	2	1	1			1	1			1	2											1	2	113
426	BP	GO:0090503	RNA phosphodiester bond hydrolysis, exonucleolytic	9			1	1							1	1											1	1	30
427	BP	GO:0090502	RNA phosphodiester bond hydrolysis, endonucleolytic	9											1	1													62
428	BP	GO:0006379	mRNA cleavage	9	0.391	2					1	1															1	1	20
429	BP	GO:0098787	mRNA cleavage involved in mRNA processing	10	0.0746	2																							9
430	BP	GO:0098789	pre-mRNA cleavage required for polyadenylation	11	0.0312	2																							6
431	BP	GO:0009451	RNA modification	8	0.605	3	1	1	1	1	1	1			0.693	3			1	1							0.274	3	126
432	BP	GO:0016553	base conversion or substitution editing	9											1	1													9
433	BP	GO:0006382	adenosine to inosine editing	10											1	1													4
434	BP	GO:0001522	pseudouridine synthesis	9	1	1					1	1			1	1											1	1	17
435	BP	GO:0016556	mRNA modification	9	1	1					1	1			1	1													14
436	BP	GO:1990481	mRNA pseudouridine synthesis	10	1	1					1	1																	2
437	BP	GO:0040031	snRNA modification	9	1	1					1	1																	2
438	BP	GO:0031120	snRNA pseudouridine synthesis	10	1	1					1	1																	1
439	BP	GO:0001510	RNA methylation	9	1	1									1	1											1	1	54
440	BP	GO:0036265	RNA (guanine-N7)-methylation	10	1	1																							4
441	BP	GO:0034655	nucleobase-containing compound catabolic process	6	1	3	0.487	4	0.0361	5	1	3	1	3	1	2	1	2	1	4	1e-07	9	0.748	4	0.149	5	1	2	398
442	BP	GO:0006401	RNA catabolic process	7	1	3	1	3	0.00318	5	1	1			1	2			0.174	4	6.2e-08	8	0.11	4	0.286	4	1	2	241
443	BP	GO:0043633	polyadenylation-dependent RNA catabolic process	8			1	1																					7
444	BP	GO:0034661	ncRNA catabolic process	8			1	1																					24
445	BP	GO:0043634	polyadenylation-dependent ncRNA catabolic process	9			1	1																					6
446	BP	GO:0016075	rRNA catabolic process	9			1	1																					17
447	BP	GO:0071034	CUT catabolic process	9			1	1																					4
448	BP	GO:0071025	RNA surveillance	8			1	1																					15
449	BP	GO:0071027	nuclear RNA surveillance	9			1	1																					13
450	BP	GO:0071029	nuclear ncRNA surveillance	10			1	1																					6
451	BP	GO:0071046	nuclear polyadenylation-dependent ncRNA catabolic process	11			1	1																					6
452	BP	GO:0071035	nuclear polyadenylation-dependent rRNA catabolic process	12			1	1																					6
453	BP	GO:0006402	mRNA catabolic process	8	1	3	1	2	0.0549	4	1	1			1	1			0.106	4	2.23e-08	8	0.0669	4	0.175	4	1	1	212
454	BP	GO:0000956	nuclear-transcribed mRNA catabolic process	9	1	2	1	2	0.0404	4	1	1			1	1			0.0783	4	1.19e-08	8	0.0492	4	0.129	4	1	1	196
455	BP	GO:0000184	nuclear-transcribed mRNA catabolic process, nonsense-mediated decay	10	1	2	1	2	0.00642	4					1	1			0.454	3	2.74e-10	8	0.00785	4	0.0208	4			123
456	BP	GO:0000291	nuclear-transcribed mRNA catabolic process, exonucleolytic	10															1	1							1	1	32
457	BP	GO:0000288	nuclear-transcribed mRNA catabolic process, deadenylation-dependent decay	10							1	1							1	1			1	1			1	1	67
458	BP	GO:0043928	exonucleolytic nuclear-transcribed mRNA catabolic process involved in deadenylation-dependent decay	11															1	1							1	1	30
459	BP	GO:0000289	nuclear-transcribed mRNA poly(A) tail shortening	10							1	1											1	1					32
460	BP	GO:0071044	histone mRNA catabolic process	10			1	1																					10
461	BP	GO:0071028	nuclear mRNA surveillance	10			1	1																					13
462	BP	GO:0071030	nuclear mRNA surveillance of spliceosomal pre-mRNA splicing	11			1	1																					3
463	BP	GO:0071033	nuclear retention of pre-mRNA at the site of transcription	11			1	1																					5
464	BP	GO:0071048	nuclear retention of unspliced pre-mRNA at the site of transcription	12			1	1																					3
465	BP	GO:0006308	DNA catabolic process	7							1	1	0.0044	3	1	1	0.849	2			1	1					1	1	32
466	BP	GO:0000738	DNA catabolic process, exonucleolytic	8											1	1											1	1	2
467	BP	GO:0000737	DNA catabolic process, endonucleolytic	8									0.00158	3			0.436	2			1	1							23
468	BP	GO:0034654	nucleobase-containing compound biosynthetic process	6	4.19e-20	34	2.98e-08	20	7.28e-11	23	4.41e-14	29	0.00132	15	1.84e-06	21	3.28e-08	22	0.000151	18	1.17e-13	26	0.000114	17	1.58e-09	25	4.96e-08	20	4310
469	BP	GO:0032774	RNA biosynthetic process	7	1.17e-16	30	4.91e-09	20	1.1e-10	22	3.87e-14	28	0.00242	14	2.22e-06	20	4.68e-09	22	3.33e-05	18	1.05e-14	26	0.00119	15	1.02e-07	22	8.32e-08	19	3903
470	BP	GO:0097659	nucleic acid-templated transcription	8	9.1e-15	28	2.75e-09	20	7.18e-07	18	1.7e-14	28	0.00166	14	9.05e-06	19	2.32e-08	21	0.00448	15	1.24e-05	17	0.132	12	3e-06	20	4.82e-08	19	3781
471	BP	GO:0006351	transcription, DNA-templated	9	8.21e-15	28	2.78e-08	19	5.79e-06	17	1.87e-13	27	0.00158	14	8.48e-06	19	2.15e-08	21	0.00427	15	1.17e-05	17	0.127	12	2.81e-06	20	4.5e-08	19	3766
472	BP	GO:0098781	ncRNA transcription	10	1	1									1	1													40
473	BP	GO:0009303	rRNA transcription	11	1	1									1	1													30
474	BP	GO:0006360	transcription from RNA polymerase I promoter	10	1	1			1	1			1	1															59
475	BP	GO:0006383	transcription from RNA polymerase III promoter	10	1	2							1	1															56
476	BP	GO:0009299	mRNA transcription	10							1	1																	20
477	BP	GO:0006366	transcription from RNA polymerase II promoter	10	2.34e-08	17	0.000644	11	0.00902	10	2.32e-10	19	0.0535	9	0.00211	12	0.000709	12	0.00714	11	0.00168	11	0.628	8	7.24e-07	16	0.354	8	2036
478	BP	GO:0006352	DNA-templated transcription, initiation	8	0.666	4	1	2	1	2			0.242	4	1	1	1	2	1	1	1	2	1	2	1	3	1	1	321
479	BP	GO:0006367	transcription initiation from RNA polymerase II promoter	9	0.391	4	1	2	1	1			1	3	1	1	1	2	1	1	1	1	1	1	1	3	1	1	279
480	BP	GO:0006361	transcription initiation from RNA polymerase I promoter	9	1	1			1	1			1	1															34
481	BP	GO:0006354	DNA-templated transcription, elongation	8	1.83e-07	7			1	2	0.83	3	0.328	3	1	1					1	2	1	1	1	2	1	2	134
482	BP	GO:0006368	transcription elongation from RNA polymerase II promoter	9	9.92e-05	5			1	1	1	2	0.118	3							1	2	1	1	1	2	1	1	95
483	BP	GO:0006385	transcription elongation from RNA polymerase III promoter	9	1	1							1	1															18
484	BP	GO:0006362	transcription elongation from RNA polymerase I promoter	9	1	1			1	1			1	1															31
485	BP	GO:0006353	DNA-templated transcription, termination	8	0.000105	5	0.11	3	0.135	3	1.87e-12	9	1	1	2.11e-08	7	1e-08	7	1.2e-08	7	1	1	1	2	0.00779	4	0.00211	4	96
486	BP	GO:0006369	termination of RNA polymerase II transcription	9	0.0319	3	0.0129	3	1	2	2.04e-15	9			2.13e-08	6	5.49e-11	7	6.55e-11	7	1	1	1	2	0.000435	4	0.0143	3	47
487	BP	GO:0006386	termination of RNA polymerase III transcription	9	1	1							1	1															18
488	BP	GO:0006363	termination of RNA polymerase I transcription	9	1	1			1	1			1	1															31
489	BP	GO:0043101	purine-containing compound salvage	7					1	1													1	1					16
490	BP	GO:0071897	DNA biosynthetic process	7	1	3					1	1	1	1											1	2	1	1	153
491	BP	GO:0009225	nucleotide-sugar metabolic process	6																					1	1			32
492	BP	GO:0006011	UDP-glucose metabolic process	7																					1	1			6
493	BP	GO:0097359	UDP-glucosylation	8																					1	1			2
494	BP	GO:0006575	cellular modified amino acid metabolic process	4	1	1	1	1	0.27	4			1	2	1	1	1	2	0.0294	5	3.14e-10	10	0.000666	6	0.00276	6			320
495	BP	GO:0042398	cellular modified amino acid biosynthetic process	5																			1	1					56
496	BP	GO:0042219	cellular modified amino acid catabolic process	5									1	1			1	1	1	1	1	1			1	1			20
497	BP	GO:0006749	glutathione metabolic process	5																					1	1			59
498	BP	GO:0044262	cellular carbohydrate metabolic process	4			1	1			1	1			1	2			1	1			1	1	1	1			292
499	BP	GO:0044264	cellular polysaccharide metabolic process	5							1	1			1	1													103
500	BP	GO:0006073	cellular glucan metabolic process	6							1	1			1	1													87
501	BP	GO:0046835	carbohydrate phosphorylation	5											1	1			1	1			1	1					22
502	BP	GO:0044275	cellular carbohydrate catabolic process	5			1	1			1	1													1	1			77
503	BP	GO:0044247	cellular polysaccharide catabolic process	6							1	1																	30
504	BP	GO:0006413	translational initiation	4	1	2	1	1	0.00585	5	1	1	1	1	1	1			0.0137	5	1.67e-07	8	1	3	1	2			273
505	BP	GO:0044699	single-organism process	2	1.54e-08	39	2.2e-05	29	3.06e-06	31	1.33e-10	42	3.82e-09	34	2.63e-13	45	2.6e-08	37	4.25e-18	48	1.32e-11	38	2.36e-15	42	4.48e-19	52	2.99e-08	33	13769
506	BP	GO:0016265	death	3	1	8	1	3	1	1	0.0865	10	0.000801	11	1	8	0.00516	11	0.267	9	0.55	8	1	3	1	5	1	7	2026
507	BP	GO:0044710	single-organism metabolic process	3	0.000159	21	1	10	0.896	13	0.000239	21	4.46e-05	19	8.03e-06	23	1.45e-07	24	7.24e-05	21	5.05e-07	22	7.67e-07	22	6.32e-07	25	0.00158	17	5684
508	BP	GO:0042440	pigment metabolic process	4					1	1													1	1					69
509	BP	GO:0019748	secondary metabolic process	4			1	1															1	1	1	1			58
510	BP	GO:0030638	polyketide metabolic process	5																			1	1					10
511	BP	GO:0044712	single-organism catabolic process	4	1	2	1	4	1	3	0.458	7	0.632	6	1	4	0.0286	8	1	6	1	3	1	5	1	2	1	3	1178
512	BP	GO:0030214	hyaluronan catabolic process	5											1	1													16
513	BP	GO:1901657	glycosyl compound metabolic process	4	1	2	1	2	1	1			1	1	1	1			1	1			1	3	1	1	1	1	409
514	BP	GO:0016137	glycoside metabolic process	5																			1	1					17
515	BP	GO:0030647	aminoglycoside antibiotic metabolic process	6																			1	1					10
516	BP	GO:0044711	single-organism biosynthetic process	4	0.836	8	1	2	1	3	1	4	1	4	1	5	1	5	1	4	1	6	1	3	1	7	1	3	1776
517	BP	GO:1901659	glycosyl compound biosynthetic process	5	1	1			1	1													1	1					130
518	BP	GO:0006023	aminoglycan biosynthetic process	5																					1	1			115
519	BP	GO:0006024	glycosaminoglycan biosynthetic process	6																					1	1			114
520	BP	GO:0030213	hyaluronan biosynthetic process	7																					1	1			14
521	BP	GO:0046148	pigment biosynthetic process	5					1	1													1	1					53
522	BP	GO:0044723	single-organism carbohydrate metabolic process	4	1	1	1	1			1	1	1	4	1	2	1	3	0.292	6	1	3	1	1	1	4	1	2	829
523	BP	GO:0044724	single-organism carbohydrate catabolic process	5	1	1	1	1			1	1	1	1	1	1			1	1			1	1	1	1			138
524	BP	GO:0070085	glycosylation	5									1	2			1	2	1	3	1	1			1	1	1	2	429
525	BP	GO:0036065	fucosylation	6													1	1	1	1							1	1	24
526	BP	GO:0043413	macromolecule glycosylation	6									1	2			1	2	1	3	1	1			1	1	1	2	424
527	BP	GO:0016051	carbohydrate biosynthetic process	5							1	1	1	1	1	1	1	1	1	2	1	1			1	2			205
528	BP	GO:0000271	polysaccharide biosynthetic process	6							1	1			1	1									1	1			78
529	BP	GO:0045730	respiratory burst	4																	1	1					1	1	32
530	BP	GO:0055114	oxidation-reduction process	4	1	3	1	2	1	2	1	3	1	2	1	6	1	6	1	2	1	3	1	5	1	5	1	2	1111
531	BP	GO:0044281	small molecule metabolic process	4	1	6	1	5	1	8	1	3	1	5	0.0375	12	0.39	10	0.0982	11	7.71e-07	16	9.64e-06	15	0.0566	12	1	4	2701
532	BP	GO:0044282	small molecule catabolic process	5	1	2	1	3	1	2			1	2	1	1	0.728	4	1	2	1	3	1	2	1	2	1	1	356
533	BP	GO:0044283	small molecule biosynthetic process	5	1	2							1	2	1	1	1	4	1	3	1	4	1	1	1	3			553
534	BP	GO:0018904	ether metabolic process	5																			1	1					13
535	BP	GO:0006662	glycerol ether metabolic process	6																			1	1					12
536	BP	GO:0006766	vitamin metabolic process	5	1	1							1	1			1	1	1	1	1	1	1	1	1	1			175
537	BP	GO:0006775	fat-soluble vitamin metabolic process	6																			1	1					78
538	BP	GO:0006767	water-soluble vitamin metabolic process	6	1	1							1	1			1	1	1	1	1	1			1	1			97
539	BP	GO:0006066	alcohol metabolic process	5													1	1			1	1	1	1	1	2	1	1	393
540	BP	GO:1902652	secondary alcohol metabolic process	6													1	1			1	1			1	1			128
541	BP	GO:0019751	polyol metabolic process	6																			1	1					107
542	BP	GO:0034308	primary alcohol metabolic process	6																							1	1	46
543	BP	GO:0006067	ethanol metabolic process	7																							1	1	14
544	BP	GO:0006069	ethanol oxidation	8																							1	1	12
545	BP	GO:0046165	alcohol biosynthetic process	6																	1	1			1	1			153
546	BP	GO:1902653	secondary alcohol biosynthetic process	7																	1	1			1	1			50
547	BP	GO:0046164	alcohol catabolic process	6																							1	1	56
548	BP	GO:0034310	primary alcohol catabolic process	7																							1	1	9
549	BP	GO:0006068	ethanol catabolic process	8																							1	1	5
550	BP	GO:0005996	monosaccharide metabolic process	5			1	1			1	1	1	2	1	2	1	1	1	3	1	2	1	1	1	2			317
551	BP	GO:0019321	pentose metabolic process	6																					1	1			13
552	BP	GO:0046365	monosaccharide catabolic process	6			1	1					1	1	1	1			1	1			1	1	1	1			61
553	BP	GO:0046364	monosaccharide biosynthetic process	6									1	1			1	1	1	2	1	1			1	1			95
554	BP	GO:0019322	pentose biosynthetic process	7																					1	1			4
555	BP	GO:0019318	hexose metabolic process	6			1	1			1	1	1	2	1	2	1	1	1	3	1	2	1	1	1	2			270
556	BP	GO:0019320	hexose catabolic process	7			1	1					1	1	1	1			1	1			1	1	1	1			51
557	BP	GO:0006006	glucose metabolic process	7			1	1			1	1	1	2	1	2	1	1	1	3	1	2			1	2			232
558	BP	GO:0006007	glucose catabolic process	8			1	1					1	1	1	1			1	1					1	1			34
559	BP	GO:0006012	galactose metabolic process	7																			1	1					13
560	BP	GO:0019388	galactose catabolic process	8																			1	1					6
561	BP	GO:0019319	hexose biosynthetic process	7									1	1			1	1	1	2	1	1							88
562	BP	GO:0006094	gluconeogenesis	8									1	1			1	1	1	2	1	1							85
563	BP	GO:0070988	demethylation	4	1	1	1	1									1	1	1	1			1	1			1	1	69
564	BP	GO:0070989	oxidative demethylation	5	1	1																							15
565	BP	GO:0006629	lipid metabolic process	4	1	2			1	4	1	2	1	3	1	2	1	3	1	2	1	5	1	3	1	3			1363
566	BP	GO:0008202	steroid metabolic process	5													1	2			1	1	1	1	1	2			297
567	BP	GO:0016125	sterol metabolic process	6													1	1			1	1			1	1			139
568	BP	GO:0008203	cholesterol metabolic process	7													1	1			1	1			1	1			125
569	BP	GO:0008610	lipid biosynthetic process	5	1	1			1	1	1	1					1	2	1	2	1	2			1	1			659
570	BP	GO:0006694	steroid biosynthetic process	6													1	1			1	1			1	1			156
571	BP	GO:0016126	sterol biosynthetic process	7																	1	1			1	1			55
572	BP	GO:0006695	cholesterol biosynthetic process	8																	1	1			1	1			50
573	BP	GO:0016042	lipid catabolic process	5					1	3	1	1	1	1			1	2			1	1	1	1					299
574	BP	GO:0044700	single organism signaling	3	1	12	1	10	1	10	0.0264	19	1	10	1	16	0.0246	18	0.000465	21	1	10	0.0245	17	1	16	0.551	14	6337
575	BP	GO:0098602	single organism cell adhesion	3	1	1			1	2	1	1	1	2	1	2	1	2	1	5	1	4	0.108	6			1	3	782
576	BP	GO:0016337	single organismal cell-cell adhesion	4	1	1			1	2	1	1	1	2	1	2	1	2	1	4	1	4	0.0744	6			1	3	731
577	BP	GO:0034109	homotypic cell-cell adhesion	5					1	1			1	2	1	2	1	2	1	3	1	3	0.172	5			1	3	525
578	BP	GO:0034117	erythrocyte aggregation	6															1	1			1	1					2
579	BP	GO:0086042	cardiac muscle cell-cardiac muscle cell adhesion	6																	1	1	1	1			1	1	7
580	BP	GO:0007159	leukocyte cell-cell adhesion	5					1	1			1	2	1	2	1	2	1	4	1	2	1	3			1	2	492
581	BP	GO:0070486	leukocyte aggregation	6					1	1			1	2	1	2	1	2	1	3	1	2	1	2			1	2	459
582	BP	GO:0071593	lymphocyte aggregation	7					1	1			1	2	1	1	1	2	1	3	1	2	1	2			1	2	452
583	BP	GO:0070487	monocyte aggregation	7											1	1													5
584	BP	GO:0090136	epithelial cell-cell adhesion	5																	1	1	1	1			1	1	15
585	BP	GO:0071603	endothelial cell-cell adhesion	6																	1	1	1	1			1	1	4
586	BP	GO:0034113	heterotypic cell-cell adhesion	5											1	1					1	1	1	1			1	1	47
587	BP	GO:1902578	single-organism localization	3	1	10	1	5	0.194	12	1	12	0.00545	14	0.155	14	0.221	13	2.85e-15	29	0.000367	16	1.37e-06	19	0.0137	16	0.0301	13	4182
588	BP	GO:0044765	single-organism transport	4	1	9	1	5	0.127	12	1	11	0.00325	14	0.0964	14	0.141	13	8.68e-16	29	0.000201	16	6.54e-07	19	0.036	15	0.098	12	4002
589	BP	GO:0006818	hydrogen transport	5	1	1											1	1	1	1									159
590	BP	GO:0051030	snRNA transport	5	1	1																							3
591	BP	GO:0015849	organic acid transport	5					1	1			1	2	1	1	1	3	0.434	4	1	1	1	1			1	1	306
592	BP	GO:1902582	single-organism intracellular transport	5	0.735	8	1	4	0.0194	9	0.0239	10	0.817	7	0.000405	12	1	7	1.32e-14	21	2.44e-07	14	3.84e-06	13	0.00489	11	0.121	8	1742
593	BP	GO:1902593	single-organism nuclear import	6	0.381	4									1	1	1	1			1	3	1	2			1	1	277
594	BP	GO:0071426	ribonucleoprotein complex export from nucleus	6	9.4e-05	5	0.104	3	1	2	1.79e-10	8			0.000111	5	6.38e-05	5	7.05e-05	5			1	2	0.00716	4	0.00194	4	94
595	BP	GO:0071428	rRNA-containing ribonucleoprotein complex export from nucleus	7	1	1																							11
596	BP	GO:0071427	mRNA-containing ribonucleoprotein complex export from nucleus	7	4.72e-05	5	0.069	3	1	2	5.8e-11	8			5.59e-05	5	3.2e-05	5	3.54e-05	5			1	2	0.00415	4	0.00112	4	82
597	BP	GO:0006406	mRNA export from nucleus	8	4.72e-05	5	0.069	3	1	2	5.8e-11	8			5.59e-05	5	3.2e-05	5	3.54e-05	5			1	2	0.00415	4	0.00112	4	82
598	BP	GO:0030705	cytoskeleton-dependent intracellular transport	6															1	2									126
599	BP	GO:0016197	endosomal transport	6					1	2			1	2	1	2			0.00894	5			1	2	1	1	1	1	250
600	BP	GO:0032456	endocytic recycling	7															0.598	2							1	1	27
601	BP	GO:0044795	trans-Golgi network to recycling endosome transport	7															1	1									1
602	BP	GO:0048227	plasma membrane to endosome transport	7																							1	1	8
603	BP	GO:0045022	early endosome to late endosome transport	7					1	1			1	1	1	1			1	1			1	2					39
604	BP	GO:1990126	retrograde transport, endosome to plasma membrane	7															1	1									14
605	BP	GO:0042147	retrograde transport, endosome to Golgi	7					1	2			1	1	1	1									1	1			68
606	BP	GO:0007034	vacuolar transport	6					1	1			1	1															90
607	BP	GO:0007041	lysosomal transport	7					1	1			1	1															64
608	BP	GO:0008333	endosome to lysosome transport	8					1	1			1	1															42
609	BP	GO:0006839	mitochondrial transport	6	1	1					1	2	1	3	0.48	4			1	3	1	2	0.204	4	1	1	1	2	283
610	BP	GO:0032066	nucleolus to nucleoplasm transport	6																					1	1			3
611	BP	GO:0048193	Golgi vesicle transport	6			1	1			1	1	1	2	1	1	1	1	2.67e-06	8	1	1	1	1	1	2	1	2	336
612	BP	GO:0006890	retrograde vesicle-mediated transport, Golgi to ER	7									1	1															36
613	BP	GO:0006891	intra-Golgi vesicle-mediated transport	7																					1	1			47
614	BP	GO:0000301	retrograde transport, vesicle recycling within Golgi	8																					1	1			24
615	BP	GO:0006892	post-Golgi vesicle-mediated transport	7			1	1					1	2	1	1	1	1	0.00024	5			1	1	1	2			120
616	BP	GO:0006893	Golgi to plasma membrane transport	8											1	1	1	1	0.0291	3					1	1			49
617	BP	GO:0006895	Golgi to endosome transport	8															1	1									20
618	BP	GO:0006888	ER to Golgi vesicle-mediated transport	7									1	1					1	2	1	1					1	2	171
619	BP	GO:0006605	protein targeting	6	1	4			0.532	5	1	2	1	3	1	5	1	2	0.0107	7	1.22e-09	12	8.6e-07	10	1	4	1	3	706
620	BP	GO:0006611	protein export from nucleus	6	1	2							1	2	1	2					1	1							56
621	BP	GO:0006408	snRNA export from nucleus	6	1	1																							2
622	BP	GO:0016973	poly(A)+ mRNA export from nucleus	6			1	1	1	1																			14
623	BP	GO:1901571	fatty acid derivative transport	5					1	1									1	1									42
624	BP	GO:0015850	organic hydroxy compound transport	5																			1	1					236
625	BP	GO:0006811	ion transport	5	1	1			1	2	1	1	1	5	1	2	1	4	1	7	1	2	1	2	1	2	1	4	1549
626	BP	GO:0099587	inorganic ion import into cell	6									1	1															13
627	BP	GO:0006820	anion transport	6					1	1			1	2	1	1	1	3	1	4	1	1	1	1			1	1	582
628	BP	GO:0015711	organic anion transport	7					1	1			1	2	1	1	1	3	1	4	1	1	1	1			1	1	426
629	BP	GO:0046942	carboxylic acid transport	8					1	1			1	2	1	1	1	3	0.424	4	1	1	1	1			1	1	304
630	BP	GO:0071715	icosanoid transport	9					1	1									1	1									42
631	BP	GO:0006842	tricarboxylic acid transport	9															1	1									4
632	BP	GO:0015746	citrate transport	10															1	1									4
633	BP	GO:0015718	monocarboxylic acid transport	9					1	1			1	2	1	1	0.856	3	0.877	3	1	1	1	1			1	1	154
634	BP	GO:0006812	cation transport	6	1	1			1	1	1	1	1	3	1	1	1	1	1	3	1	1	1	1	1	2	1	3	1052
635	BP	GO:0072511	divalent inorganic cation transport	7					1	1															1	1	1	1	430
636	BP	GO:0072512	trivalent inorganic cation transport	7									1	1					1	1	1	1	1	1	1	1	1	1	38
637	BP	GO:0098659	inorganic cation import into cell	7									1	1															13
638	BP	GO:0015672	monovalent inorganic cation transport	7	1	1					1	1					1	1	1	1							1	1	584
639	BP	GO:0015992	proton transport	8	1	1											1	1	1	1									157
640	BP	GO:0030001	metal ion transport	7					1	1	1	1	1	3					1	2	1	1	1	1	1	2	1	2	813
641	BP	GO:0000041	transition metal ion transport	8									0.183	3					1	1	1	1	1	1	1	1	1	1	110
642	BP	GO:0006826	iron ion transport	9									0.0256	3					1	1	1	1	1	1	1	1	1	1	57
643	BP	GO:0015682	ferric iron transport	10									1	1					1	1	1	1	1	1	1	1	1	1	38
644	BP	GO:0033572	transferrin transport	11									1	1					1	1	1	1	1	1	1	1	1	1	36
645	BP	GO:0097286	iron ion import	10									0.0531	2					1	1	1	1	1	1			1	1	10
646	BP	GO:0097459	iron ion import into cell	11									1	1															7
647	BP	GO:0070838	divalent metal ion transport	8					1	1															1	1	1	1	427
648	BP	GO:0006816	calcium ion transport	9					1	1															1	1	1	1	380
649	BP	GO:0070509	calcium ion import	10					1	1																			151
650	BP	GO:0060401	cytosolic calcium ion transport	10					1	1																			126
651	BP	GO:1903515	calcium ion transport from cytosol to endoplasmic reticulum	11					1	1																			1
652	BP	GO:0070296	sarcoplasmic reticulum calcium ion transport	10					1	1																			33
653	BP	GO:1990036	calcium ion import into sarcoplasmic reticulum	11					1	1																			3
654	BP	GO:0006813	potassium ion transport	8							1	1															1	1	217
655	BP	GO:0006836	neurotransmitter transport	5					1	1															1	1			183
656	BP	GO:0046903	secretion	5	1	1			1	5	1	1	1	5	1	2	1	4	0.0021	9			1	3	1	3	1	1	1096
657	BP	GO:0046717	acid secretion	6					1	1									1	1									115
658	BP	GO:0032309	icosanoid secretion	7					1	1									1	1									38
659	BP	GO:0008643	carbohydrate transport	5	1	2									1	1	1	1	1	1	1	1							191
660	BP	GO:0015749	monosaccharide transport	6	1	2									1	1	1	1	1	1	1	1							153
661	BP	GO:0008645	hexose transport	7	1	2									1	1	1	1	1	1	1	1							151
662	BP	GO:0015758	glucose transport	8	1	2									1	1	1	1	1	1	1	1							149
663	BP	GO:0046323	glucose import	9											1	1													76
664	BP	GO:0042886	amide transport	5	1	1							1	1			1	1	1	1			1	1					368
665	BP	GO:0015833	peptide transport	6	1	1							1	1			1	1	1	1			1	1					344
666	BP	GO:0002790	peptide secretion	7	1	1							1	1			1	1	1	1									281
667	BP	GO:0006909	phagocytosis	5					1	1			1	3			1	2	1	3					1	1	1	1	240
668	BP	GO:0043277	apoptotic cell clearance	6									1	1			0.96	2	0.952	2							1	1	34
669	BP	GO:0006869	lipid transport	5					1	1			1	3	1	1	1	3	1	3	1	1	1	2			1	1	309
670	BP	GO:0015918	sterol transport	6																			1	1					72
671	BP	GO:0030301	cholesterol transport	7																			1	1					70
672	BP	GO:0015908	fatty acid transport	6					1	1			1	2	1	1	0.138	3	0.142	3	1	1					1	1	83
673	BP	GO:0015909	long-chain fatty acid transport	7									1	1	1	1	1	2	1	1							1	1	51
674	BP	GO:0044539	long-chain fatty acid import	8													1	1											7
675	BP	GO:0015732	prostaglandin transport	7					1	1									1	1									19
676	BP	GO:0032310	prostaglandin secretion	8					1	1									1	1									16
677	BP	GO:0015721	bile acid and bile salt transport	6																			1	1					32
678	BP	GO:0072321	chaperone-mediated protein transport	5																					1	1			9
679	BP	GO:0017038	protein import	5	0.706	4	1	1	1	1					1	1	1	1			1	3	1	3			1	1	326
680	BP	GO:1902580	single-organism cellular localization	4	1	5			1	6	1	4	1	4	1	6	1	3	3.55e-08	14	1.17e-06	12	1.97e-05	11	0.145	8	1	5	1284
681	BP	GO:0099518	vesicle cytoskeletal trafficking	5															1	1									41
682	BP	GO:0044744	protein targeting to nucleus	5	0.381	4									1	1	1	1			1	3	1	2			1	1	277
683	BP	GO:0048489	synaptic vesicle transport	5					1	1																			108
684	BP	GO:0045047	protein targeting to ER	5					0.00474	4					1	1	1	1	0.363	3	1.47e-10	8	0.259	3	1	2			114
685	BP	GO:0006623	protein targeting to vacuole	5					1	1			1	1															26
686	BP	GO:0006622	protein targeting to lysosome	6					1	1			1	1															15
687	BP	GO:0000042	protein targeting to Golgi	5																					1	1			19
688	BP	GO:0006606	protein import into nucleus	5	0.381	4									1	1	1	1			1	3	1	2			1	1	277
689	BP	GO:0006607	NLS-bearing protein import into nucleus	6	1	1																							23
690	BP	GO:0042991	transcription factor import into nucleus	6																			1	1					100
691	BP	GO:0043473	pigmentation	3															1	1									96
692	BP	GO:0008283	cell proliferation	3	0.0589	10	1	3	1	3	1	8	1	7	1	5	1	7	1	7	1	6	1	4	1	7	1	6	1990
693	BP	GO:0033002	muscle cell proliferation	4	1	1					1	1													1	1	1	1	153
694	BP	GO:0014855	striated muscle cell proliferation	5							1	1																	52
695	BP	GO:0048659	smooth muscle cell proliferation	5	1	1																			1	1	1	1	105
696	BP	GO:1990874	vascular smooth muscle cell proliferation	6																							1	1	3
697	BP	GO:0070661	leukocyte proliferation	4	1	1							1	2			1	2	1	1	1	1	1	1			1	2	279
698	BP	GO:0032943	mononuclear cell proliferation	5	1	1							1	2			1	2	1	1	1	1	1	1			1	2	267
699	BP	GO:0061351	neural precursor cell proliferation	4															1	1			1	1					151
700	BP	GO:0072089	stem cell proliferation	4									1	1	1	1	1	1	1	2					1	1			153
701	BP	GO:0033687	osteoblast proliferation	4	1	1															1	1							26
702	BP	GO:0048144	fibroblast proliferation	4							1	1	1	1													1	1	90
703	BP	GO:0050673	epithelial cell proliferation	4	1	1					1	1	1	2			1	3	1	1							1	2	354
704	BP	GO:0043616	keratinocyte proliferation	5							1	1																	38
705	BP	GO:0001935	endothelial cell proliferation	5	1	1							1	2			0.345	3	1	1							1	1	113
706	BP	GO:0044767	single-organism developmental process	3	0.346	16	0.00847	16	0.314	14	0.13	17	0.237	14	1	14	0.00804	18	3.65e-06	23	1	13	0.00032	19	0.0632	18	0.012	16	5849
707	BP	GO:0021700	developmental maturation	4							1	1	1	1											1	1			245
708	BP	GO:0043696	dedifferentiation	4			1	1	1	1																			2
709	BP	GO:0031099	regeneration	4							1	2	1	1															184
710	BP	GO:0007568	aging	4	1	2	1	1					1	2					1	1	1	1	1	1	1	1	1	1	301
711	BP	GO:0048589	developmental growth	4					1	1	1	1					1	1	1	2	1	2	1	3	1	1	1	2	611
712	BP	GO:0060560	developmental growth involved in morphogenesis	5															1	1					1	1			219
713	BP	GO:0061061	muscle structure development	4	1	1			1	1	1	2			1	3	1	1	1	1	1	1	1	4	1	2	1	2	594
714	BP	GO:0060322	head development	4	1	4	1	2	1	2							1	1			1	1	1	1	1	2			762
715	BP	GO:0048857	neural nucleus development	4																					1	1			71
716	BP	GO:0010171	body morphogenesis	4							1	1																	55
717	BP	GO:0048729	tissue morphogenesis	4	1	1					1	2			1	2			1	1	1	1	1	1	1	2			632
718	BP	GO:0002009	morphogenesis of an epithelium	5	1	1					1	2			1	2			1	1	1	1	1	1	1	2			490
719	BP	GO:0001738	morphogenesis of a polarized epithelium	6															1	1			1	1					51
720	BP	GO:0002011	morphogenesis of an epithelial sheet	6	1	1															1	1			1	1			48
721	BP	GO:0090504	epiboly	7	1	1															1	1							25
722	BP	GO:0048730	epidermis morphogenesis	6							1	1			1	1									1	1			33
723	BP	GO:0044763	single-organism cellular process	3	4.96e-09	38	0.0018	25	1.04e-05	29	6.57e-08	37	2.13e-09	33	2.64e-10	40	2.04e-06	33	2.35e-14	43	4.97e-10	35	1.6e-11	37	3.69e-10	41	8.29e-07	30	12573
724	BP	GO:0035513	oxidative RNA demethylation	4	1	1																							2
725	BP	GO:0035553	oxidative single-stranded RNA demethylation	5	1	1																							2
726	BP	GO:0042439	ethanolamine-containing compound metabolic process	4																					1	1			89
727	BP	GO:0019400	alditol metabolic process	4																			1	1					20
728	BP	GO:0006059	hexitol metabolic process	5																			1	1					3
729	BP	GO:0019402	galactitol metabolic process	6																			1	1					1
730	BP	GO:0007059	chromosome segregation	4	1	3	1	1			0.0239	5	0.141	4	1	1	1	2	1	1					1	2	1	1	279
731	BP	GO:0007049	cell cycle	4	4.83e-05	13	1	4	1	3	0.0044	11	0.15	8	1	6	1	7	1	7	1	2	1	4	1	6	0.15	8	1796
732	BP	GO:0000278	mitotic cell cycle	5	0.00018	10	1	3	1	1	0.0247	8	0.0329	7	1	3	1	5	1	5	1	1	1	3	1	4	1	2	1038
733	BP	GO:0007163	establishment or maintenance of cell polarity	4	1	1									1	1	1	1	1	3			1	2	1	3	1	2	164
734	BP	GO:0061245	establishment or maintenance of bipolar cell polarity	5																			1	1	1	1			35
735	BP	GO:0035088	establishment or maintenance of apical/basal cell polarity	6																			1	1	1	1			35
736	BP	GO:0045197	establishment or maintenance of epithelial cell apical/basal polarity	7																			1	1	1	1			28
737	BP	GO:0061339	establishment or maintenance of monopolar cell polarity	5																			1	1					13
738	BP	GO:0030011	maintenance of cell polarity	5																					1	1			12
739	BP	GO:0035090	maintenance of apical/basal cell polarity	6																					1	1			8
740	BP	GO:0045199	maintenance of epithelial cell apical/basal polarity	7																					1	1			8
741	BP	GO:0030010	establishment of cell polarity	5													1	1	0.293	3			1	1			1	1	106
742	BP	GO:0090162	establishment of epithelial cell polarity	6															1	1			1	1					21
743	BP	GO:0061162	establishment of monopolar cell polarity	6																			1	1					13
744	BP	GO:0035089	establishment of apical/basal cell polarity	7																			1	1					11
745	BP	GO:0060352	cell adhesion molecule production	4															1	1									8
746	BP	GO:0045103	intermediate filament-based process	4													1	1	1	1					1	1	1	1	44
747	BP	GO:0007154	cell communication	4	1	12	1	12	1	10	0.00791	20	1	11	0.119	18	0.0295	18	2.18e-05	23	1	10	0.00136	19	0.215	18	0.165	15	6420
748	BP	GO:0007267	cell-cell signaling	5	1	2			1	2	1	2	1	1	1	1	1	3	1	2	1	2	1	2	1	4			1229
749	BP	GO:0099536	synaptic signaling	6					1	1	1	2			1	1	1	1	1	1	1	1	1	1	1	3			716
750	BP	GO:0099537	trans-synaptic signaling	7					1	1	1	2			1	1	1	1	1	1	1	1	1	1	1	3			716
751	BP	GO:0007268	synaptic transmission	8					1	1	1	2			1	1	1	1	1	1	1	1	1	1	1	3			716
752	BP	GO:0022406	membrane docking	4					1	1	1	1	1	2					1	2			1	2					71
753	BP	GO:0022614	membrane to membrane docking	5																			1	1					5
754	BP	GO:0022615	protein to membrane docking	5					1	1			1	1															8
755	BP	GO:0048278	vesicle docking	5							1	1	1	1					1	2			1	1					58
756	BP	GO:0051301	cell division	4	1	4	1	1	1	1	0.00101	8	1	4	1	2	1	2	1	1			1	1	1	2	1	1	672
757	BP	GO:0008356	asymmetric cell division	5															1	1									18
758	BP	GO:0017145	stem cell division	5									1	1					1	1									36
759	BP	GO:0098722	asymmetric stem cell division	6															1	1									8
760	BP	GO:0048103	somatic stem cell division	6									1	1					1	1									22
761	BP	GO:0036445	neuronal stem cell division	7															1	1									13
762	BP	GO:0034637	cellular carbohydrate biosynthetic process	4							1	1			1	1													80
763	BP	GO:0033692	cellular polysaccharide biosynthetic process	5							1	1			1	1													68
764	BP	GO:0009250	glucan biosynthetic process	6							1	1			1	1													54
765	BP	GO:0030029	actin filament-based process	4					1	2	1	1			1	2	1	2	1	3	1	1	1	2	1	4	1	3	639
766	BP	GO:0007017	microtubule-based process	4	1	4	1	1			0.0945	6	1	2	1	3	1	2	1	2			1	2	1	3	1	1	617
767	BP	GO:0001775	cell activation	4	1	1			1	1	1	1	1	4	1	3	1	5	1	5	1	2	1	3	1	1	1	4	989
768	BP	GO:0045321	leukocyte activation	5	1	1			1	1	1	1	1	3	1	2	1	3	1	5	1	2	1	2	1	1	1	3	750
769	BP	GO:0002274	myeloid leukocyte activation	6									1	1			0.956	3	1	2					1	1	1	2	160
770	BP	GO:0042116	macrophage activation	7									1	1			0.038	3	1	2							1	2	54
771	BP	GO:0045576	mast cell activation	7																					1	1			54
772	BP	GO:0001773	myeloid dendritic cell activation	7									1	1			1	1											33
773	BP	GO:0002270	plasmacytoid dendritic cell activation	6									1	1			1	1											1
774	BP	GO:0046649	lymphocyte activation	6	1	1			1	1	1	1	1	3	1	2	1	2	1	4	1	2	1	2			1	2	644
775	BP	GO:0001767	establishment of lymphocyte polarity	7															1	1									8
776	BP	GO:0030101	natural killer cell activation	7															1	1			1	1					80
777	BP	GO:0001770	establishment of natural killer cell polarity	8															1	1									1
778	BP	GO:0042113	B cell activation	7							1	1	1	2	1	1	1	1	1	2			1	1			1	1	242
779	BP	GO:0046651	lymphocyte proliferation	7	1	1							1	2			1	2	1	1	1	1	1	1			1	2	264
780	BP	GO:0042100	B cell proliferation	8									1	1			1	1	1	1							1	1	91
781	BP	GO:0001787	natural killer cell proliferation	8																			1	1					9
782	BP	GO:0070489	T cell aggregation	6					1	1			1	2	1	1	1	2	1	3	1	2	1	2			1	2	451
783	BP	GO:0071594	thymocyte aggregation	7									1	1															76
784	BP	GO:0042110	T cell activation	7					1	1			1	2	1	1	1	2	1	3	1	2	1	2			1	2	451
785	BP	GO:0046631	alpha-beta T cell activation	8					1	1			1	1	1	1	1	1	1	1	1	1	1	1			1	1	117
786	BP	GO:0035710	CD4-positive, alpha-beta T cell activation	9									1	1			1	1			1	1					1	1	65
787	BP	GO:0035711	T-helper 1 cell activation	10									1	1			1	1											3
788	BP	GO:0042098	T cell proliferation	8									1	2			1	1			1	1	1	1			1	1	180
789	BP	GO:0033079	immature T cell proliferation	9									1	1															11
790	BP	GO:0050798	activated T cell proliferation	9									1	1			1	1					1	1					46
791	BP	GO:0046633	alpha-beta T cell proliferation	9																	1	1	1	1			1	1	31
792	BP	GO:0035739	CD4-positive, alpha-beta T cell proliferation	10																	1	1					1	1	4
793	BP	GO:0001866	NK T cell proliferation	10																			1	1					6
794	BP	GO:0006928	movement of cell or subcellular component	4	1	4	1	1	1	1	1	4	1	2	1	3	1	5	0.224	9	1	2	1	6	1	3	1	4	1979
795	BP	GO:0030048	actin filament-based movement	5					1	1							1	2	1	2	1	1	1	1			0.198	3	113
796	BP	GO:0070252	actin-mediated cell contraction	6					1	1							1	2	1	1	1	1	1	1			0.115	3	94
797	BP	GO:0033275	actin-myosin filament sliding	7													1	1	1	1							1	1	39
798	BP	GO:0007018	microtubule-based movement	5	1	1					1	1			1	1			1	2			1	1					217
799	BP	GO:0010970	microtubule-based transport	6															1	2									106
800	BP	GO:0008088	axo-dendritic transport	7															1	1									43
801	BP	GO:0008089	anterograde axonal transport	8															1	1									27
802	BP	GO:0072384	organelle transport along microtubule	7															1	1									63
803	BP	GO:0047496	vesicle transport along microtubule	8															1	1									37
804	BP	GO:0048870	cell motility	5	1	3					1	2	1	2	1	2	1	3	1	6	1	2	1	4	1	3	1	2	1320
805	BP	GO:0016477	cell migration	6	1	3					1	2	1	2	1	2	1	3	1	6	1	2	1	4	1	3	1	2	1211
806	BP	GO:0006929	substrate-dependent cell migration	7							1	1																	32
807	BP	GO:0001667	ameboidal-type cell migration	7									1	1			1	2	1	2							1	1	323
808	BP	GO:0010761	fibroblast migration	8													1	1	1	1							1	1	39
809	BP	GO:0050900	leukocyte migration	7									1	1	1	1	1	2	1	2			1	1			1	1	362
810	BP	GO:0097529	myeloid leukocyte migration	8									1	1			1	2	1	1							1	1	160
811	BP	GO:0097530	granulocyte migration	9													1	1	1	1							1	1	113
812	BP	GO:0045123	cellular extravasation	8															1	1									44
813	BP	GO:0050901	leukocyte tethering or rolling	9															1	1									20
814	BP	GO:0071674	mononuclear cell migration	8													1	1	1	1							1	1	16
815	BP	GO:0072676	lymphocyte migration	8																			1	1					75
816	BP	GO:0036336	dendritic cell migration	8									1	1			1	1											27
817	BP	GO:0008219	cell death	4	1	8	1	3	1	1	0.0865	10	0.000801	11	1	8	0.00516	11	0.267	9	0.55	8	1	3	1	5	1	7	2026
818	BP	GO:0070265	necrotic cell death	5									1	1															49
819	BP	GO:0070997	neuron death	5			1	1					1	1			1	1	1	1					1	2	1	2	295
820	BP	GO:0012501	programmed cell death	5	1	8	1	3	1	1	0.326	9	0.0339	9	1	8	0.00309	11	0.179	9	0.384	8	1	3	1	5	1	7	1921
821	BP	GO:0006915	apoptotic process	6	1	8	1	3	1	1	0.301	9	0.0312	9	1	8	0.00279	11	0.165	9	0.358	8	1	3	1	5	1	7	1901
822	BP	GO:0097285	cell-type specific apoptotic process	7	1	2	1	1					1	1			1	3	1	2					1	4	1	3	461
823	BP	GO:0071887	leukocyte apoptotic process	8									1	1											1	1			102
824	BP	GO:0070227	lymphocyte apoptotic process	9																					1	1			71
825	BP	GO:0001783	B cell apoptotic process	10																					1	1			24
826	BP	GO:1904019	epithelial cell apoptotic process	8													1	1	1	1					1	1	1	1	84
827	BP	GO:0072577	endothelial cell apoptotic process	9													1	1	1	1							1	1	47
828	BP	GO:0097284	hepatocyte apoptotic process	9																					1	1			14
829	BP	GO:0006925	inflammatory cell apoptotic process	8									1	1															19
830	BP	GO:0044346	fibroblast apoptotic process	8	0.352	2																							19
831	BP	GO:0010657	muscle cell apoptotic process	8			1	1					1	1			1	1							1	1			52
832	BP	GO:0010658	striated muscle cell apoptotic process	9			1	1									1	1							1	1			28
833	BP	GO:0010659	cardiac muscle cell apoptotic process	10			1	1									1	1							1	1			25
834	BP	GO:0034390	smooth muscle cell apoptotic process	9									1	1															15
835	BP	GO:0033028	myeloid cell apoptotic process	8									1	1															31
836	BP	GO:0071888	macrophage apoptotic process	9									1	1															11
837	BP	GO:0051402	neuron apoptotic process	8													1	1	1	1					1	1	1	2	226
838	BP	GO:1902742	apoptotic process involved in development	7	1	1	1	1													1	1							32
839	BP	GO:0033059	cellular pigmentation	4															1	1									49
840	BP	GO:0051875	pigment granule localization	5															1	1									26
841	BP	GO:0051905	establishment of pigment granule localization	6															1	1									24
842	BP	GO:0032400	melanosome localization	6															1	1									25
843	BP	GO:0032401	establishment of melanosome localization	7															1	1									23
844	BP	GO:0051904	pigment granule transport	6															1	1									23
845	BP	GO:0032402	melanosome transport	7															1	1									22
846	BP	GO:0016049	cell growth	4	1	2			1	1	1	2	1	1	1	1			1	3	1	1			1	2	1	2	497
847	BP	GO:0022402	cell cycle process	4	0.000163	11	1	2	1	1	0.0177	9	0.0167	8	1	4	1	5	1	3	1	2	1	2	1	6	1	5	1319
848	BP	GO:0098813	nuclear chromosome segregation	5	1	2	1	1			0.0069	5	1	3	1	1	1	2							1	1	1	1	216
849	BP	GO:0051310	metaphase plate congression	6	1	1					1	2																	43
850	BP	GO:0044786	cell cycle DNA replication	5	1	2	1	1					1	1															50
851	BP	GO:0033260	nuclear DNA replication	6	1	2							1	1															41
852	BP	GO:0042023	DNA endoreduplication	6			1	1																					9
853	BP	GO:0044770	cell cycle phase transition	5	1	2	1	1	1	1	0.00209	7	1	4	1	1	1	3	1	2			1	2	1	1	1	1	507
854	BP	GO:0044839	cell cycle G2/M phase transition	6	1	1	1	1	1	1	0.119	4	1	2					1	1			1	1	1	1			197
855	BP	GO:0044843	cell cycle G1/S phase transition	6	1	2					1	3	1	2	1	1			1	1			1	1			1	1	259
856	BP	GO:0000075	cell cycle checkpoint	5							0.000527	6	1	3	1	1	1	3									1	1	249
857	BP	GO:0031570	DNA integrity checkpoint	6							1	3	1	1	1	1	1	1									1	1	166
858	BP	GO:0031577	spindle checkpoint	6							0.000691	4	1	2			1	2											54
859	BP	GO:0071173	spindle assembly checkpoint	7							0.000359	4	1	2			1	2											46
860	BP	GO:0051304	chromosome separation	5							0.00339	4	1	2			1	2											80
861	BP	GO:1903047	mitotic cell cycle process	5	0.00531	8	1	2	1	1	0.00657	8	0.119	6	1	3	1	3	1	2	1	1	1	2	1	4	1	1	865
862	BP	GO:0044772	mitotic cell cycle phase transition	6	1	2	1	1	1	1	0.024	6	1	4	1	1	1	2	1	2			1	2	1	1	1	1	483
863	BP	GO:0000082	G1/S transition of mitotic cell cycle	7	1	2					1	2	1	2	1	1			1	1			1	1			1	1	250
864	BP	GO:0000086	G2/M transition of mitotic cell cycle	7	1	1	1	1	1	1	0.11	4	1	2					1	1			1	1	1	1			193
865	BP	GO:0000910	cytokinesis	5							1	1	1	1	1	1									1	1	1	1	175
866	BP	GO:0061640	cytoskeleton-dependent cytokinesis	6							1	1	1	1															40
867	BP	GO:0000281	mitotic cytokinesis	7							1	1	1	1															31
868	BP	GO:0048869	cellular developmental process	4	1	8	0.461	11	0.735	11	1	12	0.0251	13	1	6	1	11	7.4e-05	18	1	7	0.00229	15	1	11	0.127	12	4112
869	BP	GO:0030154	cell differentiation	5	1	8	1	10	1	10	1	12	0.336	11	1	6	1	11	0.000179	17	1	7	0.00103	15	1	10	0.0687	12	3859
870	BP	GO:0048863	stem cell differentiation	6			1	2	1	2	1	2			1	1			1	2					1	1			281
871	BP	GO:0045444	fat cell differentiation	6																			1	2					203
872	BP	GO:0050872	white fat cell differentiation	7																			0.126	2					14
873	BP	GO:0042692	muscle cell differentiation	6	1	1			1	1	1	1							1	1			0.551	4	1	1	1	2	367
874	BP	GO:0045445	myoblast differentiation	7															1	1			0.0972	3					82
875	BP	GO:0051146	striated muscle cell differentiation	7	1	1					1	1											1	1	1	1	1	1	257
876	BP	GO:0030855	epithelial cell differentiation	6			1	1	1	1	1	2			1	1	1	3	1	4			1	4	1	2	1	2	612
877	BP	GO:0002065	columnar/cuboidal epithelial cell differentiation	7			1	1																	1	1			142
878	BP	GO:0009913	epidermal cell differentiation	7							1	1													1	1			189
879	BP	GO:0045446	endothelial cell differentiation	7							1	1			1	1	1	1					1	2			1	1	96
880	BP	GO:0030859	polarized epithelial cell differentiation	7															1	1			1	1					12
881	BP	GO:0045198	establishment of epithelial cell apical/basal polarity	8																			1	1					7
882	BP	GO:0045165	cell fate commitment	5					1	1	1	1							1	1			1	1			1	1	262
883	BP	GO:0043697	cell dedifferentiation	5			1	1	1	1																			2
884	BP	GO:1990828	hepatocyte dedifferentiation	6			1	1	1	1																			1
885	BP	GO:0048468	cell development	5	1	4	1	7	1	6	1	7	1	4	1	2	1	5	0.0165	11	1	2	1	6	1	6	1	4	2225
886	BP	GO:0048864	stem cell development	6			1	1	1	1	1	1																	180
887	BP	GO:0055001	muscle cell development	6	1	1			1	1	1	1											1	1	1	1	1	1	158
888	BP	GO:0055002	striated muscle cell development	7	1	1					1	1											1	1	1	1	1	1	145
889	BP	GO:0048747	muscle fiber development	8																			1	1					60
890	BP	GO:0002064	epithelial cell development	6			1	1			1	1			1	1	1	2	1	2			1	2	1	1	1	2	227
891	BP	GO:0002066	columnar/cuboidal epithelial cell development	7			1	1																	1	1			38
892	BP	GO:0001885	endothelial cell development	7							1	1			1	1	1	1					1	2			1	1	57
893	BP	GO:0061028	establishment of endothelial barrier	8													1	1					0.96	2			1	1	38
894	BP	GO:0048588	developmental cell growth	6															1	1					1	1	1	1	192
895	BP	GO:0048469	cell maturation	5							1	1													1	1			157
896	BP	GO:0010623	developmental programmed cell death	5	1	1	1	1													1	1							42
897	BP	GO:0060561	apoptotic process involved in morphogenesis	6	1	1	1	1													1	1							26
898	BP	GO:0007569	cell aging	4	1	2							1	1															93
899	BP	GO:0090399	replicative senescence	5									1	1															12
900	BP	GO:0097194	execution phase of apoptosis	4	1	1					1	1	0.122	3			0.00441	4	1	2	1	2					1	1	96
901	BP	GO:0006730	one-carbon metabolic process	4	1	1							1	1			1	1	1	1	1	1							35
902	BP	GO:0046950	cellular ketone body metabolic process	4													1	1			1	1							10
903	BP	GO:0046951	ketone body biosynthetic process	5																	1	1							8
904	BP	GO:0046952	ketone body catabolic process	5													1	1			1	1							4
905	BP	GO:0006081	cellular aldehyde metabolic process	4	1	1	1	1													1	1	1	1	1	2			85
906	BP	GO:0019682	glyceraldehyde-3-phosphate metabolic process	5			1	1																	0.491	2			21
907	BP	GO:0015980	energy derivation by oxidation of organic compounds	4	1	2	1	1	1	1	1	2			1	3	0.0796	5	1	1	1	2	1	1	1	1	1	1	402
908	BP	GO:0006113	fermentation	5			1	1																	1	1			5
909	BP	GO:0045333	cellular respiration	5	1	2			1	1	1	1			1	1	1	3	1	1	1	2	1	1			1	1	213
910	BP	GO:0009060	aerobic respiration	6	1	1									1	1	1	2	1	1	1	2	1	1			1	1	64
911	BP	GO:0006112	energy reserve metabolic process	5							1	1			1	2	1	1											183
912	BP	GO:0005977	glycogen metabolic process	6							1	1			1	1													86
913	BP	GO:0005978	glycogen biosynthetic process	7							1	1			1	1													54
914	BP	GO:0005980	glycogen catabolic process	7							1	1																	29
915	BP	GO:0042180	cellular ketone metabolic process	4									1	1			1	3	1	1	1	2	1	3	1	1			272
916	BP	GO:1901661	quinone metabolic process	5																			1	1					30
917	BP	GO:0044598	doxorubicin metabolic process	6																			1	1					9
918	BP	GO:0044597	daunorubicin metabolic process	6																			1	1					9
919	BP	GO:0042182	ketone catabolic process	5													1	1											11
920	BP	GO:0055085	transmembrane transport	4	1	3			1	1			1	2	1	2	1	3	1	5	1	2	1	2	1	1	1	5	1419
921	BP	GO:0090662	ATP hydrolysis coupled transmembrane transport	5	1	1																							36
922	BP	GO:1990542	mitochondrial transmembrane transport	5	1	1																	1	1					60
923	BP	GO:0034220	ion transmembrane transport	5	1	1			1	1					1	1	1	2	1	2					1	1	1	3	1017
924	BP	GO:0098660	inorganic ion transmembrane transport	6	1	1			1	1							1	1	1	1					1	1	1	1	739
925	BP	GO:0098656	anion transmembrane transport	6													1	1	1	1							1	1	233
926	BP	GO:0098655	cation transmembrane transport	6	1	1			1	1					1	1	1	1	1	1					1	1	1	2	723
927	BP	GO:0098662	inorganic cation transmembrane transport	7	1	1			1	1							1	1	1	1					1	1	1	1	657
928	BP	GO:1902600	hydrogen ion transmembrane transport	8	1	1											1	1	1	1									115
929	BP	GO:0015988	energy coupled proton transmembrane transport, against electrochemical gradient	9	1	1																							32
930	BP	GO:0015991	ATP hydrolysis coupled proton transport	10	1	1																							32
931	BP	GO:0015985	energy coupled proton transport, down electrochemical gradient	9	1	1																							27
932	BP	GO:0070588	calcium ion transmembrane transport	8					1	1															1	1	1	1	258
933	BP	GO:1903825	organic acid transmembrane transport	5													1	1	1	1							1	1	95
934	BP	GO:1902001	fatty acid transmembrane transport	6													1	1	1	1							1	1	14
935	BP	GO:0015911	plasma membrane long-chain fatty acid transport	7													1	1	1	1							1	1	5
936	BP	GO:0071806	protein transmembrane transport	5																			1	1			1	1	53
937	BP	GO:0065002	intracellular protein transmembrane transport	6																			1	1					47
938	BP	GO:0044743	intracellular protein transmembrane import	7																			1	1					41
939	BP	GO:0022900	electron transport chain	4	1	1			1	1					1	1	1	1											147
940	BP	GO:0022904	respiratory electron transport chain	5	1	1			1	1					1	1	1	1											145
941	BP	GO:0006082	organic acid metabolic process	4	1	3	1	4	0.125	7			1	4	1	4	1	6	0.0512	8	1.49e-10	15	0.0205	8	0.792	7	1	1	1246
942	BP	GO:0043436	oxoacid metabolic process	5	1	3	1	4	0.115	7			1	4	1	4	1	6	0.0467	8	1.24e-10	15	0.0187	8	0.733	7	1	1	1230
943	BP	GO:0019752	carboxylic acid metabolic process	6	1	3	1	4	0.0589	7			1	4	1	4	1	6	0.0219	8	2.67e-11	15	0.00863	8	0.386	7	1	1	1106
944	BP	GO:0032787	monocarboxylic acid metabolic process	7	1	1	1	1	1	3			1	2	1	1	1	3	1	3	1	4	1	1	1	1			612
945	BP	GO:0006090	pyruvate metabolic process	8	1	1	1	1					1	1	1	1			1	1	1	1			1	1			105
946	BP	GO:0061718	glucose catabolic process to pyruvate	9									1	1	1	1			1	1									27
947	BP	GO:0006086	acetyl-CoA biosynthetic process from pyruvate	9																	1	1							14
948	BP	GO:0006089	lactate metabolic process	8			1	1																	1	1			16
949	BP	GO:0019659	glucose catabolic process to lactate	9			1	1																	1	1			4
950	BP	GO:0046487	glyoxylate metabolic process	8	1	1															1	1							26
951	BP	GO:0008206	bile acid metabolic process	8													1	1					1	1					51
952	BP	GO:0043648	dicarboxylic acid metabolic process	7	0.344	3							1	2	1	1	0.27	3	1	2	1	2	1	2					104
953	BP	GO:0006107	oxaloacetate metabolic process	8									1	1			1	1	1	1	1	1							11
954	BP	GO:0006103	2-oxoglutarate metabolic process	8	1	1							1	1			1	1	1	1	1	1	1	1					20
955	BP	GO:0006106	fumarate metabolic process	8									1	1			1	1	1	1	1	1							3
956	BP	GO:0006105	succinate metabolic process	8											1	1	1	1											10
957	BP	GO:0072350	tricarboxylic acid metabolic process	7	1	1									1	1	1	2	1	1	0.961	2	1	1			1	1	38
958	BP	GO:0006102	isocitrate metabolic process	8																			1	1					5
959	BP	GO:0006101	citrate metabolic process	8	1	1									1	1	0.96	2	1	1	0.768	2	1	1			1	1	34
960	BP	GO:0006099	tricarboxylic acid cycle	9	1	1									1	1	0.746	2	1	1	0.597	2	1	1			1	1	30
961	BP	GO:0006054	N-acetylneuraminate metabolic process	7									1	1															9
962	BP	GO:0006520	cellular amino acid metabolic process	7	1	3	1	3	1	4			1	2	1	2	1	2	0.286	5	3.2e-11	12	0.0107	6	0.0429	6			518
963	BP	GO:1901605	alpha-amino acid metabolic process	8	1	3	1	3	0.384	4			1	2	1	2	1	2	0.0458	5	1.66e-11	11	0.00114	6	0.00471	6			351
964	BP	GO:0009066	aspartate family amino acid metabolic process	9	1	1							1	1	1	1	1	1	1	1	1	1			1	1			49
965	BP	GO:0006553	lysine metabolic process	10	1	1																							13
966	BP	GO:0006531	aspartate metabolic process	10									1	1			1	1	1	1	1	1							11
967	BP	GO:0009064	glutamine family amino acid metabolic process	9	1	1	1	1					1	1			1	1	1	1	1	1	1	1					72
968	BP	GO:0006525	arginine metabolic process	10	1	1	1	1																					20
969	BP	GO:0006536	glutamate metabolic process	10	1	1							1	1			1	1	1	1	1	1	1	1					32
970	BP	GO:0006560	proline metabolic process	10	1	1																	1	1					11
971	BP	GO:1902221	erythrose 4-phosphate/phosphoenolpyruvate family amino acid metabolic process	9			0.0718	2																					12
972	BP	GO:0006591	ornithine metabolic process	9																			1	1					8
973	BP	GO:0009069	serine family amino acid metabolic process	9	1	1	1	1	0.00729	4			1	1	1	1	1	1	0.0143	4	3.35e-12	9	0.00891	4	0.0236	4			127
974	BP	GO:0009092	homoserine metabolic process	10			1	1																	1	1			5
975	BP	GO:0006544	glycine metabolic process	10	1	1							1	1			1	1	1	1	1	1							16
976	BP	GO:0006563	L-serine metabolic process	10	1	1							1	1			1	1	1	1	1	1			1	1			9
977	BP	GO:0016259	selenocysteine metabolic process	10					0.00184	4					1	1			0.18	3	2.11e-11	8	0.00226	4	0.271	3			90
978	BP	GO:0000052	citrulline metabolic process	9																			1	1					13
979	BP	GO:0019471	4-hydroxyproline metabolic process	9									1	1			1	1	1	1	1	1							13
980	BP	GO:0070189	kynurenine metabolic process	9									1	1			1	1	1	1	1	1	1	1					10
981	BP	GO:0097052	L-kynurenine metabolic process	10									1	1			1	1	1	1	1	1	1	1					5
982	BP	GO:0006760	folic acid-containing compound metabolic process	9	1	1							1	1			1	1	1	1	1	1							27
983	BP	GO:0046653	tetrahydrofolate metabolic process	10	1	1							1	1			1	1	1	1	1	1							19
984	BP	GO:0035999	tetrahydrofolate interconversion	11	1	1							1	1			1	1	1	1	1	1							10
985	BP	GO:0046655	folic acid metabolic process	10	1	1							1	1			1	1	1	1	1	1							13
986	BP	GO:0009081	branched-chain amino acid metabolic process	8																	0.482	2							27
987	BP	GO:0006551	leucine metabolic process	9																	1	1							6
988	BP	GO:0000096	sulfur amino acid metabolic process	8			1	1							1	1									0.0339	3			45
989	BP	GO:0006534	cysteine metabolic process	9			1	1																	1	1			10
990	BP	GO:0046439	L-cysteine metabolic process	10																					1	1			4
991	BP	GO:0006555	methionine metabolic process	9											1	1									1	1			16
992	BP	GO:0050667	homocysteine metabolic process	9			1	1																	0.214	2			14
993	BP	GO:0019346	transsulfuration	10			1	1																	1	1			5
994	BP	GO:0009072	aromatic amino acid family metabolic process	8			0.469	2															1	1					30
995	BP	GO:0006570	tyrosine metabolic process	9			0.049	2																					10
996	BP	GO:0006558	L-phenylalanine metabolic process	9			0.0718	2																					12
997	BP	GO:0006568	tryptophan metabolic process	9																			1	1					13
998	BP	GO:0009439	cyanate metabolic process	5			1	1																					2
999	BP	GO:0009440	cyanate catabolic process	6			1	1																					2
1000	BP	GO:0016053	organic acid biosynthetic process	5	1	2							1	2	1	1	0.436	4	1	2	1	2	1	1	1	2			311
1001	BP	GO:0046394	carboxylic acid biosynthetic process	6	1	2							1	2	1	1	0.436	4	1	2	1	2	1	1	1	2			311
1002	BP	GO:0072330	monocarboxylic acid biosynthetic process	7													1	2											218
1003	BP	GO:0006699	bile acid biosynthetic process	8													1	1											29
1004	BP	GO:0043650	dicarboxylic acid biosynthetic process	7									1	1			1	1	1	1	1	1							14
1005	BP	GO:0008652	cellular amino acid biosynthetic process	7	1	2							1	2	1	1	1	2	1	2	1	2	1	1	1	2			91
1006	BP	GO:1901607	alpha-amino acid biosynthetic process	8	1	2							1	2	1	1	1	2	1	2	1	2	1	1	1	2			76
1007	BP	GO:0009084	glutamine family amino acid biosynthetic process	9	1	1																	1	1					22
1008	BP	GO:0006561	proline biosynthetic process	10	1	1																	1	1					8
1009	BP	GO:0055129	L-proline biosynthetic process	11	1	1																	1	1					5
1010	BP	GO:0009067	aspartate family amino acid biosynthetic process	9									1	1	1	1	1	1	1	1	1	1			1	1			19
1011	BP	GO:0006532	aspartate biosynthetic process	10									1	1			1	1	1	1	1	1							3
1012	BP	GO:0009070	serine family amino acid biosynthetic process	9	1	1							1	1			1	1	1	1	1	1			1	1			16
1013	BP	GO:0006545	glycine biosynthetic process	10	1	1							1	1			1	1	1	1	1	1							6
1014	BP	GO:0019264	glycine biosynthetic process from serine	11	1	1							1	1			1	1	1	1	1	1							2
1015	BP	GO:0006564	L-serine biosynthetic process	10	1	1							1	1			1	1	1	1	1	1							4
1016	BP	GO:0006592	ornithine biosynthetic process	9																			1	1					1
1017	BP	GO:0019240	citrulline biosynthetic process	9																			1	1					9
1018	BP	GO:0043102	amino acid salvage	8											1	1									1	1			8
1019	BP	GO:0000097	sulfur amino acid biosynthetic process	8											1	1									0.4	2			19
1020	BP	GO:0019344	cysteine biosynthetic process	9																					1	1			4
1021	BP	GO:0019343	cysteine biosynthetic process via cystathionine	10																					1	1			3
1022	BP	GO:0006535	cysteine biosynthetic process from serine	10																					1	1			2
1023	BP	GO:0009086	methionine biosynthetic process	9											1	1									1	1			13
1024	BP	GO:0071265	L-methionine biosynthetic process	10											1	1									1	1			8
1025	BP	GO:0071267	L-methionine salvage	11											1	1									1	1			8
1026	BP	GO:0019509	L-methionine biosynthetic process from methylthioadenosine	12											1	1									1	1			6
1027	BP	GO:0016054	organic acid catabolic process	5	1	2	1	2	1	2			1	1			1	3	1	1	1	3	1	1	1	1			231
1028	BP	GO:0046395	carboxylic acid catabolic process	6	1	2	1	2	1	2			1	1			1	3	1	1	1	3	1	1	1	1			231
1029	BP	GO:0072329	monocarboxylic acid catabolic process	7					1	2			1	1			0.327	3	1	1	1	2							111
1030	BP	GO:0043649	dicarboxylic acid catabolic process	7									1	1			1	1	1	1	1	1							16
1031	BP	GO:0009063	cellular amino acid catabolic process	7	1	2	1	2					1	1			1	1	1	1	0.318	3	1	1	1	1			123
1032	BP	GO:1901606	alpha-amino acid catabolic process	8	1	2	1	2					1	1			1	1	1	1	1	2	1	1	1	1			99
1033	BP	GO:1902222	erythrose 4-phosphate/phosphoenolpyruvate family amino acid catabolic process	9			0.0599	2																					11
1034	BP	GO:0009065	glutamine family amino acid catabolic process	9	1	1	1	1					1	1			1	1	1	1	1	1							25
1035	BP	GO:0006527	arginine catabolic process	10	1	1	1	1																					10
1036	BP	GO:0019493	arginine catabolic process to proline	11	1	1																							1
1037	BP	GO:0010121	arginine catabolic process to proline via ornithine	12	1	1																							1
1038	BP	GO:0019544	arginine catabolic process to glutamate	11	1	1																							1
1039	BP	GO:0006538	glutamate catabolic process	10									1	1			1	1	1	1	1	1							7
1040	BP	GO:0019550	glutamate catabolic process to aspartate	11									1	1			1	1	1	1	1	1							2
1041	BP	GO:0019551	glutamate catabolic process to 2-oxoglutarate	11									1	1			1	1	1	1	1	1							2
1042	BP	GO:0009068	aspartate family amino acid catabolic process	9	1	1							1	1			1	1	1	1	1	1							18
1043	BP	GO:0006554	lysine catabolic process	10	1	1																							12
1044	BP	GO:0006533	aspartate catabolic process	10									1	1			1	1	1	1	1	1							4
1045	BP	GO:0009071	serine family amino acid catabolic process	9																					1	1			11
1046	BP	GO:0006565	L-serine catabolic process	10																					1	1			4
1047	BP	GO:0019470	4-hydroxyproline catabolic process	9									1	1			1	1	1	1	1	1							4
1048	BP	GO:0009083	branched-chain amino acid catabolic process	8																	0.38	2							24
1049	BP	GO:0006552	leucine catabolic process	9																	1	1							5
1050	BP	GO:0000098	sulfur amino acid catabolic process	8																					1	1			14
1051	BP	GO:0009093	cysteine catabolic process	9																					1	1			4
1052	BP	GO:0019448	L-cysteine catabolic process	10																					1	1			4
1053	BP	GO:0043418	homocysteine catabolic process	9																					1	1			3
1054	BP	GO:0009074	aromatic amino acid family catabolic process	8			0.228	2															1	1					21
1055	BP	GO:0006572	tyrosine catabolic process	9			0.0109	2																					5
1056	BP	GO:0006559	L-phenylalanine catabolic process	9			0.0599	2																					11
1057	BP	GO:0006569	tryptophan catabolic process	9																			1	1					11
1058	BP	GO:0044255	cellular lipid metabolic process	4	1	1			1	4	1	2	1	3	1	2	1	3	1	2	1	5	1	3	1	1			1066
1059	BP	GO:0046486	glycerolipid metabolic process	5					1	1	1	2							1	2			1	1	1	1			394
1060	BP	GO:0045017	glycerolipid biosynthetic process	6					1	1	1	1							1	2									278
1061	BP	GO:0006638	neutral lipid metabolic process	5					1	1	1	2							1	2			1	1	1	1			163
1062	BP	GO:0046460	neutral lipid biosynthetic process	6					1	1	1	1							1	2									88
1063	BP	GO:0006639	acylglycerol metabolic process	6					1	1	1	2							1	2			1	1	1	1			162
1064	BP	GO:0046463	acylglycerol biosynthetic process	7					1	1	1	1							1	2									88
1065	BP	GO:0006641	triglyceride metabolic process	7					1	1	1	2							1	2			1	1	1	1			153
1066	BP	GO:0019432	triglyceride biosynthetic process	8					1	1	1	1							1	2									86
1067	BP	GO:0030258	lipid modification	5					1	2							1	2			1	1							195
1068	BP	GO:0034440	lipid oxidation	6					1	2							1	2			1	1							98
1069	BP	GO:0006720	isoprenoid metabolic process	5																			1	1					131
1070	BP	GO:0006721	terpenoid metabolic process	6																			1	1					110
1071	BP	GO:0016101	diterpenoid metabolic process	7																			1	1					99
1072	BP	GO:0001523	retinoid metabolic process	8																			1	1					92
1073	BP	GO:0042574	retinal metabolic process	9																			1	1					13
1074	BP	GO:0006643	membrane lipid metabolic process	5	1	1															1	1							195
1075	BP	GO:0046467	membrane lipid biosynthetic process	6	1	1															1	1							126
1076	BP	GO:0006665	sphingolipid metabolic process	6	1	1															1	1							147
1077	BP	GO:0006672	ceramide metabolic process	7	1	1															1	1							83
1078	BP	GO:0030148	sphingolipid biosynthetic process	7	1	1															1	1							88
1079	BP	GO:0046513	ceramide biosynthetic process	8	1	1															1	1							52
1080	BP	GO:0006644	phospholipid metabolic process	5																					1	1			382
1081	BP	GO:0006650	glycerophospholipid metabolic process	6																					1	1			273
1082	BP	GO:0046470	phosphatidylcholine metabolic process	7																					1	1			69
1083	BP	GO:0036151	phosphatidylcholine acyl-chain remodeling	8																					1	1			27
1084	BP	GO:0044242	cellular lipid catabolic process	5					0.964	3	1	1	1	1			1	2			1	1							187
1085	BP	GO:0046503	glycerolipid catabolic process	6							1	1																	53
1086	BP	GO:0046461	neutral lipid catabolic process	6							1	1																	41
1087	BP	GO:0046464	acylglycerol catabolic process	7							1	1																	41
1088	BP	GO:0019433	triglyceride catabolic process	8							1	1																	37
1089	BP	GO:0006490	oligosaccharide-lipid intermediate biosynthetic process	5									1	1															74
1090	BP	GO:0006488	dolichol-linked oligosaccharide biosynthetic process	6									1	1															74
1091	BP	GO:0006631	fatty acid metabolic process	5					1	3							1	2	1	1	1	3							375
1092	BP	GO:0097089	methyl-branched fatty acid metabolic process	6													1	1											2
1093	BP	GO:0001676	long-chain fatty acid metabolic process	6					1	1							1	1	1	1									105
1094	BP	GO:0000038	very long-chain fatty acid metabolic process	6													0.746	2											30
1095	BP	GO:0019395	fatty acid oxidation	6					1	2							1	2			1	1							96
1096	BP	GO:0006633	fatty acid biosynthetic process	6													1	1											153
1097	BP	GO:0009062	fatty acid catabolic process	6					1	2							1	2			1	1							88
1098	BP	GO:0042760	very long-chain fatty acid catabolic process	7													0.0261	2											6
1099	BP	GO:0001561	fatty acid alpha-oxidation	7													1	1											6
1100	BP	GO:0006635	fatty acid beta-oxidation	7					1	2							1	2			1	1							70
1101	BP	GO:0033539	fatty acid beta-oxidation using acyl-CoA dehydrogenase	8					1	1							1	1			1	1							19
1102	BP	GO:0032940	secretion by cell	4	1	1			1	3	1	1	1	5	1	1	1	4	0.0779	7			1	1	1	2	1	1	963
1103	BP	GO:0023061	signal release	5	1	1			1	1			1	1			1	1	1	1					1	1			450
1104	BP	GO:0006887	exocytosis	5					1	3	1	1	1	3	1	1	1	2	0.0596	5			1	1	1	2	1	1	371
1105	BP	GO:0045055	regulated exocytosis	6					1	1					1	1	1	1	1	1					1	1			172
1106	BP	GO:0017156	calcium ion regulated exocytosis	7					1	1																			102
1107	BP	GO:0043299	leukocyte degranulation	7																					1	1			62
1108	BP	GO:1990182	exosomal secretion	6					1	1			1	1															17
1109	BP	GO:0002576	platelet degranulation	6									1	1			1	1	1	1							1	1	87
1110	BP	GO:0006904	vesicle docking involved in exocytosis	6							1	1	1	1					1	2			1	1					36
1111	BP	GO:0009306	protein secretion	5	1	1					1	1	1	2			1	2	1	4					1	1			495
1112	BP	GO:0071804	cellular potassium ion transport	4																							1	1	180
1113	BP	GO:0071805	potassium ion transmembrane transport	5																							1	1	180
1114	BP	GO:0006903	vesicle targeting	4									1	1					1	2									87
1115	BP	GO:0048199	vesicle targeting, to, from or within Golgi	5									1	1					1	2									74
1116	BP	GO:0048207	vesicle targeting, rough ER to cis-Golgi	6									1	1					1	2									60
1117	BP	GO:0055086	nucleobase-containing small molecule metabolic process	4	1	2	1	2	1	1	1	1	1	1	1	3	1	2	1	3	1	1	1	4	1	3	1	2	715
1118	BP	GO:0009112	nucleobase metabolic process	5					1	1													1	1					71
1119	BP	GO:0046112	nucleobase biosynthetic process	6					1	1													1	1					16
1120	BP	GO:0006144	purine nucleobase metabolic process	6					1	1													1	1					42
1121	BP	GO:0046083	adenine metabolic process	7					1	1													1	1					3
1122	BP	GO:0009113	purine nucleobase biosynthetic process	7					1	1													1	1					10
1123	BP	GO:0043096	purine nucleobase salvage	8					1	1													1	1					4
1124	BP	GO:0046084	adenine biosynthetic process	8					1	1													1	1					3
1125	BP	GO:0006168	adenine salvage	9					1	1													1	1					2
1126	BP	GO:0006753	nucleoside phosphate metabolic process	5	1	2	1	1	1	1	1	1	1	1	1	3	1	2	1	3	1	1	1	3	1	3	1	2	655
1127	BP	GO:0009123	nucleoside monophosphate metabolic process	6	1	2	1	1	1	1			1	1	1	1			1	1			1	2	1	1			286
1128	BP	GO:0009161	ribonucleoside monophosphate metabolic process	7	1	2	1	1	1	1			1	1	1	1			1	1			1	1	1	1			274
1129	BP	GO:0009126	purine nucleoside monophosphate metabolic process	7	1	2	1	1	1	1			1	1	1	1			1	1			1	1	1	1			263
1130	BP	GO:0009167	purine ribonucleoside monophosphate metabolic process	8	1	2	1	1	1	1			1	1	1	1			1	1			1	1	1	1			262
1131	BP	GO:0009141	nucleoside triphosphate metabolic process	6	1	2	1	1					1	1	1	1			1	1			1	1	1	1			268
1132	BP	GO:0009199	ribonucleoside triphosphate metabolic process	7	1	2	1	1					1	1	1	1			1	1					1	1			247
1133	BP	GO:0009144	purine nucleoside triphosphate metabolic process	7	1	2	1	1					1	1	1	1			1	1					1	1			248
1134	BP	GO:0009205	purine ribonucleoside triphosphate metabolic process	8	1	2	1	1					1	1	1	1			1	1					1	1			241
1135	BP	GO:0009147	pyrimidine nucleoside triphosphate metabolic process	7																			1	1					23
1136	BP	GO:0009200	deoxyribonucleoside triphosphate metabolic process	7																			1	1					17
1137	BP	GO:0009211	pyrimidine deoxyribonucleoside triphosphate metabolic process	8																			1	1					5
1138	BP	GO:1901293	nucleoside phosphate biosynthetic process	6	1	1			1	1					1	1							1	2	1	1	1	1	318
1139	BP	GO:0009124	nucleoside monophosphate biosynthetic process	7	1	1			1	1													1	1					91
1140	BP	GO:0009127	purine nucleoside monophosphate biosynthetic process	8	1	1			1	1													1	1					71
1141	BP	GO:0009156	ribonucleoside monophosphate biosynthetic process	8	1	1			1	1													1	1					83
1142	BP	GO:0009168	purine ribonucleoside monophosphate biosynthetic process	9	1	1			1	1													1	1					71
1143	BP	GO:0009142	nucleoside triphosphate biosynthetic process	7	1	1																	1	1					74
1144	BP	GO:0009201	ribonucleoside triphosphate biosynthetic process	8	1	1																							62
1145	BP	GO:0009202	deoxyribonucleoside triphosphate biosynthetic process	8																			1	1					6
1146	BP	GO:0009148	pyrimidine nucleoside triphosphate biosynthetic process	8																			1	1					21
1147	BP	GO:0009212	pyrimidine deoxyribonucleoside triphosphate biosynthetic process	9																			1	1					4
1148	BP	GO:0009145	purine nucleoside triphosphate biosynthetic process	8	1	1																							57
1149	BP	GO:0009206	purine ribonucleoside triphosphate biosynthetic process	9	1	1																							56
1150	BP	GO:1901292	nucleoside phosphate catabolic process	6			1	1			1	1													1	1			106
1151	BP	GO:0009117	nucleotide metabolic process	6	1	2	1	1	1	1	1	1	1	1	1	3	1	2	1	3	1	1	1	3	1	3	1	2	648
1152	BP	GO:0019362	pyridine nucleotide metabolic process	7	1	1	1	1					1	1	0.742	3	1	1	1	2	1	1			0.782	3			129
1153	BP	GO:0046497	nicotinate nucleotide metabolic process	8																					1	1			1
1154	BP	GO:0046496	nicotinamide nucleotide metabolic process	8	1	1	1	1					1	1	0.742	3	1	1	1	2	1	1			0.782	3			129
1155	BP	GO:0006739	NADP metabolic process	9			1	1							1	2	1	1	1	1					1	2			36
1156	BP	GO:0006740	NADPH regeneration	10													1	1	1	1					1	1			3
1157	BP	GO:0006098	pentose-phosphate shunt	10			1	1																	0.358	2			18
1158	BP	GO:0009051	pentose-phosphate shunt, oxidative branch	10																					1	1			3
1159	BP	GO:0019674	NAD metabolic process	9	1	1	1	1					1	1	1	2			1	1					1	2			62
1160	BP	GO:0006734	NADH metabolic process	10	1	1	1	1					1	1	1	1			1	1					1	1			40
1161	BP	GO:0006735	NADH regeneration	11									1	1	1	1			1	1									27
1162	BP	GO:0061732	mitochondrial acetyl-CoA biosynthetic process from pyruvate	9																	1	1							5
1163	BP	GO:0009187	cyclic nucleotide metabolic process	7													1	1	1	1			1	1			1	1	196
1164	BP	GO:0009262	deoxyribonucleotide metabolic process	7							1	1											1	1					35
1165	BP	GO:0009394	2'-deoxyribonucleotide metabolic process	8							1	1											1	1					30
1166	BP	GO:0046939	nucleotide phosphorylation	7	1	1	1	1					1	1	1	1			1	1			1	1	1	1			95
1167	BP	GO:0006163	purine nucleotide metabolic process	7	1	2	1	1	1	1	1	1	1	1	1	1	1	1	1	2			1	2	1	1	1	1	526
1168	BP	GO:0009151	purine deoxyribonucleotide metabolic process	8							1	1																	15
1169	BP	GO:0009259	ribonucleotide metabolic process	7	1	2	1	1	1	1			1	1	1	1	1	1	1	2			1	2	1	1	1	1	520
1170	BP	GO:0009150	purine ribonucleotide metabolic process	8	1	2	1	1	1	1			1	1	1	1	1	1	1	2			1	2	1	1	1	1	505
1171	BP	GO:0046058	cAMP metabolic process	9																			1	1					152
1172	BP	GO:0046068	cGMP metabolic process	9													1	1	1	1							1	1	47
1173	BP	GO:0006220	pyrimidine nucleotide metabolic process	7																			1	1			1	1	47
1174	BP	GO:0009219	pyrimidine deoxyribonucleotide metabolic process	8																			1	1					16
1175	BP	GO:0046075	dTTP metabolic process	9																			1	1					4
1176	BP	GO:0009166	nucleotide catabolic process	7			1	1			1	1													1	1			99
1177	BP	GO:0009264	deoxyribonucleotide catabolic process	8							1	1																	20
1178	BP	GO:0006195	purine nucleotide catabolic process	8			1	1			1	1													1	1			49
1179	BP	GO:0009155	purine deoxyribonucleotide catabolic process	9							1	1																	9
1180	BP	GO:0009165	nucleotide biosynthetic process	7	1	1			1	1					1	1							1	2	1	1	1	1	313
1181	BP	GO:0043173	nucleotide salvage	8					1	1													1	1	1	1			13
1182	BP	GO:0009260	ribonucleotide biosynthetic process	8	1	1			1	1													1	1					264
1183	BP	GO:0046940	nucleoside monophosphate phosphorylation	8																			1	1					2
1184	BP	GO:0009263	deoxyribonucleotide biosynthetic process	8																			1	1					12
1185	BP	GO:0009265	2'-deoxyribonucleotide biosynthetic process	9																			1	1					9
1186	BP	GO:0006164	purine nucleotide biosynthetic process	8	1	1			1	1													1	1					257
1187	BP	GO:0032261	purine nucleotide salvage	9					1	1													1	1					7
1188	BP	GO:0009152	purine ribonucleotide biosynthetic process	9	1	1			1	1													1	1					251
1189	BP	GO:0006221	pyrimidine nucleotide biosynthetic process	8																			1	1			1	1	32
1190	BP	GO:0009221	pyrimidine deoxyribonucleotide biosynthetic process	9																			1	1					6
1191	BP	GO:0006235	dTTP biosynthetic process	10																			1	1					4
1192	BP	GO:0019363	pyridine nucleotide biosynthetic process	8											1	1									1	1			19
1193	BP	GO:0019359	nicotinamide nucleotide biosynthetic process	9											1	1									1	1			19
1194	BP	GO:0006741	NADP biosynthetic process	10											1	1													3
1195	BP	GO:0009435	NAD biosynthetic process	10																					1	1			16
1196	BP	GO:0019365	pyridine nucleotide salvage	9																					1	1			1
1197	BP	GO:0019357	nicotinate nucleotide biosynthetic process	9																					1	1			1
1198	BP	GO:0019358	nicotinate nucleotide salvage	10																					1	1			1
1199	BP	GO:0009132	nucleoside diphosphate metabolic process	6	1	1	1	1					1	1	1	1			1	1			1	1	1	1			117
1200	BP	GO:0009185	ribonucleoside diphosphate metabolic process	7	1	1	1	1					1	1	1	1			1	1					1	1			96
1201	BP	GO:0009135	purine nucleoside diphosphate metabolic process	7	1	1	1	1					1	1	1	1			1	1					1	1			94
1202	BP	GO:0009179	purine ribonucleoside diphosphate metabolic process	8	1	1	1	1					1	1	1	1			1	1					1	1			94
1203	BP	GO:0009138	pyrimidine nucleoside diphosphate metabolic process	7																			1	1					3
1204	BP	GO:0009186	deoxyribonucleoside diphosphate metabolic process	7																			1	1					8
1205	BP	GO:0009196	pyrimidine deoxyribonucleoside diphosphate metabolic process	8																			1	1					2
1206	BP	GO:0046077	dUDP metabolic process	9																			1	1					2
1207	BP	GO:0046072	dTDP metabolic process	9																			1	1					2
1208	BP	GO:0006165	nucleoside diphosphate phosphorylation	7	1	1	1	1					1	1	1	1			1	1					1	1			89
1209	BP	GO:0009133	nucleoside diphosphate biosynthetic process	7																			1	1					9
1210	BP	GO:0009139	pyrimidine nucleoside diphosphate biosynthetic process	8																			1	1					2
1211	BP	GO:0009189	deoxyribonucleoside diphosphate biosynthetic process	8																			1	1					4
1212	BP	GO:0009197	pyrimidine deoxyribonucleoside diphosphate biosynthetic process	9																			1	1					2
1213	BP	GO:0006233	dTDP biosynthetic process	10																			1	1					2
1214	BP	GO:0006227	dUDP biosynthetic process	10																			1	1					2
1215	BP	GO:0015949	nucleobase-containing small molecule interconversion	5																			1	1					26
1216	BP	GO:0009116	nucleoside metabolic process	5	1	2	1	2	1	1			1	1	1	1			1	1			1	2	1	1	1	1	390
1217	BP	GO:0009119	ribonucleoside metabolic process	6	1	2	1	1	1	1			1	1	1	1			1	1			1	1	1	1			366
1218	BP	GO:0009163	nucleoside biosynthetic process	6	1	1			1	1													1	1					128
1219	BP	GO:0043174	nucleoside salvage	7					1	1													1	1					16
1220	BP	GO:0042455	ribonucleoside biosynthetic process	7	1	1			1	1													1	1					118
1221	BP	GO:0042278	purine nucleoside metabolic process	6	1	2	1	2	1	1			1	1	1	1			1	1			1	2	1	1			340
1222	BP	GO:0046128	purine ribonucleoside metabolic process	7	1	2	1	1	1	1			1	1	1	1			1	1			1	1	1	1			337
1223	BP	GO:0046033	AMP metabolic process	8					1	1													1	1					15
1224	BP	GO:0046034	ATP metabolic process	8	1	2	1	1					1	1	1	1			1	1					1	1			225
1225	BP	GO:0046031	ADP metabolic process	8	1	1	1	1					1	1	1	1			1	1					1	1			79
1226	BP	GO:0019660	glycolytic fermentation	9			1	1																	1	1			4
1227	BP	GO:0019661	glucose catabolic process to lactate via pyruvate	10			1	1																	1	1			4
1228	BP	GO:0006757	ATP generation from ADP	9	1	1	1	1					1	1	1	1			1	1					1	1			71
1229	BP	GO:0006096	glycolytic process	10	1	1	1	1					1	1	1	1			1	1					1	1			70
1230	BP	GO:0061615	glycolytic process through fructose-6-phosphate	11									1	1	1	1			1	1									27
1231	BP	GO:0061620	glycolytic process through glucose-6-phosphate	12									1	1	1	1			1	1									27
1232	BP	GO:0061621	canonical glycolysis	13									1	1	1	1			1	1									27
1233	BP	GO:0042451	purine nucleoside biosynthetic process	7	1	1			1	1													1	1					99
1234	BP	GO:0046129	purine ribonucleoside biosynthetic process	8	1	1			1	1													1	1					99
1235	BP	GO:0006166	purine ribonucleoside salvage	9					1	1													1	1					4
1236	BP	GO:0006167	AMP biosynthetic process	9					1	1													1	1					7
1237	BP	GO:0044209	AMP salvage	10					1	1													1	1					2
1238	BP	GO:0006754	ATP biosynthetic process	9	1	1																							45
1239	BP	GO:0015986	ATP synthesis coupled proton transport	10	1	1																							27
1240	BP	GO:0042776	mitochondrial ATP synthesis coupled proton transport	11	1	1																							19
1241	BP	GO:0006213	pyrimidine nucleoside metabolic process	6																							1	1	53
1242	BP	GO:0006482	protein demethylation	4			1	1									1	1	1	1			1	1			1	1	42
1243	BP	GO:0006769	nicotinamide metabolic process	4																					1	1			4
1244	BP	GO:0031623	receptor internalization	4									1	1	1	1	1	1	1	1					1	1			82
1245	BP	GO:0017183	peptidyl-diphthamide biosynthetic process from peptidyl-histidine	4																					1	1			8
1246	BP	GO:0006486	protein glycosylation	4									1	2			1	2	1	3	1	1			1	1	1	2	424
1247	BP	GO:0006487	protein N-linked glycosylation	5									1	2			1	1	1	2	1	1			1	1	1	1	260
1248	BP	GO:0018279	protein N-linked glycosylation via asparagine	6									1	2			1	1	1	2	1	1			1	1	1	1	248
1249	BP	GO:0006493	protein O-linked glycosylation	5													1	1	1	1							1	1	101
1250	BP	GO:0036066	protein O-linked fucosylation	6													1	1	1	1							1	1	12
1251	BP	GO:0050896	response to stimulus	2	0.00242	24	0.000154	22	0.509	17	1.75e-06	29	7.92e-06	24	0.0142	23	2.23e-05	26	7.91e-09	31	0.00448	21	7.95e-11	31	0.0024	25	7.92e-06	24	8574
1252	BP	GO:0009719	response to endogenous stimulus	3	1	2	1	4	1	4	1	5	1	1	1	6	0.447	8	1	7	1	6	0.00396	10	1	4	1	6	1747
1253	BP	GO:0071495	cellular response to endogenous stimulus	4	1	2	1	3	1	3	1	4			1	6	1	5	1	6	1	3	0.00316	9	1	4	1	4	1312
1254	BP	GO:0042221	response to chemical	3	0.859	13	0.207	12	0.345	12	0.0734	15	0.0573	13	1	11	0.0217	15	0.00132	17	0.00479	15	0.000179	17	1	11	0.0111	14	4445
1255	BP	GO:1990267	response to transition metal nanoparticle	4							1	1	1	1					1	1	1	1	1	1	1	1	1	1	156
1256	BP	GO:1901698	response to nitrogen compound	4	1	1	1	3	1	4	1	5			1	5	1	6	0.0193	8	1	2	1	3	1	1	1	5	1087
1257	BP	GO:0060359	response to ammonium ion	5			1	1	1	1							1	1	1	1							1	1	97
1258	BP	GO:1901700	response to oxygen-containing compound	4	1	3	1	5	1	6	1	6	1	4	1	5	0.00628	10	0.0583	9	1	6	0.0211	9	1	4	0.0863	8	1660
1259	BP	GO:0001101	response to acid chemical	4			1	1	1	1	1	1	1	1			1	1	1	1	1	2	1	3	1	2	1	1	332
1260	BP	GO:0009410	response to xenobiotic stimulus	4			1	1			1	1											1	1	1	2	1	1	202
1261	BP	GO:0010035	response to inorganic substance	4	1	1	0.0961	5	1	3	1	3	1	1			1	3	1	3	1	2	1	3	1	4	1	3	519
1262	BP	GO:0010038	response to metal ion	5	1	1	0.0144	5	1	3	1	2	1	1			1	1	1	2	1	2	1	2	1	2	1	2	349
1263	BP	GO:0046686	response to cadmium ion	6							1	1											1	1					45
1264	BP	GO:0032026	response to magnesium ion	6													1	1	1	1							1	1	22
1265	BP	GO:0010044	response to aluminum ion	6			1	1																					6
1266	BP	GO:0051592	response to calcium ion	6	1	1	1	2	1	2							1	1	1	1							1	1	120
1267	BP	GO:0035864	response to potassium ion	6																	1	1							14
1268	BP	GO:0032025	response to cobalt ion	6			0.0718	2	1	1															1	1			12
1269	BP	GO:0046688	response to copper ion	6									1	1					1	1	1	1	1	1	1	1	1	1	32
1270	BP	GO:0010042	response to manganese ion	6									1	1					1	1	1	1	1	1			1	1	18
1271	BP	GO:0010039	response to iron ion	6							1	1	1	1					1	1	1	1	1	1			1	1	36
1272	BP	GO:0010041	response to iron(III) ion	7							1	1																	3
1273	BP	GO:0072714	response to selenite ion	5																			1	1					2
1274	BP	GO:0042493	response to drug	4	1	1					1	2	1	3	1	1	1	4	0.147	5	1	2	1	2	1	1	1	3	449
1275	BP	GO:0046685	response to arsenic-containing substance	4	1	1													1	1									28
1276	BP	GO:0010033	response to organic substance	4	0.393	11	0.833	9	0.0456	11	0.0212	13	0.202	10	0.499	11	0.00693	13	0.000251	15	0.00178	13	0.000312	14	1	7	0.0356	11	3009
1277	BP	GO:1901654	response to ketone	5	1	1	1	1	1	1							1	3	1	1			1	1			1	1	175
1278	BP	GO:1904587	response to glycoprotein	5			1	1	1	1																			5
1279	BP	GO:0033993	response to lipid	5	1	2	1	4	1	5	1	4	1	3	1	1	1	4	1	3	1	4	0.197	6	1	3	0.125	6	873
1280	BP	GO:0032526	response to retinoic acid	6									1	1					1	1	1	1	1	1			1	1	114
1281	BP	GO:0070542	response to fatty acid	6							1	1					1	1			1	1							84
1282	BP	GO:0061724	lipophagy	6					1	1			1	1															4
1283	BP	GO:0070848	response to growth factor	5	1	2	1	3	1	2	1	2			1	2	1	2	1	3	1	2	1	5	1	2	1	2	952
1284	BP	GO:0071772	response to BMP	6	1	1															1	1							156
1285	BP	GO:1990089	response to nerve growth factor	6													1	1					1	1	1	1	1	1	40
1286	BP	GO:0071774	response to fibroblast growth factor	6											1	1	1	2	1	2							1	1	347
1287	BP	GO:0071559	response to transforming growth factor beta	6					1	1	1	1					1	1	1	1			1	2	1	1	1	1	249
1288	BP	GO:0014070	response to organic cyclic compound	5	1	2	1	4	1	3	1	4	1	3	1	2	0.382	6	1	5	1	3	0.000124	9	1	4	1	4	890
1289	BP	GO:1904567	response to wortmannin	6													1	1											1
1290	BP	GO:0043331	response to dsRNA	6	1	1	1	1	1	1	1	2			1	1			1	2									78
1291	BP	GO:0043330	response to exogenous dsRNA	7							1	2							1	1									48
1292	BP	GO:0034097	response to cytokine	5	1	4	1	1	1	2	1	1	1	3	1	5	1	3	1	2	1	5	1	1	1	2	1	2	862
1293	BP	GO:0070672	response to interleukin-15	6					1	1									1	1									4
1294	BP	GO:0070669	response to interleukin-2	6													1	1											9
1295	BP	GO:0035455	response to interferon-alpha	6											1	1													19
1296	BP	GO:0070555	response to interleukin-1	6			1	1					1	2	1	1					0.288	3					1	1	119
1297	BP	GO:0034612	response to tumor necrosis factor	6																					1	2			283
1298	BP	GO:0070741	response to interleukin-6	6					1	1																			32
1299	BP	GO:0046683	response to organophosphorus	5							1	1					1	2	1	1			1	1			1	2	140
1300	BP	GO:0045472	response to ether	5			1	1	1	1															1	1			11
1301	BP	GO:0014076	response to fluoxetine	6			1	1	1	1															1	1			3
1302	BP	GO:0097305	response to alcohol	5	1	1	1	1	1	1	1	1	1	1			1	2	1	1	1	3	0.628	4	1	2	1	1	380
1303	BP	GO:0045471	response to ethanol	6							1	1	1	1			1	2	1	1	1	1			1	2			140
1304	BP	GO:0009743	response to carbohydrate	5	1	1							1	1			1	2	1	2			1	1			1	1	227
1305	BP	GO:0034284	response to monosaccharide	6	1	1							1	1			1	2	1	2			1	1			1	1	200
1306	BP	GO:0009746	response to hexose	7	1	1							1	1			1	2	1	2			1	1			1	1	191
1307	BP	GO:0009749	response to glucose	8	1	1							1	1			1	2	1	2			1	1			1	1	186
1308	BP	GO:0009725	response to hormone	5	1	1	1	3	1	3	1	3	1	1	1	5	0.138	7	1	6	1	4	0.0724	7	1	2	1	3	1080
1309	BP	GO:0034694	response to prostaglandin	6													1	1			1	1							36
1310	BP	GO:0034696	response to prostaglandin F	7																	1	1							3
1311	BP	GO:0034695	response to prostaglandin E	7													1	1											26
1312	BP	GO:0009753	response to jasmonic acid	6																			1	1					5
1313	BP	GO:0009737	response to abscisic acid	6																			1	1					1
1314	BP	GO:0097066	response to thyroid hormone	6																			1	1					22
1315	BP	GO:0048545	response to steroid hormone	6	1	1	1	1	1	1	1	1	1	1			1	3	1	2	1	1	1	3	1	2	1	2	450
1316	BP	GO:0043627	response to estrogen	7			1	1	1	1	1	1					1	1	1	1	1	1	1	2	1	2	1	1	225
1317	BP	GO:0032355	response to estradiol	8			1	1	1	1	1	1									1	1	1	1	1	1			149
1318	BP	GO:0031960	response to corticosteroid	7	1	1																							181
1319	BP	GO:0051384	response to glucocorticoid	8	1	1																							169
1320	BP	GO:0071548	response to dexamethasone	9	1	1																							34
1321	BP	GO:0032570	response to progesterone	7													1	1	1	1							1	1	42
1322	BP	GO:0033574	response to testosterone	7																			1	1					38
1323	BP	GO:0010243	response to organonitrogen compound	5			1	2	1	3	1	3			1	4	1	5	1	5	1	2	1	3	1	1	1	4	998
1324	BP	GO:1904585	response to putrescine	6			1	1	1	1																			1
1325	BP	GO:0071680	response to indole-3-methanol	6																	1	1	1	1			1	1	5
1326	BP	GO:0043279	response to alkaloid	6							1	1					1	1	1	1							1	1	147
1327	BP	GO:0042220	response to cocaine	7													1	1	1	1							1	1	51
1328	BP	GO:0071867	response to monoamine	6													1	1											35
1329	BP	GO:0071869	response to catecholamine	7													1	1											33
1330	BP	GO:1901652	response to peptide	6			1	1	1	2	1	2			1	4	1	3	1	4	1	1	1	1			1	1	652
1331	BP	GO:0043434	response to peptide hormone	7			1	1	1	2	1	2			1	4	1	3	1	4	1	1	1	1			1	1	616
1332	BP	GO:1990637	response to prolactin	8													1	1											3
1333	BP	GO:0060416	response to growth hormone	8											1	1													43
1334	BP	GO:0033762	response to glucagon	8											1	1	1	1											49
1335	BP	GO:0032868	response to insulin	8			1	1	1	1	1	2			1	3	1	1	1	4			1	1					463
1336	BP	GO:0014074	response to purine-containing compound	6							1	1					1	2	1	1							1	2	161
1337	BP	GO:0033198	response to ATP	7													1	1	1	1							1	1	32
1338	BP	GO:0051591	response to cAMP	7							1	1					1	1									1	1	103
1339	BP	GO:0043200	response to amino acid	6			1	1	1	1															1	1			117
1340	BP	GO:1901355	response to rapamycin	6			1	1	1	1																			2
1341	BP	GO:1902074	response to salt	4			1	1	1	1																			15
1342	BP	GO:1904383	response to sodium phosphate	5			1	1	1	1																			2
1343	BP	GO:0009636	response to toxic substance	4			1	1			1	3	1	2	1	1			1	1	1	1			1	1			255
1344	BP	GO:0046677	response to antibiotic	5															1	1									48
1345	BP	GO:0017085	response to insecticide	5							1	1																	12
1346	BP	GO:0046680	response to DDT	6							1	1																	1
1347	BP	GO:0051606	detection of stimulus	3	1	2							1	1			1	2	1	1	1	1	1	2			1	2	772
1348	BP	GO:0009593	detection of chemical stimulus	4													1	1	1	1							1	1	530
1349	BP	GO:0014823	response to activity	3													1	1											72
1350	BP	GO:0009607	response to biotic stimulus	3	1	5	1	4	1	3	1	5	1	2	1	3	0.00777	8	0.0892	7	1	2	1	1	1	3	1	4	984
1351	BP	GO:0002347	response to tumor cell	4									1	1			0.264	2	1	1							1	1	18
1352	BP	GO:0009605	response to external stimulus	3	1	7	1	6	1	6	1	8	1	5	1	5	0.0473	11	0.000238	14	1	6	0.11	10	1	8	1	8	2565
1353	BP	GO:0071496	cellular response to external stimulus	4													1	1					1	1	1	2			285
1354	BP	GO:0043207	response to external biotic stimulus	4	1	5	1	3	1	3	1	5	1	1	1	3	0.0603	7	0.0701	7	1	2	1	1	1	2	1	4	947
1355	BP	GO:0042330	taxis	4	1	1	1	1			1	1	1	2			1	3	1	2	1	1	1	1	1	1	1	1	870
1356	BP	GO:0006935	chemotaxis	5	1	1	1	1			1	1	1	2			1	3	1	2	1	1	1	1	1	1	1	1	870
1357	BP	GO:0050918	positive chemotaxis	6									1	2			1	2											54
1358	BP	GO:0009581	detection of external stimulus	4													1	1			1	1	1	2			1	1	197
1359	BP	GO:0009991	response to extracellular stimulus	4			1	2	1	2	1	1	1	3	1	2	1	2	0.383	5	1	2	1	4	0.681	5	1	2	552
1360	BP	GO:0031667	response to nutrient levels	5			1	2	1	2	1	1	1	3	1	2	1	2	0.296	5	1	2	1	4	1	4	1	2	522
1361	BP	GO:0007584	response to nutrient	6					1	1			1	1			1	1	1	2	1	1	1	1	1	1	1	1	205
1362	BP	GO:0033273	response to vitamin	7																					1	1			106
1363	BP	GO:0051593	response to folic acid	8																					1	1			13
1364	BP	GO:0032094	response to food	6																					1	1			38
1365	BP	GO:0060004	reflex	4																			1	1					22
1366	BP	GO:0060013	righting reflex	5																			1	1					9
1367	BP	GO:0006950	response to stress	3	0.00432	16	1	10	1	6	0.00595	16	0.000103	16	1	10	6.16e-06	19	0.0121	15	0.243	12	0.0123	14	0.0106	16	0.000103	16	4101
1368	BP	GO:0035966	response to topologically incorrect protein	4	1	1					1	2			1	1	0.0541	4	1	2							1	2	181
1369	BP	GO:0051788	response to misfolded protein	5													1	1	1	1							1	1	16
1370	BP	GO:0002236	detection of misfolded protein	6													1	1	1	1							1	1	1
1371	BP	GO:0006986	response to unfolded protein	5	1	1					1	2			1	1	0.0423	4	1	2							1	2	170
1372	BP	GO:0009611	response to wounding	4	1	4			1	2	1	3	1	2	1	2	1	5	1	3	1	3	1	4	1	1	1	4	1078
1373	BP	GO:0048678	response to axon injury	5									1	1					1	1			1	1					67
1374	BP	GO:0042060	wound healing	5	1	3			1	1	1	3	1	2	1	2	1	4	1	1	1	2	1	2			1	2	753
1375	BP	GO:0090505	epiboly involved in wound healing	6	1	1															1	1							24
1376	BP	GO:0044319	wound healing, spreading of cells	7	1	1															1	1							24
1377	BP	GO:0042246	tissue regeneration	6							1	1																	60
1378	BP	GO:0006952	defense response	4	1	4	1	2	1	3	1	3	1	7	1	5	0.0176	10	0.144	9	1	3	1	3	1	3	1	6	1867
1379	BP	GO:0006954	inflammatory response	5	1	1	1	1	1	2			1	3	1	2	0.776	5	1	3	1	2	1	2	1	1	0.331	5	656
1380	BP	GO:0090594	inflammatory response to wounding	6											1	1													7
1381	BP	GO:0002526	acute inflammatory response	6									1	1					1	1	1	2	1	1			1	2	145
1382	BP	GO:0006953	acute-phase response	7									1	1					1	1	1	1	1	1			1	1	58
1383	BP	GO:0002544	chronic inflammatory response	6													1	1	1	1							1	1	24
1384	BP	GO:0002246	wound healing involved in inflammatory response	6											1	1													7
1385	BP	GO:0006979	response to oxidative stress	4			1	3	1	2	1	2	1	1			1	3	1	2			1	1	1	4	0.0325	5	401
1386	BP	GO:0000302	response to reactive oxygen species	5			1	1	1	1	1	2					1	3	1	2					1	1	1	2	222
1387	BP	GO:0042542	response to hydrogen peroxide	6							1	1					1	2	1	1					1	1	1	1	128
1388	BP	GO:0071731	response to nitric oxide	6			1	1	1	1	1	1					1	1	1	1							1	1	23
1389	BP	GO:0006991	response to sterol depletion	4	1	1																							11
1390	BP	GO:0002931	response to ischemia	4			1	1							1	1									1	2			32
1391	BP	GO:0042594	response to starvation	4													1	2			1	1			1	1			164
1392	BP	GO:0051775	response to redox state	3																			1	1					13
1393	BP	GO:0071461	cellular response to redox state	4																			1	1					3
1394	BP	GO:0009628	response to abiotic stimulus	3	1	6	1	4	1	1	1	5	1	3	1	1	1	5	1	5	0.147	7	1	6	1	5	0.78	6	1226
1395	BP	GO:0070482	response to oxygen levels	4	1	2	1	3			1	1	1	2			1	3	1	3	1	2	1	2	1	1	1	3	334
1396	BP	GO:0036293	response to decreased oxygen levels	5	1	2	1	3			1	1	1	2			1	3	1	3	1	2	1	2	1	1	1	3	316
1397	BP	GO:0001666	response to hypoxia	6	1	2	1	3			1	1	1	2			1	3	1	3	1	2	1	2	1	1	1	3	307
1398	BP	GO:0051602	response to electrical stimulus	4			1	1	1	1	1	1													1	1			48
1399	BP	GO:0009266	response to temperature stimulus	4	1	3					1	2	1	1			1	3	1	3	1	2					1	3	234
1400	BP	GO:0009409	response to cold	5													1	1	1	2							1	1	49
1401	BP	GO:0009408	response to heat	5	1	3					1	2	1	1			1	3	1	2	1	2					0.649	3	169
1402	BP	GO:0009314	response to radiation	4	1	1	1	1			1	1			1	1	1	2			1	2	1	1	1	2			511
1403	BP	GO:0010212	response to ionizing radiation	5	1	1	1	1									1	1							1	1			149
1404	BP	GO:0010332	response to gamma radiation	6			1	1																	1	1			53
1405	BP	GO:0009416	response to light stimulus	5	1	1					1	1			1	1	1	1			1	2	1	1	1	1			374
1406	BP	GO:0009411	response to UV	6											1	1					1	1			1	1			133
1407	BP	GO:0010225	response to UV-C	7																	1	1							14
1408	BP	GO:0009648	photoperiodism	6	1	1					1	1																	24
1409	BP	GO:0009415	response to water	4																					1	1			18
1410	BP	GO:0051599	response to hydrostatic pressure	5																					1	1			7
1411	BP	GO:0009612	response to mechanical stimulus	4	1	1					1	1									1	1	1	2			1	1	221
1412	BP	GO:0006970	response to osmotic stress	4															1	1			1	1	1	1	1	1	72
1413	BP	GO:0009582	detection of abiotic stimulus	4													1	1			1	1	1	2			1	1	201
1414	BP	GO:0050982	detection of mechanical stimulus	5																	1	1	1	1			1	1	48
1415	BP	GO:0009583	detection of light stimulus	5													1	1					1	1					135
1416	BP	GO:0009584	detection of visible light	6													1	1					1	1					120
1417	BP	GO:0051716	cellular response to stimulus	3	0.114	19	0.00125	19	0.802	15	0.000145	24	0.00912	18	0.0119	21	0.0022	21	1.23e-06	26	0.102	17	5.68e-10	28	0.00665	22	6.47e-05	21	7207
1418	BP	GO:0071214	cellular response to abiotic stimulus	4													1	2	1	1	1	1	1	2	1	1			298
1419	BP	GO:0071478	cellular response to radiation	5													1	2			1	1			1	1			165
1420	BP	GO:0071482	cellular response to light stimulus	6													1	1			1	1			1	1			117
1421	BP	GO:0034644	cellular response to UV	7																	1	1			1	1			69
1422	BP	GO:0071479	cellular response to ionizing radiation	6													1	1											55
1423	BP	GO:0071260	cellular response to mechanical stimulus	5																			1	1					82
1424	BP	GO:0071216	cellular response to biotic stimulus	4			0.741	3	1	2	1	1	1	1			1	1			1	1	1	1	1	1	1	2	183
1425	BP	GO:0072396	response to cell cycle checkpoint signaling	5			1	1																	1	1			6
1426	BP	GO:0072402	response to DNA integrity checkpoint signaling	6			1	1																	1	1			6
1427	BP	GO:0072423	response to DNA damage checkpoint signaling	7			1	1																	1	1			6
1428	BP	GO:0070887	cellular response to chemical stimulus	4	1	9	0.103	10	0.842	9	1	10	1	6	1	9	0.124	11	0.16	11	0.0067	12	2.25e-06	16	1	9	0.00322	12	2852
1429	BP	GO:1901701	cellular response to oxygen-containing compound	5	1	2	1	4	1	4	1	5	1	1	1	4	0.0177	8	1	6	1	3	0.0822	7			1	5	1102
1430	BP	GO:1904588	cellular response to glycoprotein	6			1	1	1	1																			1
1431	BP	GO:1990831	cellular response to carcinoembryonic antigen	7			1	1	1	1																			1
1432	BP	GO:1901655	cellular response to ketone	6	1	1											1	2					1	1					74
1433	BP	GO:0071229	cellular response to acid chemical	5			1	1	1	1	1	1					1	1					1	2					184
1434	BP	GO:1901699	cellular response to nitrogen compound	5	1	1	1	3	1	3	1	2			1	5	1	5	0.152	6	1	1	1	2			1	3	735
1435	BP	GO:1902170	cellular response to reactive nitrogen species	6			1	1	1	1	1	1					1	1	1	1							1	1	21
1436	BP	GO:0071242	cellular response to ammonium ion	6			1	1	1	1																			32
1437	BP	GO:0097237	cellular response to toxic substance	5															1	1									24
1438	BP	GO:0071236	cellular response to antibiotic	6															1	1									15
1439	BP	GO:0071241	cellular response to inorganic substance	5			0.519	3	1	2	1	2					1	1	1	1			1	1	1	1	1	1	162
1440	BP	GO:0072715	cellular response to selenite ion	6																			1	1					1
1441	BP	GO:0071248	cellular response to metal ion	6			1	2	1	1	1	1													1	1			140
1442	BP	GO:0071279	cellular response to cobalt ion	7			1	1																	1	1			5
1443	BP	GO:0071277	cellular response to calcium ion	7			1	1	1	1																			50
1444	BP	GO:0071281	cellular response to iron ion	7							1	1																	10
1445	BP	GO:0071283	cellular response to iron(III) ion	8							1	1																	1
1446	BP	GO:0071310	cellular response to organic substance	5	1	9	1	7	1	7	1	8	1	3	1	9	0.655	9	0.79	9	0.273	9	0.000129	13	1	5	0.92	8	2347
1447	BP	GO:0097306	cellular response to alcohol	6	1	1	1	1	1	1											1	2	0.348	3			1	1	126
1448	BP	GO:0071345	cellular response to cytokine stimulus	6	1	3	1	1	1	1	1	1	1	2	1	5	1	2			1	4	1	1	1	2	1	2	760
1449	BP	GO:0071354	cellular response to interleukin-6	7					1	1																			28
1450	BP	GO:0071352	cellular response to interleukin-2	7													1	1											6
1451	BP	GO:0071347	cellular response to interleukin-1	7			1	1					1	2	1	1					0.126	3					1	1	90
1452	BP	GO:0071356	cellular response to tumor necrosis factor	7																					1	2			262
1453	BP	GO:0071363	cellular response to growth factor stimulus	6	1	2	1	3	1	2	1	2			1	2	1	2	1	3	1	2	1	5	1	2	1	2	927
1454	BP	GO:0035924	cellular response to vascular endothelial growth factor stimulus	7															1	1									40
1455	BP	GO:0071773	cellular response to BMP stimulus	7	1	1															1	1							156
1456	BP	GO:1990090	cellular response to nerve growth factor stimulus	7													1	1					1	1	1	1	1	1	37
1457	BP	GO:1990416	cellular response to brain-derived neurotrophic factor stimulus	8																			1	1	1	1			5
1458	BP	GO:0044344	cellular response to fibroblast growth factor stimulus	7											1	1	1	2	1	2							1	1	340
1459	BP	GO:0071560	cellular response to transforming growth factor beta stimulus	7					1	1	1	1					1	1	1	1			1	2	1	1	1	1	246
1460	BP	GO:0071396	cellular response to lipid	6	1	1	1	3	1	3	1	2	1	1			1	2			1	2	1	3	1	1	1	2	434
1461	BP	GO:0071398	cellular response to fatty acid	7							1	1					1	1											52
1462	BP	GO:0071407	cellular response to organic cyclic compound	6	1	2	1	3	1	2	1	1			1	1	1	3	1	2	1	2	0.0636	5	1	1	1	2	425
1463	BP	GO:0071359	cellular response to dsRNA	7	1	1	1	1	1	1					1	1			1	1									42
1464	BP	GO:0031050	dsRNA fragmentation	8	1	1	1	1	1	1					1	1			1	1									25
1465	BP	GO:1904568	cellular response to wortmannin	7													1	1											1
1466	BP	GO:0032870	cellular response to hormone stimulus	6	1	1	1	2	1	2	1	3			1	5	1	3	1	4	1	1	0.86	5	1	1			744
1467	BP	GO:0071215	cellular response to abscisic acid stimulus	7																			1	1					1
1468	BP	GO:0097067	cellular response to thyroid hormone stimulus	7																			1	1					13
1469	BP	GO:0071395	cellular response to jasmonic acid stimulus	7																			1	1					5
1470	BP	GO:0071383	cellular response to steroid hormone stimulus	7	1	1	1	1	1	1											1	1	1	1	1	1			168
1471	BP	GO:0071391	cellular response to estrogen stimulus	8			1	1	1	1											1	1			1	1			42
1472	BP	GO:0071392	cellular response to estradiol stimulus	9			1	1	1	1											1	1							31
1473	BP	GO:0071384	cellular response to corticosteroid stimulus	8	1	1																							63
1474	BP	GO:0071385	cellular response to glucocorticoid stimulus	9	1	1																							59
1475	BP	GO:0071549	cellular response to dexamethasone stimulus	10	1	1																							28
1476	BP	GO:0071394	cellular response to testosterone stimulus	8																			1	1					6
1477	BP	GO:0071379	cellular response to prostaglandin stimulus	7													1	1											25
1478	BP	GO:0071380	cellular response to prostaglandin E stimulus	8													1	1											18
1479	BP	GO:0071322	cellular response to carbohydrate stimulus	6	1	1											1	1	1	1			1	1					134
1480	BP	GO:0071326	cellular response to monosaccharide stimulus	7	1	1											1	1	1	1			1	1					124
1481	BP	GO:0071331	cellular response to hexose stimulus	8	1	1											1	1	1	1			1	1					122
1482	BP	GO:0071417	cellular response to organonitrogen compound	6			1	2	1	2	1	2			1	4	1	4	1	4	1	1	1	2			1	2	680
1483	BP	GO:0071868	cellular response to monoamine stimulus	7													1	1											31
1484	BP	GO:0071870	cellular response to catecholamine stimulus	8													1	1											30
1485	BP	GO:1904586	cellular response to putrescine	7			1	1	1	1																			1
1486	BP	GO:1901653	cellular response to peptide	7			1	1	1	1	1	2			1	4	1	3	1	4			1	1					528
1487	BP	GO:0071375	cellular response to peptide hormone stimulus	8			1	1	1	1	1	2			1	4	1	3	1	4			1	1					510
1488	BP	GO:0032869	cellular response to insulin stimulus	9			1	1	1	1	1	2			1	3	1	1	1	4			1	1					410
1489	BP	GO:0071378	cellular response to growth hormone stimulus	9											1	1													32
1490	BP	GO:0071377	cellular response to glucagon stimulus	9											1	1	1	1											38
1491	BP	GO:1990646	cellular response to prolactin	9													1	1											1
1492	BP	GO:0071230	cellular response to amino acid stimulus	7			1	1	1	1																			55
1493	BP	GO:0071681	cellular response to indole-3-methanol	7																	1	1	1	1			1	1	5
1494	BP	GO:0071320	cellular response to cAMP	7													1	1									1	1	49
1495	BP	GO:0071243	cellular response to arsenic-containing substance	5															1	1									13
1496	BP	GO:0035690	cellular response to drug	5									1	1					1	1	1	2	1	1			1	1	72
1497	BP	GO:0071466	cellular response to xenobiotic stimulus	5							1	1											1	1	1	1	1	1	196
1498	BP	GO:0006805	xenobiotic metabolic process	6							1	1											1	1	1	1	1	1	192
1499	BP	GO:0071453	cellular response to oxygen levels	5	1	1	1	1			1	1					1	1			1	1	1	1	1	1			156
1500	BP	GO:0036294	cellular response to decreased oxygen levels	6	1	1	1	1			1	1					1	1			1	1	1	1	1	1			147
1501	BP	GO:0060326	cell chemotaxis	5									1	2			1	3	1	2							1	1	236
1502	BP	GO:0030595	leukocyte chemotaxis	6									1	1			1	2	1	1							1	1	182
1503	BP	GO:0048246	macrophage chemotaxis	7													1	1	1	1							1	1	27
1504	BP	GO:0002407	dendritic cell chemotaxis	7									1	1			1	1											22
1505	BP	GO:0002548	monocyte chemotaxis	7									1	1			1	1											58
1506	BP	GO:0071621	granulocyte chemotaxis	7													1	1	1	1							1	1	103
1507	BP	GO:0033554	cellular response to stress	4	0.00818	11	0.232	8	1	4	0.00147	12	5.62e-06	13	1	7	5.65e-05	13	1	7	1	7	0.5	8	0.0946	10	0.041	9	1968
1508	BP	GO:0098780	response to mitochondrial depolarisation	5											1	1	1	2	1	1									138
1509	BP	GO:0071501	cellular response to sterol depletion	5	1	1																							10
1510	BP	GO:0006974	cellular response to DNA damage stimulus	5	0.0367	7	1	4			1	5	2.7e-05	9	1	3	1	5	1	1	1	4	1	3	0.5	6	0.00665	7	811
1511	BP	GO:0042769	DNA damage response, detection of DNA damage	6	1	2							1	1															36
1512	BP	GO:0000077	DNA damage checkpoint	6							1	3	1	1	1	1	1	1									1	1	156
1513	BP	GO:0031572	G2 DNA damage checkpoint	7							1	1	1	1															35
1514	BP	GO:0044783	G1 DNA damage checkpoint	7							1	1																	78
1515	BP	GO:0006281	DNA repair	6	0.002	7	1	3			1	2	0.00673	6	1	1	1	4	1	1	1	3	1	2	0.0434	6	0.111	5	519
1516	BP	GO:0000726	non-recombinational repair	7			1	1							1	1	1	1	1	1			1	1			1	2	74
1517	BP	GO:0006289	nucleotide-excision repair	7	0.475	3							0.0045	4			1	1					1	1	0.0165	4	1	1	116
1518	BP	GO:0006297	nucleotide-excision repair, DNA gap filling	8	0.52	2							1	1															23
1519	BP	GO:0070911	global genome nucleotide-excision repair	8	0.0736	3							1	1											0.0891	3	1	1	62
1520	BP	GO:0006283	transcription-coupled nucleotide-excision repair	8	0.12	3							0.0539	3											1	1			73
1521	BP	GO:0033683	nucleotide-excision repair, DNA incision	8	1	2							1	1															39
1522	BP	GO:0006284	base-excision repair	7	0.0433	3					1	1	1	2			1	1											52
1523	BP	GO:0006285	base-excision repair, AP site formation	8							1	1																	10
1524	BP	GO:0045007	depurination	9							1	1																	3
1525	BP	GO:0006302	double-strand break repair	7	1	2	1	1			1	1	1	2	1	1	1	1	1	1	1	1	1	1	1	3	1	3	227
1526	BP	GO:0006303	double-strand break repair via nonhomologous end joining	8			1	1							1	1	1	1	1	1			1	1			1	2	67
1527	BP	GO:0006301	postreplication repair	7	1	2							1	1													1	1	61
1528	BP	GO:0019985	translesion synthesis	8	1	2							1	1															49
1529	BP	GO:0042276	error-prone translesion synthesis	9									1	1															19
1530	BP	GO:0070987	error-free translesion synthesis	9									1	1															19
1531	BP	GO:0006298	mismatch repair	7	0.0167	3							1	1			1	1											38
1532	BP	GO:0051103	DNA ligation involved in DNA repair	7									0.0531	2			0.0781	2											10
1533	BP	GO:0000725	recombinational repair	7			1	1			1	1	1	2			1	1	1	1	1	1	1	1	1	3	0.504	3	155
1534	BP	GO:0000724	double-strand break repair via homologous recombination	8			1	1			1	1	1	2			1	1	1	1	1	1	1	1	1	3	0.504	3	155
1535	BP	GO:0006307	DNA dealkylation involved in DNA repair	7							1	1																	9
1536	BP	GO:0000731	DNA synthesis involved in DNA repair	7	1	1																							14
1537	BP	GO:0031297	replication fork processing	6							1	1			1	1													21
1538	BP	GO:0034976	response to endoplasmic reticulum stress	5	1	1			1	1					1	1	1	3	1	1					1	1	1	1	259
1539	BP	GO:0071470	cellular response to osmotic stress	5															1	1			1	1					24
1540	BP	GO:0034599	cellular response to oxidative stress	5			1	2	1	2	1	2	1	1			1	2	1	1			1	1	1	2	1	3	229
1541	BP	GO:0036473	cell death in response to oxidative stress	6							1	1	1	1			1	1							1	1	1	2	63
1542	BP	GO:0036475	neuron death in response to oxidative stress	7																							1	1	12
1543	BP	GO:0034614	cellular response to reactive oxygen species	6			1	1	1	1	1	2					1	2	1	1							1	1	133
1544	BP	GO:0097468	programmed cell death in response to reactive oxygen species	7							1	1					1	1											10
1545	BP	GO:0070301	cellular response to hydrogen peroxide	7							1	1					1	1											77
1546	BP	GO:0036474	cell death in response to hydrogen peroxide	8							1	1					1	1											21
1547	BP	GO:0010421	hydrogen peroxide-mediated programmed cell death	9							1	1					1	1											10
1548	BP	GO:0071732	cellular response to nitric oxide	7			1	1	1	1	1	1					1	1	1	1							1	1	17
1549	BP	GO:0034605	cellular response to heat	5	0.439	3					1	1	1	1			1	2	1	1	1	2					1	1	113
1550	BP	GO:0035967	cellular response to topologically incorrect protein	5	1	1									1	1	1	1											141
1551	BP	GO:0034620	cellular response to unfolded protein	6	1	1									1	1	1	1											132
1552	BP	GO:0090398	cellular senescence	5	1	1							1	1															53
1553	BP	GO:0090402	oncogene-induced cell senescence	6	1	1																							2
1554	BP	GO:0071456	cellular response to hypoxia	5	1	1	1	1			1	1					1	1			1	1	1	1	1	1			140
1555	BP	GO:0031668	cellular response to extracellular stimulus	4													1	1							1	2			207
1556	BP	GO:0031669	cellular response to nutrient levels	5													1	1							1	1			177
1557	BP	GO:0009267	cellular response to starvation	6													1	1							1	1			123
1558	BP	GO:0042149	cellular response to glucose starvation	7													1	1											30
1559	BP	GO:0016036	cellular response to phosphate starvation	7																					1	1			1
1560	BP	GO:0042262	DNA protection	5																					1	1			4
1561	BP	GO:0006955	immune response	3	1	2	1	1	1	1	1	5	0.778	7	1	5	1	7	1	6	1	2	1	3	1	3	1	4	1728
1562	BP	GO:0006959	humoral immune response	4																	1	1					1	1	203
1563	BP	GO:0002250	adaptive immune response	4							1	2	1	1	1	1	1	2	1	1	1	1	1	1			1	2	369
1564	BP	GO:0002460	adaptive immune response based on somatic recombination of immune receptors built from immunoglobulin superfamily domains	5							1	1	1	1	1	1	1	2	1	1	1	1	1	1			1	2	240
1565	BP	GO:0042088	T-helper 1 type immune response	6									1	1			1	1					1	1					36
1566	BP	GO:0019724	B cell mediated immunity	6							1	1			1	1	1	1	1	1	1	1					1	2	129
1567	BP	GO:0016064	immunoglobulin mediated immune response	7							1	1			1	1	1	1	1	1	1	1					1	2	126
1568	BP	GO:0002455	humoral immune response mediated by circulating immunoglobulin	8																	1	1					1	1	70
1569	BP	GO:0002381	immunoglobulin production involved in immunoglobulin mediated immune response	8							1	1			1	1	1	1	1	1							1	1	46
1570	BP	GO:0002456	T cell mediated immunity	6									1	1			1	2	1	1	1	1					1	2	79
1571	BP	GO:0042092	type 2 immune response	4																			1	1					32
1572	BP	GO:0002418	immune response to tumor cell	4									1	1			0.182	2	1	1							1	1	15
1573	BP	GO:0002424	T cell mediated immune response to tumor cell	5									1	1			0.00523	2	1	1							1	1	3
1574	BP	GO:0045087	innate immune response	4	1	2	1	1	1	1	1	3	0.53	6	1	4	1	6	1	4	1	2	1	1	1	1	1	3	1140
1575	BP	GO:0034341	response to interferon-gamma	5											1	2											1	1	157
1576	BP	GO:0071346	cellular response to interferon-gamma	6											1	2											1	1	136
1577	BP	GO:0034340	response to type I interferon	5	1	1					1	1	1	1	0.217	3	1	1	1	1	1	1							85
1578	BP	GO:0071357	cellular response to type I interferon	6							1	1			0.195	3													82
1579	BP	GO:0002437	inflammatory response to antigenic stimulus	4									1	2			1	2											54
1580	BP	GO:0002263	cell activation involved in immune response	4							1	1	1	1	1	1	1	2	1	2			1	1	1	1	1	1	211
1581	BP	GO:0002366	leukocyte activation involved in immune response	4							1	1	1	1	1	1	1	2	1	2			1	1	1	1	1	1	209
1582	BP	GO:0002275	myeloid cell activation involved in immune response	5									1	1			1	1							1	1			67
1583	BP	GO:0002279	mast cell activation involved in immune response	6																					1	1			42
1584	BP	GO:0043303	mast cell degranulation	7																					1	1			42
1585	BP	GO:0002285	lymphocyte activation involved in immune response	5							1	1	1	1	1	1	1	2	1	2			1	1			1	1	149
1586	BP	GO:0002281	macrophage activation involved in immune response	4									1	1			1	1											10
1587	BP	GO:0002312	B cell activation involved in immune response	4							1	1			1	1	1	1	1	2			1	1			1	1	59
1588	BP	GO:0002286	T cell activation involved in immune response	4									1	1			1	1											88
1589	BP	GO:0002287	alpha-beta T cell activation involved in immune response	5									1	1			1	1											47
1590	BP	GO:0072376	protein activation cascade	3																	1	1					1	1	98
1591	BP	GO:0032501	multicellular organismal process	2	0.0319	20	0.118	16	0.808	15	0.161	19	1	14	1	17	0.0381	19	0.000903	22	1	15	0.00173	20	0.299	19	0.00192	19	7212
1592	BP	GO:0003008	system process	3	1	2	1	1	1	2	1	2			1	1	1	4	1	1	1	3	1	5	1	4	1	5	2065
1593	BP	GO:0007588	excretion	4																					1	1			74
1594	BP	GO:0003013	circulatory system process	4	1	1			1	1	1	2			1	1	1	2			1	2	1	1			1	2	521
1595	BP	GO:0003015	heart process	5					1	1	1	1					1	2			1	1	1	1			1	2	265
1596	BP	GO:0003018	vascular process in circulatory system	5							1	1			1	1													175
1597	BP	GO:0008015	blood circulation	5	1	1			1	1	1	2			1	1	1	2			1	2	1	1			1	2	518
1598	BP	GO:0060047	heart contraction	6					1	1	1	1					1	2			1	1	1	1			1	2	263
1599	BP	GO:0003014	renal system process	4																					1	1			117
1600	BP	GO:0003012	muscle system process	4	1	1	1	1	1	2	1	1					1	3	1	1	1	2	1	2	1	1	0.0313	5	398
1601	BP	GO:0043500	muscle adaptation	5					1	1																	1	2	88
1602	BP	GO:0014888	striated muscle adaptation	6					1	1																	1	1	42
1603	BP	GO:0043501	skeletal muscle adaptation	7					1	1																	1	1	26
1604	BP	GO:0006936	muscle contraction	5	1	1	1	1	1	2	1	1					1	3	1	1	1	2	1	2	1	1	1	3	328
1605	BP	GO:0006941	striated muscle contraction	6					1	1	1	1					1	2			1	1	1	1	1	1	1	2	150
1606	BP	GO:0060048	cardiac muscle contraction	7					1	1	1	1					1	2			1	1	1	1			1	2	114
1607	BP	GO:0086003	cardiac muscle cell contraction	8					1	1							1	1			1	1	1	1			1	2	46
1608	BP	GO:0030049	muscle filament sliding	6													1	1	1	1							1	1	39
1609	BP	GO:0090075	relaxation of muscle	5					1	1																			29
1610	BP	GO:0055119	relaxation of cardiac muscle	6					1	1																			16
1611	BP	GO:0014896	muscle hypertrophy	5																							1	1	63
1612	BP	GO:0014897	striated muscle hypertrophy	6																							1	1	61
1613	BP	GO:0003300	cardiac muscle hypertrophy	7																							1	1	59
1614	BP	GO:0003298	physiological muscle hypertrophy	6																							1	1	17
1615	BP	GO:0050877	neurological system process	4	1	1											1	1			1	1	1	2	1	3			1347
1616	BP	GO:0050890	cognition	5																	1	1	1	1	1	3			274
1617	BP	GO:0007600	sensory perception	5	1	1											1	1					1	1	1	1			995
1618	BP	GO:0050954	sensory perception of mechanical stimulus	6																			1	1					164
1619	BP	GO:0007605	sensory perception of sound	7																			1	1					147
1620	BP	GO:0019233	sensory perception of pain	6																					1	1			105
1621	BP	GO:0007606	sensory perception of chemical stimulus	6													1	1											546
1622	BP	GO:0050909	sensory perception of taste	7													1	1											65
1623	BP	GO:0050953	sensory perception of light stimulus	6	1	1																							215
1624	BP	GO:0007601	visual perception	7	1	1																							212
1625	BP	GO:0044707	single-multicellular organism process	3	0.188	17	0.0768	15	0.555	14	0.0181	19	0.421	14	1	15	0.00392	19	5.78e-05	22	0.874	14	0.000748	19	0.0354	19	0.024	16	6175
1626	BP	GO:0042303	molting cycle	4	1	1																			1	2			109
1627	BP	GO:0042633	hair cycle	5	1	1																			1	2			109
1628	BP	GO:0050879	multicellular organismal movement	4																					1	1			50
1629	BP	GO:0050881	musculoskeletal movement	5																					1	1			50
1630	BP	GO:0003009	skeletal muscle contraction	6																					1	1			39
1631	BP	GO:0090130	tissue migration	4									1	1			1	2	1	2							1	1	228
1632	BP	GO:0090132	epithelium migration	5									1	1			1	2	1	2							1	1	223
1633	BP	GO:0010631	epithelial cell migration	6									1	1			1	2	1	2							1	1	220
1634	BP	GO:0043542	endothelial cell migration	7									1	1			1	2	1	2							1	1	152
1635	BP	GO:0043534	blood vessel endothelial cell migration	8									1	1			1	2	1	1							1	1	72
1636	BP	GO:0035767	endothelial cell chemotaxis	8									1	1			0.516	2	0.512	2							1	1	25
1637	BP	GO:0032941	secretion by tissue	4					1	1					1	1							1	2					90
1638	BP	GO:0035637	multicellular organismal signaling	4					1	1							1	1			1	1	1	1			1	1	189
1639	BP	GO:0022404	molting cycle process	4	1	1																			1	2			88
1640	BP	GO:0022405	hair cycle process	5	1	1																			1	2			88
1641	BP	GO:0007586	digestion	4																			1	1					172
1642	BP	GO:0022600	digestive system process	5																			1	1					96
1643	BP	GO:0044241	lipid digestion	5																			1	1					28
1644	BP	GO:0050817	coagulation	4	1	1			1	1	1	1	1	1	1	2	1	3	1	1			1	2			1	2	579
1645	BP	GO:0030431	sleep	4																			1	1					38
1646	BP	GO:0097242	beta-amyloid clearance	4			1	1																					7
1647	BP	GO:0001816	cytokine production	4	1	1					1	3	1	4	1	1	0.729	5	1	4	1	1	1	2	1	1	1	3	647
1648	BP	GO:0071706	tumor necrosis factor superfamily cytokine production	5									1	1			1	2	1	1							1	1	107
1649	BP	GO:0032640	tumor necrosis factor production	6									1	1			1	2	1	1							1	1	102
1650	BP	GO:0032612	interleukin-1 production	5									1	1			1	2							1	1			68
1651	BP	GO:0032610	interleukin-1 alpha production	6																					1	1			8
1652	BP	GO:0032611	interleukin-1 beta production	6									1	1			1	2											58
1653	BP	GO:0071604	transforming growth factor beta production	5							1	1					1	1	1	1							1	1	27
1654	BP	GO:0032905	transforming growth factor beta1 production	6							1	1					1	1	1	1							1	1	9
1655	BP	GO:0032604	granulocyte macrophage colony-stimulating factor production	5																			1	1					15
1656	BP	GO:0032615	interleukin-12 production	5									1	1			0.0402	3	1	2							1	2	55
1657	BP	GO:0032606	type I interferon production	5	1	1					1	1	0.00645	4			0.0134	4	1	2			1	1			1	1	127
1658	BP	GO:0032607	interferon-alpha production	6									1	1			0.362	2	1	1							1	1	21
1659	BP	GO:0032608	interferon-beta production	6	1	1							1	2			1	2	1	1									48
1660	BP	GO:0032635	interleukin-6 production	5									1	1			1	2	1	1							1	1	110
1661	BP	GO:0032620	interleukin-17 production	5																			1	1					26
1662	BP	GO:0032616	interleukin-13 production	5																			1	1					20
1663	BP	GO:0032609	interferon-gamma production	5									1	1			1	2	1	1			1	1			1	1	105
1664	BP	GO:0032637	interleukin-8 production	5															1	1									67
1665	BP	GO:0032602	chemokine production	5															1	1			1	1					73
1666	BP	GO:0071609	chemokine (C-C motif) ligand 5 production	6															1	1									7
1667	BP	GO:0032613	interleukin-10 production	5									1	1			1	2	1	1							1	1	44
1668	BP	GO:0032623	interleukin-2 production	5																			1	1					60
1669	BP	GO:0002367	cytokine production involved in immune response	5													1	1	1	1	1	1					1	2	70
1670	BP	GO:0002369	T cell cytokine production	6																	1	1					1	1	25
1671	BP	GO:0035743	CD4-positive, alpha-beta T cell cytokine production	7																	1	1					1	1	9
1672	BP	GO:0002368	B cell cytokine production	6													1	1	1	1							1	1	2
1673	BP	GO:0042089	cytokine biosynthetic process	5													1	1	1	1			1	1			1	1	113
1674	BP	GO:0042533	tumor necrosis factor biosynthetic process	6													1	1	1	1							1	1	19
1675	BP	GO:0042095	interferon-gamma biosynthetic process	6																			1	1					17
1676	BP	GO:0042094	interleukin-2 biosynthetic process	6																			1	1					22
1677	BP	GO:0042033	chemokine biosynthetic process	6																			1	1					14
1678	BP	GO:0042253	granulocyte macrophage colony-stimulating factor biosynthetic process	6																			1	1					5
1679	BP	GO:0042231	interleukin-13 biosynthetic process	6																			1	1					2
1680	BP	GO:0050663	cytokine secretion	5									1	1			1	1	1	1					1	1			170
1681	BP	GO:0072604	interleukin-6 secretion	6									1	1			1	1											24
1682	BP	GO:0050701	interleukin-1 secretion	6									1	1			1	1							1	1			39
1683	BP	GO:0050703	interleukin-1 alpha secretion	7																					1	1			5
1684	BP	GO:0050702	interleukin-1 beta secretion	7									1	1			1	1											35
1685	BP	GO:0072606	interleukin-8 secretion	6															1	1									23
1686	BP	GO:1990774	tumor necrosis factor secretion	6									1	1			1	1											6
1687	BP	GO:0001503	ossification	4	1	3					1	3	1	2	1	2			1	1	1	2			1	2	0.443	4	376
1688	BP	GO:0001649	osteoblast differentiation	5	1	3					1	2	1	2	1	2			1	1	1	2			1	1	0.046	4	209
1689	BP	GO:0048771	tissue remodeling	4					1	1			0.485	3			1	1	1	1	1	1	1	2	1	1	1	1	153
1690	BP	GO:0046849	bone remodeling	5					1	1			1	2					1	1	1	1	1	1			1	1	79
1691	BP	GO:0033555	multicellular organismal response to stress	4													1	1	1	2			1	1	1	2	1	1	80
1692	BP	GO:0048265	response to pain	5													1	1	1	1					1	1	1	1	34
1693	BP	GO:0042596	fear response	5																					1	1			39
1694	BP	GO:0007275	multicellular organismal development	4	1	13	0.158	13	1	12	0.0791	16	1	10	1	12	0.022	16	0.00153	18	1	12	0.00566	16	1	14	1	10	5038
1695	BP	GO:0048731	system development	5	1	11	0.224	12	1	11	1	13	1	8	1	10	0.107	14	0.0349	15	1	10	0.0337	14	1	13	1	10	4482
1696	BP	GO:0061008	hepaticobiliary system development	6			1	2	1	1											1	1					1	1	151
1697	BP	GO:0055123	digestive system development	6	1	1	1	1			1	1													1	1			160
1698	BP	GO:0048513	animal organ development	6	1	6	1	8	1	8	1	8	1	6	1	8	1	10	1	8	0.605	10	1	9	1	7	1	7	3212
1699	BP	GO:0048732	gland development	7			1	3	1	2					1	2					1	1	1	3	1	1	1	1	472
1700	BP	GO:0030879	mammary gland development	8					1	1					1	1							1	2	1	1			148
1701	BP	GO:0001889	liver development	8			1	2	1	1											1	1					1	1	148
1702	BP	GO:0007423	sensory organ development	7							1	1					1	2	1	1	1	1					1	1	545
1703	BP	GO:0001654	eye development	8							1	1					1	2	1	1	1	1					1	1	360
1704	BP	GO:0043010	camera-type eye development	9							1	1					1	2	1	1	1	1					1	1	314
1705	BP	GO:0060041	retina development in camera-type eye	10													1	1											151
1706	BP	GO:0002088	lens development in camera-type eye	10							1	1					1	1	1	1							1	1	72
1707	BP	GO:0070306	lens fiber cell differentiation	11													1	1	1	1							1	1	29
1708	BP	GO:0070307	lens fiber cell development	12													1	1	1	1							1	1	14
1709	BP	GO:0043588	skin development	7	1	1					1	1									1	1	1	1	1	2	1	1	255
1710	BP	GO:0098773	skin epidermis development	8	1	1																			1	2			90
1711	BP	GO:0001942	hair follicle development	9	1	1																			1	2			88
1712	BP	GO:0031069	hair follicle morphogenesis	10																					1	1			30
1713	BP	GO:0030216	keratinocyte differentiation	8							1	1													1	1			129
1714	BP	GO:0009887	organ morphogenesis	7	1	1	1	1			1	2			1	2	1	1	1	1	1	2	1	3	1	1	1	1	965
1715	BP	GO:0090596	sensory organ morphogenesis	8																	1	1							272
1716	BP	GO:0048592	eye morphogenesis	9																	1	1							157
1717	BP	GO:0048593	camera-type eye morphogenesis	10																	1	1							117
1718	BP	GO:0022612	gland morphogenesis	8											1	1							1	1	1	1			135
1719	BP	GO:0060443	mammary gland morphogenesis	9																					1	1			55
1720	BP	GO:0060056	mammary gland involution	10																					1	1			10
1721	BP	GO:0031214	biomineral tissue development	7																					1	1			136
1722	BP	GO:0030282	bone mineralization	8																					1	1			103
1723	BP	GO:0060485	mesenchyme development	7			1	1	1	1	1	1					1	1	1	1							1	1	248
1724	BP	GO:0048762	mesenchymal cell differentiation	8			1	1	1	1	1	1																	188
1725	BP	GO:0014031	mesenchymal cell development	9			1	1	1	1	1	1																	175
1726	BP	GO:0031100	organ regeneration	7							1	1																	84
1727	BP	GO:0007517	muscle organ development	7	1	1					1	2			1	3	1	1			1	1			1	1	1	1	366
1728	BP	GO:0060538	skeletal muscle organ development	8							1	1			1	2					1	1			1	1			182
1729	BP	GO:0007519	skeletal muscle tissue development	9							1	1			1	2					1	1			1	1			170
1730	BP	GO:0035914	skeletal muscle cell differentiation	10							1	1			1	1					1	1			1	1			69
1731	BP	GO:0060612	adipose tissue development	7	1	1											1	1			1	1	1	1					36
1732	BP	GO:0060613	fat pad development	8																			1	1					8
1733	BP	GO:0007399	nervous system development	6	1	7	1	7	1	5	1	5	1	5	1	2	1	7	0.979	9	1	1	1	6	1	8	1	2	2418
1734	BP	GO:0007272	ensheathment of neurons	7	1	1											1	1	1	1			1	1					113
1735	BP	GO:0008366	axon ensheathment	8	1	1											1	1	1	1			1	1					113
1736	BP	GO:0042552	myelination	9	1	1											1	1	1	1			1	1					110
1737	BP	GO:0021675	nerve development	7																			1	1					72
1738	BP	GO:0022008	neurogenesis	7	1	4	1	4	1	3	1	4	1	4			1	4	0.488	8			1	4	1	4	1	2	1727
1739	BP	GO:0042063	gliogenesis	8													1	1	1	1					1	1	1	1	242
1740	BP	GO:0010001	glial cell differentiation	9													1	1	1	1							1	1	186
1741	BP	GO:0021782	glial cell development	10													1	1	1	1							1	1	80
1742	BP	GO:0014009	glial cell proliferation	9																					1	1			30
1743	BP	GO:0048699	generation of neurons	8	1	3	1	4	1	3	1	4	1	4			1	4	0.353	8			1	4	1	2	1	2	1646
1744	BP	GO:0030182	neuron differentiation	9	1	2	1	4	1	3	1	4	1	3			1	3	0.217	8			1	4	1	2	1	2	1532
1745	BP	GO:0048666	neuron development	10	1	1	1	3	1	3	1	4	1	3			1	3	0.429	7			1	4	1	2	1	2	1269
1746	BP	GO:0007405	neuroblast proliferation	9															1	1									59
1747	BP	GO:0055057	neuroblast division	10															1	1									13
1748	BP	GO:0055059	asymmetric neuroblast division	11															1	1									5
1749	BP	GO:0045196	establishment or maintenance of neuroblast polarity	12															1	1									3
1750	BP	GO:0045200	establishment of neuroblast polarity	13															1	1									3
1751	BP	GO:0061458	reproductive system development	6	1	1	1	2	1	1			1	1	1	1	1	1	1	1	1	1			1	1			461
1752	BP	GO:0072359	circulatory system development	6	1	3	1	1	1	1	1	1	1	1	1	2	1	3	1	1	1	2	1	2			1	3	987
1753	BP	GO:0060541	respiratory system development	6							1	3			1	1							1	1					228
1754	BP	GO:0001501	skeletal system development	6	1	1					1	1			1	1	1	1	1	1	1	3	1	1			1	1	507
1755	BP	GO:0060348	bone development	7													1	1	1	1	1	2					1	1	181
1756	BP	GO:0048705	skeletal system morphogenesis	7													1	1	1	1			1	1			1	1	218
1757	BP	GO:0060349	bone morphogenesis	8													1	1	1	1							1	1	88
1758	BP	GO:0060350	endochondral bone morphogenesis	9													1	1	1	1							1	1	53
1759	BP	GO:0051216	cartilage development	7	1	1									1	1	1	1	1	1	1	1					1	1	189
1760	BP	GO:0060591	chondroblast differentiation	8	1	1															1	1							5
1761	BP	GO:0060351	cartilage development involved in endochondral bone morphogenesis	8													1	1	1	1							1	1	27
1762	BP	GO:0001655	urogenital system development	6	1	1	1	2							1	1					1	1							334
1763	BP	GO:0007417	central nervous system development	6	1	4	1	3	1	2	1	1					1	2	1	1	1	1	1	1	1	2	1	1	951
1764	BP	GO:0021510	spinal cord development	7			1	1																					112
1765	BP	GO:0007420	brain development	7	1	4	1	2	1	2							1	1			1	1	1	1	1	2			719
1766	BP	GO:0030901	midbrain development	8																					1	1			89
1767	BP	GO:0021762	substantia nigra development	9																					1	1			48
1768	BP	GO:0030902	hindbrain development	8	1	2	1	1	1	1																			159
1769	BP	GO:0022037	metencephalon development	9	1	2	1	1	1	1																			115
1770	BP	GO:0021549	cerebellum development	10	1	2	1	1	1	1																			103
1771	BP	GO:0021695	cerebellar cortex development	11	1	2																							54
1772	BP	GO:0021680	cerebellar Purkinje cell layer development	12	1	1																							30
1773	BP	GO:0021575	hindbrain morphogenesis	9	1	1																							47
1774	BP	GO:0021587	cerebellum morphogenesis	10	1	1																							43
1775	BP	GO:0021696	cerebellar cortex morphogenesis	11	1	1																							36
1776	BP	GO:0021692	cerebellar Purkinje cell layer morphogenesis	12	1	1																							17
1777	BP	GO:0021697	cerebellar cortex formation	12	1	1																							26
1778	BP	GO:0021694	cerebellar Purkinje cell layer formation	13	1	1																							14
1779	BP	GO:0021533	cell differentiation in hindbrain	9	1	1																							25
1780	BP	GO:0030900	forebrain development	8	1	1																	1	1	1	1			392
1781	BP	GO:0021536	diencephalon development	9	1	1																							83
1782	BP	GO:0021794	thalamus development	10	1	1																							15
1783	BP	GO:0021537	telencephalon development	9	1	1																	1	1	1	1			250
1784	BP	GO:0021543	pallium development	10	1	1																							169
1785	BP	GO:0021544	subpallium development	10	1	1																							23
1786	BP	GO:0021756	striatum development	11	1	1																							17
1787	BP	GO:0021988	olfactory lobe development	10	1	1																							39
1788	BP	GO:0021772	olfactory bulb development	11	1	1																							37
1789	BP	GO:0061034	olfactory bulb mitral cell layer development	12	1	1																							2
1790	BP	GO:0021846	cell proliferation in forebrain	9																			1	1					33
1791	BP	GO:0021872	forebrain generation of neurons	9	1	1																							74
1792	BP	GO:0021885	forebrain cell migration	9	1	1																							67
1793	BP	GO:0022029	telencephalon cell migration	10	1	1																							64
1794	BP	GO:0022028	tangential migration from the subventricular zone to the olfactory bulb	11	1	1																							9
1795	BP	GO:0021953	central nervous system neuron differentiation	7	1	2																							182
1796	BP	GO:0021859	pyramidal neuron differentiation	8	1	1																							12
1797	BP	GO:0021954	central nervous system neuron development	8	1	1																							76
1798	BP	GO:0021879	forebrain neuron differentiation	8	1	1																							67
1799	BP	GO:0021884	forebrain neuron development	9	1	1																							37
1800	BP	GO:0021860	pyramidal neuron development	10	1	1																							11
1801	BP	GO:0021702	cerebellar Purkinje cell differentiation	8	1	1																							13
1802	BP	GO:0048708	astrocyte differentiation	7													1	1	1	1							1	1	66
1803	BP	GO:0060020	Bergmann glial cell differentiation	8													1	1	1	1							1	1	10
1804	BP	GO:0014002	astrocyte development	8													1	1	1	1							1	1	20
1805	BP	GO:0072001	renal system development	6			1	1							1	1					1	1							291
1806	BP	GO:0001822	kidney development	7			1	1							1	1					1	1							274
1807	BP	GO:0001823	mesonephros development	8											1	1													105
1808	BP	GO:0072006	nephron development	8											1	1					1	1							133
1809	BP	GO:0001656	metanephros development	8																	1	1							93
1810	BP	GO:0060993	kidney morphogenesis	8											1	1													94
1811	BP	GO:0072028	nephron morphogenesis	9											1	1													79
1812	BP	GO:0072073	kidney epithelium development	8											1	1					1	1							142
1813	BP	GO:0072009	nephron epithelium development	9											1	1					1	1							109
1814	BP	GO:0072088	nephron epithelium morphogenesis	10											1	1													77
1815	BP	GO:0072163	mesonephric epithelium development	9											1	1													101
1816	BP	GO:0072207	metanephric epithelium development	9																	1	1							28
1817	BP	GO:0072243	metanephric nephron epithelium development	10																	1	1							24
1818	BP	GO:0002520	immune system development	6	1	2	1	1	1	2	1	2	0.103	6	1	3	0.285	6	0.32	6	1	3	1	3	1	2	1	4	843
1819	BP	GO:0002200	somatic diversification of immune receptors	7	1	1					1	1	1	2	1	2	0.0664	3	1	1							1	1	65
1820	BP	GO:0002562	somatic diversification of immune receptors via germline recombination within a single locus	8	1	1					1	1	1	2	1	1	0.038	3	1	1							1	1	54
1821	BP	GO:0033151	V(D)J recombination	9									0.107	2			0.158	2											14
1822	BP	GO:0002566	somatic diversification of immune receptors via somatic mutation	8	1	1									1	1													18
1823	BP	GO:0016445	somatic diversification of immunoglobulins	8	1	1					1	1			1	1	1	1	1	1							1	1	54
1824	BP	GO:0002208	somatic diversification of immunoglobulins involved in immune response	9							1	1			1	1	1	1	1	1							1	1	39
1825	BP	GO:0016446	somatic hypermutation of immunoglobulin genes	9	1	1																							17
1826	BP	GO:0016447	somatic recombination of immunoglobulin gene segments	9	1	1					1	1			1	1	1	1	1	1							1	1	44
1827	BP	GO:0002204	somatic recombination of immunoglobulin genes involved in immune response	10							1	1			1	1	1	1	1	1							1	1	39
1828	BP	GO:0045190	isotype switching	11							1	1			1	1	1	1	1	1							1	1	39
1829	BP	GO:0048290	isotype switching to IgA isotypes	12							1	1			1	1													4
1830	BP	GO:0048291	isotype switching to IgG isotypes	12													1	1	1	1							1	1	11
1831	BP	GO:0048534	hematopoietic or lymphoid organ development	7	1	1	1	1	1	2	1	1	0.0745	6	1	2	1	5	1	5	1	3	1	3	1	2	1	3	795
1832	BP	GO:0030097	hemopoiesis	8	1	1	1	1	1	2	1	1	0.0535	6	1	2	1	5	1	5	1	3	1	3	1	2	1	3	749
1833	BP	GO:0060216	definitive hemopoiesis	9											1	1					1	1							24
1834	BP	GO:0002244	hematopoietic progenitor cell differentiation	9			1	1					1	1	1	1	1	2	1	1			1	1	1	1	1	1	160
1835	BP	GO:0002521	leukocyte differentiation	9					1	1			1	4	1	1	1	3	1	4	1	2	1	2			1	1	470
1836	BP	GO:0097028	dendritic cell differentiation	10									1	1			1	1											43
1837	BP	GO:0030098	lymphocyte differentiation	10					1	1			1	3	1	1	1	1	1	2	1	1	1	1					314
1838	BP	GO:0030183	B cell differentiation	11									1	1					1	1			1	1					117
1839	BP	GO:0002335	mature B cell differentiation	12															1	1			1	1					18
1840	BP	GO:0002313	mature B cell differentiation involved in immune response	13															1	1			1	1					14
1841	BP	GO:0002317	plasma cell differentiation	14															1	1			1	1					4
1842	BP	GO:0030217	T cell differentiation	11					1	1			1	2	1	1	1	1	1	1	1	1							213
1843	BP	GO:0045065	cytotoxic T cell differentiation	12																	1	1							3
1844	BP	GO:0033077	T cell differentiation in thymus	12									1	1															76
1845	BP	GO:0033080	immature T cell proliferation in thymus	13									1	1															9
1846	BP	GO:0046632	alpha-beta T cell differentiation	12					1	1			1	1	1	1	1	1	1	1									84
1847	BP	GO:0043367	CD4-positive, alpha-beta T cell differentiation	13									1	1			1	1											58
1848	BP	GO:0002292	T cell differentiation involved in immune response	12									1	1			1	1											54
1849	BP	GO:0002293	alpha-beta T cell differentiation involved in immune response	13									1	1			1	1											47
1850	BP	GO:0002294	CD4-positive, alpha-beta T cell differentiation involved in immune response	14									1	1			1	1											46
1851	BP	GO:0042093	T-helper cell differentiation	15									1	1			1	1											44
1852	BP	GO:0045063	T-helper 1 cell differentiation	16									1	1			1	1											17
1853	BP	GO:0030099	myeloid cell differentiation	9	1	1	1	1	1	1	1	1	1	2	1	1	0.654	4	1	3	1	1	1	2	1	1	1	3	346
1854	BP	GO:0061515	myeloid cell development	10																					1	1			52
1855	BP	GO:0030219	megakaryocyte differentiation	10			1	1					1	1			1	2	1	1			1	1			1	1	50
1856	BP	GO:0002573	myeloid leukocyte differentiation	10									1	1			1	2	1	2	1	1	1	1			1	1	194
1857	BP	GO:0030316	osteoclast differentiation	11									1	1					1	1	1	1	1	1			1	1	89
1858	BP	GO:0030224	monocyte differentiation	11													0.697	2	1	1									29
1859	BP	GO:0048536	spleen development	8									1	1							1	1							43
1860	BP	GO:0002507	tolerance induction	7									1	1			1	1											29
1861	BP	GO:0072358	cardiovascular system development	6	1	3	1	1	1	1	1	1	1	1	1	2	1	3	1	1	1	2	1	2			1	3	987
1862	BP	GO:0007507	heart development	7	1	3	1	1	1	1	1	1			1	1	1	2	1	1	1	1	1	1			1	2	538
1863	BP	GO:0003170	heart valve development	8	1	1															1	1							37
1864	BP	GO:0003171	atrioventricular valve development	9	1	1															1	1							21
1865	BP	GO:0003179	heart valve morphogenesis	9	1	1															1	1							31
1866	BP	GO:0003181	atrioventricular valve morphogenesis	10	1	1															1	1							18
1867	BP	GO:0007512	adult heart development	8	1	1																							16
1868	BP	GO:0003205	cardiac chamber development	8	1	1															1	1							151
1869	BP	GO:0003230	cardiac atrium development	9	1	1															1	1							32
1870	BP	GO:0003231	cardiac ventricle development	9	1	1															1	1							111
1871	BP	GO:0003279	cardiac septum development	9	1	1															1	1							93
1872	BP	GO:0003283	atrial septum development	10	1	1															1	1							19
1873	BP	GO:0003281	ventricular septum development	10	1	1															1	1							59
1874	BP	GO:0003007	heart morphogenesis	8	1	1											1	1	1	1	1	1	1	1			1	1	229
1875	BP	GO:0003206	cardiac chamber morphogenesis	9	1	1															1	1							105
1876	BP	GO:0003209	cardiac atrium morphogenesis	10	1	1															1	1							27
1877	BP	GO:0060411	cardiac septum morphogenesis	10	1	1															1	1							51
1878	BP	GO:0060413	atrial septum morphogenesis	11	1	1															1	1							14
1879	BP	GO:0003151	outflow tract morphogenesis	9													1	1	1	1							1	1	61
1880	BP	GO:0003278	apoptotic process involved in heart morphogenesis	9	1	1															1	1							5
1881	BP	GO:0003197	endocardial cushion development	8													1	1	1	1							1	1	33
1882	BP	GO:0048738	cardiac muscle tissue development	8	1	1					1	1			1	1											1	1	182
1883	BP	GO:0035051	cardiocyte differentiation	8	1	1					1	1															1	1	121
1884	BP	GO:0055006	cardiac cell development	9	1	1					1	1															1	1	64
1885	BP	GO:0055007	cardiac muscle cell differentiation	9	1	1					1	1															1	1	99
1886	BP	GO:0055012	ventricular cardiac muscle cell differentiation	10	1	1					1	1																	20
1887	BP	GO:0055013	cardiac muscle cell development	10	1	1					1	1															1	1	62
1888	BP	GO:0055015	ventricular cardiac muscle cell development	11	1	1					1	1																	13
1889	BP	GO:0001944	vasculature development	6	1	1							1	1			1	2	1	1	1	1	1	1			1	2	630
1890	BP	GO:0001568	blood vessel development	7	1	1							1	1			1	2	1	1	1	1	1	1			1	2	607
1891	BP	GO:0048514	blood vessel morphogenesis	8	1	1							1	1			1	2	1	1	1	1	1	1			1	2	511
1892	BP	GO:0001525	angiogenesis	9	1	1							1	1			1	2	1	1	1	1	1	1			1	2	430
1893	BP	GO:0002041	intussusceptive angiogenesis	10	1	1															1	1							2
1894	BP	GO:0002040	sprouting angiogenesis	10									1	1			1	2	1	1							1	1	64
1895	BP	GO:0021591	ventricular system development	6	1	1																			1	1			29
1896	BP	GO:0021670	lateral ventricle development	7																					1	1			13
1897	BP	GO:0021761	limbic system development	6	1	1																							107
1898	BP	GO:0021766	hippocampus development	7	1	1																							77
1899	BP	GO:0035295	tube development	5	1	1	1	1			1	4			1	2					1	1	1	1	1	1			635
1900	BP	GO:0035239	tube morphogenesis	6							1	1			1	1													384
1901	BP	GO:0060562	epithelial tube morphogenesis	7							1	1			1	1													342
1902	BP	GO:0030323	respiratory tube development	6							1	3			1	1							1	1					200
1903	BP	GO:0030324	lung development	7							1	3			1	1							1	1					196
1904	BP	GO:0060428	lung epithelium development	8							1	1											1	1					46
1905	BP	GO:0060425	lung morphogenesis	8							1	2			1	1													58
1906	BP	GO:0060502	epithelial cell proliferation involved in lung morphogenesis	9							1	1																	11
1907	BP	GO:0060479	lung cell differentiation	8																			1	1					31
1908	BP	GO:0060487	lung epithelial cell differentiation	9																			1	1					30
1909	BP	GO:0060509	Type I pneumocyte differentiation	10																			1	1					8
1910	BP	GO:0048565	digestive tract development	6	1	1	1	1			1	1													1	1			146
1911	BP	GO:0060575	intestinal epithelial cell differentiation	7			1	1																	1	1			18
1912	BP	GO:0060576	intestinal epithelial cell development	8			1	1																	1	1			12
1913	BP	GO:0061326	renal tubule development	6											1	1					1	1							97
1914	BP	GO:0072080	nephron tubule development	7											1	1					1	1							94
1915	BP	GO:0072014	proximal tubule development	8																	1	1							5
1916	BP	GO:0072019	proximal convoluted tubule development	9																	1	1							2
1917	BP	GO:0061333	renal tubule morphogenesis	7											1	1													79
1918	BP	GO:0072078	nephron tubule morphogenesis	8											1	1													75
1919	BP	GO:0072164	mesonephric tubule development	6											1	1													101
1920	BP	GO:0072171	mesonephric tubule morphogenesis	7											1	1													67
1921	BP	GO:0001657	ureteric bud development	7											1	1													100
1922	BP	GO:0060675	ureteric bud morphogenesis	8											1	1													66
1923	BP	GO:0072170	metanephric tubule development	6																	1	1							24
1924	BP	GO:0072234	metanephric nephron tubule development	7																	1	1							21
1925	BP	GO:0072237	metanephric proximal tubule development	8																	1	1							3
1926	BP	GO:0072229	metanephric proximal convoluted tubule development	8																	1	1							2
1927	BP	GO:0009790	embryo development	5	1	4	1	1	1	2	1	6			1	2	1	1	1	3	1	4	1	4	1	1	1	1	1030
1928	BP	GO:0009792	embryo development ending in birth or egg hatching	6	1	2	1	1	1	2	1	4			1	2	1	1	1	2	1	2	1	4	1	1			644
1929	BP	GO:0043009	chordate embryonic development	7	1	2	1	1	1	1	1	4			1	2	1	1	1	1	1	2	1	4	1	1			636
1930	BP	GO:0001701	in utero embryonic development	8	1	2	1	1	1	1	1	4			1	2	1	1	1	1	1	2	1	3	1	1			377
1931	BP	GO:0001824	blastocyst development	9			1	1	1	1									1	1	1	1	1	1					77
1932	BP	GO:0001832	blastocyst growth	10					1	1													1	1					23
1933	BP	GO:0001825	blastocyst formation	10			1	1	1	1									1	1	1	1							36
1934	BP	GO:0001829	trophectodermal cell differentiation	11			1	1	1	1																			19
1935	BP	GO:0001826	inner cell mass cell differentiation	11					1	1																			8
1936	BP	GO:0048706	embryonic skeletal system development	8																			1	1					130
1937	BP	GO:0021915	neural tube development	8							1	1			1	1													168
1938	BP	GO:0048598	embryonic morphogenesis	6	1	2			1	1	1	2									1	1	1	2			1	1	608
1939	BP	GO:0007369	gastrulation	7	1	1			1	1	1	1											1	1			1	1	182
1940	BP	GO:0001702	gastrulation with mouth forming second	8	1	1																							30
1941	BP	GO:0001704	formation of primary germ layer	8					1	1	1	1											1	1			1	1	120
1942	BP	GO:0001706	endoderm formation	9					1	1	1	1											1	1			1	1	56
1943	BP	GO:0035987	endodermal cell differentiation	10					1	1	1	1											1	1			1	1	45
1944	BP	GO:0060795	cell fate commitment involved in formation of primary germ layer	9					1	1	1	1											1	1			1	1	35
1945	BP	GO:0001711	endodermal cell fate commitment	10					1	1	1	1											1	1			1	1	16
1946	BP	GO:0010172	embryonic body morphogenesis	7							1	1																	13
1947	BP	GO:0048568	embryonic organ development	6	1	1															1	2	1	1	1	1			449
1948	BP	GO:0048562	embryonic organ morphogenesis	7																			1	1					305
1949	BP	GO:0048704	embryonic skeletal system morphogenesis	8																			1	1					97
1950	BP	GO:0048701	embryonic cranial skeleton morphogenesis	9																			1	1					46
1951	BP	GO:0035162	embryonic hemopoiesis	7																	1	1							25
1952	BP	GO:0007389	pattern specification process	4	1	1													1	1	1	2							467
1953	BP	GO:0003002	regionalization	5	1	1													1	1	1	2							350
1954	BP	GO:0009952	anterior/posterior pattern specification	6	1	1													1	1	1	2							212
1955	BP	GO:0009798	axis specification	5	1	1																							96
1956	BP	GO:0009948	anterior/posterior axis specification	6	1	1																							51
1957	BP	GO:0019827	stem cell population maintenance	4	1	2	1	2	1	2	1	1	1	1	1	1			1	3			1	1	1	1	1	1	167
1958	BP	GO:0097150	neuronal stem cell population maintenance	5	1	1																							21
1959	BP	GO:0035019	somatic stem cell population maintenance	5	1	1							1	1															78
1960	BP	GO:0009791	post-embryonic development	4											1	1					1	2							115
1961	BP	GO:0035265	organ growth	4							1	1					1	1	1	1							1	2	146
1962	BP	GO:0098868	bone growth	5													1	1	1	1							1	1	24
1963	BP	GO:0003416	endochondral bone growth	6													1	1	1	1							1	1	22
1964	BP	GO:0003417	growth plate cartilage development	7													1	1	1	1							1	1	16
1965	BP	GO:0060419	heart growth	5							1	1															1	1	67
1966	BP	GO:0055017	cardiac muscle tissue growth	6							1	1															1	1	59
1967	BP	GO:0003301	physiological cardiac muscle hypertrophy	7																							1	1	17
1968	BP	GO:0061049	cell growth involved in cardiac muscle cell development	8																							1	1	17
1969	BP	GO:0060038	cardiac muscle cell proliferation	7							1	1																	39
1970	BP	GO:0035264	multicellular organism growth	4																	1	2	1	2					164
1971	BP	GO:0002021	response to dietary excess	4																			1	1					23
1972	BP	GO:0001763	morphogenesis of a branching structure	4							1	1			1	1													217
1973	BP	GO:0061138	morphogenesis of a branching epithelium	5							1	1			1	1													202
1974	BP	GO:0048754	branching morphogenesis of an epithelial tube	6							1	1			1	1													167
1975	BP	GO:0001658	branching involved in ureteric bud morphogenesis	7											1	1													61
1976	BP	GO:0050892	intestinal absorption	4																			1	1					33
1977	BP	GO:0098856	intestinal lipid absorption	5																			1	1					14
1978	BP	GO:0030299	intestinal cholesterol absorption	6																			1	1					14
1979	BP	GO:0031424	keratinization	4																					1	1			49
1980	BP	GO:0032504	multicellular organism reproduction	3	1	4	1	1	1	2	1	1	1	1	1	3	1	1	1	1	1	3	1	1	1	1	1	3	823
1981	BP	GO:0065007	biological regulation	2	5.08e-17	45	5.52e-11	33	3.27e-09	32	8.62e-11	39	8.12e-08	30	8.62e-11	39	7.95e-11	37	7.47e-15	42	4.27e-06	29	4.65e-09	33	7.21e-10	39	1.34e-09	32	11489
1982	BP	GO:0065008	regulation of biological quality	3	1	11	1	6	1	10	1	7	0.00102	14	1	9	0.0101	14	0.00272	15	1	8	0.00298	14	1	8	0.00102	14	3631
1983	BP	GO:0090066	regulation of anatomical structure size	4							1	1			1	1			1	1			1	2	1	2			484
1984	BP	GO:0035150	regulation of tube size	5							1	1			1	1													152
1985	BP	GO:0050880	regulation of blood vessel size	6							1	1			1	1													151
1986	BP	GO:0042311	vasodilation	7							1	1			1	1													74
1987	BP	GO:0051235	maintenance of location	4									1	2	1	2			1	2	1	1	1	1			1	1	286
1988	BP	GO:0051238	sequestering of metal ion	5									1	1															119
1989	BP	GO:0019915	lipid storage	5									1	1	1	1													62
1990	BP	GO:0045185	maintenance of protein location	5											1	1			1	2	1	1	1	1			1	1	96
1991	BP	GO:0051651	maintenance of location in cell	5									1	1	1	1			1	2	1	1	1	1			1	1	102
1992	BP	GO:0032507	maintenance of protein location in cell	6											1	1			1	2	1	1	1	1			1	1	89
1993	BP	GO:0072595	maintenance of protein localization in organelle	7											1	1			1	1									30
1994	BP	GO:0051220	cytoplasmic sequestering of protein	7											1	1			1	1									45
1995	BP	GO:0072656	maintenance of protein location in mitochondrion	8											1	1			1	1									5
1996	BP	GO:0045053	protein retention in Golgi apparatus	7															1	1									2
1997	BP	GO:0050803	regulation of synapse structure or activity	4							1	1							1	1	1	1			1	1			238
1998	BP	GO:0031647	regulation of protein stability	4							1	1	1	2			1	2	1	1	1	1					1	3	213
[truncated: 3,978 more rows]

## Sheet: C. 2nd-Z-15% GO
#	Term Type	Term ID	Term Name	Term Depth	Imp-β		Trn-1		Trn-2		Trn-SR		Imp-4		Imp-5		Imp-7		Imp-8		Imp-9		Imp-11		Imp-13		Exp-4		Total No.
					p-value	# in 303	p-value	# in 247	p-value	# in 246	p-value	# in 302	p-value	# in 244	p-value	# in 300	p-value	# in 284	p-value	# in 289	p-value	# in 253	p-value	# in 250	p-value	# in 309	p-value	# in 262
1	BP	GO:0008150	biological_process	1	7.51e-141	289	5.32e-121	240	6.6e-120	238	9.12e-140	287	2.23e-115	235	9.94e-143	290	1.04e-133	271	1.33e-143	281	7.22e-126	246	9.81e-122	244	3.62e-148	300	9.22e-128	255	16994
2	BP	GO:0000003	reproduction	2	1	17	0.0588	18	1	14	0.000322	24	1	13	1	17	0.0066	21	1	16	1	12	1	11	1	13	1	11	1403
3	BP	GO:0071840	cellular component organization or biogenesis	2	2.8e-68	155	3.88e-45	116	6.16e-57	128	3.64e-61	147	3.45e-57	128	2.21e-65	152	7.07e-64	145	3.25e-80	163	4.04e-87	158	4.13e-54	127	1.47e-67	157	2.91e-74	150	6327
4	BP	GO:0044085	cellular component biogenesis	3	2.1e-35	79	1.19e-29	66	5.67e-29	65	9.95e-35	78	5.58e-30	66	3.14e-37	81	1.38e-41	83	1.05e-51	94	4.2e-61	97	7.55e-32	69	2.09e-33	78	3.32e-35	74	2671
5	BP	GO:0070271	protein complex biogenesis	4	1.02e-08	31	4.39e-15	36	1.96e-06	25	2.57e-13	37	2.06e-09	29	1.95e-12	36	9.62e-12	34	9.35e-06	26	8.14e-15	36	1.75e-17	39	2.47e-14	39	1.17e-08	29	1400
6	BP	GO:0070272	proton-transporting ATP synthase complex biogenesis	5					1	1																			4
7	BP	GO:0097034	mitochondrial respiratory chain complex IV biogenesis	5					1	1													1	1	1	1			11
8	BP	GO:0097031	mitochondrial respiratory chain complex I biogenesis	5	1	2	1	1	1	2			1	2			1	1									1	1	63
9	BP	GO:0044091	membrane biogenesis	4			1	2																					33
10	BP	GO:0022613	ribonucleoprotein complex biogenesis	4	5.06e-37	40	8.21e-12	19	9.47e-29	32	2.05e-27	33	1.36e-24	29	2.56e-27	33	1.22e-29	34	7.91e-58	53	2.09e-54	49	5.16e-14	21	3.7e-10	19	1.9e-33	36	382
11	BP	GO:0042254	ribosome biogenesis	5	3.09e-18	22	1.21e-05	11	8.68e-16	19	1.13e-19	23	1.77e-10	15	1.45e-15	20	1.02e-09	15	2.58e-24	26	9.44e-26	26	1.04e-06	12	0.451	7	6.48e-14	18	235
12	BP	GO:0042274	ribosomal small subunit biogenesis	5	1	3	1	1			1	1			1	1	1	2	0.19	4	1	3	1	1					49
13	BP	GO:0042273	ribosomal large subunit biogenesis	5	1	3	1	2	1	2	0.000139	6	1	1	1	3	0.000109	6	3.13e-17	13	5.72e-12	10	0.0859	4			0.0963	4	43
14	BP	GO:0048511	rhythmic process	2	1	7	1	5	6.34e-05	12	1	5	0.274	8	1	3	1	7	0.102	9	1	7	1	5	1	7	1	7	347
15	BP	GO:0007623	circadian rhythm	3	1	5	1	3	0.000682	9	1	3	0.00801	8	1	1	0.144	7	0.0189	8	1	5	1	4	1	4	0.11	7	212
16	BP	GO:0008152	metabolic process	2	6.98e-131	257	6.5e-94	201	3.51e-103	207	1.79e-125	252	1.42e-94	200	6.52e-104	236	1.08e-112	233	8.48e-120	242	1.61e-133	231	1.65e-82	194	1.37e-107	244	6.24e-125	232	12055
17	BP	GO:0044238	primary metabolic process	3	8.66e-119	237	1.14e-78	179	1.96e-96	193	6.1e-115	233	2.54e-88	186	8.94e-92	214	6.3e-108	219	1.98e-116	229	5.1e-134	223	9.81e-81	183	9.52e-95	221	5.07e-118	218	10482
18	BP	GO:0006807	nitrogen compound metabolic process	3	1.26e-120	208	1.14e-64	141	2.34e-97	169	2.71e-103	193	5.75e-88	161	1.88e-71	164	7.98e-99	183	8.02e-118	201	2.53e-127	194	3.49e-66	144	1.46e-69	165	2.08e-105	182	6922
19	BP	GO:0097164	ammonium ion metabolic process	4	1	2	0.0308	7	1	2	1	4			1	1			1	1	1	2	1	3	1	4	1	1	182
20	BP	GO:0071941	nitrogen cycle metabolic process	4											1	1													17
21	BP	GO:2001057	reactive nitrogen species metabolic process	4	1	1			1	2	1	2							1	2	1	1							87
22	BP	GO:0032259	methylation	3	1.18e-09	18	1	7	0.00103	11	0.00496	11	0.403	8	1	6	0.0215	10	1	5	0.01	10	1	7	0.0454	10	0.567	8	367
23	BP	GO:0009056	catabolic process	3	7.18e-09	40	7.03e-11	39	8.68e-06	31	3.18e-10	42	1.78e-12	41	1.83e-13	47	4.05e-16	49	1.6e-31	68	5.46e-25	57	8.5e-20	51	1.15e-18	55	2.93e-22	55	2256
24	BP	GO:0071704	organic substance metabolic process	3	7.43e-121	241	3.15e-83	185	3.04e-95	194	1.02e-115	236	8.02e-91	190	8.21e-97	221	1.99e-111	224	5.2e-124	237	3.05e-139	228	8.02e-82	186	1.09e-99	228	3.13e-122	223	10808
25	BP	GO:1902224	ketone body metabolic process	4	1	1									1	1	1	1	1	2	1	1			1	1	1	1	11
26	BP	GO:1901615	organic hydroxy compound metabolic process	4	1	5	0.00026	14	1	3	1	7	1	3	1	5	1	5	1	5	1	8	1	7	1	10	1	6	559
27	BP	GO:1900673	olefin metabolic process	4																	1	1							2
28	BP	GO:1901135	carbohydrate derivative metabolic process	4	0.42	18	0.000811	21	1	14	0.000932	23	1	15	8.36e-07	28	0.0627	19	1	12	1	10	0.0043	20	3.23e-05	26	0.099	18	1381
29	BP	GO:0006040	amino sugar metabolic process	5	1	3	1	1			1	1	1	2	1	1									1	3			41
30	BP	GO:0006050	mannosamine metabolic process	6																					1	1			2
31	BP	GO:0006051	N-acetylmannosamine metabolic process	7																					1	1			2
32	BP	GO:1901071	glucosamine-containing compound metabolic process	6	1	2	1	1																	1	2			27
33	BP	GO:0006041	glucosamine metabolic process	7	0.482	2	1	1																	1	1			5
34	BP	GO:0006044	N-acetylglucosamine metabolic process	7	1	1																			1	2			18
35	BP	GO:0043170	macromolecule metabolic process	4	3.83e-101	213	1.44e-64	158	8.46e-84	175	2.72e-95	207	2.96e-84	175	1.25e-79	193	1.33e-95	200	3.32e-111	216	5.44e-121	207	8.21e-70	165	6.31e-78	195	8.46e-105	200	9286
36	BP	GO:0010467	gene expression	5	4.2e-94	170	6.1e-57	121	1.44e-93	153	8.76e-86	162	1.87e-79	141	1.09e-60	138	9.6e-100	169	2.1e-114	183	1.99e-129	182	9.49e-54	119	3.89e-52	131	7.92e-103	166	5430
37	BP	GO:0043412	macromolecule modification	5	6.57e-18	72	2.42e-09	51	1.21e-10	53	1.96e-21	77	6.68e-12	55	7.3e-12	62	9.09e-08	52	0.00228	43	6.9e-06	45	1.82e-08	50	1.32e-19	76	9.27e-07	48	4139
38	BP	GO:0098732	macromolecule deacylation	6	1	3	1	1	1	2	1	1	1	2			1	2	1	2	1	1	1	3	0.176	5	1	3	87
39	BP	GO:0019538	protein metabolic process	5	7.41e-18	86	2.45e-24	86	6.78e-16	73	1.02e-25	98	3.71e-14	70	1.26e-38	116	5.92e-24	92	4.43e-36	110	4.48e-25	88	1.88e-33	99	2.79e-43	124	5.97e-25	90	5770
40	BP	GO:0006508	proteolysis	6	0.00513	24	0.401	18	0.115	19	0.387	20	0.116	19	0.0511	22	0.000474	25	0.254	20	1	12	0.00411	22	0.0282	23	0.0079	22	1632
41	BP	GO:0033619	membrane protein proteolysis	7	1	1	1	1	1	2	1	1	1	1	1	3	1	1	1	2	1	2	1	2	1	1	1	3	55
42	BP	GO:0006509	membrane protein ectodomain proteolysis	8	1	1	1	1	1	2			1	1	1	3	1	1	1	2	1	2	1	2	1	1	1	3	39
43	BP	GO:0031293	membrane protein intracellular domain proteolysis	8							1	1																	15
44	BP	GO:0042107	cytokine metabolic process	6			1	1	1	1	1	1			1	1			1	1			1	1	1	2	1	1	115
45	BP	GO:0050755	chemokine metabolic process	7											1	1							1	1					15
46	BP	GO:0042157	lipoprotein metabolic process	6			1	1							1	1							1	1	1	1			134
47	BP	GO:0042982	amyloid precursor protein metabolic process	6									1	1	1	1	1	1	1	1					1	1			31
48	BP	GO:0042987	amyloid precursor protein catabolic process	7									1	1	1	1	1	1	1	1									21
49	BP	GO:0036211	protein modification process	6	3.61e-12	61	2.8e-07	46	1.7e-08	48	3.48e-19	72	1.93e-07	46	4.87e-11	59	5.69e-06	47	0.0111	40	5.16e-05	42	4.61e-08	48	9.11e-19	73	0.000479	41	3959
50	BP	GO:0051604	protein maturation	6	0.84	8	1	5	1	6	1	5	1	3	1	5	1	7	1	5	1	5	1	4	1	4	0.445	8	354
51	BP	GO:0016485	protein processing	7	0.506	8	1	5	1	6	1	4	1	3	1	4	1	6	1	5	1	5	1	3	1	4	1	7	328
52	BP	GO:1900756	protein processing in phagocytic vesicle	8			0.048	2							1	1							1	1	1	1	1	1	2
53	BP	GO:0016540	protein autoprocessing	8																	1	1					1	1	11
54	BP	GO:0031638	zymogen activation	8	1	2	1	1	1	4	1	1	1	3	1	1	1	3	1	2	1	2	1	1	1	2	1	2	124
55	BP	GO:0031639	plasminogen activation	9					1	1									1	1							1	1	20
56	BP	GO:1901575	organic substance catabolic process	4	1.04e-05	31	8.77e-10	34	0.0019	24	1.58e-09	37	3.4e-09	33	1.94e-09	37	5.13e-11	38	1.67e-22	53	3.51e-18	45	1.13e-15	42	7.31e-17	48	7.71e-21	49	1864
57	BP	GO:1901136	carbohydrate derivative catabolic process	5	1	2	1	3	1	1	1	4	1	1	1	1	1	1			1	1	1	2	1	3	1	2	182
58	BP	GO:0046348	amino sugar catabolic process	6																					1	2			13
59	BP	GO:1901072	glucosamine-containing compound catabolic process	7																					1	1			9
60	BP	GO:0006043	glucosamine catabolic process	8																					1	1			1
61	BP	GO:1901616	organic hydroxy compound catabolic process	5			1	2	1	1	1	1									1	1	1	1	1	2	1	1	72
62	BP	GO:0009057	macromolecule catabolic process	5	0.0209	19	0.00166	19	0.000324	20	0.000332	22	3.03e-10	28	8.96e-07	26	1.26e-09	29	1.55e-21	43	3.24e-14	33	2.49e-13	32	3.17e-13	35	3.62e-19	39	1199
63	BP	GO:0030163	protein catabolic process	6	1	11	1	11	1	9	0.0362	15	0.000917	16	0.154	14	0.327	13	1	8	1	5	0.00638	15	0.0141	16	0.0463	14	827
64	BP	GO:1901564	organonitrogen compound metabolic process	4	1.5e-10	43	2.98e-18	49	4.22e-08	35	1.2e-12	46	1.18e-05	31	2.96e-27	65	6.31e-19	53	1.01e-44	82	4.85e-22	54	6.64e-23	55	1.06e-24	63	1.19e-18	51	2290
65	BP	GO:1901160	primary amino compound metabolic process	5							1	1																	16
66	BP	GO:1901565	organonitrogen compound catabolic process	5	1	7	1	6	1	1	0.00435	11	1	2	1	6	1	3	1	3	1	6	1	6	0.233	9	1	7	362
67	BP	GO:0006022	aminoglycan metabolic process	5	1	4			1	1	1	2	1	1	1	1	1	1	1	1	1	1	1	1	1	1	1	3	180
68	BP	GO:0006026	aminoglycan catabolic process	6	1	2			1	1	1	1	1	1			1	1			1	1	1	1			1	2	69
69	BP	GO:0030203	glycosaminoglycan metabolic process	6	1	4			1	1	1	2	1	1	1	1	1	1	1	1	1	1	1	1	1	1	1	3	172
70	BP	GO:1903510	mucopolysaccharide metabolic process	7	1	4			1	1	1	2	1	1	1	1	1	1	1	1	1	1	1	1	1	1	1	3	130
71	BP	GO:0030212	hyaluronan metabolic process	8	1	3			1	1	1	2	1	1	1	1	1	1	1	1	1	1	1	1	1	1	1	3	38
72	BP	GO:0006027	glycosaminoglycan catabolic process	7	1	2			1	1	1	1	1	1			1	1			1	1	1	1			1	2	63
73	BP	GO:0009308	amine metabolic process	5	1	3	1	5	1	2	1	4	1	1	1	3	1	1	1	1	1	1	1	3	1	4	1	1	239
74	BP	GO:0009310	amine catabolic process	6																			1	1					17
75	BP	GO:0009820	alkaloid metabolic process	5	1	1											1	1							1	1			11
76	BP	GO:0009812	flavonoid metabolic process	4															1	1									28
77	BP	GO:1901360	organic cyclic compound metabolic process	4	3.27e-113	194	7.16e-59	129	8.44e-92	158	4.25e-95	178	2.02e-81	149	2.42e-52	136	3.69e-98	175	6.87e-98	177	8.07e-130	189	1.61e-61	133	7.36e-61	148	1.53e-95	167	6143
78	BP	GO:1901361	organic cyclic compound catabolic process	5	1	9	0.00255	12	0.0932	10	0.0678	11	0.0158	11	0.000372	14	3.22e-06	16	6.4e-31	38	1.67e-22	30	8.23e-10	19	2.9e-12	23	5.33e-16	25	486
79	BP	GO:0005975	carbohydrate metabolic process	4	0.000486	20	0.00338	17	0.226	14	2e-05	22	0.23	14	2.26e-05	22	0.015	17	1	13	0.0753	15	1	11	4.09e-05	22	6.96e-05	20	1020
80	BP	GO:0005976	polysaccharide metabolic process	5	1	1	1	4			1	3	1	2	1	2			1	1			1	2			1	1	117
81	BP	GO:0044042	glucan metabolic process	6			1	4			1	2	1	2	1	1							1	2					87
82	BP	GO:0016052	carbohydrate catabolic process	5	1	2	1	3			1	3	1	4	1	3	1	1	1	2			1	3	1	3	1	2	146
83	BP	GO:0000272	polysaccharide catabolic process	6			1	1			1	1	1	2															32
84	BP	GO:0009251	glucan catabolic process	7			1	1			1	1	1	2															30
85	BP	GO:0009058	biosynthetic process	3	1.84e-56	143	4.22e-51	123	1.85e-55	127	2.06e-63	150	2.83e-46	117	4.9e-52	138	1.77e-59	141	2.51e-65	149	1.45e-66	140	3.75e-40	112	4.71e-55	144	9.99e-53	129	6390
86	BP	GO:1901576	organic substance biosynthetic process	4	3.39e-57	143	8.47e-51	122	3.98e-56	127	2.66e-62	148	7.08e-47	117	7.27e-52	137	3.26e-60	141	4.13e-66	149	2.87e-66	139	3.42e-38	109	6.61e-55	143	1.82e-52	128	6305
87	BP	GO:1901617	organic hydroxy compound biosynthetic process	5	1	3	0.0015	9	1	2	1	5	1	3	1	2	1	4	1	3	1	4	1	3	1	4	1	2	231
88	BP	GO:1901362	organic cyclic compound biosynthetic process	5	1.59e-48	115	8.25e-29	82	5.2e-44	99	7.84e-42	107	1.51e-39	94	5.91e-21	80	6.41e-44	106	1.9e-38	101	2.46e-57	114	6.36e-29	83	4.48e-26	89	9.44e-41	99	4506
89	BP	GO:1901566	organonitrogen compound biosynthetic process	5	4.6e-07	29	5.28e-13	34	6.81e-07	26	6.41e-10	33	0.00137	21	7.05e-27	53	5.12e-18	42	1.64e-49	73	1.03e-21	44	8.1e-20	42	1.21e-20	47	2.71e-17	40	1439
90	BP	GO:0009059	macromolecule biosynthetic process	5	4.9e-51	126	7.02e-43	105	9.01e-52	114	3.06e-53	128	1.8e-43	105	8.58e-46	120	1.57e-50	121	1.99e-57	130	4.4e-61	125	2.21e-33	95	4.22e-49	126	8.14e-48	114	5283
91	BP	GO:0045341	MHC class I biosynthetic process	6																			1	1	1	1			7
92	BP	GO:0045342	MHC class II biosynthetic process	6					1	1																			14
93	BP	GO:1901137	carbohydrate derivative biosynthetic process	5	1	9	1	9	1	9	0.0879	15	1	8	2.1e-06	22	1	12	1	9	1	6	1	11	0.137	15	1	11	894
94	BP	GO:0046349	amino sugar biosynthetic process	6	0.0131	3	1	1			1	1	1	1	1	1									1	1			8
95	BP	GO:1901073	glucosamine-containing compound biosynthetic process	7			1	1																					3
96	BP	GO:0006042	glucosamine biosynthetic process	8			1	1																					1
97	BP	GO:0042983	amyloid precursor protein biosynthetic process	4																					1	1			7
98	BP	GO:0022610	biological adhesion	2	1	11	0.00214	21	1	12	1	12	1	8	0.304	19	1	17	1	13	1	12	0.000707	22	0.0534	21	1	13	1467
99	BP	GO:0007155	cell adhesion	3	1	11	0.00201	21	1	12	1	12	1	8	0.289	19	1	17	1	13	1	12	0.00066	22	0.0503	21	1	13	1461
100	BP	GO:0033627	cell adhesion mediated by integrin	4									1	2			1	1	1	1	1	1							52
101	BP	GO:0031589	cell-substrate adhesion	4	1	3	0.0172	9	1	4	1	1	1	3	0.0567	9	1	4	1	6	1	3	0.0191	9	0.00018	12	1	3	311
102	BP	GO:0007160	cell-matrix adhesion	5	1	2	1	5	1	3	1	1	1	3	1	4	1	1	1	3	1	2	1	5	0.172	7	1	3	201
103	BP	GO:0007161	calcium-independent cell-matrix adhesion	6									1	1					1	1	1	1							4
104	BP	GO:0098609	cell-cell adhesion	4	1	6	1	12	1	6	1	7	1	5	1	11	0.784	13	1	9	1	9	1	11	1	11	1	10	906
105	BP	GO:0098742	cell-cell adhesion via plasma-membrane adhesion molecules	5	1	1					1	1	1	1			1	2	1	2	1	1					1	1	222
106	BP	GO:0007156	homophilic cell adhesion via plasma membrane adhesion molecules	6	1	1					1	1	1	1			1	2	1	2	1	1					1	1	156
107	BP	GO:0007157	heterophilic cell-cell adhesion via plasma membrane cell adhesion molecules	6													1	1											50
108	BP	GO:0001906	cell killing	2			1	3	1	1			1	1	1	2					1	1			1	2			111
109	BP	GO:0040011	locomotion	2	0.83	21	3.54e-05	27	1	8	1	19	1	17	0.00141	27	1	18	1	18	1	15	0.000752	25	5.28e-06	32	1	19	1853
110	BP	GO:0032502	developmental process	2	1.91e-19	90	1.45e-36	103	1.11e-21	83	7.2e-18	87	2.25e-12	68	1.14e-20	92	8.89e-26	96	3.4e-22	92	6.7e-14	72	1.68e-23	87	6.64e-24	99	9.24e-19	82	5934
111	BP	GO:0031128	developmental induction	3	1	1							1	1			1	1			1	1	1	1			1	1	35
112	BP	GO:0098727	maintenance of cell number	3	0.00475	8	0.000111	9	0.00148	8	0.000387	9	1	4	1	4	1	4	1	4	0.227	6	1	3	0.0598	7	1	5	170
113	BP	GO:0048856	anatomical structure development	3	2.5e-13	74	4.03e-35	96	2.65e-14	67	4.71e-14	75	1.07e-07	55	3.71e-16	79	2.28e-19	81	3.45e-16	77	8.81e-11	62	1.77e-23	82	7.54e-24	93	3.34e-13	68	5272
114	BP	GO:1904888	cranial skeletal system development	4					1	1	1	2					1	1					1	1					55
115	BP	GO:0060021	palate development	4					1	1	1	1	1	1							1	1					1	1	85
116	BP	GO:0009888	tissue development	4	0.225	22	3.68e-10	34	0.004	23	0.0248	24	1	12	0.0278	24	0.0308	23	0.000109	28	1	18	0.00614	23	4.58e-10	38	0.012	23	1807
117	BP	GO:0007498	mesoderm development	5			1	1	1	2			1	1			1	2	1	2	1	1			1	1			128
118	BP	GO:0048318	axial mesoderm development	6													1	1	1	1									8
119	BP	GO:0061448	connective tissue development	5	1	4	1	1	1	4	1	2	1	2	1	3	1	4	1	5	1	3	1	2	1	2	1	4	245
120	BP	GO:0060429	epithelium development	5	1	11	2.64e-05	21	0.621	14	1	11	1	4	1	14	0.611	15	1	12	1	12	0.783	14	5.13e-05	23	0.344	15	1125
121	BP	GO:0003158	endothelium development	6	1	2	1	1	1	1	1	1			1	2	1	2	1	2	1	2	1	2	1	2	1	2	115
122	BP	GO:0008544	epidermis development	6	1	3	1	7	1	4	1	4	1	1	1	3	1	4	1	2	1	4	1	4	1	7	1	3	318
123	BP	GO:0060537	muscle tissue development	5	0.182	9	0.376	8	1	4	0.931	8	1	7	1	6	1	6	1	7	1	6	1	6	0.00636	11	1	4	362
124	BP	GO:0014706	striated muscle tissue development	6	0.135	9	0.287	8	1	4	0.718	8	1	7	1	6	1	6	1	7	1	6	1	6	0.00436	11	1	4	348
125	BP	GO:0007398	ectoderm development	5			1	1															1	1	1	1			24
126	BP	GO:0007492	endoderm development	5	1	1	1	1	1	1	1	4	1	1	1	1	1	1	1	2	1	1	1	1			1	3	80
127	BP	GO:0009653	anatomical structure morphogenesis	3	1	26	1.63e-12	46	0.0103	29	0.000339	36	1	23	1.41e-05	39	0.00214	33	0.0259	31	1	23	1.61e-11	45	2.55e-08	45	0.0369	29	2805
128	BP	GO:0048646	anatomical structure formation involved in morphogenesis	3	1	10	0.0928	16	1	10	1	13	1	8	1	14	1	12	1	11	1	10	0.000397	20	0.907	16	1	13	1184
129	BP	GO:0002376	immune system process	2	1.11e-06	40	1.32e-08	39	0.0004	31	3.1e-06	39	3.32e-05	33	9.77e-11	47	5.6e-07	39	1.12e-06	39	0.000716	31	6.61e-05	33	0.000285	36	5.4e-05	34	2673
130	BP	GO:0002252	immune effector process	3	0.103	14	0.0033	15	1	10	0.366	13	1	8	4.8e-05	19	0.225	13	1	12	1	8	1	11	0.00877	16	1	9	796
131	BP	GO:0002443	leukocyte mediated immunity	4	1	5	1	5	1	3	1	3	1	4	1	4	1	4	1	1	1	3			1	4	1	4	311
132	BP	GO:0002449	lymphocyte mediated immunity	5	1	4	1	5	1	3	1	2	1	4	1	4	1	4	1	1	1	3			1	2	1	3	240
133	BP	GO:0002444	myeloid leukocyte mediated immunity	5	1	1					1	1													1	2	1	1	76
134	BP	GO:0002446	neutrophil mediated immunity	6							1	1																	29
135	BP	GO:0002448	mast cell mediated immunity	6	1	1																			1	2	1	1	44
136	BP	GO:0001909	leukocyte mediated cytotoxicity	5			1	3	1	1			1	1	1	2					1	1			1	2			86
137	BP	GO:0002440	production of molecular mediator of immune response	3	0.3	6	1	5	0.142	6	1	4	1	2	1	2	1	5	1	1	1	3					1	3	159
138	BP	GO:0002377	immunoglobulin production	4	0.197	5	1	3	0.109	5	1	4	1	2	1	2	1	3	1	1	1	1					1	2	92
139	BP	GO:0002378	immunoglobulin biosynthetic process	5	1	1	1	1	1	1	1	1					1	1											3
140	BP	GO:0019882	antigen processing and presentation	3	1	4	1	6	1	6	1	6	1	4	1	6	1	5	0.0477	8	1	2	1	5	1	4	0.03	8	241
141	BP	GO:0002475	antigen processing and presentation via MHC class Ib	4			1	1	1	1											1	1					1	1	16
142	BP	GO:0048003	antigen processing and presentation of lipid antigen via MHC class Ib	5																							1	1	7
143	BP	GO:0002468	dendritic cell antigen processing and presentation	4					1	1									1	1							1	1	8
144	BP	GO:0002504	antigen processing and presentation of peptide or polysaccharide antigen via MHC class II	4	1	3	1	4	1	3	0.27	5	1	2	1	4	1	3	0.247	5	1	1	1	3	1	4	0.0128	6	99
145	BP	GO:0048002	antigen processing and presentation of peptide antigen	4	1	4	0.443	6	1	3	1	5	1	2	1	4	1	3	1	4	1	2	1	4	1	4	1	5	194
146	BP	GO:0002428	antigen processing and presentation of peptide antigen via MHC class Ib	5			1	1	1	1											1	1							9
147	BP	GO:0002474	antigen processing and presentation of peptide antigen via MHC class I	5	1	1	1	2	1	1	1	1	1	1	1	2	1	1			1	1	1	2	1	1	1	1	107
148	BP	GO:0002495	antigen processing and presentation of peptide antigen via MHC class II	5	1	3	1	4	1	2	0.234	5	1	2	1	4	1	3	1	4	1	1	1	3	1	4	0.168	5	96
149	BP	GO:0019883	antigen processing and presentation of endogenous antigen	4			1	1	1	1											1	1							18
150	BP	GO:0002483	antigen processing and presentation of endogenous peptide antigen	5			1	1	1	1											1	1							16
151	BP	GO:0019885	antigen processing and presentation of endogenous peptide antigen via MHC class I	6			1	1	1	1											1	1							15
152	BP	GO:0019884	antigen processing and presentation of exogenous antigen	4	1	4	0.303	6	1	3	1	5	1	2	1	4	1	3	1	4	1	2	1	3	1	4	0.383	6	181
153	BP	GO:0002478	antigen processing and presentation of exogenous peptide antigen	5	1	4	0.244	6	1	3	1	5	1	2	1	4	1	3	1	4	1	2	1	3	1	4	1	5	174
154	BP	GO:0002477	antigen processing and presentation of exogenous peptide antigen via MHC class Ib	6			1	1	1	1											1	1							8
155	BP	GO:0002481	antigen processing and presentation of exogenous protein antigen via MHC class Ib, TAP-dependent	7			1	1	1	1											1	1							8
156	BP	GO:0042590	antigen processing and presentation of exogenous peptide antigen via MHC class I	6	1	1	1	2	1	1											1	1							80
157	BP	GO:0002480	antigen processing and presentation of exogenous peptide antigen via MHC class I, TAP-independent	7			1	1	1	1											1	1							9
158	BP	GO:0002479	antigen processing and presentation of exogenous peptide antigen via MHC class I, TAP-dependent	7	1	1	1	2	1	1											1	1							76
159	BP	GO:0019886	antigen processing and presentation of exogenous peptide antigen via MHC class II	6	1	3	1	4	1	2	0.191	5	1	2	1	4	1	3	1	4	1	1	1	3	1	4	0.137	5	92
160	BP	GO:0048007	antigen processing and presentation, exogenous lipid antigen via MHC class Ib	5																							1	1	7
161	BP	GO:0050896	response to stimulus	2	2.66e-26	122	1.05e-45	133	1.07e-22	102	1.62e-37	138	1.01e-29	112	4.81e-40	142	5.01e-29	121	7.2e-26	118	1.65e-18	97	7.48e-38	125	1.14e-44	151	7.26e-20	102	8574
162	BP	GO:0042221	response to chemical	3	8.38e-17	73	1.16e-18	68	2.42e-12	58	1.5e-14	69	2.84e-14	61	8.37e-14	68	3.27e-14	66	4.56e-16	70	8.89e-12	58	7.69e-19	69	1.12e-19	79	3.26e-08	53	4445
163	BP	GO:1901700	response to oxygen-containing compound	4	1.14e-05	29	3.52e-06	27	1.33e-05	26	1.28e-09	35	0.0443	20	0.000598	26	1.11e-05	28	1.84e-05	28	2.27e-05	26	0.199	19	0.00112	26	0.0346	21	1660
164	BP	GO:1901698	response to nitrogen compound	4	0.000308	21	0.0331	16	0.0299	16	0.000275	21	1	8	0.072	17	0.034	17	0.0446	17	1	12	1	9	1	15	0.0645	16	1087
165	BP	GO:0060359	response to ammonium ion	5	1	1	1	1	1	3	1	2					1	1	1	1	1	2	1	2	1	2	1	2	97
166	BP	GO:0001101	response to acid chemical	4	1	3	0.207	8	1	6	0.525	8	1	3	1	2	1	5	1	5	1	4	1	5	1	7	1	3	332
167	BP	GO:1990267	response to transition metal nanoparticle	4			1	4	1	3	0.261	6	1	3	1	3			1	3	1	3	1	2	1	3	1	2	156
168	BP	GO:0072718	response to cisplatin	5					1	1									1	1									6
169	BP	GO:1902074	response to salt	4			1	1	1	1																			15
170	BP	GO:0009410	response to xenobiotic stimulus	4	1	3	1	5	1	2	1	4			1	2	1	1	1	1	1	3	1	5	1	5	1	4	202
171	BP	GO:0009636	response to toxic substance	4	1	4	1	2	1	3	1	5	1	3	1	5	1	3	1	6	1	6	1	2	1	3	1	2	255
172	BP	GO:0017085	response to insecticide	5							1	1																	12
173	BP	GO:0060992	response to fungicide	5											1	1													12
174	BP	GO:0046677	response to antibiotic	5			1	1	1	1	1	1			1	2	1	1	1	1									48
175	BP	GO:0010035	response to inorganic substance	4	0.13	11	1.83e-07	17	0.161	10	0.0243	12	1	6	0.13	11	1	6	1	9	0.0352	11	0.193	10	0.173	11	1	9	519
176	BP	GO:0010269	response to selenium ion	5	1	1			1	1	1	1							1	1	1	1			1	1			8
177	BP	GO:0072714	response to selenite ion	5							1	1											1	1					2
178	BP	GO:0010038	response to metal ion	5	1	5	7.38e-06	13	1	7	0.731	8	1	3	0.765	8	1	3	1	5	1	5	1	7	0.95	8	1	6	349
179	BP	GO:0010288	response to lead ion	6					1	1	1	1			1	1									1	1			20
180	BP	GO:0032025	response to cobalt ion	6			1	2	1	1					1	1			1	1					1	1	1	1	12
181	BP	GO:0032026	response to magnesium ion	6					1	1									1	1							1	1	22
182	BP	GO:0010044	response to aluminum ion	6	1	1											1	1	1	1	1	1					1	1	6
183	BP	GO:0051592	response to calcium ion	6	1	4	0.00194	7	1	3	1	1			1	4	1	2	1	1			1	4	1	3	1	1	120
184	BP	GO:0035864	response to potassium ion	6																	1	1							14
185	BP	GO:0046686	response to cadmium ion	6			0.101	4	1	2	1	3			1	1			1	1	1	2	1	1	1	3	1	1	45
186	BP	GO:0010226	response to lithium ion	6			1	1			1	1																	29
187	BP	GO:0046688	response to copper ion	6			1	1			1	2	1	2	1	1			1	1	1	1	1	2	1	2	1	1	32
188	BP	GO:0046689	response to mercury ion	6																							1	1	16
189	BP	GO:0010043	response to zinc ion	6			1	1	1	1	1	1			1	2			1	1	1	1							57
190	BP	GO:0010042	response to manganese ion	6					1	1	1	1	1	1					1	2	1	2	1	1			1	1	18
191	BP	GO:0010039	response to iron ion	6			1	1	1	1	1	2	1	2					1	1	1	2	1	1	1	1	1	1	36
192	BP	GO:0010041	response to iron(III) ion	7							1	1																	3
193	BP	GO:0010040	response to iron(II) ion	7									1	1											1	1			7
194	BP	GO:1904383	response to sodium phosphate	5			1	1	1	1																			2
195	BP	GO:0034021	response to silicon dioxide	5					1	1	1	1							1	1	1	1							2
196	BP	GO:0046685	response to arsenic-containing substance	4	1	1									1	1	0.663	3	1	2			1	1					28
197	BP	GO:0010033	response to organic substance	4	1.61e-18	62	9.81e-13	48	3.33e-12	47	5.7e-18	61	2.52e-14	50	6.4e-09	47	9.02e-14	53	5.78e-14	54	2.12e-12	48	2.12e-12	48	4.67e-17	61	3.6e-09	44	3009
198	BP	GO:1901654	response to ketone	5	1	3	1	2	0.241	6	1	3	1	2	1	1	1	4	1	3			1	2			1	3	175
199	BP	GO:0051595	response to methylglyoxal	6			1	1																					3
200	BP	GO:1904587	response to glycoprotein	5			1	1	1	1	1	1									1	1							5
201	BP	GO:0070848	response to growth factor	5	0.649	14	0.463	13	0.109	14	0.00297	18	1	12	1	10	1	8	1	12	1	8	0.14	14	2.33e-06	23	1	7	952
202	BP	GO:0014070	response to organic cyclic compound	5	5.49e-05	20	0.925	12	0.22	13	9.39e-06	21	0.224	13	1	9	1	11	1	12	1	11	0.00328	16	0.00203	18	0.0244	15	890
203	BP	GO:1904567	response to wortmannin	6	1	1			1	1	1	1					1	1									1	1	1
204	BP	GO:0043331	response to dsRNA	6	0.0896	5	1	1	1	1	1	4	1	1	1	1	1	1	1	4	1	2			1	2	1	3	78
205	BP	GO:0043330	response to exogenous dsRNA	7	1	2					1	2	1	1					1	3					1	1	1	2	48
206	BP	GO:0046680	response to DDT	6							1	1																	1
207	BP	GO:0046683	response to organophosphorus	5	1	2	1	1	1	2	1	2	1	1			1	2	1	1	1	3	1	2	1	1	1	3	140
208	BP	GO:0034097	response to cytokine	5	0.000799	18	0.694	12	1	10	0.0144	16	0.163	13	1	12	1	11	1	12	0.201	13	1	9	1	13	1	10	862
209	BP	GO:0036005	response to macrophage colony-stimulating factor	6	1	1					1	1																	10
210	BP	GO:0036015	response to interleukin-3	6			1	1							1	1													7
211	BP	GO:0097012	response to granulocyte macrophage colony-stimulating factor	6															1	1									8
212	BP	GO:0036017	response to erythropoietin	6			1	1							1	1													5
213	BP	GO:0070672	response to interleukin-15	6									1	1			1	1	1	1	1	1					1	1	4
214	BP	GO:0070555	response to interleukin-1	6	1	1	1	2	1	2	1	1	1	2	1	1	1	2	1	3	1	3	1	1	1	2	1	2	119
215	BP	GO:0070669	response to interleukin-2	6	1	2			1	1	1	2					1	1									1	1	9
216	BP	GO:0034612	response to tumor necrosis factor	6	1	2	1	3	1	1	1	4	1	3	1	2							1	2	1	3			283
217	BP	GO:0035455	response to interferon-alpha	6	1	1					1	1																	19
218	BP	GO:0070670	response to interleukin-4	6	1	1					1	1							1	1	1	1	1	2	1	2	1	1	32
219	BP	GO:0070741	response to interleukin-6	6	1	3			1	2	1	3			1	1	1	1	1	1							1	1	32
220	BP	GO:0033993	response to lipid	5	0.27	14	1	10	0.00917	15	2.03e-07	23	1	11	1	5	1	12	0.669	13	0.228	13	0.0122	15	1	9	1	12	873
221	BP	GO:1904629	response to diterpene	6							1	1																	1
222	BP	GO:0032526	response to retinoic acid	6	1	1			1	2	1	2	1	2					1	1	1	1	1	2	1	2	1	1	114
223	BP	GO:0070542	response to fatty acid	6	1	1	1	2	1	1	1	1			1	1	1	3	1	2	1	1	1	1	1	1	1	1	84
224	BP	GO:1901344	response to leptomycin B	7			1	1							1	1													1
225	BP	GO:0045472	response to ether	5			1	2	1	1															1	1			11
226	BP	GO:0014076	response to fluoxetine	6			0.144	2	1	1															1	1			3
227	BP	GO:0097305	response to alcohol	5	1	4	1	7	1	6	1	6	1	6	1	4	1	3	1	5	1	5	1	5	1	5	1	4	380
228	BP	GO:0045471	response to ethanol	6	1	1	0.822	5	1	3	1	2	1	1	1	3	1	2	1	4	1	2			1	3	1	2	140
229	BP	GO:1903416	response to glycoside	5							1	1													1	1			6
230	BP	GO:1904631	response to glucoside	6							1	1																	2
231	BP	GO:0051597	response to methylmercury	5			1	1			1	1																	13
232	BP	GO:0009743	response to carbohydrate	5	1	4	1	2	1	5	1	3	1	3	1	3	1	2	1	5	1	3	1	3	1	3	1	1	227
233	BP	GO:0034285	response to disaccharide	6			1	1																					9
234	BP	GO:0009744	response to sucrose	7			1	1																					9
235	BP	GO:0034284	response to monosaccharide	6	1	4	1	1	1	4	1	2	1	3	1	3	1	2	1	5	1	2	1	3	1	3	1	1	200
236	BP	GO:0009746	response to hexose	7	1	4	1	1	1	3	1	1	1	3	1	3	1	2	1	4	1	1	1	3	1	3	1	1	191
237	BP	GO:0009749	response to glucose	8	1	4	1	1	1	3	1	1	1	3	1	3	1	2	1	4	1	1	1	3	1	3	1	1	186
238	BP	GO:0042493	response to drug	4	1	8	1	7	0.0477	10	0.847	9	1	8	0.889	9	1	8	0.000634	13	0.0574	10	1	7	1	6	1	4	449
239	BP	GO:0036276	response to antidepressant	5					1	1																			7
240	BP	GO:0009719	response to endogenous stimulus	3	0.000455	27	0.0007	24	3.72e-05	26	5.35e-09	35	0.00807	22	0.00509	25	3.3e-05	28	0.00248	25	0.385	19	6.31e-05	26	7.89e-10	37	0.023	22	1747
241	BP	GO:0071495	cellular response to endogenous stimulus	4	0.225	18	0.0242	18	0.00133	20	0.000384	23	0.00133	20	0.225	18	1	16	0.434	17	1	12	0.000466	21	8.7e-10	32	1	14	1312
242	BP	GO:0071772	response to BMP	4	1	1	1	2	1	1					1	1	1	1	1	1	1	1			1	3			156
243	BP	GO:0009725	response to hormone	4	0.00478	19	0.121	15	0.0276	16	2.34e-06	24	1	13	0.227	16	0.000447	20	0.000636	20	0.0371	16	0.143	15	0.0286	18	0.0597	16	1080
244	BP	GO:0034694	response to prostaglandin	5			1	1	1	1							1	3	1	2	1	1			1	1			36
245	BP	GO:0071798	response to prostaglandin D	6			1	1																	1	1			6
246	BP	GO:0034696	response to prostaglandin F	6													1	1	1	1	1	1							3
247	BP	GO:0034695	response to prostaglandin E	6					1	1							1	2	1	1									26
248	BP	GO:0009753	response to jasmonic acid	5			0.476	2													1	1	1	1	0.515	2			5
249	BP	GO:0009737	response to abscisic acid	5							1	1											1	1					1
250	BP	GO:0034698	response to gonadotropin	5									1	1					1	2	1	1			1	1			30
251	BP	GO:0032354	response to follicle-stimulating hormone	6															1	1					1	1			12
252	BP	GO:0071107	response to parathyroid hormone	5					1	1							1	1											12
253	BP	GO:0097066	response to thyroid hormone	5			1	2	1	1					1	1	1	1					1	2					22
254	BP	GO:0048545	response to steroid hormone	5	1	6	1	4	1	6	0.861	9	1	6	1	1	1	3	1	4	1	2	1	7	1	6	1	4	450
255	BP	GO:0043627	response to estrogen	6	1	4	1	2	1	4	1	4	1	3			1	1	1	2	1	2	1	3	1	3	1	2	225
256	BP	GO:0032355	response to estradiol	7	1	1	1	2	1	3			1	2							1	1	1	1	1	2			149
257	BP	GO:0031960	response to corticosteroid	6	1	1	1	2	1	1	1	3	1	3	1	1							1	2	1	2			181
258	BP	GO:0051385	response to mineralocorticoid	7									1	1															33
259	BP	GO:1904044	response to aldosterone	8									1	1															1
260	BP	GO:0051384	response to glucocorticoid	7	1	1	1	1	1	1	1	3	1	2	1	1							1	2	1	1			169
261	BP	GO:0071548	response to dexamethasone	8	1	1			1	1																			34
262	BP	GO:0051414	response to cortisol	8							1	1	1	1	1	1													5
263	BP	GO:0032570	response to progesterone	6	1	1			1	1	1	1					1	1	1	2							1	1	42
264	BP	GO:0033574	response to testosterone	6					1	1					1	1							1	2			1	1	38
265	BP	GO:0055094	response to lipoprotein particle	4									1	1					1	1	1	1							21
266	BP	GO:0055098	response to low-density lipoprotein particle	5									1	1					1	1	1	1							15
267	BP	GO:0070849	response to epidermal growth factor	4	1	1	1	1							1	2			1	2			1	1	1	1			31
268	BP	GO:0071559	response to transforming growth factor beta	4	1	3	1	2	0.216	7	1	5	1	6	1	3			1	1	1	1	0.243	7	0.0126	9	1	2	249
269	BP	GO:0010243	response to organonitrogen compound	4	0.317	15	0.0491	15	0.18	14	0.00572	18	1	7	0.0912	16	0.045	16	1	13	1	10	1	9	1	13	1	12	998
270	BP	GO:1904585	response to putrescine	5			1	1	1	1																			1
271	BP	GO:0071680	response to indole-3-methanol	5													1	1			1	1	1	1			1	1	5
272	BP	GO:0014075	response to amine	5	1	1	1	1	1	1					1	2							1	1	1	1			52
273	BP	GO:0001975	response to amphetamine	6	1	1			1	1																			34
274	BP	GO:0043279	response to alkaloid	5	1	2			1	3	1	3			1	2	1	1	1	1	1	2	1	1	1	2	1	2	147
275	BP	GO:0014072	response to isoquinoline alkaloid	6							1	1											1	1	1	1			32
276	BP	GO:0043278	response to morphine	7							1	1											1	1	1	1			32
277	BP	GO:0035094	response to nicotine	6					1	1	1	1																	55
278	BP	GO:0042220	response to cocaine	6	1	1			1	2	1	1					1	1	1	1	1	2			1	1	1	2	51
279	BP	GO:0071867	response to monoamine	5					1	2							1	2	1	1									35
280	BP	GO:0071869	response to catecholamine	6					1	2							1	2	1	1									33
281	BP	GO:1903350	response to dopamine	7					1	1																			9
282	BP	GO:1901652	response to peptide	5	0.231	12	1	9	1	8	0.05	13	1	6	0.231	12	0.581	11	0.686	11	1	7	1	4	1	8	1	8	652
283	BP	GO:0043434	response to peptide hormone	6	0.136	12	1	8	1	8	0.0277	13	1	6	0.136	12	0.358	11	0.424	11	1	7	1	4	1	8	1	8	616
284	BP	GO:0097210	response to gonadotropin-releasing hormone	7											1	1													8
285	BP	GO:1990637	response to prolactin	7	1	1			1	1	1	1					1	1									1	1	3
286	BP	GO:0032868	response to insulin	7	1	9	1	7	1	3	1	8	1	4	1	9	1	7	1	8	1	6	1	4	1	6	1	5	463
287	BP	GO:0060416	response to growth hormone	7											1	1			1	1					1	1			43
288	BP	GO:0033762	response to glucagon	7			1	1	1	2	1	2	1	1	1	1	1	2	1	2					1	1			49
289	BP	GO:0014074	response to purine-containing compound	5	1	2			1	4	1	2	1	1	1	1	1	2	1	1	1	2	1	1			1	3	161
290	BP	GO:0031000	response to caffeine	6					1	2					1	1													20
291	BP	GO:0033198	response to ATP	6	1	1			1	1	1	1					1	1	1	1	1	1					1	1	32
292	BP	GO:0051591	response to cAMP	6	1	1			1	1	1	1	1	1			1	1			1	1	1	1			1	2	103
293	BP	GO:0070305	response to cGMP	6							1	1																	7
294	BP	GO:0034776	response to histamine	5																			1	1					11
295	BP	GO:0043200	response to amino acid	5	1	1	1	4	1	2	1	1	1	1	1	1	1	2	1	1					1	3	1	1	117
296	BP	GO:1902065	response to L-glutamate	6									1	1			1	1	1	1									6
297	BP	GO:1901355	response to rapamycin	5			1	1	1	1																			2
298	BP	GO:0036119	response to platelet-derived growth factor	4					1	2																			18
299	BP	GO:0071774	response to fibroblast growth factor	4	1	7	1	1	1	3	1	6	1	4	1	2	1	3	1	4	1	2	1	1	1	5	1	5	347
300	BP	GO:1990089	response to nerve growth factor	4	1	1	1	1	1	3	0.0905	4	1	2			1	3	1	1			1	1	1	1	1	2	40
301	BP	GO:0014823	response to activity	3	1	2	1	1	1	3	1	1	1	1	1	1	1	2	0.849	4	1	3			1	1			72
302	BP	GO:0051775	response to redox state	3			1	1															1	1					13
303	BP	GO:0071461	cellular response to redox state	4			1	1															1	1					3
304	BP	GO:0009607	response to biotic stimulus	3	0.000276	20	0.0417	15	0.155	14	6.52e-08	25	1	10	0.272	15	0.000101	20	0.000679	19	0.732	13	0.732	13	0.389	15	1	12	984
305	BP	GO:0002347	response to tumor cell	4	1	1			1	1	1	1	1	1			1	2	1	1	1	1					1	1	18
306	BP	GO:0006950	response to stress	3	3.56e-22	78	2.34e-28	78	1.47e-16	62	2.58e-18	72	3.56e-20	67	1.39e-23	80	4.44e-22	75	1.46e-13	63	1.34e-14	60	1.07e-12	57	7.83e-30	90	7.67e-12	57	4101
307	BP	GO:0035966	response to topologically incorrect protein	4	1	3	1	5	1	3	1	5	1	4	1	2	0.474	6	1	4	1	2	1	3	1	3	1	5	181
308	BP	GO:0006986	response to unfolded protein	5	1	3	1	5	1	3	1	5	1	4	1	2	0.337	6	1	4	1	2	1	3	1	3	1	4	170
309	BP	GO:0051788	response to misfolded protein	5	1	1			1	1	1	1					1	1	1	1	1	1					1	2	16
310	BP	GO:0009611	response to wounding	4	0.716	15	6.36e-08	24	1	13	1	13	1	10	0.00465	19	1	14	1	13	1	13	0.00201	18	1.92e-07	26	0.749	14	1078
311	BP	GO:0048678	response to axon injury	5	1	3	1	1	1	2	1	1	1	2	1	2	1	3	1	2	1	2	1	2	1	3	1	1	67
312	BP	GO:0042060	wound healing	5	1	9	1.97e-08	21	1	9	1	9	1	9	0.00284	16	1	11	1	10	1	9	0.0105	14	1.01e-06	21	1	11	753
313	BP	GO:0034405	response to fluid shear stress	4																					1	1			36
314	BP	GO:0051409	response to nitrosative stress	4													1	1											6
315	BP	GO:0006979	response to oxidative stress	4	0.0123	11	0.00266	11	0.00245	11	1	7	1	6	1	6	0.0459	10	0.305	9	0.0218	10	1	4	0.000391	13	1	8	401
316	BP	GO:0000302	response to reactive oxygen species	5	1	6	0.11	7	0.875	6	1	5	1	4	1	4	1	4	1	5	0.962	6	1	1	0.318	7	1	4	222
317	BP	GO:0000305	response to oxygen radical	6					1	1	1	1							1	1	1	2					1	1	30
318	BP	GO:0000303	response to superoxide	7					1	1	1	1							1	1	1	2					1	1	29
319	BP	GO:0042542	response to hydrogen peroxide	6	0.0907	6	0.542	5	1	3	0.891	5	1	3	1	3	1	3	1	4	0.562	5	1	1	1	5	1	2	128
320	BP	GO:0071731	response to nitric oxide	6			1	1	1	2			1	1					1	1							1	1	23
321	BP	GO:0033194	response to hydroperoxide	5	1	1																			1	1			18
322	BP	GO:0006991	response to sterol depletion	4	1	1	1	1			1	1	1	1	1	1													11
323	BP	GO:0035902	response to immobilization stress	4					1	1	1	1							1	1	1	1							24
324	BP	GO:0035900	response to isolation stress	4					1	1	1	1							1	1	1	1							3
325	BP	GO:0002931	response to ischemia	4	1	1	1	2			1	1	1	1	1	1							1	1	1	2	1	1	32
326	BP	GO:0006952	defense response	4	0.0052	26	0.00791	23	1	18	0.0142	25	0.023	22	1.71e-07	34	0.149	22	0.0724	23	0.883	19	0.0342	22	0.00307	27	1	17	1867
327	BP	GO:0006968	cellular defense response	5									1	1	1	1	1	1	1	2	1	1							62
328	BP	GO:0006954	inflammatory response	5	1	8	1	4	1	6	1	6	1	4	1	3	1	7	1	4	1	6	1	6	1	5	1	8	656
329	BP	GO:0090594	inflammatory response to wounding	6					1	1	1	1															1	1	7
330	BP	GO:0002526	acute inflammatory response	6	1	2	1	1	1	1	1	1	1	1			1	1	1	1	1	2	1	1			1	3	145
331	BP	GO:0006953	acute-phase response	7			1	1			1	1	1	1					1	1	1	1	1	1			1	1	58
332	BP	GO:0002544	chronic inflammatory response	6					1	1									1	1							1	1	24
333	BP	GO:0002246	wound healing involved in inflammatory response	6					1	1	1	1															1	1	7
334	BP	GO:0009628	response to abiotic stimulus	3	0.000542	22	0.00231	19	0.00858	18	0.000116	23	0.128	16	0.00799	20	0.00317	20	6.32e-05	23	0.0464	17	0.572	15	6.07e-07	27	1	13	1226
335	BP	GO:0070482	response to oxygen levels	4	1	6	1	4	1	7	0.546	8	1	5	1	3	1	5	0.461	8	1	7	1	4	1	5	1	6	334
336	BP	GO:0036296	response to increased oxygen levels	5					1	2	1	1							1	1	1	1							27
337	BP	GO:0055093	response to hyperoxia	6					1	2	1	1							1	1	1	1							27
338	BP	GO:0036293	response to decreased oxygen levels	5	1	6	1	4	1	6	0.376	8	1	4	1	3	1	5	0.316	8	1	7	1	4	1	5	1	6	316
339	BP	GO:0001666	response to hypoxia	6	1	6	1	4	1	6	0.309	8	1	3	1	3	1	5	0.26	8	0.875	7	1	4	1	5	1	6	307
340	BP	GO:0071000	response to magnetism	4					1	1	1	1							1	1	1	1							4
341	BP	GO:0009314	response to radiation	4	1	5	1	7	1	6	1	8	1	7	0.524	10	1	5	1	8	1	6	1	4	0.000163	15	1	3	511
342	BP	GO:0009416	response to light stimulus	5	1	5	1	4	1	2	1	3	1	6	1	7	1	4	1	7	1	5	1	4	0.0533	10	1	1	374
343	BP	GO:0009411	response to UV	6	1	4	1	1	1	2	1	2	1	2	1	4	1	2	1	3	1	2	1	1	1	4	1	1	133
344	BP	GO:0010225	response to UV-C	7	1	1			1	1							1	1	1	1	1	1					1	1	14
345	BP	GO:0070141	response to UV-A	7	1	1			1	1	1	1																	6
346	BP	GO:0009650	UV protection	7	1	1													1	1	1	1			1	1			12
347	BP	GO:0010224	response to UV-B	7	1	1			1	1					1	1											1	1	18
348	BP	GO:0009642	response to light intensity	6											1	1													11
349	BP	GO:0036367	light adaption	7											1	1													2
350	BP	GO:0009648	photoperiodism	6	1	1					1	1	1	1			1	1	1	1			1	2	1	1			24
351	BP	GO:0010212	response to ionizing radiation	5	1	2	1	2	1	3	1	4	1	1	1	3	1	1	1	2	1	2	1	2	0.252	6	1	2	149
352	BP	GO:0010332	response to gamma radiation	6	1	1	1	1	1	2	1	2			1	1			1	1	1	1	1	1	0.321	4	1	1	53
353	BP	GO:0009268	response to pH	4											1	1			1	1					1	1			43
354	BP	GO:0010447	response to acidic pH	5											1	1			1	1					1	1			20
355	BP	GO:0051602	response to electrical stimulus	4			1	2	1	2	1	1			1	1			1	2	1	1	1	1	1	1			48
356	BP	GO:0009266	response to temperature stimulus	4	5.42e-06	12	1	5	0.000136	10	0.00555	9	1	4	1	4	0.000379	10	0.0386	8	0.165	7	1	3	1	5	1	5	234
357	BP	GO:0009408	response to heat	5	1.3e-07	12	1	4	9.85e-05	9	0.00432	8	1	4	1	2	0.00309	8	0.357	6	0.22	6	1	2	1	3	1	5	169
358	BP	GO:0009409	response to cold	5	1	1	1	1	1	2	1	2			1	2	1	2	1	3	1	2	1	1	1	1	1	1	49
359	BP	GO:0009415	response to water	4			1	1			1	2																	18
360	BP	GO:0009414	response to water deprivation	5			1	1			1	1																	11
361	BP	GO:0051599	response to hydrostatic pressure	5							1	1																	7
362	BP	GO:0006970	response to osmotic stress	4			1	1							1	2	1	1	1	1			1	1	1	2	1	1	72
363	BP	GO:0006972	hyperosmotic response	5			1	1							1	1									1	1			24
364	BP	GO:0009605	response to external stimulus	3	4.1e-06	38	8.45e-10	40	0.0165	27	1.26e-09	44	0.00539	28	9.17e-08	41	1.71e-07	39	1.5e-09	43	0.000293	31	2.9e-08	38	1.82e-11	48	0.00073	31	2565
365	BP	GO:0071496	cellular response to external stimulus	4	1	2	1	2	1	1	1	4	1	4	1	3	1	3	1	4	1	3	1	4	1	7			285
366	BP	GO:0042330	taxis	4	1	7	0.00972	15	1	4	1	7	1	7	0.261	14	1	11	1	8	1	6	1	11	0.101	15	1	6	870
367	BP	GO:0006935	chemotaxis	5	1	7	0.00972	15	1	4	1	7	1	7	0.261	14	1	11	1	8	1	6	1	11	0.101	15	1	6	870
368	BP	GO:0050918	positive chemotaxis	6	1	1	1	1					1	3	1	1	0.012	5			1	1	1	2	1	1	1	1	54
369	BP	GO:0043207	response to external biotic stimulus	4	0.00015	20	0.112	14	0.103	14	2.91e-08	25	1	9	0.18	15	0.00128	18	0.00038	19	0.507	13	0.507	13	0.856	14	1	11	947
370	BP	GO:0009991	response to extracellular stimulus	4	1	8	1	9	1	9	0.0444	12	0.0516	11	0.957	10	1	9	0.000175	15	0.0619	11	1	8	0.00249	14	0.429	10	552
371	BP	GO:0031667	response to nutrient levels	5	1	8	0.914	9	1	8	0.128	11	0.0308	11	0.619	10	1	9	8.49e-05	15	0.202	10	1	8	0.00729	13	0.273	10	522
372	BP	GO:0090649	response to oxygen-glucose deprivation	6									1	1															3
373	BP	GO:0007584	response to nutrient	6	1	4	1	4	1	2	1	5	1	4			1	2	0.131	7	1	4	1	3	1	4	1	3	205
374	BP	GO:0033273	response to vitamin	7	1	1	1	3	1	2	1	3	1	2					1	2	1	2			1	3	1	1	106
375	BP	GO:0033189	response to vitamin A	8					1	1																			22
376	BP	GO:0033197	response to vitamin E	8																					1	1			15
377	BP	GO:0033591	response to L-ascorbic acid	8					1	1	1	1							1	1	1	1							9
378	BP	GO:0033280	response to vitamin D	8	1	1	1	1			1	2	1	2					1	1	1	1			1	1			39
379	BP	GO:0051593	response to folic acid	8			1	2																	1	1	1	1	13
380	BP	GO:0032094	response to food	6			1	1																					38
381	BP	GO:0042594	response to starvation	6	1	2	1	1			1	1	1	1	1	4	1	4	1	4	1	2	1	3	1	5	1	1	164
382	BP	GO:0060004	reflex	4							1	1									1	1	1	1			1	1	22
383	BP	GO:0060013	righting reflex	5							1	1									1	1	1	1			1	1	9
384	BP	GO:0009612	response to mechanical stimulus	4	1	1	1	1			1	3	1	2			1	2	1	3	1	2	1	3	1	2	1	1	221
385	BP	GO:0035994	response to muscle stretch	5							1	1																	20
386	BP	GO:0051606	detection of stimulus	3	1	3	1	3	1	2	1	3	1	3	1	3	1	3	1	4	1	6	1	3	1	6	1	3	772
387	BP	GO:0009581	detection of external stimulus	4			1	3					1	1	1	3	1	2	1	2	1	2	1	3	1	6	1	1	197
388	BP	GO:0009582	detection of abiotic stimulus	4			1	3					1	1	1	3	1	2	1	2	1	2	1	3	1	6	1	1	201
389	BP	GO:0050982	detection of mechanical stimulus	5													1	1			1	1	1	1	1	1	1	1	48
390	BP	GO:0016048	detection of temperature stimulus	5																					1	1			19
391	BP	GO:0009583	detection of light stimulus	5			1	3					1	1	1	3	1	1	1	2	1	1	1	2	1	5			135
392	BP	GO:0009584	detection of visible light	6			1	3					1	1	1	3	1	1	1	2	1	1	1	2	0.794	5			120
393	BP	GO:0009593	detection of chemical stimulus	4	1	1			1	2	1	2					1	1	1	2	1	2					1	1	530
394	BP	GO:0003032	detection of oxygen	5					1	1	1	1							1	1	1	1							5
395	BP	GO:0002236	detection of misfolded protein	5	1	1			1	1	1	1					1	1	1	1	1	1					1	1	1
396	BP	GO:0006955	immune response	3	0.33	21	0.0876	20	1	13	0.0366	23	0.245	19	1.76e-06	31	1	16	1	13	1	13	1	16	0.192	22	1	14	1728
397	BP	GO:0002251	organ or tissue specific immune response	4																			1	1					36
398	BP	GO:0002385	mucosal immune response	5																			1	1					34
399	BP	GO:0006959	humoral immune response	4	1	2	1	1	1	2							1	1			1	2	1	1			1	2	203
400	BP	GO:0042092	type 2 immune response	4											1	1							1	1					32
401	BP	GO:0002250	adaptive immune response	4	1	4	1	5	1	4	1	3	1	3	1	4	1	4	1	1	1	3	1	1			1	3	369
402	BP	GO:0002460	adaptive immune response based on somatic recombination of immune receptors built from immunoglobulin superfamily domains	5	1	4	1	3	1	3	1	2	1	3	1	3	1	4	1	1	1	3	1	1			1	3	240
403	BP	GO:0042088	T-helper 1 type immune response	6									1	1	1	1	1	1					1	1					36
404	BP	GO:0002456	T cell mediated immunity	6	1	2	1	1	1	2	1	1	1	1			1	3	1	1	1	3					1	2	79
405	BP	GO:0019724	B cell mediated immunity	6	1	4	1	2	1	2	1	2	1	2	1	2	1	3	1	1	1	2					1	3	129
406	BP	GO:0016064	immunoglobulin mediated immune response	7	1	4	1	2	1	2	1	2	1	2	1	2	1	3	1	1	1	2					1	3	126
407	BP	GO:0002455	humoral immune response mediated by circulating immunoglobulin	8	1	1											1	1			1	1					1	1	70
408	BP	GO:0002381	immunoglobulin production involved in immunoglobulin mediated immune response	8	1	3	1	2	1	2	1	2	1	2	1	2	1	2	1	1	1	1					1	2	46
409	BP	GO:0002418	immune response to tumor cell	4	1	1			1	1	1	1	1	1			1	2	1	1	1	1					1	1	15
410	BP	GO:0002424	T cell mediated immune response to tumor cell	5	1	1			1	1	1	1	1	1			0.144	2	1	1	1	1					1	1	3
411	BP	GO:0045087	innate immune response	4	0.417	16	0.059	16	1	9	0.00938	19	0.723	14	3.55e-05	23	1	14	1	10	1	10	0.894	14	0.602	16	1	9	1140
412	BP	GO:0002227	innate immune response in mucosa	5																			1	1					24
413	BP	GO:0002228	natural killer cell mediated immunity	5			1	2					1	1	1	2									1	2			61
414	BP	GO:0034340	response to type I interferon	5	1	3					1	4	1	2	1	3	1	1	1	2	1	1	1	1			1	1	85
415	BP	GO:0034341	response to interferon-gamma	5	1	1	1	2	1	3	1	4	1	2	1	2	1	1			1	3	1	1	1	1	1	2	157
416	BP	GO:0002437	inflammatory response to antigenic stimulus	4	1	1							1	2			1	2							1	1			54
417	BP	GO:0051179	localization	2	2.04e-17	85	2.66e-31	95	2.76e-17	75	6.9e-24	95	5.07e-18	76	9.96e-33	108	6.48e-40	113	1.84e-44	120	7.57e-33	98	1.32e-38	105	5.3e-46	127	1.43e-36	105	5739
418	BP	GO:0051234	establishment of localization	3	8.13e-15	72	6.48e-26	80	5.03e-13	61	6.08e-20	80	2.49e-14	63	1.63e-32	98	7.54e-38	101	1.53e-43	109	2.22e-32	89	3.17e-39	97	1.05e-45	116	1.7e-36	96	4711
419	BP	GO:0006810	transport	4	3.41e-13	68	5.12e-26	79	5.12e-13	60	2.64e-16	73	1.06e-13	61	2.87e-31	95	3.8e-38	100	3.66e-42	106	1.5e-32	88	1.9e-39	96	1.97e-44	113	7.02e-36	94	4571
420	BP	GO:0071705	nitrogen compound transport	5	3.55e-14	30	7.1e-08	21	6.08e-08	21	4.34e-08	23	0.00356	15	0.0295	15	6.07e-16	31	3.15e-09	24	1.34e-08	22	0.000165	17	0.000499	18	4.05e-09	23	807
421	BP	GO:1903513	endoplasmic reticulum to cytosol transport	5									1	1									1	1			1	2	57
422	BP	GO:0071702	organic substance transport	5	6.88e-15	53	5.7e-15	48	1.17e-13	46	2.01e-16	55	1.06e-13	46	1.08e-20	61	3.01e-36	77	4.95e-46	88	5.6e-37	74	3.89e-24	60	2.45e-25	68	1.8e-38	77	2637
423	BP	GO:0015931	nucleobase-containing compound transport	6	1.2e-18	21	5.04e-13	16	4.42e-13	16	2.73e-17	20	2.35e-05	10	0.00011	10	1.08e-20	22	4.25e-12	16	3.62e-17	19	6.29e-09	13	0.00015	10	5.21e-14	17	194
424	BP	GO:0050657	nucleic acid transport	7	2.17e-20	21	2.51e-14	16	2.2e-14	16	6.11e-19	20	3.89e-06	10	1.88e-05	10	1.56e-22	22	2.16e-13	16	9.72e-19	19	5.76e-10	13	2.56e-05	10	2.13e-15	17	161
425	BP	GO:0045117	azole transport	6	1	1																			1	1	1	1	18
426	BP	GO:0072337	modified amino acid transport	6							1	1									1	1	1	1	1	1	1	1	25
427	BP	GO:1901998	toxin transport	5							1	1			1	1					1	1			1	1			40
428	BP	GO:0098657	import into cell	5			1	1	1	1			1	1			1	1	1	1	1	1			1	2			44
429	BP	GO:0016192	vesicle-mediated transport	5	1	10	7.09e-11	31	0.178	17	0.00427	22	0.0515	18	1.08e-22	48	2.57e-05	25	3.44e-09	31	1	13	1.08e-15	37	6.97e-24	50	0.000154	23	1400
430	BP	GO:0006897	endocytosis	6	1	6	6.95e-08	19	1	9	1	10	1	9	5.96e-12	25	0.0239	13	7.23e-07	19	1	9	7.38e-07	18	1.53e-05	18	0.0683	12	639
431	BP	GO:0006898	receptor-mediated endocytosis	7	1	4	1	6	1	3	1	4	1	5	1	4	1	5	0.0337	9	1	5	1	2	1	4	0.146	8	301
432	BP	GO:0072584	caveolin-mediated endocytosis	8															1	1									10
433	BP	GO:0072583	clathrin-mediated endocytosis	8			1	1					1	1			1	3	1	2					1	1	1	1	55
434	BP	GO:0006907	pinocytosis	7			1	1	1	1	1	1			1	2							1	1	1	1			17
435	BP	GO:0051674	localization of cell	3	1	15	0.0068	19	1	6	1	12	1	14	1	16	1	16	1	14	1	11	0.392	16	0.000859	23	1	15	1320
436	BP	GO:0033036	macromolecule localization	3	1.8e-16	57	9.3e-21	57	9.15e-22	58	1.12e-25	69	1.15e-22	59	1.09e-24	68	6.49e-42	85	6.96e-51	95	4.92e-41	80	1.87e-31	70	2.01e-29	75	1.85e-45	86	2805
437	BP	GO:0006403	RNA localization	4	4.9e-20	22	8.19e-16	18	8.06e-19	20	1.45e-21	23	9.34e-08	12	6.8e-07	12	1.18e-23	24	2.18e-13	17	3.68e-23	23	6.72e-09	13	1.31e-05	11	8.57e-17	19	195
438	BP	GO:0048254	snoRNA localization	5					1	1	0.286	2			1	1					0.282	2					1	1	4
439	BP	GO:0090672	telomerase RNA localization	5	1	1					1	1	1	1	1	1											1	1	16
440	BP	GO:0090670	RNA localization to Cajal body	5	1	1					1	1	1	1	1	1											1	1	16
441	BP	GO:0090671	telomerase RNA localization to Cajal body	6	1	1					1	1	1	1	1	1											1	1	16
442	BP	GO:0051236	establishment of RNA localization	5	2.84e-20	21	3.06e-14	16	2.69e-14	16	7.87e-19	20	4.38e-06	10	2.11e-05	10	2.07e-22	22	2.64e-13	16	1.24e-18	19	6.76e-10	13	2.89e-05	10	2.64e-15	17	163
443	BP	GO:0050658	RNA transport	6	2.17e-20	21	2.51e-14	16	2.2e-14	16	6.11e-19	20	3.89e-06	10	1.88e-05	10	1.56e-22	22	2.16e-13	16	9.72e-19	19	5.76e-10	13	2.56e-05	10	2.13e-15	17	161
444	BP	GO:1990428	miRNA transport	7	1	1	1	1	1	1											1	1					1	1	1
445	BP	GO:0051028	mRNA transport	7	1.8e-20	20	1.59e-12	14	4.35e-14	15	5.87e-19	19	6.91e-07	10	0.0108	7	2.65e-24	22	3.66e-13	15	1.27e-18	18	1.56e-09	12	7.49e-05	9	9.88e-17	17	135
446	BP	GO:0008104	protein localization	4	5.37e-09	42	3.81e-11	41	1.4e-10	40	2.88e-12	47	1.02e-15	47	1.36e-21	60	2.47e-28	66	1.24e-39	79	4.19e-24	58	7.33e-26	60	8.93e-25	65	4.53e-31	67	2445
447	BP	GO:1902414	protein localization to cell junction	5			1	1							1	1	0.714	2					1	1	1	1			6
448	BP	GO:0071896	protein localization to adherens junction	6													0.287	2											4
449	BP	GO:1902396	protein localization to bicellular tight junction	6			1	1							1	1							1	1	1	1			1
450	BP	GO:0035418	protein localization to synapse	5																					1	1			25
451	BP	GO:0008105	asymmetric protein localization	5					1	1			1	1	1	2	0.237	3	1	2			1	1	1	2			20
452	BP	GO:0045176	apical protein localization	6									1	1	1	1	1	1	1	1			1	1	1	2			13
453	BP	GO:0061467	basolateral protein localization	6					1	1					1	1	1	1	1	1									1
454	BP	GO:0031503	protein complex localization	5	1	1	1	3					1	1	1	2	1	2	1	1			1	3	1	2			108
455	BP	GO:0045184	establishment of protein localization	5	9.25e-10	39	1.46e-09	35	5.7e-07	31	3.34e-09	38	7.08e-12	38	2.18e-23	57	7.53e-26	58	1.53e-39	73	1.02e-24	54	6.69e-23	52	2.59e-24	59	2.32e-28	59	2012
456	BP	GO:0015031	protein transport	5	8.53e-09	36	4.4e-09	33	4e-07	30	1.33e-07	34	2.08e-11	36	6.27e-20	51	9.64e-26	56	1.08e-38	70	2.14e-25	53	8.17e-21	48	1.95e-23	56	3.25e-28	57	1862
457	BP	GO:0010876	lipid localization	4	1	5	1	4	1	1	1	6	1	6	1	3	1	4	1	4	1	6	1	3	1	5	1	6	343
458	BP	GO:0051641	cellular localization	3	5.61e-19	63	3.36e-22	61	1.83e-18	56	3.72e-25	71	2.66e-19	57	1.53e-26	73	1.56e-35	81	6.64e-44	91	7.75e-33	74	2.94e-29	70	1.86e-35	85	9.15e-40	83	3044
459	BP	GO:0071166	ribonucleoprotein complex localization	4	9.35e-17	16	8.25e-10	11	2.08e-11	12	1.87e-18	17	0.000444	7	0.00118	7	1.56e-15	15	3.28e-09	11	3.63e-16	15	3.09e-08	10	8.24e-05	8	2.91e-14	14	97
460	BP	GO:0070727	cellular macromolecule localization	4	5.6e-09	33	1.72e-10	32	4.54e-09	30	4.65e-09	33	3.31e-12	34	1.31e-12	38	7.67e-17	42	3.36e-31	58	3.16e-25	49	1.28e-18	42	1.76e-18	46	2.76e-28	53	1549
461	BP	GO:0034613	cellular protein localization	5	4.63e-09	33	8.31e-10	31	1.11e-07	28	3.85e-09	33	1.72e-11	33	1.05e-12	38	5.91e-17	42	2.3e-31	58	2.3e-25	49	9.8e-19	42	1.33e-18	46	1.95e-28	53	1538
462	BP	GO:0034394	protein localization to cell surface	6			1	2	1	1					1	1	1	1	1	1			1	1	1	3			47
463	BP	GO:0033365	protein localization to organelle	6	1.7e-10	27	2.42e-06	20	2.1e-06	20	2.59e-07	23	1.04e-10	25	0.00509	17	9.38e-17	33	3.69e-30	46	4.76e-28	42	3.63e-14	29	7.55e-12	29	2.79e-27	42	884
464	BP	GO:0072665	protein localization to vacuole	7					1	1	1	1	1	1			1	1	1	1	1	1			1	1	1	1	33
465	BP	GO:0061462	protein localization to lysosome	8					1	1	1	1	1	1			1	1	1	1	1	1			1	1	1	1	20
466	BP	GO:0034504	protein localization to nucleus	7	7.83e-07	15	8.76e-06	13	1	7	0.00351	11	0.315	8	1	6	0.0157	10	1	4	0.000902	11	0.35	8	1.23e-06	15	0.0708	9	354
467	BP	GO:1902570	protein localization to nucleolus	8			1	1							1	1									1	1			3
468	BP	GO:0044380	protein localization to cytoskeleton	7							1	2			1	1			1	1			1	1	1	2			35
469	BP	GO:0072698	protein localization to microtubule cytoskeleton	8							1	2			1	1			1	1			1	1	1	2			31
470	BP	GO:0035372	protein localization to microtubule	9							1	1			1	1			1	1			1	1	1	1			9
471	BP	GO:0071539	protein localization to centrosome	9																					1	1			21
472	BP	GO:1902480	protein localization to mitotic spindle	9							1	1																	1
473	BP	GO:0034067	protein localization to Golgi apparatus	7									1	1	1	1	1	1	1	1	1	1			1	1			32
474	BP	GO:0034502	protein localization to chromosome	7	1	3	1	1	1	2	1	2	0.279	4	1	2	1	1							1	2	1	1	58
475	BP	GO:0071168	protein localization to chromatin	8					1	1	1	1	1	2			1	1							1	1			15
476	BP	GO:0070198	protein localization to chromosome, telomeric region	8	1	2			1	1	1	1	1	1	1	1									1	1	1	1	25
477	BP	GO:0071459	protein localization to chromosome, centromeric region	8	1	1	1	1					1	1	1	1									1	1			13
478	BP	GO:0034501	protein localization to kinetochore	9	1	1	1	1					1	1	1	1									1	1			11
479	BP	GO:0070585	protein localization to mitochondrion	7	0.897	6	0.0482	7	1	4	0.866	6	0.453	6	0.0131	8	0.707	6	0.771	6	1	5	0.00487	8	1	5	0.00055	9	195
480	BP	GO:0036010	protein localization to endosome	7					1	1			1	1			1	1	1	1			1	2			1	1	13
481	BP	GO:1902946	protein localization to early endosome	8																			0.701	2					6
482	BP	GO:0070972	protein localization to endoplasmic reticulum	7	1	2			1	4			0.0638	6	1	1	2.35e-10	13	2.15e-43	33	2.24e-30	25	9.74e-07	10	1	4	2.07e-21	20	137
483	BP	GO:0070973	protein localization to endoplasmic reticulum exit site	8																			1	1					3
484	BP	GO:0072594	establishment of protein localization to organelle	7	1.08e-09	23	1.11e-06	18	0.0574	12	0.000534	16	0.000325	15	0.00305	15	3.37e-16	29	1.31e-30	42	5.86e-28	38	3.33e-13	25	3.91e-12	26	1.1e-23	35	667
485	BP	GO:0070199	establishment of protein localization to chromosome	8	1	1					1	1			1	1									1	1	1	1	23
486	BP	GO:0070200	establishment of protein localization to telomere	9	1	1					1	1			1	1											1	1	15
487	BP	GO:0071169	establishment of protein localization to chromatin	9																					1	1			7
488	BP	GO:0072599	establishment of protein localization to endoplasmic reticulum	8	1	2			1	4			0.372	5	1	1	3.31e-11	13	7.22e-44	32	2.71e-30	24	5.1e-06	9	1	4	4.41e-21	19	118
489	BP	GO:0072655	establishment of protein localization to mitochondrion	8	0.782	6	0.0407	7	1	4	0.754	6	0.393	6	0.0108	8	0.615	6	0.671	6	1	5	0.00401	8	1	5	0.000441	9	190
490	BP	GO:0072600	establishment of protein localization to Golgi	8									1	1							1	1			1	1			21
491	BP	GO:0072666	establishment of protein localization to vacuole	8					1	1	1	1	1	1			1	1	1	1	1	1			1	1	1	1	27
492	BP	GO:1990778	protein localization to cell periphery	6	1	3	1	2	1	2	1	3	1	2	1	5	1	6	0.166	7	0.771	6	1	4	1	5	0.0122	8	213
493	BP	GO:1902463	protein localization to cell leading edge	6							1	1					1	1	1	1									2
494	BP	GO:0034629	cellular protein complex localization	6	1	1	1	1					1	1	1	1							1	1	1	1			26
495	BP	GO:0051601	exocyst localization	7																			1	1					11
496	BP	GO:0072356	chromosome passenger complex localization to kinetochore	7	1	1							1	1															2
497	BP	GO:0008298	intracellular mRNA localization	5			1	1	1	2			1	1															11
498	BP	GO:0051640	organelle localization	4	1	5	0.397	9	1	4	0.00136	13	1	4	6.12e-08	18	1	5	1	6	1	5	3.35e-05	14	8.71e-15	25	1	8	466
499	BP	GO:0050000	chromosome localization	5	1	2	1	1			0.0262	5	1	2	1	2			1	1	1	2	1	3	0.554	4	1	2	61
500	BP	GO:0033750	ribosome localization	5	1	1	1	1	1	1					1	1					1	1	1	2	1	1			8
501	BP	GO:0051647	nucleus localization	5	1	1	1	1			1	2			1	1					1	1	1	2	1	1	1	1	25
502	BP	GO:0032418	lysosome localization	5	1	1																			1	2	1	1	49
503	BP	GO:0051646	mitochondrion localization	5			1	1									1	1	1	1	1	1	1	1			1	1	36
504	BP	GO:0051642	centrosome localization	5																			1	1					21
505	BP	GO:0051645	Golgi localization	5			1	1			1	1			1	2					1	1	0.0414	3	1	1	1	1	12
506	BP	GO:0032439	endosome localization	5					1	1																			3
507	BP	GO:0051648	vesicle localization	5	1	2	1	3	1	2	1	6	1	1	7.21e-06	12	1	4	1	3	1	1	1	4	3.61e-10	16	1	4	240
508	BP	GO:0097479	synaptic vesicle localization	6	1	1			1	1	1	1			1	1	1	1							1	3	1	3	114
509	BP	GO:0051656	establishment of organelle localization	5	1	5	0.329	8	1	3	6.06e-05	13	1	3	6.71e-10	18	1	5	1	6	1	5	0.000105	12	2.07e-16	24	1	7	355
510	BP	GO:0051668	localization within membrane	4			1	2	1	1	1	4	1	2	8.41e-08	10	1	4	1	4	1	3	1	3	1.16e-07	10	1	2	93
511	BP	GO:0051665	membrane raft localization	5			1	1													1	1					1	1	5
512	BP	GO:0044856	plasma membrane raft localization	6			1	1																			1	1	1
513	BP	GO:0051649	establishment of localization in cell	4	2.01e-18	58	1.38e-19	54	6.37e-13	45	4.55e-20	60	3.73e-15	48	2.11e-25	67	3.25e-36	77	5.42e-46	88	4.22e-33	70	2.62e-30	67	1.55e-35	80	1.52e-35	74	2640
514	BP	GO:0099504	synaptic vesicle cycle	5	1	1			1	1					1	1	1	1							1	3	1	2	89
515	BP	GO:0033753	establishment of ribosome localization	5	1	1	1	1	1	1					1	1					1	1	1	2	1	1			8
516	BP	GO:0046907	intracellular transport	5	1.1e-18	50	3.73e-18	45	1.35e-12	38	1.25e-19	51	7.96e-16	42	1.43e-24	57	8.82e-38	69	1e-49	81	7.7e-37	65	1.05e-30	59	8.61e-34	68	6.38e-42	71	1905
517	BP	GO:0016482	cytoplasmic transport	6	2.03e-16	39	7.32e-14	33	2.22e-11	30	6.94e-24	47	5.34e-14	33	4.44e-19	42	1.69e-34	56	2.22e-46	67	2.56e-38	57	2.97e-28	48	4.62e-32	56	1.06e-40	60	1257
518	BP	GO:0051169	nuclear transport	6	4.16e-19	28	2.22e-16	24	1.44e-07	16	7.42e-17	26	1.43e-06	15	2.05e-06	16	2.55e-16	25	9.73e-06	15	3.38e-16	24	1.3e-11	20	2.64e-15	25	2.27e-12	21	443
519	BP	GO:0006913	nucleocytoplasmic transport	7	3.06e-19	28	1.71e-16	24	1.22e-07	16	5.6e-17	26	1.22e-06	15	1.74e-06	16	1.94e-16	25	8.36e-06	15	2.6e-16	24	1.05e-11	20	2.56e-14	24	1.81e-12	21	438
520	BP	GO:0051168	nuclear export	8	4.16e-19	20	1.67e-14	16	4.35e-13	15	9.3e-15	17	7.27e-09	12	0.000208	9	1.02e-13	16	6.41e-07	11	2.17e-14	16	1.96e-07	11	1.33e-06	11	4.09e-14	16	157
521	BP	GO:0006405	RNA export from nucleus	9	6.83e-22	19	5.03e-13	13	1.02e-14	14	7.04e-17	16	6.76e-07	9	0.0011	7	1.32e-15	15	8.16e-08	10	1.44e-14	14	2.04e-05	8	7.59e-05	8	5.6e-16	15	96
522	BP	GO:0051170	nuclear import	8	3.12e-08	15	6.66e-06	12	1	4	0.00312	10	1	4	1	5	0.00202	10	1	3	0.0698	8	0.0698	8	5.71e-07	14	0.631	7	281
523	BP	GO:0071167	ribonucleoprotein complex import into nucleus	9							1	1									1	1							2
524	BP	GO:0006886	intracellular protein transport	6	4.94e-09	27	3.14e-09	25	0.0031	17	0.00194	19	7.11e-07	22	1.25e-10	29	9.84e-17	35	6.41e-33	51	9.32e-28	44	3.05e-17	34	3.7e-17	37	8.6e-25	42	1022
525	BP	GO:0051683	establishment of Golgi localization	5			1	1			1	1			1	2					1	1	0.00669	3	1	1	1	1	7
526	BP	GO:0051654	establishment of mitochondrion localization	5													1	1	1	1	1	1							17
527	BP	GO:0051303	establishment of chromosome localization	5	1	2	1	1			0.0262	5	1	2	1	2			1	1	1	2	1	3	0.554	4	1	2	61
528	BP	GO:0040023	establishment of nucleus localization	5	1	1	1	1			1	2			1	1					1	1	1	2	1	1	1	1	15
529	BP	GO:0007097	nuclear migration	6	1	1	1	1			1	1			1	1							1	1					10
530	BP	GO:0051650	establishment of vesicle localization	5	1	2	1	3	1	2	1	6	1	1	4.04e-06	12	1	4	1	3	1	1	1	4	1.63e-10	16	1	4	228
531	BP	GO:0097480	establishment of synaptic vesicle localization	6	1	1			1	1	1	1			1	1	1	1							1	3	1	3	108
532	BP	GO:0044699	single-organism process	2	7.85e-67	212	6.68e-83	201	2.89e-67	186	2.14e-78	223	3.54e-51	169	1.06e-85	231	5.74e-72	208	1.15e-76	216	8.15e-63	185	5.12e-81	202	2.63e-113	260	1.48e-65	193	13769
533	BP	GO:0016265	death	3	5.05e-09	38	1.75e-15	43	2.73e-10	36	6.58e-14	45	2.55e-10	36	5.39e-11	41	6.34e-15	45	1.26e-11	41	1.46e-08	34	3.01e-07	32	5.93e-14	46	1.42e-05	30	2026
534	BP	GO:0044710	single-organism metabolic process	3	2.87e-39	116	1.96e-32	96	2.57e-27	89	7.31e-43	120	1.76e-24	85	9.64e-29	102	2.86e-36	108	6.71e-36	109	1.86e-42	109	2.14e-23	85	3.69e-39	118	6.01e-37	105	5684
535	BP	GO:0042440	pigment metabolic process	4			1	3	1	1	1	1	1	1	1	3							1	1	1	1	1	1	69
536	BP	GO:0019748	secondary metabolic process	4			0.000414	6							1	1					1	2	1	1	1	3	1	1	58
537	BP	GO:0030638	polyketide metabolic process	5			0.000159	4													1	1	1	1	1	2			10
538	BP	GO:0044712	single-organism catabolic process	4	6.42e-05	23	0.00128	19	0.985	14	5.34e-07	26	9.64e-06	22	0.0164	19	1.54e-07	26	1.31e-06	25	3e-06	23	0.00697	18	0.00726	20	1.25e-06	24	1178
539	BP	GO:0046149	pigment catabolic process	5			1	1			1	1			1	1									1	1			8
540	BP	GO:0030214	hyaluronan catabolic process	5	1	1			1	1	1	1	1	1			1	1			1	1	1	1			1	2	16
541	BP	GO:1901657	glycosyl compound metabolic process	4	1	8	0.000412	12	1	6	1	5	0.0219	10	0.0857	10	0.307	9	1	4	1	4	0.0258	10	1	7	1	8	409
542	BP	GO:1901658	glycosyl compound catabolic process	5			1	1																					41
543	BP	GO:0016137	glycoside metabolic process	5			0.00176	4													1	1	1	1	1	2			17
544	BP	GO:0030647	aminoglycoside antibiotic metabolic process	6			0.000159	4													1	1	1	1	1	2			10
545	BP	GO:1901568	fatty acid derivative metabolic process	4	1	1	1	4			1	1					1	1			1	1	1	1	1	2			106
546	BP	GO:0044723	single-organism carbohydrate metabolic process	4	1	12	0.117	13	1	7	8.15e-05	19	1	10	1.71e-05	20	1	12	1	11	1	11	1	10	0.000152	19	0.2	13	829
547	BP	GO:0044724	single-organism carbohydrate catabolic process	5	1	2	1	3			1	3	1	4	1	3	1	1	1	2			1	3	1	3	1	2	138
548	BP	GO:0070085	glycosylation	5	1	6	1	5	1	5	0.121	10	1	4	0.000578	13	1	6	1	5	1	5	1	4	0.000122	14	1	6	429
549	BP	GO:0036065	fucosylation	6					1	1									1	1							1	1	24
550	BP	GO:0043413	macromolecule glycosylation	6	1	6	1	5	1	5	0.109	10	1	4	0.000506	13	1	6	1	5	1	5	1	4	0.000106	14	1	6	424
551	BP	GO:0044711	single-organism biosynthetic process	4	8.31e-07	32	1.47e-05	27	0.000209	25	5.27e-13	41	2.71e-06	28	1.98e-07	33	6.96e-07	31	0.00332	25	8.74e-05	26	0.0516	21	0.00388	26	5.08e-05	27	1776
552	BP	GO:1901659	glycosyl compound biosynthetic process	5	1	2	1	3	1	3	1	2	1	4	0.986	5	1	4	1	1	1	1	0.604	5			1	3	130
553	BP	GO:1901570	fatty acid derivative biosynthetic process	5			0.224	4			1	1					1	1					1	1	1	1			55
554	BP	GO:0006023	aminoglycan biosynthetic process	5	1	1					1	1			1	1			1	1							1	1	115
555	BP	GO:0006024	glycosaminoglycan biosynthetic process	6	1	1					1	1			1	1			1	1							1	1	114
556	BP	GO:0030213	hyaluronan biosynthetic process	7	1	1					1	1			1	1			1	1							1	1	14
557	BP	GO:0046148	pigment biosynthetic process	5			1	2	1	1			1	1	1	2							1	1			1	1	53
558	BP	GO:0044550	secondary metabolite biosynthetic process	5			1	1							1	1													25
559	BP	GO:0016051	carbohydrate biosynthetic process	5	1	3	0.597	6	1	1	0.152	7	1	5	1	2	1	4	1	5	1	4	1	2			1	4	205
560	BP	GO:0000271	polysaccharide biosynthetic process	6	1	1	1	3			1	3	1	2	1	1			1	1			1	1			1	1	78
561	BP	GO:0072376	protein activation cascade	4	1	2			1	1							1	1			1	1					1	2	98
562	BP	GO:0045730	respiratory burst	4	1	1											1	1			1	1					1	1	32
563	BP	GO:0055114	oxidation-reduction process	4	3.27e-08	27	1.89e-08	25	9.51e-05	20	4.06e-06	24	0.00216	18	1.78e-07	26	1.22e-09	28	0.000228	21	0.000144	20	2.87e-05	21	1.84e-06	25	3.91e-07	24	1111
564	BP	GO:0070988	demethylation	4	1	3	1	1	1	1			1	1			1	1	1	2	1	1	1	2	1	3	1	1	69
565	BP	GO:0070989	oxidative demethylation	5	1	1																							15
566	BP	GO:0044281	small molecule metabolic process	4	4.09e-13	51	2.42e-18	53	2.32e-07	37	1.39e-12	50	4.26e-05	33	1.21e-07	42	3.26e-17	55	2.25e-24	65	1.35e-23	60	3.57e-17	52	1.8e-14	54	7.25e-15	50	2701
567	BP	GO:0018904	ether metabolic process	5			1	1							1	1							1	1	1	2			13
568	BP	GO:1901503	ether biosynthetic process	6																					1	1			5
569	BP	GO:0006662	glycerol ether metabolic process	6			1	1							1	1							1	1	1	2			12
570	BP	GO:0044282	small molecule catabolic process	5	0.0264	10	9.18e-05	12	1	4	0.834	8	1	6	0.872	8	0.107	9	0.124	9	0.00766	10	0.363	8	1	8	0.0106	10	356
571	BP	GO:0044283	small molecule biosynthetic process	5	1	8	0.000228	14	1	7	0.0016	14	1	7	1	6	0.00507	13	0.0339	12	0.324	10	1	9	1	8	1	9	553
572	BP	GO:0006766	vitamin metabolic process	5	1	4	1	3	1	1	1	3	1	2	1	3	1	3	1	1	1	5	0.266	6	0.601	6	1	3	175
573	BP	GO:0006775	fat-soluble vitamin metabolic process	6			1	3			1	1			1	1					1	1	1	2	1	2			78
574	BP	GO:0006767	water-soluble vitamin metabolic process	6	1	4			1	1	1	2	1	2	1	2	1	3	1	1	1	4	1	4	1	4	1	3	97
575	BP	GO:0006066	alcohol metabolic process	5	1	4	0.0162	10	1	3	1	5	1	1	1	4	1	4	1	4	1	5	1	3	1	7	1	4	393
576	BP	GO:0034308	primary alcohol metabolic process	6			1	1	1	1					1	1									1	1	1	1	46
577	BP	GO:0006067	ethanol metabolic process	7					1	1																	1	1	14
578	BP	GO:0006069	ethanol oxidation	8					1	1																	1	1	12
579	BP	GO:1902652	secondary alcohol metabolic process	6	1	1	0.542	5	1	1	1	2			1	2	1	2	1	3	1	3	1	1	1	4	1	2	128
580	BP	GO:0019751	polyol metabolic process	6	1	2	1	2					1	1			1	1			1	1	1	2			1	1	107
581	BP	GO:0046165	alcohol biosynthetic process	6	1	3	0.00988	7	1	2	1	5	1	1	1	1	1	3	1	3	1	3	1	2	1	4	1	2	153
582	BP	GO:0046173	polyol biosynthetic process	7	1	1	1	2					1	1			1	1			1	1	1	1			1	1	39
583	BP	GO:1902653	secondary alcohol biosynthetic process	7	1	1	1	3	1	1	1	2			1	1	1	1	1	2	1	2	1	1	1	3	1	1	50
584	BP	GO:0046164	alcohol catabolic process	6			1	2	1	1															1	1	1	1	56
585	BP	GO:0046174	polyol catabolic process	7			1	1																					18
586	BP	GO:0034310	primary alcohol catabolic process	7			1	1	1	1															1	1	1	1	9
587	BP	GO:0006068	ethanol catabolic process	8					1	1																	1	1	5
588	BP	GO:0005996	monosaccharide metabolic process	5	1	4	0.995	7	1	2	0.384	8	1	6	1	4	1	6	1	5	1	6	1	5	1	4	1	6	317
589	BP	GO:0019321	pentose metabolic process	6			1	1																					13
590	BP	GO:0046365	monosaccharide catabolic process	6	1	1	1	3			1	2	1	3	1	2	1	1	1	2			1	3	1	2	1	2	61
591	BP	GO:0046364	monosaccharide biosynthetic process	6	1	2	1	2	1	1	1	4	1	4	1	1	1	4	1	4	1	4	1	2			1	3	95
592	BP	GO:0019322	pentose biosynthetic process	7			1	1																					4
593	BP	GO:0019318	hexose metabolic process	6	1	4	0.375	7	1	2	0.128	8	1	6	1	4	1	5	1	5	1	5	1	5	1	4	1	5	270
594	BP	GO:0019320	hexose catabolic process	7	1	1	1	3			1	1	1	3	1	1	1	1	1	2			1	2	1	2	1	1	51
595	BP	GO:0006000	fructose metabolic process	7			1	1																					13
596	BP	GO:0006012	galactose metabolic process	7			1	2			1	1	1	1									1	1	1	1			13
597	BP	GO:0019388	galactose catabolic process	8			0.713	2					1	1									1	1	1	1			6
598	BP	GO:0006006	glucose metabolic process	7	1	4	1	5	1	2	0.328	7	1	6	1	4	1	5	1	5	1	5	1	4	1	3	1	5	232
599	BP	GO:0006007	glucose catabolic process	8	1	1	1	1			1	1	1	2	1	1	1	1	1	2			1	1	1	1	1	1	34
600	BP	GO:0019319	hexose biosynthetic process	7	1	2	1	1	1	1	1	3	1	4			1	4	1	4	1	4	1	1			1	2	88
601	BP	GO:0006094	gluconeogenesis	8	1	2			1	1	1	3	1	4			1	4	1	4	1	4	1	1			1	2	85
602	BP	GO:0046370	fructose biosynthetic process	8			1	1																					2
603	BP	GO:0006629	lipid metabolic process	4	1	17	1.35e-06	25	1	11	0.33	18	1	11	0.011	21	0.00422	21	0.673	17	0.000203	22	1	15	0.000397	24	1	12	1363
604	BP	GO:0008202	steroid metabolic process	5	1	1	0.0119	9	1	1	1	4	1	1	1	2	1	4	1	4	0.717	7	1	3	0.0512	9	1	2	297
605	BP	GO:0008211	glucocorticoid metabolic process	6																					1	1			25
606	BP	GO:0016125	sterol metabolic process	6	1	1	0.795	5	1	1	1	2			1	2	1	3	1	4	1	3	1	1	1	4	1	2	139
607	BP	GO:0008203	cholesterol metabolic process	7	1	1	0.485	5	1	1	1	2			1	2	1	2	1	3	1	3	1	1	1	4	1	2	125
608	BP	GO:0042359	vitamin D metabolic process	6							1	1																	19
609	BP	GO:0008610	lipid biosynthetic process	5	1	6	0.00187	14	1	4	1	10	1	4	1	5	0.033	13	1	8	1	7	1	5	1	11	1	5	659
610	BP	GO:0006694	steroid biosynthetic process	6	1	1	0.133	6	1	1	1	3	1	1	1	1	1	3	1	3	1	3	1	1	1	5	1	1	156
611	BP	GO:0006704	glucocorticoid biosynthetic process	7																					1	1			18
612	BP	GO:0016126	sterol biosynthetic process	7	1	1	1	3	1	1	1	2			1	1	1	2	1	3	1	2	1	1	1	3	1	1	55
613	BP	GO:0006695	cholesterol biosynthetic process	8	1	1	1	3	1	1	1	2			1	1	1	1	1	2	1	2	1	1	1	3	1	1	50
614	BP	GO:0016042	lipid catabolic process	5	1	4	0.0995	8	1	4	1	4	1	4	1	3	1	6	1	4	0.108	8	1	3	1	1	1	4	299
615	BP	GO:0043473	pigmentation	3			1	1	1	2	1	1			1	4	1	1	1	3	1	1			1	4	1	1	96
616	BP	GO:0043474	pigment metabolic process involved in pigmentation	4																							1	1	4
617	BP	GO:0043476	pigment accumulation	4																							1	1	13
618	BP	GO:1902578	single-organism localization	3	2.27e-13	65	2.46e-22	71	6.91e-10	52	4.09e-14	66	2.51e-12	56	2.48e-22	79	5.38e-29	85	1.47e-39	99	2.15e-30	82	2.89e-37	90	1.48e-39	103	1.08e-34	89	4182
619	BP	GO:0044765	single-organism transport	4	4.1e-13	63	3.4e-21	68	4.87e-10	51	1.57e-11	60	3.75e-13	56	1.92e-21	76	2.27e-30	85	1.85e-39	97	9.55e-32	82	3.33e-35	86	7.06e-38	99	1.38e-33	86	4002
620	BP	GO:0015669	gas transport	5																	1	1							19
621	BP	GO:0015671	oxygen transport	6																	1	1							15
622	BP	GO:0072348	sulfur compound transport	5							1	1									1	1	1	1	1	1	1	1	31
623	BP	GO:0006818	hydrogen transport	5	1	5	1	2	1	1	1	3	1	2	1	2	1	4	1	2	1	2	1	5	1	5	0.188	6	159
624	BP	GO:0051031	tRNA transport	5																	1	1							4
625	BP	GO:1901571	fatty acid derivative transport	5			1	2			1	1	1	1			1	2	1	1	1	1					1	1	42
626	BP	GO:1902582	single-organism intracellular transport	5	7.25e-18	47	1.54e-14	39	1.03e-10	34	5.44e-18	47	4.47e-13	37	1.1e-18	48	4.7e-35	64	2.7e-49	78	5.02e-37	63	9.48e-29	55	2.29e-30	62	2.16e-43	70	1742
627	BP	GO:1902593	single-organism nuclear import	6	3.08e-07	14	6.61e-05	11	1	3	0.153	8	1	3	1	5	0.0149	9	1	3	0.469	7	0.0631	8	4.73e-07	14	1	6	277
628	BP	GO:0071426	ribonucleoprotein complex export from nucleus	6	5.48e-17	16	5.79e-10	11	1.41e-11	12	2.13e-15	15	0.000357	7	0.0157	6	9.46e-16	15	6.59e-08	10	1.06e-14	14	2.24e-08	10	6.43e-05	8	1.83e-14	14	94
629	BP	GO:0071431	tRNA-containing ribonucleoprotein complex export from nucleus	7																	1	1							2
630	BP	GO:0071428	rRNA-containing ribonucleoprotein complex export from nucleus	7	1	1	1	1	1	1					1	1					1	1	1	2	1	1			11
631	BP	GO:0071427	mRNA-containing ribonucleoprotein complex export from nucleus	7	5.26e-18	16	4.8e-09	10	1.12e-10	11	2.41e-16	15	0.000138	7	0.114	5	1.07e-16	15	1.64e-08	10	3.38e-12	12	5.78e-06	8	0.000464	7	2.42e-15	14	82
632	BP	GO:0006406	mRNA export from nucleus	8	5.26e-18	16	4.8e-09	10	1.12e-10	11	2.41e-16	15	0.000138	7	0.114	5	1.07e-16	15	1.64e-08	10	3.38e-12	12	5.78e-06	8	0.000464	7	2.42e-15	14	82
633	BP	GO:0016197	endosomal transport	6	1	1	1	4	0.026	8	0.0744	8	0.00278	9	9.91e-07	13	6.76e-05	11	1.39e-11	17	1	2	0.00323	9	1.23e-07	14	0.000437	10	250
634	BP	GO:0032456	endocytic recycling	7					1	1	1	1	1	2	1	2	0.594	3	0.0171	4					1	2	1	1	27
635	BP	GO:0044795	trans-Golgi network to recycling endosome transport	7							1	1					1	1	1	1									1
636	BP	GO:1990126	retrograde transport, endosome to plasma membrane	7			1	1							0.0835	3	1	1	1	2			1	2	0.0921	3			14
637	BP	GO:0042147	retrograde transport, endosome to Golgi	7	1	1	1	3	0.497	4	0.724	4	0.52	4	0.742	4	1	2	1	3	1	1	1	3	0.00284	6	1	3	68
638	BP	GO:0048227	plasma membrane to endosome transport	7					1	1	1	1	1	1	1	2	1	2	0.0125	3			1	1	1	1	1	1	8
639	BP	GO:0045022	early endosome to late endosome transport	7			1	1	1	1	1	2	1	1	1	2	1	2	0.0767	4	1	1	1	3	1	2	1	3	39
640	BP	GO:0007034	vacuolar transport	6			1	1	1	2	1	1	1	3	1	2	1	1	1	1	1	2	1	2	1	4	1	3	90
641	BP	GO:0007041	lysosomal transport	7			1	1	1	2	1	1	1	2	1	2	1	1	1	1	1	2	1	2	1	2	1	2	64
642	BP	GO:0008333	endosome to lysosome transport	8			1	1	1	1			1	2	1	2	1	1	1	1	1	2	1	2	1	1	1	2	42
643	BP	GO:0045324	late endosome to vacuole transport	7			1	1							1	2							1	1	1	1			15
644	BP	GO:1902774	late endosome to lysosome transport	8			1	1							0.721	2							1	1	1	1			6
645	BP	GO:0006839	mitochondrial transport	6	0.000418	11	0.0673	8	1	6	0.177	8	0.0655	8	0.027	9	0.0177	9	0.148	8	0.535	7	0.00892	9	1	5	1.13e-06	13	283
646	BP	GO:0030705	cytoskeleton-dependent intracellular transport	6	1	1	0.504	5	1	1	1	2	1	1	0.000491	8	1	3	1	3	1	1	1	3	0.0996	6	1	3	126
647	BP	GO:0099515	actin filament-based transport	7			1	1							1	1							1	1	1	1			6
648	BP	GO:0048193	Golgi vesicle transport	6	1	5	1	6	1	4	0.0979	9	0.219	8	3.81e-07	15	0.00994	10	0.000196	12	1	4	1	6	5.38e-09	17	0.0471	9	336
649	BP	GO:0006891	intra-Golgi vesicle-mediated transport	7							1	1	1	1	1	2									8.94e-06	7	1	1	47
650	BP	GO:0000301	retrograde transport, vesicle recycling within Golgi	8									1	1											1	1			24
651	BP	GO:0006890	retrograde vesicle-mediated transport, Golgi to ER	7									1	1	0.0019	5					1	1	1	1	0.0691	4			36
652	BP	GO:0006892	post-Golgi vesicle-mediated transport	7	1	4	1	2	1	2	1	2	1	2	0.683	5	1	4	0.0535	6	1	2	1	1	0.00615	7	1	3	120
653	BP	GO:0006893	Golgi to plasma membrane transport	8	1	2			1	1	1	2			1	2	1	3	1	3	1	1			1	2	1	1	49
654	BP	GO:0006896	Golgi to vacuole transport	8					1	1																			5
655	BP	GO:0090160	Golgi to lysosome transport	9					1	1																			3
656	BP	GO:0006895	Golgi to endosome transport	8									1	1	1	1	1	1	1	1					1	1			20
657	BP	GO:0006888	ER to Golgi vesicle-mediated transport	7	1	1	1	3	1	2	0.429	6	1	3	0.000431	9	1	5	1	5	1	3	1	5	2.17e-07	12	1	5	171
658	BP	GO:0034498	early endosome to Golgi transport	7			1	1			1	1	0.739	2															6
659	BP	GO:0032066	nucleolus to nucleoplasm transport	6																					1	1			3
660	BP	GO:0006605	protein targeting	6	2.49e-08	22	1.88e-05	17	0.0202	13	0.0056	15	0.000109	16	0.478	12	1.55e-15	29	8.28e-31	43	1.69e-29	40	1.19e-11	24	1.48e-11	26	5.16e-24	36	706
661	BP	GO:0032527	protein exit from endoplasmic reticulum	6									1	1									1	1			1	2	35
662	BP	GO:0006611	protein export from nucleus	6	1	3	0.00992	5			1	1	1	3	0.351	4	1	2	1	1	1	1	1	2	0.398	4	1	1	56
663	BP	GO:0006409	tRNA export from nucleus	6																	1	1							2
664	BP	GO:0016973	poly(A)+ mRNA export from nucleus	6	1	1	1	1	1	1	1	1					1	1	1	2			1	1					14
665	BP	GO:0015849	organic acid transport	5	1	4	1	4	1	2	1	4	1	4	1	2	1	6	1	5	1	6	1	3	1	5	1	7	306
666	BP	GO:0051030	snRNA transport	5	0.146	2									1	1													3
667	BP	GO:0006408	snRNA export from nucleus	6	0.0487	2									1	1													2
668	BP	GO:0015748	organophosphate ester transport	5																					1	1			86
669	BP	GO:0015850	organic hydroxy compound transport	5	1	1	1	1			1	2	1	1							1	2	1	2	1	2	1	2	236
670	BP	GO:0006836	neurotransmitter transport	5	1	1			1	2					1	1	1	1			1	1			1	3	1	1	183
671	BP	GO:0006811	ion transport	5	1	16	1	13	1	8	1	10	1	11	1	13	0.81	18	1	15	1	15	1	15	0.0123	23	0.0418	20	1549
672	BP	GO:0099587	inorganic ion import into cell	6			1	1	1	1			1	1			1	1	1	1	1	1			1	1			13
673	BP	GO:0006812	cation transport	6	1	12	1	6	1	6	1	6	1	7	1	8	1	11	1	11	1	9	1	12	1	13	0.0435	16	1052
674	BP	GO:0072512	trivalent inorganic cation transport	7	1	2	1	1					1	1	1	2			1	3	1	1	1	2	1	2	1	2	38
675	BP	GO:0072511	divalent inorganic cation transport	7	1	3	1	3	1	3	1	2	1	2	1	3	1	3	1	2	1	5	1	6	1	5	1	5	430
676	BP	GO:0098659	inorganic cation import into cell	7			1	1	1	1			1	1			1	1	1	1	1	1			1	1			13
677	BP	GO:0015672	monovalent inorganic cation transport	7	1	8	1	2	1	2	1	4	1	3	1	3	1	5	1	4	1	3	1	5	1	7	0.672	10	584
678	BP	GO:0015696	ammonium transport	8	1	2																			1	1	1	2	91
679	BP	GO:0051608	histamine transport	9	1	1																			1	1	1	1	11
680	BP	GO:0015992	proton transport	8	1	5	1	2	1	1	1	3	1	2	1	2	1	4	1	2	1	2	1	5	1	5	0.175	6	157
681	BP	GO:0030001	metal ion transport	7	1	6	1	6	1	4	1	4	1	5	1	7	1	6	1	8	1	7	1	10	1	11	1	8	813
682	BP	GO:0000041	transition metal ion transport	8	1	2	1	3	1	2			1	3	1	2	1	2	1	4	1	2	1	2	1	2	1	2	110
683	BP	GO:0006825	copper ion transport	9			1	1	1	1							1	1											19
684	BP	GO:0006826	iron ion transport	9	1	2	1	2	1	1			1	3	1	2	1	1	0.345	4	1	2	1	2	1	2	1	2	57
685	BP	GO:0015682	ferric iron transport	10	1	2	1	1					1	1	1	2			1	3	1	1	1	2	1	2	1	2	38
686	BP	GO:0033572	transferrin transport	11	1	2	1	1					1	1	1	2			1	3	1	1	1	2	1	2	1	2	36
687	BP	GO:0097286	iron ion import	10			1	1	1	1			1	2			1	1	1	2	1	2	1	1			1	1	10
688	BP	GO:0097459	iron ion import into cell	11			1	1	1	1			1	1			1	1	1	1	1	1							7
689	BP	GO:0070838	divalent metal ion transport	8	1	3	1	3	1	3	1	2	1	2	1	3	1	3	1	2	1	5	1	6	1	5	1	5	427
690	BP	GO:0006816	calcium ion transport	9	1	3	1	2	1	2	1	2	1	2	1	3	1	3	1	2	1	4	1	6	1	5	1	5	380
691	BP	GO:0070509	calcium ion import	10	1	3	1	1	1	1	1	1	1	1	1	1	1	2			1	2	1	3	1	3	1	2	151
692	BP	GO:1990035	calcium ion import into cell	11																					1	1			4
693	BP	GO:0060401	cytosolic calcium ion transport	10	1	3	1	1	1	1	1	1	1	1			1	2			1	1	1	3	1	1	1	2	126
694	BP	GO:1903515	calcium ion transport from cytosol to endoplasmic reticulum	11					1	1																			1
695	BP	GO:0070296	sarcoplasmic reticulum calcium ion transport	10					1	1																			33
696	BP	GO:1990036	calcium ion import into sarcoplasmic reticulum	11					1	1																			3
697	BP	GO:0015684	ferrous iron transport	9			1	1	1	1											1	1							8
698	BP	GO:0070627	ferrous iron import	10			1	1	1	1											1	1							5
699	BP	GO:0097460	ferrous iron import into cell	11			1	1	1	1											1	1							4
700	BP	GO:0006814	sodium ion transport	8			1	1			1	2			1	2	1	1	1	2	1	1	1	2	1	3	1	2	206
701	BP	GO:0006813	potassium ion transport	8	1	1			1	1			1	1							1	1			1	2	1	1	217
702	BP	GO:0006820	anion transport	6	1	5	1	5	1	2	1	5	1	4	1	4	1	6	1	6	1	7	1	3	1	9	1	7	582
703	BP	GO:0015698	inorganic anion transport	7	1	1	1	1			1	1			1	1									1	2			130
704	BP	GO:0006821	chloride transport	8											1	1									1	2			101
705	BP	GO:0006817	phosphate ion transport	8	1	1	1	1			1	1																	18
706	BP	GO:0015711	organic anion transport	7	1	4	1	4	1	2	1	4	1	4	1	2	1	6	1	5	1	7	1	3	1	6	1	7	426
707	BP	GO:0015701	bicarbonate transport	8																	1	1							40
708	BP	GO:0046942	carboxylic acid transport	8	1	4	1	4	1	2	1	4	1	4	1	2	1	6	1	5	1	6	1	3	1	5	1	7	304
709	BP	GO:0071715	icosanoid transport	9			1	2			1	1	1	1			1	2	1	1	1	1					1	1	42
710	BP	GO:0006835	dicarboxylic acid transport	9	1	1	1	1	1	1					1	1	1	1			1	1	1	1	1	2	1	1	91
711	BP	GO:0015740	C4-dicarboxylate transport	10													1	1											11
712	BP	GO:0015742	alpha-ketoglutarate transport	10																	1	1					1	1	2
713	BP	GO:0006842	tricarboxylic acid transport	9													1	1	1	1									4
714	BP	GO:0015746	citrate transport	10													1	1	1	1									4
715	BP	GO:0015718	monocarboxylic acid transport	9	1	3	1	3	1	1	1	4	1	4	1	1	1	4	1	3	1	5	1	2	1	3	1	5	154
716	BP	GO:0006865	amino acid transport	9	1	1	1	1	1	1					1	1	1	1	1	1			1	1	1	2	1	1	150
717	BP	GO:0043090	amino acid import	10															1	1							1	1	18
718	BP	GO:0015800	acidic amino acid transport	10	1	1	1	1	1	1					1	1	1	1					1	1	1	2			26
719	BP	GO:0015810	aspartate transport	11													1	1											10
720	BP	GO:0015807	L-amino acid transport	10	1	1	1	1	1	1					1	1	1	1					1	1	1	2			63
721	BP	GO:0070778	L-aspartate transport	11													1	1											5
722	BP	GO:0015813	L-glutamate transport	11	1	1	1	1	1	1					1	1	1	1					1	1	1	2			23
723	BP	GO:0015803	branched-chain amino acid transport	10															1	1							1	1	4
724	BP	GO:0015804	neutral amino acid transport	10															1	1							1	1	36
725	BP	GO:0015820	leucine transport	11															1	1							1	1	3
726	BP	GO:0060356	leucine import	12															1	1							1	1	1
727	BP	GO:0015801	aromatic amino acid transport	10															1	1							1	1	5
728	BP	GO:0015827	tryptophan transport	11															1	1							1	1	3
729	BP	GO:0042044	fluid transport	5	1	1			1	1	1	1	1	1			1	1	1	1					1	1			50
730	BP	GO:0006833	water transport	6					1	1			1	1			1	1	1	1					1	1			43
731	BP	GO:0046903	secretion	5	1	13	1	12	0.476	14	1	13	1	13	0.0059	19	0.000125	21	0.0495	17	1	11	0.0109	17	5.14e-08	27	1	12	1096
732	BP	GO:0046717	acid secretion	6			1	2			1	2	1	1			1	2	1	1	1	2	1	1	1	1	1	2	115
733	BP	GO:0032309	icosanoid secretion	7			1	2			1	1	1	1			1	2	1	1	1	1					1	1	38
734	BP	GO:0001821	histamine secretion	6	1	1																			1	1	1	1	9
735	BP	GO:0071985	multivesicular body sorting pathway	5									1	1			1	1			1	1	1	1			1	1	11
736	BP	GO:0042886	amide transport	5	1	7	1	4	1	4	1	3	1	5	1	4	0.138	9	0.879	8	1	3	1	4	1	6	1	4	368
737	BP	GO:0015833	peptide transport	6	1	7	1	4	1	4	1	3	1	5	1	4	0.0823	9	0.562	8	1	3	1	4	1	6	1	4	344
738	BP	GO:0006857	oligopeptide transport	7							1	1									1	1	1	1	1	1	1	1	8
739	BP	GO:0042939	tripeptide transport	8							1	1									1	1	1	1	1	1	1	1	1
740	BP	GO:0034635	glutathione transport	9							1	1									1	1	1	1	1	1	1	1	1
741	BP	GO:0002790	peptide secretion	7	1	7	1	2	1	4	1	2	1	5	1	3	0.814	7	0.903	7	1	2	1	1	1	4	1	3	281
742	BP	GO:0008643	carbohydrate transport	5	0.0112	8	1	2	1	3	1	3	1	4	1	3	1	5	1	2	1	3	1	2	1	1	1	1	191
743	BP	GO:0015749	monosaccharide transport	6	0.00216	8	1	2	1	3	1	3	1	4	1	3	1	5	1	2	1	3	1	2	1	1	1	1	153
744	BP	GO:0008645	hexose transport	7	0.00195	8	1	2	1	3	1	3	1	4	1	3	1	5	1	2	1	3	1	2	1	1	1	1	151
745	BP	GO:0015758	glucose transport	8	0.00176	8	1	2	1	3	1	3	1	4	1	3	1	5	1	2	1	3	1	2	1	1	1	1	149
746	BP	GO:0046323	glucose import	9	1	1					1	1	1	1	1	2							1	1					76
747	BP	GO:0045056	transcytosis	5			1	1							1	1							1	1	1	1			12
748	BP	GO:0015697	quaternary ammonium group transport	5	1	1																					1	1	18
749	BP	GO:0015838	amino-acid betaine transport	6	1	1																					1	1	14
750	BP	GO:0015879	carnitine transport	7	1	1																					1	1	13
751	BP	GO:0015837	amine transport	5			1	1															1	1	1	1			79
752	BP	GO:0006909	phagocytosis	5	1	1	0.000186	10	1	3	1	3	1	4	7.21e-06	12	1	5	0.348	7	1	3	0.00231	9	0.0737	8	1	4	240
753	BP	GO:0043277	apoptotic cell clearance	6					1	1			1	2	1	1	1	2	1	2					1	1	1	1	34
754	BP	GO:0006869	lipid transport	5	1	4	1	4	1	1	1	5	1	6	1	3	1	4	1	4	1	6	1	3	1	5	1	6	309
755	BP	GO:0032365	intracellular lipid transport	6	1	1																					1	1	22
756	BP	GO:0015918	sterol transport	6			1	1			1	1									1	1	1	1	1	1			72
757	BP	GO:0030301	cholesterol transport	7			1	1			1	1									1	1	1	1	1	1			70
758	BP	GO:0015914	phospholipid transport	6																					1	1			60
759	BP	GO:0015908	fatty acid transport	6	1	3	1	2	1	1	1	3	1	4	1	1	1	4	1	3	1	3			1	1	1	4	83
760	BP	GO:0015909	long-chain fatty acid transport	7	1	3	1	2	1	1	1	2	1	2	1	1	1	2	1	1	1	1			1	1	1	2	51
761	BP	GO:1903963	arachidonate transport	8			1	2			1	1					1	1											20
762	BP	GO:0050482	arachidonic acid secretion	9			1	2			1	1					1	1											20
763	BP	GO:0044539	long-chain fatty acid import	8	1	1					1	1	1	1			1	1			1	1							7
764	BP	GO:0015732	prostaglandin transport	7			1	1					1	1			1	2	1	1	1	1					1	1	19
765	BP	GO:0032310	prostaglandin secretion	8			1	1					1	1			1	2	1	1	1	1					1	1	16
766	BP	GO:0090323	prostaglandin secretion involved in immune response	9			1	1									1	1											1
767	BP	GO:0015721	bile acid and bile salt transport	6			1	1			1	1									1	2	1	2	1	2	1	1	32
768	BP	GO:0032782	bile acid secretion	7							1	1									1	1	1	1	1	1	1	1	6
769	BP	GO:0017038	protein import	5	2.55e-06	14	3.25e-06	13	1	4	0.0116	10	1	3	1	6	0.0542	9	1	3	0.0278	9	0.0278	9	3.75e-08	16	1	7	326
770	BP	GO:0072321	chaperone-mediated protein transport	5	1	1	1	1	1	1															1	1	1	1	9
771	BP	GO:1902580	single-organism cellular localization	4	3.22e-08	29	3.17e-10	29	0.00403	19	3.23e-06	26	4.49e-05	22	1.37e-13	36	3.96e-17	39	2e-33	56	6.61e-29	49	9.49e-20	40	1.29e-24	49	5.19e-28	49	1284
772	BP	GO:0099518	vesicle cytoskeletal trafficking	5	1	1	1	1	1	1	1	1			1	3	1	1	1	1			1	1	1	2	1	1	41
773	BP	GO:0044744	protein targeting to nucleus	5	3.08e-07	14	6.61e-05	11	1	3	0.153	8	1	3	1	5	0.0149	9	1	3	0.469	7	0.0631	8	4.73e-07	14	1	6	277
774	BP	GO:0048489	synaptic vesicle transport	5	1	1			1	1	1	1			1	1	1	1							1	3	1	3	108
775	BP	GO:0099514	synaptic vesicle cytoskeletal transport	6							1	1			1	1											1	1	17
776	BP	GO:0036465	synaptic vesicle recycling	6													1	1							1	1	1	1	35
777	BP	GO:0048488	synaptic vesicle endocytosis	7													1	1							1	1	1	1	27
778	BP	GO:0045047	protein targeting to ER	5	1	2			1	3			0.316	5			6.03e-10	12	1.85e-42	31	1.09e-30	24	3.75e-06	9	1	4	2.19e-21	19	114
779	BP	GO:0000054	ribosomal subunit export from nucleus	5	1	1	1	1	1	1					1	1					1	1	1	2	1	1			8
780	BP	GO:0000056	ribosomal small subunit export from nucleus	6	1	1	1	1							1	1									1	1			4
781	BP	GO:0000055	ribosomal large subunit export from nucleus	6	1	1	1	1	1	1					1	1					1	1	0.701	2	1	1			6
782	BP	GO:0006623	protein targeting to vacuole	5					1	1	1	1	1	1			1	1	1	1	1	1			1	1	1	1	26
783	BP	GO:0006622	protein targeting to lysosome	6					1	1	1	1	1	1			1	1	1	1	1	1			1	1	1	1	15
784	BP	GO:0000042	protein targeting to Golgi	5									1	1											1	1			19
785	BP	GO:0006606	protein import into nucleus	5	3.08e-07	14	6.61e-05	11	1	3	0.153	8	1	3	1	5	0.0149	9	1	3	0.469	7	0.0631	8	4.73e-07	14	1	6	277
786	BP	GO:0006610	ribosomal protein import into nucleus	6							1	1			1	1	1	1							0.0145	3			8
787	BP	GO:0000060	protein import into nucleus, translocation	6	1	1	0.166	4	1	1	1	2			0.243	4	1	2					1	1	4.45e-07	8	1	1	51
788	BP	GO:0035411	catenin import into nucleus	6	1	1					1	1									1	1	1	2	1	1	1	1	28
789	BP	GO:0006607	NLS-bearing protein import into nucleus	6	0.00961	4	1	1			1	1			1	1	1	1							0.0109	4			23
790	BP	GO:0042991	transcription factor import into nucleus	6	1	1	1	4							1	1	1	2	1	1			1	3	1	3	1	1	100
791	BP	GO:0051531	NFAT protein import into nucleus	7	1	1	1	1																			1	1	17
792	BP	GO:0006608	snRNP protein import into nucleus	6							1	1									1	1							1
793	BP	GO:0098602	single organism cell adhesion	3	1	8	0.0136	14	1	7	1	7	1	6	0.0205	15	0.0102	15	1	11	1	9	0.0161	14	0.0301	15	1	9	782
794	BP	GO:0016337	single organismal cell-cell adhesion	4	1	6	0.15	12	1	6	1	7	1	5	1	11	0.0959	13	1	9	1	9	0.733	11	1	11	1	9	731
795	BP	GO:0007159	leukocyte cell-cell adhesion	5	1	3	1	6	1	5	1	3	1	4	1	8	1	7	1	6	1	6	1	6	1	4	1	6	492
796	BP	GO:0034109	homotypic cell-cell adhesion	5	1	4	0.0343	11	1	6	1	4	1	4	1	9	0.425	10	1	6	1	7	0.212	10	0.838	10	1	7	525
797	BP	GO:0034117	erythrocyte aggregation	6											1	1	1	1	1	1			1	1	1	1			2
798	BP	GO:0086042	cardiac muscle cell-cardiac muscle cell adhesion	6	1	1					1	1					0.00761	3	1	1	1	1	1	1			1	1	7
799	BP	GO:0070486	leukocyte aggregation	6	1	3	1	6	1	5	1	3	1	3	1	6	1	5	1	4	1	5	1	5	1	4	1	6	459
800	BP	GO:0070487	monocyte aggregation	7					1	1	1	1															1	1	5
801	BP	GO:0071593	lymphocyte aggregation	7	1	3	1	6	1	4	1	2	1	3	1	6	1	5	1	4	1	5	1	5	1	4	1	5	452
802	BP	GO:0090136	epithelial cell-cell adhesion	5			1	1							1	1	1	1			1	1	1	2	1	1	1	1	15
803	BP	GO:0071603	endothelial cell-cell adhesion	6													1	1			1	1	1	1			1	1	4
804	BP	GO:0034113	heterotypic cell-cell adhesion	5	1	1			1	1	1	2	1	1			1	3	1	2	1	2	1	1			1	2	47
805	BP	GO:0033631	cell-cell adhesion mediated by integrin	5									1	1			1	1	1	1	1	1							14
806	BP	GO:0008283	cell proliferation	3	6.6e-10	39	1.07e-09	35	0.184	21	0.00151	28	0.529	20	0.00537	27	0.0477	24	0.000226	29	0.00917	24	0.000789	26	1.89e-09	39	0.162	22	1990
807	BP	GO:0033002	muscle cell proliferation	4	1	2	1	3	1	1	1	5	1	2	1	1	1	1			1	2	1	2	1	3	1	2	153
808	BP	GO:0014855	striated muscle cell proliferation	5	1	1	1	1			1	3	1	2	1	1	1	1			1	1	1	1	1	1	1	1	52
809	BP	GO:0014856	skeletal muscle cell proliferation	6	1	1					1	1	1	2			1	1			1	1	1	1			1	1	14
810	BP	GO:0014841	skeletal muscle satellite cell proliferation	7	1	1							1	1			1	1			1	1	1	1			1	1	11
811	BP	GO:0048659	smooth muscle cell proliferation	5	1	2	1	2	1	1	1	2	1	1			1	1			1	2	1	2	1	2	1	2	105
812	BP	GO:1990874	vascular smooth muscle cell proliferation	6																							1	1	3
813	BP	GO:0070661	leukocyte proliferation	4	1	3	1	3	1	1	1	1	1	2	1	3	1	5	1	2	1	3	1	2	1	2	1	3	279
814	BP	GO:0032943	mononuclear cell proliferation	5	1	3	1	3	1	1	1	1	1	2	1	3	1	5	1	2	1	3	1	2	1	2	1	3	267
815	BP	GO:0050673	epithelial cell proliferation	4	0.84	8	1	4	1	3	1	2	1	3	1	2	1	5	1	4	1	3	1	5	1	5	1	6	354
816	BP	GO:1990705	cholangiocyte proliferation	5	1	1																			1	1			3
817	BP	GO:0043616	keratinocyte proliferation	5	1	1	1	2			1	1									1	2	1	1	1	2			38
818	BP	GO:0001935	endothelial cell proliferation	5	1	3			1	1			1	3			1	4	1	2	1	1	1	1			1	3	113
819	BP	GO:0048144	fibroblast proliferation	4	1	1	1	3	1	2	1	3	1	1			1	1	1	1	1	2	1	1	1	2	1	1	90
820	BP	GO:0033687	osteoblast proliferation	4	1	1	1	1									1	1			1	1			1	1			26
821	BP	GO:0061351	neural precursor cell proliferation	4	1	3	1	1	1	1	1	1	1	1	1	2	1	2	1	1	1	1	1	2	1	1	1	1	151
822	BP	GO:0051450	myoblast proliferation	4	1	1																			1	1			16
823	BP	GO:0071335	hair follicle cell proliferation	4			1	1							1	1							1	1					4
824	BP	GO:0072089	stem cell proliferation	4	1	1	1	1	1	2			1	1	1	2	1	2	1	2	1	1			1	2			153
825	BP	GO:0044767	single-organism developmental process	3	7.12e-20	90	2.76e-36	102	2.18e-19	79	1.1e-17	86	5.17e-11	65	1.72e-20	91	7.06e-25	94	1.2e-22	92	4.42e-13	70	1.52e-22	85	9.68e-24	98	6.79e-18	80	5849
826	BP	GO:0021700	developmental maturation	4			1	2			1	2	1	1	1	3	1	2	1	2	1	1	1	1			1	1	245
827	BP	GO:0071695	anatomical structure maturation	5											1	1			1	1	1	1							49
828	BP	GO:0043696	dedifferentiation	4			1	1	1	1																			2
829	BP	GO:0031099	regeneration	4	1	3	1	5	1	2	1	3	1	2	0.659	6	1	1	1	1	1	1	1	2	0.784	6	1	1	184
830	BP	GO:0071696	ectodermal placode development	4			1	1	1	2					1	1	1	1					1	1					17
831	BP	GO:0071697	ectodermal placode morphogenesis	4			1	1	1	2					1	1	1	1					1	1					17
832	BP	GO:0060788	ectodermal placode formation	5			1	1	1	2					1	1	1	1					1	1					17
833	BP	GO:0007568	aging	4	1	6	0.104	8	1	5	1	5	0.718	7	1	3	1	7	1	6	1	6	1	4	1	3	1	6	301
834	BP	GO:0007571	age-dependent general metabolic decline	5					1	1	1	1							1	1	1	1							3
835	BP	GO:0001306	age-dependent response to oxidative stress	6					1	1	1	1							1	1	1	1							3
836	BP	GO:0001315	age-dependent response to reactive oxygen species	7					1	1	1	1							1	1	1	1							1
837	BP	GO:0060322	head development	4	1	11	0.927	11	1	5	1	5	1	7	1	8	1	7	1	11	1	3	1	8	1	7	1	5	762
838	BP	GO:0048066	developmental pigmentation	4					1	1	1	1							1	1	1	1					1	1	49
839	BP	GO:0043324	pigment metabolic process involved in developmental pigmentation	5																							1	1	4
840	BP	GO:0048069	eye pigmentation	5																							1	1	9
841	BP	GO:0042441	eye pigment metabolic process	6																							1	1	4
842	BP	GO:0006726	eye pigment biosynthetic process	7																							1	1	4
843	BP	GO:0061061	muscle structure development	4	0.419	11	0.00341	13	1	9	0.0189	13	1	8	0.0961	12	0.0558	12	0.31	11	1	9	0.000656	14	3.19e-05	17	1	6	594
844	BP	GO:0048857	neural nucleus development	4	1	3	0.606	4					1	3	1	2	0.766	4	0.805	4	1	1	1	3			1	2	71
845	BP	GO:0010171	body morphogenesis	4	1	2			1	1	1	2	1	1			1	2											55
846	BP	GO:0060324	face development	4									1	1					1	1									54
847	BP	GO:0061383	trabecula morphogenesis	4											1	1									1	1			39
848	BP	GO:0061384	heart trabecula morphogenesis	5											1	1									1	1			24
849	BP	GO:0048532	anatomical structure arrangement	4							1	1																	22
850	BP	GO:0048729	tissue morphogenesis	4	1	5	1	6	1	4	1	5	1	4	1	8	1	8	1	5	1	6	1	5	1	10	1	7	632
851	BP	GO:0002009	morphogenesis of an epithelium	5	1	5	1	5	1	4	1	5	1	3	1	7	1	7	1	3	1	5	1	5	1	9	1	7	490
852	BP	GO:0060571	morphogenesis of an epithelial fold	6	1	2					1	1			1	1													28
853	BP	GO:0001738	morphogenesis of a polarized epithelium	6					1	1	1	1			1	1	1	1	1	1	1	1	1	2	1	1	1	1	51
854	BP	GO:0002011	morphogenesis of an epithelial sheet	6	1	1	1	2	1	1							1	1			1	1			1	1	1	1	48
855	BP	GO:0090504	epiboly	7	1	1	1	2									1	1			1	1			1	1	1	1	25
856	BP	GO:0090505	epiboly involved in wound healing	8	1	1	1	2									1	1			1	1			1	1	1	1	24
857	BP	GO:0048730	epidermis morphogenesis	6			1	1			1	1	1	1	1	2	1	1	1	1	1	1	1	1			1	1	33
858	BP	GO:0048332	mesoderm morphogenesis	5									1	1					1	1	1	1							72
859	BP	GO:0060323	head morphogenesis	4									1	1															40
860	BP	GO:0060325	face morphogenesis	4									1	1															34
861	BP	GO:0001913	T cell mediated cytotoxicity	3			1	1	1	1											1	1							31
862	BP	GO:0042267	natural killer cell mediated cytotoxicity	3			1	2					1	1	1	2									1	2			58
863	BP	GO:0007610	behavior	2	1	8	1	5	1	5	1	8	1	5	1	7	1	3	1	5	1	7	1	6	1	8	1	5	770
864	BP	GO:0002209	behavioral defense response	3			1	2							1	2									1	3			36
865	BP	GO:0007626	locomotory behavior	3	1	2	1	1	1	1	1	1			1	1			1	2	1	1	1	2					206
866	BP	GO:0007631	feeding behavior	3	1	1					1	1															1	1	112
867	BP	GO:0042755	eating behavior	4	1	1																					1	1	31
868	BP	GO:0044708	single-organism behavior	3	1	4	1	3	1	4	1	3	1	3	1	5	1	1	1	4	1	5	1	5	1	6	1	2	446
869	BP	GO:0007625	grooming behavior	4					1	1			1	1									1	1					19
870	BP	GO:0035640	exploration behavior	4							1	1									1	1	1	1					26
871	BP	GO:0007638	mechanosensory behavior	4													1	1	1	1									12
872	BP	GO:0007622	rhythmic behavior	3	1	1																	1	1					48
873	BP	GO:0048512	circadian behavior	4	1	1																	1	1					47
874	BP	GO:0045475	locomotor rhythm	5	1	1																	1	1					14
875	BP	GO:0023052	signaling	2	5.07e-07	69	3.77e-22	87	6.39e-07	60	5.43e-16	87	3.28e-05	56	1.51e-23	100	1.86e-14	81	3.33e-12	78	9.73e-05	56	1.3e-14	76	8.86e-27	107	2.84e-05	59	6347
876	BP	GO:0044700	single organism signaling	3	4.74e-07	69	3.38e-22	87	6.01e-07	60	1.76e-15	86	8.09e-05	55	5.79e-23	99	1.69e-14	81	9.9e-12	77	0.000231	55	4.48e-14	75	7.75e-27	107	6.79e-05	58	6337
877	BP	GO:0065007	biological regulation	2	9.75e-63	192	7.39e-68	175	1.13e-65	172	2.64e-52	179	1.56e-45	150	1.95e-65	195	2.56e-51	171	4.11e-54	177	2.39e-46	154	4.82e-48	156	1.35e-76	211	9.31e-44	155	11489
878	BP	GO:0065009	regulation of molecular function	3	1.59e-08	45	2.51e-08	40	1.15e-06	37	5.67e-07	42	0.289	26	0.000223	37	0.00331	33	0.541	28	0.174	27	2.74e-09	42	4.76e-14	55	0.816	26	2862
879	BP	GO:0044093	positive regulation of molecular function	4	0.00363	26	0.000111	26	0.0169	22	0.645	21	0.0552	21	0.0113	25	0.844	20	1	19	0.69	19	0.0251	22	5.4e-05	30	1	18	1830
880	BP	GO:0044092	negative regulation of molecular function	4	0.116	17	0.706	14	0.00275	18	0.00828	19	1	12	1	13	0.194	16	1	13	1	9	0.000189	20	0.000994	21	1	13	1130
881	BP	GO:0051098	regulation of binding	4	1	3	0.000827	10	1	6	1	4	0.483	7	1	6	1	5	1	2	1	5	1	4	0.227	8	1	3	282
882	BP	GO:0035561	regulation of chromatin binding	5					1	1															1	1			15
883	BP	GO:1904432	regulation of ferrous iron binding	5			1	1	1	1											1	1							2
884	BP	GO:1902415	regulation of mRNA binding	5							1	1											1	1					3
885	BP	GO:1904573	regulation of selenocysteine insertion sequence binding	6							1	1											1	1					1
886	BP	GO:1904424	regulation of GTP binding	5	1	1							1	1			1	1							1	1			5
887	BP	GO:0051101	regulation of DNA binding	5			1	3	1	2			1	3	1	3	1	3	1	2	1	3	1	2	1	3	1	2	91
888	BP	GO:2000677	regulation of transcription regulatory region DNA binding	6																	1	1					1	1	34
889	BP	GO:0043393	regulation of protein binding	5	1	3	0.201	6	1	3	1	3	1	3	1	3	1	2			1	2	1	1	1	4	1	1	168
890	BP	GO:0033341	regulation of collagen binding	6							1	1															1	1	2
891	BP	GO:1900120	regulation of receptor binding	6			1	2	1	1											1	1							17
892	BP	GO:1904435	regulation of transferrin receptor binding	7			1	1	1	1											1	1							2
893	BP	GO:0043496	regulation of protein homodimerization activity	6	1	1			1	1			1	1											1	1			21
894	BP	GO:0043497	regulation of protein heterodimerization activity	6			1	1							1	1							1	1					8
895	BP	GO:0051100	negative regulation of binding	5	1	2	0.542	5	0.0418	6	1	2	1	3	1	1	1	1			1	3	1	2	1	3	1	2	128
896	BP	GO:1904572	negative regulation of mRNA binding	6							1	1											1	1					1
897	BP	GO:1904574	negative regulation of selenocysteine insertion sequence binding	7							1	1											1	1					1
898	BP	GO:0032091	negative regulation of protein binding	6	1	2	0.711	4	1	3	1	1	1	2							1	2			1	1	1	1	74
899	BP	GO:0090074	negative regulation of protein homodimerization activity	7																					1	1			4
900	BP	GO:1900121	negative regulation of receptor binding	7			1	2	1	1											1	1							12
901	BP	GO:0033342	negative regulation of collagen binding	7							1	1															1	1	1
902	BP	GO:0035562	negative regulation of chromatin binding	6					1	1															1	1			8
903	BP	GO:0043392	negative regulation of DNA binding	6			1	1	1	2			1	1	1	1	1	1			1	1	1	1	1	1	1	1	47
904	BP	GO:0051099	positive regulation of binding	5	1	2	0.04	6	1	2	1	1	1	3	1	3	1	3	1	2	1	3	1	1	0.992	5	1	1	126
905	BP	GO:1904434	positive regulation of ferrous iron binding	6			1	1	1	1											1	1							2
906	BP	GO:0043388	positive regulation of DNA binding	6			1	2					1	2	1	2	1	2	1	2	1	2	1	1	1	2	1	1	39
907	BP	GO:2000679	positive regulation of transcription regulatory region DNA binding	7																	1	1					1	1	14
908	BP	GO:0032092	positive regulation of protein binding	6	1	2	1	2	1	2	1	1	1	1	1	1	1	1			1	1			1	3			75
909	BP	GO:0090073	positive regulation of protein homodimerization activity	7	1	1			1	1			1	1															9
910	BP	GO:1900122	positive regulation of receptor binding	7			1	1	1	1											1	1							6
911	BP	GO:1904437	positive regulation of transferrin receptor binding	8			1	1	1	1											1	1							2
912	BP	GO:0040030	regulation of molecular function, epigenetic	4	1	1																							1
913	BP	GO:0065008	regulation of biological quality	3	1.64e-14	62	5.23e-26	71	2.79e-14	55	2.54e-08	51	1e-11	51	2.08e-18	68	7.07e-21	69	3.34e-14	60	1.43e-10	50	5.11e-20	64	1.58e-27	82	3.02e-12	54	3631
914	BP	GO:0090066	regulation of anatomical structure size	4	1	2	0.526	9	1	5	1	7	1	2	7.21e-06	16	1	7	1	8	1	5	5.37e-05	14	1.94e-07	18	1	4	484
915	BP	GO:0035150	regulation of tube size	5	1	1			1	1	1	2			1	1	1	2	1	2	1	3			1	1			152
916	BP	GO:0051235	maintenance of location	4	1	6	1	5			1	6	1	3	1	4	0.904	7	1	3	1	2	0.0791	8	1	4	1	5	286
917	BP	GO:0051238	sequestering of metal ion	5	1	3	1	1			1	1	1	2			1	2			1	1	1	2			1	3	119
918	BP	GO:0045185	maintenance of protein location	5	1	1	1	4			1	3			1	3	0.198	5	1	3	1	1	0.00884	6	1	3	1	2	96
919	BP	GO:0019915	lipid storage	5	1	2					1	2	1	1	1	1									1	1			62
920	BP	GO:0042391	regulation of membrane potential	4	1	4	1	2	1	6	1	4	1	2	1	6	1	6	1	5	1	6	1	3	1	6	1	4	358
921	BP	GO:0086036	regulation of cardiac muscle cell membrane potential	5					1	1																			9
922	BP	GO:0045837	negative regulation of membrane potential	5	1	1			1	1					1	1									1	1			6
923	BP	GO:0060081	membrane hyperpolarization	5																					1	1			12
924	BP	GO:0051899	membrane depolarization	5	1	1	1	2	1	1			1	1	1	1	1	1			1	2							93
925	BP	GO:0001508	action potential	5	1	1			1	2	1	2	1	1			1	4	1	2	1	2	1	1	1	2	1	3	123
926	BP	GO:0086001	cardiac muscle cell action potential	6	1	1			1	1	1	2					0.153	4	1	2	1	1	1	1	1	1	1	2	47
927	BP	GO:0060078	regulation of postsynaptic membrane potential	5							1	1											1	1	1	1			69
928	BP	GO:0051881	regulation of mitochondrial membrane potential	5	1	2	1	1	1	3	1	1	1	1	0.351	4	1	2	1	3	1	2	1	1	1	2	1	1	56
929	BP	GO:0010917	negative regulation of mitochondrial membrane potential	6	1	1			1	1					1	1									1	1			4
930	BP	GO:0051882	mitochondrial depolarization	6			1	1					1	1	1	1	1	1											22
931	BP	GO:0050803	regulation of synapse structure or activity	4			1	3	1	1	1	2	1	1	1	6	1	1	1	3	1	2	1	1	1	4	1	1	238
932	BP	GO:0031647	regulation of protein stability	4	1	4	0.733	6	0.0805	7	1	5	1	5	1	4	1	5	1	2	1	4	1	4	1	5	0.0122	8	213
933	BP	GO:0050821	protein stabilization	5	1	2	1	3	0.522	5	1	3	1	3	1	2	1	3	1	1	1	4	1	2	1	3	0.0559	6	128
934	BP	GO:0031648	protein destabilization	5			1	2	1	1	1	2	1	2	1	1	1	1									1	2	34
935	BP	GO:0001505	regulation of neurotransmitter levels	4	1	1			1	2	1	1			1	1	1	1			1	2	1	1	1	4	1	1	181
936	BP	GO:0042592	homeostatic process	4	2.18e-05	28	0.00236	22	0.00206	22	0.311	20	0.000518	23	1	16	2.25e-05	27	0.579	19	2.53e-06	27	1.15e-05	26	0.0217	23	0.216	19	1605
937	BP	GO:0060249	anatomical structure homeostasis	5	0.00618	11	0.461	8	0.00952	10	0.217	9	0.00123	11	1	6	1	6	1	6	0.00018	12	1	6	1	7	0.016	10	373
938	BP	GO:0048878	chemical homeostasis	5	1	13	1	12	1	12	1	10	0.863	13	1	5	0.0154	17	1	13	0.00433	17	0.000191	19	1	11	1	10	1022
939	BP	GO:0033483	gas homeostasis	6					1	2	1	1							1	1	1	2							9
940	BP	GO:0032364	oxygen homeostasis	7					1	1	1	1							1	1	1	1							6
941	BP	GO:0033484	nitric oxide homeostasis	7					1	1											1	1							3
942	BP	GO:0055088	lipid homeostasis	6			1	4	1	1	1	1	1	1			1	1	1	1	1	4	1	2	1	1	1	1	125
943	BP	GO:0055092	sterol homeostasis	7			1	1													1	2	1	1	1	1			74
944	BP	GO:0042632	cholesterol homeostasis	8			1	1													1	2	1	1	1	1			74
945	BP	GO:0030104	water homeostasis	6			1	1	1	1			1	1			1	1	1	1			1	1	1	1			67
946	BP	GO:0033500	carbohydrate homeostasis	6	1	6	1	1	1	2	1	4	1	3	1	4	1	3	1	4	1	1	1	5	1	3			230
947	BP	GO:0042593	glucose homeostasis	7	1	6	1	1	1	2	1	4	1	3	1	4	1	3	1	4	1	1	1	5	1	3			230
948	BP	GO:0050801	ion homeostasis	6	1	7	1	5	1	7	1	4	1	8	1	1	0.2	12	1	7	0.0852	12	0.39	11	1	6	1	9	679
949	BP	GO:0098771	inorganic ion homeostasis	7	1	6	1	5	1	7	1	4	1	8	1	1	0.368	11	1	7	0.034	12	0.171	11	1	6	1	9	618
950	BP	GO:0055080	cation homeostasis	7	1	6	1	5	1	7	1	3	1	8	1	1	0.302	11	1	7	0.14	11	0.657	10	1	5	1	8	604
951	BP	GO:0072507	divalent inorganic cation homeostasis	8	1	4	1	2	1	2	1	1	1	3			1	7	1	3	1	5	1	6	1	2	1	5	402
952	BP	GO:0055067	monovalent inorganic cation homeostasis	8	1	1			1	2	1	1	1	1			1	2	1	1	1	3	1	2	1	3	1	2	124
953	BP	GO:0006885	regulation of pH	9	1	1			1	2			1	1			1	2	1	1	1	2	1	1	1	1	1	2	71
954	BP	GO:0045851	pH reduction	10					1	1			1	1			1	1	1	1	1	1			1	1	1	1	34
955	BP	GO:0055065	metal ion homeostasis	8	1	5	1	5	1	5	1	3	1	7	1	1	1	9	1	6	1	9	1	9	1	5	1	6	555
956	BP	GO:0055076	transition metal ion homeostasis	9	1	1	1	3	1	3	1	1	1	4	1	1	1	2	1	3	1	3	1	2	1	1	1	2	138
957	BP	GO:0055070	copper ion homeostasis	10			1	1	1	1					1	1													17
958	BP	GO:0055072	iron ion homeostasis	10	1	1	1	2	1	2	1	1	1	4			1	2	1	3	1	3	1	2	1	1	1	1	98
959	BP	GO:0055069	zinc ion homeostasis	10																							1	1	23
960	BP	GO:0055078	sodium ion homeostasis	9							1	1									1	1	1	1	1	2			54
961	BP	GO:0055074	calcium ion homeostasis	9	1	4	1	2	1	2	1	1	1	3			1	7	1	3	1	5	1	6	1	2	1	4	375
962	BP	GO:0055075	potassium ion homeostasis	9																					1	1			18
963	BP	GO:0055081	anion homeostasis	7							1	1									1	1	1	1	1	1	1	1	44
964	BP	GO:0072505	divalent inorganic anion homeostasis	8							1	1									1	1	1	1	1	1	1	1	13
965	BP	GO:0055083	monovalent inorganic anion homeostasis	8							1	1									1	1	1	1	1	1	1	1	20
966	BP	GO:0072506	trivalent inorganic anion homeostasis	8							1	1									1	1	1	1	1	1	1	1	12
967	BP	GO:0055062	phosphate ion homeostasis	9							1	1									1	1	1	1	1	1	1	1	12
968	BP	GO:0048872	homeostasis of number of cells	5	1	5	1	2	1	2	1	4	1	4	1	2	1	5	1	2	1	3	1	1	1	1	1	1	238
969	BP	GO:0061484	hematopoietic stem cell homeostasis	6	1	1					1	1			1	1									1	1			5
970	BP	GO:0001776	leukocyte homeostasis	6			1	1					1	1			1	2											85
971	BP	GO:0002260	lymphocyte homeostasis	7			1	1									1	1											68
972	BP	GO:0001782	B cell homeostasis	8			1	1									1	1											31
973	BP	GO:0002262	myeloid cell homeostasis	6	0.952	5	1	1	1	2	1	4	1	3	1	1	1	4	1	2	1	2	1	1			1	1	129
974	BP	GO:0034101	erythrocyte homeostasis	7	0.384	5	1	1	1	2	1	4	1	2	1	1	1	3	1	2	1	2	1	1			1	1	106
975	BP	GO:0001780	neutrophil homeostasis	7									1	1			1	1											12
976	BP	GO:0050878	regulation of body fluid levels	4	1	5	6.82e-07	19	1	9	1	8	1	8	1.27e-05	19	1	7	1	9	1	4	6.25e-06	18	2.17e-05	19	1	9	732
977	BP	GO:0007599	hemostasis	5	1	4	1.12e-07	18	1	8	1	7	1	6	0.000513	15	1	6	1	8	1	4	0.0175	12	2.15e-05	17	1	9	578
978	BP	GO:0007589	body fluid secretion	5	1	1	1	1	1	1	1	1	1	2	1	4	1	1	1	1			0.176	5	1	2			100
979	BP	GO:0010817	regulation of hormone levels	4	1	8	1	6	1	4	1	3	1	5	1	4	1	7	1	8	1	5	1	3	1	9	1	4	507
980	BP	GO:0042445	hormone metabolic process	5			1	4			1	1	1	1	1	1			1	1	1	3	1	2	1	4			193
981	BP	GO:0042446	hormone biosynthetic process	6			1	2											1	1					1	2			66
982	BP	GO:0009914	hormone transport	5	0.631	8	1	2	1	4	1	2	1	5	1	3	1	7	1	7	1	2	1	1	1	5	1	4	339
983	BP	GO:0090559	regulation of membrane permeability	4	1	3	1	3	1	1	1	2			1	2	1	1	1	2	1	1	1	3	1	1			70
984	BP	GO:0061635	regulation of protein complex stability	4					1	1									1	1									6
985	BP	GO:0040007	growth	2	1	13	0.00273	17	0.00244	17	1	13	1	10	0.00682	18	1	12	0.226	15	0.0628	15	0.0628	15	0.00269	19	0.0246	16	1004
986	BP	GO:0048589	developmental growth	3	1	3	0.649	10	1	9	1	8	1	5	0.126	12	1	7	1	10	1	7	0.72	10	0.00156	15	1	8	611
987	BP	GO:0060560	developmental growth involved in morphogenesis	4			1	3	1	2	1	2	1	1	1	4	1	2	1	3	1	2	1	3	0.293	7	1	1	219
988	BP	GO:0003401	axis elongation	5																					1	1			34
989	BP	GO:0042246	tissue regeneration	4	1	1	1	1			1	1	1	1	1	1			1	1			1	1	1	2	1	1	60
990	BP	GO:0043403	skeletal muscle tissue regeneration	5	1	1							1	1	1	1			1	1			1	1	1	2			33
991	BP	GO:0032501	multicellular organismal process	2	9.3e-19	99	3.21e-32	107	3.16e-16	83	3.65e-20	101	8.24e-09	69	1.68e-20	102	7.49e-19	95	1.4e-18	96	1.45e-09	72	5.88e-19	89	3.43e-27	115	6.05e-17	88	7212
992	BP	GO:0003008	system process	3	1	7	1	16	1	16	1	15	1	7	1	15	1	11	1	16	1	18	1	14	0.00666	28	1	12	2065
993	BP	GO:0050886	endocrine process	4									1	1															88
994	BP	GO:0003012	muscle system process	4	1	2	0.12	9	0.0168	10	1	4	1	3	1	6	1	6	1	8	0.772	8	0.772	8	6.04e-06	15	0.0281	10	398
995	BP	GO:0043500	muscle adaptation	5			1	2	1	2	1	1	1	1	1	1			1	1	1	2	1	2	1	2	1	4	88
996	BP	GO:0014888	striated muscle adaptation	6			1	1	1	2	1	1									1	1					1	2	42
997	BP	GO:0043501	skeletal muscle adaptation	7					1	2	1	1									1	1					1	1	26
998	BP	GO:0014889	muscle atrophy	6			1	1															1	1			1	1	13
999	BP	GO:0014891	striated muscle atrophy	7			1	1																			1	1	9
1000	BP	GO:0090075	relaxation of muscle	5					1	1	1	1													1	2			29
1001	BP	GO:0055119	relaxation of cardiac muscle	6					1	1	1	1													1	1			16
1002	BP	GO:0044557	relaxation of smooth muscle	6																					1	1			10
1003	BP	GO:0014896	muscle hypertrophy	5			1	2	1	1			1	1	1	2			1	1	1	1	1	1	1	3	1	2	63
1004	BP	GO:0003298	physiological muscle hypertrophy	6			1	1					1	1	1	1									1	1	1	1	17
1005	BP	GO:0014897	striated muscle hypertrophy	6			1	2	1	1			1	1	1	2			1	1	1	1	1	1	1	3	1	2	61
1006	BP	GO:0003300	cardiac muscle hypertrophy	7			1	2	1	1			1	1	1	2			1	1	1	1	1	1	1	3	1	2	59
1007	BP	GO:0006936	muscle contraction	5	1	2	1	6	0.18	8	1	3	1	2	1	4	1	6	1	7	1	6	1	6	0.00032	12	1	6	328
1008	BP	GO:0006941	striated muscle contraction	6	1	1	1	2	1	3	1	3	1	1	1	1	1	5	1	4	1	3	1	1	1	3	1	4	150
1009	BP	GO:0006939	smooth muscle contraction	6			1	1							1	1							1	1	1	2	1	1	102
1010	BP	GO:0003014	renal system process	4			1	2	1	1	1	2	1	1			1	1	1	1	1	2	1	2	1	4	1	2	117
1011	BP	GO:0070293	renal absorption	5			1	2			1	1									1	1	1	1	1	2	1	2	17
1012	BP	GO:0097291	renal phosphate ion absorption	6							1	1									1	1	1	1	1	1	1	1	1
1013	BP	GO:0097017	renal protein absorption	6			1	1																			1	1	3
1014	BP	GO:0007588	excretion	4							1	3									1	2	1	2	1	2	1	1	74
1015	BP	GO:0035812	renal sodium excretion	5							1	1									1	1	1	1	1	1			24
1016	BP	GO:0050877	neurological system process	4	1	4	1	3	1	5	1	7	1	1	1	5	1	3	1	6	1	6	1	4	1	9	1	1	1347
1017	BP	GO:0007600	sensory perception	5	1	2	1	1	1	2	1	4			1	1	1	3	1	3	1	2	1	3	1	6	1	1	995
1018	BP	GO:0007606	sensory perception of chemical stimulus	6					1	1							1	2	1	1									546
1019	BP	GO:0007608	sensory perception of smell	7					1	1							1	1											476
1020	BP	GO:0050909	sensory perception of taste	7													1	1	1	1									65
1021	BP	GO:0019233	sensory perception of pain	6							1	1							1	1	1	1	1	1	1	3			105
1022	BP	GO:0050951	sensory perception of temperature stimulus	6																					1	1			21
1023	BP	GO:0050954	sensory perception of mechanical stimulus	6	1	1	1	1	1	1	1	2			1	1	1	1	1	1	1	1	1	2	1	4	1	1	164
1024	BP	GO:0007605	sensory perception of sound	7	1	1	1	1	1	1	1	2			1	1	1	1	1	1	1	1	1	2	1	3	1	1	147
1025	BP	GO:0050953	sensory perception of light stimulus	6	1	1					1	1																	215
1026	BP	GO:0007601	visual perception	7	1	1					1	1																	212
1027	BP	GO:0050906	detection of stimulus involved in sensory perception	6																					1	1			546
1028	BP	GO:0050961	detection of temperature stimulus involved in sensory perception	6																					1	1			14
1029	BP	GO:0050965	detection of temperature stimulus involved in sensory perception of pain	7																					1	1			14
1030	BP	GO:0050974	detection of mechanical stimulus involved in sensory perception	6																					1	1			30
1031	BP	GO:0050966	detection of mechanical stimulus involved in sensory perception of pain	7																					1	1			9
1032	BP	GO:0050890	cognition	5	1	2	1	1	1	2	1	3	1	1	1	3	1	1	1	1	1	4	1	2	1	4			274
1033	BP	GO:0050905	neuromuscular process	5			1	1	1	1					1	1			1	1					1	1			114
1034	BP	GO:0050885	neuromuscular process controlling balance	6			1	1																	1	1			61
1035	BP	GO:0003013	circulatory system process	4	1	4	1	3	1	6	1	7	1	1	1	4	1	7	1	7	1	8	1	2	1	4	1	5	521
1036	BP	GO:0003015	heart process	5	1	3	1	3	1	3	1	4	1	1	1	3	1	5	1	4	1	3	1	2	1	4	1	4	265
1037	BP	GO:0003018	vascular process in circulatory system	5	1	1			1	2	1	3			1	1	1	2	1	2	1	3			1	1			175
1038	BP	GO:0008015	blood circulation	5	1	4	1	3	1	6	1	7	1	1	1	4	1	7	1	7	1	8	1	2	1	4	1	5	518
1039	BP	GO:0060047	heart contraction	6	1	3	1	3	1	3	1	4	1	1	1	3	1	5	1	4	1	3	1	2	1	4	1	4	263
1040	BP	GO:0060048	cardiac muscle contraction	7	1	1	1	1	1	3	1	3	1	1	1	1	0.445	5	1	4	1	3	1	1	1	2	1	4	114
1041	BP	GO:0008217	regulation of blood pressure	6					1	1	1	1							1	1	1	2			1	1			179
1042	BP	GO:0045776	negative regulation of blood pressure	7					1	1	1	1							1	1	1	1							45
1043	BP	GO:0003073	regulation of systemic arterial blood pressure	7					1	1	1	1							1	1	1	1							91
1044	BP	GO:0003044	regulation of systemic arterial blood pressure mediated by a chemical signal	8					1	1	1	1							1	1	1	1							50
1045	BP	GO:0003085	negative regulation of systemic arterial blood pressure	8					1	1	1	1							1	1	1	1							15
1046	BP	GO:0001976	neurological system process involved in regulation of systemic arterial blood pressure	8					1	1	1	1							1	1	1	1							18
1047	BP	GO:0003070	regulation of systemic arterial blood pressure by neurotransmitter	9					1	1	1	1							1	1	1	1							1
1048	BP	GO:0003068	regulation of systemic arterial blood pressure by acetylcholine	10					1	1	1	1							1	1	1	1							1
1049	BP	GO:0043114	regulation of vascular permeability	6					1	1	1	1																	31
1050	BP	GO:0043116	negative regulation of vascular permeability	7							1	1																	9
1051	BP	GO:0043117	positive regulation of vascular permeability	7							1	1																	12
1052	BP	GO:0050880	regulation of blood vessel size	6	1	1			1	1	1	2			1	1	1	2	1	2	1	3			1	1			151
1053	BP	GO:0042311	vasodilation	7	1	1			1	1	1	2			1	1	1	1	1	2	1	3			1	1			74
1054	BP	GO:0003069	vasodilation by acetylcholine involved in regulation of systemic arterial blood pressure	8					1	1	1	1							1	1	1	1							1
1055	BP	GO:0044707	single-multicellular organism process	3	2.71e-21	95	4.87e-35	103	4.59e-16	76	3.66e-22	96	1.9e-10	66	7.88e-24	99	1.82e-22	93	5.83e-21	92	2.73e-10	67	5.97e-21	85	1.5e-30	111	6.48e-19	84	6175
1056	BP	GO:0050879	multicellular organismal movement	4	1	1	1	1			1	2													1	1			50
1057	BP	GO:0050881	musculoskeletal movement	5	1	1	1	1			1	2													1	1			50
1058	BP	GO:0050882	voluntary musculoskeletal movement	6	1	1					0.476	2																	5
1059	BP	GO:0003009	skeletal muscle contraction	6			1	1																	1	1			39
1060	BP	GO:0090130	tissue migration	4	1	5	1	5	1	1	1	3	1	6	1	5	1	3	1	5	1	2	1	3	0.375	7	1	4	228
1061	BP	GO:0090132	epithelium migration	5	1	5	1	4	1	1	1	3	0.932	6	1	4	1	3	1	4	1	2	1	3	1	6	1	4	223
1062	BP	GO:0042303	molting cycle	4	1	3	1	3	1	3	1	1	1	2	1	2	1	1	1	1	1	2	1	1	1	3	1	1	109
1063	BP	GO:0042633	hair cycle	5	1	3	1	3	1	3	1	1	1	2	1	2	1	1	1	1	1	2	1	1	1	3	1	1	109
1064	BP	GO:0035637	multicellular organismal signaling	4	1	2			1	1	1	3					1	4	1	2	1	1	1	1	1	2	1	2	189
1065	BP	GO:0022404	molting cycle process	4	1	3	1	3	1	2	1	1	1	1	1	2	1	1	1	1	1	1	1	1	1	3	1	1	88
1066	BP	GO:0022405	hair cycle process	5	1	3	1	3	1	2	1	1	1	1	1	2	1	1	1	1	1	1	1	1	1	3	1	1	88
1067	BP	GO:0032941	secretion by tissue	4	1	1			1	1	1	1	1	1	1	3							0.106	5	1	1			90
1068	BP	GO:0030431	sleep	4											1	1							1	1					38
1069	BP	GO:0001503	ossification	4	1.79e-06	15	1	5	0.000152	12	0.23	9	1	7	1	6	7.74e-08	16	9.7e-06	14	0.000196	12	1	7	1	4	0.000296	12	376
1070	BP	GO:0036075	replacement ossification	5					1	1							1	1											29
1071	BP	GO:0050817	coagulation	4	1	4	1.15e-07	18	1	8	1	8	1	6	8.7e-05	16	1	6	1	8	1	4	0.00304	13	2.2e-05	17	1	9	579
1072	BP	GO:0007596	blood coagulation	5	1	4	9.73e-08	18	1	8	1	7	1	6	0.00046	15	1	6	1	8	1	4	0.016	12	1.89e-05	17	1	9	573
1073	BP	GO:0097242	beta-amyloid clearance	4	1	1	1	1																					7
1074	BP	GO:0001816	cytokine production	4	1	8	1	4	1	8	1	10	1	4	1	7	1	9	1	6	1	3	1	5	1	7	1	6	647
1075	BP	GO:0071604	transforming growth factor beta production	5					1	1	1	1							1	1							1	2	27
1076	BP	GO:0032905	transforming growth factor beta1 production	6					1	1	1	1							1	1							1	2	9
1077	BP	GO:0032604	granulocyte macrophage colony-stimulating factor production	5											1	1							1	1					15
1078	BP	GO:0032612	interleukin-1 production	5			1	1	1	1			1	1			1	2					1	1	1	3			68
1079	BP	GO:0032610	interleukin-1 alpha production	6																					1	1			8
1080	BP	GO:0032611	interleukin-1 beta production	6			1	1					1	1			1	2					1	1	1	2			58
1081	BP	GO:0071706	tumor necrosis factor superfamily cytokine production	5			1	1	1	2			1	1			1	1	1	1					1	1	1	1	107
1082	BP	GO:0032640	tumor necrosis factor production	6			1	1	1	2			1	1			1	1	1	1					1	1	1	1	102
1083	BP	GO:0032635	interleukin-6 production	5	1	1			1	1	1	1	1	1			1	2	1	1	1	1					1	1	110
1084	BP	GO:0032620	interleukin-17 production	5											1	1							1	1					26
1085	BP	GO:0032609	interferon-gamma production	5	1	1			1	1	1	1	1	1	1	1	1	2	1	1	1	1	1	1			1	1	105
1086	BP	GO:0032637	interleukin-8 production	5					1	1	1	1			1	2	1	1	1	1			1	1	1	1			67
1087	BP	GO:0032616	interleukin-13 production	5											1	1							1	1					20
1088	BP	GO:0032623	interleukin-2 production	5											1	1							1	1	1	1			60
1089	BP	GO:0032615	interleukin-12 production	5	1	1			1	2	1	2	1	1			1	2	1	2	1	1					1	2	55
1090	BP	GO:0032606	type I interferon production	5	0.00723	7	1	1	1	4	0.00692	7	1	4	1	3	0.0671	6	1	3	1	1	1	2	1	2	1	3	127
1091	BP	GO:0032607	interferon-alpha production	6	1	1			1	1	1	1	1	1			1	2	1	1	1	1			1	1	1	1	21
1092	BP	GO:0032608	interferon-beta production	6	1	2					1	1	1	2	1	1	1	3	1	1			1	1	1	1			48
1093	BP	GO:0032602	chemokine production	5			1	1							1	2	1	2	1	1			1	2					73
1094	BP	GO:0072567	chemokine (C-X-C motif) ligand 2 production	6			1	1									1	1											10
1095	BP	GO:0071609	chemokine (C-C motif) ligand 5 production	6											1	1	1	1	1	1			1	1					7
1096	BP	GO:0032613	interleukin-10 production	5	1	1			1	1	1	1	1	1			1	2	1	1	1	1					1	1	44
1097	BP	GO:0002367	cytokine production involved in immune response	5	1	2	1	2	1	2	1	1					1	3	1	1	1	3					1	2	70
1098	BP	GO:0061082	myeloid leukocyte cytokine production	6			1	1									1	1											22
1099	BP	GO:0002369	T cell cytokine production	6	1	1	1	1	1	1							1	1			1	2					1	1	25
1100	BP	GO:0035743	CD4-positive, alpha-beta T cell cytokine production	7	1	1											1	1			1	1					1	1	9
1101	BP	GO:0002368	B cell cytokine production	6	1	1			1	1	1	1					1	1	1	1	1	1					1	1	2
1102	BP	GO:0042089	cytokine biosynthetic process	5			1	1	1	1	1	1			1	1			1	1			1	1	1	2	1	1	113
1103	BP	GO:0042533	tumor necrosis factor biosynthetic process	6			1	1	1	1									1	1					1	1	1	1	19
1104	BP	GO:0042090	interleukin-12 biosynthetic process	6							1	1																	10
1105	BP	GO:0042095	interferon-gamma biosynthetic process	6											1	1							1	1					17
1106	BP	GO:0042231	interleukin-13 biosynthetic process	6											1	1							1	1					2
1107	BP	GO:0042033	chemokine biosynthetic process	6											1	1							1	1					14
1108	BP	GO:0042253	granulocyte macrophage colony-stimulating factor biosynthetic process	6											1	1							1	1					5
1109	BP	GO:0042094	interleukin-2 biosynthetic process	6											1	1							1	1	1	1			22
1110	BP	GO:0048771	tissue remodeling	4					1	1			1	3	1	1	1	2	1	2	1	2	1	3	1	2	1	2	153
1111	BP	GO:0046849	bone remodeling	5					1	1			1	2			1	1	1	2	1	2	1	1			1	2	79
1112	BP	GO:0097350	neutrophil clearance	5									1	1			1	1											2
1113	BP	GO:0007585	respiratory gaseous exchange	4	1	1																							67
1114	BP	GO:0007586	digestion	4			1	2					1	1	1	2					1	1	1	1	1	4			172
1115	BP	GO:0022600	digestive system process	5			1	2					1	1	1	2					1	1	1	1	1	4			96
1116	BP	GO:0043133	hindgut contraction	6																					1	1			3
1117	BP	GO:0030157	pancreatic juice secretion	6											1	1									1	1			15
1118	BP	GO:0044241	lipid digestion	5			1	1													1	1	1	1	1	1			28
1119	BP	GO:0044236	multicellular organismal metabolic process	4	1	1	1	1	1	1			1	1			1	1	1	1	1	2			1	2			146
1120	BP	GO:0044243	multicellular organismal catabolic process	5	1	1							1	1			1	1	1	1	1	1			1	1			86
1121	BP	GO:0044259	multicellular organismal macromolecule metabolic process	5	1	1	1	1	1	1			1	1			1	1	1	1	1	2			1	2			130
1122	BP	GO:0032963	collagen metabolic process	6	1	1			1	1			1	1			1	1	1	1	1	2			1	1			124
1123	BP	GO:0030574	collagen catabolic process	7	1	1							1	1			1	1	1	1	1	1			1	1			79
1124	BP	GO:0032964	collagen biosynthetic process	7					1	1																			39
1125	BP	GO:0030534	adult behavior	4	1	1	1	1	1	1					1	1			1	1	1	1	1	1	1	1	1	1	150
1126	BP	GO:0008344	adult locomotory behavior	5	1	1	1	1							1	1			1	1			1	1					89
1127	BP	GO:0048149	behavioral response to ethanol	5					1	1																			10
1128	BP	GO:0048148	behavioral response to cocaine	5																	1	1			1	1	1	1	15
1129	BP	GO:0007275	multicellular organismal development	4	7.91e-14	73	1.02e-24	81	1.85e-09	57	5.34e-14	73	1.88e-06	51	1.52e-15	76	8.81e-17	75	2.37e-14	72	5.46e-06	51	2.97e-15	68	2.56e-21	87	3.11e-10	61	5038
1130	BP	GO:0048731	system development	5	2.19e-11	64	4.97e-22	73	9.58e-09	52	4.42e-12	65	0.00474	40	1.73e-12	66	1.33e-10	60	1.43e-08	57	7.53e-05	45	4.79e-14	62	6.04e-17	75	4.52e-07	51	4482
1131	BP	GO:0061008	hepaticobiliary system development	6	1	3	1	2	1	3	1	4	1	1	1	2	1	1	1	2	1	3	1	2	1	2	1	2	151
1132	BP	GO:0001655	urogenital system development	6	1	2	1	2	1	1	1	3	1	1	1	3	1	3	1	2	1	3	1	2	1	2	1	4	334
1133	BP	GO:0055123	digestive system development	6	1	2	1	2	1	1	1	2	1	1											1	1	1	1	160
1134	BP	GO:0035272	exocrine system development	6	1	1	1	1							1	1							1	1					56
1135	BP	GO:0035270	endocrine system development	6	1	1							1	1			1	1	1	1	1	1	1	1			1	1	153
1136	BP	GO:0061458	reproductive system development	6	1	5	1	6	1	2	1	7	1	4	1	3	1	7	1	5	1	2	1	3	1	3	1	6	461
1137	BP	GO:0007399	nervous system development	6	0.0631	28	1.01e-12	43	0.996	22	0.000292	33	0.0501	25	9.18e-10	43	0.00239	30	3.94e-05	34	1	17	0.000274	30	4.32e-13	49	0.973	23	2418
1138	BP	GO:0021675	nerve development	7			1	1			1	2									1	1	1	2			1	1	72
1139	BP	GO:0021545	cranial nerve development	8							1	1											1	1					44
1140	BP	GO:0021559	trigeminal nerve development	9							1	1																	9
1141	BP	GO:0021554	optic nerve development	9																			1	1					10
1142	BP	GO:0021602	cranial nerve morphogenesis	9							1	1																	24
1143	BP	GO:0021603	cranial nerve formation	10							1	1																	5
1144	BP	GO:0048513	animal organ development	6	2.12e-06	44	3.76e-09	44	0.000259	35	5.4e-06	43	1	26	0.00906	36	8.67e-05	39	5.8e-06	42	0.00419	33	4.73e-06	39	5.3e-05	42	0.17	30	3212
1145	BP	GO:0007423	sensory organ development	7	1	5	1	1	1	5	1	3	1	3	1	1	1	7	1	5	1	4	1	4	1	2	1	4	545
1146	BP	GO:0001654	eye development	8	1	5			1	5	1	2	1	2	1	1	1	5	1	3	1	3	1	2	1	1	1	3	360
1147	BP	GO:0043010	camera-type eye development	9	1	4			1	5	1	2	1	1	1	1	1	3	1	3	1	2	1	1	1	1	1	2	314
1148	BP	GO:0060041	retina development in camera-type eye	10	1	2			1	1	1	1					1	1	1	1			1	1	1	1			151
1149	BP	GO:0003407	neural retina development	11	1	1			1	1	1	1													1	1			59
1150	BP	GO:0002088	lens development in camera-type eye	10					1	1			1	1	1	1	1	1	1	1	1	1					1	1	72
1151	BP	GO:0061029	eyelid development in camera-type eye	10					1	1	1	1																	13
1152	BP	GO:0043586	tongue development	8					1	1																			21
1153	BP	GO:0061196	fungiform papilla development	9					1	1																			6
1154	BP	GO:0043583	ear development	8			1	1			1	2	1	1			1	2	1	2	1	1	1	2	1	1	1	1	218
1155	BP	GO:0048839	inner ear development	9			1	1			1	2	1	1			1	1			1	1	1	2	1	1	1	1	193
1156	BP	GO:0043588	skin development	7	1	3	1	6	1	2	1	2	1	1	1	2	1	3	1	1	1	3	1	3	1	6	1	3	255
1157	BP	GO:0098773	skin epidermis development	8	1	3	1	3	1	2	1	1	1	1	1	2	1	1	1	1	1	1	1	1	1	3	1	1	90
1158	BP	GO:0001942	hair follicle development	9	1	3	1	3	1	2	1	1	1	1	1	2	1	1	1	1	1	1	1	1	1	3	1	1	88
1159	BP	GO:0048820	hair follicle maturation	10															1	1	1	1							8
1160	BP	GO:0031069	hair follicle morphogenesis	10			1	1					1	1	1	1							1	1			1	1	30
1161	BP	GO:0060789	hair follicle placode formation	10			1	1	0.979	2					1	1	1	1					1	1					7
1162	BP	GO:0048732	gland development	7	1	7	1	3	1	7	1	7	1	3	1	5	1	4	1	4	1	5	3.93e-05	14	1	7	1	6	472
1163	BP	GO:0030879	mammary gland development	8	1	3			1	2	1	1	1	2	1	2	1	3	1	1	1	1	0.000604	8	1	4	1	2	148
1164	BP	GO:0061377	mammary gland lobule development	9					1	1							1	1									1	1	20
1165	BP	GO:0060749	mammary gland alveolus development	10					1	1							1	1									1	1	20
1166	BP	GO:0061180	mammary gland epithelium development	9	1	2			1	1			1	1			1	3	1	1	1	1	1	2	1	2	1	2	77
1167	BP	GO:0033598	mammary gland epithelial cell proliferation	10	1	1			1	1							1	1	1	1					1	1	1	1	30
1168	BP	GO:0007595	lactation	9	1	1			1	1	1	1	1	1	1	2							0.00384	5					46
1169	BP	GO:0030878	thyroid gland development	8															1	1									27
1170	BP	GO:0007431	salivary gland development	8	1	1	1	1							1	1							1	1					40
1171	BP	GO:0001889	liver development	8	1	3	1	2	1	3	1	4	1	1	1	2	1	1	1	2	1	3	1	2	1	2	1	2	148
1172	BP	GO:0048569	post-embryonic organ development	7	1	1			1	1																	1	1	20
1173	BP	GO:0007517	muscle organ development	7	0.197	9	1	6	1	5	1	8	1	6	1	5	1	7	1	7	1	6	1	4	0.00706	11	1	4	366
1174	BP	GO:0060538	skeletal muscle organ development	8	1	5	1	4	1	4	1	4	1	2	1	2	1	3	1	3	1	3	1	1	0.0923	7	1	1	182
1175	BP	GO:0007519	skeletal muscle tissue development	9	1	5	1	4	1	4	1	4	1	2	1	2	1	2	1	2	1	3	1	1	0.0598	7	1	1	170
1176	BP	GO:0048630	skeletal muscle tissue growth	10											1	1									1	1			10
1177	BP	GO:0031100	organ regeneration	7	1	1	1	4	1	1	1	2			0.128	5					1	1	1	1	1	3			84
1178	BP	GO:0097421	liver regeneration	8			1	1													1	1							16
1179	BP	GO:0031214	biomineral tissue development	7	1	1	1	1			1	2							1	2	1	1			1	1			136
1180	BP	GO:0030282	bone mineralization	8	1	1	1	1			1	2							1	2	1	1			1	1			103
1181	BP	GO:0060485	mesenchyme development	7			1	5	1	5	1	1	1	1	1	4	1	1	1	5			1	2	1	5	1	1	248
1182	BP	GO:0048339	paraxial mesoderm development	8					1	1															1	1			21
1183	BP	GO:0048368	lateral mesoderm development	8																					1	1			15
1184	BP	GO:0010260	organ senescence	7													1	1											3
1185	BP	GO:0009887	organ morphogenesis	7	1	9	1	5	1	6	1	9	1	2	1	5	1	10	1	10	1	6	1	7	1	9	1	7	965
1186	BP	GO:0090596	sensory organ morphogenesis	8	1	3			1	2	1	3	1	1			1	4	1	3	1	3	1	2	1	1	1	3	272
1187	BP	GO:0048592	eye morphogenesis	9	1	3			1	1	1	2	1	1			1	2	1	1	1	2	1	1			1	2	157
1188	BP	GO:0048593	camera-type eye morphogenesis	10	1	2			1	1	1	2					1	1	1	1	1	1					1	1	117
1189	BP	GO:0060042	retina morphogenesis in camera-type eye	11							1	1																	56
1190	BP	GO:0010842	retina layer formation	12							1	1																	23
1191	BP	GO:0043587	tongue morphogenesis	9					1	1																			9
1192	BP	GO:0061197	fungiform papilla morphogenesis	10					1	1																			5
1193	BP	GO:0061198	fungiform papilla formation	11					1	1																			3
1194	BP	GO:0072132	mesenchyme morphogenesis	8			1	1							1	1			1	1					1	1			41
1195	BP	GO:0090131	mesenchyme migration	9			1	1							1	1			1	1					1	1			4
1196	BP	GO:0042476	odontogenesis	8					1	1	1	1							1	1							1	1	124
1197	BP	GO:0042475	odontogenesis of dentin-containing tooth	9					1	1																	1	1	89
1198	BP	GO:0034505	tooth mineralization	9							1	1																	22
1199	BP	GO:0048645	organ formation	8	1	1							1	1			1	1	1	1	1	1	1	1			1	1	67
1200	BP	GO:0022612	gland morphogenesis	8	1	2	1	1	1	2	1	3			1	2	1	2			1	1	1	4	1	4	1	3	135
1201	BP	GO:0060443	mammary gland morphogenesis	9					1	1							1	2					1	1	1	2	1	1	55
1202	BP	GO:0060056	mammary gland involution	10																			1	1	1	2			10
1203	BP	GO:0072576	liver morphogenesis	9	1	1					1	1													1	1			18
1204	BP	GO:0072575	epithelial cell proliferation involved in liver morphogenesis	10	1	1																			1	1			16
1205	BP	GO:0072574	hepatocyte proliferation	11	1	1																			1	1			16
1206	BP	GO:0007435	salivary gland morphogenesis	9	1	1	1	1							1	1							1	1					36
1207	BP	GO:0060661	submandibular salivary gland formation	10			1	1							1	1							1	1					2
1208	BP	GO:0048644	muscle organ morphogenesis	8			1	1							1	1	1	1	1	1					1	1			72
1209	BP	GO:0060415	muscle tissue morphogenesis	9			1	1							1	1	1	1	1	1					1	1			65
1210	BP	GO:0060612	adipose tissue development	7	1	2			1	1	1	1	1	1	1	2	1	1	1	3	1	1	1	1	1	1	1	1	36
1211	BP	GO:0060613	fat pad development	8																			1	1					8
1212	BP	GO:0001501	skeletal system development	6	1	4	1	3	1	4	1	7	1	2	1	1	1	5	1	4	1	5	1	5	1	3	1	5	507
1213	BP	GO:0060348	bone development	7			1	2	1	3	1	3	1	1			1	1	1	3	1	3	1	1			1	2	181
1214	BP	GO:0048705	skeletal system morphogenesis	7					1	2	1	2					1	1	1	2			1	1			1	1	218
1215	BP	GO:0060349	bone morphogenesis	8					1	2	1	1					1	1	1	2							1	1	88
1216	BP	GO:0060350	endochondral bone morphogenesis	9					1	2							1	1	1	2							1	1	53
1217	BP	GO:0001958	endochondral ossification	10					1	1							1	1											29
1218	BP	GO:0051216	cartilage development	7	1	2	1	1	1	3	1	1	1	1			1	3	1	2	1	2	1	1	1	1	1	3	189
1219	BP	GO:0060351	cartilage development involved in endochondral bone morphogenesis	8					1	1									1	2							1	1	27
1220	BP	GO:0060541	respiratory system development	6	1	2	1	2			1	4	1	2	1	2	1	3	1	3	1	3	1	3	1	2	1	1	228
1221	BP	GO:0060438	trachea development	7															1	1									20
1222	BP	GO:0060439	trachea morphogenesis	8															1	1									12
1223	BP	GO:0060440	trachea formation	9															1	1									7
1224	BP	GO:0060539	diaphragm development	7													1	1	1	1									12
1225	BP	GO:0072359	circulatory system development	6	0.927	14	0.174	14	1	9	1	11	1	6	1	10	1	12	1	11	1	7	1	11	1	13	1	7	987
1226	BP	GO:0048483	autonomic nervous system development	6							1	1																	44
1227	BP	GO:0072001	renal system development	6	1	1	1	2	1	1	1	3	1	1	1	2	1	2	1	2	1	2	1	1	1	2	1	3	291
1228	BP	GO:0001822	kidney development	7	1	1	1	2	1	1	1	3	1	1	1	2	1	2	1	2	1	2	1	1	1	2	1	3	274
1229	BP	GO:0072074	kidney mesenchyme development	8													1	1	1	1									18
1230	BP	GO:0001656	metanephros development	8											1	1	1	1	1	2	1	1			1	2	1	1	93
1231	BP	GO:0072075	metanephric mesenchyme development	9													1	1	1	1									15
1232	BP	GO:0072006	nephron development	8	1	1	1	1	1	1	1	1	1	1	1	1	1	2	1	2	1	2	1	1	1	2	1	3	133
1233	BP	GO:0032835	glomerulus development	9													1	1	1	1									58
1234	BP	GO:0001823	mesonephros development	8	1	1	1	1	1	1	1	1	1	1			1	2	1	1	1	1	1	1			1	2	105
1235	BP	GO:0060993	kidney morphogenesis	8	1	1	1	1	1	1	1	1	1	1			1	2	1	1	1	1	1	1			1	2	94
1236	BP	GO:0003338	metanephros morphogenesis	9													1	1	1	1									33
1237	BP	GO:0072028	nephron morphogenesis	9	1	1	1	1	1	1	1	1	1	1			1	1			1	1	1	1			1	2	79
1238	BP	GO:0072073	kidney epithelium development	8	1	1	1	1	1	1	1	1	1	1	1	1	1	2	1	2	1	2	1	1	1	2	1	3	142
1239	BP	GO:0072009	nephron epithelium development	9	1	1	1	1	1	1	1	1	1	1	1	1	1	2	1	2	1	2	1	1	1	2	1	3	109
1240	BP	GO:0072010	glomerular epithelium development	10													1	1	1	1									20
1241	BP	GO:0072088	nephron epithelium morphogenesis	10	1	1	1	1	1	1	1	1	1	1			1	1			1	1	1	1			1	2	77
1242	BP	GO:0072163	mesonephric epithelium development	9	1	1	1	1	1	1	1	1	1	1			1	2	1	1	1	1	1	1			1	2	101
1243	BP	GO:0072207	metanephric epithelium development	9											1	1			1	1	1	1			1	2	1	1	28
1244	BP	GO:0072243	metanephric nephron epithelium development	10											1	1			1	1	1	1			1	2	1	1	24
1245	BP	GO:0072358	cardiovascular system development	6	0.927	14	0.174	14	1	9	1	11	1	6	1	10	1	12	1	11	1	7	1	11	1	13	1	7	987
1246	BP	GO:0007507	heart development	7	1	9	1	8	1	4	1	6	1	5	1	7	1	8	0.13	11	1	4	1	4	1	9	1	3	538
1247	BP	GO:0003205	cardiac chamber development	8	1	1	1	1							1	1	1	2	1	1	1	1			1	2			151
1248	BP	GO:0003230	cardiac atrium development	9	1	1	1	1									1	1			1	1			1	1			32
1249	BP	GO:0003231	cardiac ventricle development	9	1	1	1	1							1	1	1	2	1	1	1	1			1	2			111
1250	BP	GO:0003279	cardiac septum development	9	1	1	1	1									1	1	1	1	1	1			1	1			93
1251	BP	GO:0003281	ventricular septum development	10	1	1	1	1									1	1	1	1	1	1			1	1			59
1252	BP	GO:0003283	atrial septum development	10	1	1	1	1									1	1			1	1			1	1			19
1253	BP	GO:0007512	adult heart development	8	1	1																			1	1			16
1254	BP	GO:0036302	atrioventricular canal development	8									1	1															6
1255	BP	GO:0003170	heart valve development	8	1	1	1	1									1	1			1	1			1	1			37
1256	BP	GO:0003171	atrioventricular valve development	9	1	1	1	1									1	1			1	1			1	1			21
1257	BP	GO:0003179	heart valve morphogenesis	9	1	1	1	1									1	1			1	1			1	1			31
1258	BP	GO:0003181	atrioventricular valve morphogenesis	10	1	1	1	1									1	1			1	1			1	1			18
1259	BP	GO:0003007	heart morphogenesis	8	1	2	1	3	1	1					1	2	1	2	1	3	1	1	1	1	1	5	1	1	229
1260	BP	GO:0061323	cell proliferation involved in heart morphogenesis	9											1	1									1	1			16
1261	BP	GO:0003206	cardiac chamber morphogenesis	9	1	1	1	1									1	2			1	1			1	1			105
1262	BP	GO:0003209	cardiac atrium morphogenesis	10	1	1	1	1									1	1			1	1			1	1			27
1263	BP	GO:0003208	cardiac ventricle morphogenesis	10													1	1											62
1264	BP	GO:0060411	cardiac septum morphogenesis	10	1	1	1	1									1	1			1	1			1	1			51
1265	BP	GO:0060413	atrial septum morphogenesis	11	1	1	1	1									1	1			1	1			1	1			14
1266	BP	GO:0003151	outflow tract morphogenesis	9			1	1	1	1									1	1							1	1	61
1267	BP	GO:0003197	endocardial cushion development	8					1	1									1	1							1	1	33
1268	BP	GO:0048738	cardiac muscle tissue development	8	1	3	1	4			1	4	1	4	1	4	1	4	1	4	1	2	1	3	1	4	1	2	182
1269	BP	GO:0003229	ventricular cardiac muscle tissue development	9	1	1					1	1					1	2	1	1									48
1270	BP	GO:0055008	cardiac muscle tissue morphogenesis	9			1	1							1	1	1	1	1	1					1	1			55
1271	BP	GO:0055010	ventricular cardiac muscle tissue morphogenesis	10													1	1											40
1272	BP	GO:0003223	ventricular compact myocardium morphogenesis	11													1	1											2
1273	BP	GO:0003161	cardiac conduction system development	8	1	1	1	1			1	1			1	1	1	1	1	1			1	1					14
1274	BP	GO:0003164	His-Purkinje system development	9	1	1					1	1					1	1	1	1									5
1275	BP	GO:0003165	Purkinje myocyte development	10	1	1					1	1					1	1	1	1									2
1276	BP	GO:0007422	peripheral nervous system development	6	1	1	1	2			1	1			1	1							1	1	1	2			76
1277	BP	GO:0002520	immune system development	6	0.0118	16	0.139	13	0.526	12	0.634	13	1	11	1	10	0.0247	15	0.0316	15	0.00162	16	0.161	13	1	9	1	10	843
1278	BP	GO:0002200	somatic diversification of immune receptors	7	0.0369	5	1	2	0.417	4	0.609	4	0.436	4	1	2	0.546	4	1	1	1	1					1	2	65
1279	BP	GO:0002566	somatic diversification of immune receptors via somatic mutation	8	1	2					1	1																	18
1280	BP	GO:0016445	somatic diversification of immunoglobulins	8	0.304	4	1	2	0.202	4	1	3	1	2	1	2	1	2	1	1	1	1					1	2	54
1281	BP	GO:0002208	somatic diversification of immunoglobulins involved in immune response	9	1	3	1	2	1	2	1	2	1	2	1	2	1	2	1	1	1	1					1	2	39
1282	BP	GO:0016446	somatic hypermutation of immunoglobulin genes	9	1	1																							17
1283	BP	GO:0048534	hematopoietic or lymphoid organ development	7	1	12	1	11	1	9	1	10	1	9	1	8	0.222	13	0.0681	14	0.00395	15	0.089	13	1	9	1	8	795
1284	BP	GO:0048536	spleen development	8					1	1											1	1							43
1285	BP	GO:0030097	hemopoiesis	8	0.811	12	0.802	11	1	9	1	10	1	9	1	8	0.123	13	1	11	0.00189	15	0.0481	13	1	9	1	8	749
1286	BP	GO:0060216	definitive hemopoiesis	9	1	2					1	1									1	1							24
1287	BP	GO:0048538	thymus development	8					1	1									1	2									54
1288	BP	GO:0048539	bone marrow development	8															1	1									6
1289	BP	GO:0002507	tolerance induction	7									1	1			1	1											29
1290	BP	GO:0007417	central nervous system development	6	1	12	1	12	1	8	1	11	1	8	1	11	1	8	1	13	1	5	1	8	1	8	1	8	951
1291	BP	GO:0021626	central nervous system maturation	7											1	1													7
1292	BP	GO:0021510	spinal cord development	7	1	1			1	1	1	1							1	1	1	1							112
1293	BP	GO:0007420	brain development	7	1	11	0.567	11	1	5	1	5	1	7	1	8	1	7	1	10	1	3	1	8	1	7	1	5	719
1294	BP	GO:0030901	midbrain development	8	1	3	1	4					1	3	1	2	1	3	1	4	1	1	1	3			1	2	89
1295	BP	GO:0021762	substantia nigra development	9	1	3	0.131	4					1	3	1	2	1	3	0.176	4	1	1	1	3			1	2	48
1296	BP	GO:0030900	forebrain development	8	1	5	1	2	1	1	1	2	1	1	1	2	1	1	1	3	1	1	1	3	1	3	1	2	392
1297	BP	GO:0021537	telencephalon development	9	1	2	1	2	1	1	1	1			1	2			1	2			1	2	1	3	1	1	250
1298	BP	GO:0021543	pallium development	10	1	2	1	1	1	1	1	1			1	1			1	2			1	1	1	2	1	1	169
1299	BP	GO:0021987	cerebral cortex development	11	1	1	1	1	1	1									1	2					1	1	1	1	119
1300	BP	GO:0022038	corpus callosum development	10																					1	1			12
1301	BP	GO:0021544	subpallium development	10	1	1									1	1									1	1			23
1302	BP	GO:0021756	striatum development	11	1	1									1	1									1	1			17
1303	BP	GO:0021988	olfactory lobe development	10	1	1									1	1									1	1			39
1304	BP	GO:0021772	olfactory bulb development	11	1	1									1	1									1	1			37
1305	BP	GO:0061034	olfactory bulb mitral cell layer development	12	1	1									1	1									1	1			2
1306	BP	GO:0021536	diencephalon development	9	1	2							1	1	1	1	1	1			1	1	1	1	1	1	1	1	83
1307	BP	GO:0021794	thalamus development	10	1	1									1	1									1	1			15
1308	BP	GO:0021983	pituitary gland development	10	1	1							1	1			1	1			1	1	1	1			1	1	45
1309	BP	GO:0021984	adenohypophysis development	11	1	1							1	1			1	1			1	1	1	1			1	1	15
1310	BP	GO:0021846	cell proliferation in forebrain	9																			1	1					33
1311	BP	GO:0030902	hindbrain development	8	1	3	1	2	1	1	1	1	1	3	1	2	1	2	1	2	1	2	1	2	1	3	1	1	159
1312	BP	GO:0021578	hindbrain maturation	9											1	1													7
1313	BP	GO:0022037	metencephalon development	9	1	2	1	2	1	1	1	1	1	1	1	2	1	1	1	1			1	1	1	3			115
1314	BP	GO:0021549	cerebellum development	10	1	2	1	2	1	1	1	1	1	1	1	2			1	1			1	1	1	3			103
1315	BP	GO:0021695	cerebellar cortex development	11	1	2	1	1			1	1	1	1	1	2			1	1			1	1	1	3			54
1316	BP	GO:0021680	cerebellar Purkinje cell layer development	12	1	1	1	1			1	1			1	1									1	1			30
1317	BP	GO:0021681	cerebellar granular layer development	12															1	1			1	1					14
1318	BP	GO:0021590	cerebellum maturation	11											1	1													4
1319	BP	GO:0021699	cerebellar cortex maturation	12											1	1													3
1320	BP	GO:0021691	cerebellar Purkinje cell layer maturation	13											1	1													2
1321	BP	GO:0021548	pons development	10													1	1											13
1322	BP	GO:0021747	cochlear nucleus development	11													1	1											4
1323	BP	GO:0021575	hindbrain morphogenesis	9	1	1					1	1	1	1					1	1			1	1	1	1			47
1324	BP	GO:0021587	cerebellum morphogenesis	10	1	1					1	1	1	1					1	1			1	1	1	1			43
1325	BP	GO:0021696	cerebellar cortex morphogenesis	11	1	1					1	1	1	1					1	1			1	1	1	1			36
1326	BP	GO:0021692	cerebellar Purkinje cell layer morphogenesis	12	1	1					1	1																	17
1327	BP	GO:0021697	cerebellar cortex formation	12	1	1					1	1	1	1					1	1			1	1	1	1			26
1328	BP	GO:0021694	cerebellar Purkinje cell layer formation	13	1	1					1	1																	14
1329	BP	GO:0021683	cerebellar granular layer morphogenesis	12															1	1			1	1					11
1330	BP	GO:0021684	cerebellar granular layer formation	13															1	1			1	1					9
1331	BP	GO:0021534	cell proliferation in hindbrain	9	1	1							1	1			1	1			1	1	1	1			1	1	19
1332	BP	GO:0021924	cell proliferation in external granule layer	10	1	1							1	1			1	1			1	1	1	1			1	1	18
1333	BP	GO:0021930	cerebellar granule cell precursor proliferation	11	1	1							1	1			1	1			1	1	1	1			1	1	18
1334	BP	GO:0001944	vasculature development	6	1	6	1	8	1	5	1	4	1	3	1	4	1	6	1	4	1	5	1	8	1	6	1	5	630
1335	BP	GO:0001568	blood vessel development	7	1	6	1	8	1	5	1	4	1	3	1	4	1	6	1	4	1	5	1	8	1	6	1	5	607
1336	BP	GO:0060840	artery development	8															1	1									84
1337	BP	GO:0035904	aorta development	9															1	1									47
1338	BP	GO:0048514	blood vessel morphogenesis	8	1	5	1	8	1	5	1	3	1	3	1	4	1	6	1	2	1	5	1	8	1	6	1	5	511
1339	BP	GO:0001525	angiogenesis	9	1	5	1	7	1	4	1	2	1	3	1	4	1	5	1	2	1	5	1	8	1	5	1	5	430
1340	BP	GO:0002041	intussusceptive angiogenesis	10	1	1	1	1									1	1			1	1			1	1			2
1341	BP	GO:0002040	sprouting angiogenesis	10	1	1	1	1	1	1			1	3	1	1	1	2	1	2	1	2	1	2			1	2	64
1342	BP	GO:0060055	angiogenesis involved in wound healing	10	1	1																			1	1			18
1343	BP	GO:0060976	coronary vasculature development	8	1	1							1	1			1	1	1	1	1	1	1	1			1	1	44
1344	BP	GO:0060977	coronary vasculature morphogenesis	9	1	1							1	1			1	1			1	1	1	1			1	1	11
1345	BP	GO:0060978	angiogenesis involved in coronary vascular morphogenesis	9	1	1							1	1			1	1			1	1	1	1			1	1	3
1346	BP	GO:0048486	parasympathetic nervous system development	6							1	1																	19
1347	BP	GO:0021783	preganglionic parasympathetic fiber development	7							1	1																	17
1348	BP	GO:0021557	oculomotor nerve development	8							1	1																	4
1349	BP	GO:0021622	oculomotor nerve morphogenesis	9							1	1																	2
1350	BP	GO:0021623	oculomotor nerve formation	10							1	1																	2
1351	BP	GO:0021591	ventricular system development	6	1	1	1	1							1	1									1	2			29
1352	BP	GO:0021670	lateral ventricle development	7			1	1							1	1									1	1			13
1353	BP	GO:0021761	limbic system development	6	1	1					1	1			1	1							1	1	1	2			107
1354	BP	GO:0021766	hippocampus development	7	1	1					1	1			1	1							1	1	1	2			77
1355	BP	GO:0048736	appendage development	5	1	1			1	2	1	1					1	2											178
1356	BP	GO:0035107	appendage morphogenesis	6	1	1			1	2	1	1					1	1											157
1357	BP	GO:0060173	limb development	6	1	1			1	2	1	1					1	2											178
1358	BP	GO:0035108	limb morphogenesis	7	1	1			1	2	1	1					1	1											157
1359	BP	GO:0035136	forelimb morphogenesis	8							1	1																	42
1360	BP	GO:0035137	hindlimb morphogenesis	8					1	1							1	1											40
1361	BP	GO:0009838	abscission	5					1	1					1	1			1	1									6
1362	BP	GO:0009790	embryo development	5	1	14	1	11	1	11	2.38e-05	22	1	11	0.132	16	0.00417	18	0.000302	20	0.0048	17	1	11	1	14	1	12	1030
1363	BP	GO:0009792	embryo development ending in birth or egg hatching	6	1	10	1	8	1	8	0.000334	16	1	8	0.828	11	0.524	11	0.0322	13	0.246	11	1	9	1	10	1	8	644
1364	BP	GO:0043009	chordate embryonic development	7	1	9	1	8	1	8	0.00156	15	1	5	0.746	11	1	9	0.131	12	1	9	1	8	1	10	1	6	636
1365	BP	GO:0001701	in utero embryonic development	8	0.247	9	1	7	1	6	0.000923	12	1	5	1	7	1	7	0.000672	12	0.536	8	1	7	1	8	1	6	377
1366	BP	GO:0001824	blastocyst development	9	1	2	1	2	1	2	1	4	1	2	1	1	1	3	0.0741	5	1	2	0.844	4			0.941	4	77
1367	BP	GO:0001832	blastocyst growth	10	1	1	1	1	1	1	1	2			1	1	1	1	1	2			1	1			1	1	23
1368	BP	GO:0001833	inner cell mass cell proliferation	11							1	1							1	1									15
1369	BP	GO:0001825	blastocyst formation	10	1	2	1	1	1	2	1	3	1	2	1	1	1	3	1	3	1	2	1	3			1	3	36
1370	BP	GO:0048706	embryonic skeletal system development	8	1	1			1	1	1	2					1	1					1	1					130
1371	BP	GO:0048598	embryonic morphogenesis	6	1	9	1	3	1	3	0.482	11	1	2	1	7	1	8	1	6	1	6	1	4	1	6	1	6	608
1372	BP	GO:0035113	embryonic appendage morphogenesis	7	1	1			1	2	1	1					1	1											134
1373	BP	GO:0030326	embryonic limb morphogenesis	8	1	1			1	2	1	1					1	1											134
1374	BP	GO:0035116	embryonic hindlimb morphogenesis	9					1	1							1	1											31
1375	BP	GO:0035115	embryonic forelimb morphogenesis	9							1	1																	34
1376	BP	GO:0007369	gastrulation	7	1	2	1	1	1	1	0.6	6	1	1	1	2	1	1	1	3	1	2	1	1			1	3	182
1377	BP	GO:0001702	gastrulation with mouth forming second	8	1	1					1	1																	30
1378	BP	GO:0001704	formation of primary germ layer	8	1	1	1	1	1	1	1	4	1	1	1	1	1	1	1	3	1	2	1	1			1	3	120
1379	BP	GO:0001706	endoderm formation	9	1	1	1	1	1	1	0.342	4			1	1	1	1	1	2	1	1	1	1			1	3	56
1380	BP	GO:0001707	mesoderm formation	9									1	1					1	1	1	1							68
1381	BP	GO:0010172	embryonic body morphogenesis	7	1	2					1	2					1	1											13
1382	BP	GO:0016331	morphogenesis of embryonic epithelium	7	1	2	1	1			1	2			1	4	1	2	1	1	1	1			1	3			160
1383	BP	GO:0042733	embryonic digit morphogenesis	7					1	1																			64
1384	BP	GO:0061053	somite development	6					1	2	1	1																	87
1385	BP	GO:0048568	embryonic organ development	6	1	3	1	1	1	2	1	4	1	1	1	1	1	4	1	2	1	3	1	2	1	4	1	2	449
1386	BP	GO:0030903	notochord development	7																					1	1			21
1387	BP	GO:0031076	embryonic camera-type eye development	7	1	1					1	1																	37
1388	BP	GO:0048562	embryonic organ morphogenesis	7	1	1			1	1	1	3					1	3	1	2	1	1	1	2	1	3	1	1	305
1389	BP	GO:0042471	ear morphogenesis	8							1	2					1	2	1	2	1	1	1	1	1	1	1	1	126
1390	BP	GO:0042473	outer ear morphogenesis	9															1	1									9
1391	BP	GO:0042474	middle ear morphogenesis	9													1	1	1	1									22
1392	BP	GO:0042472	inner ear morphogenesis	9							1	2					1	1			1	1	1	1	1	1	1	1	106
1393	BP	GO:0048048	embryonic eye morphogenesis	8	1	1					1	1																	36
1394	BP	GO:0048596	embryonic camera-type eye morphogenesis	9	1	1					1	1																	27
1395	BP	GO:0060900	embryonic camera-type eye formation	10							1	1																	12
1396	BP	GO:0002072	optic cup morphogenesis involved in camera-type eye development	11							1	1																	8
1397	BP	GO:0003409	optic cup structural organization	12							1	1																	1
1398	BP	GO:0003404	optic vesicle morphogenesis	10							1	1																	2
1399	BP	GO:0048704	embryonic skeletal system morphogenesis	8					1	1	1	2					1	1					1	1					97
1400	BP	GO:0048701	embryonic cranial skeleton morphogenesis	9					1	1	1	2					1	1					1	1					46
1401	BP	GO:0035162	embryonic hemopoiesis	7																	1	1							25
1402	BP	GO:0035295	tube development	5	1	5	1	7	1	3	1	8	1	3	1	7	1	5	1	4	1	5	1	4	1	9	1	5	635
1403	BP	GO:0035239	tube morphogenesis	6	1	3	1	2	1	2	1	2	1	2	1	4	1	3			1	2	1	2	1	6	1	3	384
1404	BP	GO:0035148	tube formation	7	1	1	1	1			1	1			1	4	1	1			1	1			1	3			147
1405	BP	GO:0060606	tube closure	8	1	1	1	1			1	1			1	3	1	1			1	1			1	3			95
1406	BP	GO:0060562	epithelial tube morphogenesis	7	1	2	1	2	1	2	1	2	1	2	1	4	1	3			1	2	1	2	1	6	1	3	342
1407	BP	GO:0072175	epithelial tube formation	8	1	1	1	1			1	1			1	4	1	1			1	1			1	3			132
1408	BP	GO:0001838	embryonic epithelial tube formation	9	1	1	1	1			1	1			1	4	1	1			1	1			1	3			131
1409	BP	GO:0060603	mammary gland duct morphogenesis	8					1	1							1	2					1	1	1	1	1	1	40
1410	BP	GO:0048565	digestive tract development	6	1	2	1	2	1	1	1	2	1	1											1	1	1	1	146
1411	BP	GO:0048546	digestive tract morphogenesis	7	1	1																							55
1412	BP	GO:0030323	respiratory tube development	6	1	2	1	2			1	4	1	2	1	2	1	2	1	2	1	3	1	3	1	2	1	1	200
1413	BP	GO:0030324	lung development	7	1	2	1	2			1	4	1	2	1	2	1	2	1	2	1	3	1	3	1	2	1	1	196
1414	BP	GO:0060425	lung morphogenesis	8			1	2			1	2			1	2	1	1	1	2	1	2	1	1	1	1			58
1415	BP	GO:0060428	lung epithelium development	8			1	2			1	2			1	1					1	1	1	2	1	1			46
1416	BP	GO:0060502	epithelial cell proliferation involved in lung morphogenesis	9			1	2			1	1			1	1					1	1	1	1					11
1417	BP	GO:0061326	renal tubule development	6	1	1	1	1	1	1	1	1	1	1	1	1	1	1	1	1	1	2	1	1	1	2	1	3	97
1418	BP	GO:0061333	renal tubule morphogenesis	7	1	1	1	1	1	1	1	1	1	1			1	1			1	1	1	1			1	2	79
1419	BP	GO:0072080	nephron tubule development	7	1	1	1	1	1	1	1	1	1	1	1	1	1	1	1	1	1	2	1	1	1	2	1	3	94
1420	BP	GO:0072014	proximal tubule development	8											1	1			1	1	1	1			1	1	1	1	5
1421	BP	GO:0072019	proximal convoluted tubule development	9											1	1			1	1	1	1			1	1	1	1	2
1422	BP	GO:0072078	nephron tubule morphogenesis	8	1	1	1	1	1	1	1	1	1	1			1	1			1	1	1	1			1	2	75
1423	BP	GO:0072044	collecting duct development	6			1	1																					13
1424	BP	GO:0072061	inner medullary collecting duct development	7			1	1																					3
1425	BP	GO:0021915	neural tube development	6	1	1	1	1			1	2			1	5	1	2	1	1	1	2			1	3			168
1426	BP	GO:0001841	neural tube formation	7	1	1	1	1			1	1			1	4	1	1			1	1			1	3			111
1427	BP	GO:0014020	primary neural tube formation	8	1	1	1	1			1	1			1	4	1	1			1	1			1	3			99
1428	BP	GO:0001842	neural fold formation	9	1	1					1	1			1	1													7
1429	BP	GO:0001843	neural tube closure	9	1	1	1	1			1	1			1	3	1	1			1	1			1	3			94
1430	BP	GO:0021995	neuropore closure	10	1	1					1	1																	1
1431	BP	GO:0021506	anterior neuropore closure	11	1	1					1	1																	1
1432	BP	GO:0035050	embryonic heart tube development	6																					1	2			80
1433	BP	GO:0003143	embryonic heart tube morphogenesis	7																					1	2			67
1434	BP	GO:0072170	metanephric tubule development	6											1	1			1	1	1	1			1	2	1	1	24
1435	BP	GO:0072234	metanephric nephron tubule development	7											1	1			1	1	1	1			1	2	1	1	21
1436	BP	GO:0072237	metanephric proximal tubule development	8											1	1			1	1	1	1			1	1	1	1	3
1437	BP	GO:0072229	metanephric proximal convoluted tubule development	8											1	1			1	1	1	1			1	1	1	1	2
1438	BP	GO:0072164	mesonephric tubule development	6	1	1	1	1	1	1	1	1	1	1			1	2	1	1	1	1	1	1			1	2	101
1439	BP	GO:0072171	mesonephric tubule morphogenesis	7	1	1	1	1	1	1	1	1	1	1			1	1			1	1	1	1			1	2	67
1440	BP	GO:0001657	ureteric bud development	7	1	1	1	1	1	1	1	1	1	1			1	2	1	1	1	1	1	1			1	2	100
1441	BP	GO:0060675	ureteric bud morphogenesis	8	1	1	1	1	1	1	1	1	1	1			1	1			1	1	1	1			1	2	66
1442	BP	GO:0035502	metanephric part of ureteric bud development	6													1	1	1	1									6
1443	BP	GO:0033555	multicellular organismal response to stress	4			1	2	1	1	1	1			1	3	1	1	1	2	1	1	1	2	0.118	5	1	1	80
1444	BP	GO:0042596	fear response	5			1	2							1	2									1	3			39
1445	BP	GO:0001662	behavioral fear response	6			1	2							1	2									1	3			36
1446	BP	GO:0048265	response to pain	5					1	1	1	1							1	1	1	1	1	1	1	1	1	1	34
1447	BP	GO:0048266	behavioral response to pain	6					1	1									1	1							1	1	18
1448	BP	GO:0019827	stem cell population maintenance	4	0.00416	8	9.53e-05	9	0.0013	8	0.000333	9	1	4	1	4	1	4	1	4	0.206	6	1	3	0.0534	7	1	5	167
1449	BP	GO:0035019	somatic stem cell population maintenance	5	1	3	1	2	1	2	1	1	0.882	4			1	1			1	1	1	1	1	1	1	1	78
1450	BP	GO:0097150	neuronal stem cell population maintenance	5	1	1															1	1							21
1451	BP	GO:0007389	pattern specification process	4	1	3	1	1	1	2	1	3	1	3			1	5	1	4	1	4	1	2	1	1	1	3	467
1452	BP	GO:0009799	specification of symmetry	5																					1	1			131
1453	BP	GO:0009855	determination of bilateral symmetry	6																					1	1			130
1454	BP	GO:0007368	determination of left/right symmetry	7																					1	1			122
1455	BP	GO:0061371	determination of heart left/right asymmetry	8																					1	1			63
1456	BP	GO:0001947	heart looping	9																					1	1			60
1457	BP	GO:0003002	regionalization	5	1	3	1	1	1	2	1	3	1	3			1	5	1	4	1	4	1	2			1	3	350
1458	BP	GO:0009952	anterior/posterior pattern specification	6	1	2			1	1	1	3	1	2			1	4	1	4	1	3	1	1			1	1	212
1459	BP	GO:0035282	segmentation	6					1	1	1	1					1	1	1	1									100
1460	BP	GO:0001756	somitogenesis	7					1	1	1	1																	71
1461	BP	GO:0010092	specification of organ identity	6	1	1							1	1			1	1			1	1	1	1			1	1	35
1462	BP	GO:0021871	forebrain regionalization	6			1	1	1	1																	1	1	26
1463	BP	GO:0021978	telencephalon regionalization	6			1	1	1	1																	1	1	14
1464	BP	GO:0021796	cerebral cortex regionalization	6			1	1	1	1																	1	1	8
1465	BP	GO:0009798	axis specification	5	1	1					1	1					1	1	1	1									96
1466	BP	GO:0009948	anterior/posterior axis specification	6	1	1					1	1					1	1	1	1									51
1467	BP	GO:0009880	embryonic pattern specification	5													1	1	1	1									65
1468	BP	GO:0007350	blastoderm segmentation	6													1	1	1	1									18
1469	BP	GO:0007351	tripartite regional subdivision	7													1	1	1	1									14
1470	BP	GO:0000578	embryonic axis specification	6													1	1	1	1									37
1471	BP	GO:0008595	anterior/posterior axis specification, embryo	7													1	1	1	1									14
1472	BP	GO:0007354	zygotic determination of anterior/posterior axis, embryo	8													1	1	1	1									4
1473	BP	GO:0007356	thorax and anterior abdomen determination	9													1	1	1	1									2
1474	BP	GO:0009791	post-embryonic development	4	1	3			1	4	1	3	1	1			1	2	1	2	1	4	1	3	1	1	1	2	115
1475	BP	GO:0009886	post-embryonic morphogenesis	5	1	1			1	2							1	1									1	1	18
1476	BP	GO:0040032	post-embryonic body morphogenesis	6					1	1							1	1											1
1477	BP	GO:0048563	post-embryonic organ morphogenesis	6	1	1			1	1																	1	1	12
1478	BP	GO:0048050	post-embryonic eye morphogenesis	7	1	1			1	1																	1	1	8
1479	BP	GO:0031077	post-embryonic camera-type eye development	5	1	1			1	1																	1	1	8
1480	BP	GO:0048597	post-embryonic camera-type eye morphogenesis	6	1	1			1	1																	1	1	4
1481	BP	GO:0048871	multicellular organismal homeostasis	4	1	2	0.281	8	1	3	1	2	1	6	1	2	1	3	1	5	1	5	1	3	1	5	1	4	347
1482	BP	GO:0001659	temperature homeostasis	5	1	1	1	2			1	1					1	1	1	1					1	1	1	1	40
1483	BP	GO:0031649	heat generation	6			1	1			1	1																	21
1484	BP	GO:0001660	fever generation	7			1	1			1	1																	14
1485	BP	GO:0001894	tissue homeostasis	5	1	1	0.893	6	1	3	1	2	1	5	1	2	1	2	1	3	1	5	1	2	1	3	1	3	221
1486	BP	GO:0010669	epithelial structure maintenance	6	1	1	1	1			1	1			1	1									1	1			24
1487	BP	GO:0030277	maintenance of gastrointestinal epithelium	7			1	1							1	1									1	1			18
1488	BP	GO:0001895	retina homeostasis	6			1	3	1	1					1	1					1	1	1	1	1	1			76
1489	BP	GO:0036438	maintenance of lens transparency	6									1	1											1	1	1	1	4
1490	BP	GO:0048875	chemical homeostasis within a tissue	6			1	1			1	1																	14
1491	BP	GO:0043129	surfactant homeostasis	7			1	1			1	1																	12
1492	BP	GO:0048873	homeostasis of number of cells within a tissue	6									1	1							1	1							32
1493	BP	GO:0045453	bone resorption	6					1	1			1	2			1	1	1	2	1	2	1	1			1	2	55
1494	BP	GO:0050891	multicellular organismal water homeostasis	5			1	1	1	1			1	1			1	1	1	1			1	1	1	1			60
1495	BP	GO:0033561	regulation of water loss via skin	6			1	1															1	1					19
1496	BP	GO:0061436	establishment of skin barrier	7			1	1															1	1					17
1497	BP	GO:0003091	renal water homeostasis	6					1	1			1	1			1	1	1	1					1	1			36
1498	BP	GO:0035265	organ growth	4	1	1	1	3	1	1	1	2	1	3	1	4	1	2	1	3	1	1	1	1	1	4	1	3	146
1499	BP	GO:0098868	bone growth	5					1	1									1	2							1	1	24
1500	BP	GO:0003416	endochondral bone growth	6					1	1									1	2							1	1	22
1501	BP	GO:0003417	growth plate cartilage development	7					1	1									1	2							1	1	16
1502	BP	GO:0003419	growth plate cartilage chondrocyte proliferation	8															1	1									4
1503	BP	GO:0060419	heart growth	5	1	1	1	2			1	2	1	2	1	2	1	2	1	1	1	1	1	1	1	2	1	2	67
1504	BP	GO:0055017	cardiac muscle tissue growth	6	1	1	1	2			1	2	1	2	1	2	1	1			1	1	1	1	1	2	1	2	59
1505	BP	GO:0003301	physiological cardiac muscle hypertrophy	7			1	1					1	1	1	1									1	1	1	1	17
1506	BP	GO:0060038	cardiac muscle cell proliferation	7	1	1	1	1			1	2	1	1	1	1	1	1			1	1	1	1	1	1	1	1	39
1507	BP	GO:0002021	response to dietary excess	4																			1	1					23
1508	BP	GO:0002532	production of molecular mediator involved in inflammatory response	4	1	1																			1	1	1	1	39
1509	BP	GO:0002349	histamine production involved in inflammatory response	5	1	1																			1	1	1	1	5
1510	BP	GO:0001763	morphogenesis of a branching structure	4	1	1	1	1	1	2	1	1	1	2			1	2			1	1	1	2	1	3	1	4	217
1511	BP	GO:0061138	morphogenesis of a branching epithelium	5	1	1	1	1	1	2	1	1	1	2			1	2			1	1	1	2	1	3	1	4	202
1512	BP	GO:0060602	branch elongation of an epithelium	6																					1	1			22
1513	BP	GO:0048754	branching morphogenesis of an epithelial tube	6	1	1	1	1	1	2	1	1	1	2			1	2			1	1	1	2	1	3	1	3	167
1514	BP	GO:0060441	epithelial tube branching involved in lung morphogenesis	7																					1	1			31
1515	BP	GO:0060449	bud elongation involved in lung branching	8																					1	1			7
1516	BP	GO:0060444	branching involved in mammary gland duct morphogenesis	7					1	1							1	1					1	1	1	1	1	1	27
1517	BP	GO:0001658	branching involved in ureteric bud morphogenesis	7	1	1	1	1	1	1	1	1	1	1			1	1			1	1	1	1			1	2	61
1518	BP	GO:0035264	multicellular organism growth	4			1	2	1	4	1	2	1	1	1	1	1	2	1	1	1	4	1	3	1	2	1	2	164
1519	BP	GO:0007611	learning or memory	4	1	2	1	1	1	1	1	3	1	1	1	3			1	1	1	4	1	2	1	4			241
1520	BP	GO:0007612	learning	5							1	3	1	1	1	1			1	1	1	3	1	2	1	2			147
1521	BP	GO:0008306	associative learning	6							1	1	1	1					1	1	1	2	1	1	1	1			85
1522	BP	GO:0007613	memory	5	1	1			1	1	1	1			1	1					1	2	1	1	1	2			106
1523	BP	GO:0007614	short-term memory	6					1	1	1	1									1	2	1	1	1	1			10
1524	BP	GO:0007616	long-term memory	6											1	1													30
1525	BP	GO:0007632	visual behavior	4									1	2					1	1	1	2			1	1			60
1526	BP	GO:0008542	visual learning	5									1	1					1	1	1	2			1	1			55
1527	BP	GO:0050892	intestinal absorption	4			1	1					1	1							1	1	1	1	1	1			33
1528	BP	GO:0098856	intestinal lipid absorption	5			1	1													1	1	1	1	1	1			14
1529	BP	GO:0030299	intestinal cholesterol absorption	6			1	1													1	1	1	1	1	1			14
1530	BP	GO:0003096	renal sodium ion transport	4							1	1									1	1	1	1	1	1	1	1	5
1531	BP	GO:0032504	multicellular organism reproduction	3	1	11	1	8	1	7	0.505	13	1	9	1	8	1	12	1	10	1	10	1	5	1	4	1	7	823
1532	BP	GO:0009987	cellular process	2	1.22e-126	273	2.14e-111	229	1.52e-113	229	8.72e-135	277	6.37e-102	221	3.39e-139	281	1.23e-141	269	3.07e-140	273	2.44e-130	243	6.43e-116	235	1.25e-146	292	2.96e-122	246	15371
1533	BP	GO:0036166	phenotypic switching	3	1	1																							1
1534	BP	GO:0006457	protein folding	3	1	5	2.72e-10	15	6.81e-08	13	7.41e-05	11	1	5	6.01e-07	13	0.000479	10	1	5	0.00231	9	9.16e-08	13	8.97e-07	13	0.24	7	240
1535	BP	GO:0042026	protein refolding	4	1	2	1	2	0.274	3	1	2					1	1	1	1	0.281	3	1	1	1	1	1	1	22
1536	BP	GO:0007023	post-chaperonin tubulin folding pathway	4																			1	1					4
1537	BP	GO:0034975	protein folding in endoplasmic reticulum	4																							1	1	10
1538	BP	GO:0006458	'de novo' protein folding	4	1	1	0.0108	5	1	3	1	3	1	2	0.0193	5	1	3	1	2	1	1	0.0113	5	0.000985	6	1	3	57
1539	BP	GO:0051084	'de novo' posttranslational protein folding	5	1	1	0.00753	5	1	3	1	2	1	2	0.0135	5	1	3	1	2	1	1	0.00784	5	0.000634	6	1	3	53
1540	BP	GO:0051083	'de novo' cotranslational protein folding	5							1	1																	2
1541	BP	GO:0061077	chaperone-mediated protein folding	4	1	2	1	2	0.00018	6	1.23e-05	7	1	1	0.0111	5	0.212	4	1	3	0.00646	5	1	1	1	2	1	3	51
1542	BP	GO:0070389	chaperone cofactor-dependent protein refolding	5							1	1																	5
1543	BP	GO:0051085	chaperone mediated protein folding requiring cofactor	5	1	1			1	1	1	2					1	2	1	1	1	1					1	1	10
1544	BP	GO:0022417	protein maturation by protein folding	4							1	1			1	1	1	1					1	1			1	1	9
1545	BP	GO:0019835	cytolysis	3											1	1													30
1546	BP	GO:0044763	single-organism cellular process	3	7.05e-53	188	1.08e-67	181	3.47e-51	163	5.45e-63	199	1.35e-44	155	2.8e-76	214	4.7e-59	187	1.09e-62	194	4.01e-52	167	2.27e-64	180	4.94e-90	232	1.84e-52	172	12573
1547	BP	GO:0007272	ensheathment of neurons	4	1	1	1	2	1	1	1	4			1	1	1	2	1	2	1	2	1	1			1	1	113
1548	BP	GO:0008366	axon ensheathment	5	1	1	1	2	1	1	1	4			1	1	1	2	1	2	1	2	1	1			1	1	113
1549	BP	GO:0032292	peripheral nervous system axon ensheathment	6			1	1																					22
1550	BP	GO:0032291	axon ensheathment in central nervous system	6															1	1	1	1							13
1551	BP	GO:0042552	myelination	6	1	1	1	2	1	1	1	4			1	1	1	2	1	2	1	2	1	1			1	1	110
1552	BP	GO:0022406	membrane docking	4					1	1	1	2	1	2	1	1	1	3	1	3	1	2	1	3	1	1	1	2	71
1553	BP	GO:0022614	membrane to membrane docking	5																			1	1					5
1554	BP	GO:0022615	protein to membrane docking	5					1	1			1	1			1	1	1	1	1	1					1	1	8
1555	BP	GO:0048278	vesicle docking	5							1	2	1	1	1	1	1	2	1	2	1	1	1	2	1	1	1	1	58
1556	BP	GO:0048211	Golgi vesicle docking	6																					1	1			2
1557	BP	GO:0006928	movement of cell or subcellular component	4	1	21	3.3e-11	37	1	13	0.0129	26	0.17	21	9.98e-13	43	0.0436	24	0.174	23	1	16	3.15e-06	30	2.45e-14	46	0.00518	25	1979
1558	BP	GO:0048870	cell motility	5	1	15	0.0068	19	1	6	1	12	1	14	1	16	1	16	1	14	1	11	0.392	16	0.000859	23	1	15	1320
1559	BP	GO:0030317	sperm motility	6			1	1	1	1					1	1			1	1	1	1							66
1560	BP	GO:0016477	cell migration	6	1	15	0.00812	18	1	5	1	11	1	12	1	15	0.425	16	1	13	1	10	0.146	16	0.000192	23	0.755	15	1211
1561	BP	GO:0014812	muscle cell migration	7	1	1	1	1					1	1															66
1562	BP	GO:0014909	smooth muscle cell migration	8	1	1	1	1					1	1															55
1563	BP	GO:0006929	substrate-dependent cell migration	7	1	1	1	1	1	1	1	1			1	1	1	1			1	1	1	2	1	1	1	2	32
1564	BP	GO:0001667	ameboidal-type cell migration	7	1	7	1	5	1	1	1	3	1	7	1	5	1	4	1	4	1	2	1	4	0.569	8	1	4	323
1565	BP	GO:0010761	fibroblast migration	8	1	3	1	1	1	1			1	2	1	1	1	2	1	2	1	1	1	3	1	2	1	2	39
1566	BP	GO:0010631	epithelial cell migration	8	1	5	1	4	1	1	1	3	0.867	6	1	4	1	3	1	4	1	2	1	3	1	6	1	4	220
1567	BP	GO:0043542	endothelial cell migration	9	1	4	1	2	1	1	1	3	1	4	1	1	1	3	1	3	1	2	1	2	1	4	1	3	152
1568	BP	GO:0043534	blood vessel endothelial cell migration	10	1	2	1	2	1	1			1	3	1	1	1	2	1	2	1	2	1	2	1	3	1	2	72
1569	BP	GO:0002042	cell migration involved in sprouting angiogenesis	11	1	1							1	2			1	1	1	1	1	2	1	1			1	1	33
1570	BP	GO:0090521	glomerular visceral epithelial cell migration	9	1	1							1	1															2
1571	BP	GO:0061582	intestinal epithelial cell migration	9									1	1															2
1572	BP	GO:0050900	leukocyte migration	7			1	5	1	3	1	1	1	4	1	4	1	5	1	5	1	2	1	4	1	4	1	5	362
1573	BP	GO:0097529	myeloid leukocyte migration	8			1	1	1	1			1	2	1	1	1	2	1	1			1	1	1	2	1	1	160
1574	BP	GO:0097530	granulocyte migration	9					1	1					1	1			1	1			1	1	1	2	1	1	113
1575	BP	GO:0072677	eosinophil migration	10											1	1							1	1	1	1			15
1576	BP	GO:1990266	neutrophil migration	10											1	1							1	1	1	2			96
1577	BP	GO:0071674	mononuclear cell migration	8					1	1					1	1			1	1			1	1	1	1	1	1	16
1578	BP	GO:0045123	cellular extravasation	8									1	1	1	1	1	1	1	2	1	1			1	1			44
1579	BP	GO:0072672	neutrophil extravasation	9																					1	1			8
1580	BP	GO:0050901	leukocyte tethering or rolling	9									1	1	1	1	1	1	1	2	1	1			1	1			20
1581	BP	GO:0036336	dendritic cell migration	8			1	1					1	1	1	1	1	1					1	1					27
1582	BP	GO:0072676	lymphocyte migration	8																			1	1					75
1583	BP	GO:0021535	cell migration in hindbrain	7									1	1					1	1	1	1							14
1584	BP	GO:0021932	hindbrain radial glia guided cell migration	8									1	1					1	1	1	1							10
1585	BP	GO:0021885	forebrain cell migration	7	1	2									1	1			1	1					1	2			67
1586	BP	GO:0022029	telencephalon cell migration	8	1	2									1	1			1	1					1	2			64
1587	BP	GO:0021795	cerebral cortex cell migration	9	1	1													1	1					1	1			50
1588	BP	GO:0021799	cerebral cortex radially oriented cell migration	10															1	1					1	1			34
1589	BP	GO:0022028	tangential migration from the subventricular zone to the olfactory bulb	9	1	1									1	1									1	1			9
1590	BP	GO:0044319	wound healing, spreading of cells	7	1	1	1	2									1	1			1	1			1	1	1	1	24
1591	BP	GO:0035313	wound healing, spreading of epidermal cells	8			1	1																			1	1	17
1592	BP	GO:0001539	cilium or flagellum-dependent cell motility	6							1	1																	21
1593	BP	GO:0060285	cilium-dependent cell motility	7							1	1																	15
1594	BP	GO:0060242	contact inhibition	4																					1	1			8
1595	BP	GO:0007049	cell cycle	4	4.48e-24	55	4.75e-20	46	1.32e-09	33	4.36e-19	49	1.75e-18	44	9.37e-16	45	1.52e-05	29	3.83e-07	32	2.7e-05	27	1.98e-15	41	9.92e-17	47	3.41e-10	35	1796
1596	BP	GO:0000278	mitotic cell cycle	5	3.11e-22	42	1.46e-12	29	1.58e-07	23	8.53e-15	34	1.93e-17	34	4.1e-08	26	0.00465	18	0.0249	17	0.00533	17	1.35e-10	27	6.18e-17	37	9.25e-05	20	1038
1597	BP	GO:0007113	endomitotic cell cycle	6									1	1															3
1598	BP	GO:0033277	abortive mitotic cell cycle	6									1	1															2
1599	BP	GO:0007017	microtubule-based process	4	0.138	12	4.64e-11	22	1	7	9.71e-08	20	0.0048	13	2.79e-14	27	0.363	11	0.43	11	1	7	3.27e-06	17	5.76e-12	25	0.00027	15	617
1600	BP	GO:0034643	establishment of mitochondrion localization, microtubule-mediated	5													1	1	1	1	1	1							15
1601	BP	GO:0007018	microtubule-based movement	5	1	3	0.81	6	1	2	0.00299	9	1	3	2.82e-05	11	1	5	1	3	1	1	0.852	6	0.036	8	1	6	217
1602	BP	GO:0010970	microtubule-based transport	6	1	1	1	2	1	1	1	2	1	1	0.384	5	1	3	1	3	1	1	1	2	1	3	1	3	106
1603	BP	GO:0008088	axo-dendritic transport	7							1	2			1	2	1	1	1	1					1	1	1	3	43
1604	BP	GO:0008089	anterograde axonal transport	8							1	2			1	2	1	1	1	1					1	1	0.566	3	27
1605	BP	GO:0072384	organelle transport along microtubule	7	1	1	1	1	1	1	1	1	1	1	0.554	4	1	2	1	2	1	1	1	2	1	1	1	1	63
1606	BP	GO:0072385	minus-end-directed organelle transport along microtubule	8									1	1															3
1607	BP	GO:0047497	mitochondrion transport along microtubule	8													1	1	1	1	1	1							15
1608	BP	GO:0047496	vesicle transport along microtubule	8	1	1			1	1	1	1			1	2	1	1	1	1					1	1	1	1	37
1609	BP	GO:0099517	synaptic vesicle transport along microtubule	9							1	1			1	1											1	1	17
1610	BP	GO:0048490	anterograde synaptic vesicle transport	10							1	1			1	1											1	1	17
1611	BP	GO:0051012	microtubule sliding	6			1	1							1	1							1	1	1	1			2
1612	BP	GO:0003341	cilium movement	6							1	1																	48
1613	BP	GO:0060294	cilium movement involved in cell motility	7							1	1																	11
1614	BP	GO:0008037	cell recognition	4											1	2							1	1	1	2			154
1615	BP	GO:0009988	cell-cell recognition	5											1	2							1	1	1	2			63
1616	BP	GO:0001775	cell activation	4	1	9	2.79e-06	21	1	10	1	7	1	8	0.00554	18	1	13	1	11	1	9	0.768	13	0.000112	21	1	10	989
1617	BP	GO:0045321	leukocyte activation	5	1	7	1	9	1	7	1	5	1	6	1	8	1	9	1	7	1	7	1	5	1	7	1	9	750
1618	BP	GO:0002274	myeloid leukocyte activation	6	1	2	1	1	1	2	1	2	1	1			1	3	1	2	1	1			1	2	1	3	160
1619	BP	GO:0036230	granulocyte activation	7							1	1																	30
1620	BP	GO:0042119	neutrophil activation	8							1	1																	26
1621	BP	GO:0045576	mast cell activation	7	1	1																			1	2	1	1	54
1622	BP	GO:0001773	myeloid dendritic cell activation	7									1	1			1	1											33
1623	BP	GO:0042116	macrophage activation	7	1	1	1	1	1	2	1	1	1	1			1	3	1	2	1	1					1	2	54
1624	BP	GO:0002270	plasmacytoid dendritic cell activation	6									1	1			1	1											1
1625	BP	GO:0046649	lymphocyte activation	6	1	6	1	9	1	6	1	4	1	6	1	8	1	9	1	6	1	7	1	5	1	5	1	7	644
1626	BP	GO:0042113	B cell activation	7	1	4	1	5	1	4	1	4	1	4	1	4	1	4	1	3	1	2	1	1	1	3	1	2	242
1627	BP	GO:0030101	natural killer cell activation	7											1	1	1	1	1	1			1	1					80
1628	BP	GO:0001771	immunological synapse formation	7											1	1							1	1	1	1			11
1629	BP	GO:0046651	lymphocyte proliferation	7	1	3	1	3	1	1	1	1	1	2	1	3	1	5	1	2	1	3	1	2	1	2	1	3	264
1630	BP	GO:0042100	B cell proliferation	8	1	1	1	3	1	1	1	1	1	1	1	1	1	2	1	1	1	1			1	1	1	1	91
1631	BP	GO:0001787	natural killer cell proliferation	8											1	1							1	1					9
1632	BP	GO:0070489	T cell aggregation	6	1	3	1	6	1	4	1	2	1	3	1	6	1	5	1	4	1	5	1	5	1	4	1	5	451
1633	BP	GO:0071594	thymocyte aggregation	7	1	1	1	2	1	2	1	1	1	1	1	1					1	1							76
1634	BP	GO:0042110	T cell activation	7	1	3	1	6	1	4	1	2	1	3	1	6	1	5	1	4	1	5	1	5	1	4	1	5	451
1635	BP	GO:0046631	alpha-beta T cell activation	8	1	1							1	1	1	1	1	3	1	1	1	1	1	1			1	2	117
1636	BP	GO:0035710	CD4-positive, alpha-beta T cell activation	9	1	1							1	1			1	2			1	1					1	1	65
1637	BP	GO:0035711	T-helper 1 cell activation	10									1	1			1	1											3
1638	BP	GO:0042098	T cell proliferation	8	1	1	1	2					1	2	1	3	1	2	1	1	1	1	1	2	1	2	1	1	180
1639	BP	GO:0033079	immature T cell proliferation	9			1	1					1	1	1	1													11
1640	BP	GO:0050798	activated T cell proliferation	9									1	1	1	1	1	1					1	1					46
1641	BP	GO:0046633	alpha-beta T cell proliferation	9	1	1									1	1	1	1			1	1	1	1			1	1	31
1642	BP	GO:0035739	CD4-positive, alpha-beta T cell proliferation	10	1	1											1	1			1	1					1	1	4
1643	BP	GO:0001866	NK T cell proliferation	10											1	1							1	1					6
1644	BP	GO:0002263	cell activation involved in immune response	5	1	4	1	2	1	2	1	3	1	3	1	4	1	4	1	2	1	1	1	2	1	4	1	3	211
1645	BP	GO:0002366	leukocyte activation involved in immune response	6	1	4	1	2	1	2	1	3	1	3	1	4	1	4	1	2	1	1	1	2	1	4	1	3	209
1646	BP	GO:0002275	myeloid cell activation involved in immune response	7	1	1					1	1	1	1			1	1							1	2	1	1	67
1647	BP	GO:0002279	mast cell activation involved in immune response	8	1	1																			1	2	1	1	42
1648	BP	GO:0002281	macrophage activation involved in immune response	8									1	1			1	1											10
1649	BP	GO:0002283	neutrophil activation involved in immune response	8							1	1																	15
1650	BP	GO:0002285	lymphocyte activation involved in immune response	7	1	3	1	2	1	2	1	2	1	3	1	4	1	4	1	2	1	1	1	2	1	2	1	2	149
1651	BP	GO:0002312	B cell activation involved in immune response	8	1	3	1	2	1	2	1	2	1	2	1	3	1	3	1	2	1	1	1	1	1	1	1	2	59
1652	BP	GO:0002286	T cell activation involved in immune response	8									1	1	1	1	1	1					1	1	1	1			88
1653	BP	GO:0002287	alpha-beta T cell activation involved in immune response	9									1	1			1	1											47
1654	BP	GO:0002291	T cell activation via T cell receptor contact with antigen bound to MHC molecule on antigen presenting cell	9											1	1							1	1	1	1			8
1655	BP	GO:0030168	platelet activation	5	1	2	1.95e-07	13	1	4	1	2	1	3	0.000172	11	1	4	1	5	1	2	0.00433	9	1.56e-08	15	1	3	259
1656	BP	GO:0070527	platelet aggregation	6			0.000372	6	1	1			1	1	0.376	4	1	1	1	1	1	1	0.263	4	3.6e-05	7			57
1657	BP	GO:0045103	intermediate filament-based process	4					1	1			1	3	1	1	1	2	1	1	1	1					1	2	44
1658	BP	GO:0051301	cell division	4	0.000644	16	2.58e-10	22	0.0618	12	0.000106	17	1.4e-07	19	9.61e-09	22	0.75	11	0.000385	16	1	10	1.64e-06	18	3.3e-05	18	0.00445	14	672
1659	BP	GO:0010481	epidermal cell division	5			1	1															1	1					3
1660	BP	GO:0008356	asymmetric cell division	5			1	2	1	1	1	1			0.185	3	1	1	1	1			1	1	1	1			18
1661	BP	GO:0017145	stem cell division	5			1	1	1	1	1	1	1	1	1	2	1	1	1	1									36
1662	BP	GO:0098722	asymmetric stem cell division	6					1	1					1	1	1	1	1	1									8
1663	BP	GO:0048103	somatic stem cell division	6			1	1	1	1			1	1	1	2	1	1	1	1									22
1664	BP	GO:0036445	neuronal stem cell division	7					1	1					1	1	1	1	1	1									13
1665	BP	GO:0040016	embryonic cleavage	5					1	1	1	1	1	1					1	2	0.0107	3	1	1					8
1666	BP	GO:0030029	actin filament-based process	4	1	3	8.1e-09	20	1	7	0.0406	13	1	5	6.66e-14	27	1	9	0.137	12	1	6	9.32e-16	27	1.48e-16	30	0.318	11	639
1667	BP	GO:0051014	actin filament severing	5			0.0159	3							1	2							1	1	1	2	1	2	9
1668	BP	GO:0030048	actin filament-based movement	5	1	1	1	4	1	4	1	2	1	2	0.518	5	0.427	5	0.458	5	1	3	1	4	0.00412	7	1	4	113
1669	BP	GO:0070252	actin-mediated cell contraction	6	1	1	1	2	1	4	1	2	1	2	1	2	0.179	5	1	4	1	3	1	2	0.255	5	1	4	94
1670	BP	GO:0033275	actin-myosin filament sliding	7			1	2	1	2			1	1	1	2	1	1	1	2	1	1	1	1	0.0953	4	1	1	39
1671	BP	GO:0030049	muscle filament sliding	8			1	2	1	2			1	1	1	2	1	1	1	2	1	1	1	1	0.0953	4	1	1	39
1672	BP	GO:0086003	cardiac muscle cell contraction	7	1	1			1	2	1	2	1	1			0.141	4	1	2	1	2	1	1	1	1	1	3	46
1673	BP	GO:0086002	cardiac muscle cell action potential involved in contraction	8	1	1					1	2					0.037	4	1	2	1	1	1	1			1	2	33
1674	BP	GO:0086005	ventricular cardiac muscle cell action potential	9	1	1					1	1					0.415	3	1	1	1	1	1	1			1	1	24
1675	BP	GO:0030050	vesicle transport along actin filament	6			1	1							1	1							1	1	1	1			4
1676	BP	GO:0007059	chromosome segregation	4	0.00311	10	1	6	0.0574	8	3.46e-06	13	0.00686	9	0.00311	10	0.118	8	1	6	1	5	0.0664	8	0.000503	11	1	6	279
1677	BP	GO:0007154	cell communication	4	1.6e-08	73	7.3e-24	90	4.03e-08	63	8.56e-17	89	6.91e-06	58	9.38e-26	104	7.74e-16	84	5.76e-13	80	2.2e-05	58	2.47e-14	76	2.03e-30	113	8.94e-07	63	6420
1678	BP	GO:0010643	cell communication by chemical coupling	5							1	1			1	1													3
1679	BP	GO:0010644	cell communication by electrical coupling	5							1	1			1	1									1	1			26
1680	BP	GO:0007267	cell-cell signaling	5	1	10	1	7	1	8	1	9	1	6	1	11	1	12	1	14	1	8	1	6	1	13	1	8	1229
1681	BP	GO:0099536	synaptic signaling	6	1	2	1	2	1	3	1	6	1	1	1	5	1	3	1	6	1	4	1	2	1	6	1	2	716
1682	BP	GO:0099537	trans-synaptic signaling	7	1	2	1	2	1	3	1	6	1	1	1	5	1	3	1	6	1	4	1	2	1	6	1	2	716
1683	BP	GO:0007268	synaptic transmission	8	1	2	1	2	1	3	1	6	1	1	1	5	1	3	1	6	1	4	1	2	1	6	1	2	716
1684	BP	GO:0007270	neuron-neuron synaptic transmission	9																					1	2			129
1685	BP	GO:0035249	synaptic transmission, glutamatergic	10																					1	2			64
1686	BP	GO:0001963	synaptic transmission, dopaminergic	10																					1	1			30
1687	BP	GO:0060684	epithelial-mesenchymal cell signaling	6			1	1							1	1							1	1					7
1688	BP	GO:0019226	transmission of nerve impulse	5																					1	1			72
1689	BP	GO:0019228	neuronal action potential	6																					1	1			34
1690	BP	GO:0007163	establishment or maintenance of cell polarity	4	1	4	0.176	6	1	3	0.0369	7	1	1	1.5e-06	11	1	5	1	4	1	2	0.0168	7	0.424	6	1	5	164
1691	BP	GO:0061339	establishment or maintenance of monopolar cell polarity	5							1	1			1	1	1	1			1	1	1	2	1	1	1	1	13
1692	BP	GO:0061245	establishment or maintenance of bipolar cell polarity	5			1	2	1	1	1	1			1	2	1	1			1	1	1	3	1	1	1	1	35
1693	BP	GO:0035088	establishment or maintenance of apical/basal cell polarity	6			1	2	1	1	1	1			1	2	1	1			1	1	1	3	1	1	1	1	35
1694	BP	GO:0045197	establishment or maintenance of epithelial cell apical/basal polarity	7			1	1	1	1	1	1									1	1	1	2	1	1	1	1	28
1695	BP	GO:0030010	establishment of cell polarity	5	1	1	1	3	1	2	1	2			0.0312	6	0.317	5	1	3	1	2	1	4	1	3	1	4	106
1696	BP	GO:0001767	establishment of lymphocyte polarity	6			1	2							1	1	1	1	1	1			1	1	1	1	1	1	8
1697	BP	GO:0001770	establishment of natural killer cell polarity	7													1	1	1	1									1
1698	BP	GO:0001768	establishment of T cell polarity	7			0.995	2							1	1							1	1	1	1	1	1	7
1699	BP	GO:0090162	establishment of epithelial cell polarity	6							1	1			1	1	1	1	1	1	1	1	1	2	1	1	1	1	21
1700	BP	GO:0061162	establishment of monopolar cell polarity	6							1	1			1	1	1	1			1	1	1	2	1	1	1	1	13
1701	BP	GO:0035089	establishment of apical/basal cell polarity	7							1	1			1	1	1	1			1	1	1	2	1	1	1	1	11
1702	BP	GO:0030011	maintenance of cell polarity	5					1	1																			12
1703	BP	GO:0035090	maintenance of apical/basal cell polarity	6					1	1																			8
1704	BP	GO:0045199	maintenance of epithelial cell apical/basal polarity	7					1	1																			8
1705	BP	GO:0060352	cell adhesion molecule production	4											1	1	1	1	1	1									8
1706	BP	GO:0008219	cell death	4	5.05e-09	38	1.75e-15	43	2.73e-10	36	6.58e-14	45	2.55e-10	36	5.39e-11	41	6.34e-15	45	1.26e-11	41	1.46e-08	34	3.01e-07	32	5.93e-14	46	1.42e-05	30	2026
1707	BP	GO:0070265	necrotic cell death	5			1	1					1	1	1	1									1	1			49
1708	BP	GO:0070997	neuron death	5	1	3	1	5	1	4	1	5	1	6	1	1	1	4	1	4	1	4	1	1	0.309	8	1	4	295
1709	BP	GO:0012501	programmed cell death	5	1.03e-09	38	6.53e-14	40	5.66e-11	36	1.44e-12	42	3.73e-08	32	1.03e-09	38	5.07e-15	44	2.75e-10	38	3.6e-07	31	7.89e-08	32	1.38e-10	40	6.61e-05	28	1921
1710	BP	GO:0006915	apoptotic process	6	1.53e-08	36	4.58e-14	40	4.14e-11	36	5.2e-12	41	6.28e-07	30	7.53e-10	38	2.03e-14	43	9.61e-10	37	5.3e-06	29	1.24e-06	30	9.91e-11	40	0.000201	27	1901
1711	BP	GO:0097285	cell-type specific apoptotic process	7	1	5	0.366	9	1	5	1	6	1	6	1	4	1	5	1	5	1	4	1	2	1	9	1	5	461
1712	BP	GO:0071887	leukocyte apoptotic process	8			1	2					1	1	1	2	1	1					1	1	1	2			102
1713	BP	GO:0070227	lymphocyte apoptotic process	9			1	1							1	1	1	1					1	1	1	2			71
1714	BP	GO:0070231	T cell apoptotic process	10											1	1							1	1	1	1			49
1715	BP	GO:0001783	B cell apoptotic process	10			1	1									1	1							1	1			24
1716	BP	GO:0002901	mature B cell apoptotic process	11			1	1									1	1											4
1717	BP	GO:1904019	epithelial cell apoptotic process	8			1	2	1	1	1	1							1	1					1	1	1	2	84
1718	BP	GO:0097283	keratinocyte apoptotic process	9			1	1																			1	1	4
1719	BP	GO:0097284	hepatocyte apoptotic process	9			1	1			1	1															1	1	14
1720	BP	GO:0072577	endothelial cell apoptotic process	9			1	1	1	1									1	1					1	1	1	1	47
1721	BP	GO:0010657	muscle cell apoptotic process	8			1	3					1	1	1	2	1	1	1	1					1	2	1	1	52
1722	BP	GO:0010658	striated muscle cell apoptotic process	9			1	2							1	1	1	1	1	1					1	2	1	1	28
1723	BP	GO:0010659	cardiac muscle cell apoptotic process	10			1	2									1	1	1	1					1	1	1	1	25
1724	BP	GO:0034390	smooth muscle cell apoptotic process	9			1	1					1	1	1	1													15
1725	BP	GO:0033028	myeloid cell apoptotic process	8			1	2					1	1	1	1	1	1											31
1726	BP	GO:0044346	fibroblast apoptotic process	8	1	2					1	1	1	1															19
1727	BP	GO:0006925	inflammatory cell apoptotic process	8			1	1					1	1	1	1													19
1728	BP	GO:0071888	macrophage apoptotic process	9			1	1					1	1	1	1													11
1729	BP	GO:0051402	neuron apoptotic process	8	1	3	1	4	1	4	1	4	1	4	1	1	1	3	1	3	1	4	1	1	1	4	1	2	226
1730	BP	GO:0043276	anoikis	7									1	2	1	1	1	1	1	2	1	1	1	1					28
1731	BP	GO:1902742	apoptotic process involved in development	7	1	1	1	2									1	2			1	1	1	1	1	2			32
1732	BP	GO:0097300	programmed necrotic cell death	6			1	1							1	1									1	1			41
1733	BP	GO:0070266	necroptotic process	7			1	1							1	1									1	1			35
1734	BP	GO:0033059	cellular pigmentation	4			1	1	1	1					1	3	1	1	1	2					0.236	4	1	1	49
1735	BP	GO:0051875	pigment granule localization	5			1	1	1	1					1	2	1	1	1	2					0.0183	4			26
1736	BP	GO:0051905	establishment of pigment granule localization	6			1	1	1	1					1	2	1	1	1	2					0.0131	4			24
1737	BP	GO:0032400	melanosome localization	6			1	1	1	1					1	2	1	1	1	2					0.0155	4			25
1738	BP	GO:0032401	establishment of melanosome localization	7			1	1	1	1					1	2	1	1	1	2					0.0109	4			23
1739	BP	GO:0051904	pigment granule transport	6			1	1	1	1					1	2	1	1	1	2					0.0109	4			23
1740	BP	GO:0032402	melanosome transport	7			1	1	1	1					1	2	1	1	1	2					0.00908	4			22
1741	BP	GO:0022402	cell cycle process	4	5.27e-21	45	9.57e-18	38	3.04e-06	24	1.15e-16	40	6.51e-18	38	4.85e-14	37	0.113	18	0.0131	20	0.00214	20	2.41e-11	31	4.89e-16	40	4.61e-07	26	1319
1742	BP	GO:0098813	nuclear chromosome segregation	5	0.0275	8	0.79	6	0.756	6	2.51e-05	11	0.786	6	1	6	1	6	1	3	1	3	0.831	6	0.00398	9	0.99	6	216
1743	BP	GO:0051310	metaphase plate congression	6	1	2					0.121	4	1	2					1	1	1	2	1	2	1	3	1	2	43
1744	BP	GO:0051305	chromosome movement towards spindle pole	5			1	1			1	1			1	2							1	1	1	2			7
1745	BP	GO:0000075	cell cycle checkpoint	5	1	6	1	3	0.216	7	8.69e-07	13	1	4	1	3	1	5	1	1	1	2	1	2	1	5	1	4	249
1746	BP	GO:0031570	DNA integrity checkpoint	6	1	5	1	3	1	4	0.0399	7	1	3	1	2	1	2			1	1	1	1	1	2	1	2	166
1747	BP	GO:0031577	spindle checkpoint	6					1	1	0.297	4	1	1	1	1	0.265	4	1	1					1	2	1	2	54
1748	BP	GO:0071173	spindle assembly checkpoint	7							0.158	4	1	1	1	1	0.141	4	1	1					1	2	1	2	46
1749	BP	GO:0044770	cell cycle phase transition	5	1.88e-06	17	0.739	9	0.133	10	1.7e-06	17	8.88e-06	15	0.0206	12	1	9	1	8	1	4	0.00461	12	3.09e-06	17	1	7	507
1750	BP	GO:0044839	cell cycle G2/M phase transition	6	0.946	6	0.00478	8	1	3	0.0134	8	0.0505	7	0.0141	8	1	2	1	3	1	1	0.507	6	0.00186	9	1	2	197
1751	BP	GO:0044843	cell cycle G1/S phase transition	6	1.69e-05	12	1	3	1	4	0.639	7	0.0347	8	1	5	1	3	1	3	1	2	1	3	0.126	8	1	2	259
1752	BP	GO:0000910	cytokinesis	5	1	5	0.00197	8	1	2	1	3	0.0234	7	0.0584	7	1	2	1	5	1	2	0.266	6	1	3	1	5	175
1753	BP	GO:0061640	cytoskeleton-dependent cytokinesis	6	1	2	1	2	1	1	1	2	1	2	0.0929	4	1	1	1	2			1	1	1	1	1	2	40
1754	BP	GO:1903047	mitotic cell cycle process	5	4.3e-20	37	1.19e-13	28	9.17e-06	19	1.91e-13	30	9.37e-16	30	4.86e-09	25	0.505	13	0.167	14	0.0495	14	5.09e-08	22	7.14e-14	31	0.000767	17	865
1755	BP	GO:0044772	mitotic cell cycle phase transition	6	7e-06	16	0.518	9	0.487	9	0.000318	14	3.91e-05	14	0.0127	12	1	8	1	8	1	3	0.018	11	1.12e-05	16	1	6	483
1756	BP	GO:0000082	G1/S transition of mitotic cell cycle	7	1.14e-05	12	1	3	1	3	1	6	0.0268	8	1	5	1	2	1	3	1	2	1	3	0.0983	8	1	1	250
1757	BP	GO:0000086	G2/M transition of mitotic cell cycle	7	0.849	6	0.0041	8	1	3	0.0115	8	0.0442	7	0.0121	8	1	2	1	3			0.454	6	0.0154	8	1	2	193
1758	BP	GO:0000281	mitotic cytokinesis	6	1	2	1	1	1	1	1	1	1	2	1	2	1	1	1	2							1	2	31
1759	BP	GO:0051304	chromosome separation	5					1	2	0.098	5	1	1	1	1	1	4	1	1	1	1			1	2	1	2	80
1760	BP	GO:0032506	cytokinetic process	5					1	1					1	1			1	1							1	1	14
1761	BP	GO:0036089	cleavage furrow formation	6					1	1					1	1			1	1							1	1	7
1762	BP	GO:0051653	spindle localization	5	1	1	1	3			1	2			0.0929	4			1	1			1	3	0.105	4			40
1763	BP	GO:0016049	cell growth	4	1	7	0.12	10	1	8	1	7	1	6	0.0881	11	1	7	1	8	1	8	0.7	9	0.118	11	1	8	497
1764	BP	GO:0048869	cellular developmental process	4	5.49e-05	48	7.23e-26	75	9.29e-11	53	6.97e-09	56	6.91e-06	44	3.86e-13	64	6.35e-16	66	4.12e-14	64	1.44e-08	50	1.37e-18	66	1.81e-18	74	2.09e-08	51	4112
1765	BP	GO:0030154	cell differentiation	5	2.17e-05	47	1.26e-23	70	2.98e-11	52	6.99e-08	52	0.00235	37	7.29e-14	63	4.93e-16	64	1.35e-13	61	2.31e-07	46	1.25e-18	64	9.61e-19	72	8.78e-08	48	3859
1766	BP	GO:0090077	foam cell differentiation	6							1	1																	31
1767	BP	GO:0010742	macrophage derived foam cell differentiation	7							1	1																	31
1768	BP	GO:0061318	renal filtration cell differentiation	6													1	1	1	1									17
1769	BP	GO:0045444	fat cell differentiation	6	1	1	1	1	1	2	1	2					1	1	1	1	1	1	1	2	1	1			203
1770	BP	GO:0050872	white fat cell differentiation	7																			1	2					14
1771	BP	GO:0050873	brown fat cell differentiation	7													1	1											42
1772	BP	GO:0048863	stem cell differentiation	6	1	4	1	6	1	5	1	2	1	2	1	4	1	4	1	5	1	4	1	3	1	7	1	2	281
1773	BP	GO:0048762	mesenchymal cell differentiation	7			1	4	1	3	1	1	1	1	1	3			1	2			1	2	1	3			188
1774	BP	GO:0014033	neural crest cell differentiation	8											1	2			1	2			1	1					80
1775	BP	GO:0050931	pigment cell differentiation	6					1	1	1	1							1	1	1	1					1	1	36
1776	BP	GO:0048773	erythrophore differentiation	7					1	1	1	1							1	1	1	1							1
1777	BP	GO:0042692	muscle cell differentiation	6	1	5	0.0639	9	1	4	1	7	1	4	0.0343	10	1	5	1	6	1	3	0.00129	11	0.00725	11	1	3	367
1778	BP	GO:0045445	myoblast differentiation	7	1	1	1	1			1	1			1	2	1	1	1	1			1	3	1	1			82
1779	BP	GO:0051146	striated muscle cell differentiation	7	1	3	1	5	1	1	1	5	1	4	0.635	7	1	1	1	4	1	2	0.296	7	0.002	10	1	2	257
1780	BP	GO:0014902	myotube differentiation	8	1	1	1	1							1	2							1	1	1	3			111
1781	BP	GO:0030855	epithelial cell differentiation	6	1	6	0.000119	15	1	6	1	6	1	3	1	8	0.338	11	1	9	1	9	0.00559	13	0.00819	14	0.971	10	612
1782	BP	GO:0002065	columnar/cuboidal epithelial cell differentiation	7	1	1	1	3	1	1	1	1	1	1			1	2			1	2	1	4	1	3	1	3	142
1783	BP	GO:0002067	glandular epithelial cell differentiation	8	1	1							1	1			1	1			1	1	1	2			1	1	49
1784	BP	GO:0060563	neuroepithelial cell differentiation	8	1	1	1	1			1	1	1	1			1	2			1	2	1	3	1	2	1	2	85
1785	BP	GO:0061101	neuroendocrine cell differentiation	9	1	1							1	1			1	1			1	1	1	1			1	1	9
1786	BP	GO:0060129	thyroid-stimulating hormone-secreting cell differentiation	10	1	1							1	1			1	1			1	1	1	1			1	1	4
1787	BP	GO:0060575	intestinal epithelial cell differentiation	8			1	2	1	1															1	1	1	1	18
[truncated: 7,664 more rows]
