# Supplementary material for: Extensive cargo identification reveals distinct biological roles of the 12 importin pathways
Source: eLife. 2017 Jan 24;6:e21184. doi: 10.7554/eLife.21184 (PMC5305215; doi:10.7554/eLife.21184)
Supplement: Supplementary file 7. — With respect to each NTR, the accessions of the 3rd-Z-4% cargoes annotated with each GO term are listed. Cyan, significant term enrichment (p<0.05) in the 3rd-Z-4% cargoes of the NTR. Total No. represents the number of proteins annotated with each term in the database. Supplementary files 6B and 9 were derived from this table. For the 2nd-Z-15% cargoes, see Supplementary file 8. DOI: http://dx.doi.org/10.7554/eLife.21184.023 [file elife-21184-supp7.xlsx]

## Sheet: Legend
Supplementary file 7
The 3rd-Z-4% cargoes annotated with Gene Ontology (GO) terms
With respect to each NTR, the accessions of the 3rd-Z-4% cargoes annotated with each GO term are listed. Cyan, significant term enrichment (p<0.05) in the 3rd-Z-4% cargoes of the NTR. Total No. represents the number of proteins annotated with each term in the database. Supplementary files 6B and 9 were derived from this table. For the 2nd-Z-15% cargoes, see Supplementary file 8.
Imp-β	Trn-1	Trn-2	Trn-SR	Imp-4	Imp-5
Imp-7	Imp-8	Imp-9	Imp-11	Imp-13	Exp-4
(13 sheets including this one)

## Sheet: Imp-β
Imp-β 3rd-Z-4% Cargoes (63 Proteins)
p-Value	Total No.	No. of 3rd-Z-4% Cargoes	Term ID	Term Type	Term Name	Term Depth	Accession
1.03e-23	16994	57	GO:0008150	BP	biological_process	1	P51948,P04181,Q969G3,Q15054,Q9BXP5,Q92945,Q9ULW0,Q9P2N5,Q6P6C2,O00541,Q9HCK8,Q9NV56,O43148,P49711,P56270,Q02218,P49005,Q9Y657,Q99567,Q9H6F5,O14776,P52298,Q15651,Q9NRZ9,P54278,P35269,P35658,Q8NBJ7,O60832,Q09161,P17096,Q9NWH9,Q9NZM1,O00622,Q8WVV9,P25705,O14979,Q00839,P02545,O15042,Q9BZZ5,Q15072,Q2NL82,Q9BTL3,P17028,P18754,P34897,P52292,Q13330,Q9BUI4,P13984,Q86U38,O75717,Q86U70,Q1KMD3,Q9BW19,Q92804
0.0319	7212	20	GO:0032501	BP	multicellular organismal process	2	P51948,P04181,Q969G3,Q9BXP5,Q6P6C2,Q9HCK8,Q02218,Q9Y657,Q9NRZ9,P54278,Q9NZM1,O00622,P25705,Q00839,P02545,P17028,Q13330,Q9BUI4,Q86U70,Q9BW19
1	2065	2	GO:0003008	BP	system process	3	P04181,Q9NZM1
1	398	1	GO:0003012	BP	muscle system process	4	Q9NZM1
1	328	1	GO:0006936	BP	muscle contraction	5	Q9NZM1
1	1347	1	GO:0050877	BP	neurological system process	4	P04181
1	995	1	GO:0007600	BP	sensory perception	5	P04181
1	215	1	GO:0050953	BP	sensory perception of light stimulus	6	P04181
1	212	1	GO:0007601	BP	visual perception	7	P04181
1	521	1	GO:0003013	BP	circulatory system process	4	Q9NZM1
1	518	1	GO:0008015	BP	blood circulation	5	Q9NZM1
1	1467	2	GO:0022610	BP	biological adhesion	2	O00622,Q86U70
1	1461	2	GO:0007155	BP	cell adhesion	3	O00622,Q86U70
1	311	1	GO:0031589	BP	cell-substrate adhesion	4	O00622
1	906	1	GO:0098609	BP	cell-cell adhesion	4	O00622
0.409	5934	16	GO:0032502	BP	developmental process	2	P51948,Q969G3,Q9BXP5,Q6P6C2,Q9HCK8,Q02218,Q9Y657,Q9NRZ9,P54278,P17096,O00622,P25705,Q00839,P02545,P17028,Q86U70
1	5272	12	GO:0048856	BP	anatomical structure development	3	P51948,Q969G3,Q9BXP5,Q9HCK8,Q02218,Q9NRZ9,P54278,O00622,P25705,P02545,P17028,Q86U70
1	1807	4	GO:0009888	BP	tissue development	4	Q02218,O00622,P02545,Q86U70
1	1125	2	GO:0060429	BP	epithelium development	5	O00622,Q86U70
1	318	1	GO:0008544	BP	epidermis development	6	Q86U70
1	362	1	GO:0060537	BP	muscle tissue development	5	P02545
1	348	1	GO:0014706	BP	striated muscle tissue development	6	P02545
1	245	2	GO:0061448	BP	connective tissue development	5	O00622,P02545
1	170	2	GO:0098727	BP	maintenance of cell number	3	Q9BXP5,Q86U70
1	2805	2	GO:0009653	BP	anatomical structure morphogenesis	3	O00622,Q86U70
1	1184	2	GO:0048646	BP	anatomical structure formation involved in morphogenesis	3	O00622,Q86U70
0.952	5739	15	GO:0051179	BP	localization	2	Q92945,Q6P6C2,O00541,Q02218,Q99567,P52298,Q15651,P35658,O60832,Q09161,O00622,P25705,P02545,P52292,Q9BW19
1	1320	3	GO:0051674	BP	localization of cell	3	Q02218,O00622,P02545
1	4711	12	GO:0051234	BP	establishment of localization	3	Q92945,Q6P6C2,Q99567,P52298,Q15651,P35658,O60832,Q09161,P25705,P02545,P52292,Q9BW19
1	4571	10	GO:0006810	BP	transport	4	Q92945,Q6P6C2,Q99567,P52298,Q15651,P35658,Q09161,P25705,P02545,P52292
0.0356	807	7	GO:0071705	BP	nitrogen compound transport	5	Q92945,Q6P6C2,Q99567,P52298,Q15651,P35658,Q09161
1	2637	9	GO:0071702	BP	organic substance transport	5	Q92945,Q6P6C2,Q99567,P52298,Q15651,P35658,Q09161,P02545,P52292
0.0001	194	6	GO:0015931	BP	nucleobase-containing compound transport	6	Q92945,Q6P6C2,Q99567,P52298,P35658,Q09161
3.31e-05	161	6	GO:0050657	BP	nucleic acid transport	7	Q92945,Q6P6C2,Q99567,P52298,P35658,Q09161
0.213	2805	11	GO:0033036	BP	macromolecule localization	3	Q92945,Q6P6C2,O00541,Q99567,P52298,Q15651,P35658,O60832,Q09161,P02545,P52292
2.54e-06	195	7	GO:0006403	BP	RNA localization	4	Q92945,Q6P6C2,Q99567,P52298,P35658,O60832,Q09161
1	16	1	GO:0090672	BP	telomerase RNA localization	5	O60832
1	16	1	GO:0090670	BP	RNA localization to Cajal body	5	O60832
1	16	1	GO:0090671	BP	telomerase RNA localization to Cajal body	6	O60832
3.57e-05	163	6	GO:0051236	BP	establishment of RNA localization	5	Q92945,Q6P6C2,Q99567,P52298,P35658,Q09161
3.31e-05	161	6	GO:0050658	BP	RNA transport	6	Q92945,Q6P6C2,Q99567,P52298,P35658,Q09161
1.15e-05	135	6	GO:0051028	BP	mRNA transport	7	Q92945,Q6P6C2,Q99567,P52298,P35658,Q09161
1	2445	7	GO:0008104	BP	protein localization	4	O00541,Q99567,Q15651,P35658,O60832,P02545,P52292
1	2012	6	GO:0045184	BP	establishment of protein localization	5	Q99567,Q15651,P35658,O60832,P02545,P52292
1	1862	5	GO:0015031	BP	protein transport	5	Q99567,Q15651,P35658,P02545,P52292
0.0934	3044	12	GO:0051641	BP	cellular localization	3	Q6P6C2,O00541,Q99567,P52298,Q15651,P35658,O60832,Q09161,P25705,P02545,P52292,Q9BW19
0.00011	97	5	GO:0071166	BP	ribonucleoprotein complex localization	4	Q6P6C2,Q99567,P52298,P35658,Q09161
1	1549	6	GO:0070727	BP	cellular macromolecule localization	4	O00541,Q99567,P35658,O60832,P02545,P52292
1	1538	6	GO:0034613	BP	cellular protein localization	5	O00541,Q99567,P35658,O60832,P02545,P52292
0.559	884	6	GO:0033365	BP	protein localization to organelle	6	O00541,Q99567,P35658,O60832,P02545,P52292
0.963	354	4	GO:0034504	BP	protein localization to nucleus	7	Q99567,P35658,P02545,P52292
1	58	1	GO:0034502	BP	protein localization to chromosome	7	O60832
1	25	1	GO:0070198	BP	protein localization to chromosome, telomeric region	8	O60832
1	667	5	GO:0072594	BP	establishment of protein localization to organelle	7	Q99567,P35658,O60832,P02545,P52292
1	23	1	GO:0070199	BP	establishment of protein localization to chromosome	8	O60832
1	15	1	GO:0070200	BP	establishment of protein localization to telomere	9	O60832
1	466	2	GO:0051640	BP	organelle localization	4	Q99567,Q9BW19
1	8	1	GO:0033750	BP	ribosome localization	5	Q99567
1	61	1	GO:0050000	BP	chromosome localization	5	Q9BW19
1	355	2	GO:0051656	BP	establishment of organelle localization	5	Q99567,Q9BW19
0.603	2640	10	GO:0051649	BP	establishment of localization in cell	4	Q6P6C2,Q99567,P52298,Q15651,P35658,Q09161,P25705,P02545,P52292,Q9BW19
1	8	1	GO:0033753	BP	establishment of ribosome localization	5	Q99567
1	1905	8	GO:0046907	BP	intracellular transport	5	Q6P6C2,Q99567,P52298,P35658,Q09161,P25705,P02545,P52292
0.562	1257	7	GO:0016482	BP	cytoplasmic transport	6	Q6P6C2,Q99567,P52298,P35658,Q09161,P02545,P52292
0.000696	443	7	GO:0051169	BP	nuclear transport	6	Q6P6C2,Q99567,P52298,P35658,Q09161,P02545,P52292
0.000645	438	7	GO:0006913	BP	nucleocytoplasmic transport	7	Q6P6C2,Q99567,P52298,P35658,Q09161,P02545,P52292
0.00122	157	5	GO:0051168	BP	nuclear export	8	Q6P6C2,Q99567,P52298,P35658,Q09161
0.000105	96	5	GO:0006405	BP	RNA export from nucleus	9	Q6P6C2,Q99567,P52298,P35658,Q09161
0.402	281	4	GO:0051170	BP	nuclear import	8	Q99567,P35658,P02545,P52292
1	1022	4	GO:0006886	BP	intracellular protein transport	6	Q99567,P35658,P02545,P52292
1	61	1	GO:0051303	BP	establishment of chromosome localization	5	Q9BW19
1	6347	12	GO:0023052	BP	signaling	2	Q9HCK8,Q9Y657,Q99567,Q15651,Q9NRZ9,P35658,Q9NZM1,O00622,P02545,P52292,Q13330,Q86U70
1	1004	3	GO:0040007	BP	growth	2	Q9NV56,Q09161,O00622
1	2673	6	GO:0002376	BP	immune system process	2	Q6P6C2,Q9NRZ9,P54278,P34897,Q9BUI4,Q86U70
1	796	2	GO:0002252	BP	immune effector process	3	Q6P6C2,Q9BUI4
1	159	1	GO:0002440	BP	production of molecular mediator of immune response	3	P54278
1	92	1	GO:0002377	BP	immunoglobulin production	4	P54278
0.00242	8574	24	GO:0050896	BP	response to stimulus	2	P51948,Q15054,Q9BXP5,Q6P6C2,Q9HCK8,P49005,Q9Y657,Q99567,Q15651,Q9NRZ9,P54278,P35269,P35658,P17096,Q9NZM1,O00622,Q00839,P02545,P34897,P52292,Q13330,Q9BUI4,Q86U70,Q9BW19
1	1747	2	GO:0009719	BP	response to endogenous stimulus	3	O00622,Q00839
1	1312	2	GO:0071495	BP	cellular response to endogenous stimulus	4	O00622,Q00839
0.859	4445	13	GO:0042221	BP	response to chemical	3	P51948,Q9BXP5,Q99567,Q15651,P54278,P35658,Q9NZM1,O00622,Q00839,P02545,P34897,P52292,Q13330
1	1660	3	GO:1901700	BP	response to oxygen-containing compound	4	Q15651,Q00839,Q13330
1	1087	1	GO:1901698	BP	response to nitrogen compound	4	Q9BXP5
1	449	1	GO:0042493	BP	response to drug	4	P54278
1	28	1	GO:0046685	BP	response to arsenic-containing substance	4	Q9BXP5
1	519	1	GO:0010035	BP	response to inorganic substance	4	P51948
1	349	1	GO:0010038	BP	response to metal ion	5	P51948
1	120	1	GO:0051592	BP	response to calcium ion	6	P51948
0.393	3009	11	GO:0010033	BP	response to organic substance	4	Q9BXP5,Q99567,Q15651,P35658,Q9NZM1,O00622,Q00839,P02545,P34897,P52292,Q13330
1	175	1	GO:1901654	BP	response to ketone	5	Q00839
1	952	2	GO:0070848	BP	response to growth factor	5	Q9NZM1,O00622
1	156	1	GO:0071772	BP	response to BMP	6	O00622
1	873	2	GO:0033993	BP	response to lipid	5	Q00839,Q13330
1	890	2	GO:0014070	BP	response to organic cyclic compound	5	Q9BXP5,Q00839
1	78	1	GO:0043331	BP	response to dsRNA	6	Q9BXP5
1	862	4	GO:0034097	BP	response to cytokine	5	Q99567,P35658,P34897,P52292
1	227	1	GO:0009743	BP	response to carbohydrate	5	Q15651
1	200	1	GO:0034284	BP	response to monosaccharide	6	Q15651
1	191	1	GO:0009746	BP	response to hexose	7	Q15651
1	186	1	GO:0009749	BP	response to glucose	8	Q15651
1	1080	1	GO:0009725	BP	response to hormone	5	Q00839
1	450	1	GO:0048545	BP	response to steroid hormone	6	Q00839
1	181	1	GO:0031960	BP	response to corticosteroid	7	Q00839
1	169	1	GO:0051384	BP	response to glucocorticoid	8	Q00839
1	380	1	GO:0097305	BP	response to alcohol	5	Q00839
1	34	1	GO:0071548	BP	response to dexamethasone	6	Q00839
1	1226	6	GO:0009628	BP	response to abiotic stimulus	3	Q6P6C2,Q99567,P35658,Q9NZM1,P02545,Q13330
1	334	2	GO:0070482	BP	response to oxygen levels	4	Q6P6C2,P02545
1	316	2	GO:0036293	BP	response to decreased oxygen levels	5	Q6P6C2,P02545
1	511	1	GO:0009314	BP	response to radiation	4	Q13330
1	374	1	GO:0009416	BP	response to light stimulus	5	Q13330
1	24	1	GO:0009648	BP	photoperiodism	6	Q13330
1	149	1	GO:0010212	BP	response to ionizing radiation	5	Q13330
1	234	3	GO:0009266	BP	response to temperature stimulus	4	Q99567,P35658,Q9NZM1
1	772	2	GO:0051606	BP	detection of stimulus	3	Q15054,P49005
1	984	5	GO:0009607	BP	response to biotic stimulus	3	Q6P6C2,P35269,P17096,Q13330,Q9BUI4
0.00432	4101	16	GO:0006950	BP	response to stress	3	P51948,Q15054,Q6P6C2,P49005,Q99567,P54278,P35658,P17096,Q9NZM1,O00622,P02545,P34897,P52292,Q13330,Q9BUI4,Q9BW19
1	181	1	GO:0035966	BP	response to topologically incorrect protein	4	P02545
1	170	1	GO:0006986	BP	response to unfolded protein	5	P02545
1	1867	4	GO:0006952	BP	defense response	4	Q6P6C2,P34897,Q13330,Q9BUI4
1	656	1	GO:0006954	BP	inflammatory response	5	Q13330
1	11	1	GO:0006991	BP	response to sterol depletion	4	P02545
1	1078	4	GO:0009611	BP	response to wounding	4	Q9NZM1,O00622,Q13330,Q9BW19
1	753	3	GO:0042060	BP	wound healing	5	Q9NZM1,O00622,Q9BW19
1	169	3	GO:0009408	BP	response to heat	4	Q99567,P35658,Q9NZM1
1	307	2	GO:0001666	BP	response to hypoxia	4	Q6P6C2,P02545
1	2565	7	GO:0009605	BP	response to external stimulus	3	Q6P6C2,P35269,P17096,O00622,P02545,Q13330,Q9BUI4
1	947	5	GO:0043207	BP	response to external biotic stimulus	4	Q6P6C2,P35269,P17096,Q13330,Q9BUI4
1	221	1	GO:0009612	BP	response to mechanical stimulus	4	P02545
1	1728	2	GO:0006955	BP	immune response	3	P34897,Q9BUI4
1	1140	2	GO:0045087	BP	innate immune response	4	P34897,Q9BUI4
1	85	1	GO:0034340	BP	response to type I interferon	5	P34897
4.86e-08	2473	18	GO:0051704	BP	multi-organism process	2	P51948,Q6P6C2,O43148,Q9Y657,Q99567,Q9H6F5,P52298,P35269,P35658,Q09161,P17096,P02545,P18754,P52292,Q13330,Q9BUI4,P13984,Q9BW19
9.37e-08	841	12	GO:0044419	BP	interspecies interaction between organisms	3	P51948,O43148,Q99567,Q9H6F5,P52298,P35269,P35658,Q09161,P17096,P18754,P52292,P13984
9.37e-08	841	12	GO:0044403	BP	symbiosis, encompassing mutualism through parasitism	4	P51948,O43148,Q99567,Q9H6F5,P52298,P35269,P35658,Q09161,P17096,P18754,P52292,P13984
1	193	3	GO:0051701	BP	interaction with host	4	Q99567,P35658,P52292
1	947	5	GO:0051707	BP	response to other organism	3	Q6P6C2,P35269,P17096,Q13330,Q9BUI4
1	563	1	GO:0009617	BP	response to bacterium	4	Q13330
1	343	1	GO:0002237	BP	response to molecule of bacterial origin	5	Q13330
1	330	1	GO:0032496	BP	response to lipopolysaccharide	6	Q13330
1	417	4	GO:0009615	BP	response to virus	4	Q6P6C2,P35269,P17096,Q9BUI4
1	583	2	GO:0098542	BP	defense response to other organism	4	Q6P6C2,Q9BUI4
1	333	2	GO:0051607	BP	defense response to virus	5	Q6P6C2,Q9BUI4
3.61e-23	15371	55	GO:0009987	BP	cellular process	2	P51948,P04181,Q969G3,Q15054,Q9BXP5,Q92945,Q9ULW0,Q9P2N5,Q6P6C2,O00541,Q9HCK8,Q9NV56,O43148,P49711,P56270,Q02218,P49005,Q9Y657,Q99567,Q9H6F5,O14776,P52298,Q15651,Q9NRZ9,P54278,P35269,P35658,Q8NBJ7,O60832,Q09161,P17096,Q9NWH9,Q9NZM1,O00622,Q8WVV9,P25705,O14979,Q00839,P02545,O15042,Q9BZZ5,Q15072,Q2NL82,Q9BTL3,P17028,P18754,P34897,P52292,Q13330,Q9BUI4,P13984,O75717,Q86U70,Q9BW19,Q92804
1	522	1	GO:0006914	BP	autophagy	3	Q6P6C2
1	358	1	GO:0016236	BP	macroautophagy	4	Q6P6C2
1	108	1	GO:0098792	BP	xenophagy	5	Q6P6C2
6.45e-08	814	12	GO:0044764	BP	multi-organism cellular process	3	P51948,O43148,Q99567,Q9H6F5,P52298,P35269,P35658,Q09161,P17096,P18754,P52292,P13984
5.36e-08	801	12	GO:0016032	BP	viral process	4	P51948,O43148,Q99567,Q9H6F5,P52298,P35269,P35658,Q09161,P17096,P18754,P52292,P13984
1	11	1	GO:0019042	BP	viral latency	5	P17096
3.63e-05	447	8	GO:0019058	BP	viral life cycle	5	P51948,Q99567,P52298,P35269,P35658,Q09161,P52292,P13984
1	10	1	GO:0019043	BP	establishment of viral latency	5	P17096
1	8	1	GO:0075713	BP	establishment of integrated proviral latency	6	P17096
0.114	7207	19	GO:0051716	BP	cellular response to stimulus	3	P51948,Q15054,Q9BXP5,Q9HCK8,P49005,Q9Y657,Q99567,Q15651,Q9NRZ9,P54278,P35658,P17096,Q9NZM1,O00622,Q00839,P02545,P52292,Q13330,Q86U70
1	2852	9	GO:0070887	BP	cellular response to chemical stimulus	4	Q9BXP5,Q99567,Q15651,P35658,Q9NZM1,O00622,Q00839,P02545,P52292
1	735	1	GO:1901699	BP	cellular response to nitrogen compound	5	Q9BXP5
1	1102	2	GO:1901701	BP	cellular response to oxygen-containing compound	5	Q15651,Q00839
1	74	1	GO:1901655	BP	cellular response to ketone	6	Q00839
1	2347	9	GO:0071310	BP	cellular response to organic substance	5	Q9BXP5,Q99567,Q15651,P35658,Q9NZM1,O00622,Q00839,P02545,P52292
1	126	1	GO:0097306	BP	cellular response to alcohol	6	Q00839
1	434	1	GO:0071396	BP	cellular response to lipid	6	Q00839
1	927	2	GO:0071363	BP	cellular response to growth factor stimulus	6	Q9NZM1,O00622
1	156	1	GO:0071773	BP	cellular response to BMP stimulus	7	O00622
1	425	2	GO:0071407	BP	cellular response to organic cyclic compound	6	Q9BXP5,Q00839
1	42	1	GO:0071359	BP	cellular response to dsRNA	7	Q9BXP5
1	760	3	GO:0071345	BP	cellular response to cytokine stimulus	6	Q99567,P35658,P52292
1	744	1	GO:0032870	BP	cellular response to hormone stimulus	6	Q00839
1	168	1	GO:0071383	BP	cellular response to steroid hormone stimulus	7	Q00839
1	63	1	GO:0071384	BP	cellular response to corticosteroid stimulus	8	Q00839
1	59	1	GO:0071385	BP	cellular response to glucocorticoid stimulus	9	Q00839
1	28	1	GO:0071549	BP	cellular response to dexamethasone stimulus	10	Q00839
1	134	1	GO:0071322	BP	cellular response to carbohydrate stimulus	6	Q15651
1	124	1	GO:0071326	BP	cellular response to monosaccharide stimulus	7	Q15651
1	122	1	GO:0071331	BP	cellular response to hexose stimulus	8	Q15651
1	156	1	GO:0071453	BP	cellular response to oxygen levels	5	P02545
1	147	1	GO:0036294	BP	cellular response to decreased oxygen levels	6	P02545
0.00818	1968	11	GO:0033554	BP	cellular response to stress	4	P51948,Q15054,P49005,Q99567,P54278,P35658,P17096,Q9NZM1,P02545,P52292,Q13330
1	10	1	GO:0071501	BP	cellular response to sterol depletion	5	P02545
0.0367	811	7	GO:0006974	BP	cellular response to DNA damage stimulus	5	P51948,Q15054,P49005,P54278,P17096,P52292,Q13330
1	36	2	GO:0042769	BP	DNA damage response, detection of DNA damage	6	Q15054,P49005
1	259	1	GO:0034976	BP	response to endoplasmic reticulum stress	5	P02545
0.439	113	3	GO:0034605	BP	cellular response to heat	5	Q99567,P35658,Q9NZM1
1	141	1	GO:0035967	BP	cellular response to topologically incorrect protein	5	P02545
1	132	1	GO:0034620	BP	cellular response to unfolded protein	6	P02545
1	140	1	GO:0071456	BP	cellular response to hypoxia	5	P02545
1	1853	3	GO:0040011	BP	locomotion	2	Q02218,O00622,P02545
1	870	1	GO:0042330	BP	taxis	3	O00622
1	870	1	GO:0006935	BP	chemotaxis	4	O00622
1	1403	5	GO:0000003	BP	reproduction	2	Q6P6C2,Q9Y657,O00622,P02545,Q9BW19
1	823	4	GO:0032504	BP	multicellular organism reproduction	3	Q6P6C2,Q9Y657,P02545,Q9BW19
8.13e-13	6327	32	GO:0071840	BP	cellular component organization or biogenesis	2	P51948,P04181,Q969G3,Q15054,Q9ULW0,O00541,Q9HCK8,Q9NV56,P49711,P49005,Q9Y657,Q99567,P52298,Q15651,Q9NRZ9,P35658,O60832,Q09161,P17096,Q9NZM1,O00622,Q00839,P02545,Q2NL82,Q9BTL3,P18754,P34897,Q13330,P13984,O75717,Q86U70,Q9BW19
1.75e-08	2671	19	GO:0044085	BP	cellular component biogenesis	3	P51948,P04181,Q9ULW0,O00541,P49711,Q99567,P52298,Q9NRZ9,O60832,Q09161,P17096,O00622,Q2NL82,Q9BTL3,P18754,P34897,P13984,Q86U70,Q9BW19
0.167	1400	8	GO:0070271	BP	protein complex biogenesis	4	P51948,P04181,Q9ULW0,P17096,P18754,P34897,P13984,Q9BW19
0.000257	382	7	GO:0022613	BP	ribonucleoprotein complex biogenesis	4	O00541,Q99567,P52298,O60832,Q09161,Q2NL82,Q9BTL3
0.203	235	4	GO:0042254	BP	ribosome biogenesis	5	O00541,Q99567,O60832,Q2NL82
1	43	1	GO:0042273	BP	ribosomal large subunit biogenesis	5	O00541
4.51e-13	6199	32	GO:0016043	BP	cellular component organization	3	P51948,P04181,Q969G3,Q15054,Q9ULW0,O00541,Q9HCK8,Q9NV56,P49711,P49005,Q9Y657,Q99567,P52298,Q15651,Q9NRZ9,P35658,O60832,Q09161,P17096,Q9NZM1,O00622,Q00839,P02545,Q2NL82,Q9BTL3,P18754,P34897,Q13330,P13984,O75717,Q86U70,Q9BW19
9.44e-12	2636	22	GO:0043933	BP	macromolecular complex subunit organization	4	P51948,P04181,Q969G3,Q9ULW0,Q9HCK8,Q9NV56,P49711,Q9Y657,P52298,Q15651,Q9NRZ9,Q09161,P17096,Q2NL82,Q9BTL3,P18754,P34897,Q13330,P13984,O75717,Q86U70,Q9BW19
0.00638	220	5	GO:0071824	BP	protein-DNA complex subunit organization	5	Q969G3,P49711,Q9NRZ9,P17096,P13984
0.139	213	4	GO:0071826	BP	ribonucleoprotein complex subunit organization	5	P52298,Q09161,Q2NL82,Q9BTL3
0.0361	1879	10	GO:0071822	BP	protein complex subunit organization	5	P51948,P04181,Q969G3,Q9ULW0,P49711,P17096,P18754,P34897,P13984,Q9BW19
1	1129	4	GO:0061024	BP	membrane organization	4	Q99567,P35658,Q9NZM1,P02545
1	546	4	GO:0010256	BP	endomembrane system organization	4	Q99567,P35658,Q9NZM1,P02545
9.79e-10	3711	23	GO:0006996	BP	organelle organization	4	Q969G3,Q15054,Q9ULW0,O00541,Q9HCK8,Q9NV56,P49711,P49005,Q9Y657,Q99567,Q15651,Q9NRZ9,P35658,O60832,P17096,Q00839,P02545,Q2NL82,P18754,Q13330,O75717,Q86U70,Q9BW19
0.061	589	6	GO:0048285	BP	organelle fission	5	Q9ULW0,Q99567,Q9NRZ9,P35658,P18754,Q9BW19
0.0416	550	6	GO:0000280	BP	nuclear division	6	Q9ULW0,Q99567,Q9NRZ9,P35658,P18754,Q9BW19
1	1091	4	GO:0007010	BP	cytoskeleton organization	5	Q9ULW0,P02545,P18754,Q9BW19
3.6e-11	1126	16	GO:0051276	BP	chromosome organization	5	Q969G3,Q15054,Q9HCK8,Q9NV56,P49711,P49005,Q9Y657,Q15651,Q9NRZ9,O60832,P17096,Q00839,Q13330,O75717,Q86U70,Q9BW19
0.0309	145	4	GO:0032200	BP	telomere organization	6	Q15054,P49005,O60832,Q00839
0.312	263	4	GO:0071103	BP	DNA conformation change	6	Q9HCK8,P49711,Q9NRZ9,P17096
1	63	2	GO:0032392	BP	DNA geometric change	7	Q9HCK8,P17096
1	58	2	GO:0032508	BP	DNA duplex unwinding	8	Q9HCK8,P17096
1	200	3	GO:0006323	BP	DNA packaging	7	P49711,Q9NRZ9,P17096
1	3	1	GO:0000972	BP	transcription-dependent tethering of RNA polymerase II gene DNA at nuclear periphery	6	Q86U70
6.29e-07	768	11	GO:0006325	BP	chromatin organization	6	Q969G3,Q9HCK8,Q9NV56,P49711,Q9Y657,Q15651,Q9NRZ9,P17096,Q13330,O75717,Q86U70
0.0837	187	4	GO:0006333	BP	chromatin assembly or disassembly	7	Q969G3,P49711,Q9NRZ9,P17096
0.000734	14	3	GO:0070828	BP	heterochromatin organization	7	Q9NRZ9,P17096,O75717
2.43e-05	614	9	GO:0016568	BP	chromatin modification	7	Q969G3,Q9HCK8,Q9NV56,P49711,Q9Y657,Q15651,Q9NRZ9,P17096,Q86U70
1	442	4	GO:0016569	BP	covalent chromatin modification	8	Q9NV56,P49711,Q9NRZ9,Q86U70
0.0372	152	4	GO:0006338	BP	chromatin remodeling	8	Q969G3,Q9HCK8,Q9NRZ9,P17096
1	44	1	GO:0031055	BP	chromatin remodeling at centromere	9	Q9NRZ9
1	75	2	GO:0043044	BP	ATP-dependent chromatin remodeling	9	Q969G3,Q9HCK8
1	171	3	GO:0034728	BP	nucleosome organization	7	Q969G3,P49711,P17096
0.0207	131	4	GO:0006997	BP	nucleus organization	5	O00541,Q99567,P35658,P02545
1	5	1	GO:0007000	BP	nucleolus organization	6	O00541
1	765	1	GO:0007005	BP	mitochondrion organization	5	P02545
3.59e-05	2476	15	GO:0022607	BP	cellular component assembly	4	P51948,P04181,Q9ULW0,P49711,P52298,Q9NRZ9,Q09161,P17096,Q2NL82,Q9BTL3,P18754,P34897,P13984,Q86U70,Q9BW19
1.67e-06	1649	14	GO:0065003	BP	macromolecular complex assembly	5	P51948,P04181,Q9ULW0,P49711,P52298,Q9NRZ9,Q09161,P17096,Q2NL82,Q9BTL3,P18754,P34897,P13984,Q9BW19
0.703	923	6	GO:0034622	BP	cellular macromolecular complex assembly	6	P52298,Q9NRZ9,Q09161,Q2NL82,Q9BTL3,P13984
1	193	2	GO:0065004	BP	protein-DNA complex assembly	7	Q9NRZ9,P13984
1	51	1	GO:0034508	BP	centromere complex assembly	8	Q9NRZ9
0.115	203	4	GO:0022618	BP	ribonucleoprotein complex assembly	7	P52298,Q09161,Q2NL82,Q9BTL3
0.167	1400	8	GO:0006461	BP	protein complex assembly	6	P51948,P04181,Q9ULW0,P17096,P18754,P34897,P13984,Q9BW19
1	463	2	GO:0051259	BP	protein oligomerization	7	P04181,P34897
1	7	1	GO:0034214	BP	protein hexamerization	8	P04181
1	265	1	GO:0051260	BP	protein homooligomerization	8	P34897
1	134	1	GO:0051262	BP	protein tetramerization	8	P34897
1	61	1	GO:0051289	BP	protein homotetramerization	9	P34897
1	162	3	GO:0031497	BP	chromatin assembly	6	P49711,Q9NRZ9,P17096
1	8	1	GO:0016584	BP	nucleosome positioning	7	P49711
0.0932	10	2	GO:0031507	BP	heterochromatin assembly	7	Q9NRZ9,P17096
1	3	1	GO:0035986	BP	senescence-associated heterochromatin focus assembly	8	P17096
1	2	1	GO:0031508	BP	pericentric heterochromatin assembly	8	Q9NRZ9
1	581	4	GO:0070925	BP	organelle assembly	5	Q9ULW0,Q2NL82,P18754,Q9BW19
1	52	1	GO:0042255	BP	ribosome assembly	6	Q2NL82
1	770	1	GO:0007610	BP	behavior	2	Q13330
1	206	1	GO:0007626	BP	locomotory behavior	3	Q13330
1	347	2	GO:0048511	BP	rhythmic process	2	Q00839,Q13330
1	212	2	GO:0007623	BP	circadian rhythm	3	Q00839,Q13330
1	48	1	GO:0007622	BP	rhythmic behavior	3	Q13330
1	47	1	GO:0048512	BP	circadian behavior	4	Q13330
3.67e-23	12055	51	GO:0008152	BP	metabolic process	2	P51948,P04181,Q969G3,Q15054,Q9BXP5,Q92945,Q9ULW0,Q9P2N5,Q6P6C2,O00541,Q9HCK8,Q9NV56,O43148,P49711,P56270,Q02218,P49005,Q9Y657,Q99567,O14776,P52298,Q15651,Q9NRZ9,P54278,P35269,P35658,Q8NBJ7,O60832,Q09161,P17096,Q9NWH9,O00622,Q8WVV9,P25705,O14979,Q00839,P02545,O15042,Q15072,Q9BTL3,P17028,P18754,P34897,P52292,Q13330,Q9BUI4,P13984,O75717,Q86U70,Q9BW19,Q92804
1.77e-23	10482	49	GO:0044238	BP	primary metabolic process	3	P51948,P04181,Q969G3,Q15054,Q9BXP5,Q92945,Q9ULW0,Q9P2N5,Q6P6C2,O00541,Q9HCK8,Q9NV56,O43148,P49711,P56270,Q02218,P49005,Q9Y657,Q99567,O14776,P52298,Q15651,Q9NRZ9,P54278,P35269,P35658,Q8NBJ7,O60832,Q09161,P17096,Q9NWH9,O00622,Q8WVV9,P25705,O14979,Q00839,P02545,O15042,Q15072,Q9BTL3,P17028,P34897,P52292,Q13330,Q9BUI4,P13984,O75717,Q86U70,Q92804
1	367	4	GO:0032259	BP	methylation	3	O43148,P49711,Q9NRZ9,Q9BTL3
5.01e-06	215	7	GO:0044033	BP	multi-organism metabolic process	3	P51948,Q99567,P52298,P35269,P35658,Q09161,P13984
4.37e-29	6922	47	GO:0006807	BP	nitrogen compound metabolic process	3	P51948,P04181,Q969G3,Q15054,Q9BXP5,Q92945,Q9P2N5,Q6P6C2,O00541,Q9HCK8,Q9NV56,O43148,P49711,P56270,Q02218,P49005,Q9Y657,Q99567,O14776,P52298,Q15651,Q9NRZ9,P54278,P35269,P35658,O60832,Q09161,P17096,Q9NWH9,O00622,Q8WVV9,P25705,O14979,Q00839,P02545,O15042,Q15072,Q9BTL3,P17028,P34897,P52292,Q13330,Q9BUI4,P13984,O75717,Q86U70,Q92804
6.39e-18	6390	37	GO:0009058	BP	biosynthetic process	3	P51948,P04181,Q969G3,Q15054,Q9BXP5,Q92945,Q9HCK8,Q9NV56,O43148,P49711,P56270,P49005,Q9Y657,Q99567,O14776,P52298,Q15651,Q9NRZ9,P35269,P35658,O60832,Q09161,P17096,Q9NWH9,O00622,P25705,O14979,Q00839,P02545,Q15072,P17028,P34897,Q13330,Q9BUI4,P13984,Q86U70,Q92804
7.39e-23	10808	49	GO:0071704	BP	organic substance metabolic process	3	P51948,P04181,Q969G3,Q15054,Q9BXP5,Q92945,Q9ULW0,Q9P2N5,Q6P6C2,O00541,Q9HCK8,Q9NV56,O43148,P49711,P56270,Q02218,P49005,Q9Y657,Q99567,O14776,P52298,Q15651,Q9NRZ9,P54278,P35269,P35658,Q8NBJ7,O60832,Q09161,P17096,Q9NWH9,O00622,Q8WVV9,P25705,O14979,Q00839,P02545,O15042,Q15072,Q9BTL3,P17028,P34897,P52292,Q13330,Q9BUI4,P13984,O75717,Q86U70,Q92804
4.26e-22	9286	46	GO:0043170	BP	macromolecule metabolic process	4	P51948,Q969G3,Q15054,Q9BXP5,Q92945,Q9ULW0,Q9P2N5,Q6P6C2,O00541,Q9HCK8,Q9NV56,O43148,P49711,P56270,P49005,Q9Y657,Q99567,O14776,P52298,Q15651,Q9NRZ9,P54278,P35269,P35658,Q8NBJ7,O60832,Q09161,P17096,Q9NWH9,O00622,Q8WVV9,O14979,Q00839,P02545,O15042,Q15072,Q9BTL3,P17028,P34897,P52292,Q13330,Q9BUI4,P13984,O75717,Q86U70,Q92804
8.11e-23	5430	39	GO:0010467	BP	gene expression	5	P51948,Q969G3,Q9BXP5,Q92945,Q9P2N5,Q6P6C2,O00541,Q9HCK8,Q9NV56,O43148,P49711,P56270,Q9Y657,Q99567,O14776,P52298,Q15651,Q9NRZ9,P35269,P35658,O60832,Q09161,P17096,Q9NWH9,O00622,Q8WVV9,O14979,Q00839,P02545,O15042,Q15072,Q9BTL3,P17028,Q13330,Q9BUI4,P13984,O75717,Q86U70,Q92804
3.6e-06	205	7	GO:0019080	BP	viral gene expression	6	P51948,Q99567,P52298,P35269,P35658,Q09161,P13984
0.0236	4139	15	GO:0043412	BP	macromolecule modification	5	P51948,Q9ULW0,Q6P6C2,Q9NV56,O43148,P49711,Q99567,Q9NRZ9,P35658,Q8NBJ7,O60832,O00622,P34897,Q13330,Q86U70
1	5770	15	GO:0019538	BP	protein metabolic process	5	P51948,Q9BXP5,Q9ULW0,Q9NV56,P49711,Q99567,P52298,P35658,Q8NBJ7,Q09161,O00622,P02545,P34897,Q13330,Q86U70
1	1632	3	GO:0006508	BP	proteolysis	6	O00622,P34897,Q13330
1	3959	11	GO:0036211	BP	protein modification process	6	P51948,Q9ULW0,Q9NV56,P49711,Q99567,P35658,Q8NBJ7,O00622,P34897,Q13330,Q86U70
1	1381	2	GO:1901135	BP	carbohydrate derivative metabolic process	4	Q02218,P25705
1	2290	8	GO:1901564	BP	organonitrogen compound metabolic process	4	P04181,Q9BXP5,Q02218,P52298,Q09161,O00622,P25705,P34897
4.04e-18	6305	37	GO:1901576	BP	organic substance biosynthetic process	4	P51948,P04181,Q969G3,Q15054,Q9BXP5,Q92945,Q9HCK8,Q9NV56,O43148,P49711,P56270,P49005,Q9Y657,Q99567,O14776,P52298,Q15651,Q9NRZ9,P35269,P35658,O60832,Q09161,P17096,Q9NWH9,O00622,P25705,O14979,Q00839,P02545,Q15072,P17028,P34897,Q13330,Q9BUI4,P13984,Q86U70,Q92804
1	1439	7	GO:1901566	BP	organonitrogen compound biosynthetic process	5	P04181,Q9BXP5,P52298,Q09161,O00622,P25705,P34897
1	894	1	GO:1901137	BP	carbohydrate derivative biosynthetic process	5	P25705
2.76e-17	5283	34	GO:0009059	BP	macromolecule biosynthetic process	5	P51948,Q969G3,Q15054,Q9BXP5,Q92945,Q9HCK8,Q9NV56,O43148,P49711,P56270,P49005,Q9Y657,Q99567,O14776,P52298,Q15651,Q9NRZ9,P35269,P35658,O60832,Q09161,P17096,Q9NWH9,O00622,O14979,Q00839,P02545,Q15072,P17028,Q13330,Q9BUI4,P13984,Q86U70,Q92804
1.91e-31	6143	47	GO:1901360	BP	organic cyclic compound metabolic process	4	P51948,P04181,Q969G3,Q15054,Q9BXP5,Q92945,Q9P2N5,Q6P6C2,O00541,Q9HCK8,Q9NV56,O43148,P49711,P56270,Q02218,P49005,Q9Y657,Q99567,O14776,P52298,Q15651,Q9NRZ9,P54278,P35269,P35658,O60832,Q09161,P17096,Q9NWH9,O00622,Q8WVV9,P25705,O14979,Q00839,P02545,O15042,Q15072,Q9BTL3,P17028,P34897,P52292,Q13330,Q9BUI4,P13984,O75717,Q86U70,Q92804
1.07e-20	4506	35	GO:1901362	BP	organic cyclic compound biosynthetic process	5	P51948,P04181,Q969G3,Q15054,Q9BXP5,Q92945,Q9HCK8,Q9NV56,O43148,P49711,P56270,P49005,Q9Y657,Q99567,O14776,P52298,Q15651,Q9NRZ9,P35269,P35658,O60832,Q09161,P17096,Q9NWH9,O00622,P25705,O14979,P02545,Q15072,P17028,Q13330,Q9BUI4,P13984,Q86U70,Q92804
1	1020	3	GO:0005975	BP	carbohydrate metabolic process	4	Q02218,Q99567,P35658
1	2256	6	GO:0009056	BP	catabolic process	3	P04181,Q92945,Q02218,P52298,Q09161,Q13330
1	1864	6	GO:1901575	BP	organic substance catabolic process	4	P04181,Q92945,Q02218,P52298,Q09161,Q13330
1	486	3	GO:1901361	BP	organic cyclic compound catabolic process	5	Q92945,P52298,Q09161
1	362	2	GO:1901565	BP	organonitrogen compound catabolic process	5	P04181,Q02218
1	1199	4	GO:0009057	BP	macromolecule catabolic process	5	Q92945,P52298,Q09161,Q13330
1	827	1	GO:0030163	BP	protein catabolic process	6	Q13330
1	146	1	GO:0016052	BP	carbohydrate catabolic process	5	Q02218
1.17e-23	10390	49	GO:0044237	BP	cellular metabolic process	3	P51948,P04181,Q969G3,Q15054,Q9BXP5,Q92945,Q9ULW0,Q9P2N5,Q6P6C2,O00541,Q9HCK8,Q9NV56,O43148,P49711,P56270,Q02218,P49005,Q9Y657,Q99567,O14776,P52298,Q15651,Q9NRZ9,P54278,P35269,P35658,Q8NBJ7,O60832,Q09161,P17096,Q9NWH9,O00622,Q8WVV9,P25705,O14979,Q00839,P02545,O15042,Q15072,Q9BTL3,P17028,P34897,P52292,Q13330,Q9BUI4,P13984,O75717,Q86U70,Q92804
1	3149	5	GO:0006793	BP	phosphorus metabolic process	4	P51948,Q9ULW0,Q02218,O00622,P25705
1	3088	5	GO:0006796	BP	phosphate-containing compound metabolic process	5	P51948,Q9ULW0,Q02218,O00622,P25705
1	2213	4	GO:0016310	BP	phosphorylation	6	P51948,Q9ULW0,Q02218,O00622
1	1081	2	GO:0019637	BP	organophosphate metabolic process	5	Q02218,P25705
1	595	1	GO:0090407	BP	organophosphate biosynthetic process	6	P25705
1	534	2	GO:0019693	BP	ribose phosphate metabolic process	6	Q02218,P25705
1	267	1	GO:0046390	BP	ribose phosphate biosynthetic process	7	P25705
1.47e-23	8596	46	GO:0044260	BP	cellular macromolecule metabolic process	4	P51948,Q969G3,Q15054,Q9BXP5,Q92945,Q9ULW0,Q9P2N5,Q6P6C2,O00541,Q9HCK8,Q9NV56,O43148,P49711,P56270,P49005,Q9Y657,Q99567,O14776,P52298,Q15651,Q9NRZ9,P54278,P35269,P35658,Q8NBJ7,O60832,Q09161,P17096,Q9NWH9,O00622,Q8WVV9,O14979,Q00839,P02545,O15042,Q15072,Q9BTL3,P17028,P34897,P52292,Q13330,Q9BUI4,P13984,O75717,Q86U70,Q92804
1	280	3	GO:0043414	BP	macromolecule methylation	5	O43148,P49711,Q9NRZ9
1	17	1	GO:0020027	BP	hemoglobin metabolic process	5	Q86U70
0.298	5157	15	GO:0044267	BP	cellular protein metabolic process	5	P51948,Q9BXP5,Q9ULW0,Q9NV56,P49711,Q99567,P52298,P35658,Q8NBJ7,Q09161,O00622,P02545,P34897,Q13330,Q86U70
1	3959	11	GO:0006464	BP	cellular protein modification process	6	P51948,Q9ULW0,Q9NV56,P49711,Q99567,P35658,Q8NBJ7,O00622,P34897,Q13330,Q86U70
1	1023	4	GO:0070647	BP	protein modification by small protein conjugation or removal	7	Q99567,P35658,P34897,Q13330
1	896	3	GO:0032446	BP	protein modification by small protein conjugation	8	Q99567,P35658,Q13330
1	784	1	GO:0016567	BP	protein ubiquitination	9	Q13330
1	51	1	GO:0051865	BP	protein autoubiquitination	10	Q13330
1	145	1	GO:0070646	BP	protein modification by small protein removal	8	P34897
1	128	1	GO:0016579	BP	protein deubiquitination	9	P34897
1	25	1	GO:0070536	BP	protein K63-linked deubiquitination	10	P34897
1	160	1	GO:0008213	BP	protein alkylation	7	P49711
1	160	1	GO:0006479	BP	protein methylation	8	P49711
1	217	3	GO:0043543	BP	protein acylation	7	Q9NV56,P49711,Q86U70
1	187	3	GO:0006473	BP	protein acetylation	8	Q9NV56,P49711,Q86U70
1	162	3	GO:0006475	BP	internal protein amino acid acetylation	9	Q9NV56,P49711,Q86U70
1	478	4	GO:0043687	BP	post-translational protein modification	7	Q99567,P35658,Q8NBJ7,Q13330
1	1367	6	GO:0018193	BP	peptidyl-amino acid modification	7	Q9NV56,P49711,Q99567,P35658,Q13330,Q86U70
0.00665	398	6	GO:0018205	BP	peptidyl-lysine modification	8	Q9NV56,P49711,Q99567,P35658,Q13330,Q86U70
1	161	3	GO:0018394	BP	peptidyl-lysine acetylation	9	Q9NV56,P49711,Q86U70
1	156	3	GO:0018393	BP	internal peptidyl-lysine acetylation	10	Q9NV56,P49711,Q86U70
0.62	127	3	GO:0016925	BP	protein sumoylation	9	Q99567,P35658,Q13330
1	1849	3	GO:0006468	BP	protein phosphorylation	7	P51948,Q9ULW0,O00622
1	1736	6	GO:0044248	BP	cellular catabolic process	4	P04181,Q92945,Q02218,P52298,Q09161,Q13330
1	956	4	GO:0044265	BP	cellular macromolecule catabolic process	5	Q92945,P52298,Q09161,Q13330
1	598	1	GO:0043632	BP	modification-dependent macromolecule catabolic process	6	Q13330
1	681	1	GO:0044257	BP	cellular protein catabolic process	6	Q13330
1	650	1	GO:0051603	BP	proteolysis involved in cellular protein catabolic process	7	Q13330
1	409	1	GO:0010498	BP	proteasomal protein catabolic process	8	Q13330
1	590	1	GO:0019941	BP	modification-dependent protein catabolic process	8	Q13330
1	582	1	GO:0006511	BP	ubiquitin-dependent protein catabolic process	9	Q13330
1	383	1	GO:0043161	BP	proteasome-mediated ubiquitin-dependent protein catabolic process	10	Q13330
3.14e-32	5905	47	GO:0046483	BP	heterocycle metabolic process	4	P51948,P04181,Q969G3,Q15054,Q9BXP5,Q92945,Q9P2N5,Q6P6C2,O00541,Q9HCK8,Q9NV56,O43148,P49711,P56270,Q02218,P49005,Q9Y657,Q99567,O14776,P52298,Q15651,Q9NRZ9,P54278,P35269,P35658,O60832,Q09161,P17096,Q9NWH9,O00622,Q8WVV9,P25705,O14979,Q00839,P02545,O15042,Q15072,Q9BTL3,P17028,P34897,P52292,Q13330,Q9BUI4,P13984,O75717,Q86U70,Q92804
1	444	3	GO:0046700	BP	heterocycle catabolic process	5	Q92945,P52298,Q09161
1	383	1	GO:0006790	BP	sulfur compound metabolic process	4	Q02218
1	91	1	GO:0035383	BP	thioester metabolic process	5	Q02218
1	491	2	GO:0006091	BP	generation of precursor metabolites and energy	4	Q02218,P25705
1	366	2	GO:0051186	BP	cofactor metabolic process	4	Q02218,P34897
1	306	2	GO:0006732	BP	coenzyme metabolic process	5	Q02218,P34897
1	142	1	GO:0006733	BP	oxidoreduction coenzyme metabolic process	6	Q02218
1	91	1	GO:0006637	BP	acyl-CoA metabolic process	6	Q02218
1	5	1	GO:0006104	BP	succinyl-CoA metabolic process	7	Q02218
1.04e-30	5921	46	GO:0006725	BP	cellular aromatic compound metabolic process	4	P51948,Q969G3,Q15054,Q9BXP5,Q92945,Q9P2N5,Q6P6C2,O00541,Q9HCK8,Q9NV56,O43148,P49711,P56270,Q02218,P49005,Q9Y657,Q99567,O14776,P52298,Q15651,Q9NRZ9,P54278,P35269,P35658,O60832,Q09161,P17096,Q9NWH9,O00622,Q8WVV9,P25705,O14979,Q00839,P02545,O15042,Q15072,Q9BTL3,P17028,P34897,P52292,Q13330,Q9BUI4,P13984,O75717,Q86U70,Q92804
1	455	3	GO:0019439	BP	aromatic compound catabolic process	5	Q92945,P52298,Q09161
1	34	1	GO:0042558	BP	pteridine-containing compound metabolic process	5	P34897
1	248	1	GO:0072593	BP	reactive oxygen species metabolic process	4	O00622
5.6e-30	6616	47	GO:0034641	BP	cellular nitrogen compound metabolic process	4	P51948,P04181,Q969G3,Q15054,Q9BXP5,Q92945,Q9P2N5,Q6P6C2,O00541,Q9HCK8,Q9NV56,O43148,P49711,P56270,Q02218,P49005,Q9Y657,Q99567,O14776,P52298,Q15651,Q9NRZ9,P54278,P35269,P35658,O60832,Q09161,P17096,Q9NWH9,O00622,Q8WVV9,P25705,O14979,Q00839,P02545,O15042,Q15072,Q9BTL3,P17028,P34897,P52292,Q13330,Q9BUI4,P13984,O75717,Q86U70,Q92804
1	444	3	GO:0044270	BP	cellular nitrogen compound catabolic process	5	Q92945,P52298,Q09161
1	136	1	GO:0072524	BP	pyridine-containing compound metabolic process	5	Q02218
1	575	2	GO:0072521	BP	purine-containing compound metabolic process	5	Q02218,P25705
1	1004	5	GO:0043603	BP	cellular amide metabolic process	5	Q9BXP5,P52298,Q09161,O00622,P34897
1	835	3	GO:0006518	BP	peptide metabolic process	6	Q9BXP5,P52298,Q09161
6.27e-30	5722	45	GO:0006139	BP	nucleobase-containing compound metabolic process	5	P51948,Q969G3,Q15054,Q9BXP5,Q92945,Q9P2N5,Q6P6C2,O00541,Q9HCK8,Q9NV56,O43148,P49711,P56270,Q02218,P49005,Q9Y657,Q99567,O14776,P52298,Q15651,Q9NRZ9,P54278,P35269,P35658,O60832,Q09161,P17096,Q9NWH9,O00622,Q8WVV9,P25705,O14979,Q00839,P02545,O15042,Q15072,Q9BTL3,P17028,P52292,Q13330,Q9BUI4,P13984,O75717,Q86U70,Q92804
3.95e-29	5125	43	GO:0090304	BP	nucleic acid metabolic process	6	P51948,Q969G3,Q15054,Q9BXP5,Q92945,Q9P2N5,Q6P6C2,O00541,Q9HCK8,Q9NV56,O43148,P49711,P56270,P49005,Q9Y657,Q99567,O14776,P52298,Q15651,Q9NRZ9,P54278,P35269,P35658,O60832,Q09161,P17096,Q9NWH9,O00622,Q8WVV9,O14979,Q00839,P02545,O15042,Q15072,Q9BTL3,P17028,P52292,Q13330,Q9BUI4,P13984,O75717,Q86U70,Q92804
0.0138	258	5	GO:0090305	BP	nucleic acid phosphodiester bond hydrolysis	7	Q15054,P49005,P52298,P54278,Q09161
1.77e-25	4606	39	GO:0016070	BP	RNA metabolic process	7	P51948,Q969G3,Q9BXP5,Q92945,Q9P2N5,Q6P6C2,O00541,Q9HCK8,Q9NV56,O43148,P49711,P56270,Q9Y657,Q99567,O14776,P52298,Q15651,Q9NRZ9,P35269,P35658,O60832,Q09161,P17096,Q9NWH9,O00622,Q8WVV9,O14979,Q00839,P02545,O15042,Q15072,Q9BTL3,P17028,Q13330,Q9BUI4,P13984,O75717,Q86U70,Q92804
2.9e-06	480	9	GO:0034660	BP	ncRNA metabolic process	8	Q9BXP5,Q92945,O00541,Q9Y657,Q99567,P52298,P35658,O60832,Q09161
1	203	2	GO:0006399	BP	tRNA metabolic process	9	Q99567,P35658
1	34	1	GO:0016073	BP	snRNA metabolic process	9	O60832
1	9	1	GO:0016074	BP	snoRNA metabolic process	9	O60832
1	1	1	GO:0033979	BP	box H/ACA snoRNA metabolic process	10	O60832
1	16	1	GO:0010586	BP	miRNA metabolic process	9	Q92945
1	161	2	GO:0016072	BP	rRNA metabolic process	9	O00541,O60832
1.32e-10	631	13	GO:0016071	BP	mRNA metabolic process	8	P51948,Q92945,Q9P2N5,Q6P6C2,O43148,P52298,P35269,O60832,Q09161,Q8WVV9,Q00839,Q9BTL3,P13984
0.567	24	2	GO:0008334	BP	histone mRNA metabolic process	9	P52298,Q09161
0.605	126	3	GO:0009451	BP	RNA modification	8	Q6P6C2,O43148,O60832
1	17	1	GO:0001522	BP	pseudouridine synthesis	9	O60832
1	14	1	GO:0016556	BP	mRNA modification	9	O60832
1	2	1	GO:1990481	BP	mRNA pseudouridine synthesis	10	O60832
1	2	1	GO:0040031	BP	snRNA modification	9	O60832
1	1	1	GO:0031120	BP	snRNA pseudouridine synthesis	10	O60832
1	54	1	GO:0001510	BP	RNA methylation	9	O43148
2.75e-19	821	20	GO:0006396	BP	RNA processing	8	P51948,Q9BXP5,Q92945,Q9P2N5,Q6P6C2,O00541,O43148,Q99567,P52298,P35269,P35658,O60832,Q09161,Q8WVV9,O14979,Q00839,O15042,Q9BTL3,P13984,O75717
1.55e-11	37	7	GO:0036260	BP	RNA capping	9	P51948,O43148,P52298,P35269,Q09161,Q9BTL3,P13984
1.55e-11	37	7	GO:0009452	BP	7-methylguanosine RNA capping	10	P51948,O43148,P52298,P35269,Q09161,Q9BTL3,P13984
1	4	1	GO:0036265	BP	RNA (guanine-N7)-methylation	11	O43148
0.0458	331	5	GO:0034470	BP	ncRNA processing	9	Q9BXP5,O00541,Q99567,P35658,O60832
1	8	1	GO:0043144	BP	snoRNA processing	10	O60832
1	1	1	GO:0034964	BP	box H/ACA snoRNA processing	11	O60832
1	148	2	GO:0008033	BP	tRNA processing	10	Q99567,P35658
1	155	2	GO:0006364	BP	rRNA processing	10	O00541,O60832
1	22	1	GO:0000460	BP	maturation of 5.8S rRNA	11	O00541
1	16	1	GO:0000466	BP	maturation of 5.8S rRNA from tricistronic rRNA transcript (SSU-rRNA, 5.8S rRNA, LSU-rRNA)	12	O00541
1	10	1	GO:0000470	BP	maturation of LSU-rRNA	11	O00541
1	9	1	GO:0000463	BP	maturation of LSU-rRNA from tricistronic rRNA transcript (SSU-rRNA, 5.8S rRNA, LSU-rRNA)	12	O00541
1	22	1	GO:0000154	BP	rRNA modification	11	O60832
1	2	1	GO:0031118	BP	rRNA pseudouridine synthesis	12	O60832
0.395	109	3	GO:0031123	BP	RNA 3'-end processing	9	P52298,O60832,Q09161
1	21	1	GO:0043628	BP	ncRNA 3'-end processing	10	O60832
1	8	1	GO:0031126	BP	snoRNA 3'-end processing	11	O60832
1	1	1	GO:0000495	BP	box H/ACA snoRNA 3'-end processing	12	O60832
0.000261	383	7	GO:0008380	BP	RNA splicing	9	Q92945,P52298,P35269,Q09161,Q8WVV9,Q00839,P13984
0.00105	289	6	GO:0000375	BP	RNA splicing, via transesterification reactions	10	Q92945,P52298,P35269,Q09161,Q00839,P13984
0.0224	285	5	GO:0000377	BP	RNA splicing, via transesterification reactions with bulged adenosine as nucleophile	11	P52298,P35269,Q09161,Q00839,P13984
7.18e-11	454	12	GO:0006397	BP	mRNA processing	9	P51948,Q92945,Q9P2N5,Q6P6C2,O43148,P52298,P35269,Q09161,Q8WVV9,Q00839,Q9BTL3,P13984
1	83	2	GO:0031124	BP	mRNA 3'-end processing	10	P52298,Q09161
6.46e-12	33	7	GO:0006370	BP	7-methylguanosine mRNA capping	10	P51948,O43148,P52298,P35269,Q09161,Q9BTL3,P13984
1	1	1	GO:0036031	BP	recruitment of mRNA capping enzyme to RNA polymerase II holoenzyme complex	11	Q9BTL3
0.0224	285	5	GO:0000398	BP	mRNA splicing, via spliceosome	10	P52298,P35269,Q09161,Q00839,P13984
0.248	16	2	GO:0045292	BP	mRNA cis splicing, via spliceosome	11	P52298,Q09161
1	41	2	GO:0000387	BP	spliceosomal snRNP assembly	11	P52298,Q09161
1	113	2	GO:0090501	BP	RNA phosphodiester bond hydrolysis	8	P52298,Q09161
0.391	20	2	GO:0006379	BP	mRNA cleavage	9	P52298,Q09161
0.0746	9	2	GO:0098787	BP	mRNA cleavage involved in mRNA processing	10	P52298,Q09161
0.0312	6	2	GO:0098789	BP	pre-mRNA cleavage required for polyadenylation	11	P52298,Q09161
7.77e-06	978	11	GO:0006259	BP	DNA metabolic process	7	P51948,Q15054,P49711,P49005,Q9NRZ9,P54278,O60832,P17096,Q00839,P52292,Q13330
1	44	2	GO:0022616	BP	DNA strand elongation	8	Q15054,P49005
0.503	298	4	GO:0006310	BP	DNA recombination	8	Q15054,P49005,P54278,P52292
1	54	1	GO:0016444	BP	somatic cell DNA recombination	9	P54278
1	41	2	GO:0006312	BP	mitotic recombination	9	Q15054,P49005
0.0312	6	2	GO:0010216	BP	maintenance of DNA methylation	8	P49711,Q9NRZ9
1	122	2	GO:0006304	BP	DNA modification	8	P49711,Q9NRZ9
1	89	2	GO:0006305	BP	DNA alkylation	9	P49711,Q9NRZ9
1	102	2	GO:0044728	BP	DNA methylation or demethylation	9	P49711,Q9NRZ9
1	398	3	GO:0034655	BP	nucleobase-containing compound catabolic process	6	Q92945,P52298,Q09161
1	241	3	GO:0006401	BP	RNA catabolic process	7	Q92945,P52298,Q09161
1	212	3	GO:0006402	BP	mRNA catabolic process	8	Q92945,P52298,Q09161
1	196	2	GO:0000956	BP	nuclear-transcribed mRNA catabolic process	9	P52298,Q09161
1	123	2	GO:0000184	BP	nuclear-transcribed mRNA catabolic process, nonsense-mediated decay	10	P52298,Q09161
2.39e-18	6210	37	GO:0044249	BP	cellular biosynthetic process	4	P51948,P04181,Q969G3,Q15054,Q9BXP5,Q92945,Q9HCK8,Q9NV56,O43148,P49711,P56270,P49005,Q9Y657,Q99567,O14776,P52298,Q15651,Q9NRZ9,P35269,P35658,O60832,Q09161,P17096,Q9NWH9,O00622,P25705,O14979,Q00839,P02545,Q15072,P17028,P34897,Q13330,Q9BUI4,P13984,Q86U70,Q92804
4.12e-21	4378	35	GO:0018130	BP	heterocycle biosynthetic process	5	P51948,P04181,Q969G3,Q15054,Q9BXP5,Q92945,Q9HCK8,Q9NV56,O43148,P49711,P56270,P49005,Q9Y657,Q99567,O14776,P52298,Q15651,Q9NRZ9,P35269,P35658,O60832,Q09161,P17096,Q9NWH9,O00622,P25705,O14979,P02545,Q15072,P17028,Q13330,Q9BUI4,P13984,Q86U70,Q92804
7.08e-20	4381	34	GO:0019438	BP	aromatic compound biosynthetic process	5	P51948,Q969G3,Q15054,Q9BXP5,Q92945,Q9HCK8,Q9NV56,O43148,P49711,P56270,P49005,Q9Y657,Q99567,O14776,P52298,Q15651,Q9NRZ9,P35269,P35658,O60832,Q09161,P17096,Q9NWH9,O00622,P25705,O14979,P02545,Q15072,P17028,Q13330,Q9BUI4,P13984,Q86U70,Q92804
3.16e-18	4934	34	GO:0044271	BP	cellular nitrogen compound biosynthetic process	5	P51948,Q969G3,Q15054,Q9BXP5,Q92945,Q9HCK8,Q9NV56,O43148,P49711,P56270,P49005,Q9Y657,Q99567,O14776,P52298,Q15651,Q9NRZ9,P35269,P35658,O60832,Q09161,P17096,Q9NWH9,O00622,P25705,O14979,P02545,Q15072,P17028,Q13330,Q9BUI4,P13984,Q86U70,Q92804
1	784	4	GO:0043604	BP	amide biosynthetic process	6	Q9BXP5,P52298,Q09161,O00622
1	706	3	GO:0043043	BP	peptide biosynthetic process	7	Q9BXP5,P52298,Q09161
4.19e-20	4310	34	GO:0034654	BP	nucleobase-containing compound biosynthetic process	6	P51948,Q969G3,Q15054,Q9BXP5,Q92945,Q9HCK8,Q9NV56,O43148,P49711,P56270,P49005,Q9Y657,Q99567,O14776,P52298,Q15651,Q9NRZ9,P35269,P35658,O60832,Q09161,P17096,Q9NWH9,O00622,P25705,O14979,P02545,Q15072,P17028,Q13330,Q9BUI4,P13984,Q86U70,Q92804
1.17e-16	3903	30	GO:0032774	BP	RNA biosynthetic process	7	P51948,Q969G3,Q9BXP5,Q92945,Q9HCK8,Q9NV56,O43148,P49711,P56270,Q9Y657,Q99567,O14776,P52298,Q15651,Q9NRZ9,P35269,P35658,Q09161,P17096,Q9NWH9,O00622,O14979,P02545,Q15072,P17028,Q13330,Q9BUI4,P13984,Q86U70,Q92804
9.1e-15	3781	28	GO:0097659	BP	nucleic acid-templated transcription	8	P51948,Q969G3,Q9BXP5,Q92945,Q9HCK8,Q9NV56,O43148,P49711,P56270,Q9Y657,O14776,P52298,Q15651,Q9NRZ9,P35269,Q09161,P17096,Q9NWH9,O00622,O14979,P02545,Q15072,P17028,Q13330,Q9BUI4,P13984,Q86U70,Q92804
2.45e-06	194	7	GO:0019083	BP	viral transcription	8	P51948,Q99567,P52298,P35269,P35658,Q09161,P13984
1	271	1	GO:0072522	BP	purine-containing compound biosynthetic process	6	P25705
1.72e-15	5123	32	GO:0034645	BP	cellular macromolecule biosynthetic process	5	P51948,Q969G3,Q15054,Q9BXP5,Q92945,Q9HCK8,Q9NV56,O43148,P49711,P56270,P49005,Q9Y657,O14776,P52298,Q15651,Q9NRZ9,P35269,O60832,Q09161,P17096,Q9NWH9,O00622,O14979,Q00839,P02545,Q15072,P17028,Q13330,Q9BUI4,P13984,Q86U70,Q92804
1	11	1	GO:0042541	BP	hemoglobin biosynthetic process	6	Q86U70
0.0507	338	5	GO:0006260	BP	DNA replication	6	Q15054,P49005,O60832,P17096,Q00839
0.62	127	3	GO:0006261	BP	DNA-dependent DNA replication	7	Q15054,P49005,P17096
1	8	1	GO:0006268	BP	DNA unwinding involved in DNA replication	8	P17096
1	57	2	GO:0006278	BP	RNA-dependent DNA replication	7	O60832,Q00839
1	38	2	GO:0006271	BP	DNA strand elongation involved in DNA replication	7	Q15054,P49005
1	677	3	GO:0006412	BP	translation	6	Q9BXP5,P52298,Q09161
1	153	3	GO:0071897	BP	DNA biosynthetic process	6	Q15054,P49005,O60832
8.21e-15	3766	28	GO:0006351	BP	transcription, DNA-templated	6	P51948,Q969G3,Q9BXP5,Q92945,Q9HCK8,Q9NV56,O43148,P49711,P56270,Q9Y657,O14776,P52298,Q15651,Q9NRZ9,P35269,Q09161,P17096,Q9NWH9,O00622,O14979,P02545,Q15072,P17028,Q13330,Q9BUI4,P13984,Q86U70,Q92804
1	40	1	GO:0098781	BP	ncRNA transcription	7	Q9Y657
1	30	1	GO:0009303	BP	rRNA transcription	8	Q9Y657
1.83e-07	134	7	GO:0006354	BP	DNA-templated transcription, elongation	7	P51948,P52298,P35269,Q09161,Q9BUI4,P13984,Q86U70
0.666	321	4	GO:0006352	BP	DNA-templated transcription, initiation	7	P51948,P56270,P35269,P13984
1	25	1	GO:0070897	BP	DNA-templated transcriptional preinitiation complex assembly	8	P13984
1	59	1	GO:0006360	BP	transcription from RNA polymerase I promoter	7	P51948
1	31	1	GO:0006362	BP	transcription elongation from RNA polymerase I promoter	8	P51948
1	34	1	GO:0006361	BP	transcription initiation from RNA polymerase I promoter	8	P51948
2.34e-08	2036	17	GO:0006366	BP	transcription from RNA polymerase II promoter	7	P51948,Q969G3,Q9HCK8,Q9NV56,O43148,P49711,P56270,O14776,P52298,Q15651,P35269,Q09161,P17096,O00622,P02545,P13984,Q86U70
0.391	279	4	GO:0006367	BP	transcription initiation from RNA polymerase II promoter	8	P51948,P56270,P35269,P13984
1	23	1	GO:0051123	BP	RNA polymerase II transcriptional preinitiation complex assembly	9	P13984
9.92e-05	95	5	GO:0006368	BP	transcription elongation from RNA polymerase II promoter	8	P51948,P52298,P35269,Q09161,P13984
0.000105	96	5	GO:0006353	BP	DNA-templated transcription, termination	7	P51948,P56270,P52298,Q09161,Q9BUI4
0.0319	47	3	GO:0006369	BP	termination of RNA polymerase II transcription	8	P56270,P52298,Q09161
1	31	1	GO:0006363	BP	termination of RNA polymerase I transcription	8	P51948
1	56	2	GO:0006383	BP	transcription from RNA polymerase III promoter	7	Q9HCK8,Q9BUI4
1	18	1	GO:0006386	BP	termination of RNA polymerase III transcription	8	Q9BUI4
1	18	1	GO:0006385	BP	transcription elongation from RNA polymerase III promoter	8	Q9BUI4
1	320	1	GO:0006575	BP	cellular modified amino acid metabolic process	4	P34897
1	273	2	GO:0006413	BP	translational initiation	4	P52298,Q09161
1.54e-08	13769	39	GO:0044699	BP	single-organism process	2	P51948,P04181,Q969G3,Q15054,Q9BXP5,Q9ULW0,Q6P6C2,O00541,Q9HCK8,Q9NV56,P49711,Q02218,P49005,Q9Y657,Q99567,P52298,Q15651,Q9NRZ9,P54278,P35658,O60832,Q09161,P17096,Q9NWH9,Q9NZM1,O00622,P25705,Q00839,P02545,Q9BZZ5,P17028,P18754,P34897,P52292,Q13330,Q9BUI4,O75717,Q86U70,Q9BW19
1	2026	8	GO:0016265	BP	death	3	P51948,Q9ULW0,Q9HCK8,Q9NRZ9,Q9NWH9,O00622,P02545,Q9BZZ5
1	6337	12	GO:0044700	BP	single organism signaling	3	Q9HCK8,Q9Y657,Q99567,Q15651,Q9NRZ9,P35658,Q9NZM1,O00622,P02545,P52292,Q13330,Q86U70
0.346	5849	16	GO:0044767	BP	single-organism developmental process	3	P51948,Q969G3,Q9BXP5,Q6P6C2,Q9HCK8,Q02218,Q9Y657,Q9NRZ9,P54278,P17096,O00622,P25705,Q00839,P02545,P17028,Q86U70
1	301	2	GO:0007568	BP	aging	4	P17096,P02545
1	594	1	GO:0061061	BP	muscle structure development	4	P02545
1	762	4	GO:0060322	BP	head development	4	P51948,Q9HCK8,Q02218,Q86U70
1	632	1	GO:0048729	BP	tissue morphogenesis	4	O00622
1	490	1	GO:0002009	BP	morphogenesis of an epithelium	5	O00622
1	48	1	GO:0002011	BP	morphogenesis of an epithelial sheet	6	O00622
1	25	1	GO:0090504	BP	epiboly	7	O00622
1	24	1	GO:0090505	BP	epiboly involved in wound healing	8	O00622
4.96e-09	12573	38	GO:0044763	BP	single-organism cellular process	3	P51948,P04181,Q969G3,Q15054,Q9BXP5,Q9ULW0,Q6P6C2,O00541,Q9HCK8,Q9NV56,P49711,Q02218,P49005,Q9Y657,Q99567,P52298,Q15651,Q9NRZ9,P54278,P35658,O60832,Q09161,P17096,Q9NWH9,Q9NZM1,O00622,P25705,Q00839,P02545,Q9BZZ5,P17028,P18754,P34897,P52292,Q13330,O75717,Q86U70,Q9BW19
1	915	4	GO:0044802	BP	single-organism membrane organization	4	Q99567,P35658,Q9NZM1,P02545
1	274	1	GO:0007009	BP	plasma membrane organization	5	Q9NZM1
1	7	1	GO:0001778	BP	plasma membrane repair	6	Q9NZM1
0.136	76	3	GO:0006998	BP	nuclear envelope organization	5	Q99567,P35658,P02545
1	13	1	GO:0031468	BP	nuclear envelope reassembly	6	P02545
1	773	5	GO:0022411	BP	cellular component disassembly	4	Q969G3,Q99567,P35658,P17096,P02545
0.0299	46	3	GO:0030397	BP	membrane disassembly	5	Q99567,P35658,P02545
0.0299	46	3	GO:0051081	BP	nuclear envelope disassembly	6	Q99567,P35658,P02545
1	320	2	GO:0032984	BP	macromolecular complex disassembly	5	Q969G3,P17096
0.281	17	2	GO:0032986	BP	protein-DNA complex disassembly	6	Q969G3,P17096
1	309	2	GO:0043241	BP	protein complex disassembly	6	Q969G3,P17096
1.4e-06	2656	17	GO:1902589	BP	single-organism organelle organization	4	Q969G3,Q15054,Q9ULW0,Q9NV56,P49711,P49005,Q99567,Q9NRZ9,P35658,O60832,P17096,Q00839,P02545,P18754,O75717,Q86U70,Q9BW19
0.352	19	2	GO:0031498	BP	chromatin disassembly	5	Q969G3,P17096
0.281	17	2	GO:0006337	BP	nucleosome disassembly	5	Q969G3,P17096
1	279	3	GO:0007059	BP	chromosome segregation	4	P49711,P18754,Q9BW19
1	6420	12	GO:0007154	BP	cell communication	4	Q9HCK8,Q9Y657,Q99567,Q15651,Q9NRZ9,P35658,Q9NZM1,O00622,P02545,P52292,Q13330,Q86U70
1	1229	2	GO:0007267	BP	cell-cell signaling	5	Q15651,O00622
1	1979	4	GO:0006928	BP	movement of cell or subcellular component	4	Q02218,O00622,P02545,Q9BW19
1	1320	3	GO:0048870	BP	cell motility	5	Q02218,O00622,P02545
1	1211	3	GO:0016477	BP	cell migration	6	Q02218,O00622,P02545
1	24	1	GO:0044319	BP	wound healing, spreading of cells	7	O00622
4.83e-05	1796	13	GO:0007049	BP	cell cycle	4	P51948,Q15054,Q9ULW0,O00541,P49711,P49005,Q9Y657,Q99567,Q9NRZ9,P35658,P02545,P18754,Q9BW19
0.00018	1038	10	GO:0000278	BP	mitotic cell cycle	5	P51948,Q15054,Q9ULW0,P49005,Q99567,Q9NRZ9,P35658,P02545,P18754,Q9BW19
1	617	4	GO:0007017	BP	microtubule-based process	4	Q9ULW0,P02545,P18754,Q9BW19
1	217	1	GO:0007018	BP	microtubule-based movement	5	Q9BW19
1	434	4	GO:0000226	BP	microtubule cytoskeleton organization	5	Q9ULW0,P02545,P18754,Q9BW19
1	989	1	GO:0001775	BP	cell activation	4	Q9NRZ9
1	750	1	GO:0045321	BP	leukocyte activation	5	Q9NRZ9
1	644	1	GO:0046649	BP	lymphocyte activation	6	Q9NRZ9
1	164	1	GO:0007163	BP	establishment or maintenance of cell polarity	4	P02545
1	6	1	GO:0030952	BP	establishment or maintenance of cytoskeleton polarity	5	P02545
1	3	1	GO:0030951	BP	establishment or maintenance of microtubule cytoskeleton polarity	6	P02545
1	672	4	GO:0051301	BP	cell division	4	Q9ULW0,Q9NRZ9,P18754,Q9BW19
1	497	2	GO:0016049	BP	cell growth	4	Q09161,O00622
0.000163	1319	11	GO:0022402	BP	cell cycle process	4	P51948,Q15054,Q9ULW0,P49711,P49005,Q99567,Q9NRZ9,P35658,P02545,P18754,Q9BW19
1	216	2	GO:0098813	BP	nuclear chromosome segregation	5	P49711,Q9BW19
1	153	2	GO:0000819	BP	sister chromatid segregation	6	P49711,Q9BW19
1	43	1	GO:0051310	BP	metaphase plate congression	6	Q9BW19
1	507	2	GO:0044770	BP	cell cycle phase transition	5	P51948,P18754
1	259	2	GO:0044843	BP	cell cycle G1/S phase transition	6	P51948,P18754
1	197	1	GO:0044839	BP	cell cycle G2/M phase transition	6	P51948
0.00531	865	8	GO:1903047	BP	mitotic cell cycle process	5	P51948,Q9ULW0,Q99567,Q9NRZ9,P35658,P02545,P18754,Q9BW19
1	483	2	GO:0044772	BP	mitotic cell cycle phase transition	6	P51948,P18754
1	250	2	GO:0000082	BP	G1/S transition of mitotic cell cycle	7	P51948,P18754
1	193	1	GO:0000086	BP	G2/M transition of mitotic cell cycle	7	P51948
0.00994	427	6	GO:0007067	BP	mitotic nuclear division	6	Q9ULW0,Q99567,Q9NRZ9,P35658,P18754,Q9BW19
1	52	2	GO:1902850	BP	microtubule cytoskeleton organization involved in mitosis	7	Q9ULW0,Q9BW19
1	10	1	GO:0007084	BP	mitotic nuclear envelope reassembly	6	P02545
0.0261	44	3	GO:0007077	BP	mitotic nuclear envelope disassembly	6	Q99567,P35658,P02545
1	129	1	GO:0000070	BP	mitotic sister chromatid segregation	6	Q9BW19
1	43	1	GO:0007062	BP	sister chromatid cohesion	5	P49711
1	7	1	GO:0070601	BP	centromeric sister chromatid cohesion	6	P49711
0.709	133	3	GO:0007051	BP	spindle organization	5	Q9ULW0,P18754,Q9BW19
0.164	81	3	GO:0007052	BP	mitotic spindle organization	6	Q9ULW0,P18754,Q9BW19
0.164	81	3	GO:0051225	BP	spindle assembly	6	Q9ULW0,P18754,Q9BW19
1	47	2	GO:0090307	BP	mitotic spindle assembly	7	Q9ULW0,Q9BW19
1	2026	8	GO:0008219	BP	cell death	4	P51948,Q9ULW0,Q9HCK8,Q9NRZ9,Q9NWH9,O00622,P02545,Q9BZZ5
1	1921	8	GO:0012501	BP	programmed cell death	5	P51948,Q9ULW0,Q9HCK8,Q9NRZ9,Q9NWH9,O00622,P02545,Q9BZZ5
1	1901	8	GO:0006915	BP	apoptotic process	6	P51948,Q9ULW0,Q9HCK8,Q9NRZ9,Q9NWH9,O00622,P02545,Q9BZZ5
1	461	2	GO:0097285	BP	cell-type specific apoptotic process	7	Q9HCK8,Q9BZZ5
0.352	19	2	GO:0044346	BP	fibroblast apoptotic process	8	Q9HCK8,Q9BZZ5
1	32	1	GO:1902742	BP	apoptotic process involved in development	7	O00622
1	119	1	GO:0008637	BP	apoptotic mitochondrial changes	7	P02545
1	395	1	GO:0043062	BP	extracellular structure organization	4	O00622
1	394	1	GO:0030198	BP	extracellular matrix organization	5	O00622
1	4112	8	GO:0048869	BP	cellular developmental process	4	Q969G3,Q9BXP5,Q6P6C2,Q02218,O00622,Q00839,P02545,Q86U70
1	3859	8	GO:0030154	BP	cell differentiation	5	Q969G3,Q9BXP5,Q6P6C2,Q02218,O00622,Q00839,P02545,Q86U70
1	367	1	GO:0042692	BP	muscle cell differentiation	6	P02545
1	257	1	GO:0051146	BP	striated muscle cell differentiation	7	P02545
1	2225	4	GO:0048468	BP	cell development	5	Q9BXP5,Q02218,O00622,P02545
1	158	1	GO:0055001	BP	muscle cell development	6	P02545
1	145	1	GO:0055002	BP	striated muscle cell development	7	P02545
1	42	1	GO:0010623	BP	developmental programmed cell death	5	O00622
1	26	1	GO:0060561	BP	apoptotic process involved in morphogenesis	6	O00622
1	26	1	GO:0043954	BP	cellular component maintenance	4	O75717
1	3	1	GO:0070827	BP	chromatin maintenance	5	O75717
1	2	1	GO:0070829	BP	heterochromatin maintenance	6	O75717
1	93	2	GO:0007569	BP	cell aging	4	P17096,P02545
1	53	1	GO:0090398	BP	cellular senescence	5	P17096
1	2	1	GO:0090402	BP	oncogene-induced cell senescence	6	P17096
1	96	1	GO:0097194	BP	execution phase of apoptosis	4	P02545
1	69	1	GO:0006921	BP	cellular component disassembly involved in execution phase of apoptosis	5	P02545
0.000159	5684	21	GO:0044710	BP	single-organism metabolic process	3	P51948,P04181,Q15054,Q9BXP5,Q6P6C2,Q9NV56,P49711,Q02218,P49005,Q99567,P54278,P35658,O60832,P17096,O00622,P25705,Q00839,P34897,P52292,Q13330,Q86U70
1	409	2	GO:1901657	BP	glycosyl compound metabolic process	4	Q02218,P25705
1	829	1	GO:0044723	BP	single-organism carbohydrate metabolic process	4	Q02218
1	1178	2	GO:0044712	BP	single-organism catabolic process	4	P04181,Q02218
1	138	1	GO:0044724	BP	single-organism carbohydrate catabolic process	5	Q02218
0.836	1776	8	GO:0044711	BP	single-organism biosynthetic process	4	P04181,Q15054,P49005,O60832,O00622,P25705,Q00839,P34897
1	130	1	GO:1901659	BP	glycosyl compound biosynthetic process	5	P25705
1	50	2	GO:0044786	BP	cell cycle DNA replication	5	Q15054,P49005
1	41	2	GO:0033260	BP	nuclear DNA replication	6	Q15054,P49005
1	25	1	GO:0031050	BP	dsRNA fragmentation	4	Q9BXP5
1	69	1	GO:0070988	BP	demethylation	4	Q6P6C2
1	2701	6	GO:0044281	BP	small molecule metabolic process	4	P04181,Q02218,Q99567,P35658,P25705,P34897
1	356	2	GO:0044282	BP	small molecule catabolic process	5	P04181,Q02218
1	553	2	GO:0044283	BP	small molecule biosynthetic process	5	P04181,P34897
1	175	1	GO:0006766	BP	vitamin metabolic process	5	P34897
1	97	1	GO:0006767	BP	water-soluble vitamin metabolic process	6	P34897
1	35	1	GO:0006730	BP	one-carbon metabolic process	5	P34897
1	1246	3	GO:0006082	BP	organic acid metabolic process	5	P04181,Q02218,P34897
1	1230	3	GO:0043436	BP	oxoacid metabolic process	6	P04181,Q02218,P34897
1	1106	3	GO:0019752	BP	carboxylic acid metabolic process	7	P04181,Q02218,P34897
0.344	104	3	GO:0043648	BP	dicarboxylic acid metabolic process	8	P04181,Q02218,P34897
1	20	1	GO:0006103	BP	2-oxoglutarate metabolic process	9	Q02218
1	38	1	GO:0072350	BP	tricarboxylic acid metabolic process	8	Q02218
1	34	1	GO:0006101	BP	citrate metabolic process	9	Q02218
1	612	1	GO:0032787	BP	monocarboxylic acid metabolic process	8	Q02218
1	105	1	GO:0006090	BP	pyruvate metabolic process	9	Q02218
1	518	3	GO:0006520	BP	cellular amino acid metabolic process	8	P04181,Q02218,P34897
1	351	3	GO:1901605	BP	alpha-amino acid metabolic process	9	P04181,Q02218,P34897
1	72	1	GO:0009064	BP	glutamine family amino acid metabolic process	10	P04181
1	20	1	GO:0006525	BP	arginine metabolic process	11	P04181
1	32	1	GO:0006536	BP	glutamate metabolic process	11	P04181
1	11	1	GO:0006560	BP	proline metabolic process	11	P04181
1	49	1	GO:0009066	BP	aspartate family amino acid metabolic process	10	Q02218
1	13	1	GO:0006553	BP	lysine metabolic process	11	Q02218
1	127	1	GO:0009069	BP	serine family amino acid metabolic process	10	P34897
1	9	1	GO:0006563	BP	L-serine metabolic process	11	P34897
1	16	1	GO:0006544	BP	glycine metabolic process	11	P34897
1	27	1	GO:0006760	BP	folic acid-containing compound metabolic process	10	P34897
1	19	1	GO:0046653	BP	tetrahydrofolate metabolic process	11	P34897
1	10	1	GO:0035999	BP	tetrahydrofolate interconversion	12	P34897
1	13	1	GO:0046655	BP	folic acid metabolic process	11	P34897
1	311	2	GO:0016053	BP	organic acid biosynthetic process	6	P04181,P34897
1	311	2	GO:0046394	BP	carboxylic acid biosynthetic process	7	P04181,P34897
1	91	2	GO:0008652	BP	cellular amino acid biosynthetic process	8	P04181,P34897
1	76	2	GO:1901607	BP	alpha-amino acid biosynthetic process	9	P04181,P34897
1	22	1	GO:0009084	BP	glutamine family amino acid biosynthetic process	10	P04181
1	8	1	GO:0006561	BP	proline biosynthetic process	11	P04181
1	5	1	GO:0055129	BP	L-proline biosynthetic process	12	P04181
1	16	1	GO:0009070	BP	serine family amino acid biosynthetic process	10	P34897
1	6	1	GO:0006545	BP	glycine biosynthetic process	11	P34897
1	2	1	GO:0019264	BP	glycine biosynthetic process from serine	12	P34897
1	4	1	GO:0006564	BP	L-serine biosynthetic process	11	P34897
1	231	2	GO:0016054	BP	organic acid catabolic process	6	P04181,Q02218
1	231	2	GO:0046395	BP	carboxylic acid catabolic process	7	P04181,Q02218
1	123	2	GO:0009063	BP	cellular amino acid catabolic process	8	P04181,Q02218
1	99	2	GO:1901606	BP	alpha-amino acid catabolic process	9	P04181,Q02218
1	25	1	GO:0009065	BP	glutamine family amino acid catabolic process	10	P04181
1	10	1	GO:0006527	BP	arginine catabolic process	11	P04181
1	1	1	GO:0019493	BP	arginine catabolic process to proline	12	P04181
1	1	1	GO:0010121	BP	arginine catabolic process to proline via ornithine	13	P04181
1	1	1	GO:0019544	BP	arginine catabolic process to glutamate	12	P04181
1	18	1	GO:0009068	BP	aspartate family amino acid catabolic process	10	Q02218
1	12	1	GO:0006554	BP	lysine catabolic process	11	Q02218
1	715	2	GO:0055086	BP	nucleobase-containing small molecule metabolic process	5	Q02218,P25705
1	655	2	GO:0006753	BP	nucleoside phosphate metabolic process	6	Q02218,P25705
1	286	2	GO:0009123	BP	nucleoside monophosphate metabolic process	7	Q02218,P25705
1	274	2	GO:0009161	BP	ribonucleoside monophosphate metabolic process	8	Q02218,P25705
1	263	2	GO:0009126	BP	purine nucleoside monophosphate metabolic process	8	Q02218,P25705
1	262	2	GO:0009167	BP	purine ribonucleoside monophosphate metabolic process	9	Q02218,P25705
1	268	2	GO:0009141	BP	nucleoside triphosphate metabolic process	7	Q02218,P25705
1	248	2	GO:0009144	BP	purine nucleoside triphosphate metabolic process	8	Q02218,P25705
1	247	2	GO:0009199	BP	ribonucleoside triphosphate metabolic process	8	Q02218,P25705
1	241	2	GO:0009205	BP	purine ribonucleoside triphosphate metabolic process	9	Q02218,P25705
1	318	1	GO:1901293	BP	nucleoside phosphate biosynthetic process	7	P25705
1	74	1	GO:0009142	BP	nucleoside triphosphate biosynthetic process	8	P25705
1	57	1	GO:0009145	BP	purine nucleoside triphosphate biosynthetic process	9	P25705
1	62	1	GO:0009201	BP	ribonucleoside triphosphate biosynthetic process	9	P25705
1	56	1	GO:0009206	BP	purine ribonucleoside triphosphate biosynthetic process	10	P25705
1	91	1	GO:0009124	BP	nucleoside monophosphate biosynthetic process	8	P25705
1	71	1	GO:0009127	BP	purine nucleoside monophosphate biosynthetic process	9	P25705
1	83	1	GO:0009156	BP	ribonucleoside monophosphate biosynthetic process	9	P25705
1	71	1	GO:0009168	BP	purine ribonucleoside monophosphate biosynthetic process	10	P25705
1	117	1	GO:0009132	BP	nucleoside diphosphate metabolic process	7	Q02218
1	94	1	GO:0009135	BP	purine nucleoside diphosphate metabolic process	8	Q02218
1	96	1	GO:0009185	BP	ribonucleoside diphosphate metabolic process	8	Q02218
1	94	1	GO:0009179	BP	purine ribonucleoside diphosphate metabolic process	9	Q02218
1	648	2	GO:0009117	BP	nucleotide metabolic process	7	Q02218,P25705
1	129	1	GO:0019362	BP	pyridine nucleotide metabolic process	8	Q02218
1	129	1	GO:0046496	BP	nicotinamide nucleotide metabolic process	9	Q02218
1	62	1	GO:0019674	BP	NAD metabolic process	10	Q02218
1	40	1	GO:0006734	BP	NADH metabolic process	11	Q02218
1	95	1	GO:0046939	BP	nucleotide phosphorylation	8	Q02218
1	89	1	GO:0006165	BP	nucleoside diphosphate phosphorylation	9	Q02218
1	520	2	GO:0009259	BP	ribonucleotide metabolic process	8	Q02218,P25705
1	526	2	GO:0006163	BP	purine nucleotide metabolic process	8	Q02218,P25705
1	505	2	GO:0009150	BP	purine ribonucleotide metabolic process	9	Q02218,P25705
1	313	1	GO:0009165	BP	nucleotide biosynthetic process	8	P25705
1	264	1	GO:0009260	BP	ribonucleotide biosynthetic process	9	P25705
1	257	1	GO:0006164	BP	purine nucleotide biosynthetic process	9	P25705
1	251	1	GO:0009152	BP	purine ribonucleotide biosynthetic process	10	P25705
1	390	2	GO:0009116	BP	nucleoside metabolic process	6	Q02218,P25705
1	366	2	GO:0009119	BP	ribonucleoside metabolic process	7	Q02218,P25705
1	128	1	GO:0009163	BP	nucleoside biosynthetic process	7	P25705
1	118	1	GO:0042455	BP	ribonucleoside biosynthetic process	8	P25705
1	340	2	GO:0042278	BP	purine nucleoside metabolic process	7	Q02218,P25705
1	337	2	GO:0046128	BP	purine ribonucleoside metabolic process	8	Q02218,P25705
1	225	2	GO:0046034	BP	ATP metabolic process	9	Q02218,P25705
1	79	1	GO:0046031	BP	ADP metabolic process	9	Q02218
1	71	1	GO:0006757	BP	ATP generation from ADP	10	Q02218
1	70	1	GO:0006096	BP	glycolytic process	11	Q02218
1	99	1	GO:0042451	BP	purine nucleoside biosynthetic process	8	P25705
1	99	1	GO:0046129	BP	purine ribonucleoside biosynthetic process	9	P25705
1	45	1	GO:0006754	BP	ATP biosynthetic process	10	P25705
1	1111	3	GO:0055114	BP	oxidation-reduction process	4	Q6P6C2,Q02218,P25705
1	15	1	GO:0070989	BP	oxidative demethylation	5	Q6P6C2
1	2	1	GO:0035513	BP	oxidative RNA demethylation	6	Q6P6C2
1	2	1	GO:0035553	BP	oxidative single-stranded RNA demethylation	7	Q6P6C2
1	147	1	GO:0022900	BP	electron transport chain	5	P25705
1	402	2	GO:0015980	BP	energy derivation by oxidation of organic compounds	5	Q02218,P25705
1	213	2	GO:0045333	BP	cellular respiration	6	Q02218,P25705
1	64	1	GO:0009060	BP	aerobic respiration	7	Q02218
1	30	1	GO:0006099	BP	tricarboxylic acid cycle	8	Q02218
1	145	1	GO:0022904	BP	respiratory electron transport chain	7	P25705
1	1363	2	GO:0006629	BP	lipid metabolic process	4	O00622,P25705
1	1066	1	GO:0044255	BP	cellular lipid metabolic process	5	O00622
1	195	1	GO:0006643	BP	membrane lipid metabolic process	6	O00622
1	147	1	GO:0006665	BP	sphingolipid metabolic process	7	O00622
1	83	1	GO:0006672	BP	ceramide metabolic process	8	O00622
1	659	1	GO:0008610	BP	lipid biosynthetic process	5	O00622
1	126	1	GO:0046467	BP	membrane lipid biosynthetic process	6	O00622
1	88	1	GO:0030148	BP	sphingolipid biosynthetic process	7	O00622
1	52	1	GO:0046513	BP	ceramide biosynthetic process	8	O00622
1	85	1	GO:0006081	BP	cellular aldehyde metabolic process	4	Q02218
1	26	1	GO:0046487	BP	glyoxylate metabolic process	5	Q02218
0.002	519	7	GO:0006281	BP	DNA repair	4	P51948,Q15054,P49005,P54278,P17096,P52292,Q13330
0.475	116	3	GO:0006289	BP	nucleotide-excision repair	5	P51948,Q15054,P49005
0.12	73	3	GO:0006283	BP	transcription-coupled nucleotide-excision repair	6	P51948,Q15054,P49005
0.0736	62	3	GO:0070911	BP	global genome nucleotide-excision repair	6	P51948,Q15054,P49005
0.52	23	2	GO:0006297	BP	nucleotide-excision repair, DNA gap filling	6	Q15054,P49005
1	39	2	GO:0033683	BP	nucleotide-excision repair, DNA incision	6	Q15054,P49005
1	227	2	GO:0006302	BP	double-strand break repair	5	P52292,Q13330
0.0433	52	3	GO:0006284	BP	base-excision repair	5	Q15054,P49005,P17096
1	61	2	GO:0006301	BP	postreplication repair	5	Q15054,P49005
1	49	2	GO:0019985	BP	translesion synthesis	6	Q15054,P49005
0.0167	38	3	GO:0006298	BP	mismatch repair	5	Q15054,P49005,P54278
1	14	1	GO:0000731	BP	DNA synthesis involved in DNA repair	5	Q15054
1	429	3	GO:0016570	BP	histone modification	4	Q9NV56,P49711,Q86U70
1	127	1	GO:0016571	BP	histone methylation	5	P49711
1	151	3	GO:0016573	BP	histone acetylation	5	Q9NV56,P49711,Q86U70
1	61	1	GO:0043966	BP	histone H3 acetylation	6	Q86U70
1	1	1	GO:0043973	BP	histone H3-K4 acetylation	7	Q86U70
1	4182	10	GO:1902578	BP	single-organism localization	3	Q6P6C2,Q99567,P52298,Q15651,P35658,Q09161,P25705,P02545,P52292,Q9BW19
1	4002	9	GO:0044765	BP	single-organism transport	4	Q6P6C2,Q99567,P52298,Q15651,P35658,Q09161,P25705,P02545,P52292
1	159	1	GO:0006818	BP	hydrogen transport	5	P25705
1	3	1	GO:0051030	BP	snRNA transport	5	P52298
0.735	1742	8	GO:1902582	BP	single-organism intracellular transport	5	Q6P6C2,Q99567,P52298,P35658,Q09161,P25705,P02545,P52292
0.381	277	4	GO:1902593	BP	single-organism nuclear import	6	Q99567,P35658,P02545,P52292
9.4e-05	94	5	GO:0071426	BP	ribonucleoprotein complex export from nucleus	6	Q6P6C2,Q99567,P52298,P35658,Q09161
4.72e-05	82	5	GO:0071427	BP	mRNA-containing ribonucleoprotein complex export from nucleus	7	Q6P6C2,Q99567,P52298,P35658,Q09161
4.72e-05	82	5	GO:0006406	BP	mRNA export from nucleus	8	Q6P6C2,Q99567,P52298,P35658,Q09161
1	11	1	GO:0071428	BP	rRNA-containing ribonucleoprotein complex export from nucleus	7	Q99567
1	283	1	GO:0006839	BP	mitochondrial transport	6	P25705
1	706	4	GO:0006605	BP	protein targeting	6	Q99567,P35658,P02545,P52292
1	56	2	GO:0006611	BP	protein export from nucleus	6	Q99567,P35658
1	2	1	GO:0006408	BP	snRNA export from nucleus	6	P52298
1	1096	1	GO:0046903	BP	secretion	5	Q15651
1	963	1	GO:0032940	BP	secretion by cell	6	Q15651
1	450	1	GO:0023061	BP	signal release	7	Q15651
1	495	1	GO:0009306	BP	protein secretion	7	Q15651
1	1549	1	GO:0006811	BP	ion transport	5	P25705
1	1052	1	GO:0006812	BP	cation transport	6	P25705
1	584	1	GO:0015672	BP	monovalent inorganic cation transport	7	P25705
1	157	1	GO:0015992	BP	proton transport	8	P25705
1	191	2	GO:0008643	BP	carbohydrate transport	5	Q99567,P35658
1	153	2	GO:0015749	BP	monosaccharide transport	6	Q99567,P35658
1	151	2	GO:0008645	BP	hexose transport	7	Q99567,P35658
1	149	2	GO:0015758	BP	glucose transport	8	Q99567,P35658
1	368	1	GO:0042886	BP	amide transport	5	Q15651
1	344	1	GO:0015833	BP	peptide transport	6	Q15651
1	281	1	GO:0002790	BP	peptide secretion	7	Q15651
1	1419	3	GO:0055085	BP	transmembrane transport	5	Q99567,P35658,P25705
1	36	1	GO:0090662	BP	ATP hydrolysis coupled transmembrane transport	6	P25705
1	60	1	GO:1990542	BP	mitochondrial transmembrane transport	6	P25705
1	1017	1	GO:0034220	BP	ion transmembrane transport	6	P25705
1	739	1	GO:0098660	BP	inorganic ion transmembrane transport	7	P25705
1	723	1	GO:0098655	BP	cation transmembrane transport	7	P25705
1	657	1	GO:0098662	BP	inorganic cation transmembrane transport	8	P25705
1	115	1	GO:1902600	BP	hydrogen ion transmembrane transport	9	P25705
1	32	1	GO:0015988	BP	energy coupled proton transmembrane transport, against electrochemical gradient	10	P25705
1	32	1	GO:0015991	BP	ATP hydrolysis coupled proton transport	11	P25705
1	27	1	GO:0015985	BP	energy coupled proton transport, down electrochemical gradient	10	P25705
1	27	1	GO:0015986	BP	ATP synthesis coupled proton transport	11	P25705
1	19	1	GO:0042776	BP	mitochondrial ATP synthesis coupled proton transport	12	P25705
0.706	326	4	GO:0017038	BP	protein import	5	Q99567,P35658,P02545,P52292
1	1284	5	GO:1902580	BP	single-organism cellular localization	4	Q99567,P35658,P02545,P52292,Q9BW19
0.381	277	4	GO:0044744	BP	protein targeting to nucleus	5	Q99567,P35658,P02545,P52292
1	8	1	GO:0000054	BP	ribosomal subunit export from nucleus	5	Q99567
1	4	1	GO:0000056	BP	ribosomal small subunit export from nucleus	6	Q99567
1	6	1	GO:0000055	BP	ribosomal large subunit export from nucleus	6	Q99567
1	33	1	GO:0007080	BP	mitotic metaphase plate congression	5	Q9BW19
0.381	277	4	GO:0006606	BP	protein import into nucleus	5	Q99567,P35658,P02545,P52292
1	23	1	GO:0006607	BP	NLS-bearing protein import into nucleus	6	P52292
0.0589	1990	10	GO:0008283	BP	cell proliferation	3	P51948,Q9BXP5,Q9ULW0,O00541,Q9NRZ9,O60832,P17096,O00622,P25705,P34897
1	153	1	GO:0033002	BP	muscle cell proliferation	4	P51948
1	105	1	GO:0048659	BP	smooth muscle cell proliferation	5	P51948
1	354	1	GO:0050673	BP	epithelial cell proliferation	4	P25705
1	113	1	GO:0001935	BP	endothelial cell proliferation	5	P25705
1	26	1	GO:0033687	BP	osteoblast proliferation	4	O00622
1	279	1	GO:0070661	BP	leukocyte proliferation	4	Q9NRZ9
1	267	1	GO:0032943	BP	mononuclear cell proliferation	5	Q9NRZ9
1	264	1	GO:0046651	BP	lymphocyte proliferation	6	Q9NRZ9
0.188	6175	17	GO:0044707	BP	single-multicellular organism process	3	P51948,Q969G3,Q9BXP5,Q9HCK8,Q02218,Q9Y657,Q9NRZ9,P54278,O00622,P25705,Q00839,P02545,P17028,Q13330,Q9BUI4,Q86U70,Q9BW19
1	109	1	GO:0042303	BP	molting cycle	4	Q86U70
1	109	1	GO:0042633	BP	hair cycle	5	Q86U70
1	88	1	GO:0022404	BP	molting cycle process	4	Q86U70
1	88	1	GO:0022405	BP	hair cycle process	5	Q86U70
1	647	1	GO:0001816	BP	cytokine production	4	Q9BUI4
1	127	1	GO:0032606	BP	type I interferon production	5	Q9BUI4
1	48	1	GO:0032608	BP	interferon-beta production	6	Q9BUI4
1	376	3	GO:0001503	BP	ossification	4	O00622,Q00839,P02545
1	209	3	GO:0001649	BP	osteoblast differentiation	5	O00622,Q00839,P02545
1	579	1	GO:0050817	BP	coagulation	4	Q9BW19
1	5038	13	GO:0007275	BP	multicellular organismal development	4	P51948,Q969G3,Q9BXP5,Q9HCK8,Q02218,Q9Y657,Q9NRZ9,P54278,O00622,P25705,P02545,P17028,Q86U70
1	4482	11	GO:0048731	BP	system development	5	P51948,Q969G3,Q9BXP5,Q9HCK8,Q02218,Q9NRZ9,P54278,O00622,P02545,P17028,Q86U70
1	334	1	GO:0001655	BP	urogenital system development	6	Q9NRZ9
1	2418	7	GO:0007399	BP	nervous system development	6	P51948,Q969G3,Q9BXP5,Q9HCK8,Q02218,P17028,Q86U70
1	113	1	GO:0007272	BP	ensheathment of neurons	7	P17028
1	113	1	GO:0008366	BP	axon ensheathment	8	P17028
1	110	1	GO:0042552	BP	myelination	9	P17028
1	1727	4	GO:0022008	BP	neurogenesis	7	Q969G3,Q9BXP5,Q02218,Q86U70
1	1646	3	GO:0048699	BP	generation of neurons	8	Q9BXP5,Q02218,Q86U70
1	1532	2	GO:0030182	BP	neuron differentiation	9	Q02218,Q86U70
1	1269	1	GO:0048666	BP	neuron development	10	Q02218
1	507	1	GO:0001501	BP	skeletal system development	6	O00622
1	461	1	GO:0061458	BP	reproductive system development	6	O00622
1	160	1	GO:0055123	BP	digestive system development	6	Q9HCK8
1	987	3	GO:0072359	BP	circulatory system development	6	P51948,O00622,P02545
1	3212	6	GO:0048513	BP	animal organ development	6	P51948,Q9HCK8,Q02218,O00622,P02545,Q86U70
1	255	1	GO:0043588	BP	skin development	7	Q86U70
1	90	1	GO:0098773	BP	skin epidermis development	8	Q86U70
1	88	1	GO:0001942	BP	hair follicle development	9	Q86U70
1	965	1	GO:0009887	BP	organ morphogenesis	7	O00622
1	366	1	GO:0007517	BP	muscle organ development	7	P02545
1	36	1	GO:0060612	BP	adipose tissue development	7	P02545
1	189	1	GO:0051216	BP	cartilage development	7	O00622
1	5	1	GO:0060591	BP	chondroblast differentiation	8	O00622
1	987	3	GO:0072358	BP	cardiovascular system development	6	P51948,O00622,P02545
1	538	3	GO:0007507	BP	heart development	7	P51948,O00622,P02545
1	37	1	GO:0003170	BP	heart valve development	8	O00622
1	21	1	GO:0003171	BP	atrioventricular valve development	9	O00622
1	31	1	GO:0003179	BP	heart valve morphogenesis	9	O00622
1	18	1	GO:0003181	BP	atrioventricular valve morphogenesis	10	O00622
1	16	1	GO:0007512	BP	adult heart development	8	P51948
1	151	1	GO:0003205	BP	cardiac chamber development	8	O00622
1	32	1	GO:0003230	BP	cardiac atrium development	9	O00622
1	93	1	GO:0003279	BP	cardiac septum development	9	O00622
1	19	1	GO:0003283	BP	atrial septum development	10	O00622
1	111	1	GO:0003231	BP	cardiac ventricle development	9	O00622
1	59	1	GO:0003281	BP	ventricular septum development	10	O00622
1	229	1	GO:0003007	BP	heart morphogenesis	8	O00622
1	105	1	GO:0003206	BP	cardiac chamber morphogenesis	9	O00622
1	51	1	GO:0060411	BP	cardiac septum morphogenesis	10	O00622
1	27	1	GO:0003209	BP	cardiac atrium morphogenesis	10	O00622
1	14	1	GO:0060413	BP	atrial septum morphogenesis	11	O00622
1	5	1	GO:0003278	BP	apoptotic process involved in heart morphogenesis	9	O00622
1	182	1	GO:0048738	BP	cardiac muscle tissue development	8	P02545
1	121	1	GO:0035051	BP	cardiocyte differentiation	8	P02545
1	64	1	GO:0055006	BP	cardiac cell development	9	P02545
1	99	1	GO:0055007	BP	cardiac muscle cell differentiation	9	P02545
1	20	1	GO:0055012	BP	ventricular cardiac muscle cell differentiation	10	P02545
1	62	1	GO:0055013	BP	cardiac muscle cell development	10	P02545
1	13	1	GO:0055015	BP	ventricular cardiac muscle cell development	11	P02545
1	951	4	GO:0007417	BP	central nervous system development	6	P51948,Q9HCK8,Q02218,Q86U70
1	719	4	GO:0007420	BP	brain development	7	P51948,Q9HCK8,Q02218,Q86U70
1	159	2	GO:0030902	BP	hindbrain development	8	Q02218,Q86U70
1	115	2	GO:0022037	BP	metencephalon development	9	Q02218,Q86U70
1	103	2	GO:0021549	BP	cerebellum development	10	Q02218,Q86U70
1	54	2	GO:0021695	BP	cerebellar cortex development	11	Q02218,Q86U70
1	30	1	GO:0021680	BP	cerebellar Purkinje cell layer development	12	Q86U70
1	47	1	GO:0021575	BP	hindbrain morphogenesis	9	Q86U70
1	43	1	GO:0021587	BP	cerebellum morphogenesis	10	Q86U70
1	36	1	GO:0021696	BP	cerebellar cortex morphogenesis	11	Q86U70
1	17	1	GO:0021692	BP	cerebellar Purkinje cell layer morphogenesis	12	Q86U70
1	26	1	GO:0021697	BP	cerebellar cortex formation	12	Q86U70
1	14	1	GO:0021694	BP	cerebellar Purkinje cell layer formation	13	Q86U70
1	25	1	GO:0021533	BP	cell differentiation in hindbrain	9	Q86U70
1	392	1	GO:0030900	BP	forebrain development	8	Q02218
1	83	1	GO:0021536	BP	diencephalon development	9	Q02218
1	15	1	GO:0021794	BP	thalamus development	10	Q02218
1	250	1	GO:0021537	BP	telencephalon development	9	Q02218
1	23	1	GO:0021544	BP	subpallium development	10	Q02218
1	17	1	GO:0021756	BP	striatum development	11	Q02218
1	39	1	GO:0021988	BP	olfactory lobe development	10	Q02218
1	37	1	GO:0021772	BP	olfactory bulb development	11	Q02218
1	2	1	GO:0061034	BP	olfactory bulb mitral cell layer development	12	Q02218
1	169	1	GO:0021543	BP	pallium development	10	Q02218
1	74	1	GO:0021872	BP	forebrain generation of neurons	9	Q02218
1	67	1	GO:0021885	BP	forebrain cell migration	9	Q02218
1	64	1	GO:0022029	BP	telencephalon cell migration	10	Q02218
1	9	1	GO:0022028	BP	tangential migration from the subventricular zone to the olfactory bulb	11	Q02218
1	182	2	GO:0021953	BP	central nervous system neuron differentiation	7	Q02218,Q86U70
1	12	1	GO:0021859	BP	pyramidal neuron differentiation	8	Q02218
1	76	1	GO:0021954	BP	central nervous system neuron development	8	Q02218
1	67	1	GO:0021879	BP	forebrain neuron differentiation	8	Q02218
1	37	1	GO:0021884	BP	forebrain neuron development	9	Q02218
1	11	1	GO:0021860	BP	pyramidal neuron development	10	Q02218
1	13	1	GO:0021702	BP	cerebellar Purkinje cell differentiation	8	Q86U70
1	843	2	GO:0002520	BP	immune system development	6	P54278,Q86U70
1	65	1	GO:0002200	BP	somatic diversification of immune receptors	7	P54278
1	54	1	GO:0002562	BP	somatic diversification of immune receptors via germline recombination within a single locus	8	P54278
1	18	1	GO:0002566	BP	somatic diversification of immune receptors via somatic mutation	8	P54278
1	54	1	GO:0016445	BP	somatic diversification of immunoglobulins	8	P54278
1	17	1	GO:0016446	BP	somatic hypermutation of immunoglobulin genes	9	P54278
1	44	1	GO:0016447	BP	somatic recombination of immunoglobulin gene segments	9	P54278
1	795	1	GO:0048534	BP	hematopoietic or lymphoid organ development	7	Q86U70
1	749	1	GO:0030097	BP	hemopoiesis	8	Q86U70
1	346	1	GO:0030099	BP	myeloid cell differentiation	9	Q86U70
1	630	1	GO:0001944	BP	vasculature development	6	O00622
1	607	1	GO:0001568	BP	blood vessel development	7	O00622
1	511	1	GO:0048514	BP	blood vessel morphogenesis	8	O00622
1	430	1	GO:0001525	BP	angiogenesis	9	O00622
1	2	1	GO:0002041	BP	intussusceptive angiogenesis	10	O00622
1	29	1	GO:0021591	BP	ventricular system development	6	P51948
1	107	1	GO:0021761	BP	limbic system development	6	Q02218
1	77	1	GO:0021766	BP	hippocampus development	7	Q02218
1	635	1	GO:0035295	BP	tube development	5	Q9HCK8
1	146	1	GO:0048565	BP	digestive tract development	6	Q9HCK8
1	1030	4	GO:0009790	BP	embryo development	5	Q9HCK8,O00622,P25705,Q86U70
1	644	2	GO:0009792	BP	embryo development ending in birth or egg hatching	6	Q9HCK8,O00622
1	636	2	GO:0043009	BP	chordate embryonic development	7	Q9HCK8,O00622
1	377	2	GO:0001701	BP	in utero embryonic development	8	Q9HCK8,O00622
1	608	2	GO:0048598	BP	embryonic morphogenesis	6	O00622,Q86U70
1	182	1	GO:0007369	BP	gastrulation	7	Q86U70
1	30	1	GO:0001702	BP	gastrulation with mouth forming second	8	Q86U70
1	449	1	GO:0048568	BP	embryonic organ development	6	O00622
1	467	1	GO:0007389	BP	pattern specification process	4	Q86U70
1	350	1	GO:0003002	BP	regionalization	5	Q86U70
1	212	1	GO:0009952	BP	anterior/posterior pattern specification	6	Q86U70
1	96	1	GO:0009798	BP	axis specification	5	Q86U70
1	51	1	GO:0009948	BP	anterior/posterior axis specification	6	Q86U70
1	167	2	GO:0019827	BP	stem cell population maintenance	4	Q9BXP5,Q86U70
1	78	1	GO:0035019	BP	somatic stem cell population maintenance	5	Q86U70
1	21	1	GO:0097150	BP	neuronal stem cell population maintenance	5	Q9BXP5
1	782	1	GO:0098602	BP	single organism cell adhesion	3	O00622
1	731	1	GO:0016337	BP	single organismal cell-cell adhesion	4	O00622
1	446	1	GO:0044708	BP	single-organism behavior	3	Q13330
1	14	1	GO:0045475	BP	locomotor rhythm	4	Q13330
5.08e-17	11489	45	GO:0065007	BP	biological regulation	2	P51948,Q969G3,Q15054,Q9BXP5,Q92945,Q9ULW0,Q6P6C2,O00541,Q9HCK8,Q9NV56,P49711,P56270,P49005,Q9Y657,Q99567,O14776,P52298,Q15651,Q9NRZ9,P35269,P35658,O60832,Q09161,P17096,Q9NWH9,Q9NZM1,O00622,Q8WVV9,P25705,O14979,Q00839,P02545,Q9BZZ5,Q15072,P17028,P18754,P34897,P52292,Q13330,Q9BUI4,P13984,O75717,Q86U70,Q9BW19,Q92804
1	3631	11	GO:0065008	BP	regulation of biological quality	3	Q15054,Q92945,P49005,Q99567,Q15651,P35658,O60832,Q00839,P52292,Q86U70,Q9BW19
0.773	137	3	GO:0035821	BP	modification of morphology or physiology of other organism	4	Q99567,P35658,P52292
0.499	118	3	GO:0051817	BP	modification of morphology or physiology of other organism involved in symbiotic interaction	5	Q99567,P35658,P52292
0.13	75	3	GO:0044003	BP	modification by symbiont of host morphology or physiology	6	Q99567,P35658,P52292
0.0888	66	3	GO:0019048	BP	modulation by virus of host morphology or physiology	7	Q99567,P35658,P52292
1	732	1	GO:0050878	BP	regulation of body fluid levels	4	Q9BW19
1	578	1	GO:0007599	BP	hemostasis	5	Q9BW19
1	573	1	GO:0007596	BP	blood coagulation	6	Q9BW19
1	1605	6	GO:0042592	BP	homeostatic process	4	Q15054,P49005,Q15651,O60832,Q00839,Q86U70
0.0809	373	5	GO:0060249	BP	anatomical structure homeostasis	5	Q15054,P49005,O60832,Q00839,Q86U70
0.0214	132	4	GO:0000723	BP	telomere maintenance	6	Q15054,P49005,O60832,Q00839
0.00354	84	4	GO:0010833	BP	telomere maintenance via telomere lengthening	7	Q15054,P49005,O60832,Q00839
1	54	2	GO:0007004	BP	telomere maintenance via telomerase	8	O60832,Q00839
0.89	30	2	GO:0000722	BP	telomere maintenance via recombination	7	Q15054,P49005
1	1022	1	GO:0048878	BP	chemical homeostasis	5	Q15651
1	230	1	GO:0033500	BP	carbohydrate homeostasis	6	Q15651
1	230	1	GO:0042593	BP	glucose homeostasis	7	Q15651
1	238	1	GO:0048872	BP	homeostasis of number of cells	5	Q86U70
1	129	1	GO:0002262	BP	myeloid cell homeostasis	6	Q86U70
1	106	1	GO:0034101	BP	erythrocyte homeostasis	7	Q86U70
1	97	1	GO:0030218	BP	erythrocyte differentiation	8	Q86U70
1	801	3	GO:0019725	BP	cellular homeostasis	5	Q15054,P49005,Q15651
1	668	1	GO:0055082	BP	cellular chemical homeostasis	6	Q15651
1	135	1	GO:0001678	BP	cellular glucose homeostasis	7	Q15651
1	120	1	GO:0071333	BP	cellular response to glucose stimulus	8	Q15651
0.719	27	2	GO:0032201	BP	telomere maintenance via semi-conservative replication	6	Q15054,P49005
1	347	1	GO:0048871	BP	multicellular organismal homeostasis	5	Q86U70
1	221	1	GO:0001894	BP	tissue homeostasis	6	Q86U70
1	24	1	GO:0010669	BP	epithelial structure maintenance	7	Q86U70
1	507	1	GO:0010817	BP	regulation of hormone levels	4	Q15651
1	339	1	GO:0009914	BP	hormone transport	5	Q15651
1	329	1	GO:0046879	BP	hormone secretion	6	Q15651
1	273	1	GO:0030072	BP	peptide hormone secretion	7	Q15651
1	229	1	GO:0030073	BP	insulin secretion	8	Q15651
1	60	1	GO:0035773	BP	insulin secretion involved in cellular response to glucose stimulus	9	Q15651
1	2862	9	GO:0065009	BP	regulation of molecular function	3	P51948,Q9ULW0,P49711,Q15651,P35269,O60832,O00622,Q00839,P18754
1	1830	7	GO:0044093	BP	positive regulation of molecular function	4	Q9ULW0,Q15651,P35269,O60832,O00622,Q00839,P18754
1	1	1	GO:0040030	BP	regulation of molecular function, epigenetic	4	P49711
1	1400	5	GO:0022414	BP	reproductive process	2	Q6P6C2,Q9Y657,O00622,P02545,Q9BW19
1	973	4	GO:0044703	BP	multi-organism reproductive process	3	Q6P6C2,Q9Y657,P02545,Q9BW19
1	787	4	GO:0019953	BP	sexual reproduction	4	Q6P6C2,Q9Y657,P02545,Q9BW19
1	1257	5	GO:0044702	BP	single organism reproductive process	3	Q6P6C2,Q9Y657,O00622,P02545,Q9BW19
1	210	1	GO:0051321	BP	meiotic cell cycle	4	Q9Y657
1	662	1	GO:0003006	BP	developmental process involved in reproduction	3	O00622
1	456	1	GO:0048608	BP	reproductive structure development	4	O00622
1	155	1	GO:0001890	BP	placenta development	5	O00622
1	31	1	GO:0060674	BP	placenta blood vessel development	4	O00622
1	94	1	GO:0001892	BP	embryonic placenta development	4	O00622
1	50	1	GO:0060711	BP	labyrinthine layer development	5	O00622
1	20	1	GO:0060716	BP	labyrinthine layer blood vessel development	6	O00622
1	27	1	GO:0060669	BP	embryonic placenta morphogenesis	4	O00622
1	24	1	GO:0060713	BP	labyrinthine layer morphogenesis	4	O00622
1	7	1	GO:0060710	BP	chorio-allantoic fusion	5	O00622
1	799	4	GO:0048609	BP	multicellular organismal reproductive process	3	Q6P6C2,Q9Y657,P02545,Q9BW19
1	630	4	GO:0007276	BP	gamete generation	4	Q6P6C2,Q9Y657,P02545,Q9BW19
1	502	3	GO:0048232	BP	male gamete generation	5	Q6P6C2,P02545,Q9BW19
1	501	3	GO:0007283	BP	spermatogenesis	6	Q6P6C2,P02545,Q9BW19
1.09e-14	10984	42	GO:0050789	BP	regulation of biological process	2	P51948,Q969G3,Q9BXP5,Q92945,Q9ULW0,Q6P6C2,O00541,Q9HCK8,Q9NV56,P49711,P56270,Q9Y657,Q99567,O14776,P52298,Q15651,Q9NRZ9,P35269,P35658,O60832,Q09161,P17096,Q9NWH9,Q9NZM1,O00622,Q8WVV9,P25705,O14979,Q00839,P02545,Q9BZZ5,Q15072,P17028,P18754,P34897,P52292,Q13330,Q9BUI4,P13984,O75717,Q86U70,Q92804
1	2414	7	GO:0032879	BP	regulation of localization	3	Q99567,P52298,Q15651,P35658,O60832,O00622,P02545
1	15	1	GO:1904872	BP	regulation of telomerase RNA localization to Cajal body	4	O60832
1	1776	4	GO:0051049	BP	regulation of transport	4	Q99567,P52298,Q15651,P35658
1	281	1	GO:0090087	BP	regulation of peptide transport	5	Q15651
1	11	1	GO:0032239	BP	regulation of nucleobase-containing compound transport	5	P52298
1	701	1	GO:0051046	BP	regulation of secretion	5	Q15651
1	234	1	GO:0002791	BP	regulation of peptide secretion	6	Q15651
1	105	2	GO:0010827	BP	regulation of glucose transport	5	Q99567,P35658
1	974	3	GO:0032880	BP	regulation of protein localization	4	Q15651,O60832,P02545
1	833	2	GO:0070201	BP	regulation of establishment of protein localization	5	Q15651,O60832
1	760	1	GO:0051223	BP	regulation of protein transport	6	Q15651
1	2603	5	GO:0051239	BP	regulation of multicellular organismal process	3	Q9BXP5,O00622,P02545,Q9BUI4,Q86U70
1	185	2	GO:0030278	BP	regulation of ossification	4	O00622,P02545
1	584	1	GO:0001817	BP	regulation of cytokine production	4	Q9BUI4
1	125	1	GO:0032479	BP	regulation of type I interferon production	5	Q9BUI4
1	46	1	GO:0032648	BP	regulation of interferon-beta production	6	Q9BUI4
1	732	2	GO:0044087	BP	regulation of cellular component biogenesis	3	O00622,P13984
3.42e-06	5569	23	GO:0048518	BP	positive regulation of biological process	3	P51948,Q9BXP5,Q9ULW0,Q9HCK8,P49711,Q9Y657,P52298,Q15651,P35269,O60832,Q09161,P17096,O00622,Q8WVV9,Q00839,P02545,P18754,P34897,Q13330,Q9BUI4,P13984,Q86U70,Q92804
1	15	1	GO:1904874	BP	positive regulation of telomerase RNA localization to Cajal body	4	O60832
1	1453	4	GO:0051240	BP	positive regulation of multicellular organismal process	4	Q9BXP5,O00622,P02545,Q9BUI4
1	89	2	GO:0045778	BP	positive regulation of ossification	5	O00622,P02545
1	400	1	GO:0001819	BP	positive regulation of cytokine production	5	Q9BUI4
1	89	1	GO:0032481	BP	positive regulation of type I interferon production	6	Q9BUI4
1	31	1	GO:0032728	BP	positive regulation of interferon-beta production	7	Q9BUI4
1	412	1	GO:0044089	BP	positive regulation of cellular component biogenesis	4	P13984
1	927	1	GO:0051050	BP	positive regulation of transport	4	P52298
1	3	1	GO:0032241	BP	positive regulation of nucleobase-containing compound transport	5	P52298
0.0217	490	6	GO:0043900	BP	regulation of multi-organism process	3	P51948,Q6P6C2,P52298,P35269,Q09161,P13984
0.00696	224	5	GO:0043903	BP	regulation of symbiosis, encompassing mutualism through parasitism	4	P51948,P52298,P35269,Q09161,P13984
0.0018	170	5	GO:0043902	BP	positive regulation of multi-organism process	4	P51948,P52298,P35269,Q09161,P13984
0.156	3740	13	GO:0048583	BP	regulation of response to stimulus	3	Q6P6C2,Q9HCK8,Q9Y657,Q99567,Q15651,Q9NRZ9,P35658,P17096,Q9NZM1,O00622,P02545,Q13330,Q9BUI4
1	1463	6	GO:0080134	BP	regulation of response to stress	4	Q6P6C2,Q99567,P35658,P17096,Q13330,Q9BUI4
1	799	3	GO:0031347	BP	regulation of defense response	5	Q6P6C2,Q13330,Q9BUI4
1	409	1	GO:1903034	BP	regulation of response to wounding	5	Q13330
1	895	2	GO:0032101	BP	regulation of response to external stimulus	4	Q6P6C2,Q13330
1	291	1	GO:0050727	BP	regulation of inflammatory response	5	Q13330
1	239	1	GO:0002831	BP	regulation of response to biotic stimulus	4	Q6P6C2
1	2072	4	GO:0048584	BP	positive regulation of response to stimulus	4	Q9Y657,P17096,O00622,Q9BUI4
1	440	1	GO:0031349	BP	positive regulation of defense response	5	Q9BUI4
1	440	4	GO:0032844	BP	regulation of homeostatic process	3	Q15651,O60832,Q00839,Q86U70
1	207	1	GO:0032846	BP	positive regulation of homeostatic process	4	O60832
1	766	2	GO:0040012	BP	regulation of locomotion	3	O00622,P02545
1	420	1	GO:0040017	BP	positive regulation of locomotion	4	O00622
7.45e-14	6805	34	GO:0019222	BP	regulation of metabolic process	3	P51948,Q969G3,Q9BXP5,Q92945,Q9ULW0,Q9HCK8,Q9NV56,P49711,P56270,Q99567,O14776,P52298,Q15651,Q9NRZ9,P35269,P35658,O60832,Q09161,P17096,Q9NWH9,O00622,Q8WVV9,O14979,Q00839,P02545,Q15072,P17028,P18754,P52292,Q13330,Q9BUI4,P13984,Q86U70,Q92804
2.41e-13	4292	28	GO:0009889	BP	regulation of biosynthetic process	4	P51948,Q969G3,Q9BXP5,Q92945,Q9HCK8,Q9NV56,P49711,P56270,O14776,P52298,Q15651,Q9NRZ9,P35269,O60832,Q09161,P17096,Q9NWH9,O00622,O14979,Q00839,P02545,Q15072,P17028,Q13330,Q9BUI4,P13984,Q86U70,Q92804
9.86e-13	5882	31	GO:0080090	BP	regulation of primary metabolic process	4	P51948,Q969G3,Q9BXP5,Q92945,Q9ULW0,Q9HCK8,Q9NV56,P49711,P56270,O14776,P52298,Q15651,Q9NRZ9,P35269,O60832,Q09161,P17096,Q9NWH9,O00622,Q8WVV9,O14979,Q00839,P02545,Q15072,P17028,P52292,Q13330,Q9BUI4,P13984,Q86U70,Q92804
1	299	1	GO:0019216	BP	regulation of lipid metabolic process	5	O00622
1	135	1	GO:0046890	BP	regulation of lipid biosynthetic process	6	O00622
9.79e-15	5894	33	GO:0060255	BP	regulation of macromolecule metabolic process	4	P51948,Q969G3,Q9BXP5,Q92945,Q9ULW0,Q9HCK8,Q9NV56,P49711,P56270,Q99567,O14776,P52298,Q15651,Q9NRZ9,P35269,P35658,O60832,Q09161,P17096,Q9NWH9,O00622,Q8WVV9,O14979,Q00839,P02545,Q15072,P17028,P52292,Q13330,Q9BUI4,P13984,Q86U70,Q92804
5.79e-14	4061	28	GO:0010556	BP	regulation of macromolecule biosynthetic process	5	P51948,Q969G3,Q9BXP5,Q92945,Q9HCK8,Q9NV56,P49711,P56270,O14776,P52298,Q15651,Q9NRZ9,P35269,O60832,Q09161,P17096,Q9NWH9,O00622,O14979,Q00839,P02545,Q15072,P17028,Q13330,Q9BUI4,P13984,Q86U70,Q92804
1.62e-16	4330	31	GO:0010468	BP	regulation of gene expression	5	P51948,Q969G3,Q9BXP5,Q92945,Q9HCK8,Q9NV56,P49711,P56270,Q99567,O14776,P52298,Q15651,Q9NRZ9,P35269,P35658,O60832,Q09161,P17096,Q9NWH9,O00622,Q8WVV9,O14979,Q00839,P02545,Q15072,P17028,Q13330,Q9BUI4,P13984,Q86U70,Q92804
0.00082	454	7	GO:0010608	BP	posttranscriptional regulation of gene expression	6	Q9BXP5,Q92945,P52298,P35658,O60832,Q09161,Q00839
0.0293	143	4	GO:0043487	BP	regulation of RNA stability	7	Q92945,P35658,O60832,Q00839
1	35	2	GO:0043489	BP	RNA stabilization	8	O60832,Q00839
1	1	1	GO:0090669	BP	telomerase RNA stabilization	9	O60832
0.807	139	3	GO:0043488	BP	regulation of mRNA stability	8	Q92945,P35658,Q00839
1	34	1	GO:0048255	BP	mRNA stabilization	9	Q00839
1	5	1	GO:0070934	BP	CRD-mediated mRNA stabilization	10	Q00839
0.00152	308	6	GO:0040029	BP	regulation of gene expression, epigenetic	6	P51948,Q9BXP5,P49711,Q9NRZ9,P17096,Q13330
1	89	2	GO:0006306	BP	DNA methylation	7	P49711,Q9NRZ9
1	61	2	GO:0032922	BP	circadian regulation of gene expression	6	Q00839,Q13330
1	2653	9	GO:0051246	BP	regulation of protein metabolic process	5	P51948,Q9BXP5,Q9ULW0,P49711,P52298,Q09161,O00622,Q13330,Q86U70
1	727	1	GO:0030162	BP	regulation of proteolysis	6	O00622
1	27	1	GO:0071514	BP	genetic imprinting	5	P49711
1	17	1	GO:0006349	BP	regulation of gene expression by genetic imprinting	6	P49711
2.35e-15	4346	30	GO:0051171	BP	regulation of nitrogen compound metabolic process	4	P51948,Q969G3,Q9BXP5,Q92945,Q9HCK8,Q9NV56,P49711,P56270,O14776,P52298,Q15651,Q9NRZ9,P35269,O60832,Q09161,P17096,Q9NWH9,O00622,Q8WVV9,O14979,Q00839,P02545,Q15072,P17028,P52292,Q13330,Q9BUI4,P13984,Q86U70,Q92804
3.6e-06	3661	19	GO:0009893	BP	positive regulation of metabolic process	4	P51948,Q9ULW0,Q9HCK8,P49711,P52298,Q15651,P35269,O60832,Q09161,P17096,O00622,Q8WVV9,Q00839,P02545,P18754,Q13330,P13984,Q86U70,Q92804
6.78e-06	1840	14	GO:0009891	BP	positive regulation of biosynthetic process	5	P51948,Q9HCK8,P49711,P52298,Q15651,P35269,O60832,Q09161,P17096,O00622,P02545,P13984,Q86U70,Q92804
5.95e-07	1827	15	GO:0051173	BP	positive regulation of nitrogen compound metabolic process	5	P51948,Q9HCK8,P49711,P52298,Q15651,P35269,O60832,Q09161,P17096,O00622,Q8WVV9,P02545,P13984,Q86U70,Q92804
7.96e-07	2940	18	GO:0010604	BP	positive regulation of macromolecule metabolic process	5	P51948,Q9ULW0,Q9HCK8,P49711,P52298,Q15651,P35269,O60832,Q09161,P17096,O00622,Q8WVV9,Q00839,P02545,Q13330,P13984,Q86U70,Q92804
4.39e-07	1787	15	GO:0010628	BP	positive regulation of gene expression	6	P51948,Q9HCK8,P49711,P52298,Q15651,P35269,Q09161,P17096,O00622,Q8WVV9,Q00839,P02545,P13984,Q86U70,Q92804
1	78	1	GO:0045815	BP	positive regulation of gene expression, epigenetic	7	P17096
1	1592	4	GO:0051247	BP	positive regulation of protein metabolic process	6	Q9ULW0,O00622,Q13330,Q86U70
2.13e-06	1680	14	GO:0010557	BP	positive regulation of macromolecule biosynthetic process	6	P51948,Q9HCK8,P49711,P52298,Q15651,P35269,O60832,Q09161,P17096,O00622,P02545,P13984,Q86U70,Q92804
1	133	1	GO:0045834	BP	positive regulation of lipid metabolic process	5	O00622
1	70	1	GO:0046889	BP	positive regulation of lipid biosynthetic process	6	O00622
1	2378	7	GO:0050790	BP	regulation of catalytic activity	4	P51948,Q9ULW0,P35269,O60832,O00622,Q00839,P18754
1	1286	3	GO:0051336	BP	regulation of hydrolase activity	5	O00622,Q00839,P18754
1	116	1	GO:0060191	BP	regulation of lipase activity	6	O00622
1	96	1	GO:0010517	BP	regulation of phospholipase activity	7	O00622
1	573	1	GO:0043087	BP	regulation of GTPase activity	6	P18754
1	58	1	GO:0043462	BP	regulation of ATPase activity	6	Q00839
1	400	1	GO:0052547	BP	regulation of peptidase activity	6	O00622
1	379	1	GO:0052548	BP	regulation of endopeptidase activity	7	O00622
1	218	1	GO:2000116	BP	regulation of cysteine-type endopeptidase activity	8	O00622
1	5	1	GO:0010911	BP	regulation of isomerase activity	5	Q00839
1	4	1	GO:2000371	BP	regulation of DNA topoisomerase (ATP-hydrolyzing) activity	6	Q00839
1	1058	4	GO:0051338	BP	regulation of transferase activity	5	P51948,Q9ULW0,O60832,O00622
1	1563	6	GO:0043085	BP	positive regulation of catalytic activity	5	Q9ULW0,P35269,O60832,O00622,Q00839,P18754
1	5	1	GO:0010912	BP	positive regulation of isomerase activity	6	Q00839
1	724	3	GO:0051347	BP	positive regulation of transferase activity	6	Q9ULW0,O60832,O00622
1	852	3	GO:0051345	BP	positive regulation of hydrolase activity	6	O00622,Q00839,P18754
1	100	1	GO:0060193	BP	positive regulation of lipase activity	7	O00622
1	86	1	GO:0010518	BP	positive regulation of phospholipase activity	8	O00622
1	522	1	GO:0043547	BP	positive regulation of GTPase activity	7	P18754
1	40	1	GO:0032781	BP	positive regulation of ATPase activity	7	Q00839
1	4	1	GO:2000373	BP	positive regulation of DNA topoisomerase (ATP-hydrolyzing) activity	8	Q00839
1	3034	7	GO:0023051	BP	regulation of signaling	3	Q9HCK8,Q9Y657,Q15651,Q9NRZ9,Q9NZM1,O00622,P02545
1	1608	2	GO:0023056	BP	positive regulation of signaling	4	Q9Y657,O00622
1	1562	3	GO:0002682	BP	regulation of immune system process	3	Q6P6C2,Q9BUI4,Q86U70
1	422	1	GO:0002697	BP	regulation of immune effector process	4	Q6P6C2
1	192	1	GO:0050688	BP	regulation of defense response to virus	5	Q6P6C2
1	136	1	GO:0050691	BP	regulation of defense response to virus by host	6	Q6P6C2
1	125	1	GO:0002230	BP	positive regulation of defense response to virus by host	7	Q6P6C2
1	955	1	GO:0002684	BP	positive regulation of immune system process	4	Q9BUI4
1	1024	1	GO:0050776	BP	regulation of immune response	4	Q9BUI4
1	682	1	GO:0050778	BP	positive regulation of immune response	5	Q9BUI4
1	405	1	GO:0045088	BP	regulation of innate immune response	5	Q9BUI4
1	337	1	GO:0045089	BP	positive regulation of innate immune response	6	Q9BUI4
1	2175	5	GO:0050793	BP	regulation of developmental process	3	Q9BXP5,P17096,O00622,P02545,Q86U70
1	1631	4	GO:2000026	BP	regulation of multicellular organismal development	4	Q9BXP5,O00622,P02545,Q86U70
1	1	1	GO:1904177	BP	regulation of adipose tissue development	5	P02545
1	762	1	GO:0051960	BP	regulation of nervous system development	5	Q9BXP5
1	62	1	GO:0061035	BP	regulation of cartilage development	5	O00622
1	327	1	GO:1903706	BP	regulation of hemopoiesis	5	Q86U70
1	1175	4	GO:0051094	BP	positive regulation of developmental process	4	Q9BXP5,P17096,O00622,P02545
1	444	1	GO:0051962	BP	positive regulation of nervous system development	5	Q9BXP5
1	29	1	GO:0061036	BP	positive regulation of cartilage development	5	O00622
1	658	3	GO:0040008	BP	regulation of growth	3	Q9NV56,Q09161,O00622
1	248	1	GO:0045927	BP	positive regulation of growth	4	Q09161
1.46e-14	10414	41	GO:0050794	BP	regulation of cellular process	3	P51948,Q969G3,Q9BXP5,Q92945,Q9ULW0,O00541,Q9HCK8,Q9NV56,P49711,P56270,Q9Y657,Q99567,O14776,P52298,Q15651,Q9NRZ9,P35269,P35658,O60832,Q09161,P17096,Q9NWH9,Q9NZM1,O00622,Q8WVV9,P25705,O14979,Q00839,P02545,Q9BZZ5,Q15072,P17028,P18754,P34897,P52292,Q13330,Q9BUI4,P13984,O75717,Q86U70,Q92804
0.0572	57	3	GO:0044068	BP	modulation by symbiont of host cellular process	4	Q99567,P35658,P52292
0.0486	54	3	GO:0019054	BP	modulation by virus of host process	5	Q99567,P35658,P52292
1	33	2	GO:0090342	BP	regulation of cell aging	4	P17096,P02545
1	650	3	GO:0080135	BP	regulation of cellular response to stress	4	Q99567,P35658,P17096
1	77	2	GO:1900034	BP	regulation of cellular response to heat	5	Q99567,P35658
1	26	1	GO:2000772	BP	regulation of cellular senescence	5	P17096
4.5e-05	4770	20	GO:0048522	BP	positive regulation of cellular process	4	P51948,Q9BXP5,Q9ULW0,Q9HCK8,P49711,Q9Y657,P52298,Q15651,P35269,O60832,Q09161,P17096,O00622,Q8WVV9,P02545,P34897,Q13330,P13984,Q86U70,Q92804
0.0312	6	2	GO:0090343	BP	positive regulation of cell aging	5	P17096,P02545
1	5	1	GO:2000774	BP	positive regulation of cellular senescence	6	P17096
1	645	2	GO:0030155	BP	regulation of cell adhesion	4	O00622,Q86U70
1	178	1	GO:0010810	BP	regulation of cell-substrate adhesion	5	O00622
1	390	2	GO:0045785	BP	positive regulation of cell adhesion	5	O00622,Q86U70
1	107	1	GO:0010811	BP	positive regulation of cell-substrate adhesion	6	O00622
1	1550	5	GO:0042127	BP	regulation of cell proliferation	4	P51948,P17096,O00622,P25705,P34897
1	23	1	GO:0033688	BP	regulation of osteoblast proliferation	5	O00622
1	291	1	GO:0050678	BP	regulation of epithelial cell proliferation	5	P25705
1	96	1	GO:0001936	BP	regulation of endothelial cell proliferation	6	P25705
1	859	3	GO:0008284	BP	positive regulation of cell proliferation	5	P51948,O00622,P34897
1	11	1	GO:0033690	BP	positive regulation of osteoblast proliferation	6	O00622
1	101	1	GO:0048660	BP	regulation of smooth muscle cell proliferation	5	P51948
1	62	1	GO:0048661	BP	positive regulation of smooth muscle cell proliferation	6	P51948
0.0241	2207	11	GO:0051128	BP	regulation of cellular component organization	4	Q9ULW0,P49711,O60832,Q09161,P17096,O00622,Q00839,P02545,P18754,P13984,O75717
0.0272	1083	8	GO:0033043	BP	regulation of organelle organization	5	Q9ULW0,P49711,O60832,P17096,Q00839,P02545,P18754,O75717
1	213	1	GO:0010821	BP	regulation of mitochondrion organization	6	P02545
1	428	1	GO:0051493	BP	regulation of cytoskeleton organization	6	Q9ULW0
0.0243	290	5	GO:0033044	BP	regulation of chromosome organization	6	P49711,O60832,P17096,Q00839,O75717
1	152	2	GO:1902275	BP	regulation of chromatin organization	7	P49711,P17096
1	145	2	GO:1903308	BP	regulation of chromatin modification	8	P49711,P17096
1	1142	2	GO:0051130	BP	positive regulation of cellular component organization	5	O60832,P13984
1	582	1	GO:0010638	BP	positive regulation of organelle organization	6	O60832
1	142	1	GO:2001252	BP	positive regulation of chromosome organization	7	O60832
1	395	2	GO:0001558	BP	regulation of cell growth	5	Q09161,O00622
1	151	1	GO:0030307	BP	positive regulation of cell growth	6	Q09161
1	367	1	GO:0043254	BP	regulation of protein complex assembly	5	P13984
1	206	1	GO:0031334	BP	positive regulation of protein complex assembly	6	P13984
1	91	1	GO:0051983	BP	regulation of chromosome segregation	4	P49711
1.45e-12	5964	31	GO:0031323	BP	regulation of cellular metabolic process	4	P51948,Q969G3,Q9BXP5,Q92945,Q9ULW0,Q9HCK8,Q9NV56,P49711,P56270,O14776,P52298,Q15651,Q9NRZ9,P35269,O60832,Q09161,P17096,Q9NWH9,O00622,Q8WVV9,O14979,Q00839,P02545,Q15072,P17028,P52292,Q13330,Q9BUI4,P13984,Q86U70,Q92804
0.963	354	4	GO:0034248	BP	regulation of cellular amide metabolic process	5	Q9BXP5,P52298,Q09161,O00622
1.85e-13	4248	28	GO:0031326	BP	regulation of cellular biosynthetic process	5	P51948,Q969G3,Q9BXP5,Q92945,Q9HCK8,Q9NV56,P49711,P56270,O14776,P52298,Q15651,Q9NRZ9,P35269,O60832,Q09161,P17096,Q9NWH9,O00622,O14979,Q00839,P02545,Q15072,P17028,Q13330,Q9BUI4,P13984,Q86U70,Q92804
2.81e-14	3949	28	GO:2000112	BP	regulation of cellular macromolecule biosynthetic process	6	P51948,Q969G3,Q9BXP5,Q92945,Q9HCK8,Q9NV56,P49711,P56270,O14776,P52298,Q15651,Q9NRZ9,P35269,O60832,Q09161,P17096,Q9NWH9,O00622,O14979,Q00839,P02545,Q15072,P17028,Q13330,Q9BUI4,P13984,Q86U70,Q92804
1	5	1	GO:0046984	BP	regulation of hemoglobin biosynthetic process	7	Q86U70
1	13	1	GO:0090153	BP	regulation of sphingolipid biosynthetic process	6	O00622
1	11	1	GO:2000303	BP	regulation of ceramide biosynthetic process	7	O00622
3.2e-16	4046	30	GO:0019219	BP	regulation of nucleobase-containing compound metabolic process	5	P51948,Q969G3,Q9BXP5,Q92945,Q9HCK8,Q9NV56,P49711,P56270,O14776,P52298,Q15651,Q9NRZ9,P35269,O60832,Q09161,P17096,Q9NWH9,O00622,Q8WVV9,O14979,Q00839,P02545,Q15072,P17028,P52292,Q13330,Q9BUI4,P13984,Q86U70,Q92804
1	341	3	GO:0051052	BP	regulation of DNA metabolic process	6	O60832,Q00839,P52292
1	61	1	GO:0000018	BP	regulation of DNA recombination	7	P52292
1	158	2	GO:0006275	BP	regulation of DNA replication	7	O60832,Q00839
1	69	1	GO:2000278	BP	regulation of DNA biosynthetic process	7	O60832
1	41	1	GO:0051972	BP	regulation of telomerase activity	8	O60832
1	67	2	GO:0032204	BP	regulation of telomere maintenance	7	O60832,Q00839
1	50	2	GO:1904356	BP	regulation of telomere maintenance via telomere lengthening	8	O60832,Q00839
1	45	2	GO:0032210	BP	regulation of telomere maintenance via telomerase	9	O60832,Q00839
7.58e-14	3720	27	GO:0051252	BP	regulation of RNA metabolic process	6	P51948,Q969G3,Q9BXP5,Q92945,Q9HCK8,Q9NV56,P49711,P56270,O14776,P52298,Q15651,Q9NRZ9,P35269,Q09161,P17096,Q9NWH9,O00622,Q8WVV9,O14979,P02545,Q15072,P17028,Q13330,Q9BUI4,P13984,Q86U70,Q92804
1	114	2	GO:1903311	BP	regulation of mRNA metabolic process	7	P52298,Q09161
1	99	2	GO:0050684	BP	regulation of mRNA processing	8	P52298,Q09161
0.774	28	2	GO:0031440	BP	regulation of mRNA 3'-end processing	9	P52298,Q09161
1	8	1	GO:2000628	BP	regulation of miRNA metabolic process	7	Q92945
1	94	1	GO:0043484	BP	regulation of RNA splicing	7	Q8WVV9
4.71e-13	3620	26	GO:2001141	BP	regulation of RNA biosynthetic process	7	P51948,Q969G3,Q9BXP5,Q92945,Q9HCK8,Q9NV56,P49711,P56270,O14776,P52298,Q15651,Q9NRZ9,P35269,Q09161,P17096,Q9NWH9,O00622,O14979,P02545,Q15072,P17028,Q13330,Q9BUI4,P13984,Q86U70,Q92804
5.19e-11	3601	24	GO:1903506	BP	regulation of nucleic acid-templated transcription	8	P51948,Q969G3,Q9BXP5,Q92945,Q9HCK8,Q9NV56,P49711,P56270,O14776,Q15651,Q9NRZ9,P35269,P17096,Q9NWH9,O00622,O14979,P02545,Q15072,P17028,Q13330,Q9BUI4,P13984,Q86U70,Q92804
4.59e-11	3581	24	GO:0006355	BP	regulation of transcription, DNA-templated	9	P51948,Q969G3,Q9BXP5,Q92945,Q9HCK8,Q9NV56,P49711,P56270,O14776,Q15651,Q9NRZ9,P35269,P17096,Q9NWH9,O00622,O14979,P02545,Q15072,P17028,Q13330,Q9BUI4,P13984,Q86U70,Q92804
1	372	1	GO:0051090	BP	regulation of sequence-specific DNA binding transcription factor activity	10	Q15651
0.616	25	2	GO:0006359	BP	regulation of transcription from RNA polymerase III promoter	10	Q9HCK8,Q9BUI4
5.94e-06	1821	14	GO:0006357	BP	regulation of transcription from RNA polymerase II promoter	10	P51948,Q969G3,Q9HCK8,Q9NV56,P49711,P56270,O14776,Q15651,P35269,P17096,O00622,P02545,P13984,Q86U70
0.028	45	3	GO:0032784	BP	regulation of DNA-templated transcription, elongation	10	P35269,P13984,Q86U70
0.616	25	2	GO:0034243	BP	regulation of transcription elongation from RNA polymerase II promoter	11	P35269,P13984
1	32	1	GO:2000142	BP	regulation of DNA-templated transcription, initiation	10	P13984
1	24	1	GO:0060260	BP	regulation of transcription initiation from RNA polymerase II promoter	11	P13984
1	15	1	GO:0045898	BP	regulation of RNA polymerase II transcriptional preinitiation complex assembly	12	P13984
1	1758	3	GO:0051174	BP	regulation of phosphorus metabolic process	5	P51948,Q9ULW0,O00622
1	1745	3	GO:0019220	BP	regulation of phosphate metabolic process	6	P51948,Q9ULW0,O00622
1	1506	3	GO:0042325	BP	regulation of phosphorylation	7	P51948,Q9ULW0,O00622
1	933	3	GO:0043549	BP	regulation of kinase activity	8	P51948,Q9ULW0,O00622
6.99e-06	2955	17	GO:0031325	BP	positive regulation of cellular metabolic process	5	P51948,Q9ULW0,Q9HCK8,P49711,P52298,Q15651,P35269,O60832,Q09161,P17096,O00622,Q8WVV9,P02545,Q13330,P13984,Q86U70,Q92804
1	1178	2	GO:0010562	BP	positive regulation of phosphorus metabolic process	6	Q9ULW0,O00622
1	1178	2	GO:0045937	BP	positive regulation of phosphate metabolic process	7	Q9ULW0,O00622
1	1057	2	GO:0042327	BP	positive regulation of phosphorylation	8	Q9ULW0,O00622
1	647	2	GO:0033674	BP	positive regulation of kinase activity	9	Q9ULW0,O00622
2.88e-07	1733	15	GO:0045935	BP	positive regulation of nucleobase-containing compound metabolic process	6	P51948,Q9HCK8,P49711,P52298,Q15651,P35269,O60832,Q09161,P17096,O00622,Q8WVV9,P02545,P13984,Q86U70,Q92804
5.66e-07	1516	14	GO:0051254	BP	positive regulation of RNA metabolic process	7	P51948,Q9HCK8,P49711,P52298,Q15651,P35269,Q09161,P17096,O00622,Q8WVV9,P02545,P13984,Q86U70,Q92804
1	45	2	GO:1903313	BP	positive regulation of mRNA metabolic process	8	P52298,Q09161
1	34	2	GO:0050685	BP	positive regulation of mRNA processing	9	P52298,Q09161
0.281	17	2	GO:0031442	BP	positive regulation of mRNA 3'-end processing	10	P52298,Q09161
1	27	1	GO:0033120	BP	positive regulation of RNA splicing	8	Q8WVV9
1	180	1	GO:0051054	BP	positive regulation of DNA metabolic process	7	O60832
1	45	1	GO:0032206	BP	positive regulation of telomere maintenance	8	O60832
1	33	1	GO:1904358	BP	positive regulation of telomere maintenance via telomere lengthening	9	O60832
1	106	1	GO:0034250	BP	positive regulation of cellular amide metabolic process	6	O00622
5.42e-06	1808	14	GO:0031328	BP	positive regulation of cellular biosynthetic process	6	P51948,Q9HCK8,P49711,P52298,Q15651,P35269,O60832,Q09161,P17096,O00622,P02545,P13984,Q86U70,Q92804
4.82e-06	1478	13	GO:1902680	BP	positive regulation of RNA biosynthetic process	7	P51948,Q9HCK8,P49711,P52298,Q15651,P35269,Q09161,P17096,O00622,P02545,P13984,Q86U70,Q92804
0.000422	1451	11	GO:1903508	BP	positive regulation of nucleic acid-templated transcription	8	P51948,Q9HCK8,P49711,Q15651,P35269,P17096,O00622,P02545,P13984,Q86U70,Q92804
0.000422	1451	11	GO:0045893	BP	positive regulation of transcription, DNA-templated	9	P51948,Q9HCK8,P49711,Q15651,P35269,P17096,O00622,P02545,P13984,Q86U70,Q92804
0.00018	1038	10	GO:0045944	BP	positive regulation of transcription from RNA polymerase II promoter	10	P51948,Q9HCK8,P49711,Q15651,P35269,P17096,O00622,P02545,P13984,Q86U70
1	11	1	GO:0045945	BP	positive regulation of transcription from RNA polymerase III promoter	10	Q9HCK8
0.567	24	2	GO:0032786	BP	positive regulation of DNA-templated transcription, elongation	10	P35269,P13984
0.188	14	2	GO:0032968	BP	positive regulation of transcription elongation from RNA polymerase II promoter	11	P35269,P13984
1	228	1	GO:0051091	BP	positive regulation of sequence-specific DNA binding transcription factor activity	10	Q15651
1	26	1	GO:2000144	BP	positive regulation of DNA-templated transcription, initiation	10	P13984
1	19	1	GO:0060261	BP	positive regulation of transcription initiation from RNA polymerase II promoter	11	P13984
1	12	1	GO:0045899	BP	positive regulation of RNA polymerase II transcriptional preinitiation complex assembly	12	P13984
1	9	1	GO:0090154	BP	positive regulation of sphingolipid biosynthetic process	7	O00622
1	9	1	GO:2000304	BP	positive regulation of ceramide biosynthetic process	8	O00622
1	3	1	GO:0046985	BP	positive regulation of hemoglobin biosynthetic process	7	Q86U70
1	90	1	GO:0045740	BP	positive regulation of DNA replication	7	O60832
1	32	1	GO:0032212	BP	positive regulation of telomere maintenance via telomerase	8	O60832
1	43	1	GO:2000573	BP	positive regulation of DNA biosynthetic process	7	O60832
1	28	1	GO:0051973	BP	positive regulation of telomerase activity	8	O60832
1	2477	8	GO:0032268	BP	regulation of cellular protein metabolic process	5	P51948,Q9BXP5,Q9ULW0,P49711,P52298,Q09161,O00622,Q13330
1	1807	5	GO:0031399	BP	regulation of protein modification process	6	P51948,Q9ULW0,P49711,O00622,Q13330
1	297	1	GO:1903320	BP	regulation of protein modification by small protein conjugation or removal	7	Q13330
1	278	1	GO:0031396	BP	regulation of protein ubiquitination	8	Q13330
1	3	1	GO:1902498	BP	regulation of protein autoubiquitination	9	Q13330
1	62	1	GO:1901983	BP	regulation of protein acetylation	7	P49711
1	54	1	GO:2000756	BP	regulation of peptidyl-lysine acetylation	8	P49711
1	1412	3	GO:0001932	BP	regulation of protein phosphorylation	7	P51948,Q9ULW0,O00622
1	881	3	GO:0045859	BP	regulation of protein kinase activity	8	P51948,Q9ULW0,O00622
1	616	1	GO:0071900	BP	regulation of protein serine/threonine kinase activity	9	P51948
1	130	1	GO:0031056	BP	regulation of histone modification	7	P49711
1	60	1	GO:0031060	BP	regulation of histone methylation	8	P49711
1	50	1	GO:0035065	BP	regulation of histone acetylation	8	P49711
1	1495	3	GO:0032270	BP	positive regulation of cellular protein metabolic process	6	Q9ULW0,O00622,Q13330
1	360	1	GO:0045862	BP	positive regulation of proteolysis	7	O00622
1	156	1	GO:0010952	BP	positive regulation of peptidase activity	8	O00622
1	145	1	GO:0010950	BP	positive regulation of endopeptidase activity	9	O00622
1	132	1	GO:2001056	BP	positive regulation of cysteine-type endopeptidase activity	10	O00622
1	1228	3	GO:0031401	BP	positive regulation of protein modification process	7	Q9ULW0,O00622,Q13330
1	194	1	GO:1903322	BP	positive regulation of protein modification by small protein conjugation or removal	8	Q13330
1	181	1	GO:0031398	BP	positive regulation of protein ubiquitination	9	Q13330
1	2	1	GO:1902499	BP	positive regulation of protein autoubiquitination	10	Q13330
1	1017	2	GO:0001934	BP	positive regulation of protein phosphorylation	8	Q9ULW0,O00622
1	619	2	GO:0045860	BP	positive regulation of protein kinase activity	9	Q9ULW0,O00622
1	472	1	GO:0032147	BP	activation of protein kinase activity	10	Q9ULW0
1	326	3	GO:0006417	BP	regulation of translation	6	Q9BXP5,P52298,Q09161
1	83	2	GO:0006446	BP	regulation of translational initiation	7	P52298,Q09161
1	1040	6	GO:0051726	BP	regulation of cell cycle	4	P51948,Q9ULW0,O00541,P49711,P35658,P18754
1	152	1	GO:1904029	BP	regulation of cyclin-dependent protein kinase activity	5	P51948
1	92	1	GO:0000079	BP	regulation of cyclin-dependent protein serine/threonine kinase activity	6	P51948
1	491	2	GO:0007346	BP	regulation of mitotic cell cycle	5	Q9ULW0,P18754
1	562	3	GO:0010564	BP	regulation of cell cycle process	5	Q9ULW0,P49711,P18754
1	74	1	GO:0033045	BP	regulation of sister chromatid segregation	6	P49711
1	15	1	GO:0007063	BP	regulation of sister chromatid cohesion	7	P49711
1	3	1	GO:0070602	BP	regulation of centromeric sister chromatid cohesion	8	P49711
1	317	1	GO:0051302	BP	regulation of cell division	4	P18754
1	172	1	GO:0051783	BP	regulation of nuclear division	5	P18754
1	149	1	GO:0007088	BP	regulation of mitotic nuclear division	6	P18754
1	163	1	GO:0032886	BP	regulation of microtubule-based process	4	Q9ULW0
1	136	1	GO:0070507	BP	regulation of microtubule cytoskeleton organization	5	Q9ULW0
1	23	1	GO:0090224	BP	regulation of spindle organization	6	Q9ULW0
1	19	1	GO:0060236	BP	regulation of mitotic spindle organization	7	Q9ULW0
1	1270	4	GO:0060341	BP	regulation of cellular localization	4	P52298,Q15651,O60832,P02545
1	643	1	GO:1903530	BP	regulation of secretion by cell	5	Q15651
1	408	1	GO:0050708	BP	regulation of protein secretion	6	Q15651
1	549	2	GO:1903827	BP	regulation of cellular protein localization	5	O60832,P02545
1	12	1	GO:1904814	BP	regulation of protein localization to chromosome, telomeric region	6	O60832
1	348	1	GO:1903829	BP	positive regulation of cellular protein localization	6	O60832
1	10	1	GO:1904816	BP	positive regulation of protein localization to chromosome, telomeric region	7	O60832
1	215	1	GO:1900180	BP	regulation of protein localization to nucleus	6	P02545
1	11	1	GO:0070202	BP	regulation of establishment of protein localization to chromosome	6	O60832
1	10	1	GO:0070203	BP	regulation of establishment of protein localization to telomere	7	O60832
1	9	1	GO:1904851	BP	positive regulation of establishment of protein localization to telomere	8	O60832
1	618	1	GO:0032386	BP	regulation of intracellular transport	5	P52298
1	458	1	GO:1903649	BP	regulation of cytoplasmic transport	6	P52298
1	217	1	GO:0046822	BP	regulation of nucleocytoplasmic transport	7	P52298
1	9	1	GO:0046831	BP	regulation of RNA export from nucleus	8	P52298
1	362	1	GO:0032388	BP	positive regulation of intracellular transport	6	P52298
1	272	1	GO:1903651	BP	positive regulation of cytoplasmic transport	7	P52298
1	115	1	GO:0046824	BP	positive regulation of nucleocytoplasmic transport	8	P52298
1	2	1	GO:0046833	BP	positive regulation of RNA export from nucleus	9	P52298
1	3048	7	GO:0010646	BP	regulation of cell communication	4	Q9HCK8,Q9Y657,Q15651,Q9NRZ9,Q9NZM1,O00622,P02545
1	1627	2	GO:0010647	BP	positive regulation of cell communication	5	Q9Y657,O00622
1	280	1	GO:0046883	BP	regulation of hormone secretion	5	Q15651
1	229	1	GO:0090276	BP	regulation of peptide hormone secretion	6	Q15651
1	198	1	GO:0050796	BP	regulation of insulin secretion	7	Q15651
1	54	1	GO:0061178	BP	regulation of insulin secretion involved in cellular response to glucose stimulus	8	Q15651
1	1585	6	GO:0010941	BP	regulation of cell death	4	P51948,Q9HCK8,Q9NRZ9,O00622,P02545,Q9BZZ5
1	1497	6	GO:0043067	BP	regulation of programmed cell death	5	P51948,Q9HCK8,Q9NRZ9,O00622,P02545,Q9BZZ5
1	1484	6	GO:0042981	BP	regulation of apoptotic process	6	P51948,Q9HCK8,Q9NRZ9,O00622,P02545,Q9BZZ5
0.248	16	2	GO:2000269	BP	regulation of fibroblast apoptotic process	7	Q9HCK8,Q9BZZ5
1	205	1	GO:0043281	BP	regulation of cysteine-type endopeptidase activity involved in apoptotic process	7	O00622
1	635	1	GO:0010942	BP	positive regulation of cell death	5	O00622
1	602	1	GO:0043068	BP	positive regulation of programmed cell death	6	O00622
1	597	1	GO:0043065	BP	positive regulation of apoptotic process	7	O00622
1	122	1	GO:0043280	BP	positive regulation of cysteine-type endopeptidase activity involved in apoptotic process	8	O00622
1	762	2	GO:0051270	BP	regulation of cellular component movement	4	O00622,P02545
1	413	1	GO:0051272	BP	positive regulation of cellular component movement	5	O00622
1	704	2	GO:2000145	BP	regulation of cell motility	5	O00622,P02545
1	665	2	GO:0030334	BP	regulation of cell migration	6	O00622,P02545
1	402	1	GO:2000147	BP	positive regulation of cell motility	6	O00622
1	390	1	GO:0030335	BP	positive regulation of cell migration	7	O00622
1	1531	4	GO:0045595	BP	regulation of cell differentiation	4	Q9BXP5,O00622,P02545,Q86U70
1	854	1	GO:0060284	BP	regulation of cell development	5	Q9BXP5
1	672	1	GO:0050767	BP	regulation of neurogenesis	6	Q9BXP5
1	847	3	GO:0045597	BP	positive regulation of cell differentiation	5	Q9BXP5,O00622,P02545
1	483	1	GO:0010720	BP	positive regulation of cell development	6	Q9BXP5
1	382	1	GO:0050769	BP	positive regulation of neurogenesis	7	Q9BXP5
1	115	2	GO:0045667	BP	regulation of osteoblast differentiation	5	O00622,P02545
1	62	2	GO:0045669	BP	positive regulation of osteoblast differentiation	6	O00622,P02545
1	186	1	GO:0045637	BP	regulation of myeloid cell differentiation	5	Q86U70
1	36	1	GO:0045646	BP	regulation of erythrocyte differentiation	6	Q86U70
1	5865	11	GO:0007165	BP	signal transduction	4	Q9HCK8,Q9Y657,Q99567,Q9NRZ9,P35658,Q9NZM1,O00622,P02545,P52292,Q13330,Q86U70
1	2832	9	GO:0007166	BP	cell surface receptor signaling pathway	5	Q9HCK8,Q9Y657,Q99567,P35658,Q9NZM1,O00622,P02545,P52292,Q86U70
1	1261	2	GO:0007167	BP	enzyme linked receptor protein signaling pathway	6	Q9NZM1,O00622
1	347	1	GO:0007178	BP	transmembrane receptor protein serine/threonine kinase signaling pathway	7	O00622
1	144	1	GO:0030509	BP	BMP signaling pathway	8	O00622
1	945	1	GO:0007169	BP	transmembrane receptor protein tyrosine kinase signaling pathway	7	Q9NZM1
1	301	1	GO:0048010	BP	vascular endothelial growth factor receptor signaling pathway	8	Q9NZM1
1	429	3	GO:0016055	BP	Wnt signaling pathway	6	Q9HCK8,Q9Y657,Q86U70
1	295	1	GO:0060070	BP	canonical Wnt signaling pathway	7	Q9HCK8
1	612	3	GO:0019221	BP	cytokine-mediated signaling pathway	6	Q99567,P35658,P52292
1	2763	2	GO:0035556	BP	intracellular signal transduction	5	Q9NRZ9,O00622
1	42	1	GO:0006984	BP	ER-nucleus signaling pathway	5	P02545
1	10	1	GO:0032933	BP	SREBP signaling pathway	6	P02545
1	1	1	GO:0035105	BP	sterol regulatory element binding protein import into nucleus	7	P02545
1	2677	6	GO:0009966	BP	regulation of signal transduction	5	Q9HCK8,Q9Y657,Q9NRZ9,Q9NZM1,O00622,P02545
1	221	1	GO:0090092	BP	regulation of transmembrane receptor protein serine/threonine kinase signaling pathway	6	O00622
1	1674	2	GO:1902531	BP	regulation of intracellular signal transduction	6	Q9NRZ9,O00622
1	314	2	GO:0030111	BP	regulation of Wnt signaling pathway	6	Q9HCK8,Q9Y657
1	241	1	GO:0060828	BP	regulation of canonical Wnt signaling pathway	7	Q9HCK8
1	644	2	GO:0097190	BP	apoptotic signaling pathway	5	Q9NRZ9,P02545
1	238	1	GO:0097191	BP	extrinsic apoptotic signaling pathway	6	P02545
1	303	1	GO:0097193	BP	intrinsic apoptotic signaling pathway	6	Q9NRZ9
1	59	1	GO:0001836	BP	release of cytochrome c from mitochondria	6	P02545
1	391	2	GO:2001233	BP	regulation of apoptotic signaling pathway	6	Q9NRZ9,P02545
1	45	1	GO:0090199	BP	regulation of release of cytochrome c from mitochondria	7	P02545
1	161	1	GO:2001236	BP	regulation of extrinsic apoptotic signaling pathway	7	P02545
1	155	1	GO:2001242	BP	regulation of intrinsic apoptotic signaling pathway	7	Q9NRZ9
1	1470	2	GO:0009967	BP	positive regulation of signal transduction	5	Q9Y657,O00622
1	104	1	GO:0090100	BP	positive regulation of transmembrane receptor protein serine/threonine kinase signaling pathway	6	O00622
1	171	1	GO:0030177	BP	positive regulation of Wnt signaling pathway	6	Q9Y657
1	129	1	GO:0030968	BP	endoplasmic reticulum unfolded protein response	5	P02545
1	67	1	GO:0036498	BP	IRE1-mediated unfolded protein response	6	P02545
1	899	1	GO:0023014	BP	signal transduction by protein phosphorylation	5	O00622
1	869	1	GO:0000165	BP	MAPK cascade	6	O00622
1	250	1	GO:0070371	BP	ERK1 and ERK2 cascade	7	O00622
1	798	1	GO:0043408	BP	regulation of MAPK cascade	7	O00622
1	237	1	GO:0070372	BP	regulation of ERK1 and ERK2 cascade	8	O00622
0.00372	197	5	GO:0050792	BP	regulation of viral process	4	P51948,P52298,P35269,Q09161,P13984
0.00266	184	5	GO:1903900	BP	regulation of viral life cycle	5	P51948,P52298,P35269,Q09161,P13984
4.16e-05	80	5	GO:0046782	BP	regulation of viral transcription	6	P51948,P52298,P35269,Q09161,P13984
0.000189	108	5	GO:0048524	BP	positive regulation of viral process	5	P51948,P52298,P35269,Q09161,P13984
0.000142	102	5	GO:1903902	BP	positive regulation of viral life cycle	6	P51948,P52298,P35269,Q09161,P13984
7.38e-06	57	5	GO:0050434	BP	positive regulation of viral transcription	7	P51948,P52298,P35269,Q09161,P13984
1	245	2	GO:0090287	BP	regulation of cellular response to growth factor stimulus	4	Q9NZM1,O00622
1	29	1	GO:0030947	BP	regulation of vascular endothelial growth factor receptor signaling pathway	5	Q9NZM1
1	82	1	GO:0030510	BP	regulation of BMP signaling pathway	5	O00622
1	33	1	GO:0030513	BP	positive regulation of BMP signaling pathway	6	O00622
1	104	1	GO:0042752	BP	regulation of circadian rhythm	3	Q13330
1	27	1	GO:0009649	BP	entrainment of circadian clock	4	Q13330
1	19	1	GO:0043153	BP	entrainment of circadian clock by photoperiod	5	Q13330
2.96e-05	4652	20	GO:0048519	BP	negative regulation of biological process	2	P51948,Q969G3,Q9BXP5,Q9HCK8,P49711,Q99567,O14776,P52298,Q9NRZ9,P35658,Q09161,P17096,O00622,P25705,Q00839,P02545,Q9BZZ5,P17028,Q13330,Q86U70
1	174	2	GO:0032845	BP	negative regulation of homeostatic process	3	Q00839,Q86U70
1	1399	3	GO:0048585	BP	negative regulation of response to stimulus	3	Q9HCK8,Q9NRZ9,P02545
1	826	2	GO:0051093	BP	negative regulation of developmental process	3	P02545,Q86U70
1	1022	2	GO:0051241	BP	negative regulation of multicellular organismal process	3	P02545,Q86U70
1	1	1	GO:1904178	BP	negative regulation of adipose tissue development	4	P02545
0.00739	4275	16	GO:0048523	BP	negative regulation of cellular process	3	P51948,Q969G3,Q9BXP5,Q9HCK8,P49711,O14776,Q9NRZ9,P17096,O00622,P25705,Q00839,P02545,Q9BZZ5,P17028,Q13330,Q86U70
1	1232	3	GO:0010648	BP	negative regulation of cell communication	4	Q9HCK8,Q9NRZ9,P02545
1	629	3	GO:0051129	BP	negative regulation of cellular component organization	4	P17096,Q00839,P02545
1	324	3	GO:0010639	BP	negative regulation of organelle organization	5	P17096,Q00839,P02545
1	42	1	GO:0010823	BP	negative regulation of mitochondrion organization	6	P02545
1	124	2	GO:2001251	BP	negative regulation of chromosome organization	6	P17096,Q00839
1	47	1	GO:1903309	BP	negative regulation of chromatin modification	7	P17096
1	661	2	GO:0008285	BP	negative regulation of cell proliferation	4	P17096,P25705
1	119	1	GO:0050680	BP	negative regulation of epithelial cell proliferation	5	P25705
1	33	1	GO:0001937	BP	negative regulation of endothelial cell proliferation	6	P25705
0.805	947	6	GO:0060548	BP	negative regulation of cell death	4	P51948,Q9HCK8,Q9NRZ9,O00622,P02545,Q9BZZ5
0.552	882	6	GO:0043069	BP	negative regulation of programmed cell death	5	P51948,Q9HCK8,Q9NRZ9,O00622,P02545,Q9BZZ5
0.519	872	6	GO:0043066	BP	negative regulation of apoptotic process	6	P51948,Q9HCK8,Q9NRZ9,O00622,P02545,Q9BZZ5
0.0581	8	2	GO:2000270	BP	negative regulation of fibroblast apoptotic process	7	Q9HCK8,Q9BZZ5
1	627	1	GO:0045596	BP	negative regulation of cell differentiation	4	Q86U70
1.86e-05	2744	16	GO:0009892	BP	negative regulation of metabolic process	3	P51948,Q969G3,Q9BXP5,Q9HCK8,P49711,Q99567,O14776,P52298,Q9NRZ9,P35658,Q09161,P17096,Q00839,P17028,Q13330,Q86U70
4.14e-06	2468	16	GO:0010605	BP	negative regulation of macromolecule metabolic process	4	P51948,Q969G3,Q9BXP5,Q9HCK8,P49711,Q99567,O14776,P52298,Q9NRZ9,P35658,Q09161,P17096,Q00839,P17028,Q13330,Q86U70
8.75e-07	1568	14	GO:0010629	BP	negative regulation of gene expression	5	P51948,Q969G3,Q9BXP5,Q9HCK8,P49711,Q99567,O14776,P52298,Q9NRZ9,P35658,Q09161,P17096,P17028,Q86U70
1	166	3	GO:0045814	BP	negative regulation of gene expression, epigenetic	6	P51948,Q9NRZ9,P17096
1.2e-05	244	7	GO:0016458	BP	gene silencing	6	Q9BXP5,Q99567,P52298,Q9NRZ9,P35658,Q09161,P17096
0.000939	149	5	GO:0031047	BP	gene silencing by RNA	7	Q9BXP5,Q99567,P52298,P35658,Q09161
1	25	1	GO:0070918	BP	production of small RNA involved in gene silencing by RNA	8	Q9BXP5
1	43	1	GO:0060968	BP	regulation of gene silencing	7	P17096
1	16	1	GO:0060969	BP	negative regulation of gene silencing	8	P17096
1	48	1	GO:0016441	BP	posttranscriptional gene silencing	7	Q9BXP5
1	48	1	GO:0035194	BP	posttranscriptional gene silencing by RNA	8	Q9BXP5
1	1126	1	GO:0051248	BP	negative regulation of protein metabolic process	5	Q9BXP5
0.000885	1564	11	GO:0051172	BP	negative regulation of nitrogen compound metabolic process	4	Q969G3,Q9BXP5,Q9HCK8,P49711,O14776,Q9NRZ9,P17096,Q00839,P17028,Q13330,Q86U70
0.000858	1559	11	GO:0009890	BP	negative regulation of biosynthetic process	4	Q969G3,Q9BXP5,Q9HCK8,P49711,O14776,Q9NRZ9,P17096,Q00839,P17028,Q13330,Q86U70
0.000497	1475	11	GO:0010558	BP	negative regulation of macromolecule biosynthetic process	5	Q969G3,Q9BXP5,Q9HCK8,P49711,O14776,Q9NRZ9,P17096,Q00839,P17028,Q13330,Q86U70
0.0601	2437	11	GO:0031324	BP	negative regulation of cellular metabolic process	4	Q969G3,Q9BXP5,Q9HCK8,P49711,O14776,Q9NRZ9,P17096,Q00839,P17028,Q13330,Q86U70
0.000741	1536	11	GO:0031327	BP	negative regulation of cellular biosynthetic process	5	Q969G3,Q9BXP5,Q9HCK8,P49711,O14776,Q9NRZ9,P17096,Q00839,P17028,Q13330,Q86U70
0.00247	1384	10	GO:2000113	BP	negative regulation of cellular macromolecule biosynthetic process	6	Q969G3,Q9BXP5,Q9HCK8,P49711,O14776,Q9NRZ9,P17096,Q00839,P17028,Q86U70
0.00361	1444	10	GO:0045934	BP	negative regulation of nucleobase-containing compound metabolic process	5	Q969G3,Q9HCK8,P49711,O14776,Q9NRZ9,P17096,Q00839,P17028,Q13330,Q86U70
0.0131	1307	9	GO:0051253	BP	negative regulation of RNA metabolic process	6	Q969G3,Q9HCK8,P49711,O14776,Q9NRZ9,P17096,P17028,Q13330,Q86U70
0.0102	1266	9	GO:1902679	BP	negative regulation of RNA biosynthetic process	7	Q969G3,Q9HCK8,P49711,O14776,Q9NRZ9,P17096,P17028,Q13330,Q86U70
0.00918	1250	9	GO:1903507	BP	negative regulation of nucleic acid-templated transcription	8	Q969G3,Q9HCK8,P49711,O14776,Q9NRZ9,P17096,P17028,Q13330,Q86U70
0.0586	1206	8	GO:0045892	BP	negative regulation of transcription, DNA-templated	9	Q969G3,Q9HCK8,P49711,O14776,Q9NRZ9,P17096,P17028,Q86U70
1	750	3	GO:0000122	BP	negative regulation of transcription from RNA polymerase II promoter	10	Q9HCK8,P49711,O14776
1	118	2	GO:0006342	BP	chromatin silencing	10	Q9NRZ9,P17096
1	18	1	GO:0006346	BP	methylation-dependent chromatin silencing	11	Q9NRZ9
1	17	1	GO:0031935	BP	regulation of chromatin silencing	11	P17096
1	9	1	GO:0031936	BP	negative regulation of chromatin silencing	11	P17096
1	111	1	GO:0051053	BP	negative regulation of DNA metabolic process	6	Q00839
1	55	1	GO:0008156	BP	negative regulation of DNA replication	7	Q00839
1	26	1	GO:0032205	BP	negative regulation of telomere maintenance	7	Q00839
1	17	1	GO:1904357	BP	negative regulation of telomere maintenance via telomere lengthening	8	Q00839
1	12	1	GO:0032211	BP	negative regulation of telomere maintenance via telomerase	9	Q00839
1	137	1	GO:0034249	BP	negative regulation of cellular amide metabolic process	5	Q9BXP5
1	1057	1	GO:0032269	BP	negative regulation of cellular protein metabolic process	5	Q9BXP5
1	131	1	GO:0017148	BP	negative regulation of translation	6	Q9BXP5
1	44	1	GO:0035195	BP	gene silencing by miRNA	7	Q9BXP5
1	24	1	GO:0035196	BP	production of miRNAs involved in gene silencing by miRNA	8	Q9BXP5
1	9	1	GO:0031053	BP	primary miRNA processing	9	Q9BXP5
1	374	1	GO:0002683	BP	negative regulation of immune system process	3	Q86U70
1	132	1	GO:1903707	BP	negative regulation of hemopoiesis	4	Q86U70
1	86	1	GO:0045638	BP	negative regulation of myeloid cell differentiation	5	Q86U70
1	7	1	GO:0045647	BP	negative regulation of erythrocyte differentiation	6	Q86U70
1	1219	3	GO:0023057	BP	negative regulation of signaling	3	Q9HCK8,Q9NRZ9,P02545
1	1105	3	GO:0009968	BP	negative regulation of signal transduction	4	Q9HCK8,Q9NRZ9,P02545
1	452	1	GO:1902532	BP	negative regulation of intracellular signal transduction	5	Q9NRZ9
1	191	1	GO:0030178	BP	negative regulation of Wnt signaling pathway	5	Q9HCK8
1	161	1	GO:0090090	BP	negative regulation of canonical Wnt signaling pathway	6	Q9HCK8
1	207	2	GO:2001234	BP	negative regulation of apoptotic signaling pathway	5	Q9NRZ9,P02545
1	95	1	GO:2001237	BP	negative regulation of extrinsic apoptotic signaling pathway	6	P02545
1	97	1	GO:2001243	BP	negative regulation of intrinsic apoptotic signaling pathway	6	Q9NRZ9
1	18	1	GO:0090201	BP	negative regulation of release of cytochrome c from mitochondria	6	P02545
2.6e-29	18167	61	GO:0005575	CC	cellular_component	1	P51948,P04181,Q969G3,Q15054,Q9BXP5,Q92945,Q9ULW0,Q9P2N5,Q6P6C2,O00541,Q9HCK8,Q9NV56,O43148,P49711,P56270,Q02218,P49005,Q9Y657,Q99567,Q96AG4,Q9H6F5,O14776,P52298,Q15651,Q9NRZ9,P54278,P35269,P35658,Q8NBJ7,O60832,Q9NZ63,Q09161,P17096,Q9NWH9,Q9NZM1,O00622,Q8WVV9,Q9P016,P25705,O14979,Q00839,Q4VC31,P02545,O15042,Q9BZZ5,Q15072,Q2NL82,Q9BTL3,P17028,P18754,P34897,P52292,Q13330,Q9BUI4,P13984,Q86U38,O75717,…
1	633	4	GO:0099512	CC	supramolecular fiber	2	Q9ULW0,P02545,Q13330,Q9BW19
1	633	4	GO:0099513	CC	polymeric cytoskeletal fiber	3	Q9ULW0,P02545,Q13330,Q9BW19
3.34e-28	16203	59	GO:0005623	CC	cell	2	P51948,P04181,Q969G3,Q15054,Q9BXP5,Q92945,Q9ULW0,Q9P2N5,Q6P6C2,O00541,Q9HCK8,Q9NV56,O43148,P49711,P56270,Q02218,P49005,Q9Y657,Q99567,Q96AG4,Q9H6F5,O14776,P52298,Q15651,Q9NRZ9,P54278,P35269,P35658,Q8NBJ7,O60832,Q9NZ63,Q09161,P17096,Q9NWH9,Q9NZM1,Q8WVV9,Q9P016,P25705,O14979,Q00839,Q4VC31,P02545,O15042,Q9BZZ5,Q15072,Q2NL82,Q9BTL3,P17028,P18754,P34897,P52292,Q13330,Q9BUI4,P13984,O75717,Q86U70,Q1KMD3,…
1	401	1	GO:0031012	CC	extracellular matrix	2	O00622
0.248	16	2	GO:0019012	CC	virion	2	Q8WVV9,O14979
1	1146	3	GO:0030054	CC	cell junction	2	P35269,P35658,P17096
1	481	2	GO:0070161	CC	anchoring junction	3	P35658,P17096
1	463	2	GO:0005912	CC	adherens junction	4	P35658,P17096
1	392	2	GO:0030055	CC	cell-substrate junction	3	P35658,P17096
1	388	2	GO:0005924	CC	cell-substrate adherens junction	4	P35658,P17096
1	383	2	GO:0005925	CC	focal adhesion	5	P35658,P17096
6.3e-15	4503	30	GO:0032991	CC	macromolecular complex	2	P51948,Q969G3,Q15054,Q92945,O00541,Q9HCK8,Q9NV56,O43148,Q02218,P52298,Q15651,Q9NRZ9,P54278,P35269,O60832,Q09161,P17096,Q8WVV9,P25705,O14979,Q00839,Q9BZZ5,Q9BTL3,P18754,P34897,Q13330,Q9BUI4,P13984,Q86U70,Q9BW19
0.00132	717	8	GO:1990904	CC	ribonucleoprotein complex	3	Q92945,O00541,O60832,Q09161,Q8WVV9,O14979,Q00839,Q9BZZ5
1.37e-08	3793	22	GO:0043234	CC	protein complex	3	P51948,Q969G3,Q15054,O00541,Q9HCK8,Q9NV56,O43148,Q02218,P52298,P54278,P35269,Q09161,P17096,P25705,Q00839,Q9BTL3,P34897,Q13330,Q9BUI4,P13984,Q86U70,Q9BW19
1.93e-06	14	4	GO:0034518	CC	RNA cap binding complex	4	O43148,P52298,Q09161,Q9BTL3
0.00155	1005	9	GO:1902494	CC	catalytic complex	4	P51948,Q15054,Q9HCK8,Q9NV56,Q02218,P35269,Q13330,Q9BUI4,P13984
0.00083	674	8	GO:1990234	CC	transferase complex	5	P51948,Q15054,Q9HCK8,Q9NV56,Q02218,P35269,Q9BUI4,P13984
1	100	1	GO:1902493	CC	acetyltransferase complex	6	Q9NV56
0.00681	223	5	GO:0061695	CC	transferase complex, transferring phosphorus-containing groups	6	P51948,Q15054,P35269,Q9BUI4,P13984
1	75	2	GO:1902911	CC	protein kinase complex	7	P51948,P13984
1	45	2	GO:1902554	CC	serine/threonine protein kinase complex	8	P51948,P13984
1	311	1	GO:0043235	CC	receptor complex	4	O43148
1	42	1	GO:1990391	CC	DNA repair complex	4	P54278
1	68	2	GO:0017053	CC	transcriptional repressor complex	4	Q969G3,Q13330
1	169	1	GO:0032993	CC	protein-DNA complex	3	Q15054
1.05e-45	4250	51	GO:0031974	CC	membrane-enclosed lumen	2	P51948,P04181,Q969G3,Q15054,Q9BXP5,Q92945,Q9ULW0,Q9P2N5,Q6P6C2,O00541,Q9HCK8,Q9NV56,O43148,P49711,Q02218,P49005,Q9Y657,Q99567,Q96AG4,Q9H6F5,O14776,P52298,Q15651,P54278,P35269,P35658,Q8NBJ7,O60832,Q9NZ63,Q09161,P17096,Q9NWH9,Q9P016,P25705,O14979,Q00839,P02545,O15042,Q9BZZ5,Q15072,Q2NL82,P18754,P34897,P52292,Q13330,Q9BUI4,P13984,O75717,Q86U70,Q1KMD3,Q92804
1	45	2	GO:0009295	CC	nucleoid	2	Q96AG4,P34897
1	9259	16	GO:0016020	CC	membrane	2	Q92945,O00541,Q02218,Q96AG4,O60832,Q9NZM1,Q8WVV9,P25705,Q00839,P02545,Q9BZZ5,P18754,P34897,P52292,Q1KMD3,Q9BW19
1	2004	1	GO:0098805	CC	whole membrane	3	Q9NZM1
5.42e-34	12901	59	GO:0043226	CC	organelle	2	P51948,P04181,Q969G3,Q15054,Q9BXP5,Q92945,Q9ULW0,Q9P2N5,Q6P6C2,O00541,Q9HCK8,Q9NV56,O43148,P49711,P56270,Q02218,P49005,Q9Y657,Q99567,Q96AG4,Q9H6F5,O14776,P52298,Q15651,Q9NRZ9,P54278,P35269,P35658,Q8NBJ7,O60832,Q9NZ63,Q09161,P17096,Q9NWH9,Q9NZM1,Q8WVV9,Q9P016,P25705,O14979,Q00839,Q4VC31,P02545,O15042,Q9BZZ5,Q15072,Q2NL82,Q9BTL3,P17028,P18754,P34897,P52292,Q13330,Q9BUI4,P13984,O75717,Q86U70,Q1KMD3,…
1.25e-14	3828	28	GO:0043228	CC	non-membrane-bounded organelle	3	Q969G3,Q15054,Q92945,Q9ULW0,O00541,O43148,P49711,Q9Y657,Q96AG4,Q9H6F5,O14776,Q15651,Q9NRZ9,P54278,O60832,P17096,Q9P016,Q00839,P02545,Q15072,Q2NL82,P18754,P34897,Q13330,P13984,O75717,Q86U70,Q9BW19
1	3681	4	GO:0031982	CC	vesicle	3	Q9NZM1,P25705,O14979,P34897
5.99e-36	11947	59	GO:0043227	CC	membrane-bounded organelle	3	P51948,P04181,Q969G3,Q15054,Q9BXP5,Q92945,Q9ULW0,Q9P2N5,Q6P6C2,O00541,Q9HCK8,Q9NV56,O43148,P49711,P56270,Q02218,P49005,Q9Y657,Q99567,Q96AG4,Q9H6F5,O14776,P52298,Q15651,Q9NRZ9,P54278,P35269,P35658,Q8NBJ7,O60832,Q9NZ63,Q09161,P17096,Q9NWH9,Q9NZM1,Q8WVV9,Q9P016,P25705,O14979,Q00839,Q4VC31,P02545,O15042,Q9BZZ5,Q15072,Q2NL82,Q9BTL3,P17028,P18754,P34897,P52292,Q13330,Q9BUI4,P13984,O75717,Q86U70,Q1KMD3,…
1	3555	4	GO:0031988	CC	membrane-bounded vesicle	4	Q9NZM1,P25705,O14979,P34897
1	4527	5	GO:0005576	CC	extracellular region	2	Q9NZM1,O00622,P25705,O14979,P34897
1	3795	5	GO:0044421	CC	extracellular region part	2	Q9NZM1,O00622,P25705,O14979,P34897
1	2792	4	GO:0043230	CC	extracellular organelle	3	Q9NZM1,P25705,O14979,P34897
1	2779	4	GO:0065010	CC	extracellular membrane-bounded organelle	4	Q9NZM1,P25705,O14979,P34897
1	2792	4	GO:1903561	CC	extracellular vesicle	4	Q9NZM1,P25705,O14979,P34897
1	2779	4	GO:0070062	CC	extracellular exosome	5	Q9NZM1,P25705,O14979,P34897
1	365	1	GO:0005578	CC	proteinaceous extracellular matrix	3	O00622
2.09e-36	8104	54	GO:0044422	CC	organelle part	2	P51948,P04181,Q969G3,Q15054,Q9BXP5,Q92945,Q9ULW0,Q9P2N5,Q6P6C2,O00541,Q9HCK8,Q9NV56,O43148,P49711,Q02218,P49005,Q9Y657,Q99567,Q96AG4,Q9H6F5,O14776,P52298,Q15651,Q9NRZ9,P54278,P35269,P35658,Q8NBJ7,O60832,Q9NZ63,Q09161,P17096,Q9NWH9,Q9NZM1,Q9P016,P25705,O14979,Q00839,P02545,O15042,Q9BZZ5,Q15072,Q2NL82,P18754,P34897,P52292,Q13330,Q9BUI4,P13984,O75717,Q86U70,Q1KMD3,Q9BW19,Q92804
5.39e-46	4194	51	GO:0043233	CC	organelle lumen	3	P51948,P04181,Q969G3,Q15054,Q9BXP5,Q92945,Q9ULW0,Q9P2N5,Q6P6C2,O00541,Q9HCK8,Q9NV56,O43148,P49711,Q02218,P49005,Q9Y657,Q99567,Q96AG4,Q9H6F5,O14776,P52298,Q15651,P54278,P35269,P35658,Q8NBJ7,O60832,Q9NZ63,Q09161,P17096,Q9NWH9,Q9P016,P25705,O14979,Q00839,P02545,O15042,Q9BZZ5,Q15072,Q2NL82,P18754,P34897,P52292,Q13330,Q9BUI4,P13984,O75717,Q86U70,Q1KMD3,Q92804
1	3085	7	GO:0031090	CC	organelle membrane	3	Q02218,Q96AG4,Q9NZM1,P25705,P02545,P18754,P34897
1	2323	1	GO:0098588	CC	bounding membrane of organelle	4	Q96AG4
1	489	1	GO:0012506	CC	vesicle membrane	4	Q9NZM1
0.248	16	2	GO:0044423	CC	virion part	2	Q8WVV9,O14979
0.137	12	2	GO:0019028	CC	viral capsid	3	Q8WVV9,O14979
0.0932	10	2	GO:0019013	CC	viral nucleocapsid	3	Q8WVV9,O14979
2.92e-28	16166	59	GO:0044464	CC	cell part	2	P51948,P04181,Q969G3,Q15054,Q9BXP5,Q92945,Q9ULW0,Q9P2N5,Q6P6C2,O00541,Q9HCK8,Q9NV56,O43148,P49711,P56270,Q02218,P49005,Q9Y657,Q99567,Q96AG4,Q9H6F5,O14776,P52298,Q15651,Q9NRZ9,P54278,P35269,P35658,Q8NBJ7,O60832,Q9NZ63,Q09161,P17096,Q9NWH9,Q9NZM1,Q8WVV9,Q9P016,P25705,O14979,Q00839,Q4VC31,P02545,O15042,Q9BZZ5,Q15072,Q2NL82,Q9BTL3,P17028,P18754,P34897,P52292,Q13330,Q9BUI4,P13984,O75717,Q86U70,Q1KMD3,…
1	1266	3	GO:0097458	CC	neuron part	3	Q969G3,Q92945,Q9ULW0
1	667	2	GO:0036477	CC	somatodendritic compartment	4	Q92945,Q9ULW0
2.98e-05	1115	11	GO:0031975	CC	envelope	3	Q02218,Q99567,Q96AG4,P35658,Q9NZM1,P25705,P02545,P18754,P34897,P52292,Q13330
1	1809	2	GO:0042995	CC	cell projection	3	Q92945,Q9ULW0
1	971	1	GO:0044463	CC	cell projection part	4	Q9ULW0
1	947	2	GO:0043005	CC	neuron projection	4	Q92945,Q9ULW0
1	414	1	GO:0030424	CC	axon	5	Q9ULW0
1	205	1	GO:0033267	CC	axon part	6	Q9ULW0
1	458	1	GO:0030425	CC	dendrite	5	Q92945
1	175	1	GO:0043209	CC	myelin sheath	3	P25705
1	782	1	GO:0009986	CC	cell surface	3	Q00839
1	5062	2	GO:0071944	CC	cell periphery	3	Q9NZM1,P25705
1	501	2	GO:0044297	CC	cell body	3	Q92945,Q9ULW0
1	442	2	GO:0043025	CC	neuronal cell body	4	Q92945,Q9ULW0
1	7	1	GO:0043203	CC	axon hillock	5	Q9ULW0
1	101	1	GO:1990204	CC	oxidoreductase complex	3	Q02218
1	3759	10	GO:0012505	CC	endomembrane system	3	Q99567,Q96AG4,P35658,Q8NBJ7,Q9NZM1,P02545,P18754,P52292,Q13330,Q9BW19
8.6e-32	14067	59	GO:0005622	CC	intracellular	3	P51948,P04181,Q969G3,Q15054,Q9BXP5,Q92945,Q9ULW0,Q9P2N5,Q6P6C2,O00541,Q9HCK8,Q9NV56,O43148,P49711,P56270,Q02218,P49005,Q9Y657,Q99567,Q96AG4,Q9H6F5,O14776,P52298,Q15651,Q9NRZ9,P54278,P35269,P35658,Q8NBJ7,O60832,Q9NZ63,Q09161,P17096,Q9NWH9,Q9NZM1,Q8WVV9,Q9P016,P25705,O14979,Q00839,Q4VC31,P02545,O15042,Q9BZZ5,Q15072,Q2NL82,Q9BTL3,P17028,P18754,P34897,P52292,Q13330,Q9BUI4,P13984,O75717,Q86U70,Q1KMD3,…
1.72e-32	13685	59	GO:0044424	CC	intracellular part	4	P51948,P04181,Q969G3,Q15054,Q9BXP5,Q92945,Q9ULW0,Q9P2N5,Q6P6C2,O00541,Q9HCK8,Q9NV56,O43148,P49711,P56270,Q02218,P49005,Q9Y657,Q99567,Q96AG4,Q9H6F5,O14776,P52298,Q15651,Q9NRZ9,P54278,P35269,P35658,Q8NBJ7,O60832,Q9NZ63,Q09161,P17096,Q9NWH9,Q9NZM1,Q8WVV9,Q9P016,P25705,O14979,Q00839,Q4VC31,P02545,O15042,Q9BZZ5,Q15072,Q2NL82,Q9BTL3,P17028,P18754,P34897,P52292,Q13330,Q9BUI4,P13984,O75717,Q86U70,Q1KMD3,…
1	12	1	GO:0042575	CC	DNA polymerase complex	5	Q15054
1	100	1	GO:0031248	CC	protein acetyltransferase complex	5	Q9NV56
1	82	1	GO:0034708	CC	methyltransferase complex	5	Q9HCK8
0.0147	120	4	GO:0030880	CC	RNA polymerase complex	5	P51948,P35269,Q9BUI4,P13984
0.0137	118	4	GO:0000428	CC	DNA-directed RNA polymerase complex	6	P51948,P35269,Q9BUI4,P13984
1.41e-10	10606	37	GO:0005737	CC	cytoplasm	5	P51948,P04181,Q15054,Q9BXP5,Q92945,Q9ULW0,Q9P2N5,O00541,Q02218,Q99567,Q96AG4,P52298,Q15651,P54278,P35658,Q8NBJ7,O60832,Q9NZ63,Q09161,P17096,Q9NZM1,Q9P016,P25705,O14979,Q00839,Q4VC31,P02545,Q9BZZ5,Q15072,P18754,P34897,P52292,Q13330,Q9BUI4,O75717,Q9BW19,Q92804
0.145	8003	20	GO:0044444	CC	cytoplasmic part	6	P04181,Q15054,Q92945,Q02218,Q99567,Q96AG4,P52298,P35658,Q8NBJ7,Q09161,P17096,Q9NZM1,P25705,Q00839,Q4VC31,P02545,P34897,P52292,Q9BUI4,Q9BW19
1	653	1	GO:0048471	CC	perinuclear region of cytoplasm	7	P02545
1	3291	9	GO:0005829	CC	cytosol	7	Q92945,Q99567,P52298,P35658,Q09161,P17096,P02545,P52292,Q9BUI4
1	6	1	GO:0070937	CC	CRD-mediated mRNA stability complex	7	Q00839
1	11	1	GO:0045239	CC	tricarboxylic acid cycle enzyme complex	7	Q02218
1	10	1	GO:0045240	CC	dihydrolipoyl dehydrogenase complex	8	Q02218
1	6	1	GO:0045252	CC	oxoglutarate dehydrogenase complex	9	Q02218
3.81e-36	11855	59	GO:0043229	CC	intracellular organelle	5	P51948,P04181,Q969G3,Q15054,Q9BXP5,Q92945,Q9ULW0,Q9P2N5,Q6P6C2,O00541,Q9HCK8,Q9NV56,O43148,P49711,P56270,Q02218,P49005,Q9Y657,Q99567,Q96AG4,Q9H6F5,O14776,P52298,Q15651,Q9NRZ9,P54278,P35269,P35658,Q8NBJ7,O60832,Q9NZ63,Q09161,P17096,Q9NWH9,Q9NZM1,Q8WVV9,Q9P016,P25705,O14979,Q00839,Q4VC31,P02545,O15042,Q9BZZ5,Q15072,Q2NL82,Q9BTL3,P17028,P18754,P34897,P52292,Q13330,Q9BUI4,P13984,O75717,Q86U70,Q1KMD3,…
1.25e-14	3828	28	GO:0043232	CC	intracellular non-membrane-bounded organelle	6	Q969G3,Q15054,Q92945,Q9ULW0,O00541,O43148,P49711,Q9Y657,Q96AG4,Q9H6F5,O14776,Q15651,Q9NRZ9,P54278,O60832,P17096,Q9P016,Q00839,P02545,Q15072,Q2NL82,P18754,P34897,Q13330,P13984,O75717,Q86U70,Q9BW19
2.74e-05	848	10	GO:0005694	CC	chromosome	7	Q969G3,Q15054,O00541,P49711,Q15651,Q9NRZ9,P17096,P18754,O75717,Q86U70
1	191	3	GO:0000793	CC	condensed chromosome	8	O00541,P49711,P18754
0.293	1949	9	GO:0005856	CC	cytoskeleton	7	Q9ULW0,Q9Y657,O14776,P54278,P02545,P34897,Q13330,P13984,Q9BW19
1	426	1	GO:0015629	CC	actin cytoskeleton	8	O14776
1	238	1	GO:0045111	CC	intermediate filament cytoskeleton	8	P02545
0.195	1057	7	GO:0015630	CC	microtubule cytoskeleton	8	Q9ULW0,Q9Y657,P54278,P34897,Q13330,P13984,Q9BW19
4.87e-37	7885	54	GO:0044446	CC	intracellular organelle part	6	P51948,P04181,Q969G3,Q15054,Q9BXP5,Q92945,Q9ULW0,Q9P2N5,Q6P6C2,O00541,Q9HCK8,Q9NV56,O43148,P49711,Q02218,P49005,Q9Y657,Q99567,Q96AG4,Q9H6F5,O14776,P52298,Q15651,Q9NRZ9,P54278,P35269,P35658,Q8NBJ7,O60832,Q9NZ63,Q09161,P17096,Q9NWH9,Q9NZM1,Q9P016,P25705,O14979,Q00839,P02545,O15042,Q9BZZ5,Q15072,Q2NL82,P18754,P34897,P52292,Q13330,Q9BUI4,P13984,O75717,Q86U70,Q1KMD3,Q9BW19,Q92804
0.000135	751	9	GO:0044427	CC	chromosomal part	7	Q969G3,Q15054,P49711,Q15651,Q9NRZ9,P17096,P18754,O75717,Q86U70
1	301	3	GO:0098687	CC	chromosomal region	8	P49711,Q9NRZ9,O75717
1	174	3	GO:0000775	CC	chromosome, centromeric region	9	P49711,Q9NRZ9,O75717
1	51	1	GO:0005657	CC	replication fork	8	Q15054
1	20	1	GO:0030894	CC	replisome	9	Q15054
0.0121	442	6	GO:0000785	CC	chromatin	8	Q969G3,Q15651,Q9NRZ9,P17096,P18754,Q86U70
1	71	2	GO:0000792	CC	heterochromatin	9	Q9NRZ9,P17096
1	4	1	GO:0035985	CC	senescence-associated heterochromatin focus	10	P17096
1	18	1	GO:0005721	CC	pericentric heterochromatin	10	Q9NRZ9
1	1418	5	GO:0044430	CC	cytoskeletal part	7	Q9ULW0,Q9Y657,P02545,Q13330,Q9BW19
1	279	3	GO:0005819	CC	spindle	8	Q9ULW0,Q9Y657,Q9BW19
1	612	1	GO:0005815	CC	microtubule organizing center	8	Q9BW19
1	148	1	GO:0005875	CC	microtubule associated complex	8	Q9BW19
1	59	1	GO:0005871	CC	kinesin complex	9	Q9BW19
1	377	3	GO:0005874	CC	microtubule	8	Q9ULW0,Q13330,Q9BW19
1	196	1	GO:0005882	CC	intermediate filament	8	P02545
2.8e-46	4140	51	GO:0070013	CC	intracellular organelle lumen	7	P51948,P04181,Q969G3,Q15054,Q9BXP5,Q92945,Q9ULW0,Q9P2N5,Q6P6C2,O00541,Q9HCK8,Q9NV56,O43148,P49711,Q02218,P49005,Q9Y657,Q99567,Q96AG4,Q9H6F5,O14776,P52298,Q15651,P54278,P35269,P35658,Q8NBJ7,O60832,Q9NZ63,Q09161,P17096,Q9NWH9,Q9P016,P25705,O14979,Q00839,P02545,O15042,Q9BZZ5,Q15072,Q2NL82,P18754,P34897,P52292,Q13330,Q9BUI4,P13984,O75717,Q86U70,Q1KMD3,Q92804
2.82e-05	1109	11	GO:0031967	CC	organelle envelope	7	Q02218,Q99567,Q96AG4,P35658,Q9NZM1,P25705,P02545,P18754,P34897,P52292,Q13330
1	85	1	GO:0031970	CC	organelle envelope lumen	7	P34897
1.52e-38	10791	59	GO:0043231	CC	intracellular membrane-bounded organelle	6	P51948,P04181,Q969G3,Q15054,Q9BXP5,Q92945,Q9ULW0,Q9P2N5,Q6P6C2,O00541,Q9HCK8,Q9NV56,O43148,P49711,P56270,Q02218,P49005,Q9Y657,Q99567,Q96AG4,Q9H6F5,O14776,P52298,Q15651,Q9NRZ9,P54278,P35269,P35658,Q8NBJ7,O60832,Q9NZ63,Q09161,P17096,Q9NWH9,Q9NZM1,Q8WVV9,Q9P016,P25705,O14979,Q00839,Q4VC31,P02545,O15042,Q9BZZ5,Q15072,Q2NL82,Q9BTL3,P17028,P18754,P34897,P52292,Q13330,Q9BUI4,P13984,O75717,Q86U70,Q1KMD3,…
2.55e-40	6842	54	GO:0005634	CC	nucleus	7	P51948,Q969G3,Q15054,Q9BXP5,Q92945,Q9ULW0,Q9P2N5,Q6P6C2,O00541,Q9HCK8,Q9NV56,O43148,P49711,P56270,P49005,Q9Y657,Q99567,Q96AG4,Q9H6F5,O14776,P52298,Q15651,Q9NRZ9,P54278,P35269,P35658,O60832,Q9NZ63,Q09161,P17096,Q9NWH9,Q9NZM1,Q8WVV9,Q9P016,O14979,Q00839,P02545,O15042,Q9BZZ5,Q15072,Q2NL82,Q9BTL3,P17028,P18754,P34897,P52292,Q13330,Q9BUI4,P13984,O75717,Q86U70,Q1KMD3,Q9BW19,Q92804
6.57e-43	3773	48	GO:0044428	CC	nuclear part	8	P51948,Q969G3,Q15054,Q9BXP5,Q92945,Q9ULW0,Q9P2N5,Q6P6C2,O00541,Q9HCK8,Q9NV56,O43148,P49711,P49005,Q9Y657,Q99567,Q96AG4,Q9H6F5,O14776,P52298,Q15651,P54278,P35269,P35658,O60832,Q9NZ63,Q09161,P17096,Q9NWH9,Q9NZM1,Q9P016,O14979,Q00839,P02545,O15042,Q9BZZ5,Q15072,Q2NL82,P18754,P34897,P52292,Q13330,Q9BUI4,P13984,O75717,Q86U70,Q1KMD3,Q92804
0.188	14	2	GO:0032806	CC	carboxy-terminal domain protein kinase complex	9	P51948,P13984
1	72	2	GO:0070603	CC	SWI/SNF superfamily-type complex	9	Q969G3,Q13330
1	15	1	GO:0090545	CC	CHD-type complex	10	Q13330
1	24	1	GO:0090544	CC	BAF-type complex	10	Q969G3
1	12	1	GO:0071564	CC	npBAF complex	11	Q969G3
1	15	1	GO:0016514	CC	SWI/SNF complex	11	Q969G3
1	14	1	GO:0071565	CC	nBAF complex	11	Q969G3
1	6	1	GO:0070552	CC	BRISC complex	9	P34897
1.13e-39	3435	45	GO:0031981	CC	nuclear lumen	9	P51948,Q969G3,Q15054,Q9BXP5,Q92945,Q9ULW0,Q9P2N5,Q6P6C2,O00541,Q9HCK8,Q9NV56,O43148,P49711,P49005,Q9Y657,Q99567,Q9H6F5,O14776,P52298,Q15651,P54278,P35269,P35658,O60832,Q9NZ63,Q09161,P17096,Q9NWH9,Q9P016,O14979,Q00839,P02545,O15042,Q9BZZ5,Q15072,Q2NL82,P18754,P52292,Q13330,Q9BUI4,P13984,O75717,Q86U70,Q1KMD3,Q92804
1.86e-05	410	8	GO:0005635	CC	nuclear envelope	9	Q99567,Q96AG4,P35658,Q9NZM1,P02545,P18754,P52292,Q13330
1	122	1	GO:0034399	CC	nuclear periphery	9	P02545
4.26e-32	2802	38	GO:0005654	CC	nucleoplasm	9	P51948,Q969G3,Q15054,Q9BXP5,Q92945,Q9ULW0,Q9P2N5,Q6P6C2,O00541,Q9HCK8,Q9NV56,O43148,P49711,P49005,Q99567,P52298,Q15651,P54278,P35269,P35658,O60832,Q9NZ63,Q09161,P17096,Q9NWH9,O14979,Q00839,P02545,O15042,Q9BZZ5,P18754,P52292,Q13330,Q9BUI4,P13984,O75717,Q1KMD3,Q92804
1.77e-07	681	11	GO:0044451	CC	nucleoplasm part	10	P51948,Q9P2N5,Q6P6C2,Q9HCK8,Q9NV56,P35269,O60832,P02545,Q13330,Q9BUI4,P13984
0.837	341	4	GO:0016604	CC	nuclear body	11	Q9P2N5,Q6P6C2,O60832,P02545
1	52	1	GO:0015030	CC	Cajal body	12	O60832
1	191	3	GO:0016607	CC	nuclear speck	12	Q9P2N5,Q6P6C2,P02545
1	49	1	GO:0000118	CC	histone deacetylase complex	11	Q13330
1	64	1	GO:0035097	CC	histone methyltransferase complex	11	Q9HCK8
1	28	1	GO:0044665	CC	MLL1/2 complex	12	Q9HCK8
1	28	1	GO:0071339	CC	MLL1 complex	13	Q9HCK8
1	90	1	GO:0000123	CC	histone acetyltransferase complex	11	Q9NV56
1	19	1	GO:1902562	CC	H4 histone acetyltransferase complex	12	Q9NV56
1	19	1	GO:0043189	CC	H4/H2A histone acetyltransferase complex	13	Q9NV56
1	19	1	GO:0035267	CC	NuA4 histone acetyltransferase complex	14	Q9NV56
0.106	70	3	GO:0005643	CC	nuclear pore	9	Q99567,P35658,P52292
1	8	1	GO:0005652	CC	nuclear lamina	9	P02545
1	99	1	GO:0016363	CC	nuclear matrix	9	P02545
2.21e-05	829	10	GO:0005730	CC	nucleolus	9	O00541,O43148,P49711,Q9Y657,Q9H6F5,O14776,O60832,Q9P016,Q15072,Q2NL82
1	60	2	GO:0044452	CC	nucleolar part	10	O00541,O60832
1	281	3	GO:0031965	CC	nuclear membrane	9	Q9NZM1,P02545,P18754
1	4	1	GO:0005638	CC	lamin filament	9	P02545
0.0137	118	4	GO:0055029	CC	nuclear DNA-directed RNA polymerase complex	8	P51948,P35269,Q9BUI4,P13984
1	18	1	GO:0005666	CC	DNA-directed RNA polymerase III complex	9	Q9BUI4
0.271	96	3	GO:0016591	CC	DNA-directed RNA polymerase II, holoenzyme	9	P51948,P35269,P13984
1	20	1	GO:0090568	CC	nuclear transcriptional repressor complex	8	Q13330
1	15	1	GO:0016581	CC	NuRD complex	9	Q13330
1	494	4	GO:0000228	CC	nuclear chromosome	8	Q969G3,Q15054,P18754,Q86U70
1	460	4	GO:0044454	CC	nuclear chromosome part	9	Q969G3,Q15054,P18754,Q86U70
1	86	1	GO:0000794	CC	condensed nuclear chromosome	8	P18754
1	28	1	GO:0043596	CC	nuclear replication fork	8	Q15054
1	17	1	GO:0043601	CC	nuclear replisome	9	Q15054
1	3	1	GO:0043625	CC	delta DNA polymerase complex	10	Q15054
1	291	3	GO:0000790	CC	nuclear chromatin	8	Q969G3,P18754,Q86U70
0.622	1699	8	GO:0005739	CC	mitochondrion	7	P04181,Q15054,Q02218,Q96AG4,Q09161,P25705,Q4VC31,P34897
1	967	5	GO:0044429	CC	mitochondrial part	8	P04181,Q02218,Q96AG4,P25705,P34897
1	148	1	GO:0098798	CC	mitochondrial protein complex	9	P25705
1	720	3	GO:0005740	CC	mitochondrial envelope	9	Q02218,P25705,P34897
0.119	405	5	GO:0005759	CC	mitochondrial matrix	9	P04181,Q02218,Q96AG4,P25705,P34897
1	77	1	GO:0005758	CC	mitochondrial intermembrane space	9	P34897
1	679	3	GO:0031966	CC	mitochondrial membrane	9	Q02218,P25705,P34897
1	45	2	GO:0042645	CC	mitochondrial nucleoid	8	Q96AG4,P34897
1	1623	2	GO:0005783	CC	endoplasmic reticulum	7	Q96AG4,Q8NBJ7
1	1133	2	GO:0044432	CC	endoplasmic reticulum part	8	Q96AG4,Q8NBJ7
1	203	1	GO:0005788	CC	endoplasmic reticulum lumen	9	Q8NBJ7
1	779	1	GO:0005768	CC	endosome	7	Q9BW19
1	298	1	GO:0005769	CC	early endosome	8	Q9BW19
1	1232	1	GO:0031410	CC	cytoplasmic vesicle	6	Q9NZM1
1	556	1	GO:0044433	CC	cytoplasmic vesicle part	7	Q9NZM1
1	1124	1	GO:0016023	CC	cytoplasmic, membrane-bounded vesicle	7	Q9NZM1
1	470	1	GO:0030659	CC	cytoplasmic vesicle membrane	8	Q9NZM1
0.0277	298	5	GO:0005667	CC	transcription factor complex	5	P51948,P35269,P17096,P13984,Q86U70
0.0162	123	4	GO:0044798	CC	nuclear transcription factor complex	6	P51948,P35269,P17096,P13984
0.00604	96	4	GO:0090575	CC	RNA polymerase II transcription factor complex	7	P51948,P35269,P17096,P13984
0.00208	2	2	GO:0005674	CC	transcription factor TFIIF complex	8	P35269,P13984
0.114	11	2	GO:0005675	CC	holo TFIIH complex	8	P51948,P13984
0.00132	717	8	GO:0030529	CC	intracellular ribonucleoprotein complex	5	Q92945,O00541,O60832,Q09161,Q8WVV9,O14979,Q00839,Q9BZZ5
1	20	1	GO:0005732	CC	small nucleolar ribonucleoprotein complex	6	O60832
1	51	1	GO:0030684	CC	preribosome	6	O00541
1	9	1	GO:0030687	CC	preribosome, large subunit precursor	7	O00541
1	24	1	GO:0030686	CC	90S preribosome	7	O00541
1	3	1	GO:0070545	CC	PeBoW complex	8	O00541
1	146	2	GO:0035770	CC	ribonucleoprotein granule	6	Q92945,Q00839
1	139	2	GO:0036464	CC	cytoplasmic ribonucleoprotein granule	7	Q92945,Q00839
1	32	1	GO:0010494	CC	cytoplasmic stress granule	8	Q92945
1	10	1	GO:0005697	CC	telomerase holoenzyme complex	6	O60832
1	4	1	GO:0072588	CC	box H/ACA RNP complex	7	O60832
1	4	1	GO:0090661	CC	box H/ACA telomerase RNP complex	8	O60832
1	4	1	GO:0072589	CC	box H/ACA scaRNP complex	8	O60832
1	4	1	GO:0031429	CC	box H/ACA snoRNP complex	8	O60832
1	168	3	GO:0005681	CC	spliceosomal complex	6	O14979,Q00839,Q9BZZ5
1	88	1	GO:0071013	CC	catalytic step 2 spliceosome	7	Q00839
1	13	1	GO:0032300	CC	mismatch repair complex	5	P54278
1	7	1	GO:0032389	CC	MutLalpha complex	6	P54278
0.00624	3	2	GO:0005846	CC	nuclear cap binding complex	5	P52298,Q09161
9.58e-07	12	4	GO:0005845	CC	mRNA cap binding complex	5	O43148,P52298,Q09161,Q9BTL3
1	551	2	GO:0019866	CC	organelle inner membrane	5	P25705,P34897
1	496	2	GO:0005743	CC	mitochondrial inner membrane	6	P25705,P34897
1	4953	2	GO:0005886	CC	plasma membrane	3	Q9NZM1,P25705
1	967	1	GO:0042175	CC	nuclear outer membrane-endoplasmic reticulum membrane network	3	Q96AG4
1	6915	4	GO:0044425	CC	membrane part	2	Q96AG4,O60832,Q9NZM1,P25705
1	5853	3	GO:0031224	CC	intrinsic component of membrane	3	Q96AG4,O60832,Q9NZM1
1	5741	3	GO:0016021	CC	integral component of membrane	4	Q96AG4,O60832,Q9NZM1
1	981	1	GO:0098796	CC	membrane protein complex	3	P25705
1	48	1	GO:0016469	CC	proton-transporting two-sector ATPase complex	4	P25705
1	22	1	GO:0045259	CC	proton-transporting ATP synthase complex	5	P25705
1	17	1	GO:0033178	CC	proton-transporting two-sector ATPase complex, catalytic domain	4	P25705
1	6	1	GO:0045261	CC	proton-transporting ATP synthase complex, catalytic core F(1)	5	P25705
1	1134	1	GO:0098589	CC	membrane region	3	Q9NZM1
1	276	1	GO:0098857	CC	membrane microdomain	4	Q9NZM1
1	276	1	GO:0045121	CC	membrane raft	5	Q9NZM1
1	187	1	GO:0044455	CC	mitochondrial membrane part	3	P25705
1	118	1	GO:0098800	CC	inner mitochondrial membrane protein complex	4	P25705
1	21	1	GO:0005753	CC	mitochondrial proton-transporting ATP synthase complex	5	P25705
1	2519	1	GO:0044459	CC	plasma membrane part	3	Q9NZM1
1	941	1	GO:0098590	CC	plasma membrane region	4	Q9NZM1
1	79	1	GO:0044853	CC	plasma membrane raft	5	Q9NZM1
1	69	1	GO:0005901	CC	caveola	6	Q9NZM1
1	946	1	GO:0005789	CC	endoplasmic reticulum membrane	3	Q96AG4
6.29e-27	17039	59	GO:0003674	MF	molecular_function	1	P51948,P04181,Q969G3,Q15054,Q9BXP5,Q92945,Q9ULW0,Q9P2N5,Q6P6C2,O00541,Q9HCK8,Q9NV56,O43148,P49711,P56270,Q02218,P49005,Q9Y657,Q99567,Q96AG4,Q9H6F5,O14776,P52298,Q15651,Q9NRZ9,P54278,P35269,P35658,Q8NBJ7,O60832,Q9NZ63,Q09161,P17096,Q9NWH9,Q9NZM1,O00622,Q8WVV9,P25705,O14979,Q00839,P02545,O15042,Q9BZZ5,Q15072,Q2NL82,Q9BTL3,P17028,P18754,P34897,P52292,Q13330,Q9BUI4,P13984,Q86U38,O75717,Q86U70,Q1KMD3,…
1	1251	4	GO:0005215	MF	transporter activity	2	Q99567,P35658,P25705,P52292
1	1057	2	GO:0022892	MF	substrate-specific transporter activity	3	P25705,P52292
1	96	1	GO:0008565	MF	protein transporter activity	4	P52292
1	14	1	GO:0005487	MF	nucleocytoplasmic transporter activity	3	P35658
1	972	1	GO:0022857	MF	transmembrane transporter activity	3	P25705
1	344	1	GO:0022804	MF	active transmembrane transporter activity	4	P25705
1	115	1	GO:0015399	MF	primary active transmembrane transporter activity	5	P25705
1	115	1	GO:0015405	MF	P-P-bond-hydrolysis-driven transmembrane transporter activity	6	P25705
1	888	1	GO:0022891	MF	substrate-specific transmembrane transporter activity	4	P25705
1	815	1	GO:0015075	MF	ion transmembrane transporter activity	5	P25705
1	612	1	GO:0008324	MF	cation transmembrane transporter activity	6	P25705
1	518	1	GO:0022890	MF	inorganic cation transmembrane transporter activity	7	P25705
1	363	1	GO:0015077	MF	monovalent inorganic cation transmembrane transporter activity	8	P25705
1	105	1	GO:0015078	MF	hydrogen ion transmembrane transporter activity	9	P25705
1.31e-29	14275	58	GO:0005488	MF	binding	2	P51948,P04181,Q969G3,Q15054,Q9BXP5,Q92945,Q9ULW0,Q9P2N5,Q6P6C2,O00541,Q9HCK8,Q9NV56,O43148,P49711,P56270,Q02218,P49005,Q9Y657,Q96AG4,Q9H6F5,O14776,P52298,Q15651,Q9NRZ9,P54278,P35269,P35658,Q8NBJ7,O60832,Q9NZ63,Q09161,P17096,Q9NWH9,Q9NZM1,O00622,Q8WVV9,P25705,O14979,Q00839,P02545,O15042,Q9BZZ5,Q15072,Q2NL82,Q9BTL3,P17028,P18754,P34897,P52292,Q13330,Q9BUI4,P13984,Q86U38,O75717,Q86U70,Q1KMD3,Q9BW19,…
0.169	2257	10	GO:0097367	MF	carbohydrate derivative binding	3	Q9ULW0,Q9HCK8,Q9NRZ9,P54278,O00622,P25705,Q00839,Q15072,P13984,Q9BW19
1	200	2	GO:0005539	MF	glycosaminoglycan binding	4	O00622,Q15072
1.12e-09	1412	16	GO:0044877	MF	macromolecular complex binding	3	Q969G3,O00541,Q9HCK8,P49711,P56270,Q15651,Q9NRZ9,P17096,O00622,Q00839,P18754,P34897,Q13330,O75717,Q86U70,Q9BW19
7.76e-11	457	12	GO:0003682	MF	chromatin binding	4	Q969G3,Q9HCK8,P49711,P56270,Q15651,Q9NRZ9,P17096,P18754,P34897,Q13330,O75717,Q86U70
1	90	2	GO:0043021	MF	ribonucleoprotein complex binding	4	O00541,Q00839
1.33e-33	5944	48	GO:1901363	MF	heterocyclic compound binding	3	P04181,Q969G3,Q9BXP5,Q92945,Q9ULW0,Q9P2N5,Q6P6C2,O00541,Q9HCK8,O43148,P49711,P56270,Q02218,P49005,Q96AG4,Q9H6F5,O14776,P52298,Q15651,Q9NRZ9,P54278,P35269,O60832,Q09161,P17096,Q9NWH9,Q8WVV9,P25705,O14979,Q00839,O15042,Q9BZZ5,Q15072,Q2NL82,Q9BTL3,P17028,P18754,P34897,P52292,Q13330,Q9BUI4,P13984,Q86U38,O75717,Q86U70,Q1KMD3,Q9BW19,Q92804
1	234	3	GO:1901681	MF	sulfur compound binding	3	Q02218,O00622,Q15072
2.55e-33	6027	48	GO:0097159	MF	organic cyclic compound binding	3	P04181,Q969G3,Q9BXP5,Q92945,Q9ULW0,Q9P2N5,Q6P6C2,O00541,Q9HCK8,O43148,P49711,P56270,Q02218,P49005,Q96AG4,Q9H6F5,O14776,P52298,Q15651,Q9NRZ9,P54278,P35269,O60832,Q09161,P17096,Q9NWH9,Q8WVV9,P25705,O14979,Q00839,O15042,Q9BZZ5,Q15072,Q2NL82,Q9BTL3,P17028,P18754,P34897,P52292,Q13330,Q9BUI4,P13984,Q86U38,O75717,Q86U70,Q1KMD3,Q9BW19,Q92804
2.48e-06	2381	16	GO:1901265	MF	nucleoside phosphate binding	4	Q9BXP5,Q9ULW0,Q9P2N5,Q9HCK8,P52298,Q9NRZ9,P54278,Q9NWH9,Q8WVV9,P25705,O14979,Q00839,O15042,P13984,Q9BW19,Q92804
5.31e-32	4026	42	GO:0003676	MF	nucleic acid binding	4	Q969G3,Q9BXP5,Q92945,Q9P2N5,Q6P6C2,O00541,Q9HCK8,O43148,P49711,P56270,P49005,Q96AG4,Q9H6F5,O14776,P52298,Q15651,P54278,P35269,O60832,Q09161,P17096,Q9NWH9,Q8WVV9,P25705,O14979,Q00839,O15042,Q9BZZ5,Q15072,Q2NL82,Q9BTL3,P17028,P18754,P52292,Q13330,Q9BUI4,P13984,Q86U38,O75717,Q86U70,Q1KMD3,Q92804
1	799	5	GO:0001067	MF	regulatory region nucleic acid binding	5	P49711,P56270,Q00839,Q13330,Q86U70
3.85e-11	2491	21	GO:0003677	MF	DNA binding	5	Q9BXP5,Q92945,Q9HCK8,P49711,P56270,P49005,Q15651,P54278,P35269,P17096,O14979,Q00839,Q15072,P17028,P18754,Q13330,Q9BUI4,P13984,O75717,Q86U70,Q92804
1	88	1	GO:0003697	MF	single-stranded DNA binding	6	O14979
0.0226	752	7	GO:0003690	MF	double-stranded DNA binding	6	P49711,P56270,P54278,P17096,O14979,Q13330,Q86U70
1	13	1	GO:0030983	MF	mismatched DNA binding	7	P54278
1	5	1	GO:0032135	MF	DNA insertion or deletion binding	8	P54278
1	1	1	GO:0032138	MF	single base insertion or deletion binding	9	P54278
1	1032	6	GO:0043565	MF	sequence-specific DNA binding	6	P49711,P56270,P17096,P17028,Q13330,Q86U70
1	679	5	GO:1990837	MF	sequence-specific double-stranded DNA binding	7	P49711,P56270,P17096,Q13330,Q86U70
1	8	1	GO:0003680	MF	AT DNA binding	8	P17096
0.289	98	3	GO:0043566	MF	structure-specific DNA binding	6	P49711,Q15651,P18754
0.0929	67	3	GO:0031490	MF	chromatin DNA binding	7	P49711,Q15651,P18754
1	1	1	GO:0043035	MF	chromatin insulator sequence binding	8	P49711
1	798	5	GO:0000975	MF	regulatory region DNA binding	6	P49711,P56270,Q00839,Q13330,Q86U70
1	795	5	GO:0044212	MF	transcription regulatory region DNA binding	7	P49711,P56270,Q00839,Q13330,Q86U70
1	83	2	GO:0035326	MF	enhancer binding	8	Q00839,Q86U70
1	156	3	GO:0001047	MF	core promoter binding	8	P56270,Q00839,Q13330
1	355	1	GO:0001159	MF	core promoter proximal region DNA binding	8	P49711
1	573	2	GO:0001012	MF	RNA polymerase II regulatory region DNA binding	8	P49711,P56270
1	647	4	GO:0000976	MF	transcription regulatory region sequence-specific DNA binding	8	P49711,P56270,Q13330,Q86U70
1	568	2	GO:0000977	MF	RNA polymerase II regulatory region sequence-specific DNA binding	9	P49711,P56270
1	68	1	GO:0001158	MF	enhancer sequence-specific DNA binding	9	Q86U70
1	105	2	GO:0001046	MF	core promoter sequence-specific DNA binding	9	P56270,Q13330
1	58	1	GO:0000979	MF	RNA polymerase II core promoter sequence-specific DNA binding	10	P56270
1	353	1	GO:0000987	MF	core promoter proximal region sequence-specific DNA binding	9	P49711
1	334	1	GO:0000978	MF	RNA polymerase II core promoter proximal region sequence-specific DNA binding	10	P49711
2.68e-26	1598	29	GO:0003723	MF	RNA binding	5	Q969G3,Q9BXP5,Q92945,Q9P2N5,Q6P6C2,O00541,O43148,P56270,Q96AG4,Q9H6F5,O14776,P52298,P35269,O60832,Q09161,Q9NWH9,Q8WVV9,P25705,O14979,Q00839,O15042,Q9BZZ5,Q2NL82,Q9BTL3,P52292,Q86U38,O75717,Q1KMD3,Q92804
1	34	1	GO:0017069	MF	snRNA binding	6	P52298
0.188	14	2	GO:0070034	MF	telomerase RNA binding	6	O60832,Q00839
3.45e-25	1179	26	GO:0044822	MF	poly(A) RNA binding	6	Q9BXP5,Q92945,Q9P2N5,Q6P6C2,O00541,P56270,Q96AG4,Q9H6F5,O14776,P52298,P35269,O60832,Q09161,Q9NWH9,Q8WVV9,P25705,O14979,Q00839,O15042,Q9BZZ5,Q2NL82,Q9BTL3,P52292,Q86U38,Q1KMD3,Q92804
1	159	3	GO:0003729	MF	mRNA binding	7	Q92945,P52298,Q8WVV9
1	49	1	GO:0003730	MF	mRNA 3'-UTR binding	8	Q92945
0.161	13	2	GO:0000339	MF	RNA cap binding	6	P52298,Q09161
1	4	1	GO:0000340	MF	RNA 7-methylguanosine cap binding	7	P52298
1	62	2	GO:0003727	MF	single-stranded RNA binding	6	O14979,Q00839
0.281	17	2	GO:0070717	MF	poly-purine tract binding	7	O14979,Q00839
0.0208	5	2	GO:0034046	MF	poly(G) binding	8	O14979,Q00839
1	13	1	GO:0008143	MF	poly(A) binding	8	O14979
1	24	1	GO:0030515	MF	snoRNA binding	6	O60832
1	4	1	GO:0034513	MF	box H/ACA snoRNA binding	7	O60832
5.25e-23	10729	49	GO:0005515	MF	protein binding	3	P51948,P04181,Q969G3,Q15054,Q9BXP5,Q9ULW0,O00541,Q9HCK8,Q9NV56,O43148,P49711,P56270,Q02218,P49005,Q9Y657,Q9H6F5,O14776,P52298,Q15651,Q9NRZ9,P54278,P35269,P35658,Q8NBJ7,O60832,Q9NZ63,Q09161,P17096,Q9NZM1,O00622,Q8WVV9,P25705,O14979,Q00839,P02545,O15042,Q9BZZ5,Q9BTL3,P17028,P18754,P34897,P52292,Q13330,Q9BUI4,P13984,O75717,Q86U70,Q9BW19,Q92804
1	1183	2	GO:0046983	MF	protein dimerization activity	4	Q8NBJ7,Q86U70
1	19	1	GO:0070064	MF	proline-rich region binding	4	O14776
1	81	1	GO:0008013	MF	beta-catenin binding	4	Q9HCK8
1	2	1	GO:0061676	MF	importin-alpha family protein binding	4	Q9ULW0
1	91	1	GO:0031072	MF	heat shock protein binding	4	Q02218
0.0367	538	6	GO:0008134	MF	transcription factor binding	4	O14776,Q15651,P35269,P17096,Q13330,Q86U70
0.344	104	3	GO:0001085	MF	RNA polymerase II transcription factor binding	5	O14776,Q13330,Q86U70
1	59	1	GO:0033613	MF	activating transcription factor binding	5	Q86U70
1	37	1	GO:0001102	MF	RNA polymerase II activating transcription factor binding	6	Q86U70
1	59	2	GO:0070491	MF	repressing transcription factor binding	5	O14776,Q13330
0.774	28	2	GO:0001103	MF	RNA polymerase II repressing transcription factor binding	6	O14776,Q13330
1	1491	5	GO:0005102	MF	receptor binding	4	Q969G3,Q15651,P17096,O00622,P25705
1	33	1	GO:0042287	MF	MHC protein binding	5	P25705
1	20	1	GO:0042288	MF	MHC class I protein binding	6	P25705
1	177	2	GO:0051427	MF	hormone receptor binding	5	Q15651,P17096
1	156	2	GO:0035257	MF	nuclear hormone receptor binding	6	Q15651,P17096
1	30	1	GO:0046966	MF	thyroid hormone receptor binding	7	Q15651
1	51	1	GO:0042974	MF	retinoic acid receptor binding	7	P17096
1	19	1	GO:0046965	MF	retinoid X receptor binding	8	P17096
1	14	1	GO:0042975	MF	peroxisome proliferator activated receptor binding	5	P17096
1	23	1	GO:0016922	MF	ligand-dependent nuclear receptor binding	5	Q969G3
1	69	1	GO:0002039	MF	p53 binding	4	Q9HCK8
1	1724	6	GO:0019899	MF	enzyme binding	4	Q9ULW0,P17096,P02545,P52292,O75717,Q86U70
1	168	1	GO:0019902	MF	phosphatase binding	5	P02545
1	125	1	GO:0019903	MF	protein phosphatase binding	6	P02545
1	22	1	GO:0008157	MF	protein phosphatase 1 binding	7	P02545
1	107	1	GO:0042826	MF	histone deacetylase binding	5	P52292
1	610	1	GO:0019900	MF	kinase binding	5	Q9ULW0
1	543	1	GO:0019901	MF	protein kinase binding	6	Q9ULW0
1	32	1	GO:0070063	MF	RNA polymerase binding	5	O75717
1	1222	4	GO:0042802	MF	identical protein binding	4	P04181,Q8NBJ7,P34897,Q86U70
1	726	2	GO:0042803	MF	protein homodimerization activity	5	Q8NBJ7,Q86U70
1	644	2	GO:0019904	MF	protein domain specific binding	4	Q9HCK8,Q86U70
1	8	1	GO:0030274	MF	LIM domain binding	5	Q86U70
1	13	1	GO:0070016	MF	armadillo repeat domain binding	5	Q9HCK8
1	187	1	GO:0050839	MF	cell adhesion molecule binding	4	O00622
1	119	2	GO:0019838	MF	growth factor binding	4	O00622,Q9BZZ5
1	23	1	GO:0017134	MF	fibroblast growth factor binding	5	Q9BZZ5
1	24	1	GO:0005520	MF	insulin-like growth factor binding	5	O00622
1	46	1	GO:0043621	MF	protein self-association	4	Q86U70
1	820	1	GO:0008092	MF	cytoskeletal protein binding	4	Q9BW19
1	278	1	GO:0015631	MF	tubulin binding	5	Q9BW19
1	178	3	GO:0042393	MF	histone binding	4	Q9HCK8,Q9Y657,P18754
1	52	2	GO:0035064	MF	methylated histone binding	5	Q9HCK8,Q9Y657
1	103	2	GO:0047485	MF	protein N-terminus binding	4	P51948,Q969G3
1	81	1	GO:0051087	MF	chaperone binding	4	Q02218
1	910	4	GO:0032403	MF	protein complex binding	4	Q15651,O00622,P18754,Q9BW19
0.774	28	2	GO:0031491	MF	nucleosome binding	5	Q15651,P18754
0.188	14	2	GO:0031492	MF	nucleosomal DNA binding	6	Q15651,P18754
1	108	1	GO:0005178	MF	integrin binding	5	O00622
1	199	1	GO:0008017	MF	microtubule binding	5	Q9BW19
1	637	1	GO:0008289	MF	lipid binding	3	Q9NZM1
1	269	3	GO:0048037	MF	cofactor binding	3	P04181,Q02218,P34897
1	191	1	GO:0050662	MF	coenzyme binding	4	Q02218
2.28e-05	6148	23	GO:0043167	MF	ion binding	3	P51948,P04181,Q9ULW0,Q9P2N5,Q6P6C2,Q9HCK8,P49711,P56270,Q02218,Q9NRZ9,P54278,Q8NBJ7,Q9NZM1,O00622,P25705,Q00839,Q15072,P17028,P34897,Q13330,P13984,Q9BW19,Q92804
1	4214	11	GO:0043169	MF	cation binding	4	P51948,Q9P2N5,Q6P6C2,P49711,P56270,Q02218,Q8NBJ7,Q15072,P17028,Q13330,Q92804
1	4140	11	GO:0046872	MF	metal ion binding	5	P51948,Q9P2N5,Q6P6C2,P49711,P56270,Q02218,Q8NBJ7,Q15072,P17028,Q13330,Q92804
1	1445	6	GO:0046914	MF	transition metal ion binding	6	P51948,P49711,Q15072,P17028,Q13330,Q92804
1	1194	6	GO:0008270	MF	zinc ion binding	7	P51948,P49711,Q15072,P17028,Q13330,Q92804
0.000693	2674	14	GO:0043168	MF	anion binding	4	P04181,Q9ULW0,Q9HCK8,Q02218,Q9NRZ9,P54278,Q9NZM1,O00622,P25705,Q00839,Q15072,P34897,P13984,Q9BW19
1	340	1	GO:0005543	MF	phospholipid binding	5	Q9NZM1
1	155	2	GO:0008201	MF	heparin binding	5	O00622,Q15072
1	54	2	GO:0030170	MF	pyridoxal phosphate binding	5	P04181,P34897
1	1844	8	GO:0035639	MF	purine ribonucleoside triphosphate binding	5	Q9ULW0,Q9HCK8,Q9NRZ9,P54278,P25705,Q00839,P13984,Q9BW19
1	52	1	GO:0050840	MF	extracellular matrix binding	3	O00622
1	266	2	GO:0033218	MF	amide binding	3	P35658,P52292
1	242	2	GO:0042277	MF	peptide binding	4	P35658,P52292
1	40	2	GO:0005048	MF	signal sequence binding	5	P35658,P52292
0.475	22	2	GO:0008139	MF	nuclear localization sequence binding	6	P35658,P52292
1.86e-07	2686	18	GO:0036094	MF	small molecule binding	3	Q9BXP5,Q9ULW0,Q9P2N5,Q9HCK8,Q02218,P52298,Q9NRZ9,P54278,Q9NWH9,Q8WVV9,P25705,O14979,Q00839,O15042,P34897,P13984,Q9BW19,Q92804
1	196	1	GO:0043177	MF	organic acid binding	4	P34897
1	195	1	GO:0031406	MF	carboxylic acid binding	5	P34897
1	100	1	GO:0016597	MF	amino acid binding	6	P34897
1	79	1	GO:0019842	MF	vitamin binding	4	Q02218
1	5	1	GO:0030976	MF	thiamine pyrophosphate binding	5	Q02218
2.46e-06	2380	16	GO:0000166	MF	nucleotide binding	4	Q9BXP5,Q9ULW0,Q9P2N5,Q9HCK8,P52298,Q9NRZ9,P54278,Q9NWH9,Q8WVV9,P25705,O14979,Q00839,O15042,P13984,Q9BW19,Q92804
1	1902	8	GO:0032553	MF	ribonucleotide binding	5	Q9ULW0,Q9HCK8,Q9NRZ9,P54278,P25705,Q00839,P13984,Q9BW19
1	1895	8	GO:0017076	MF	purine nucleotide binding	5	Q9ULW0,Q9HCK8,Q9NRZ9,P54278,P25705,Q00839,P13984,Q9BW19
1	1886	8	GO:0032555	MF	purine ribonucleotide binding	6	Q9ULW0,Q9HCK8,Q9NRZ9,P54278,P25705,Q00839,P13984,Q9BW19
1	402	1	GO:0019001	MF	guanyl nucleotide binding	6	Q9ULW0
1	401	1	GO:0032561	MF	guanyl ribonucleotide binding	7	Q9ULW0
0.321	1540	8	GO:0030554	MF	adenyl nucleotide binding	6	Q9ULW0,Q9HCK8,Q9NRZ9,P54278,P25705,Q00839,P13984,Q9BW19
0.311	1533	8	GO:0032559	MF	adenyl ribonucleotide binding	7	Q9ULW0,Q9HCK8,Q9NRZ9,P54278,P25705,Q00839,P13984,Q9BW19
1	1864	8	GO:0001882	MF	nucleoside binding	4	Q9ULW0,Q9HCK8,Q9NRZ9,P54278,P25705,Q00839,P13984,Q9BW19
1	1857	8	GO:0032549	MF	ribonucleoside binding	5	Q9ULW0,Q9HCK8,Q9NRZ9,P54278,P25705,Q00839,P13984,Q9BW19
1	1857	8	GO:0001883	MF	purine nucleoside binding	5	Q9ULW0,Q9HCK8,Q9NRZ9,P54278,P25705,Q00839,P13984,Q9BW19
1	1854	8	GO:0032550	MF	purine ribonucleoside binding	6	Q9ULW0,Q9HCK8,Q9NRZ9,P54278,P25705,Q00839,P13984,Q9BW19
0.263	1496	8	GO:0005524	MF	ATP binding	7	Q9ULW0,Q9HCK8,Q9NRZ9,P54278,P25705,Q00839,P13984,Q9BW19
1	382	1	GO:0005525	MF	GTP binding	7	Q9ULW0
0.000292	587	8	GO:0000988	MF	transcription factor activity, protein binding	2	Q969G3,P49711,O14776,P35269,P17096,Q13330,P13984,Q86U70
1	2	1	GO:0000990	MF	transcription factor activity, core RNA polymerase binding	3	P13984
1	1	1	GO:0000991	MF	transcription factor activity, core RNA polymerase II binding	4	P13984
0.00436	584	7	GO:0000989	MF	transcription factor activity, transcription factor binding	3	Q969G3,P49711,O14776,P35269,P17096,Q13330,Q86U70
0.00263	541	7	GO:0003712	MF	transcription cofactor activity	4	Q969G3,P49711,O14776,P35269,P17096,Q13330,Q86U70
0.16	221	4	GO:0003714	MF	transcription corepressor activity	5	P49711,O14776,Q13330,Q86U70
0.0277	298	5	GO:0003713	MF	transcription coactivator activity	5	Q969G3,O14776,P35269,P17096,Q13330
1	54	1	GO:0030374	MF	ligand-dependent nuclear receptor transcription coactivator activity	6	P17096
1	133	1	GO:0001076	MF	transcription factor activity, RNA polymerase II transcription factor binding	4	O14776
1	83	1	GO:0001191	MF	transcriptional repressor activity, RNA polymerase II transcription factor binding	5	O14776
1	89	1	GO:0001104	MF	RNA polymerase II transcription cofactor activity	5	O14776
1	25	1	GO:0001106	MF	RNA polymerase II transcription corepressor activity	6	O14776
1	1259	2	GO:0098772	MF	molecular function regulator	2	P35269,P18754
1	191	1	GO:0005085	MF	guanyl-nucleotide exchange factor activity	3	P18754
1	126	1	GO:0005088	MF	Ras guanyl-nucleotide exchange factor activity	4	P18754
1	5	1	GO:0005087	MF	Ran guanyl-nucleotide exchange factor activity	5	P18754
1	956	1	GO:0030234	MF	enzyme regulator activity	3	P35269
1	92	1	GO:0019208	MF	phosphatase regulator activity	4	P35269
1	458	1	GO:0008047	MF	enzyme activator activity	4	P35269
1	11	1	GO:0019211	MF	phosphatase activator activity	5	P35269
1	1180	6	GO:0001071	MF	nucleic acid binding transcription factor activity	2	P49711,P56270,P17096,Q15072,P17028,Q13330
1	1180	6	GO:0003700	MF	transcription factor activity, sequence-specific DNA binding	3	P49711,P56270,P17096,Q15072,P17028,Q13330
1	623	3	GO:0000981	MF	RNA polymerase II transcription factor activity, sequence-specific DNA binding	4	P49711,P56270,P17096
1	332	1	GO:0000982	MF	transcription factor activity, RNA polymerase II core promoter proximal region sequence-specific binding	5	P49711
1	326	2	GO:0001228	MF	transcriptional activator activity, RNA polymerase II transcription regulatory region sequence-specific binding	5	P49711,P17096
1	98	1	GO:0003705	MF	transcription factor activity, RNA polymerase II distal enhancer sequence-specific binding	5	P17096
1	29	1	GO:0001205	MF	transcriptional activator activity, RNA polymerase II distal enhancer sequence-specific binding	6	P17096
1	166	1	GO:0001227	MF	transcriptional repressor activity, RNA polymerase II transcription regulatory region sequence-specific binding	5	P49711
1	105	1	GO:0001078	MF	transcriptional repressor activity, RNA polymerase II core promoter proximal region sequence-specific binding	6	P49711
0.0111	5528	18	GO:0003824	MF	catalytic activity	2	P04181,Q969G3,Q15054,Q6P6C2,Q9HCK8,O43148,Q02218,P49005,Q9NRZ9,P54278,P35269,O60832,P17096,P25705,P34897,Q9BUI4,P13984,Q9BW19
1	2403	7	GO:0016787	MF	hydrolase activity	3	Q9HCK8,Q9NRZ9,P54278,P17096,P25705,P13984,Q9BW19
0.277	776	6	GO:0016817	MF	hydrolase activity, acting on acid anhydrides	4	Q9HCK8,Q9NRZ9,P54278,P25705,P13984,Q9BW19
0.272	773	6	GO:0016818	MF	hydrolase activity, acting on acid anhydrides, in phosphorus-containing anhydrides	5	Q9HCK8,Q9NRZ9,P54278,P25705,P13984,Q9BW19
0.266	770	6	GO:0016462	MF	pyrophosphatase activity	6	Q9HCK8,Q9NRZ9,P54278,P25705,P13984,Q9BW19
0.196	728	6	GO:0017111	MF	nucleoside-triphosphatase activity	7	Q9HCK8,Q9NRZ9,P54278,P25705,P13984,Q9BW19
1	402	4	GO:0016887	MF	ATPase activity	8	Q9HCK8,P54278,P25705,Q9BW19
1	291	2	GO:0042623	MF	ATPase activity, coupled	9	Q9HCK8,P25705
1	61	1	GO:0008094	MF	DNA-dependent ATPase activity	10	Q9HCK8
1	120	1	GO:0043492	MF	ATPase activity, coupled to movement of substances	10	P25705
0.895	144	3	GO:0004386	MF	helicase activity	8	Q9HCK8,Q9NRZ9,P13984
1	45	1	GO:0003678	MF	DNA helicase activity	9	Q9HCK8
1	137	1	GO:0003774	MF	motor activity	8	Q9BW19
1	80	1	GO:0003777	MF	microtubule motor activity	9	Q9BW19
1	109	1	GO:0016820	MF	hydrolase activity, acting on acid anhydrides, catalyzing transmembrane movement of substances	5	P25705
1	106	1	GO:0042626	MF	ATPase activity, coupled to transmembrane movement of substances	6	P25705
1	59	1	GO:0042625	MF	ATPase coupled ion transmembrane transporter activity	7	P25705
1	25	1	GO:0044769	MF	ATPase activity, coupled to transmembrane movement of ions, rotational mechanism	8	P25705
1	58	1	GO:0019829	MF	cation-transporting ATPase activity	8	P25705
1	27	1	GO:0036442	MF	hydrogen-exporting ATPase activity	9	P25705
1	23	1	GO:0046961	MF	proton-transporting ATPase activity, rotational mechanism	10	P25705
1	11	1	GO:0046933	MF	proton-transporting ATP synthase activity, rotational mechanism	9	P25705
1	703	2	GO:0016788	MF	hydrolase activity, acting on ester bonds	4	P54278,P17096
1	184	2	GO:0004518	MF	nuclease activity	5	P54278,P17096
1	57	1	GO:0004536	MF	deoxyribonuclease activity	6	P17096
1	112	2	GO:0004519	MF	endonuclease activity	6	P54278,P17096
1	40	1	GO:0004520	MF	endodeoxyribonuclease activity	7	P17096
1	2126	8	GO:0016740	MF	transferase activity	3	P04181,Q969G3,Q15054,O43148,P49005,O60832,P34897,Q9BUI4
1	217	2	GO:0016741	MF	transferase activity, transferring one-carbon groups	4	O43148,P34897
1	8	1	GO:0016742	MF	hydroxymethyl-, formyl- and related transferase activity	5	P34897
1	2	1	GO:0004372	MF	glycine hydroxymethyltransferase activity	6	P34897
1	208	1	GO:0008168	MF	methyltransferase activity	5	O43148
1	75	1	GO:0008170	MF	N-methyltransferase activity	6	O43148
1	46	1	GO:0008173	MF	RNA methyltransferase activity	6	O43148
1	126	1	GO:0008757	MF	S-adenosylmethionine-dependent methyltransferase activity	6	O43148
1	5	1	GO:0008174	MF	mRNA methyltransferase activity	7	O43148
1	1	1	GO:0004482	MF	mRNA (guanine-N7-)-methyltransferase activity	8	O43148
1	24	1	GO:0016769	MF	transferase activity, transferring nitrogenous groups	4	P04181
1	22	1	GO:0008483	MF	transaminase activity	5	P04181
1	1	1	GO:0004587	MF	ornithine-oxo-acid transaminase activity	6	P04181
1	936	4	GO:0016772	MF	transferase activity, transferring phosphorus-containing groups	4	Q15054,P49005,O60832,Q9BUI4
0.0142	119	4	GO:0016779	MF	nucleotidyltransferase activity	5	Q15054,P49005,O60832,Q9BUI4
1	39	1	GO:0034062	MF	RNA polymerase activity	6	Q9BUI4
1	39	1	GO:0003899	MF	DNA-directed RNA polymerase activity	7	Q9BUI4
0.00809	30	3	GO:0034061	MF	DNA polymerase activity	6	Q15054,P49005,O60832
0.719	27	2	GO:0003887	MF	DNA-directed DNA polymerase activity	7	Q15054,P49005
1	3	1	GO:0003964	MF	RNA-directed DNA polymerase activity	7	O60832
1	3	1	GO:0003720	MF	telomerase activity	8	O60832
1	218	1	GO:0016746	MF	transferase activity, transferring acyl groups	4	Q969G3
1	176	1	GO:0016747	MF	transferase activity, transferring acyl groups other than amino-acyl groups	5	Q969G3
1	75	1	GO:0016410	MF	N-acyltransferase activity	6	Q969G3
1	74	1	GO:0016407	MF	acetyltransferase activity	6	Q969G3
1	58	1	GO:0008080	MF	N-acetyltransferase activity	7	Q969G3
1	160	1	GO:0016853	MF	isomerase activity	3	O60832
1	27	1	GO:0016866	MF	intramolecular transferase activity	4	O60832
1	13	1	GO:0009982	MF	pseudouridine synthase activity	5	O60832
1	44	1	GO:0032451	MF	demethylase activity	3	Q6P6C2
1	733	2	GO:0016491	MF	oxidoreductase activity	3	Q6P6C2,Q02218
1	46	1	GO:0016903	MF	oxidoreductase activity, acting on the aldehyde or oxo group of donors	4	Q02218
1	9	1	GO:0016624	MF	oxidoreductase activity, acting on the aldehyde or oxo group of donors, disulfide as acceptor	5	Q02218
1	3	1	GO:0004591	MF	oxoglutarate dehydrogenase (succinyl-transferring) activity	6	Q02218
1	34	1	GO:0016620	MF	oxidoreductase activity, acting on the aldehyde or oxo group of donors, NAD or NADP as acceptor	5	Q02218
1	1	1	GO:0034602	MF	oxoglutarate dehydrogenase (NAD+) activity	6	Q02218
1	87	1	GO:0051213	MF	dioxygenase activity	4	Q6P6C2
1	158	1	GO:0016705	MF	oxidoreductase activity, acting on paired donors, with incorporation or reduction of molecular oxygen	4	Q6P6C2
1	43	1	GO:0016706	MF	oxidoreductase activity, acting on paired donors, with incorporation or reduction of molecular oxygen, 2-oxoglutarate as one donor, and incorporation of one atom each of oxygen into both donors	5	Q6P6C2
1	2	1	GO:0035515	MF	oxidative RNA demethylase activity	4	Q6P6C2
1	176	2	GO:0016829	MF	lyase activity	3	P17096,P34897
1	67	1	GO:0016835	MF	carbon-oxygen lyase activity	4	P17096
1	4	1	GO:0051575	MF	5'-deoxyribose-5-phosphate lyase activity	5	P17096
1	13	1	GO:0003906	MF	DNA-(apurinic or apyrimidinic site) lyase activity	5	P17096
1	50	1	GO:0016830	MF	carbon-carbon lyase activity	4	P34897
1	9	1	GO:0016832	MF	aldehyde-lyase activity	5	P34897
1	2	1	GO:0004793	MF	threonine aldolase activity	6	P34897
1	2	1	GO:0008732	MF	L-allo-threonine aldolase activity	7	P34897
1	732	1	GO:0005198	MF	structural molecule activity	2	P02545

## Sheet: Trn-1
Trn-1 3rd-Z-4% Cargoes (49 Proteins)
p-Value	Total No.	No. of 3rd-Z-4% Cargoes	Term ID	Term Type	Term Name	Term Depth	Accession
2.59e-21	16994	46	GO:0008150	BP	biological_process	1	Q9UKD2,Q15717,Q96EP5,Q9NQ88,P35637,P52272,Q86U42,Q9H307,O00567,O60828,P56270,P16930,P41223,O00151,Q9UQE7,Q13895,Q07666,P22626,P09496,P18846,Q9ULA0,P55795,P25325,Q9BQ69,P09651,P30154,Q14103,O00422,O14979,P32754,Q9NRR5,P61326,P30533,P31943,P52597,P51991,Q01780,Q92922,Q13151,Q6P587,Q66PJ3,Q01844,O94992,P36776,Q99729,P62805
1	5739	10	GO:0051179	BP	localization	2	P52272,Q86U42,Q07666,P22626,P09496,P09651,P61326,P30533,P51991,Q01780
0.498	2805	9	GO:0033036	BP	macromolecule localization	3	P52272,Q86U42,Q07666,P22626,P09496,P09651,P61326,P51991,Q01780
1	2445	2	GO:0008104	BP	protein localization	4	P52272,P09496
3.38e-07	195	7	GO:0006403	BP	RNA localization	4	Q86U42,Q07666,P22626,P09651,P61326,P51991,Q01780
1	4711	9	GO:0051234	BP	establishment of localization	3	P52272,Q86U42,Q07666,P22626,P09496,P09651,P61326,P30533,P51991
6.32e-06	163	6	GO:0051236	BP	establishment of RNA localization	4	Q86U42,Q07666,P22626,P09651,P61326,P51991
1	4571	9	GO:0006810	BP	transport	4	P52272,Q86U42,Q07666,P22626,P09496,P09651,P61326,P30533,P51991
1	2637	8	GO:0071702	BP	organic substance transport	5	P52272,Q86U42,Q07666,P22626,P09496,P09651,P61326,P51991
0.069	807	6	GO:0071705	BP	nitrogen compound transport	5	Q86U42,Q07666,P22626,P09651,P61326,P51991
1.79e-05	194	6	GO:0015931	BP	nucleobase-containing compound transport	6	Q86U42,Q07666,P22626,P09651,P61326,P51991
5.87e-06	161	6	GO:0050657	BP	nucleic acid transport	7	Q86U42,Q07666,P22626,P09651,P61326,P51991
5.87e-06	161	6	GO:0050658	BP	RNA transport	8	Q86U42,Q07666,P22626,P09651,P61326,P51991
1	1	1	GO:1990428	BP	miRNA transport	9	P22626
0.000135	135	5	GO:0051028	BP	mRNA transport	9	Q86U42,P22626,P09651,P61326,P51991
1	1400	2	GO:0016192	BP	vesicle-mediated transport	5	P09496,P30533
1	639	2	GO:0006897	BP	endocytosis	6	P09496,P30533
1	301	2	GO:0006898	BP	receptor-mediated endocytosis	7	P09496,P30533
1	55	1	GO:0072583	BP	clathrin-mediated endocytosis	8	P09496
1	2012	2	GO:0045184	BP	establishment of protein localization	4	P52272,P09496
1	1862	2	GO:0015031	BP	protein transport	5	P52272,P09496
1	3044	8	GO:0051641	BP	cellular localization	3	P52272,Q86U42,Q07666,P22626,P09496,P09651,P61326,Q01780
0.114	97	3	GO:0071166	BP	ribonucleoprotein complex localization	4	Q86U42,P22626,P61326
1	1549	3	GO:0070727	BP	cellular macromolecule localization	4	P52272,P09496,Q01780
1	1538	2	GO:0034613	BP	cellular protein localization	5	P52272,P09496
1	884	1	GO:0033365	BP	protein localization to organelle	6	P52272
1	354	1	GO:0034504	BP	protein localization to nucleus	7	P52272
1	11	1	GO:0008298	BP	intracellular mRNA localization	5	Q01780
1	2640	6	GO:0051649	BP	establishment of localization in cell	4	Q86U42,Q07666,P22626,P09496,P09651,P61326
1	1905	6	GO:0046907	BP	intracellular transport	5	Q86U42,Q07666,P22626,P09496,P09651,P61326
0.0454	443	5	GO:0051169	BP	nuclear transport	6	Q86U42,Q07666,P22626,P09651,P61326
1	1257	5	GO:0016482	BP	cytoplasmic transport	6	Q86U42,Q07666,P22626,P09651,P61326
0.043	438	5	GO:0006913	BP	nucleocytoplasmic transport	7	Q86U42,Q07666,P22626,P09651,P61326
0.000287	157	5	GO:0051168	BP	nuclear export	8	Q86U42,Q07666,P22626,P09651,P61326
2.44e-05	96	5	GO:0006405	BP	RNA export from nucleus	9	Q86U42,Q07666,P22626,P09651,P61326
1	281	1	GO:0051170	BP	nuclear import	8	P09651
1	1022	1	GO:0006886	BP	intracellular protein transport	6	P09496
5.52e-11	11489	33	GO:0065007	BP	biological regulation	2	Q15717,Q96EP5,Q9NQ88,P35637,P52272,Q86U42,Q9H307,O60828,P56270,P41223,O00151,Q9UQE7,Q07666,P22626,P09496,P18846,P09651,P30154,Q14103,O00422,O14979,Q9NRR5,P61326,P30533,P31943,P52597,Q01780,Q92922,Q13151,Q01844,O94992,Q99729,P62805
1	3631	6	GO:0065008	BP	regulation of biological quality	3	Q15717,Q86U42,P09651,Q14103,Q13151,P62805
1	1605	2	GO:0042592	BP	homeostatic process	4	P09651,P62805
1	373	2	GO:0060249	BP	anatomical structure homeostasis	5	P09651,P62805
1	2862	5	GO:0065009	BP	regulation of molecular function	3	Q9NQ88,P41223,P30154,P30533,O94992
1	1830	2	GO:0044093	BP	positive regulation of molecular function	4	Q9NQ88,P41223
1	282	1	GO:0051098	BP	regulation of binding	4	P30533
1	168	1	GO:0043393	BP	regulation of protein binding	5	P30533
1	1130	2	GO:0044092	BP	negative regulation of molecular function	4	P30533,O94992
1	128	1	GO:0051100	BP	negative regulation of binding	5	P30533
1	74	1	GO:0032091	BP	negative regulation of protein binding	6	P30533
0.0102	5934	16	GO:0032502	BP	developmental process	2	Q15717,Q96EP5,Q9NQ88,O60828,Q9UQE7,Q13895,P09496,P18846,P25325,P30154,Q14103,Q92922,O94992,P36776,Q99729,P62805
0.0566	5272	14	GO:0048856	BP	anatomical structure development	3	Q15717,Q96EP5,Q9NQ88,O60828,Q13895,P09496,P18846,P25325,P30154,Q14103,Q92922,O94992,Q99729,P62805
1	1807	2	GO:0009888	BP	tissue development	4	Q9NQ88,Q99729
1	1125	1	GO:0060429	BP	epithelium development	5	Q9NQ88
1	170	2	GO:0098727	BP	maintenance of cell number	3	Q15717,Q9UQE7
1	2805	6	GO:0009653	BP	anatomical structure morphogenesis	3	O60828,Q13895,P09496,P30154,Q92922,Q99729
1	1184	1	GO:0048646	BP	anatomical structure formation involved in morphogenesis	3	Q13895
1	6347	10	GO:0023052	BP	signaling	2	P41223,Q9UQE7,Q07666,P09496,P18846,P30154,P30533,Q92922,O94992,P62805
1	1853	1	GO:0040011	BP	locomotion	2	P09496
2.2e-05	13769	29	GO:0044699	BP	single-organism process	2	Q15717,Q96EP5,Q9NQ88,P52272,Q86U42,O60828,P16930,P41223,Q9UQE7,Q13895,Q07666,P22626,P09496,P18846,P25325,Q9BQ69,P09651,P30154,Q14103,O00422,P32754,Q9NRR5,P61326,P30533,Q92922,O94992,P36776,Q99729,P62805
1	2026	3	GO:0016265	BP	death	3	Q9NQ88,P30154,O00422
1	1990	3	GO:0008283	BP	cell proliferation	3	Q96EP5,Q13895,Q07666
1	4182	5	GO:1902578	BP	single-organism localization	3	P52272,Q86U42,P22626,P09496,P61326
1	4002	5	GO:0044765	BP	single-organism transport	4	P52272,Q86U42,P22626,P09496,P61326
1	1742	4	GO:1902582	BP	single-organism intracellular transport	5	Q86U42,P22626,P09496,P61326
0.104	94	3	GO:0071426	BP	ribonucleoprotein complex export from nucleus	6	Q86U42,P22626,P61326
0.069	82	3	GO:0071427	BP	mRNA-containing ribonucleoprotein complex export from nucleus	7	Q86U42,P22626,P61326
1	336	1	GO:0048193	BP	Golgi vesicle transport	6	P09496
1	120	1	GO:0006892	BP	post-Golgi vesicle-mediated transport	7	P09496
1	326	1	GO:0017038	BP	protein import	5	P52272
1	6337	10	GO:0044700	BP	single organism signaling	3	P41223,Q9UQE7,Q07666,P09496,P18846,P30154,P30533,Q92922,O94992,P62805
0.00847	5849	16	GO:0044767	BP	single-organism developmental process	3	Q15717,Q96EP5,Q9NQ88,O60828,Q9UQE7,Q13895,P09496,P18846,P25325,P30154,Q14103,Q92922,O94992,P36776,Q99729,P62805
1	2	1	GO:0043696	BP	dedifferentiation	4	Q14103
1	301	1	GO:0007568	BP	aging	4	P36776
1	762	2	GO:0060322	BP	head development	4	Q13895,Q14103
1	1467	2	GO:0022610	BP	biological adhesion	2	Q9H307,Q13895
1	1461	2	GO:0007155	BP	cell adhesion	3	Q9H307,Q13895
0.000154	8574	22	GO:0050896	BP	response to stimulus	2	Q9NQ88,P35637,P52272,P41223,O00151,Q9UQE7,Q13895,Q07666,P22626,P09496,P18846,P25325,Q9BQ69,P30154,Q14103,Q9NRR5,P30533,Q92922,Q13151,O94992,P36776,P62805
0.207	4445	12	GO:0042221	BP	response to chemical	3	Q9NQ88,P35637,P52272,Q13895,P22626,P09496,P18846,P25325,Q14103,Q92922,Q13151,P36776
1	1087	3	GO:1901698	BP	response to nitrogen compound	4	P22626,Q14103,Q92922
1	97	1	GO:0060359	BP	response to ammonium ion	5	Q14103
1	1660	5	GO:1901700	BP	response to oxygen-containing compound	4	P52272,Q13895,Q14103,Q92922,Q13151
1	332	1	GO:0001101	BP	response to acid chemical	4	Q14103
1	255	1	GO:0009636	BP	response to toxic substance	4	P25325
0.833	3009	9	GO:0010033	BP	response to organic substance	4	P52272,Q13895,P22626,P09496,P18846,Q14103,Q92922,Q13151,P36776
1	175	1	GO:1901654	BP	response to ketone	5	Q14103
1	5	1	GO:1904587	BP	response to glycoprotein	5	P52272
1	952	3	GO:0070848	BP	response to growth factor	5	Q13895,P09496,P18846
1	873	4	GO:0033993	BP	response to lipid	5	P52272,Q13895,Q14103,Q13151
1	862	1	GO:0034097	BP	response to cytokine	5	Q13895
1	119	1	GO:0070555	BP	response to interleukin-1	6	Q13895
1	890	4	GO:0014070	BP	response to organic cyclic compound	5	Q13895,P22626,P18846,Q14103
1	78	1	GO:0043331	BP	response to dsRNA	6	P22626
1	380	1	GO:0097305	BP	response to alcohol	5	Q14103
1	11	1	GO:0045472	BP	response to ether	5	Q14103
1	3	1	GO:0014076	BP	response to fluoxetine	6	Q14103
1	202	1	GO:0009410	BP	response to xenobiotic stimulus	4	Q9NQ88
1	15	1	GO:1902074	BP	response to salt	4	Q14103
0.0961	519	5	GO:0010035	BP	response to inorganic substance	4	Q9NQ88,P35637,P18846,Q14103,P36776
0.0144	349	5	GO:0010038	BP	response to metal ion	5	Q9NQ88,P35637,P18846,Q14103,P36776
1	120	2	GO:0051592	BP	response to calcium ion	6	P35637,Q14103
1	6	1	GO:0010044	BP	response to aluminum ion	6	P36776
0.0718	12	2	GO:0032025	BP	response to cobalt ion	6	Q9NQ88,P18846
1	2	1	GO:1904383	BP	response to sodium phosphate	5	Q14103
1	1747	4	GO:0009719	BP	response to endogenous stimulus	3	Q9NQ88,Q14103,Q92922,P36776
1	1312	3	GO:0071495	BP	cellular response to endogenous stimulus	4	Q9NQ88,Q14103,Q92922
1	1080	3	GO:0009725	BP	response to hormone	4	Q14103,Q92922,P36776
1	450	1	GO:0048545	BP	response to steroid hormone	5	Q14103
1	225	1	GO:0043627	BP	response to estrogen	6	Q14103
1	149	1	GO:0032355	BP	response to estradiol	7	Q14103
1	998	2	GO:0010243	BP	response to organonitrogen compound	4	Q14103,Q92922
1	1	1	GO:1904585	BP	response to putrescine	5	Q14103
1	652	1	GO:1901652	BP	response to peptide	5	Q92922
1	616	1	GO:0043434	BP	response to peptide hormone	6	Q92922
1	463	1	GO:0032868	BP	response to insulin	7	Q92922
1	117	1	GO:0043200	BP	response to amino acid	5	Q14103
1	2	1	GO:1901355	BP	response to rapamycin	5	Q14103
1	1226	4	GO:0009628	BP	response to abiotic stimulus	3	Q9NQ88,O00151,Q14103,P36776
1	334	3	GO:0070482	BP	response to oxygen levels	4	Q9NQ88,O00151,P36776
1	316	3	GO:0036293	BP	response to decreased oxygen levels	5	Q9NQ88,O00151,P36776
1	511	1	GO:0009314	BP	response to radiation	4	Q9NQ88
1	149	1	GO:0010212	BP	response to ionizing radiation	5	Q9NQ88
1	53	1	GO:0010332	BP	response to gamma radiation	6	Q9NQ88
1	48	1	GO:0051602	BP	response to electrical stimulus	4	Q14103
1	4101	10	GO:0006950	BP	response to stress	3	Q9NQ88,O00151,Q9UQE7,P18846,Q9BQ69,Q14103,Q9NRR5,Q13151,P36776,P62805
1	1867	2	GO:0006952	BP	defense response	4	P18846,Q13151
1	656	1	GO:0006954	BP	inflammatory response	5	Q13151
1	32	1	GO:0002931	BP	response to ischemia	4	Q9NQ88
1	401	3	GO:0006979	BP	response to oxidative stress	4	O00151,Q14103,P36776
1	222	1	GO:0000302	BP	response to reactive oxygen species	5	Q14103
1	23	1	GO:0071731	BP	response to nitric oxide	6	Q14103
1	307	3	GO:0001666	BP	response to hypoxia	4	Q9NQ88,O00151,P36776
1	2565	6	GO:0009605	BP	response to external stimulus	3	Q9NQ88,P52272,Q13895,P09496,Q9NRR5,Q13151
1	870	1	GO:0042330	BP	taxis	4	P09496
1	870	1	GO:0006935	BP	chemotaxis	5	P09496
1	552	2	GO:0009991	BP	response to extracellular stimulus	4	Q9NQ88,Q9NRR5
1	522	2	GO:0031667	BP	response to nutrient levels	5	Q9NQ88,Q9NRR5
1	984	4	GO:0009607	BP	response to biotic stimulus	3	Q9NQ88,P52272,Q13895,Q13151
1	947	3	GO:0043207	BP	response to external biotic stimulus	4	P52272,Q13895,Q13151
1	2473	6	GO:0051704	BP	multi-organism process	2	Q96EP5,P52272,Q86U42,Q13895,P09651,Q13151
1	841	2	GO:0044419	BP	interspecies interaction between organisms	3	Q86U42,P09651
1	841	2	GO:0044403	BP	symbiosis, encompassing mutualism through parasitism	4	Q86U42,P09651
1	193	1	GO:0051701	BP	interaction with host	4	Q86U42
1	137	1	GO:0035821	BP	modification of morphology or physiology of other organism	3	Q86U42
1	118	1	GO:0051817	BP	modification of morphology or physiology of other organism involved in symbiotic interaction	4	Q86U42
1	75	1	GO:0044003	BP	modification by symbiont of host morphology or physiology	5	Q86U42
1	947	3	GO:0051707	BP	response to other organism	3	P52272,Q13895,Q13151
1	563	3	GO:0009617	BP	response to bacterium	4	P52272,Q13895,Q13151
1	343	3	GO:0002237	BP	response to molecule of bacterial origin	5	P52272,Q13895,Q13151
1	330	3	GO:0032496	BP	response to lipopolysaccharide	6	P52272,Q13895,Q13151
1	347	1	GO:0048511	BP	rhythmic process	2	Q14103
1	212	1	GO:0007623	BP	circadian rhythm	3	Q14103
0.00482	6327	17	GO:0071840	BP	cellular component organization or biogenesis	2	Q9UKD2,Q9NQ88,O00567,O60828,Q9UQE7,Q13895,P09496,P18846,P09651,P30154,O00422,Q9NRR5,Q01780,Q92922,P36776,Q99729,P62805
0.346	2671	9	GO:0044085	BP	cellular component biogenesis	3	Q9UKD2,O00567,O60828,Q13895,P18846,P30154,Q01780,P36776,P62805
1	1400	4	GO:0070271	BP	protein complex biogenesis	4	P18846,P30154,P36776,P62805
0.0223	382	5	GO:0022613	BP	ribonucleoprotein complex biogenesis	4	Q9UKD2,O00567,O60828,Q13895,Q01780
0.0643	235	4	GO:0042254	BP	ribosome biogenesis	5	Q9UKD2,O00567,Q13895,Q01780
1	49	1	GO:0042274	BP	ribosomal small subunit biogenesis	5	Q13895
9.8e-23	12055	43	GO:0008152	BP	metabolic process	2	Q15717,Q96EP5,Q9NQ88,P35637,P52272,Q86U42,Q9H307,O00567,O60828,P56270,P16930,P41223,O00151,Q9UQE7,Q13895,Q07666,P22626,P18846,Q9ULA0,P55795,P25325,Q9BQ69,P09651,P30154,Q14103,O00422,O14979,P32754,Q9NRR5,P61326,P31943,P52597,P51991,Q01780,Q92922,Q13151,Q6P587,Q66PJ3,Q01844,O94992,P36776,Q99729,P62805
1.11e-23	10482	42	GO:0044238	BP	primary metabolic process	3	Q15717,Q96EP5,Q9NQ88,P35637,P52272,Q86U42,Q9H307,O00567,O60828,P56270,P16930,P41223,O00151,Q9UQE7,Q13895,Q07666,P22626,P18846,Q9ULA0,P55795,P25325,Q9BQ69,P09651,P30154,Q14103,O00422,O14979,P32754,Q9NRR5,P61326,P31943,P52597,P51991,Q01780,Q92922,Q13151,Q66PJ3,Q01844,O94992,P36776,Q99729,P62805
0.0138	2256	10	GO:0009056	BP	catabolic process	3	Q9NQ88,P16930,P25325,Q14103,P32754,Q9NRR5,P61326,Q01780,Q92922,P36776
3.91e-23	10808	42	GO:0071704	BP	organic substance metabolic process	3	Q15717,Q96EP5,Q9NQ88,P35637,P52272,Q86U42,Q9H307,O00567,O60828,P56270,P16930,P41223,O00151,Q9UQE7,Q13895,Q07666,P22626,P18846,Q9ULA0,P55795,P25325,Q9BQ69,P09651,P30154,Q14103,O00422,O14979,P32754,Q9NRR5,P61326,P31943,P52597,P51991,Q01780,Q92922,Q13151,Q66PJ3,Q01844,O94992,P36776,Q99729,P62805
2.7e-21	9286	39	GO:0043170	BP	macromolecule metabolic process	4	Q15717,Q96EP5,Q9NQ88,P35637,P52272,Q86U42,Q9H307,O00567,O60828,P56270,P41223,O00151,Q9UQE7,Q13895,Q07666,P22626,P18846,Q9ULA0,P55795,Q9BQ69,P09651,P30154,Q14103,O00422,O14979,Q9NRR5,P61326,P31943,P52597,P51991,Q01780,Q92922,Q13151,Q66PJ3,Q01844,O94992,P36776,Q99729,P62805
1	4139	7	GO:0043412	BP	macromolecule modification	5	O00567,Q9UQE7,P18846,Q9BQ69,P30154,O94992,P62805
4.59e-21	5430	33	GO:0010467	BP	gene expression	5	Q15717,Q96EP5,Q9NQ88,P35637,P52272,Q86U42,Q9H307,O00567,O60828,P56270,P41223,O00151,Q13895,Q07666,P22626,P18846,P55795,P09651,Q14103,O00422,O14979,P61326,P31943,P52597,P51991,Q01780,Q92922,Q13151,Q66PJ3,Q01844,O94992,Q99729,P62805
0.069	82	3	GO:0006406	BP	mRNA export from nucleus	6	Q86U42,P22626,P61326
1	14	1	GO:0016973	BP	poly(A)+ mRNA export from nucleus	7	Q86U42
0.0345	5770	15	GO:0019538	BP	protein metabolic process	5	Q15717,Q9UQE7,Q07666,P22626,P18846,Q9ULA0,Q9BQ69,P30154,Q14103,Q9NRR5,P61326,Q92922,O94992,P36776,P62805
1	1632	4	GO:0006508	BP	proteolysis	6	Q9ULA0,Q9NRR5,Q92922,P36776
1	3959	6	GO:0036211	BP	protein modification process	6	Q9UQE7,P18846,Q9BQ69,P30154,O94992,P62805
1	559	1	GO:1901615	BP	organic hydroxy compound metabolic process	4	Q9NQ88
1	1381	2	GO:1901135	BP	carbohydrate derivative metabolic process	4	Q9NQ88,Q9BQ69
0.00255	1864	10	GO:1901575	BP	organic substance catabolic process	4	Q9NQ88,P16930,P25325,Q14103,P32754,Q9NRR5,P61326,Q01780,Q92922,P36776
0.594	1199	6	GO:0009057	BP	macromolecule catabolic process	5	Q14103,Q9NRR5,P61326,Q01780,Q92922,P36776
1	827	3	GO:0030163	BP	protein catabolic process	6	Q9NRR5,Q92922,P36776
5.42e-25	6143	37	GO:1901360	BP	organic cyclic compound metabolic process	4	Q96EP5,Q9NQ88,P35637,P52272,Q86U42,Q9H307,O00567,O60828,P56270,P16930,P41223,O00151,Q9UQE7,Q13895,Q07666,P22626,P18846,P55795,Q9BQ69,P09651,Q14103,O00422,O14979,P32754,P61326,P31943,P52597,P51991,Q01780,Q92922,Q13151,Q66PJ3,Q01844,O94992,P36776,Q99729,P62805
0.00392	486	6	GO:1901361	BP	organic cyclic compound catabolic process	5	Q9NQ88,P16930,Q14103,P32754,P61326,Q01780
1	1020	1	GO:0005975	BP	carbohydrate metabolic process	4	Q9NQ88
1	146	1	GO:0016052	BP	carbohydrate catabolic process	5	Q9NQ88
1	5684	10	GO:0044710	BP	single-organism metabolic process	3	Q9NQ88,P16930,Q9UQE7,P22626,P18846,P25325,Q9BQ69,P09651,P32754,P62805
1	58	1	GO:0019748	BP	secondary metabolic process	4	Q9NQ88
1	409	2	GO:1901657	BP	glycosyl compound metabolic process	4	Q9NQ88,Q9BQ69
1	1178	4	GO:0044712	BP	single-organism catabolic process	4	Q9NQ88,P16930,P25325,P32754
1	829	1	GO:0044723	BP	single-organism carbohydrate metabolic process	4	Q9NQ88
1	138	1	GO:0044724	BP	single-organism carbohydrate catabolic process	5	Q9NQ88
1	2701	5	GO:0044281	BP	small molecule metabolic process	4	Q9NQ88,P16930,P25325,Q9BQ69,P32754
1	356	3	GO:0044282	BP	small molecule catabolic process	5	Q9NQ88,P16930,P32754
1	317	1	GO:0005996	BP	monosaccharide metabolic process	5	Q9NQ88
1	61	1	GO:0046365	BP	monosaccharide catabolic process	6	Q9NQ88
1	270	1	GO:0019318	BP	hexose metabolic process	6	Q9NQ88
1	51	1	GO:0019320	BP	hexose catabolic process	7	Q9NQ88
1	232	1	GO:0006006	BP	glucose metabolic process	7	Q9NQ88
1	34	1	GO:0006007	BP	glucose catabolic process	8	Q9NQ88
1	1111	2	GO:0055114	BP	oxidation-reduction process	4	Q9NQ88,P32754
1	69	1	GO:0070988	BP	demethylation	4	P62805
1	367	1	GO:0032259	BP	methylation	3	P62805
1.01e-27	6922	40	GO:0006807	BP	nitrogen compound metabolic process	3	Q15717,Q96EP5,Q9NQ88,P35637,P52272,Q86U42,Q9H307,O00567,O60828,P56270,P16930,P41223,O00151,Q9UQE7,Q13895,Q07666,P22626,P18846,Q9ULA0,P55795,P25325,Q9BQ69,P09651,Q14103,O00422,O14979,P32754,P61326,P31943,P52597,P51991,Q01780,Q92922,Q13151,Q66PJ3,Q01844,O94992,P36776,Q99729,P62805
0.00204	2290	11	GO:1901564	BP	organonitrogen compound metabolic process	4	Q15717,Q9NQ88,P16930,Q07666,P22626,Q9ULA0,P25325,Q9BQ69,Q14103,P32754,P61326
0.34	362	4	GO:1901565	BP	organonitrogen compound catabolic process	5	Q9NQ88,P16930,P25325,P32754
9.24e-09	6390	24	GO:0009058	BP	biosynthetic process	3	Q15717,Q9NQ88,P35637,Q86U42,Q9H307,O60828,P56270,P41223,O00151,Q9UQE7,Q07666,P22626,P18846,P25325,P09651,Q14103,O00422,O14979,P61326,Q92922,Q01844,O94992,Q99729,P62805
6.04e-08	6305	23	GO:1901576	BP	organic substance biosynthetic process	4	Q15717,Q9NQ88,P35637,Q86U42,Q9H307,O60828,P56270,P41223,O00151,Q9UQE7,Q07666,P22626,P18846,P09651,Q14103,O00422,O14979,P61326,Q92922,Q01844,O94992,Q99729,P62805
6.66e-08	4506	20	GO:1901362	BP	organic cyclic compound biosynthetic process	5	Q9NQ88,P35637,Q86U42,Q9H307,O60828,P56270,P41223,O00151,Q07666,P22626,P18846,Q14103,O00422,O14979,P61326,Q92922,Q01844,O94992,Q99729,P62805
1	1439	5	GO:1901566	BP	organonitrogen compound biosynthetic process	5	Q15717,Q07666,P22626,Q14103,P61326
1.57e-09	5283	23	GO:0009059	BP	macromolecule biosynthetic process	5	Q15717,Q9NQ88,P35637,Q86U42,Q9H307,O60828,P56270,P41223,O00151,Q9UQE7,Q07666,P22626,P18846,P09651,Q14103,O00422,O14979,P61326,Q92922,Q01844,O94992,Q99729,P62805
1	1776	2	GO:0044711	BP	single-organism biosynthetic process	4	Q9UQE7,P09651
1	1403	4	GO:0000003	BP	reproduction	2	Q96EP5,Q9UQE7,Q13895,Q92922
8e-20	15371	44	GO:0009987	BP	cellular process	2	Q15717,Q96EP5,Q9NQ88,P35637,P52272,Q86U42,Q9H307,O00567,O60828,P56270,P16930,P41223,O00151,Q9UQE7,Q13895,Q07666,P22626,P09496,P18846,Q9ULA0,P55795,P25325,Q9BQ69,P09651,P30154,Q14103,O00422,O14979,P32754,Q9NRR5,P61326,P30533,P31943,P52597,P51991,Q01780,Q92922,Q13151,Q66PJ3,Q01844,O94992,P36776,Q99729,P62805
1	522	2	GO:0006914	BP	autophagy	3	Q9NQ88,Q9NRR5
1	358	2	GO:0016236	BP	macroautophagy	4	Q9NQ88,Q9NRR5
1	814	2	GO:0044764	BP	multi-organism cellular process	3	Q86U42,P09651
1	801	2	GO:0016032	BP	viral process	4	Q86U42,P09651
1	447	1	GO:0019058	BP	viral life cycle	5	Q86U42
1	66	1	GO:0019048	BP	modulation by virus of host morphology or physiology	5	Q86U42
1	240	1	GO:0006457	BP	protein folding	3	P30533
0.0018	12573	25	GO:0044763	BP	single-organism cellular process	3	Q15717,Q96EP5,Q9NQ88,O60828,P16930,P41223,Q9UQE7,Q13895,Q07666,P22626,P09496,P18846,P25325,Q9BQ69,P09651,P30154,Q14103,O00422,P32754,Q9NRR5,P30533,Q92922,O94992,Q99729,P62805
1	617	1	GO:0007017	BP	microtubule-based process	4	Q9UQE7
1	672	1	GO:0051301	BP	cell division	4	Q9UQE7
1	1796	4	GO:0007049	BP	cell cycle	4	Q9UQE7,Q07666,O94992,P62805
1	1038	3	GO:0000278	BP	mitotic cell cycle	5	Q9UQE7,Q07666,P62805
1	1979	1	GO:0006928	BP	movement of cell or subcellular component	4	P09496
1	6420	12	GO:0007154	BP	cell communication	4	Q9NQ88,P41223,Q9UQE7,Q07666,P09496,P18846,P30154,Q9NRR5,P30533,Q92922,O94992,P62805
1	279	1	GO:0007059	BP	chromosome segregation	4	Q9UQE7
1	2026	3	GO:0008219	BP	cell death	4	Q9NQ88,P30154,O00422
1	295	1	GO:0070997	BP	neuron death	5	Q9NQ88
1	1921	3	GO:0012501	BP	programmed cell death	5	Q9NQ88,P30154,O00422
1	1901	3	GO:0006915	BP	apoptotic process	6	Q9NQ88,P30154,O00422
1	461	1	GO:0097285	BP	cell-type specific apoptotic process	7	Q9NQ88
1	52	1	GO:0010657	BP	muscle cell apoptotic process	8	Q9NQ88
1	28	1	GO:0010658	BP	striated muscle cell apoptotic process	9	Q9NQ88
1	25	1	GO:0010659	BP	cardiac muscle cell apoptotic process	10	Q9NQ88
1	32	1	GO:1902742	BP	apoptotic process involved in development	7	P30154
1	1319	2	GO:0022402	BP	cell cycle process	4	Q9UQE7,Q07666
1	216	1	GO:0098813	BP	nuclear chromosome segregation	5	Q9UQE7
1	507	1	GO:0044770	BP	cell cycle phase transition	5	Q07666
1	197	1	GO:0044839	BP	cell cycle G2/M phase transition	6	Q07666
1	865	2	GO:1903047	BP	mitotic cell cycle process	5	Q9UQE7,Q07666
1	483	1	GO:0044772	BP	mitotic cell cycle phase transition	6	Q07666
1	193	1	GO:0000086	BP	G2/M transition of mitotic cell cycle	7	Q07666
0.461	4112	11	GO:0048869	BP	cellular developmental process	4	Q15717,Q96EP5,Q9NQ88,O60828,Q13895,P09496,P18846,P30154,Q14103,Q99729,P62805
1	3859	10	GO:0030154	BP	cell differentiation	5	Q15717,Q96EP5,Q9NQ88,O60828,Q13895,P09496,P18846,P30154,Q99729,P62805
1	281	2	GO:0048863	BP	stem cell differentiation	6	Q15717,Q99729
1	612	1	GO:0030855	BP	epithelial cell differentiation	6	Q9NQ88
1	142	1	GO:0002065	BP	columnar/cuboidal epithelial cell differentiation	7	Q9NQ88
1	2	1	GO:0043697	BP	cell dedifferentiation	5	Q14103
1	1	1	GO:1990828	BP	hepatocyte dedifferentiation	6	Q14103
1	2225	7	GO:0048468	BP	cell development	5	Q15717,Q9NQ88,O60828,P09496,P18846,P30154,Q99729
1	180	1	GO:0048864	BP	stem cell development	6	Q99729
1	227	1	GO:0002064	BP	epithelial cell development	6	Q9NQ88
1	38	1	GO:0002066	BP	columnar/cuboidal epithelial cell development	7	Q9NQ88
1	42	1	GO:0010623	BP	developmental programmed cell death	5	P30154
1	26	1	GO:0060561	BP	apoptotic process involved in morphogenesis	6	P30154
7.75e-24	10390	42	GO:0044237	BP	cellular metabolic process	3	Q15717,Q96EP5,Q9NQ88,P35637,P52272,Q86U42,Q9H307,O00567,O60828,P56270,P16930,P41223,O00151,Q9UQE7,Q13895,Q07666,P22626,P18846,Q9ULA0,P55795,P25325,Q9BQ69,P09651,P30154,Q14103,O00422,O14979,P32754,Q9NRR5,P61326,P31943,P52597,P51991,Q01780,Q92922,Q13151,Q66PJ3,Q01844,O94992,P36776,Q99729,P62805
1	3149	4	GO:0006793	BP	phosphorus metabolic process	4	Q9NQ88,P18846,P30154,O94992
1	3088	4	GO:0006796	BP	phosphate-containing compound metabolic process	5	Q9NQ88,P18846,P30154,O94992
1	2213	3	GO:0016310	BP	phosphorylation	6	Q9NQ88,P18846,O94992
1	434	2	GO:0016311	BP	dephosphorylation	6	Q9NQ88,P30154
1	1081	1	GO:0019637	BP	organophosphate metabolic process	5	Q9NQ88
1	27	1	GO:0051156	BP	glucose 6-phosphate metabolic process	6	Q9NQ88
1	156	1	GO:0046434	BP	organophosphate catabolic process	6	Q9NQ88
1	6	1	GO:0030388	BP	fructose 1,6-bisphosphate metabolic process	6	Q9NQ88
1	534	1	GO:0019693	BP	ribose phosphate metabolic process	6	Q9NQ88
1	6	1	GO:0006003	BP	fructose 2,6-bisphosphate metabolic process	6	Q9NQ88
0.00134	1736	10	GO:0044248	BP	cellular catabolic process	4	Q9NQ88,P16930,P25325,Q14103,P32754,Q9NRR5,P61326,Q01780,Q92922,P36776
3.87e-21	8596	38	GO:0044260	BP	cellular macromolecule metabolic process	4	Q15717,Q96EP5,Q9NQ88,P35637,P52272,Q86U42,Q9H307,O00567,O60828,P56270,P41223,O00151,Q9UQE7,Q13895,Q07666,P22626,P18846,P55795,Q9BQ69,P09651,P30154,Q14103,O00422,O14979,Q9NRR5,P61326,P31943,P52597,P51991,Q01780,Q92922,Q13151,Q66PJ3,Q01844,O94992,P36776,Q99729,P62805
1	280	1	GO:0043414	BP	macromolecule methylation	5	P62805
0.0442	5157	14	GO:0044267	BP	cellular protein metabolic process	5	Q15717,Q9UQE7,Q07666,P22626,P18846,Q9BQ69,P30154,Q14103,Q9NRR5,P61326,Q92922,O94992,P36776,P62805
1	3959	6	GO:0006464	BP	cellular protein modification process	6	Q9UQE7,P18846,Q9BQ69,P30154,O94992,P62805
1	1023	1	GO:0070647	BP	protein modification by small protein conjugation or removal	7	Q9UQE7
1	896	1	GO:0032446	BP	protein modification by small protein conjugation	8	Q9UQE7
1	42	1	GO:0008214	BP	protein dealkylation	7	P62805
1	42	1	GO:0006482	BP	protein demethylation	8	P62805
1	478	1	GO:0043687	BP	post-translational protein modification	7	Q9UQE7
1	4	1	GO:0051725	BP	protein de-ADP-ribosylation	7	Q9BQ69
1	1367	1	GO:0018193	BP	peptidyl-amino acid modification	7	Q9UQE7
1	398	1	GO:0018205	BP	peptidyl-lysine modification	8	Q9UQE7
1	127	1	GO:0016925	BP	protein sumoylation	9	Q9UQE7
1	1849	2	GO:0006468	BP	protein phosphorylation	7	P18846,O94992
1	335	1	GO:0006470	BP	protein dephosphorylation	7	P30154
0.175	956	6	GO:0044265	BP	cellular macromolecule catabolic process	5	Q14103,Q9NRR5,P61326,Q01780,Q92922,P36776
1	598	4	GO:0043632	BP	modification-dependent macromolecule catabolic process	6	Q9NRR5,Q01780,Q92922,P36776
1	681	3	GO:0044257	BP	cellular protein catabolic process	6	Q9NRR5,Q92922,P36776
1	650	3	GO:0051603	BP	proteolysis involved in cellular protein catabolic process	7	Q9NRR5,Q92922,P36776
1	17	1	GO:0006515	BP	misfolded or incompletely synthesized protein catabolic process	8	P36776
1	409	2	GO:0010498	BP	proteasomal protein catabolic process	8	Q9NRR5,Q92922
1	590	3	GO:0019941	BP	modification-dependent protein catabolic process	8	Q9NRR5,Q92922,P36776
1	1	1	GO:0070407	BP	oxidation-dependent protein catabolic process	9	P36776
1	582	2	GO:0006511	BP	ubiquitin-dependent protein catabolic process	9	Q9NRR5,Q92922
1	383	2	GO:0043161	BP	proteasome-mediated ubiquitin-dependent protein catabolic process	10	Q9NRR5,Q92922
1	366	1	GO:0051186	BP	cofactor metabolic process	4	Q9NQ88
1	306	1	GO:0006732	BP	coenzyme metabolic process	5	Q9NQ88
1	142	1	GO:0006733	BP	oxidoreduction coenzyme metabolic process	6	Q9NQ88
1.15e-22	5905	35	GO:0046483	BP	heterocycle metabolic process	4	Q96EP5,Q9NQ88,P35637,P52272,Q86U42,Q9H307,O00567,O60828,P56270,P41223,O00151,Q9UQE7,Q13895,Q07666,P22626,P18846,P55795,Q9BQ69,P09651,Q14103,O00422,O14979,P61326,P31943,P52597,P51991,Q01780,Q92922,Q13151,Q66PJ3,Q01844,O94992,P36776,Q99729,P62805
0.736	444	4	GO:0046700	BP	heterocycle catabolic process	5	Q9NQ88,Q14103,P61326,Q01780
1	248	1	GO:0072593	BP	reactive oxygen species metabolic process	4	Q9NQ88
1	491	1	GO:0006091	BP	generation of precursor metabolites and energy	4	Q9NQ88
1	402	1	GO:0015980	BP	energy derivation by oxidation of organic compounds	5	Q9NQ88
1	5	1	GO:0006113	BP	fermentation	6	Q9NQ88
1.44e-25	5921	37	GO:0006725	BP	cellular aromatic compound metabolic process	4	Q96EP5,Q9NQ88,P35637,P52272,Q86U42,Q9H307,O00567,O60828,P56270,P16930,P41223,O00151,Q9UQE7,Q13895,Q07666,P22626,P18846,P55795,Q9BQ69,P09651,Q14103,O00422,O14979,P32754,P61326,P31943,P52597,P51991,Q01780,Q92922,Q13151,Q66PJ3,Q01844,O94992,P36776,Q99729,P62805
0.00268	455	6	GO:0019439	BP	aromatic compound catabolic process	5	Q9NQ88,P16930,Q14103,P32754,P61326,Q01780
1	383	1	GO:0006790	BP	sulfur compound metabolic process	4	P25325
1	7	1	GO:0070813	BP	hydrogen sulfide metabolic process	5	P25325
5e-09	6210	24	GO:0044249	BP	cellular biosynthetic process	4	Q15717,Q9NQ88,P35637,Q86U42,Q9H307,O60828,P56270,P41223,O00151,Q9UQE7,Q07666,P22626,P18846,P25325,P09651,Q14103,O00422,O14979,P61326,Q92922,Q01844,O94992,Q99729,P62805
4.01e-08	4381	20	GO:0019438	BP	aromatic compound biosynthetic process	5	Q9NQ88,P35637,Q86U42,Q9H307,O60828,P56270,P41223,O00151,Q07666,P22626,P18846,Q14103,O00422,O14979,P61326,Q92922,Q01844,O94992,Q99729,P62805
3.96e-08	4378	20	GO:0018130	BP	heterocycle biosynthetic process	5	Q9NQ88,P35637,Q86U42,Q9H307,O60828,P56270,P41223,O00151,Q07666,P22626,P18846,Q14103,O00422,O14979,P61326,Q92922,Q01844,O94992,Q99729,P62805
1	217	1	GO:0044272	BP	sulfur compound biosynthetic process	5	P25325
1	5	1	GO:0070814	BP	hydrogen sulfide biosynthetic process	6	P25325
8.31e-09	5123	22	GO:0034645	BP	cellular macromolecule biosynthetic process	5	Q15717,Q9NQ88,Q86U42,Q9H307,O60828,P56270,P41223,O00151,Q9UQE7,Q07666,P22626,P18846,P09651,Q14103,O00422,O14979,P61326,Q92922,Q01844,O94992,Q99729,P62805
1.71e-28	6616	40	GO:0034641	BP	cellular nitrogen compound metabolic process	4	Q15717,Q96EP5,Q9NQ88,P35637,P52272,Q86U42,Q9H307,O00567,O60828,P56270,P16930,P41223,O00151,Q9UQE7,Q13895,Q07666,P22626,P18846,Q9ULA0,P55795,P25325,Q9BQ69,P09651,Q14103,O00422,O14979,P32754,P61326,P31943,P52597,P51991,Q01780,Q92922,Q13151,Q66PJ3,Q01844,O94992,P36776,Q99729,P62805
0.0459	444	5	GO:0044270	BP	cellular nitrogen compound catabolic process	5	Q9NQ88,P25325,Q14103,P61326,Q01780
3.8e-08	4934	21	GO:0044271	BP	cellular nitrogen compound biosynthetic process	5	Q15717,Q9NQ88,P35637,Q86U42,Q9H307,O60828,P56270,P41223,O00151,Q07666,P22626,P18846,Q14103,O00422,O14979,P61326,Q92922,Q01844,O94992,Q99729,P62805
1	136	1	GO:0072524	BP	pyridine-containing compound metabolic process	5	Q9NQ88
1	575	2	GO:0072521	BP	purine-containing compound metabolic process	5	Q9NQ88,Q9BQ69
1	56	1	GO:0072523	BP	purine-containing compound catabolic process	6	Q9NQ88
0.0222	1004	7	GO:0043603	BP	cellular amide metabolic process	5	Q15717,Q9NQ88,Q07666,P22626,Q9ULA0,Q14103,P61326
0.653	784	5	GO:0043604	BP	amide biosynthetic process	6	Q15717,Q07666,P22626,Q14103,P61326
0.0833	835	6	GO:0006518	BP	peptide metabolic process	6	Q15717,Q07666,P22626,Q9ULA0,Q14103,P61326
0.404	706	5	GO:0043043	BP	peptide biosynthetic process	7	Q15717,Q07666,P22626,Q14103,P61326
0.333	677	5	GO:0006412	BP	translation	8	Q15717,Q07666,P22626,Q14103,P61326
3.95e-23	5722	35	GO:0006139	BP	nucleobase-containing compound metabolic process	5	Q96EP5,Q9NQ88,P35637,P52272,Q86U42,Q9H307,O00567,O60828,P56270,P41223,O00151,Q9UQE7,Q13895,Q07666,P22626,P18846,P55795,Q9BQ69,P09651,Q14103,O00422,O14979,P61326,P31943,P52597,P51991,Q01780,Q92922,Q13151,Q66PJ3,Q01844,O94992,P36776,Q99729,P62805
2.75e-23	5125	34	GO:0090304	BP	nucleic acid metabolic process	6	Q96EP5,Q9NQ88,P35637,P52272,Q86U42,Q9H307,O00567,O60828,P56270,P41223,O00151,Q9UQE7,Q13895,Q07666,P22626,P18846,P55795,P09651,Q14103,O00422,O14979,P61326,P31943,P52597,P51991,Q01780,Q92922,Q13151,Q66PJ3,Q01844,O94992,P36776,Q99729,P62805
1	258	1	GO:0090305	BP	nucleic acid phosphodiester bond hydrolysis	7	Q01780
6.51e-22	4606	32	GO:0016070	BP	RNA metabolic process	7	Q96EP5,Q9NQ88,P35637,P52272,Q86U42,Q9H307,O00567,O60828,P56270,P41223,O00151,Q13895,Q07666,P22626,P18846,P55795,P09651,Q14103,O00422,O14979,P61326,P31943,P52597,P51991,Q01780,Q92922,Q13151,Q66PJ3,Q01844,O94992,Q99729,P62805
2.39e-24	631	20	GO:0016071	BP	mRNA metabolic process	8	Q96EP5,P35637,P52272,Q86U42,Q9H307,O60828,P41223,Q07666,P22626,P55795,P09651,Q14103,O00422,P61326,P31943,P52597,P51991,Q01780,Q13151,Q66PJ3
1	24	1	GO:0008334	BP	histone mRNA metabolic process	9	Q01780
0.986	480	4	GO:0034660	BP	ncRNA metabolic process	8	O00567,Q13895,P22626,Q01780
1	4	1	GO:0071043	BP	CUT metabolic process	9	Q01780
0.51	161	3	GO:0016072	BP	rRNA metabolic process	9	O00567,Q13895,Q01780
1	126	1	GO:0009451	BP	RNA modification	8	O00567
1	113	1	GO:0090501	BP	RNA phosphodiester bond hydrolysis	8	Q01780
1	30	1	GO:0090503	BP	RNA phosphodiester bond hydrolysis, exonucleolytic	9	Q01780
1.81e-27	821	23	GO:0006396	BP	RNA processing	8	Q96EP5,P35637,P52272,Q86U42,Q9H307,O00567,O60828,P41223,Q13895,Q07666,P22626,P55795,P09651,Q14103,O00422,O14979,P61326,P31943,P52597,P51991,Q01780,Q13151,Q66PJ3
0.241	331	4	GO:0034470	BP	ncRNA processing	9	O00567,Q13895,P22626,Q01780
0.456	155	3	GO:0006364	BP	rRNA processing	10	O00567,Q13895,Q01780
1	22	1	GO:0000460	BP	maturation of 5.8S rRNA	11	Q01780
1	32	1	GO:0030490	BP	maturation of SSU-rRNA	11	Q13895
1	26	1	GO:0000462	BP	maturation of SSU-rRNA from tricistronic rRNA transcript (SSU-rRNA, 5.8S rRNA, LSU-rRNA)	12	Q13895
1	22	1	GO:0000154	BP	rRNA modification	11	O00567
1.28e-24	383	18	GO:0008380	BP	RNA splicing	9	Q96EP5,P35637,P52272,Q86U42,Q9H307,O60828,P41223,P22626,P55795,P09651,Q14103,O00422,P61326,P31943,P52597,P51991,Q13151,Q66PJ3
9.72e-25	289	17	GO:0000375	BP	RNA splicing, via transesterification reactions	10	Q96EP5,P35637,P52272,Q86U42,Q9H307,O60828,P41223,P22626,P55795,P09651,Q14103,O00422,P61326,P31943,P52597,P51991,Q13151
7.63e-25	285	17	GO:0000377	BP	RNA splicing, via transesterification reactions with bulged adenosine as nucleophile	11	Q96EP5,P35637,P52272,Q86U42,Q9H307,O60828,P41223,P22626,P55795,P09651,Q14103,O00422,P61326,P31943,P52597,P51991,Q13151
1	109	2	GO:0031123	BP	RNA 3'-end processing	9	Q86U42,P61326
3.11e-25	454	19	GO:0006397	BP	mRNA processing	9	Q96EP5,P35637,P52272,Q86U42,Q9H307,O60828,P41223,Q07666,P22626,P55795,P09651,Q14103,O00422,P61326,P31943,P52597,P51991,Q13151,Q66PJ3
1	83	2	GO:0031124	BP	mRNA 3'-end processing	10	Q86U42,P61326
7.63e-25	285	17	GO:0000398	BP	mRNA splicing, via spliceosome	10	Q96EP5,P35637,P52272,Q86U42,Q9H307,O60828,P41223,P22626,P55795,P09651,Q14103,O00422,P61326,P31943,P52597,P51991,Q13151
3.09e-07	41	5	GO:0000380	BP	alternative mRNA splicing, via spliceosome	11	P52272,O60828,P09651,O00422,P61326
0.199	978	6	GO:0006259	BP	DNA metabolic process	7	Q9NQ88,Q9UQE7,P18846,P09651,P36776,P62805
1	298	1	GO:0006310	BP	DNA recombination	8	P62805
1	122	1	GO:0006304	BP	DNA modification	8	P62805
1	102	1	GO:0044728	BP	DNA methylation or demethylation	9	P62805
1	89	1	GO:0006305	BP	DNA alkylation	9	P62805
1	338	3	GO:0006260	BP	DNA replication	8	Q9UQE7,P18846,P09651
1	57	1	GO:0006278	BP	RNA-dependent DNA replication	9	P09651
1	127	1	GO:0006261	BP	DNA-dependent DNA replication	9	Q9UQE7
1	50	1	GO:0044786	BP	cell cycle DNA replication	10	Q9UQE7
1	9	1	GO:0042023	BP	DNA endoreduplication	11	Q9UQE7
0.487	398	4	GO:0034655	BP	nucleobase-containing compound catabolic process	6	Q9NQ88,Q14103,P61326,Q01780
1	241	3	GO:0006401	BP	RNA catabolic process	7	Q14103,P61326,Q01780
1	7	1	GO:0043633	BP	polyadenylation-dependent RNA catabolic process	8	Q01780
1	24	1	GO:0034661	BP	ncRNA catabolic process	8	Q01780
1	6	1	GO:0043634	BP	polyadenylation-dependent ncRNA catabolic process	9	Q01780
1	17	1	GO:0016075	BP	rRNA catabolic process	9	Q01780
1	4	1	GO:0071034	BP	CUT catabolic process	9	Q01780
1	15	1	GO:0071025	BP	RNA surveillance	8	Q01780
1	13	1	GO:0071027	BP	nuclear RNA surveillance	9	Q01780
1	6	1	GO:0071029	BP	nuclear ncRNA surveillance	10	Q01780
1	6	1	GO:0071046	BP	nuclear polyadenylation-dependent ncRNA catabolic process	11	Q01780
1	6	1	GO:0071035	BP	nuclear polyadenylation-dependent rRNA catabolic process	12	Q01780
1	212	2	GO:0006402	BP	mRNA catabolic process	8	P61326,Q01780
1	196	2	GO:0000956	BP	nuclear-transcribed mRNA catabolic process	9	P61326,Q01780
1	123	2	GO:0000184	BP	nuclear-transcribed mRNA catabolic process, nonsense-mediated decay	10	P61326,Q01780
1	10	1	GO:0071044	BP	histone mRNA catabolic process	10	Q01780
1	13	1	GO:0071028	BP	nuclear mRNA surveillance	10	Q01780
1	3	1	GO:0071030	BP	nuclear mRNA surveillance of spliceosomal pre-mRNA splicing	11	Q01780
1	5	1	GO:0071033	BP	nuclear retention of pre-mRNA at the site of transcription	11	Q01780
1	3	1	GO:0071048	BP	nuclear retention of unspliced pre-mRNA at the site of transcription	12	Q01780
2.98e-08	4310	20	GO:0034654	BP	nucleobase-containing compound biosynthetic process	6	Q9NQ88,P35637,Q86U42,Q9H307,O60828,P56270,P41223,O00151,Q07666,P22626,P18846,Q14103,O00422,O14979,P61326,Q92922,Q01844,O94992,Q99729,P62805
4.91e-09	3903	20	GO:0032774	BP	RNA biosynthetic process	7	Q9NQ88,P35637,Q86U42,Q9H307,O60828,P56270,P41223,O00151,Q07666,P22626,P18846,Q14103,O00422,O14979,P61326,Q92922,Q01844,O94992,Q99729,P62805
2.75e-09	3781	20	GO:0097659	BP	nucleic acid-templated transcription	8	Q9NQ88,P35637,Q86U42,Q9H307,O60828,P56270,P41223,O00151,Q07666,P22626,P18846,Q14103,O00422,O14979,P61326,Q92922,Q01844,O94992,Q99729,P62805
2.78e-08	3766	19	GO:0006351	BP	transcription, DNA-templated	9	Q9NQ88,Q86U42,Q9H307,O60828,P56270,P41223,O00151,Q07666,P22626,P18846,Q14103,O00422,O14979,P61326,Q92922,Q01844,O94992,Q99729,P62805
0.000644	2036	11	GO:0006366	BP	transcription from RNA polymerase II promoter	10	Q9NQ88,Q86U42,P56270,P41223,P22626,P18846,O00422,P61326,Q92922,O94992,Q99729
1	321	2	GO:0006352	BP	DNA-templated transcription, initiation	8	Q9NQ88,P56270
1	279	2	GO:0006367	BP	transcription initiation from RNA polymerase II promoter	9	Q9NQ88,P56270
0.11	96	3	GO:0006353	BP	DNA-templated transcription, termination	8	Q86U42,P56270,P61326
0.0129	47	3	GO:0006369	BP	termination of RNA polymerase II transcription	9	Q86U42,P56270,P61326
1	715	2	GO:0055086	BP	nucleobase-containing small molecule metabolic process	6	Q9NQ88,Q9BQ69
1	655	1	GO:0006753	BP	nucleoside phosphate metabolic process	7	Q9NQ88
1	268	1	GO:0009141	BP	nucleoside triphosphate metabolic process	8	Q9NQ88
1	248	1	GO:0009144	BP	purine nucleoside triphosphate metabolic process	9	Q9NQ88
1	247	1	GO:0009199	BP	ribonucleoside triphosphate metabolic process	9	Q9NQ88
1	241	1	GO:0009205	BP	purine ribonucleoside triphosphate metabolic process	10	Q9NQ88
1	286	1	GO:0009123	BP	nucleoside monophosphate metabolic process	8	Q9NQ88
1	274	1	GO:0009161	BP	ribonucleoside monophosphate metabolic process	9	Q9NQ88
1	263	1	GO:0009126	BP	purine nucleoside monophosphate metabolic process	9	Q9NQ88
1	262	1	GO:0009167	BP	purine ribonucleoside monophosphate metabolic process	10	Q9NQ88
1	106	1	GO:1901292	BP	nucleoside phosphate catabolic process	8	Q9NQ88
1	117	1	GO:0009132	BP	nucleoside diphosphate metabolic process	8	Q9NQ88
1	96	1	GO:0009185	BP	ribonucleoside diphosphate metabolic process	9	Q9NQ88
1	94	1	GO:0009135	BP	purine nucleoside diphosphate metabolic process	9	Q9NQ88
1	94	1	GO:0009179	BP	purine ribonucleoside diphosphate metabolic process	10	Q9NQ88
1	648	1	GO:0009117	BP	nucleotide metabolic process	8	Q9NQ88
1	129	1	GO:0019362	BP	pyridine nucleotide metabolic process	9	Q9NQ88
1	129	1	GO:0046496	BP	nicotinamide nucleotide metabolic process	10	Q9NQ88
1	62	1	GO:0019674	BP	NAD metabolic process	11	Q9NQ88
1	40	1	GO:0006734	BP	NADH metabolic process	12	Q9NQ88
1	36	1	GO:0006739	BP	NADP metabolic process	11	Q9NQ88
1	95	1	GO:0046939	BP	nucleotide phosphorylation	9	Q9NQ88
1	89	1	GO:0006165	BP	nucleoside diphosphate phosphorylation	10	Q9NQ88
1	520	1	GO:0009259	BP	ribonucleotide metabolic process	9	Q9NQ88
1	526	1	GO:0006163	BP	purine nucleotide metabolic process	9	Q9NQ88
1	505	1	GO:0009150	BP	purine ribonucleotide metabolic process	10	Q9NQ88
1	99	1	GO:0009166	BP	nucleotide catabolic process	9	Q9NQ88
1	49	1	GO:0006195	BP	purine nucleotide catabolic process	10	Q9NQ88
1	390	2	GO:0009116	BP	nucleoside metabolic process	7	Q9NQ88,Q9BQ69
1	366	1	GO:0009119	BP	ribonucleoside metabolic process	8	Q9NQ88
1	340	2	GO:0042278	BP	purine nucleoside metabolic process	8	Q9NQ88,Q9BQ69
1	337	1	GO:0046128	BP	purine ribonucleoside metabolic process	9	Q9NQ88
1	225	1	GO:0046034	BP	ATP metabolic process	10	Q9NQ88
1	79	1	GO:0046031	BP	ADP metabolic process	10	Q9NQ88
1	71	1	GO:0006757	BP	ATP generation from ADP	11	Q9NQ88
1	320	1	GO:0006575	BP	cellular modified amino acid metabolic process	4	P25325
1	292	1	GO:0044262	BP	cellular carbohydrate metabolic process	4	Q9NQ88
1	77	1	GO:0044275	BP	cellular carbohydrate catabolic process	5	Q9NQ88
1	85	1	GO:0006081	BP	cellular aldehyde metabolic process	4	Q9NQ88
1	21	1	GO:0019682	BP	glyceraldehyde-3-phosphate metabolic process	5	Q9NQ88
1	18	1	GO:0006098	BP	pentose-phosphate shunt	6	Q9NQ88
1	1246	4	GO:0006082	BP	organic acid metabolic process	4	Q9NQ88,P16930,P25325,P32754
1	1230	4	GO:0043436	BP	oxoacid metabolic process	5	Q9NQ88,P16930,P25325,P32754
1	1106	4	GO:0019752	BP	carboxylic acid metabolic process	6	Q9NQ88,P16930,P25325,P32754
1	612	1	GO:0032787	BP	monocarboxylic acid metabolic process	7	Q9NQ88
1	105	1	GO:0006090	BP	pyruvate metabolic process	8	Q9NQ88
1	4	1	GO:0019660	BP	glycolytic fermentation	9	Q9NQ88
1	70	1	GO:0006096	BP	glycolytic process	9	Q9NQ88
1	16	1	GO:0006089	BP	lactate metabolic process	8	Q9NQ88
1	4	1	GO:0019659	BP	glucose catabolic process to lactate	9	Q9NQ88
1	4	1	GO:0019661	BP	glucose catabolic process to lactate via pyruvate	10	Q9NQ88
1	518	3	GO:0006520	BP	cellular amino acid metabolic process	7	P16930,P25325,P32754
1	351	3	GO:1901605	BP	alpha-amino acid metabolic process	8	P16930,P25325,P32754
0.0718	12	2	GO:1902221	BP	erythrose 4-phosphate/phosphoenolpyruvate family amino acid metabolic process	9	P16930,P32754
1	72	1	GO:0009064	BP	glutamine family amino acid metabolic process	9	P16930
1	20	1	GO:0006525	BP	arginine metabolic process	10	P16930
1	127	1	GO:0009069	BP	serine family amino acid metabolic process	9	P25325
1	5	1	GO:0009092	BP	homoserine metabolic process	10	P25325
1	45	1	GO:0000096	BP	sulfur amino acid metabolic process	8	P25325
1	14	1	GO:0050667	BP	homocysteine metabolic process	9	P25325
1	10	1	GO:0006534	BP	cysteine metabolic process	9	P25325
1	5	1	GO:0019346	BP	transsulfuration	10	P25325
0.469	30	2	GO:0009072	BP	aromatic amino acid family metabolic process	8	P16930,P32754
0.049	10	2	GO:0006570	BP	tyrosine metabolic process	9	P16930,P32754
0.0718	12	2	GO:0006558	BP	L-phenylalanine metabolic process	9	P16930,P32754
1	2	1	GO:0009439	BP	cyanate metabolic process	5	P25325
1	2	1	GO:0009440	BP	cyanate catabolic process	6	P25325
1	231	2	GO:0016054	BP	organic acid catabolic process	5	P16930,P32754
1	231	2	GO:0046395	BP	carboxylic acid catabolic process	6	P16930,P32754
1	123	2	GO:0009063	BP	cellular amino acid catabolic process	7	P16930,P32754
1	99	2	GO:1901606	BP	alpha-amino acid catabolic process	8	P16930,P32754
1	25	1	GO:0009065	BP	glutamine family amino acid catabolic process	9	P16930
1	10	1	GO:0006527	BP	arginine catabolic process	10	P16930
0.0599	11	2	GO:1902222	BP	erythrose 4-phosphate/phosphoenolpyruvate family amino acid catabolic process	9	P16930,P32754
0.228	21	2	GO:0009074	BP	aromatic amino acid family catabolic process	8	P16930,P32754
0.0109	5	2	GO:0006572	BP	tyrosine catabolic process	9	P16930,P32754
0.0599	11	2	GO:0006559	BP	L-phenylalanine catabolic process	9	P16930,P32754
1	273	1	GO:0006413	BP	translational initiation	4	Q07666
1	6199	13	GO:0016043	BP	cellular component organization	3	Q9NQ88,O60828,Q9UQE7,P09496,P18846,P09651,P30154,O00422,Q9NRR5,Q92922,P36776,Q99729,P62805
1	2636	8	GO:0043933	BP	macromolecular complex subunit organization	4	O60828,Q9UQE7,P18846,P30154,O00422,Q92922,P36776,P62805
1	1879	6	GO:0071822	BP	protein complex subunit organization	5	Q9UQE7,P18846,P30154,Q92922,P36776,P62805
1	220	2	GO:0071824	BP	protein-DNA complex subunit organization	5	Q92922,P62805
1	213	1	GO:0071826	BP	ribonucleoprotein complex subunit organization	5	O60828
1	773	2	GO:0022411	BP	cellular component disassembly	4	Q9NQ88,Q92922
1	320	1	GO:0032984	BP	macromolecular complex disassembly	5	Q92922
1	17	1	GO:0032986	BP	protein-DNA complex disassembly	6	Q92922
1	309	1	GO:0043241	BP	protein complex disassembly	6	Q92922
1	1567	3	GO:0032989	BP	cellular component morphogenesis	4	O60828,P09496,Q99729
1	1487	3	GO:0000902	BP	cell morphogenesis	5	O60828,P09496,Q99729
1	1068	3	GO:0000904	BP	cell morphogenesis involved in differentiation	6	O60828,P09496,Q99729
1	1133	2	GO:0032990	BP	cell part morphogenesis	5	O60828,P09496
1	3711	9	GO:0006996	BP	organelle organization	4	Q9NQ88,O60828,Q9UQE7,P09651,O00422,Q9NRR5,Q92922,P36776,P62805
1	589	1	GO:0048285	BP	organelle fission	5	Q9UQE7
1	550	1	GO:0000280	BP	nuclear division	6	Q9UQE7
1	2656	6	GO:1902589	BP	single-organism organelle organization	5	Q9NQ88,Q9UQE7,P09651,Q9NRR5,Q92922,P62805
1	237	1	GO:1903008	BP	organelle disassembly	6	Q9NQ88
1	219	1	GO:0061726	BP	mitochondrion disassembly	7	Q9NQ88
1	427	1	GO:0007067	BP	mitotic nuclear division	6	Q9UQE7
1	765	2	GO:0007005	BP	mitochondrion organization	5	Q9NQ88,P36776
1	30	1	GO:0000002	BP	mitochondrial genome maintenance	6	P36776
1	20	1	GO:0032042	BP	mitochondrial DNA metabolic process	7	P36776
1	219	1	GO:0000422	BP	mitophagy	6	Q9NQ88
1	158	1	GO:0000423	BP	macromitophagy	7	Q9NQ88
1	1091	1	GO:0007010	BP	cytoskeleton organization	5	Q9UQE7
1	434	1	GO:0000226	BP	microtubule cytoskeleton organization	6	Q9UQE7
1	133	1	GO:0007051	BP	spindle organization	7	Q9UQE7
1	81	1	GO:0007052	BP	mitotic spindle organization	8	Q9UQE7
1	129	1	GO:0048284	BP	organelle fusion	5	Q9NRR5
1	147	1	GO:0007033	BP	vacuole organization	5	Q9NRR5
1	24	1	GO:0097576	BP	vacuole fusion	6	Q9NRR5
1	1126	5	GO:0051276	BP	chromosome organization	5	Q9UQE7,P09651,O00422,Q92922,P62805
1	263	1	GO:0071103	BP	DNA conformation change	6	P62805
1	200	1	GO:0006323	BP	DNA packaging	7	P62805
1	145	2	GO:0032200	BP	telomere organization	6	P09651,P62805
1	132	2	GO:0000723	BP	telomere maintenance	7	P09651,P62805
1	84	1	GO:0010833	BP	telomere maintenance via telomere lengthening	8	P09651
1	54	1	GO:0007004	BP	telomere maintenance via telomerase	9	P09651
1	768	3	GO:0006325	BP	chromatin organization	6	O00422,Q92922,P62805
1	42	1	GO:0061641	BP	CENP-A containing chromatin organization	7	P62805
1	614	2	GO:0016568	BP	chromatin modification	7	Q92922,P62805
1	442	1	GO:0016569	BP	covalent chromatin modification	8	P62805
1	429	1	GO:0016570	BP	histone modification	9	P62805
1	40	1	GO:0016577	BP	histone demethylation	10	P62805
1	38	1	GO:0070076	BP	histone lysine demethylation	11	P62805
1	16	1	GO:0035574	BP	histone H4-K20 demethylation	12	P62805
1	152	2	GO:0006338	BP	chromatin remodeling	8	Q92922,P62805
1	44	1	GO:0031055	BP	chromatin remodeling at centromere	9	P62805
1	75	2	GO:0043044	BP	ATP-dependent chromatin remodeling	9	Q92922,P62805
1	187	2	GO:0006333	BP	chromatin assembly or disassembly	7	Q92922,P62805
1	19	1	GO:0031498	BP	chromatin disassembly	8	Q92922
1	171	2	GO:0034728	BP	nucleosome organization	7	Q92922,P62805
1	53	1	GO:0034724	BP	DNA replication-independent nucleosome organization	8	P62805
1	32	1	GO:0034723	BP	DNA replication-dependent nucleosome organization	8	P62805
1	54	1	GO:0043486	BP	histone exchange	8	P62805
1	17	1	GO:0006337	BP	nucleosome disassembly	8	Q92922
1	153	1	GO:0000819	BP	sister chromatid segregation	6	Q9UQE7
1	129	1	GO:0000070	BP	mitotic sister chromatid segregation	7	Q9UQE7
1	43	1	GO:0007062	BP	sister chromatid cohesion	6	Q9UQE7
1	17	1	GO:0007064	BP	mitotic sister chromatid cohesion	7	Q9UQE7
1	1129	2	GO:0061024	BP	membrane organization	4	P09496,Q9NRR5
1	915	1	GO:0044802	BP	single-organism membrane organization	5	Q9NRR5
1	170	1	GO:0061025	BP	membrane fusion	5	Q9NRR5
1	142	1	GO:0044801	BP	single-organism membrane fusion	6	Q9NRR5
1	102	1	GO:0090174	BP	organelle membrane fusion	7	Q9NRR5
1	23	1	GO:0097352	BP	autophagosome maturation	8	Q9NRR5
1	2476	5	GO:0022607	BP	cellular component assembly	4	O60828,P18846,P30154,P36776,P62805
1	1649	5	GO:0065003	BP	macromolecular complex assembly	5	O60828,P18846,P30154,P36776,P62805
1	923	4	GO:0034622	BP	cellular macromolecular complex assembly	6	O60828,P18846,P36776,P62805
1	193	1	GO:0065004	BP	protein-DNA complex assembly	7	P62805
1	51	1	GO:0034508	BP	centromere complex assembly	8	P62805
1	203	1	GO:0022618	BP	ribonucleoprotein complex assembly	7	O60828
1	1400	4	GO:0006461	BP	protein complex assembly	6	P18846,P30154,P36776,P62805
1	463	2	GO:0051259	BP	protein oligomerization	7	P36776,P62805
1	265	1	GO:0051260	BP	protein homooligomerization	8	P36776
1	114	1	GO:0051291	BP	protein heterooligomerization	8	P62805
1	134	1	GO:0051262	BP	protein tetramerization	8	P62805
1	38	1	GO:0051290	BP	protein heterotetramerization	9	P62805
1	540	2	GO:0043623	BP	cellular protein complex assembly	7	P18846,P36776
1	15	1	GO:0051131	BP	chaperone-mediated protein complex assembly	8	P36776
1	162	1	GO:0031497	BP	chromatin assembly	6	P62805
1	144	1	GO:0006334	BP	nucleosome assembly	7	P62805
1	32	1	GO:0006335	BP	DNA replication-dependent nucleosome assembly	8	P62805
1	53	1	GO:0006336	BP	DNA replication-independent nucleosome assembly	8	P62805
1	42	1	GO:0034080	BP	CENP-A containing nucleosome assembly	9	P62805
1	581	1	GO:0070925	BP	organelle assembly	5	O60828
1	10	1	GO:0034063	BP	stress granule assembly	6	O60828
1	1521	3	GO:0030030	BP	cell projection organization	4	O60828,P09496,P18846
1	1113	2	GO:0048858	BP	cell projection morphogenesis	5	O60828,P09496
1	228	1	GO:0060271	BP	cilium morphogenesis	6	O60828
0.00125	7207	19	GO:0051716	BP	cellular response to stimulus	3	Q9NQ88,P35637,P52272,P41223,Q9UQE7,Q13895,Q07666,P22626,P09496,P18846,Q9BQ69,P30154,Q14103,Q9NRR5,P30533,Q92922,O94992,P36776,P62805
0.741	183	3	GO:0071216	BP	cellular response to biotic stimulus	4	Q9NQ88,P52272,Q13895
1	6	1	GO:0072396	BP	response to cell cycle checkpoint signaling	5	Q9NQ88
1	6	1	GO:0072402	BP	response to DNA integrity checkpoint signaling	6	Q9NQ88
1	6	1	GO:0072423	BP	response to DNA damage checkpoint signaling	7	Q9NQ88
1	165	2	GO:0071219	BP	cellular response to molecule of bacterial origin	5	P52272,Q13895
0.103	2852	10	GO:0070887	BP	cellular response to chemical stimulus	4	Q9NQ88,P35637,P52272,Q13895,P22626,P09496,P18846,Q14103,Q92922,P36776
1	184	1	GO:0071229	BP	cellular response to acid chemical	5	Q14103
1	1102	4	GO:1901701	BP	cellular response to oxygen-containing compound	5	P52272,Q13895,Q14103,Q92922
1	1	1	GO:1904588	BP	cellular response to glycoprotein	6	P52272
1	1	1	GO:1990831	BP	cellular response to carcinoembryonic antigen	7	P52272
1	735	3	GO:1901699	BP	cellular response to nitrogen compound	5	P22626,Q14103,Q92922
1	21	1	GO:1902170	BP	cellular response to reactive nitrogen species	6	Q14103
1	32	1	GO:0071242	BP	cellular response to ammonium ion	6	Q14103
1	2347	7	GO:0071310	BP	cellular response to organic substance	5	P52272,Q13895,P22626,P09496,P18846,Q14103,Q92922
1	126	1	GO:0097306	BP	cellular response to alcohol	6	Q14103
1	760	1	GO:0071345	BP	cellular response to cytokine stimulus	6	Q13895
1	90	1	GO:0071347	BP	cellular response to interleukin-1	7	Q13895
1	434	3	GO:0071396	BP	cellular response to lipid	6	P52272,Q13895,Q14103
1	158	2	GO:0071222	BP	cellular response to lipopolysaccharide	7	P52272,Q13895
1	425	3	GO:0071407	BP	cellular response to organic cyclic compound	6	Q13895,P22626,Q14103
1	42	1	GO:0071359	BP	cellular response to dsRNA	7	P22626
1	25	1	GO:0031050	BP	dsRNA fragmentation	8	P22626
1	927	3	GO:0071363	BP	cellular response to growth factor stimulus	6	Q13895,P09496,P18846
1	744	2	GO:0032870	BP	cellular response to hormone stimulus	6	Q14103,Q92922
1	168	1	GO:0071383	BP	cellular response to steroid hormone stimulus	7	Q14103
1	42	1	GO:0071391	BP	cellular response to estrogen stimulus	8	Q14103
1	31	1	GO:0071392	BP	cellular response to estradiol stimulus	9	Q14103
1	680	2	GO:0071417	BP	cellular response to organonitrogen compound	6	Q14103,Q92922
1	1	1	GO:1904586	BP	cellular response to putrescine	7	Q14103
1	528	1	GO:1901653	BP	cellular response to peptide	7	Q92922
1	510	1	GO:0071375	BP	cellular response to peptide hormone stimulus	8	Q92922
1	410	1	GO:0032869	BP	cellular response to insulin stimulus	9	Q92922
1	55	1	GO:0071230	BP	cellular response to amino acid stimulus	7	Q14103
0.519	162	3	GO:0071241	BP	cellular response to inorganic substance	5	Q9NQ88,P35637,Q14103
1	140	2	GO:0071248	BP	cellular response to metal ion	6	Q9NQ88,P35637
1	50	1	GO:0071277	BP	cellular response to calcium ion	7	P35637
1	5	1	GO:0071279	BP	cellular response to cobalt ion	7	Q9NQ88
1	156	1	GO:0071453	BP	cellular response to oxygen levels	5	Q9NQ88
1	147	1	GO:0036294	BP	cellular response to decreased oxygen levels	6	Q9NQ88
0.232	1968	8	GO:0033554	BP	cellular response to stress	4	Q9NQ88,Q9UQE7,P18846,Q9BQ69,Q14103,Q9NRR5,P36776,P62805
1	811	4	GO:0006974	BP	cellular response to DNA damage stimulus	5	Q9NQ88,Q9UQE7,Q9BQ69,P62805
1	519	3	GO:0006281	BP	DNA repair	6	Q9NQ88,Q9UQE7,P62805
1	74	1	GO:0000726	BP	non-recombinational repair	7	P62805
1	227	1	GO:0006302	BP	double-strand break repair	7	P62805
1	67	1	GO:0006303	BP	double-strand break repair via nonhomologous end joining	8	P62805
1	155	1	GO:0000725	BP	recombinational repair	7	P62805
1	155	1	GO:0000724	BP	double-strand break repair via homologous recombination	8	P62805
1	229	2	GO:0034599	BP	cellular response to oxidative stress	5	Q14103,P36776
1	133	1	GO:0034614	BP	cellular response to reactive oxygen species	6	Q14103
1	17	1	GO:0071732	BP	cellular response to nitric oxide	7	Q14103
1	140	1	GO:0071456	BP	cellular response to hypoxia	5	Q9NQ88
1	2673	3	GO:0002376	BP	immune system process	2	P09496,P18846,P62805
1	241	1	GO:0019882	BP	antigen processing and presentation	3	P09496
1	181	1	GO:0019884	BP	antigen processing and presentation of exogenous antigen	4	P09496
1	99	1	GO:0002504	BP	antigen processing and presentation of peptide or polysaccharide antigen via MHC class II	4	P09496
1	194	1	GO:0048002	BP	antigen processing and presentation of peptide antigen	4	P09496
1	174	1	GO:0002478	BP	antigen processing and presentation of exogenous peptide antigen	5	P09496
1	96	1	GO:0002495	BP	antigen processing and presentation of peptide antigen via MHC class II	5	P09496
1	92	1	GO:0019886	BP	antigen processing and presentation of exogenous peptide antigen via MHC class II	6	P09496
1	1728	1	GO:0006955	BP	immune response	3	P18846
1	1140	1	GO:0045087	BP	innate immune response	4	P18846
0.118	7212	16	GO:0032501	BP	multicellular organismal process	2	Q15717,Q96EP5,Q9NQ88,Q86U42,O60828,Q9UQE7,Q13895,P09496,P18846,P25325,Q14103,P30533,Q92922,O94992,Q99729,P62805
1	2065	1	GO:0003008	BP	system process	3	Q86U42
1	398	1	GO:0003012	BP	muscle system process	4	Q86U42
1	328	1	GO:0006936	BP	muscle contraction	5	Q86U42
0.0768	6175	15	GO:0044707	BP	single-multicellular organism process	3	Q15717,Q96EP5,Q9NQ88,O60828,Q9UQE7,Q13895,P09496,P18846,P25325,Q14103,P30533,Q92922,O94992,Q99729,P62805
1	7	1	GO:0097242	BP	beta-amyloid clearance	4	P30533
0.158	5038	13	GO:0007275	BP	multicellular organismal development	4	Q15717,Q96EP5,Q9NQ88,O60828,Q13895,P09496,P18846,P25325,Q14103,Q92922,O94992,Q99729,P62805
0.224	4482	12	GO:0048731	BP	system development	5	Q96EP5,Q9NQ88,O60828,Q13895,P09496,P18846,P25325,Q14103,Q92922,O94992,Q99729,P62805
1	151	2	GO:0061008	BP	hepaticobiliary system development	6	P25325,Q14103
1	334	2	GO:0001655	BP	urogenital system development	6	P25325,Q92922
1	2418	7	GO:0007399	BP	nervous system development	6	O60828,Q13895,P09496,P18846,P25325,Q14103,Q92922
1	1727	4	GO:0022008	BP	neurogenesis	7	O60828,Q13895,P09496,P18846
1	1646	4	GO:0048699	BP	generation of neurons	8	O60828,Q13895,P09496,P18846
1	1532	4	GO:0030182	BP	neuron differentiation	9	O60828,Q13895,P09496,P18846
1	1269	3	GO:0048666	BP	neuron development	10	O60828,P09496,P18846
1	1125	3	GO:0031175	BP	neuron projection development	11	O60828,P09496,P18846
1	202	1	GO:0016358	BP	dendrite development	12	O60828
1	789	1	GO:0061564	BP	axon development	12	P09496
1	881	2	GO:0048812	BP	neuron projection morphogenesis	12	O60828,P09496
1	581	1	GO:0097485	BP	neuron projection guidance	13	P09496
1	848	2	GO:0048667	BP	cell morphogenesis involved in neuron differentiation	10	O60828,P09496
1	119	1	GO:0048813	BP	dendrite morphogenesis	11	O60828
1	759	1	GO:0007409	BP	axonogenesis	11	P09496
1	581	1	GO:0007411	BP	axon guidance	12	P09496
1	461	2	GO:0061458	BP	reproductive system development	6	Q96EP5,Q92922
1	3212	8	GO:0048513	BP	animal organ development	6	Q96EP5,Q13895,P25325,Q14103,Q92922,O94992,Q99729,P62805
1	472	3	GO:0048732	BP	gland development	7	P25325,Q14103,Q92922
1	148	2	GO:0001889	BP	liver development	8	P25325,Q14103
1	965	1	GO:0009887	BP	organ morphogenesis	7	Q92922
1	248	1	GO:0060485	BP	mesenchyme development	7	Q99729
1	188	1	GO:0048762	BP	mesenchymal cell differentiation	8	Q99729
1	175	1	GO:0014031	BP	mesenchymal cell development	9	Q99729
1	108	1	GO:0001837	BP	epithelial to mesenchymal transition	10	Q99729
1	160	1	GO:0055123	BP	digestive system development	6	Q9NQ88
1	987	1	GO:0072359	BP	circulatory system development	6	O94992
1	951	3	GO:0007417	BP	central nervous system development	6	Q13895,P25325,Q14103
1	112	1	GO:0021510	BP	spinal cord development	7	P25325
1	719	2	GO:0007420	BP	brain development	7	Q13895,Q14103
1	159	1	GO:0030902	BP	hindbrain development	8	Q14103
1	115	1	GO:0022037	BP	metencephalon development	9	Q14103
1	103	1	GO:0021549	BP	cerebellum development	10	Q14103
1	291	1	GO:0072001	BP	renal system development	6	P25325
1	274	1	GO:0001822	BP	kidney development	7	P25325
1	843	1	GO:0002520	BP	immune system development	6	P62805
1	795	1	GO:0048534	BP	hematopoietic or lymphoid organ development	7	P62805
1	749	1	GO:0030097	BP	hemopoiesis	8	P62805
1	346	1	GO:0030099	BP	myeloid cell differentiation	9	P62805
1	160	1	GO:0002244	BP	hematopoietic progenitor cell differentiation	9	P62805
1	50	1	GO:0030219	BP	megakaryocyte differentiation	10	P62805
1	987	1	GO:0072358	BP	cardiovascular system development	6	O94992
1	538	1	GO:0007507	BP	heart development	7	O94992
1	635	1	GO:0035295	BP	tube development	5	Q9NQ88
1	146	1	GO:0048565	BP	digestive tract development	6	Q9NQ88
1	18	1	GO:0060575	BP	intestinal epithelial cell differentiation	7	Q9NQ88
1	12	1	GO:0060576	BP	intestinal epithelial cell development	8	Q9NQ88
1	1030	1	GO:0009790	BP	embryo development	5	Q13895
1	644	1	GO:0009792	BP	embryo development ending in birth or egg hatching	6	Q13895
1	636	1	GO:0043009	BP	chordate embryonic development	7	Q13895
1	377	1	GO:0001701	BP	in utero embryonic development	8	Q13895
1	77	1	GO:0001824	BP	blastocyst development	9	Q13895
1	36	1	GO:0001825	BP	blastocyst formation	10	Q13895
1	19	1	GO:0001829	BP	trophectodermal cell differentiation	11	Q13895
1	167	2	GO:0019827	BP	stem cell population maintenance	4	Q15717,Q9UQE7
1	259	2	GO:0044706	BP	multi-multicellular organism process	3	Q96EP5,Q13895
1	823	1	GO:0032504	BP	multicellular organism reproduction	3	Q96EP5
1	1400	4	GO:0022414	BP	reproductive process	2	Q96EP5,Q9UQE7,Q13895,Q92922
1	973	2	GO:0044703	BP	multi-organism reproductive process	3	Q96EP5,Q13895
1	787	1	GO:0019953	BP	sexual reproduction	4	Q96EP5
1	208	2	GO:0007565	BP	female pregnancy	4	Q96EP5,Q13895
1	662	2	GO:0003006	BP	developmental process involved in reproduction	3	Q96EP5,Q92922
1	456	2	GO:0048608	BP	reproductive structure development	4	Q96EP5,Q92922
1	1257	3	GO:0044702	BP	single organism reproductive process	3	Q96EP5,Q9UQE7,Q92922
1	210	1	GO:0051321	BP	meiotic cell cycle	4	Q9UQE7
1	174	1	GO:1903046	BP	meiotic cell cycle process	5	Q9UQE7
1	166	1	GO:0007126	BP	meiotic nuclear division	5	Q9UQE7
1	155	1	GO:0001890	BP	placenta development	4	Q96EP5
1	54	1	GO:0030850	BP	prostate gland development	4	Q92922
1	799	1	GO:0048609	BP	multicellular organismal reproductive process	3	Q96EP5
1	630	1	GO:0007276	BP	gamete generation	4	Q96EP5
1	502	1	GO:0048232	BP	male gamete generation	5	Q96EP5
1	501	1	GO:0007283	BP	spermatogenesis	6	Q96EP5
1	64	1	GO:0060135	BP	maternal process involved in female pregnancy	4	Q96EP5
1	33	1	GO:0001893	BP	maternal placenta development	5	Q96EP5
1.43e-11	10984	33	GO:0050789	BP	regulation of biological process	2	Q15717,Q96EP5,Q9NQ88,P35637,P52272,Q86U42,Q9H307,O60828,P56270,P41223,O00151,Q9UQE7,Q07666,P22626,P09496,P18846,P09651,P30154,Q14103,O00422,O14979,Q9NRR5,P61326,P30533,P31943,P52597,Q01780,Q92922,Q13151,Q01844,O94992,Q99729,P62805
1	2603	5	GO:0051239	BP	regulation of multicellular organismal process	3	Q15717,O60828,P18846,P30533,P62805
1	6	1	GO:1900221	BP	regulation of beta-amyloid clearance	4	P30533
1	2414	2	GO:0032879	BP	regulation of localization	3	P52272,Q07666
1	1776	2	GO:0051049	BP	regulation of transport	4	P52272,Q07666
1	11	1	GO:0032239	BP	regulation of nucleobase-containing compound transport	5	Q07666
1	974	1	GO:0032880	BP	regulation of protein localization	4	P52272
1	833	1	GO:0070201	BP	regulation of establishment of protein localization	5	P52272
1	760	1	GO:0051223	BP	regulation of protein transport	6	P52272
1	183	1	GO:1904589	BP	regulation of protein import	7	P52272
1	3740	9	GO:0048583	BP	regulation of response to stimulus	3	Q9NQ88,P41223,Q07666,P09496,P18846,P30154,Q9NRR5,P30533,O94992
1	895	2	GO:0032101	BP	regulation of response to external stimulus	4	Q9NQ88,Q9NRR5
1	126	2	GO:0032104	BP	regulation of response to extracellular stimulus	5	Q9NQ88,Q9NRR5
1	126	2	GO:0032107	BP	regulation of response to nutrient levels	6	Q9NQ88,Q9NRR5
1	239	1	GO:0002831	BP	regulation of response to biotic stimulus	4	Q9NQ88
1	1463	3	GO:0080134	BP	regulation of response to stress	4	Q9NQ88,P18846,Q9NRR5
1	799	1	GO:0031347	BP	regulation of defense response	5	P18846
0.0137	4652	14	GO:0048519	BP	negative regulation of biological process	3	Q9NQ88,Q9UQE7,Q07666,P22626,P09496,P09651,Q14103,O00422,Q9NRR5,P30533,Q92922,O94992,Q99729,P62805
1	1399	4	GO:0048585	BP	negative regulation of response to stimulus	4	Q9NQ88,P09496,Q9NRR5,P30533
1	279	2	GO:0032102	BP	negative regulation of response to external stimulus	5	Q9NQ88,Q9NRR5
0.716	37	2	GO:0032105	BP	negative regulation of response to extracellular stimulus	6	Q9NQ88,Q9NRR5
0.716	37	2	GO:0032108	BP	negative regulation of response to nutrient levels	7	Q9NQ88,Q9NRR5
1	1022	2	GO:0051241	BP	negative regulation of multicellular organismal process	4	P30533,P62805
1	3	1	GO:1900222	BP	negative regulation of beta-amyloid clearance	5	P30533
1	59	1	GO:0097006	BP	regulation of plasma lipoprotein particle levels	3	P30533
1	34	1	GO:0034381	BP	plasma lipoprotein particle clearance	4	P30533
1	15	1	GO:0010984	BP	regulation of lipoprotein particle clearance	5	P30533
1	8	1	GO:0010985	BP	negative regulation of lipoprotein particle clearance	5	P30533
1	7	1	GO:0034447	BP	very-low-density lipoprotein particle clearance	5	P30533
1	5	1	GO:0010915	BP	regulation of very-low-density lipoprotein particle clearance	6	P30533
1	5	1	GO:0010916	BP	negative regulation of very-low-density lipoprotein particle clearance	6	P30533
1	440	1	GO:0032844	BP	regulation of homeostatic process	3	P09651
1	174	1	GO:0032845	BP	negative regulation of homeostatic process	4	P09651
1	3034	6	GO:0023051	BP	regulation of signaling	3	P41223,Q07666,P09496,P30154,P30533,O94992
1	1219	2	GO:0023057	BP	negative regulation of signaling	4	P09496,P30533
1	2175	4	GO:0050793	BP	regulation of developmental process	3	Q15717,O60828,P18846,P62805
1	924	1	GO:0022603	BP	regulation of anatomical structure morphogenesis	4	O60828
1	826	1	GO:0051093	BP	negative regulation of developmental process	4	P62805
1	1631	3	GO:2000026	BP	regulation of multicellular organismal development	4	O60828,P18846,P62805
1	762	2	GO:0051960	BP	regulation of nervous system development	5	O60828,P18846
2.32e-14	6805	30	GO:0019222	BP	regulation of metabolic process	3	Q15717,Q96EP5,Q9NQ88,P35637,Q86U42,Q9H307,O60828,P56270,P41223,O00151,Q9UQE7,Q07666,P22626,P18846,P09651,P30154,Q14103,O00422,O14979,Q9NRR5,P61326,P31943,P52597,Q01780,Q92922,Q13151,Q01844,O94992,Q99729,P62805
4.06e-16	5894	30	GO:0060255	BP	regulation of macromolecule metabolic process	4	Q15717,Q96EP5,Q9NQ88,P35637,Q86U42,Q9H307,O60828,P56270,P41223,O00151,Q9UQE7,Q07666,P22626,P18846,P09651,P30154,Q14103,O00422,O14979,Q9NRR5,P61326,P31943,P52597,Q01780,Q92922,Q13151,Q01844,O94992,Q99729,P62805
1.8e-12	4330	24	GO:0010468	BP	regulation of gene expression	5	Q15717,Q96EP5,Q86U42,Q9H307,O60828,P56270,P41223,O00151,Q07666,P22626,P18846,Q14103,O00422,O14979,P61326,P31943,P52597,Q01780,Q92922,Q13151,Q01844,O94992,Q99729,P62805
0.183	308	4	GO:0040029	BP	regulation of gene expression, epigenetic	6	P22626,O00422,Q01780,P62805
1	10	1	GO:0007549	BP	dosage compensation	7	Q01780
1	8	1	GO:0009048	BP	dosage compensation by inactivation of X chromosome	8	Q01780
1	89	1	GO:0006306	BP	DNA methylation	7	P62805
1	36	1	GO:0032776	BP	DNA methylation on cytosine	8	P62805
0.00265	454	6	GO:0010608	BP	posttranscriptional regulation of gene expression	6	Q15717,Q07666,P22626,Q14103,P61326,Q13151
0.36	143	3	GO:0043487	BP	regulation of RNA stability	7	Q15717,Q14103,Q13151
0.00523	35	3	GO:0043489	BP	RNA stabilization	8	Q15717,Q14103,Q13151
1	15	1	GO:0050779	BP	RNA destabilization	8	Q14103
0.331	139	3	GO:0043488	BP	regulation of mRNA stability	8	Q15717,Q14103,Q13151
0.00479	34	3	GO:0048255	BP	mRNA stabilization	9	Q15717,Q14103,Q13151
0.0989	14	2	GO:0070935	BP	3'-UTR-mediated mRNA stabilization	10	Q15717,Q13151
8.59e-14	5882	28	GO:0080090	BP	regulation of primary metabolic process	4	Q15717,Q96EP5,Q9NQ88,P35637,Q86U42,Q9H307,O60828,P56270,P41223,O00151,Q9UQE7,Q07666,P22626,P18846,P09651,P30154,Q14103,O00422,O14979,Q9NRR5,P61326,P31943,P52597,Q92922,Q01844,O94992,Q99729,P62805
1	176	1	GO:0006109	BP	regulation of carbohydrate metabolic process	5	Q9NQ88
0.329	2653	9	GO:0051246	BP	regulation of protein metabolic process	5	Q15717,Q07666,P22626,P30154,Q14103,Q9NRR5,P61326,Q92922,O94992
1	727	2	GO:0030162	BP	regulation of proteolysis	6	Q9NRR5,Q92922
2.68e-09	4292	21	GO:0009889	BP	regulation of biosynthetic process	4	Q15717,P35637,Q9H307,O60828,P56270,P41223,O00151,Q9UQE7,Q07666,P22626,P18846,P09651,Q14103,O00422,O14979,P61326,Q92922,Q01844,O94992,Q99729,P62805
9.26e-10	4061	21	GO:0010556	BP	regulation of macromolecule biosynthetic process	5	Q15717,P35637,Q9H307,O60828,P56270,P41223,O00151,Q9UQE7,Q07666,P22626,P18846,P09651,Q14103,O00422,O14979,P61326,Q92922,Q01844,O94992,Q99729,P62805
1	694	3	GO:0009894	BP	regulation of catabolic process	4	Q9NQ88,Q9NRR5,Q92922
1	45	1	GO:0043470	BP	regulation of carbohydrate catabolic process	5	Q9NQ88
1	404	2	GO:0042176	BP	regulation of protein catabolic process	5	Q9NRR5,Q92922
1	12	1	GO:0043455	BP	regulation of secondary metabolic process	4	Q9NQ88
0.00162	2744	12	GO:0009892	BP	negative regulation of metabolic process	4	Q9NQ88,Q9UQE7,Q07666,P22626,P09651,Q14103,O00422,Q9NRR5,Q92922,O94992,Q99729,P62805
1	55	1	GO:0045912	BP	negative regulation of carbohydrate metabolic process	5	Q9NQ88
0.0301	2468	10	GO:0010605	BP	negative regulation of macromolecule metabolic process	5	Q9UQE7,Q07666,P22626,P09651,Q14103,O00422,Q92922,O94992,Q99729,P62805
0.364	1568	7	GO:0010629	BP	negative regulation of gene expression	6	Q07666,P22626,Q14103,O00422,O94992,Q99729,P62805
1	166	2	GO:0045814	BP	negative regulation of gene expression, epigenetic	7	O00422,P62805
1	244	2	GO:0016458	BP	gene silencing	7	P22626,P62805
1	149	2	GO:0031047	BP	gene silencing by RNA	8	P22626,P62805
1	25	1	GO:0070918	BP	production of small RNA involved in gene silencing by RNA	9	P22626
1	48	1	GO:0016441	BP	posttranscriptional gene silencing	8	P22626
1	48	1	GO:0035194	BP	posttranscriptional gene silencing by RNA	9	P22626
1	1126	4	GO:0051248	BP	negative regulation of protein metabolic process	6	P22626,Q14103,Q92922,O94992
1	233	3	GO:0009895	BP	negative regulation of catabolic process	5	Q9NQ88,Q9NRR5,Q92922
1	138	1	GO:0042177	BP	negative regulation of protein catabolic process	6	Q92922
0.00511	1559	9	GO:0009890	BP	negative regulation of biosynthetic process	5	Q9UQE7,Q07666,P22626,P09651,Q14103,O00422,O94992,Q99729,P62805
0.00325	1475	9	GO:0010558	BP	negative regulation of macromolecule biosynthetic process	6	Q9UQE7,Q07666,P22626,P09651,Q14103,O00422,O94992,Q99729,P62805
8.93e-15	4346	26	GO:0051171	BP	regulation of nitrogen compound metabolic process	4	Q15717,Q96EP5,Q9NQ88,P35637,Q86U42,Q9H307,O60828,P56270,P41223,O00151,Q9UQE7,Q07666,P22626,P18846,P09651,Q14103,O00422,O14979,P61326,P31943,P52597,Q92922,Q01844,O94992,Q99729,P62805
0.00052	1564	10	GO:0051172	BP	negative regulation of nitrogen compound metabolic process	5	Q9NQ88,Q9UQE7,Q07666,P22626,P09651,Q14103,O00422,O94992,Q99729,P62805
1	2378	3	GO:0050790	BP	regulation of catalytic activity	4	Q9NQ88,P30154,O94992
1	1286	1	GO:0051336	BP	regulation of hydrolase activity	5	P30154
1	1058	2	GO:0051338	BP	regulation of transferase activity	5	Q9NQ88,O94992
1	873	1	GO:0043086	BP	negative regulation of catalytic activity	5	O94992
1	372	1	GO:0051348	BP	negative regulation of transferase activity	6	O94992
3e-10	10414	31	GO:0050794	BP	regulation of cellular process	3	Q15717,Q96EP5,Q9NQ88,P35637,P52272,Q86U42,Q9H307,O60828,P56270,P41223,O00151,Q9UQE7,Q07666,P22626,P09496,P18846,P09651,P30154,Q14103,O00422,O14979,Q9NRR5,P61326,P30533,P31943,P52597,Q92922,Q01844,O94992,Q99729,P62805
1	57	1	GO:0044068	BP	modulation by symbiont of host cellular process	4	Q86U42
1	54	1	GO:0019054	BP	modulation by virus of host process	5	Q86U42
1	3	1	GO:0039656	BP	modulation by virus of host gene expression	6	Q86U42
1	650	2	GO:0080135	BP	regulation of cellular response to stress	4	Q9NQ88,Q9NRR5
1	149	1	GO:2001020	BP	regulation of response to DNA damage stimulus	5	Q9NQ88
1	1	1	GO:1902145	BP	regulation of response to cell cycle checkpoint signaling	4	Q9NQ88
1	1	1	GO:1902151	BP	regulation of response to DNA integrity checkpoint signaling	5	Q9NQ88
1	1	1	GO:1902153	BP	regulation of response to DNA damage checkpoint signaling	6	Q9NQ88
0.00514	4275	14	GO:0048523	BP	negative regulation of cellular process	4	Q9NQ88,Q9UQE7,Q07666,P22626,P09496,P09651,Q14103,O00422,Q9NRR5,P30533,Q92922,O94992,Q99729,P62805
1	2207	5	GO:0051128	BP	regulation of cellular component organization	4	Q9NQ88,O60828,P18846,P09651,Q9NRR5
1	629	3	GO:0051129	BP	negative regulation of cellular component organization	5	Q9NQ88,P09651,Q9NRR5
1	1083	3	GO:0033043	BP	regulation of organelle organization	5	Q9NQ88,P09651,Q9NRR5
1	324	3	GO:0010639	BP	negative regulation of organelle organization	6	Q9NQ88,P09651,Q9NRR5
1	290	1	GO:0033044	BP	regulation of chromosome organization	6	P09651
1	124	1	GO:2001251	BP	negative regulation of chromosome organization	7	P09651
1	213	1	GO:0010821	BP	regulation of mitochondrion organization	6	Q9NQ88
1	42	1	GO:0010823	BP	negative regulation of mitochondrion organization	7	Q9NQ88
1	38	1	GO:0044088	BP	regulation of vacuole organization	6	Q9NRR5
1	528	2	GO:0031344	BP	regulation of cell projection organization	5	O60828,P18846
1	516	1	GO:0022604	BP	regulation of cell morphogenesis	5	O60828
1	1270	2	GO:0060341	BP	regulation of cellular localization	4	P52272,Q07666
1	549	1	GO:1903827	BP	regulation of cellular protein localization	5	P52272
1	215	1	GO:1900180	BP	regulation of protein localization to nucleus	6	P52272
1	618	1	GO:0032386	BP	regulation of intracellular transport	5	Q07666
1	458	1	GO:1903649	BP	regulation of cytoplasmic transport	6	Q07666
1	217	1	GO:0046822	BP	regulation of nucleocytoplasmic transport	7	Q07666
1	9	1	GO:0046831	BP	regulation of RNA export from nucleus	8	Q07666
1.23e-13	5964	28	GO:0031323	BP	regulation of cellular metabolic process	4	Q15717,Q96EP5,Q9NQ88,P35637,Q86U42,Q9H307,O60828,P56270,P41223,O00151,Q9UQE7,Q07666,P22626,P18846,P09651,P30154,Q14103,O00422,O14979,Q9NRR5,P61326,P31943,P52597,Q92922,Q01844,O94992,Q99729,P62805
1	52	1	GO:0051193	BP	regulation of cofactor metabolic process	5	Q9NQ88
1	52	1	GO:0051196	BP	regulation of coenzyme metabolic process	6	Q9NQ88
0.000625	354	6	GO:0034248	BP	regulation of cellular amide metabolic process	5	Q15717,Q9NQ88,Q07666,P22626,Q14103,P61326
2.2e-09	4248	21	GO:0031326	BP	regulation of cellular biosynthetic process	5	Q15717,P35637,Q9H307,O60828,P56270,P41223,O00151,Q9UQE7,Q07666,P22626,P18846,P09651,Q14103,O00422,O14979,P61326,Q92922,Q01844,O94992,Q99729,P62805
6.08e-09	3949	20	GO:2000112	BP	regulation of cellular macromolecule biosynthetic process	6	Q15717,Q9H307,O60828,P56270,P41223,O00151,Q9UQE7,Q07666,P22626,P18846,P09651,Q14103,O00422,O14979,P61326,Q92922,Q01844,O94992,Q99729,P62805
1	584	3	GO:0031329	BP	regulation of cellular catabolic process	5	Q9NQ88,Q9NRR5,Q92922
1	198	2	GO:0010506	BP	regulation of autophagy	6	Q9NQ88,Q9NRR5
1	166	1	GO:0010675	BP	regulation of cellular carbohydrate metabolic process	5	Q9NQ88
1	45	1	GO:0043471	BP	regulation of cellular carbohydrate catabolic process	6	Q9NQ88
1	109	1	GO:0010906	BP	regulation of glucose metabolic process	6	Q9NQ88
2.57e-14	4046	25	GO:0019219	BP	regulation of nucleobase-containing compound metabolic process	5	Q96EP5,Q9NQ88,P35637,Q86U42,Q9H307,O60828,P56270,P41223,O00151,Q9UQE7,Q07666,P22626,P18846,P09651,Q14103,O00422,O14979,P61326,P31943,P52597,Q92922,Q01844,O94992,Q99729,P62805
1	52	1	GO:0009118	BP	regulation of nucleoside metabolic process	6	Q9NQ88
0.27	341	4	GO:0051052	BP	regulation of DNA metabolic process	6	Q9NQ88,Q9UQE7,P18846,P09651
0.482	158	3	GO:0006275	BP	regulation of DNA replication	7	Q9UQE7,P18846,P09651
1	35	1	GO:0090329	BP	regulation of DNA-dependent DNA replication	8	Q9UQE7
1	78	1	GO:0006282	BP	regulation of DNA repair	7	Q9NQ88
1	67	1	GO:0032204	BP	regulation of telomere maintenance	7	P09651
1	50	1	GO:1904356	BP	regulation of telomere maintenance via telomere lengthening	8	P09651
1	45	1	GO:0032210	BP	regulation of telomere maintenance via telomerase	9	P09651
1.3e-11	3720	22	GO:0051252	BP	regulation of RNA metabolic process	6	Q96EP5,P35637,Q86U42,Q9H307,O60828,P56270,P41223,O00151,Q07666,P22626,P18846,Q14103,O00422,O14979,P61326,P31943,P52597,Q92922,Q01844,O94992,Q99729,P62805
5.8e-05	114	5	GO:1903311	BP	regulation of mRNA metabolic process	7	Q96EP5,Q86U42,P22626,O00422,P61326
2.85e-05	99	5	GO:0050684	BP	regulation of mRNA processing	8	Q96EP5,Q86U42,P22626,O00422,P61326
1	2	1	GO:0046778	BP	modification by virus of host mRNA processing	9	Q86U42
1.93e-09	94	7	GO:0043484	BP	regulation of RNA splicing	7	Q96EP5,O60828,P22626,O00422,P61326,P31943,P52597
0.000279	60	4	GO:0048024	BP	regulation of mRNA splicing, via spliceosome	8	Q96EP5,P22626,O00422,P61326
0.501	31	2	GO:0000381	BP	regulation of alternative mRNA splicing, via spliceosome	9	O00422,P61326
1.4e-06	3620	17	GO:2001141	BP	regulation of RNA biosynthetic process	7	P35637,Q9H307,O60828,P56270,P41223,O00151,Q07666,P22626,P18846,Q14103,O00422,O14979,Q92922,Q01844,O94992,Q99729,P62805
1.29e-06	3601	17	GO:1903506	BP	regulation of nucleic acid-templated transcription	8	P35637,Q9H307,O60828,P56270,P41223,O00151,Q07666,P22626,P18846,Q14103,O00422,O14979,Q92922,Q01844,O94992,Q99729,P62805
1.05e-05	3581	16	GO:0006355	BP	regulation of transcription, DNA-templated	9	Q9H307,O60828,P56270,P41223,O00151,Q07666,P22626,P18846,Q14103,O00422,O14979,Q92922,Q01844,O94992,Q99729,P62805
0.136	1821	8	GO:0006357	BP	regulation of transcription from RNA polymerase II promoter	10	P56270,P41223,P22626,P18846,O00422,Q92922,O94992,Q99729
1	372	1	GO:0051090	BP	regulation of sequence-specific DNA binding transcription factor activity	10	P41223
1	92	1	GO:0043467	BP	regulation of generation of precursor metabolites and energy	5	Q9NQ88
1	4	1	GO:0043465	BP	regulation of fermentation	6	Q9NQ88
1	1758	3	GO:0051174	BP	regulation of phosphorus metabolic process	5	Q9NQ88,P30154,O94992
1	1745	3	GO:0019220	BP	regulation of phosphate metabolic process	6	Q9NQ88,P30154,O94992
1	212	1	GO:0006140	BP	regulation of nucleotide metabolic process	7	Q9NQ88
1	206	1	GO:1900542	BP	regulation of purine nucleotide metabolic process	8	Q9NQ88
1	52	1	GO:1903578	BP	regulation of ATP metabolic process	9	Q9NQ88
1	39	1	GO:0030811	BP	regulation of nucleotide catabolic process	8	Q9NQ88
1	7	1	GO:0033121	BP	regulation of purine nucleotide catabolic process	9	Q9NQ88
1	3	1	GO:1902688	BP	regulation of NAD metabolic process	8	Q9NQ88
1	3	1	GO:1904023	BP	regulation of glucose catabolic process to lactate via pyruvate	9	Q9NQ88
1	7	1	GO:1902031	BP	regulation of NADP metabolic process	8	Q9NQ88
1	5	1	GO:0043456	BP	regulation of pentose-phosphate shunt	9	Q9NQ88
1	161	1	GO:0035303	BP	regulation of dephosphorylation	7	P30154
1	1506	2	GO:0042325	BP	regulation of phosphorylation	7	Q9NQ88,O94992
1	933	2	GO:0043549	BP	regulation of kinase activity	8	Q9NQ88,O94992
1	11	1	GO:1903299	BP	regulation of hexokinase activity	9	Q9NQ88
1	34	1	GO:0006110	BP	regulation of glycolytic process	8	Q9NQ88
1	159	1	GO:2000377	BP	regulation of reactive oxygen species metabolic process	5	Q9NQ88
0.000462	2437	12	GO:0031324	BP	negative regulation of cellular metabolic process	5	Q9NQ88,Q9UQE7,Q07666,P22626,P09651,Q14103,O00422,Q9NRR5,Q92922,O94992,Q99729,P62805
1	13	1	GO:0051195	BP	negative regulation of cofactor metabolic process	6	Q9NQ88
1	13	1	GO:0051198	BP	negative regulation of coenzyme metabolic process	7	Q9NQ88
1	552	2	GO:0010563	BP	negative regulation of phosphorus metabolic process	6	Q9NQ88,O94992
1	552	2	GO:0045936	BP	negative regulation of phosphate metabolic process	7	Q9NQ88,O94992
1	427	2	GO:0042326	BP	negative regulation of phosphorylation	8	Q9NQ88,O94992
1	253	1	GO:0033673	BP	negative regulation of kinase activity	9	O94992
0.753	184	3	GO:0031330	BP	negative regulation of cellular catabolic process	6	Q9NQ88,Q9NRR5,Q92922
1	51	2	GO:0010507	BP	negative regulation of autophagy	7	Q9NQ88,Q9NRR5
1	48	1	GO:0010677	BP	negative regulation of cellular carbohydrate metabolic process	6	Q9NQ88
0.00453	1536	9	GO:0031327	BP	negative regulation of cellular biosynthetic process	6	Q9UQE7,Q07666,P22626,P09651,Q14103,O00422,O94992,Q99729,P62805
0.0194	1384	8	GO:2000113	BP	negative regulation of cellular macromolecule biosynthetic process	7	Q9UQE7,Q07666,P22626,P09651,Q14103,O94992,Q99729,P62805
0.00273	1444	9	GO:0045934	BP	negative regulation of nucleobase-containing compound metabolic process	6	Q9NQ88,Q9UQE7,Q07666,P22626,P09651,O00422,O94992,Q99729,P62805
1	21	1	GO:0045978	BP	negative regulation of nucleoside metabolic process	7	Q9NQ88
0.937	1307	6	GO:0051253	BP	negative regulation of RNA metabolic process	7	Q07666,P22626,O00422,O94992,Q99729,P62805
0.716	37	2	GO:1903312	BP	negative regulation of mRNA metabolic process	8	P22626,O00422
0.534	32	2	GO:0050686	BP	negative regulation of mRNA processing	9	P22626,O00422
0.351	26	2	GO:0033119	BP	negative regulation of RNA splicing	8	P22626,O00422
0.228	21	2	GO:0048025	BP	negative regulation of mRNA splicing, via spliceosome	9	P22626,O00422
0.793	1266	6	GO:1902679	BP	negative regulation of RNA biosynthetic process	8	Q07666,P22626,O00422,O94992,Q99729,P62805
0.741	1250	6	GO:1903507	BP	negative regulation of nucleic acid-templated transcription	9	Q07666,P22626,O00422,O94992,Q99729,P62805
1	1206	5	GO:0045892	BP	negative regulation of transcription, DNA-templated	10	Q07666,P22626,O94992,Q99729,P62805
1	750	3	GO:0000122	BP	negative regulation of transcription from RNA polymerase II promoter	11	P22626,O94992,Q99729
1	118	1	GO:0006342	BP	chromatin silencing	11	P62805
1	43	1	GO:0000183	BP	chromatin silencing at rDNA	12	P62805
1	111	2	GO:0051053	BP	negative regulation of DNA metabolic process	7	Q9UQE7,P09651
1	55	2	GO:0008156	BP	negative regulation of DNA replication	8	Q9UQE7,P09651
1	16	1	GO:2000104	BP	negative regulation of DNA-dependent DNA replication	9	Q9UQE7
1	26	1	GO:0032205	BP	negative regulation of telomere maintenance	8	P09651
1	17	1	GO:1904357	BP	negative regulation of telomere maintenance via telomere lengthening	9	P09651
1	12	1	GO:0032211	BP	negative regulation of telomere maintenance via telomerase	10	P09651
1	67	1	GO:0045980	BP	negative regulation of nucleotide metabolic process	7	Q9NQ88
1	65	1	GO:1900543	BP	negative regulation of purine nucleotide metabolic process	8	Q9NQ88
1	21	1	GO:1903579	BP	negative regulation of ATP metabolic process	9	Q9NQ88
1	16	1	GO:0030812	BP	negative regulation of nucleotide catabolic process	8	Q9NQ88
1	4	1	GO:0033122	BP	negative regulation of purine nucleotide catabolic process	9	Q9NQ88
1	12	1	GO:0045820	BP	negative regulation of glycolytic process	9	Q9NQ88
1	2	1	GO:1902689	BP	negative regulation of NAD metabolic process	8	Q9NQ88
1	137	2	GO:0034249	BP	negative regulation of cellular amide metabolic process	6	P22626,Q14103
1	42	1	GO:2000378	BP	negative regulation of reactive oxygen species metabolic process	6	Q9NQ88
1	3	1	GO:1901003	BP	negative regulation of fermentation	6	Q9NQ88
1	2	1	GO:1904024	BP	negative regulation of glucose catabolic process to lactate via pyruvate	7	Q9NQ88
0.196	2477	9	GO:0032268	BP	regulation of cellular protein metabolic process	5	Q15717,Q07666,P22626,P30154,Q14103,Q9NRR5,P61326,Q92922,O94992
1	1807	2	GO:0031399	BP	regulation of protein modification process	6	P30154,O94992
1	1412	1	GO:0001932	BP	regulation of protein phosphorylation	7	O94992
1	881	1	GO:0045859	BP	regulation of protein kinase activity	8	O94992
1	616	1	GO:0071900	BP	regulation of protein serine/threonine kinase activity	9	O94992
1	155	1	GO:0035304	BP	regulation of protein dephosphorylation	7	P30154
1	134	1	GO:0010921	BP	regulation of phosphatase activity	8	P30154
1	63	1	GO:0043666	BP	regulation of phosphoprotein phosphatase activity	9	P30154
1	24	1	GO:0034047	BP	regulation of protein phosphatase type 2A activity	10	P30154
1	278	2	GO:1903362	BP	regulation of cellular protein catabolic process	6	Q9NRR5,Q92922
1	258	2	GO:1903050	BP	regulation of proteolysis involved in cellular protein catabolic process	7	Q9NRR5,Q92922
1	195	2	GO:0061136	BP	regulation of proteasomal protein catabolic process	8	Q9NRR5,Q92922
1	163	2	GO:0032434	BP	regulation of proteasomal ubiquitin-dependent protein catabolic process	9	Q9NRR5,Q92922
1	1057	4	GO:0032269	BP	negative regulation of cellular protein metabolic process	6	P22626,Q14103,Q92922,O94992
1	644	1	GO:0031400	BP	negative regulation of protein modification process	7	O94992
1	389	1	GO:0001933	BP	negative regulation of protein phosphorylation	8	O94992
1	236	1	GO:0006469	BP	negative regulation of protein kinase activity	9	O94992
1	127	1	GO:0071901	BP	negative regulation of protein serine/threonine kinase activity	10	O94992
1	370	1	GO:0045861	BP	negative regulation of proteolysis	7	Q92922
1	90	1	GO:1903363	BP	negative regulation of cellular protein catabolic process	7	Q92922
1	85	1	GO:1903051	BP	negative regulation of proteolysis involved in cellular protein catabolic process	8	Q92922
1	78	1	GO:1901799	BP	negative regulation of proteasomal protein catabolic process	9	Q92922
1	73	1	GO:0032435	BP	negative regulation of proteasomal ubiquitin-dependent protein catabolic process	10	Q92922
0.0104	326	5	GO:0006417	BP	regulation of translation	6	Q15717,Q07666,P22626,Q14103,P61326
1	83	1	GO:0006446	BP	regulation of translational initiation	7	Q07666
1	4	1	GO:0097167	BP	circadian regulation of translation	7	Q14103
1	131	2	GO:0017148	BP	negative regulation of translation	7	P22626,Q14103
1	12	1	GO:0061157	BP	mRNA destabilization	8	Q14103
1	6	1	GO:0061158	BP	3'-UTR-mediated mRNA destabilization	9	Q14103
1	44	1	GO:0035195	BP	gene silencing by miRNA	8	P22626
1	24	1	GO:0035196	BP	production of miRNAs involved in gene silencing by miRNA	9	P22626
1	9	1	GO:0031053	BP	primary miRNA processing	10	P22626
1	3048	8	GO:0010646	BP	regulation of cell communication	4	Q9NQ88,P41223,Q07666,P09496,P30154,Q9NRR5,P30533,O94992
1	1232	4	GO:0010648	BP	negative regulation of cell communication	5	Q9NQ88,P09496,Q9NRR5,P30533
1	101	2	GO:0016241	BP	regulation of macroautophagy	5	Q9NQ88,Q9NRR5
0.25	22	2	GO:0016242	BP	negative regulation of macroautophagy	6	Q9NQ88,Q9NRR5
1	40	1	GO:1903146	BP	regulation of mitophagy	6	Q9NQ88
1	2	1	GO:1901524	BP	regulation of macromitophagy	7	Q9NQ88
1	5	1	GO:1903147	BP	negative regulation of mitophagy	7	Q9NQ88
1	2	1	GO:1901525	BP	negative regulation of macromitophagy	8	Q9NQ88
1	7	1	GO:1901096	BP	regulation of autophagosome maturation	6	Q9NRR5
1	4	1	GO:1901097	BP	negative regulation of autophagosome maturation	7	Q9NRR5
1	1040	3	GO:0051726	BP	regulation of cell cycle	4	Q9UQE7,Q07666,O94992
1	152	1	GO:1904029	BP	regulation of cyclin-dependent protein kinase activity	5	O94992
1	92	1	GO:0000079	BP	regulation of cyclin-dependent protein serine/threonine kinase activity	6	O94992
1	89	1	GO:1904030	BP	negative regulation of cyclin-dependent protein kinase activity	6	O94992
1	562	1	GO:0010564	BP	regulation of cell cycle process	5	Q9UQE7
1	8	1	GO:0032875	BP	regulation of DNA endoreduplication	6	Q9UQE7
1	500	3	GO:0045786	BP	negative regulation of cell cycle	5	Q9UQE7,Q07666,O94992
1	257	1	GO:0010948	BP	negative regulation of cell cycle process	6	Q9UQE7
1	5	1	GO:0032876	BP	negative regulation of DNA endoreduplication	7	Q9UQE7
1	254	1	GO:0007050	BP	cell cycle arrest	6	Q07666
1	30	1	GO:0045736	BP	negative regulation of cyclin-dependent protein serine/threonine kinase activity	6	O94992
1	1585	3	GO:0010941	BP	regulation of cell death	4	Q9NQ88,P30154,O00422
1	261	1	GO:1901214	BP	regulation of neuron death	5	Q9NQ88
1	1497	3	GO:0043067	BP	regulation of programmed cell death	5	Q9NQ88,P30154,O00422
1	1484	3	GO:0042981	BP	regulation of apoptotic process	6	Q9NQ88,P30154,O00422
1	47	1	GO:0010660	BP	regulation of muscle cell apoptotic process	7	Q9NQ88
1	24	1	GO:0010662	BP	regulation of striated muscle cell apoptotic process	8	Q9NQ88
1	21	1	GO:0010665	BP	regulation of cardiac muscle cell apoptotic process	9	Q9NQ88
1	947	1	GO:0060548	BP	negative regulation of cell death	5	Q9NQ88
1	175	1	GO:1901215	BP	negative regulation of neuron death	6	Q9NQ88
1	882	1	GO:0043069	BP	negative regulation of programmed cell death	6	Q9NQ88
1	5865	10	GO:0007165	BP	signal transduction	4	P41223,Q9UQE7,Q07666,P09496,P18846,P30154,P30533,Q92922,O94992,P62805
1	82	1	GO:0038034	BP	signal transduction in absence of ligand	5	P30154
1	308	1	GO:0030522	BP	intracellular receptor signaling pathway	5	P41223
1	126	1	GO:0030518	BP	intracellular steroid hormone receptor signaling pathway	6	P41223
1	63	1	GO:0030521	BP	androgen receptor signaling pathway	7	P41223
1	2832	5	GO:0007166	BP	cell surface receptor signaling pathway	5	Q07666,P09496,P18846,P30154,Q92922
1	1261	3	GO:0007167	BP	enzyme linked receptor protein signaling pathway	6	P09496,P18846,Q92922
1	945	3	GO:0007169	BP	transmembrane receptor protein tyrosine kinase signaling pathway	7	P09496,P18846,Q92922
1	375	1	GO:0038127	BP	ERBB signaling pathway	8	P09496
1	368	1	GO:0007173	BP	epidermal growth factor receptor signaling pathway	9	P09496
1	343	1	GO:0008286	BP	insulin receptor signaling pathway	8	Q92922
1	409	2	GO:0038179	BP	neurotrophin signaling pathway	6	P09496,P18846
1	406	2	GO:0048011	BP	neurotrophin TRK receptor signaling pathway	7	P09496,P18846
1	2763	3	GO:0035556	BP	intracellular signal transduction	5	P18846,O94992,P62805
1	176	1	GO:0072331	BP	signal transduction by p53 class mediator	6	O94992
1	942	1	GO:0007264	BP	small GTPase mediated signal transduction	6	P62805
1	288	1	GO:0031098	BP	stress-activated protein kinase signaling cascade	6	P18846
1	2677	6	GO:0009966	BP	regulation of signal transduction	5	P41223,Q07666,P09496,P30154,P30533,O94992
1	15	1	GO:1900115	BP	extracellular regulation of signal transduction	6	P30533
1	1674	1	GO:1902531	BP	regulation of intracellular signal transduction	6	O94992
1	52	1	GO:1901796	BP	regulation of signal transduction by p53 class mediator	7	O94992
1	123	1	GO:0010469	BP	regulation of receptor activity	6	P41223
1	45	1	GO:2000273	BP	positive regulation of receptor activity	7	P41223
1	62	1	GO:0033143	BP	regulation of intracellular steroid hormone receptor signaling pathway	6	P41223
1	23	1	GO:0060765	BP	regulation of androgen receptor signaling pathway	7	P41223
1	4	1	GO:2000823	BP	regulation of androgen receptor activity	8	P41223
1	81	1	GO:1901184	BP	regulation of ERBB signaling pathway	6	P09496
1	78	1	GO:0042058	BP	regulation of epidermal growth factor receptor signaling pathway	7	P09496
1	644	1	GO:0097190	BP	apoptotic signaling pathway	5	P30154
1	238	1	GO:0097191	BP	extrinsic apoptotic signaling pathway	6	P30154
1	82	1	GO:0097192	BP	extrinsic apoptotic signaling pathway in absence of ligand	7	P30154
1	391	1	GO:2001233	BP	regulation of apoptotic signaling pathway	6	P30154
1	161	1	GO:2001236	BP	regulation of extrinsic apoptotic signaling pathway	7	P30154
1	49	1	GO:2001239	BP	regulation of extrinsic apoptotic signaling pathway in absence of ligand	8	P30154
1	1105	2	GO:0009968	BP	negative regulation of signal transduction	5	P09496,P30533
1	15	1	GO:1900116	BP	extracellular negative regulation of signal transduction	6	P30533
1	43	1	GO:1901185	BP	negative regulation of ERBB signaling pathway	6	P09496
1	42	1	GO:0042059	BP	negative regulation of epidermal growth factor receptor signaling pathway	7	P09496
1	899	1	GO:0023014	BP	signal transduction by protein phosphorylation	5	P18846
1	869	1	GO:0000165	BP	MAPK cascade	6	P18846
1	264	1	GO:0051403	BP	stress-activated MAPK cascade	7	P18846
1	1531	4	GO:0045595	BP	regulation of cell differentiation	4	Q15717,O60828,P18846,P62805
1	854	3	GO:0060284	BP	regulation of cell development	5	Q15717,O60828,P18846
1	339	1	GO:0010769	BP	regulation of cell morphogenesis involved in differentiation	6	O60828
1	672	2	GO:0050767	BP	regulation of neurogenesis	6	O60828,P18846
1	558	2	GO:0045664	BP	regulation of neuron differentiation	7	O60828,P18846
1	405	2	GO:0010975	BP	regulation of neuron projection development	8	O60828,P18846
1	123	1	GO:0050773	BP	regulation of dendrite development	9	O60828
1	75	1	GO:0048814	BP	regulation of dendrite morphogenesis	10	O60828
1	119	1	GO:2000736	BP	regulation of stem cell differentiation	5	Q15717
1	23	1	GO:2000036	BP	regulation of stem cell population maintenance	6	Q15717
1	627	1	GO:0045596	BP	negative regulation of cell differentiation	5	P62805
1	1562	2	GO:0002682	BP	regulation of immune system process	3	P18846,P62805
1	374	1	GO:0002683	BP	negative regulation of immune system process	4	P62805
1	1024	1	GO:0050776	BP	regulation of immune response	4	P18846
1	405	1	GO:0045088	BP	regulation of innate immune response	5	P18846
1	670	1	GO:0002764	BP	immune response-regulating signaling pathway	5	P18846
1	327	1	GO:1903706	BP	regulation of hemopoiesis	4	P62805
1	132	1	GO:1903707	BP	negative regulation of hemopoiesis	5	P62805
1	44	1	GO:1901532	BP	regulation of hematopoietic progenitor cell differentiation	5	P62805
1	24	1	GO:1901533	BP	negative regulation of hematopoietic progenitor cell differentiation	6	P62805
1	186	1	GO:0045637	BP	regulation of myeloid cell differentiation	5	P62805
1	28	1	GO:0045652	BP	regulation of megakaryocyte differentiation	6	P62805
1	86	1	GO:0045638	BP	negative regulation of myeloid cell differentiation	6	P62805
1	18	1	GO:0045653	BP	negative regulation of megakaryocyte differentiation	7	P62805
1	104	1	GO:0042752	BP	regulation of circadian rhythm	3	Q14103
0.0225	5569	15	GO:0048518	BP	positive regulation of biological process	2	Q15717,Q96EP5,Q9NQ88,P52272,P41223,Q07666,P18846,P09651,P30154,Q14103,O00422,Q92922,O94992,Q99729,P62805
1	2072	6	GO:0048584	BP	positive regulation of response to stimulus	3	Q9NQ88,P41223,Q07666,P18846,P30154,O94992
1	440	1	GO:0031349	BP	positive regulation of defense response	4	P18846
1	1175	1	GO:0051094	BP	positive regulation of developmental process	3	P18846
1	207	1	GO:0032846	BP	positive regulation of homeostatic process	3	P09651
0.0183	4770	14	GO:0048522	BP	positive regulation of cellular process	3	Q15717,Q96EP5,Q9NQ88,P52272,P41223,Q07666,P18846,P09651,P30154,Q14103,O00422,Q92922,O94992,Q99729
1	1627	4	GO:0010647	BP	positive regulation of cell communication	4	P41223,Q07666,P30154,O94992
1	1142	2	GO:0051130	BP	positive regulation of cellular component organization	4	P18846,P09651
1	582	1	GO:0010638	BP	positive regulation of organelle organization	5	P09651
1	142	1	GO:2001252	BP	positive regulation of chromosome organization	6	P09651
1	301	1	GO:0031346	BP	positive regulation of cell projection organization	5	P18846
1	635	3	GO:0010942	BP	positive regulation of cell death	4	Q9NQ88,P30154,O00422
1	602	3	GO:0043068	BP	positive regulation of programmed cell death	5	Q9NQ88,P30154,O00422
1	597	3	GO:0043065	BP	positive regulation of apoptotic process	6	Q9NQ88,P30154,O00422
1	16	1	GO:0010661	BP	positive regulation of muscle cell apoptotic process	7	Q9NQ88
1	8	1	GO:0010663	BP	positive regulation of striated muscle cell apoptotic process	8	Q9NQ88
1	8	1	GO:0010666	BP	positive regulation of cardiac muscle cell apoptotic process	9	Q9NQ88
1	847	1	GO:0045597	BP	positive regulation of cell differentiation	4	P18846
1	483	1	GO:0010720	BP	positive regulation of cell development	5	P18846
1	65	1	GO:2001022	BP	positive regulation of response to DNA damage stimulus	4	Q9NQ88
1	1608	4	GO:0023056	BP	positive regulation of signaling	3	P41223,Q07666,P30154,O94992
1	1470	4	GO:0009967	BP	positive regulation of signal transduction	4	P41223,Q07666,P30154,O94992
1	14	1	GO:0033145	BP	positive regulation of intracellular steroid hormone receptor signaling pathway	5	P41223
1	1003	1	GO:1902533	BP	positive regulation of intracellular signal transduction	5	O94992
1	19	1	GO:1901798	BP	positive regulation of signal transduction by p53 class mediator	6	O94992
1	188	1	GO:2001235	BP	positive regulation of apoptotic signaling pathway	5	P30154
1	56	1	GO:2001238	BP	positive regulation of extrinsic apoptotic signaling pathway	6	P30154
1	14	1	GO:2001241	BP	positive regulation of extrinsic apoptotic signaling pathway in absence of ligand	7	P30154
1	1453	1	GO:0051240	BP	positive regulation of multicellular organismal process	3	P18846
1	444	1	GO:0051962	BP	positive regulation of nervous system development	4	P18846
1	382	1	GO:0050769	BP	positive regulation of neurogenesis	5	P18846
1	310	1	GO:0045666	BP	positive regulation of neuron differentiation	6	P18846
1	229	1	GO:0010976	BP	positive regulation of neuron projection development	7	P18846
1	955	1	GO:0002684	BP	positive regulation of immune system process	3	P18846
1	682	1	GO:0050778	BP	positive regulation of immune response	4	P18846
1	545	1	GO:0002253	BP	activation of immune response	5	P18846
1	495	1	GO:0002757	BP	immune response-activating signal transduction	6	P18846
1	337	1	GO:0045089	BP	positive regulation of innate immune response	5	P18846
1	292	1	GO:0002218	BP	activation of innate immune response	6	P18846
1	286	1	GO:0002758	BP	innate immune response-activating signal transduction	7	P18846
1	191	1	GO:0002221	BP	pattern recognition receptor signaling pathway	8	P18846
1	157	1	GO:0002224	BP	toll-like receptor signaling pathway	9	P18846
1	83	1	GO:0034134	BP	toll-like receptor 2 signaling pathway	10	P18846
1	84	1	GO:0002756	BP	MyD88-independent toll-like receptor signaling pathway	10	P18846
1	81	1	GO:0035666	BP	TRIF-dependent toll-like receptor signaling pathway	11	P18846
1	69	1	GO:0034166	BP	toll-like receptor 10 signaling pathway	10	P18846
1	76	1	GO:0038123	BP	toll-like receptor TLR1:TLR2 signaling pathway	10	P18846
1	76	1	GO:0038124	BP	toll-like receptor TLR6:TLR2 signaling pathway	10	P18846
1	80	1	GO:0034162	BP	toll-like receptor 9 signaling pathway	10	P18846
1	70	1	GO:0034146	BP	toll-like receptor 5 signaling pathway	10	P18846
1	117	1	GO:0034142	BP	toll-like receptor 4 signaling pathway	10	P18846
1	95	1	GO:0034138	BP	toll-like receptor 3 signaling pathway	10	P18846
1	88	1	GO:0002755	BP	MyD88-dependent toll-like receptor signaling pathway	10	P18846
0.166	3661	11	GO:0009893	BP	positive regulation of metabolic process	3	Q15717,Q96EP5,Q9NQ88,P41223,Q07666,P18846,P09651,Q14103,Q92922,Q99729,P62805
0.00213	1827	10	GO:0051173	BP	positive regulation of nitrogen compound metabolic process	4	Q15717,Q96EP5,Q9NQ88,P41223,Q07666,P18846,P09651,Q14103,Q92922,Q99729
1	76	1	GO:0045913	BP	positive regulation of carbohydrate metabolic process	4	Q9NQ88
0.146	1840	8	GO:0009891	BP	positive regulation of biosynthetic process	4	Q15717,P41223,Q07666,P18846,P09651,Q14103,Q92922,Q99729
0.0223	2940	11	GO:0010604	BP	positive regulation of macromolecule metabolic process	4	Q15717,Q96EP5,Q9NQ88,P41223,Q07666,P18846,P09651,Q14103,Q92922,Q99729,P62805
0.0154	1787	9	GO:0010628	BP	positive regulation of gene expression	5	Q15717,Q96EP5,P41223,Q07666,P18846,Q14103,Q92922,Q99729,P62805
1	78	1	GO:0045815	BP	positive regulation of gene expression, epigenetic	6	P62805
1	1592	3	GO:0051247	BP	positive regulation of protein metabolic process	5	Q15717,Q07666,Q14103
0.0772	1680	8	GO:0010557	BP	positive regulation of macromolecule biosynthetic process	5	Q15717,P41223,Q07666,P18846,P09651,Q14103,Q92922,Q99729
1	1563	1	GO:0043085	BP	positive regulation of catalytic activity	4	Q9NQ88
1	724	1	GO:0051347	BP	positive regulation of transferase activity	5	Q9NQ88
0.138	2955	10	GO:0031325	BP	positive regulation of cellular metabolic process	4	Q15717,Q96EP5,Q9NQ88,P41223,Q07666,P18846,P09651,Q14103,Q92922,Q99729
1	1178	1	GO:0010562	BP	positive regulation of phosphorus metabolic process	5	Q9NQ88
1	1178	1	GO:0045937	BP	positive regulation of phosphate metabolic process	6	Q9NQ88
1	1057	1	GO:0042327	BP	positive regulation of phosphorylation	7	Q9NQ88
1	647	1	GO:0033674	BP	positive regulation of kinase activity	8	Q9NQ88
0.096	1733	8	GO:0045935	BP	positive regulation of nucleobase-containing compound metabolic process	5	Q96EP5,Q9NQ88,P41223,P18846,P09651,Q14103,Q92922,Q99729
1	1516	6	GO:0051254	BP	positive regulation of RNA metabolic process	6	Q96EP5,P41223,P18846,Q14103,Q92922,Q99729
1	45	1	GO:1903313	BP	positive regulation of mRNA metabolic process	7	Q96EP5
1	34	1	GO:0050685	BP	positive regulation of mRNA processing	8	Q96EP5
1	27	1	GO:0033120	BP	positive regulation of RNA splicing	7	Q96EP5
1	16	1	GO:0048026	BP	positive regulation of mRNA splicing, via spliceosome	8	Q96EP5
0.706	180	3	GO:0051054	BP	positive regulation of DNA metabolic process	6	Q9NQ88,P18846,P09651
1	38	1	GO:0045739	BP	positive regulation of DNA repair	7	Q9NQ88
1	45	1	GO:0032206	BP	positive regulation of telomere maintenance	7	P09651
1	33	1	GO:1904358	BP	positive regulation of telomere maintenance via telomere lengthening	8	P09651
0.148	106	3	GO:0034250	BP	positive regulation of cellular amide metabolic process	5	Q15717,Q07666,Q14103
1	65	1	GO:0010676	BP	positive regulation of cellular carbohydrate metabolic process	5	Q9NQ88
1	6	1	GO:1903301	BP	positive regulation of hexokinase activity	6	Q9NQ88
0.129	1808	8	GO:0031328	BP	positive regulation of cellular biosynthetic process	5	Q15717,P41223,Q07666,P18846,P09651,Q14103,Q92922,Q99729
1	1478	5	GO:1902680	BP	positive regulation of RNA biosynthetic process	6	P41223,P18846,Q14103,Q92922,Q99729
1	1451	5	GO:1903508	BP	positive regulation of nucleic acid-templated transcription	7	P41223,P18846,Q14103,Q92922,Q99729
1	1451	5	GO:0045893	BP	positive regulation of transcription, DNA-templated	8	P41223,P18846,Q14103,Q92922,Q99729
1	1038	3	GO:0045944	BP	positive regulation of transcription from RNA polymerase II promoter	9	P41223,P18846,Q92922
1	228	1	GO:0051091	BP	positive regulation of sequence-specific DNA binding transcription factor activity	9	P41223
1	2	1	GO:2000825	BP	positive regulation of androgen receptor activity	10	P41223
1	90	2	GO:0045740	BP	positive regulation of DNA replication	6	P18846,P09651
1	32	1	GO:0032212	BP	positive regulation of telomere maintenance via telomerase	7	P09651
1	1495	3	GO:0032270	BP	positive regulation of cellular protein metabolic process	5	Q15717,Q07666,Q14103
0.0882	89	3	GO:0045727	BP	positive regulation of translation	6	Q15717,Q07666,Q14103
1	23	1	GO:0045948	BP	positive regulation of translational initiation	7	Q07666
1	927	2	GO:0051050	BP	positive regulation of transport	3	P52272,Q07666
1	3	1	GO:0032241	BP	positive regulation of nucleobase-containing compound transport	4	Q07666
1	362	1	GO:0032388	BP	positive regulation of intracellular transport	4	Q07666
1	272	1	GO:1903651	BP	positive regulation of cytoplasmic transport	5	Q07666
1	115	1	GO:0046824	BP	positive regulation of nucleocytoplasmic transport	6	Q07666
1	2	1	GO:0046833	BP	positive regulation of RNA export from nucleus	7	Q07666
1	444	1	GO:0051222	BP	positive regulation of protein transport	4	P52272
1	102	1	GO:1904591	BP	positive regulation of protein import	5	P52272
1	348	1	GO:1903829	BP	positive regulation of cellular protein localization	3	P52272
1	125	1	GO:1900182	BP	positive regulation of protein localization to nucleus	4	P52272
5.45e-20	18167	46	GO:0005575	CC	cellular_component	1	Q9UKD2,Q15717,Q96EP5,Q9NQ88,P35637,P52272,Q86U42,Q9H307,O00567,O60828,P56270,P16930,P41223,O00151,Q9UQE7,Q13895,Q07666,P22626,P09496,P18846,Q9ULA0,P55795,P25325,Q9BQ69,P09651,P30154,Q14103,O00422,O14979,P32754,Q9NRR5,P61326,P30533,P31943,P52597,P51991,Q01780,Q92922,Q13151,Q6P587,Q66PJ3,Q01844,O94992,P36776,Q99729,P62805
2.09e-05	9259	24	GO:0016020	CC	membrane	2	Q9UKD2,Q15717,Q9NQ88,P52272,Q9H307,O00567,Q13895,Q07666,P22626,P09496,P55795,P25325,P09651,P30154,P32754,Q9NRR5,P30533,P31943,P52597,Q01780,Q6P587,Q01844,P36776,P62805
1	81	1	GO:0048475	CC	coated membrane	3	P09496
1	2004	3	GO:0098805	CC	whole membrane	3	Q9NQ88,P09496,P30154
1	192	1	GO:0019867	CC	outer membrane	3	Q9NQ88
1	723	2	GO:0045202	CC	synapse	2	P35637,P25325
1	633	2	GO:0099512	CC	supramolecular fiber	2	Q9H307,Q13895
1	633	2	GO:0099513	CC	polymeric cytoskeletal fiber	3	Q9H307,Q13895
1	1146	3	GO:0030054	CC	cell junction	2	Q9H307,O00151,P25325
1	481	2	GO:0070161	CC	anchoring junction	3	Q9H307,O00151
1	463	1	GO:0005912	CC	adherens junction	4	O00151
1	392	1	GO:0030055	CC	cell-substrate junction	3	O00151
1	388	1	GO:0005924	CC	cell-substrate adherens junction	4	O00151
1	383	1	GO:0005925	CC	focal adhesion	5	O00151
1	385	1	GO:0005911	CC	cell-cell junction	3	Q9H307
1	23	1	GO:0030057	CC	desmosome	4	Q9H307
1	45	1	GO:0009295	CC	nucleoid	2	P36776
1.32e-15	4503	27	GO:0032991	CC	macromolecular complex	2	P35637,P52272,Q86U42,Q9H307,O00567,O60828,P41223,O00151,Q9UQE7,Q07666,P22626,P09496,P18846,P55795,P09651,Q14103,O00422,O14979,P61326,P31943,P52597,P51991,Q01780,Q92922,Q13151,Q99729,P62805
1.06e-19	717	18	GO:1990904	CC	ribonucleoprotein complex	3	P35637,P52272,Q86U42,Q9H307,O00567,O60828,P41223,P22626,P55795,P09651,Q14103,O14979,P61326,P31943,P52597,P51991,Q13151,Q99729
1	169	1	GO:0032993	CC	protein-DNA complex	3	P62805
0.227	3793	11	GO:0043234	CC	protein complex	3	O00151,Q9UQE7,Q07666,P09496,P18846,O00422,P61326,Q01780,Q92922,Q99729,P62805
1	1005	1	GO:1902494	CC	catalytic complex	4	O00422
1	112	1	GO:0044815	CC	DNA packaging complex	4	P62805
1	3	1	GO:0061574	CC	ASAP complex	4	O00422
1.57e-27	4250	35	GO:0031974	CC	membrane-enclosed lumen	2	Q9UKD2,Q15717,Q96EP5,P35637,P52272,Q86U42,Q9H307,O00567,O60828,Q9UQE7,Q13895,Q07666,P22626,P18846,Q9ULA0,P55795,P09651,Q14103,O00422,O14979,P61326,P30533,P31943,P52597,P51991,Q01780,Q92922,Q13151,Q6P587,Q66PJ3,Q01844,O94992,P36776,Q99729,P62805
8.66e-27	12901	46	GO:0043226	CC	organelle	2	Q9UKD2,Q15717,Q96EP5,Q9NQ88,P35637,P52272,Q86U42,Q9H307,O00567,O60828,P56270,P16930,P41223,O00151,Q9UQE7,Q13895,Q07666,P22626,P09496,P18846,Q9ULA0,P55795,P25325,Q9BQ69,P09651,P30154,Q14103,O00422,O14979,P32754,Q9NRR5,P61326,P30533,P31943,P52597,P51991,Q01780,Q92922,Q13151,Q6P587,Q66PJ3,Q01844,O94992,P36776,Q99729,P62805
0.000203	3828	15	GO:0043228	CC	non-membrane-bounded organelle	3	Q9UKD2,P52272,Q9H307,O00567,O60828,O00151,Q9UQE7,Q13895,P51991,Q01780,Q92922,Q66PJ3,Q01844,P36776,P62805
0.00563	3681	13	GO:0031982	CC	vesicle	3	P52272,P16930,P22626,P09496,P25325,P09651,P30154,Q14103,O14979,P32754,Q9NRR5,P30533,P62805
2.42e-26	11947	45	GO:0043227	CC	membrane-bounded organelle	3	Q9UKD2,Q15717,Q96EP5,Q9NQ88,P35637,P52272,Q86U42,Q9H307,O00567,O60828,P56270,P16930,P41223,Q9UQE7,Q13895,Q07666,P22626,P09496,P18846,Q9ULA0,P55795,P25325,Q9BQ69,P09651,P30154,Q14103,O00422,O14979,P32754,Q9NRR5,P61326,P30533,P31943,P52597,P51991,Q01780,Q92922,Q13151,Q6P587,Q66PJ3,Q01844,O94992,P36776,Q99729,P62805
0.127	3555	11	GO:0031988	CC	membrane-bounded vesicle	4	P52272,P16930,P22626,P09496,P25325,P09651,P30154,Q14103,O14979,P32754,P62805
1	401	2	GO:0031012	CC	extracellular matrix	2	P52272,Q9UQE7
1	16	1	GO:0019012	CC	virion	2	O14979
1.86e-20	16203	45	GO:0005623	CC	cell	2	Q9UKD2,Q15717,Q96EP5,Q9NQ88,P35637,P52272,Q86U42,Q9H307,O00567,O60828,P56270,P16930,P41223,O00151,Q9UQE7,Q13895,Q07666,P22626,P09496,P18846,Q9ULA0,P55795,P25325,Q9BQ69,P09651,Q14103,O00422,O14979,P32754,Q9NRR5,P61326,P30533,P31943,P52597,P51991,Q01780,Q92922,Q13151,Q6P587,Q66PJ3,Q01844,O94992,P36776,Q99729,P62805
0.0523	4527	13	GO:0005576	CC	extracellular region	2	P52272,P16930,Q9UQE7,P22626,Q9ULA0,P25325,P09651,P30154,Q14103,O14979,P32754,P30533,P62805
1.68e-20	16166	45	GO:0044464	CC	cell part	2	Q9UKD2,Q15717,Q96EP5,Q9NQ88,P35637,P52272,Q86U42,Q9H307,O00567,O60828,P56270,P16930,P41223,O00151,Q9UQE7,Q13895,Q07666,P22626,P09496,P18846,Q9ULA0,P55795,P25325,Q9BQ69,P09651,Q14103,O00422,O14979,P32754,Q9NRR5,P61326,P30533,P31943,P52597,P51991,Q01780,Q92922,Q13151,Q6P587,Q66PJ3,Q01844,O94992,P36776,Q99729,P62805
1	1115	4	GO:0031975	CC	envelope	3	Q9UKD2,Q9NQ88,P25325,Q6P587
1	1266	5	GO:0097458	CC	neuron part	3	P35637,O60828,P25325,P51991,Q92922
1	667	1	GO:0036477	CC	somatodendritic compartment	4	P35637
1	363	1	GO:0045177	CC	apical part of cell	3	Q13895
1	1809	5	GO:0042995	CC	cell projection	3	P35637,O60828,Q13895,P25325,P51991
1	971	2	GO:0044463	CC	cell projection part	4	P35637,O60828
1	485	1	GO:0005929	CC	cilium	4	O60828
1	210	1	GO:0072372	CC	primary cilium	5	O60828
1	947	4	GO:0043005	CC	neuron projection	4	P35637,O60828,P25325,P51991
1	122	1	GO:0044309	CC	neuron spine	5	P35637
1	458	1	GO:0030425	CC	dendrite	5	P35637
1	501	1	GO:0044297	CC	cell body	3	P35637
1	442	1	GO:0043025	CC	neuronal cell body	4	P35637
1	98	1	GO:0043204	CC	perikaryon	5	P35637
1	782	2	GO:0009986	CC	cell surface	3	P52272,P30533
3.49e-23	14067	45	GO:0005622	CC	intracellular	3	Q9UKD2,Q15717,Q96EP5,Q9NQ88,P35637,P52272,Q86U42,Q9H307,O00567,O60828,P56270,P16930,P41223,O00151,Q9UQE7,Q13895,Q07666,P22626,P09496,P18846,Q9ULA0,P55795,P25325,Q9BQ69,P09651,Q14103,O00422,O14979,P32754,Q9NRR5,P61326,P30533,P31943,P52597,P51991,Q01780,Q92922,Q13151,Q6P587,Q66PJ3,Q01844,O94992,P36776,Q99729,P62805
1.03e-23	13685	45	GO:0044424	CC	intracellular part	4	Q9UKD2,Q15717,Q96EP5,Q9NQ88,P35637,P52272,Q86U42,Q9H307,O00567,O60828,P56270,P16930,P41223,O00151,Q9UQE7,Q13895,Q07666,P22626,P09496,P18846,Q9ULA0,P55795,P25325,Q9BQ69,P09651,Q14103,O00422,O14979,P32754,Q9NRR5,P61326,P30533,P31943,P52597,P51991,Q01780,Q92922,Q13151,Q6P587,Q66PJ3,Q01844,O94992,P36776,Q99729,P62805
1	72	1	GO:0016234	CC	inclusion body	5	Q86U42
2.36e-15	10606	36	GO:0005737	CC	cytoplasm	5	Q9UKD2,Q15717,Q96EP5,Q9NQ88,P35637,Q86U42,O00567,O60828,P16930,O00151,Q9UQE7,Q13895,Q07666,P22626,P09496,Q9ULA0,P55795,P25325,Q9BQ69,P09651,Q14103,O00422,O14979,P32754,Q9NRR5,P61326,P30533,P31943,P52597,P51991,Q01780,Q6P587,Q01844,O94992,P36776,Q99729
0.11	8003	17	GO:0044444	CC	cytoplasmic part	6	Q15717,Q9NQ88,P35637,O60828,P16930,Q9UQE7,Q13895,P09496,P25325,Q9BQ69,Q14103,P32754,Q9NRR5,P61326,P30533,Q6P587,P36776
1	249	1	GO:0099568	CC	cytoplasmic region	7	O60828
1	21	1	GO:0032838	CC	cell projection cytoplasm	8	O60828
0.0633	3291	11	GO:0005829	CC	cytosol	7	Q15717,Q9NQ88,P16930,Q9UQE7,P09496,P25325,Q14103,P32754,Q9NRR5,P61326,Q6P587
1	653	3	GO:0048471	CC	perinuclear region of cytoplasm	7	P35637,Q13895,Q9NRR5
1.06e-24	11855	44	GO:0043229	CC	intracellular organelle	5	Q9UKD2,Q15717,Q96EP5,Q9NQ88,P35637,P52272,Q86U42,Q9H307,O00567,O60828,P56270,P41223,O00151,Q9UQE7,Q13895,Q07666,P22626,P09496,P18846,Q9ULA0,P55795,P25325,Q9BQ69,P09651,Q14103,O00422,O14979,P32754,Q9NRR5,P61326,P30533,P31943,P52597,P51991,Q01780,Q92922,Q13151,Q6P587,Q66PJ3,Q01844,O94992,P36776,Q99729,P62805
0.000203	3828	15	GO:0043232	CC	intracellular non-membrane-bounded organelle	6	Q9UKD2,P52272,Q9H307,O00567,O60828,O00151,Q9UQE7,Q13895,P51991,Q01780,Q92922,Q66PJ3,Q01844,P36776,P62805
1	1949	5	GO:0005856	CC	cytoskeleton	7	Q9H307,O60828,O00151,Q9UQE7,Q13895
1	238	1	GO:0045111	CC	intermediate filament cytoskeleton	8	Q9H307
1	1057	3	GO:0015630	CC	microtubule cytoskeleton	8	O60828,Q9UQE7,Q13895
1	848	4	GO:0005694	CC	chromosome	7	Q9UQE7,Q01780,Q92922,P62805
1	191	1	GO:0000793	CC	condensed chromosome	8	Q9UQE7
1	29	1	GO:0000803	CC	sex chromosome	8	Q92922
1	17	1	GO:0001741	CC	XY body	9	Q92922
9.17e-25	10791	43	GO:0043231	CC	intracellular membrane-bounded organelle	6	Q9UKD2,Q15717,Q96EP5,Q9NQ88,P35637,P52272,Q86U42,Q9H307,O00567,O60828,P56270,P41223,Q9UQE7,Q13895,Q07666,P22626,P09496,P18846,Q9ULA0,P55795,P25325,Q9BQ69,P09651,Q14103,O00422,O14979,P32754,Q9NRR5,P61326,P30533,P31943,P52597,P51991,Q01780,Q92922,Q13151,Q6P587,Q66PJ3,Q01844,O94992,P36776,Q99729,P62805
2.53e-26	6842	39	GO:0005634	CC	nucleus	7	Q9UKD2,Q15717,Q96EP5,Q9NQ88,P35637,P52272,Q86U42,Q9H307,O00567,O60828,P56270,P41223,Q9UQE7,Q13895,Q07666,P22626,P18846,Q9ULA0,P55795,Q9BQ69,P09651,Q14103,O00422,O14979,Q9NRR5,P61326,P31943,P52597,P51991,Q01780,Q92922,Q13151,Q6P587,Q66PJ3,Q01844,O94992,P36776,Q99729,P62805
1	604	2	GO:0005773	CC	vacuole	7	P09496,Q9NRR5
1	77	1	GO:0005776	CC	autophagosome	8	Q9NRR5
1	513	1	GO:0000323	CC	lytic vacuole	8	P09496
1	513	1	GO:0005764	CC	lysosome	9	P09496
1	1699	5	GO:0005739	CC	mitochondrion	7	Q9NQ88,P25325,Q9BQ69,Q6P587,P36776
1	1232	2	GO:0031410	CC	cytoplasmic vesicle	6	P09496,Q9NRR5
1	1124	1	GO:0016023	CC	cytoplasmic, membrane-bounded vesicle	7	P09496
1	220	1	GO:0030135	CC	coated vesicle	8	P09496
1	147	1	GO:0030136	CC	clathrin-coated vesicle	9	P09496
1	17	1	GO:0000178	CC	exosome (RNase complex)	5	Q01780
1.06e-19	717	18	GO:0030529	CC	intracellular ribonucleoprotein complex	5	P35637,P52272,Q86U42,Q9H307,O00567,O60828,P41223,P22626,P55795,P09651,Q14103,O14979,P61326,P31943,P52597,P51991,Q13151,Q99729
1	51	1	GO:0030684	CC	preribosome	6	O00567
1	33	1	GO:0032040	CC	small-subunit processome	7	O00567
1	20	1	GO:0005732	CC	small nucleolar ribonucleoprotein complex	6	O00567
1	8	1	GO:1990124	CC	messenger ribonucleoprotein complex	6	P51991
1	7	1	GO:0070761	CC	pre-snoRNP complex	6	O00567
1	36	1	GO:0005844	CC	polysome	6	P35637
1	146	2	GO:0035770	CC	ribonucleoprotein granule	6	O60828,P51991
1	139	1	GO:0036464	CC	cytoplasmic ribonucleoprotein granule	7	O60828
1	32	1	GO:0010494	CC	cytoplasmic stress granule	8	O60828
1	3	1	GO:0071598	CC	neuronal ribonucleoprotein granule	8	O60828
1	298	3	GO:0005667	CC	transcription factor complex	5	O00151,P18846,Q99729
1	3759	5	GO:0012505	CC	endomembrane system	3	Q9UKD2,P09496,P32754,Q9NRR5,P30533
1	1436	2	GO:0005794	CC	Golgi apparatus	4	P09496,P32754
1	779	1	GO:0005768	CC	endosome	4	P09496
1	16	1	GO:0036019	CC	endolysosome	5	P09496
1	1623	3	GO:0005783	CC	endoplasmic reticulum	4	P32754,Q9NRR5,P30533
1	69	1	GO:0005791	CC	rough endoplasmic reticulum	5	P30533
1	325	1	GO:0030133	CC	transport vesicle	4	P09496
1	5062	6	GO:0071944	CC	cell periphery	3	P52272,Q9H307,Q07666,P09496,P30533,Q01844
1	967	2	GO:0042175	CC	nuclear outer membrane-endoplasmic reticulum membrane network	3	P32754,Q9NRR5
1	4953	6	GO:0005886	CC	plasma membrane	3	P52272,Q9H307,Q07666,P09496,P30533,Q01844
1.26e-26	8104	41	GO:0044422	CC	organelle part	2	Q9UKD2,Q15717,Q96EP5,Q9NQ88,P35637,P52272,Q86U42,Q9H307,O00567,O60828,P41223,Q9UQE7,Q13895,Q07666,P22626,P09496,P18846,Q9ULA0,P55795,P25325,P09651,Q14103,O00422,O14979,P32754,Q9NRR5,P61326,P30533,P31943,P52597,P51991,Q01780,Q92922,Q13151,Q6P587,Q66PJ3,Q01844,O94992,P36776,Q99729,P62805
9.93e-28	4194	35	GO:0043233	CC	organelle lumen	3	Q9UKD2,Q15717,Q96EP5,P35637,P52272,Q86U42,Q9H307,O00567,O60828,Q9UQE7,Q13895,Q07666,P22626,P18846,Q9ULA0,P55795,P09651,Q14103,O00422,O14979,P61326,P30533,P31943,P52597,P51991,Q01780,Q92922,Q13151,Q6P587,Q66PJ3,Q01844,O94992,P36776,Q99729,P62805
4.19e-27	7885	41	GO:0044446	CC	intracellular organelle part	3	Q9UKD2,Q15717,Q96EP5,Q9NQ88,P35637,P52272,Q86U42,Q9H307,O00567,O60828,P41223,Q9UQE7,Q13895,Q07666,P22626,P09496,P18846,Q9ULA0,P55795,P25325,P09651,Q14103,O00422,O14979,P32754,Q9NRR5,P61326,P30533,P31943,P52597,P51991,Q01780,Q92922,Q13151,Q6P587,Q66PJ3,Q01844,O94992,P36776,Q99729,P62805
2.63e-29	3773	35	GO:0044428	CC	nuclear part	4	Q9UKD2,Q15717,Q96EP5,P35637,P52272,Q86U42,Q9H307,O00567,O60828,P41223,Q9UQE7,Q13895,Q07666,P22626,P18846,Q9ULA0,P55795,P09651,Q14103,O00422,O14979,P61326,P31943,P52597,P51991,Q01780,Q92922,Q13151,Q6P587,Q66PJ3,Q01844,O94992,P36776,Q99729,P62805
1	12	1	GO:0042405	CC	nuclear inclusion body	5	Q86U42
1	72	1	GO:0070603	CC	SWI/SNF superfamily-type complex	5	Q92922
1	24	1	GO:0090544	CC	BAF-type complex	6	Q92922
1	12	1	GO:0071564	CC	npBAF complex	7	Q92922
1	15	1	GO:0016514	CC	SWI/SNF complex	7	Q92922
1	14	1	GO:0071565	CC	nBAF complex	7	Q92922
1	11	1	GO:0035145	CC	exon-exon junction complex	5	P61326
1.82e-13	168	10	GO:0005681	CC	spliceosomal complex	5	P52272,Q9H307,P41223,P22626,P09651,O14979,P61326,P31943,P52597,P51991
8.03e-12	88	8	GO:0071013	CC	catalytic step 2 spliceosome	6	P52272,Q9H307,P22626,P09651,P61326,P31943,P52597,P51991
1	123	2	GO:0044798	CC	nuclear transcription factor complex	5	P18846,Q99729
1	96	2	GO:0090575	CC	RNA polymerase II transcription factor complex	6	P18846,Q99729
1	2	1	GO:1990590	CC	ATF1-ATF4 transcription factor complex	7	P18846
1	292	1	GO:0031984	CC	organelle subcompartment	4	P09496
6.37e-28	4140	35	GO:0070013	CC	intracellular organelle lumen	4	Q9UKD2,Q15717,Q96EP5,P35637,P52272,Q86U42,Q9H307,O00567,O60828,Q9UQE7,Q13895,Q07666,P22626,P18846,Q9ULA0,P55795,P09651,Q14103,O00422,O14979,P61326,P30533,P31943,P52597,P51991,Q01780,Q92922,Q13151,Q6P587,Q66PJ3,Q01844,O94992,P36776,Q99729,P62805
4.7e-29	3435	34	GO:0031981	CC	nuclear lumen	5	Q9UKD2,Q15717,Q96EP5,P35637,P52272,Q86U42,Q9H307,O00567,O60828,Q9UQE7,Q13895,Q07666,P22626,P18846,Q9ULA0,P55795,P09651,Q14103,O00422,O14979,P61326,P31943,P52597,P51991,Q01780,Q92922,Q13151,Q6P587,Q66PJ3,Q01844,O94992,P36776,Q99729,P62805
1	122	2	GO:0034399	CC	nuclear periphery	6	P52272,Q9UQE7
1	99	2	GO:0016363	CC	nuclear matrix	7	P52272,Q9UQE7
4.97e-27	2802	31	GO:0005654	CC	nucleoplasm	6	Q9UKD2,Q15717,Q96EP5,P35637,P52272,Q86U42,Q9H307,O00567,O60828,Q9UQE7,Q07666,P22626,P18846,Q9ULA0,P55795,P09651,Q14103,O00422,O14979,P61326,P31943,P52597,P51991,Q92922,Q13151,Q6P587,Q66PJ3,O94992,P36776,Q99729,P62805
0.0267	681	6	GO:0044451	CC	nucleoplasm part	7	P52272,Q9H307,O60828,O00422,P61326,Q66PJ3
0.000502	341	6	GO:0016604	CC	nuclear body	8	P52272,Q9H307,O60828,O00422,P61326,Q66PJ3
1	6	1	GO:0042382	CC	paraspeckles	9	P52272
0.000759	191	5	GO:0016607	CC	nuclear speck	9	Q9H307,O60828,O00422,P61326,Q66PJ3
1	49	1	GO:0000118	CC	histone deacetylase complex	8	O00422
0.00639	829	7	GO:0005730	CC	nucleolus	6	Q9UKD2,P52272,O00567,Q13895,Q01780,Q66PJ3,Q01844
1	60	1	GO:0044452	CC	nucleolar part	7	O00567
1	6	1	GO:0031428	CC	box C/D snoRNP complex	8	O00567
1	494	3	GO:0000228	CC	nuclear chromosome	6	Q9UQE7,Q92922,P62805
1	86	1	GO:0000794	CC	condensed nuclear chromosome	7	Q9UQE7
1	12	1	GO:0000176	CC	nuclear exosome (RNase complex)	6	Q01780
1	751	4	GO:0044427	CC	chromosomal part	4	Q9UQE7,Q01780,Q92922,P62805
1	301	2	GO:0098687	CC	chromosomal region	5	Q9UQE7,P62805
1	131	1	GO:0000781	CC	chromosome, telomeric region	6	P62805
1	174	1	GO:0000775	CC	chromosome, centromeric region	6	Q9UQE7
1	460	3	GO:0044454	CC	nuclear chromosome part	5	Q9UQE7,Q92922,P62805
1	36	1	GO:0000795	CC	synaptonemal complex	6	Q9UQE7
1	107	1	GO:0000784	CC	nuclear chromosome, telomeric region	6	P62805
1	13	1	GO:0000800	CC	lateral element	6	Q9UQE7
0.724	442	4	GO:0000785	CC	chromatin	5	Q9UQE7,Q01780,Q92922,P62805
1	21	1	GO:0035327	CC	transcriptionally active chromatin	6	Q01780
1	291	1	GO:0000790	CC	nuclear chromatin	6	Q92922
1	11	1	GO:0008278	CC	cohesin complex	5	Q9UQE7
1	6	1	GO:0000798	CC	nuclear cohesin complex	6	Q9UQE7
1	7	1	GO:0030893	CC	meiotic cohesin complex	6	Q9UQE7
1	6	1	GO:0034991	CC	nuclear meiotic cohesin complex	7	Q9UQE7
1	2	1	GO:0008280	CC	cohesin core heterodimer	5	Q9UQE7
1	106	1	GO:0000786	CC	nucleosome	5	P62805
1	1418	4	GO:0044430	CC	cytoskeletal part	4	Q9H307,O60828,Q9UQE7,Q13895
1	612	1	GO:0005815	CC	microtubule organizing center	5	O60828
1	476	1	GO:0005813	CC	centrosome	6	O60828
1	279	1	GO:0005819	CC	spindle	5	Q9UQE7
1	117	1	GO:0000922	CC	spindle pole	5	Q9UQE7
1	377	1	GO:0005874	CC	microtubule	5	Q13895
1	49	1	GO:0005881	CC	cytoplasmic microtubule	6	Q13895
1	196	1	GO:0005882	CC	intermediate filament	5	Q9H307
1	967	4	GO:0044429	CC	mitochondrial part	4	Q9NQ88,P25325,Q6P587,P36776
1	405	1	GO:0005759	CC	mitochondrial matrix	5	P36776
1	45	1	GO:0042645	CC	mitochondrial nucleoid	5	P36776
1	1133	3	GO:0044432	CC	endoplasmic reticulum part	4	P32754,Q9NRR5,P30533
1	203	1	GO:0005788	CC	endoplasmic reticulum lumen	5	P30533
1	2	1	GO:0048237	CC	rough endoplasmic reticulum lumen	6	P30533
1	390	1	GO:0044437	CC	vacuolar part	4	P09496
1	874	2	GO:0044431	CC	Golgi apparatus part	4	P09496,P32754
1	277	1	GO:0098791	CC	Golgi subcompartment	5	P09496
1	170	1	GO:0005802	CC	trans-Golgi network	6	P09496
1	79	1	GO:0005798	CC	Golgi-associated vesicle	5	P09496
1	27	1	GO:0030140	CC	trans-Golgi network transport vesicle	6	P09496
1	1109	4	GO:0031967	CC	organelle envelope	4	Q9UKD2,Q9NQ88,P25325,Q6P587
1	410	1	GO:0005635	CC	nuclear envelope	5	Q9UKD2
1	720	3	GO:0005740	CC	mitochondrial envelope	5	Q9NQ88,P25325,Q6P587
1	556	1	GO:0044433	CC	cytoplasmic vesicle part	4	P09496
1	420	1	GO:0044440	CC	endosomal part	4	P09496
1	326	1	GO:0044441	CC	ciliary part	3	O60828
1	26	1	GO:0097546	CC	ciliary base	4	O60828
1	3085	7	GO:0031090	CC	organelle membrane	3	Q9UKD2,Q9NQ88,P09496,P25325,P32754,Q9NRR5,Q6P587
1	2323	4	GO:0098588	CC	bounding membrane of organelle	4	Q9NQ88,P09496,P32754,Q9NRR5
1	184	1	GO:0031968	CC	organelle outer membrane	5	Q9NQ88
1	674	2	GO:0000139	CC	Golgi membrane	5	P09496,P32754
1	47	1	GO:0032588	CC	trans-Golgi network membrane	6	P09496
1	311	1	GO:0005774	CC	vacuolar membrane	5	P09496
1	267	1	GO:0098852	CC	lytic vacuole membrane	6	P09496
1	267	1	GO:0005765	CC	lysosomal membrane	7	P09496
1	390	1	GO:0010008	CC	endosome membrane	5	P09496
1	11	1	GO:0036020	CC	endolysosome membrane	6	P09496
1	489	1	GO:0012506	CC	vesicle membrane	4	P09496
1	470	1	GO:0030659	CC	cytoplasmic vesicle membrane	5	P09496
1	129	1	GO:0030662	CC	coated vesicle membrane	6	P09496
1	75	1	GO:0030665	CC	clathrin-coated vesicle membrane	7	P09496
1	142	1	GO:0030658	CC	transport vesicle membrane	6	P09496
1	47	1	GO:0030660	CC	Golgi-associated vesicle membrane	6	P09496
1	12	1	GO:0012510	CC	trans-Golgi network transport vesicle membrane	7	P09496
1	551	2	GO:0019866	CC	organelle inner membrane	4	P25325,Q6P587
1	281	1	GO:0031965	CC	nuclear membrane	4	Q9UKD2
1	679	3	GO:0031966	CC	mitochondrial membrane	4	Q9NQ88,P25325,Q6P587
1	496	2	GO:0005743	CC	mitochondrial inner membrane	5	P25325,Q6P587
1	161	1	GO:0005741	CC	mitochondrial outer membrane	5	Q9NQ88
1	131	1	GO:0044420	CC	extracellular matrix component	2	Q9UQE7
1	6915	7	GO:0044425	CC	membrane part	2	P52272,Q07666,P09496,P30154,P32754,Q9NRR5,P30533
1	1134	2	GO:0098589	CC	membrane region	3	P09496,P30154
1	276	1	GO:0098857	CC	membrane microdomain	4	P30154
1	276	1	GO:0045121	CC	membrane raft	5	P30154
1	62	1	GO:0005905	CC	coated pit	4	P09496
1	981	2	GO:0098796	CC	membrane protein complex	3	Q07666,P09496
1	81	1	GO:0030117	CC	membrane coat	4	P09496
1	36	1	GO:0030118	CC	clathrin coat	5	P09496
1	41	1	GO:0030120	CC	vesicle coat	5	P09496
1	19	1	GO:0030125	CC	clathrin vesicle coat	6	P09496
1	10	1	GO:0030130	CC	clathrin coat of trans-Golgi network vesicle	7	P09496
1	4	1	GO:0071439	CC	clathrin complex	4	P09496
1	2519	3	GO:0044459	CC	plasma membrane part	3	P52272,Q07666,P09496
1	473	2	GO:0098797	CC	plasma membrane protein complex	4	Q07666,P09496
1	1	1	GO:0070618	CC	Grb2-Sos complex	5	Q07666
1	12	1	GO:0030132	CC	clathrin coat of coated pit	5	P09496
1	5853	2	GO:0031224	CC	intrinsic component of membrane	3	P52272,P30533
1	5741	2	GO:0016021	CC	integral component of membrane	4	P52272,P30533
1	1574	1	GO:0031226	CC	intrinsic component of plasma membrane	4	P52272
1	1511	1	GO:0005887	CC	integral component of plasma membrane	5	P52272
1	946	2	GO:0005789	CC	endoplasmic reticulum membrane	3	P32754,Q9NRR5
1	16	1	GO:0044423	CC	virion part	2	O14979
1	12	1	GO:0019028	CC	viral capsid	3	O14979
1	10	1	GO:0019013	CC	viral nucleocapsid	3	O14979
1	570	1	GO:0044456	CC	synapse part	2	P35637
1	375	1	GO:0098794	CC	postsynapse	3	P35637
1	120	1	GO:0043197	CC	dendritic spine	4	P35637
1	9	1	GO:0044327	CC	dendritic spine head	3	P35637
0.0447	3795	12	GO:0044421	CC	extracellular region part	2	P52272,P16930,Q9UQE7,P22626,Q9ULA0,P25325,P09651,P30154,Q14103,O14979,P32754,P62805
1	1372	1	GO:0005615	CC	extracellular space	3	Q9ULA0
0.0861	2792	10	GO:0043230	CC	extracellular organelle	3	P52272,P16930,P22626,P25325,P09651,P30154,Q14103,O14979,P32754,P62805
0.0828	2779	10	GO:0065010	CC	extracellular membrane-bounded organelle	4	P52272,P16930,P22626,P25325,P09651,P30154,Q14103,O14979,P32754,P62805
0.0861	2792	10	GO:1903561	CC	extracellular vesicle	4	P52272,P16930,P22626,P25325,P09651,P30154,Q14103,O14979,P32754,P62805
0.0828	2779	10	GO:0070062	CC	extracellular exosome	5	P52272,P16930,P22626,P25325,P09651,P30154,Q14103,O14979,P32754,P62805
1	365	1	GO:0005578	CC	proteinaceous extracellular matrix	3	Q9UQE7
1	140	1	GO:0072562	CC	blood microparticle	3	Q9ULA0
1	101	1	GO:0005604	CC	basement membrane	3	Q9UQE7
2.41e-23	17039	47	GO:0003674	MF	molecular_function	1	Q9UKD2,Q15717,Q96EP5,Q9NQ88,P35637,P52272,Q86U42,Q9H307,O00567,O60828,P56270,P16930,P41223,O00151,Q9UQE7,Q13895,Q07666,P22626,P09496,P18846,Q9ULA0,P55795,P25325,Q9BQ69,P09651,P30154,Q14103,O00422,O14979,P32754,Q9NRR5,P61326,P30533,P31943,P52597,P51991,Q01780,Q92922,Q13151,Q6P587,Q7Z6I8,Q66PJ3,Q01844,O94992,P36776,Q99729,P62805
1	5528	11	GO:0003824	MF	catalytic activity	2	Q9NQ88,P16930,Q9UQE7,Q9ULA0,P25325,Q9BQ69,P32754,Q01780,Q6P587,P36776,P62805
1	176	1	GO:0016829	MF	lyase activity	3	Q6P587
1	50	1	GO:0016830	MF	carbon-carbon lyase activity	4	Q6P587
1	37	1	GO:0016831	MF	carboxy-lyase activity	5	Q6P587
1	4	1	GO:0008948	MF	oxaloacetate decarboxylase activity	6	Q6P587
1	44	1	GO:0032451	MF	demethylase activity	3	P62805
1	36	1	GO:0032452	MF	histone demethylase activity	4	P62805
1	16	1	GO:0035575	MF	histone demethylase activity (H4-K20 specific)	5	P62805
1	733	1	GO:0016491	MF	oxidoreductase activity	3	P32754
1	27	1	GO:0016701	MF	oxidoreductase activity, acting on single donors with incorporation of molecular oxygen	4	P32754
1	87	1	GO:0051213	MF	dioxygenase activity	4	P32754
1	26	1	GO:0016702	MF	oxidoreductase activity, acting on single donors with incorporation of molecular oxygen, incorporation of two atoms of oxygen	5	P32754
1	2	1	GO:0003868	MF	4-hydroxyphenylpyruvate dioxygenase activity	6	P32754
1	2126	1	GO:0016740	MF	transferase activity	3	P25325
1	63	1	GO:0016782	MF	transferase activity, transferring sulfur-containing groups	4	P25325
1	7	1	GO:0016783	MF	sulfurtransferase activity	5	P25325
1	3	1	GO:0004792	MF	thiosulfate sulfurtransferase activity	6	P25325
1	1	1	GO:0016784	MF	3-mercaptopyruvate sulfurtransferase activity	6	P25325
0.893	2403	8	GO:0016787	MF	hydrolase activity	3	Q9NQ88,P16930,Q9UQE7,Q9ULA0,Q9BQ69,Q01780,Q6P587,P36776
0.00328	3	2	GO:0016822	MF	hydrolase activity, acting on acid carbon-carbon bonds	4	P16930,Q6P587
0.00328	3	2	GO:0016823	MF	hydrolase activity, acting on acid carbon-carbon bonds, in ketonic substances	5	P16930,Q6P587
1	1	1	GO:0047621	MF	acylpyruvate hydrolase activity	6	Q6P587
1	1	1	GO:0018773	MF	acetylpyruvate hydrolase activity	6	Q6P587
1	1	1	GO:0004334	MF	fumarylacetoacetase activity	6	P16930
1	1	1	GO:0034545	MF	fumarylpyruvate hydrolase activity	6	Q6P587
1	34	1	GO:0019213	MF	deacetylase activity	4	Q9BQ69
1	703	2	GO:0016788	MF	hydrolase activity, acting on ester bonds	4	Q9NQ88,Q01780
1	358	1	GO:0042578	MF	phosphoric ester hydrolase activity	5	Q9NQ88
1	266	1	GO:0016791	MF	phosphatase activity	6	Q9NQ88
1	6	1	GO:0034416	MF	bisphosphoglycerate phosphatase activity	7	Q9NQ88
1	5	1	GO:0004083	MF	bisphosphoglycerate 2-phosphatase activity	8	Q9NQ88
1	11	1	GO:0019203	MF	carbohydrate phosphatase activity	7	Q9NQ88
1	10	1	GO:0050308	MF	sugar-phosphatase activity	8	Q9NQ88
1	5	1	GO:0004331	MF	fructose-2,6-bisphosphate 2-phosphatase activity	9	Q9NQ88
1	184	1	GO:0004518	MF	nuclease activity	5	Q01780
1	73	1	GO:0004527	MF	exonuclease activity	6	Q01780
1	46	1	GO:0008408	MF	3'-5' exonuclease activity	7	Q01780
1	82	1	GO:0004540	MF	ribonuclease activity	6	Q01780
1	26	1	GO:0004532	MF	exoribonuclease activity	7	Q01780
1	776	2	GO:0016817	MF	hydrolase activity, acting on acid anhydrides	4	Q9UQE7,P36776
1	773	2	GO:0016818	MF	hydrolase activity, acting on acid anhydrides, in phosphorus-containing anhydrides	5	Q9UQE7,P36776
1	770	2	GO:0016462	MF	pyrophosphatase activity	6	Q9UQE7,P36776
1	728	2	GO:0017111	MF	nucleoside-triphosphatase activity	7	Q9UQE7,P36776
1	402	1	GO:0016887	MF	ATPase activity	8	P36776
1	291	1	GO:0042623	MF	ATPase activity, coupled	9	P36776
1	137	1	GO:0003774	MF	motor activity	8	Q9UQE7
1	80	1	GO:0003777	MF	microtubule motor activity	9	Q9UQE7
1	189	1	GO:0017171	MF	serine hydrolase activity	4	P36776
1	130	1	GO:0016798	MF	hydrolase activity, acting on glycosyl bonds	4	Q9BQ69
1	627	2	GO:0008233	MF	peptidase activity	4	Q9ULA0,P36776
1	605	2	GO:0070011	MF	peptidase activity, acting on L-amino acid peptides	5	Q9ULA0,P36776
1	104	1	GO:0008238	MF	exopeptidase activity	6	Q9ULA0
1	40	1	GO:0004177	MF	aminopeptidase activity	7	Q9ULA0
1	186	1	GO:0008237	MF	metallopeptidase activity	6	Q9ULA0
1	408	1	GO:0004175	MF	endopeptidase activity	6	P36776
1	186	1	GO:0008236	MF	serine-type peptidase activity	6	P36776
1	161	1	GO:0004252	MF	serine-type endopeptidase activity	7	P36776
1	9	1	GO:0004176	MF	ATP-dependent peptidase activity	6	P36776
1	732	2	GO:0005198	MF	structural molecule activity	2	Q9H307,P09496
1	1937	1	GO:0060089	MF	molecular transducer activity	2	P30533
1	1655	1	GO:0004872	MF	receptor activity	3	P30533
1	63	1	GO:0038024	MF	cargo receptor activity	4	P30533
1	3	1	GO:0004873	MF	asialoglycoprotein receptor activity	5	P30533
1	1180	3	GO:0001071	MF	nucleic acid binding transcription factor activity	2	P56270,P41223,P18846
1	1180	3	GO:0003700	MF	transcription factor activity, sequence-specific DNA binding	3	P56270,P41223,P18846
1	623	2	GO:0000981	MF	RNA polymerase II transcription factor activity, sequence-specific DNA binding	4	P56270,P18846
1	98	1	GO:0003705	MF	transcription factor activity, RNA polymerase II distal enhancer sequence-specific binding	5	P18846
1	326	1	GO:0001228	MF	transcriptional activator activity, RNA polymerase II transcription regulatory region sequence-specific binding	5	P18846
1	1259	3	GO:0098772	MF	molecular function regulator	2	P30154,P30533,O94992
1	44	1	GO:0030545	MF	receptor regulator activity	3	P30533
1	12	1	GO:0030547	MF	receptor inhibitor activity	4	P30533
1	956	2	GO:0030234	MF	enzyme regulator activity	3	P30154,O94992
1	92	1	GO:0019208	MF	phosphatase regulator activity	4	P30154
1	80	1	GO:0019888	MF	protein phosphatase regulator activity	5	P30154
1	21	1	GO:0008601	MF	protein phosphatase type 2A regulator activity	6	P30154
1	388	1	GO:0004857	MF	enzyme inhibitor activity	4	O94992
1	185	1	GO:0019207	MF	kinase regulator activity	4	O94992
1	167	1	GO:0019887	MF	protein kinase regulator activity	5	O94992
1	28	1	GO:0016538	MF	cyclin-dependent protein serine/threonine kinase regulator activity	6	O94992
1	89	1	GO:0019210	MF	kinase inhibitor activity	5	O94992
1	86	1	GO:0004860	MF	protein kinase inhibitor activity	6	O94992
1	29	1	GO:0030291	MF	protein serine/threonine kinase inhibitor activity	7	O94992
1	12	1	GO:0004861	MF	cyclin-dependent protein serine/threonine kinase inhibitor activity	8	O94992
0.0115	587	6	GO:0000988	MF	transcription factor activity, protein binding	2	P35637,O60828,P41223,O00151,O00422,Q92922
0.0112	584	6	GO:0000989	MF	transcription factor activity, transcription factor binding	3	P35637,O60828,P41223,O00151,O00422,Q92922
0.00724	541	6	GO:0003712	MF	transcription cofactor activity	4	P35637,O60828,P41223,O00151,O00422,Q92922
1	221	1	GO:0003714	MF	transcription corepressor activity	5	O00422
0.00672	298	5	GO:0003713	MF	transcription coactivator activity	5	P35637,O60828,P41223,O00151,Q92922
1	54	1	GO:0030374	MF	ligand-dependent nuclear receptor transcription coactivator activity	6	P41223
1	1251	1	GO:0005215	MF	transporter activity	2	P51991
1	1057	1	GO:0022892	MF	substrate-specific transporter activity	3	P51991
1	972	1	GO:0022857	MF	transmembrane transporter activity	3	P51991
1	888	1	GO:0022891	MF	substrate-specific transmembrane transporter activity	4	P51991
1	22	1	GO:0022884	MF	macromolecule transmembrane transporter activity	5	P51991
1	29	1	GO:0015932	MF	nucleobase-containing compound transmembrane transporter activity	5	P51991
1	3	1	GO:0051032	MF	nucleic acid transmembrane transporter activity	6	P51991
1	3	1	GO:0051033	MF	RNA transmembrane transporter activity	7	P51991
5.8e-27	14275	47	GO:0005488	MF	binding	2	Q9UKD2,Q15717,Q96EP5,Q9NQ88,P35637,P52272,Q86U42,Q9H307,O00567,O60828,P56270,P16930,P41223,O00151,Q9UQE7,Q13895,Q07666,P22626,P09496,P18846,Q9ULA0,P55795,P25325,Q9BQ69,P09651,P30154,Q14103,O00422,O14979,P32754,Q9NRR5,P61326,P30533,P31943,P52597,P51991,Q01780,Q92922,Q13151,Q6P587,Q7Z6I8,Q66PJ3,Q01844,O94992,P36776,Q99729,P62805
1	1412	6	GO:0044877	MF	macromolecular complex binding	3	O60828,P56270,Q9UQE7,Q07666,P18846,Q14103
1	90	1	GO:0043021	MF	ribonucleoprotein complex binding	4	O60828
1	457	3	GO:0003682	MF	chromatin binding	4	P56270,Q9UQE7,Q14103
1	234	1	GO:1901681	MF	sulfur compound binding	3	P30533
1.64e-18	5944	32	GO:1901363	MF	heterocyclic compound binding	3	Q9UKD2,Q15717,Q96EP5,P35637,P52272,Q86U42,Q9H307,O00567,O60828,P56270,Q9UQE7,Q13895,Q07666,P22626,P18846,P55795,P09651,Q14103,O00422,O14979,P61326,P31943,P52597,P51991,Q01780,Q13151,Q66PJ3,Q01844,O94992,P36776,Q99729,P62805
1	2257	3	GO:0097367	MF	carbohydrate derivative binding	3	Q9UQE7,P30533,P36776
1	200	1	GO:0005539	MF	glycosaminoglycan binding	4	P30533
1	6148	11	GO:0043167	MF	ion binding	3	P35637,P56270,P16930,O00151,Q9UQE7,Q9ULA0,P32754,P30533,Q6P587,Q01844,P36776
1	2674	3	GO:0043168	MF	anion binding	4	Q9UQE7,P30533,P36776
1	155	1	GO:0008201	MF	heparin binding	5	P30533
1	4214	8	GO:0043169	MF	cation binding	4	P35637,P56270,P16930,O00151,Q9ULA0,P32754,Q6P587,Q01844
1	4140	8	GO:0046872	MF	metal ion binding	5	P35637,P56270,P16930,O00151,Q9ULA0,P32754,Q6P587,Q01844
1	1445	4	GO:0046914	MF	transition metal ion binding	6	P35637,O00151,Q9ULA0,Q01844
1	1194	4	GO:0008270	MF	zinc ion binding	7	P35637,O00151,Q9ULA0,Q01844
1	266	1	GO:0033218	MF	amide binding	3	P09496
1	242	1	GO:0042277	MF	peptide binding	4	P09496
1	167	1	GO:0060090	MF	binding, bridging	3	Q07666
1	74	1	GO:0035591	MF	signaling adaptor activity	4	Q07666
2.9e-23	10729	42	GO:0005515	MF	protein binding	3	Q9UKD2,Q15717,Q9NQ88,P35637,P52272,Q86U42,O00567,O60828,P56270,P16930,P41223,Q9UQE7,Q13895,Q07666,P22626,P09496,P18846,Q9ULA0,P55795,P25325,Q9BQ69,P09651,P30154,Q14103,O00422,O14979,Q9NRR5,P61326,P30533,P31943,P52597,P51991,Q01780,Q92922,Q13151,Q7Z6I8,Q66PJ3,Q01844,O94992,P36776,Q99729,P62805
1	57	1	GO:0030276	MF	clathrin binding	4	P09496
1	6	1	GO:0032050	MF	clathrin heavy chain binding	5	P09496
1	644	3	GO:0019904	MF	protein domain specific binding	4	P52272,Q07666,P62805
1	118	1	GO:0017124	MF	SH3 domain binding	5	Q07666
1	820	1	GO:0008092	MF	cytoskeletal protein binding	4	P35637
1	58	1	GO:0017022	MF	myosin binding	5	P35637
1	17	1	GO:0031489	MF	myosin V binding	6	P35637
1	102	1	GO:0051082	MF	unfolded protein binding	4	P30533
1	1724	6	GO:0019899	MF	enzyme binding	4	Q15717,O00567,Q14103,P30533,Q13151,P36776
1	610	2	GO:0019900	MF	kinase binding	5	Q15717,Q13151
1	543	2	GO:0019901	MF	protein kinase binding	6	Q15717,Q13151
1	4	1	GO:1990226	MF	histone methyltransferase binding	5	O00567
1	107	1	GO:0042826	MF	histone deacetylase binding	5	Q14103
1	6	1	GO:0035473	MF	lipase binding	5	P30533
1	12	1	GO:0070182	MF	DNA polymerase binding	5	P36776
1	538	3	GO:0008134	MF	transcription factor binding	4	P35637,Q14103,P52597
1	20	1	GO:0017025	MF	TBP-class protein binding	5	P52597
1	1491	3	GO:0005102	MF	receptor binding	4	P35637,P41223,P30533
1	177	2	GO:0051427	MF	hormone receptor binding	5	P35637,P41223
1	156	2	GO:0035257	MF	nuclear hormone receptor binding	6	P35637,P41223
1	84	1	GO:0035258	MF	steroid hormone receptor binding	7	P35637
1	39	1	GO:0030331	MF	estrogen receptor binding	8	P35637
1	30	1	GO:0046966	MF	thyroid hormone receptor binding	7	P35637
1	51	1	GO:0042974	MF	retinoic acid receptor binding	7	P35637
1	19	1	GO:0046965	MF	retinoid X receptor binding	8	P35637
1	23	1	GO:0070325	MF	lipoprotein particle receptor binding	5	P30533
1	18	1	GO:0050750	MF	low-density lipoprotein particle receptor binding	6	P30533
1	4	1	GO:0070326	MF	very-low-density lipoprotein particle receptor binding	6	P30533
1	39	1	GO:0035254	MF	glutamate receptor binding	5	P35637
1	24	1	GO:0035255	MF	ionotropic glutamate receptor binding	6	P35637
1	11	1	GO:0048019	MF	receptor antagonist activity	5	P30533
1	22	1	GO:0045502	MF	dynein binding	4	Q9UQE7
1	178	1	GO:0005516	MF	calmodulin binding	4	Q01844
1	1183	3	GO:0046983	MF	protein dimerization activity	4	Q9UQE7,P18846,P62805
1	483	3	GO:0046982	MF	protein heterodimerization activity	5	Q9UQE7,P18846,P62805
1	116	1	GO:0032182	MF	ubiquitin-like protein binding	4	Q9NRR5
1	97	1	GO:0043130	MF	ubiquitin binding	5	Q9NRR5
1	44	1	GO:0031593	MF	polyubiquitin binding	6	Q9NRR5
1	178	1	GO:0042393	MF	histone binding	4	P62805
1	103	1	GO:0047485	MF	protein N-terminus binding	4	Q92922
1	192	1	GO:0008022	MF	protein C-terminus binding	4	O60828
1	62	1	GO:0048306	MF	calcium-dependent protein binding	4	P52272
1	1222	5	GO:0042802	MF	identical protein binding	4	P35637,Q07666,P25325,Q9NRR5,Q01844
1	150	1	GO:0030674	MF	protein binding, bridging	4	Q07666
1	52	1	GO:0005070	MF	SH3/SH2 adaptor activity	5	Q07666
1	910	3	GO:0032403	MF	protein complex binding	4	Q9UQE7,Q07666,P18846
1	4	1	GO:0036033	MF	mediator complex binding	5	Q9UQE7
1	108	1	GO:0003823	MF	antigen binding	3	P52272
1	6	1	GO:1990405	MF	protein antigen binding	4	P52272
2.51e-18	6027	32	GO:0097159	MF	organic cyclic compound binding	3	Q9UKD2,Q15717,Q96EP5,P35637,P52272,Q86U42,Q9H307,O00567,O60828,P56270,Q9UQE7,Q13895,Q07666,P22626,P18846,P55795,P09651,Q14103,O00422,O14979,P61326,P31943,P52597,P51991,Q01780,Q13151,Q66PJ3,Q01844,O94992,P36776,Q99729,P62805
8.44e-12	2381	19	GO:1901265	MF	nucleoside phosphate binding	4	Q15717,Q96EP5,P35637,P52272,Q86U42,Q9UQE7,P22626,P55795,P09651,Q14103,O14979,P31943,P52597,P51991,Q01780,Q13151,Q01844,P36776,Q99729
1	1844	2	GO:0035639	MF	purine ribonucleoside triphosphate binding	5	Q9UQE7,P36776
2.84e-22	4026	31	GO:0003676	MF	nucleic acid binding	4	Q9UKD2,Q15717,Q96EP5,P35637,P52272,Q86U42,Q9H307,O00567,O60828,P56270,Q13895,Q07666,P22626,P18846,P55795,P09651,Q14103,O00422,O14979,P61326,P31943,P52597,P51991,Q01780,Q13151,Q66PJ3,Q01844,O94992,P36776,Q99729,P62805
1	799	3	GO:0001067	MF	regulatory region nucleic acid binding	5	P56270,P18846,P36776
0.000583	2491	12	GO:0003677	MF	DNA binding	5	P35637,Q9H307,O60828,P56270,Q07666,P22626,P18846,P09651,Q14103,O14979,P36776,P62805
1	98	1	GO:0043566	MF	structure-specific DNA binding	6	P36776
1	5	1	GO:0051880	MF	G-quadruplex DNA binding	7	P36776
0.00132	88	4	GO:0003697	MF	single-stranded DNA binding	6	P22626,P09651,O14979,P36776
1	752	4	GO:0003690	MF	double-stranded DNA binding	6	P56270,P18846,Q14103,O14979
0.266	1032	6	GO:0043565	MF	sequence-specific DNA binding	6	P56270,P22626,P18846,P09651,Q14103,P36776
1	679	3	GO:1990837	MF	sequence-specific double-stranded DNA binding	7	P56270,P18846,Q14103
1	8	1	GO:0003680	MF	AT DNA binding	8	Q14103
0.0392	9	2	GO:0098847	MF	sequence-specific single stranded DNA binding	7	P22626,P09651
0.00325	30	3	GO:0042162	MF	telomeric DNA binding	7	P22626,P09651,Q14103
0.0392	9	2	GO:0043047	MF	single-stranded telomeric DNA binding	8	P22626,P09651
1	7	1	GO:0098505	MF	G-rich strand telomeric DNA binding	9	P09651
1	798	3	GO:0000975	MF	regulatory region DNA binding	6	P56270,P18846,P36776
1	795	3	GO:0044212	MF	transcription regulatory region DNA binding	7	P56270,P18846,P36776
1	1	1	GO:0070362	MF	mitochondrial heavy strand promoter anti-sense binding	8	P36776
1	156	1	GO:0001047	MF	core promoter binding	8	P56270
1	1	1	GO:0070361	MF	mitochondrial light strand promoter anti-sense binding	8	P36776
1	573	2	GO:0001012	MF	RNA polymerase II regulatory region DNA binding	8	P56270,P18846
1	647	2	GO:0000976	MF	transcription regulatory region sequence-specific DNA binding	8	P56270,P18846
1	568	2	GO:0000977	MF	RNA polymerase II regulatory region sequence-specific DNA binding	9	P56270,P18846
1	105	1	GO:0001046	MF	core promoter sequence-specific DNA binding	9	P56270
1	58	1	GO:0000979	MF	RNA polymerase II core promoter sequence-specific DNA binding	10	P56270
7.12e-31	1598	29	GO:0003723	MF	RNA binding	5	Q9UKD2,Q15717,Q96EP5,P35637,P52272,Q86U42,Q9H307,O00567,P56270,Q13895,Q07666,P22626,P55795,P09651,Q14103,O00422,O14979,P61326,P31943,P52597,P51991,Q01780,Q13151,Q66PJ3,Q01844,O94992,P36776,Q99729,P62805
1	2	1	GO:0061752	MF	telomeric repeat-containing RNA binding	6	P09651
1	24	1	GO:0030515	MF	snoRNA binding	6	O00567
1.74e-08	62	6	GO:0003727	MF	single-stranded RNA binding	6	Q07666,P09651,O14979,P31943,P52597,P36776
0.148	17	2	GO:0070717	MF	poly-purine tract binding	7	Q07666,O14979
0.0848	13	2	GO:0008143	MF	poly(A) binding	8	Q07666,O14979
1	5	1	GO:0034046	MF	poly(G) binding	8	O14979
0.148	17	2	GO:0008187	MF	poly-pyrimidine tract binding	7	Q07666,P31943
0.0848	13	2	GO:0008266	MF	poly(U) RNA binding	8	Q07666,P31943
1	7	1	GO:1990247	MF	N6-methyladenosine-containing RNA binding	6	P22626
1	8	1	GO:0035613	MF	RNA stem-loop binding	6	Q96EP5
0.00143	23	3	GO:0017091	MF	AU-rich element binding	6	Q15717,Q14103,Q13151
1	59	1	GO:0003725	MF	double-stranded RNA binding	6	Q15717
1	34	1	GO:0017069	MF	snRNA binding	6	O94992
1	3	1	GO:0097322	MF	7SK snRNA binding	7	O94992
6.18e-31	1179	27	GO:0044822	MF	poly(A) RNA binding	6	Q9UKD2,Q15717,Q96EP5,P35637,P52272,Q86U42,Q9H307,O00567,P56270,Q13895,Q07666,P22626,P55795,P09651,Q14103,O00422,O14979,P61326,P31943,P52597,P51991,Q01780,Q13151,Q66PJ3,Q01844,Q99729,P62805
0.000306	159	5	GO:0003729	MF	mRNA binding	7	Q15717,P22626,Q14103,P51991,Q99729
0.0146	49	3	GO:0003730	MF	mRNA 3'-UTR binding	8	Q15717,P22626,Q14103
0.0392	9	2	GO:0035925	MF	mRNA 3'-UTR AU-rich region binding	9	Q15717,Q14103
1	15	1	GO:0035198	MF	miRNA binding	6	P22626
1	23	1	GO:0036002	MF	pre-mRNA binding	6	P22626
1	7	1	GO:0097157	MF	pre-mRNA intronic binding	7	P22626
7.31e-11	2686	19	GO:0036094	MF	small molecule binding	3	Q15717,Q96EP5,P35637,P52272,Q86U42,Q9UQE7,P22626,P55795,P09651,Q14103,O14979,P31943,P52597,P51991,Q01780,Q13151,Q01844,P36776,Q99729
8.38e-12	2380	19	GO:0000166	MF	nucleotide binding	4	Q15717,Q96EP5,P35637,P52272,Q86U42,Q9UQE7,P22626,P55795,P09651,Q14103,O14979,P31943,P52597,P51991,Q01780,Q13151,Q01844,P36776,Q99729
1	1902	2	GO:0032553	MF	ribonucleotide binding	5	Q9UQE7,P36776
1	1895	2	GO:0017076	MF	purine nucleotide binding	5	Q9UQE7,P36776
1	1886	2	GO:0032555	MF	purine ribonucleotide binding	6	Q9UQE7,P36776
1	1540	2	GO:0030554	MF	adenyl nucleotide binding	6	Q9UQE7,P36776
1	1533	2	GO:0032559	MF	adenyl ribonucleotide binding	7	Q9UQE7,P36776
1	1864	2	GO:0001882	MF	nucleoside binding	4	Q9UQE7,P36776
1	1857	2	GO:0001883	MF	purine nucleoside binding	5	Q9UQE7,P36776
1	1857	2	GO:0032549	MF	ribonucleoside binding	5	Q9UQE7,P36776
1	1854	2	GO:0032550	MF	purine ribonucleoside binding	6	Q9UQE7,P36776
1	30	1	GO:0043531	MF	ADP binding	7	P36776
1	1496	2	GO:0005524	MF	ATP binding	7	Q9UQE7,P36776

## Sheet: Trn-2
Trn-2 3rd-Z-4% Cargoes (50 Proteins)
p-Value	Total No.	No. of 3rd-Z-4% Cargoes	Term ID	Term Type	Term Name	Term Depth	Accession
1.42e-20	16994	47	GO:0008150	BP	biological_process	1	Q9Y5J1,Q9UKD2,Q15717,O60488,Q96EP5,P51149,P35637,P31942,P52272,Q86U42,Q9H307,O94906,O00567,O60828,P56270,Q16698,P41223,P17480,P35268,Q07666,P22626,P18846,P51151,P55795,P09651,Q14103,P13804,P62913,P62910,Q53H82,O00422,Q15942,Q53GS9,P31943,P52597,P51991,P16615,Q13151,Q66PJ3,Q01844,Q6DD88,O94992,Q99729,P62750,O60716,Q6PD62,P07741
2.15e-19	15371	45	GO:0009987	BP	cellular process	2	Q9Y5J1,Q15717,O60488,Q96EP5,P51149,P35637,P31942,P52272,Q86U42,Q9H307,O94906,O00567,O60828,P56270,Q16698,P41223,P17480,P35268,Q07666,P22626,P18846,P51151,P55795,P09651,Q14103,P13804,P62913,P62910,O00422,Q15942,Q53GS9,P31943,P52597,P51991,P16615,Q13151,Q66PJ3,Q01844,Q6DD88,O94992,Q99729,P62750,O60716,Q6PD62,P07741
1	522	1	GO:0006914	BP	autophagy	3	P51149
1	358	1	GO:0016236	BP	macroautophagy	4	P51149
3.27e-09	11489	32	GO:0065007	BP	biological regulation	2	Q15717,O60488,Q96EP5,P51149,P35637,P52272,Q86U42,Q9H307,O94906,O60828,P56270,P41223,P17480,Q07666,P22626,P18846,P51151,P09651,Q14103,P13804,O00422,Q15942,P31943,P52597,P16615,Q13151,Q01844,O94992,Q99729,O60716,Q6PD62,P07741
1	2862	3	GO:0065009	BP	regulation of molecular function	3	P41223,P51151,O94992
1	1830	1	GO:0044093	BP	positive regulation of molecular function	4	P41223
1	1130	2	GO:0044092	BP	negative regulation of molecular function	4	P51151,O94992
1	3631	10	GO:0065008	BP	regulation of biological quality	3	Q15717,P51149,Q86U42,P51151,P09651,Q14103,P13804,P16615,Q13151,P07741
1	1605	4	GO:0042592	BP	homeostatic process	4	P51149,P09651,P13804,P16615
1	373	2	GO:0060249	BP	anatomical structure homeostasis	5	P51149,P09651
1	1022	3	GO:0048878	BP	chemical homeostasis	5	P51149,P13804,P16615
1	125	1	GO:0055088	BP	lipid homeostasis	6	P13804
1	679	2	GO:0050801	BP	ion homeostasis	6	P51149,P16615
1	604	2	GO:0055080	BP	cation homeostasis	7	P51149,P16615
1	618	2	GO:0098771	BP	inorganic ion homeostasis	7	P51149,P16615
1	124	1	GO:0055067	BP	monovalent inorganic cation homeostasis	8	P51149
1	71	1	GO:0006885	BP	regulation of pH	9	P51149
1	34	1	GO:0045851	BP	pH reduction	10	P51149
1	402	1	GO:0072507	BP	divalent inorganic cation homeostasis	8	P16615
1	555	1	GO:0055065	BP	metal ion homeostasis	8	P16615
1	375	1	GO:0055074	BP	calcium ion homeostasis	9	P16615
1	732	2	GO:0050878	BP	regulation of body fluid levels	4	P16615,P07741
1	578	1	GO:0007599	BP	hemostasis	5	P16615
1	181	1	GO:0001505	BP	regulation of neurotransmitter levels	4	P16615
1	358	1	GO:0042391	BP	regulation of membrane potential	4	P16615
1	9	1	GO:0086036	BP	regulation of cardiac muscle cell membrane potential	5	P16615
1	123	1	GO:0001508	BP	action potential	5	P16615
1	47	1	GO:0086001	BP	cardiac muscle cell action potential	6	P16615
1	1403	2	GO:0000003	BP	reproduction	2	O60488,Q96EP5
3.06e-06	13769	31	GO:0044699	BP	single-organism process	2	Q15717,O60488,Q96EP5,P51149,P31942,P52272,Q86U42,O60828,Q16698,P41223,P17480,P35268,Q07666,P22626,P18846,P51151,P09651,Q14103,P13804,P62913,P62910,O00422,Q15942,Q53GS9,P16615,O94992,Q99729,P62750,O60716,Q6PD62,P07741
1	2026	1	GO:0016265	BP	death	3	O00422
1.04e-05	12573	29	GO:0044763	BP	single-organism cellular process	3	Q15717,O60488,Q96EP5,P51149,P31942,O60828,Q16698,P41223,P17480,P35268,Q07666,P22626,P18846,P51151,P09651,Q14103,P13804,P62913,P62910,O00422,Q15942,Q53GS9,P16615,O94992,Q99729,P62750,O60716,Q6PD62,P07741
1	1979	1	GO:0006928	BP	movement of cell or subcellular component	4	P16615
1	989	1	GO:0001775	BP	cell activation	4	P35268
1	639	2	GO:0030029	BP	actin filament-based process	4	Q15942,P16615
1	113	1	GO:0030048	BP	actin filament-based movement	5	P16615
1	94	1	GO:0070252	BP	actin-mediated cell contraction	6	P16615
1	6420	10	GO:0007154	BP	cell communication	4	P51149,P41223,Q07666,P18846,P51151,Q15942,P16615,O94992,O60716,Q6PD62
1	71	1	GO:0022406	BP	membrane docking	4	P51149
1	8	1	GO:0022615	BP	protein to membrane docking	5	P51149
1	672	1	GO:0051301	BP	cell division	4	Q53GS9
1	1796	3	GO:0007049	BP	cell cycle	4	Q07666,Q53GS9,O94992
1	1038	1	GO:0000278	BP	mitotic cell cycle	5	Q07666
1	1319	1	GO:0022402	BP	cell cycle process	4	Q07666
1	507	1	GO:0044770	BP	cell cycle phase transition	5	Q07666
1	197	1	GO:0044839	BP	cell cycle G2/M phase transition	6	Q07666
1	865	1	GO:1903047	BP	mitotic cell cycle process	5	Q07666
1	483	1	GO:0044772	BP	mitotic cell cycle phase transition	6	Q07666
1	193	1	GO:0000086	BP	G2/M transition of mitotic cell cycle	7	Q07666
1	2026	1	GO:0008219	BP	cell death	4	O00422
1	1921	1	GO:0012501	BP	programmed cell death	5	O00422
1	1901	1	GO:0006915	BP	apoptotic process	6	O00422
1	801	2	GO:0019725	BP	cellular homeostasis	4	P51149,P16615
1	668	2	GO:0055082	BP	cellular chemical homeostasis	5	P51149,P16615
1	540	2	GO:0006873	BP	cellular ion homeostasis	6	P51149,P16615
1	526	2	GO:0030003	BP	cellular cation homeostasis	7	P51149,P16615
1	383	1	GO:0072503	BP	cellular divalent inorganic cation homeostasis	8	P16615
1	77	1	GO:0030004	BP	cellular monovalent inorganic cation homeostasis	8	P51149
1	55	1	GO:0030641	BP	regulation of cellular pH	9	P51149
1	52	1	GO:0051453	BP	regulation of intracellular pH	10	P51149
1	31	1	GO:0051452	BP	intracellular pH reduction	11	P51149
1	487	1	GO:0006875	BP	cellular metal ion homeostasis	8	P16615
1	363	1	GO:0006874	BP	cellular calcium ion homeostasis	9	P16615
1	21	1	GO:0032469	BP	endoplasmic reticulum calcium ion homeostasis	10	P16615
1	2	1	GO:0032470	BP	positive regulation of endoplasmic reticulum calcium ion concentration	11	P16615
1	1990	3	GO:0008283	BP	cell proliferation	3	Q96EP5,Q07666,P62750
0.366	5934	14	GO:0032502	BP	developmental process	2	Q15717,O60488,Q96EP5,P31942,O60828,P35268,P18846,Q14103,P16615,O94992,Q99729,O60716,Q6PD62,P07741
0.102	5272	14	GO:0048856	BP	anatomical structure development	3	Q15717,O60488,Q96EP5,P31942,O60828,P35268,P18846,Q14103,P16615,O94992,Q99729,O60716,Q6PD62,P07741
1	1807	4	GO:0009888	BP	tissue development	4	P31942,P16615,Q99729,Q6PD62
1	80	1	GO:0007492	BP	endoderm development	5	Q6PD62
1	1125	2	GO:0060429	BP	epithelium development	5	P31942,P16615
1	318	1	GO:0008544	BP	epidermis development	6	P16615
1	170	2	GO:0098727	BP	maintenance of cell number	3	Q15717,Q6PD62
0.314	5849	14	GO:0044767	BP	single-organism developmental process	3	Q15717,O60488,Q96EP5,P31942,O60828,P35268,P18846,Q14103,P16615,O94992,Q99729,O60716,Q6PD62,P07741
1	2	1	GO:0043696	BP	dedifferentiation	4	Q14103
1	594	1	GO:0061061	BP	muscle structure development	4	P16615
1	762	2	GO:0060322	BP	head development	4	Q14103,O60716
0.735	4112	11	GO:0048869	BP	cellular developmental process	4	Q15717,O60488,Q96EP5,P31942,O60828,P35268,P18846,Q14103,P16615,Q99729,Q6PD62
1	3859	10	GO:0030154	BP	cell differentiation	5	Q15717,O60488,Q96EP5,P31942,O60828,P35268,P18846,P16615,Q99729,Q6PD62
1	281	2	GO:0048863	BP	stem cell differentiation	6	Q15717,Q99729
1	367	1	GO:0042692	BP	muscle cell differentiation	6	P16615
1	612	1	GO:0030855	BP	epithelial cell differentiation	6	P31942
1	262	1	GO:0045165	BP	cell fate commitment	5	Q6PD62
1	2	1	GO:0043697	BP	cell dedifferentiation	5	Q14103
1	1	1	GO:1990828	BP	hepatocyte dedifferentiation	6	Q14103
1	2225	6	GO:0048468	BP	cell development	5	Q15717,O60488,O60828,P18846,P16615,Q99729
1	180	1	GO:0048864	BP	stem cell development	6	Q99729
1	158	1	GO:0055001	BP	muscle cell development	6	P16615
1	2805	3	GO:0009653	BP	anatomical structure morphogenesis	3	O60828,Q99729,Q6PD62
1	1184	1	GO:0048646	BP	anatomical structure formation involved in morphogenesis	3	Q6PD62
0.0132	5739	16	GO:0051179	BP	localization	2	O60488,P51149,P52272,Q86U42,O94906,P35268,Q07666,P22626,P51151,P09651,P62913,P62910,P51991,P16615,P62750,P07741
5.97e-05	2805	14	GO:0033036	BP	macromolecule localization	3	O60488,P51149,P52272,Q86U42,O94906,P35268,Q07666,P22626,P51151,P09651,P62913,P62910,P51991,P62750
2.59e-05	195	6	GO:0006403	BP	RNA localization	4	Q86U42,O94906,Q07666,P22626,P09651,P51991
1	343	1	GO:0010876	BP	lipid localization	4	O60488
1	2445	7	GO:0008104	BP	protein localization	4	P51149,P52272,P35268,P51151,P62913,P62910,P62750
0.00562	4711	15	GO:0051234	BP	establishment of localization	3	O60488,P51149,P52272,Q86U42,P35268,Q07666,P22626,P51151,P09651,P62913,P62910,P51991,P16615,P62750,P07741
0.000462	163	5	GO:0051236	BP	establishment of RNA localization	4	Q86U42,Q07666,P22626,P09651,P51991
0.00386	4571	15	GO:0006810	BP	transport	4	O60488,P51149,P52272,Q86U42,P35268,Q07666,P22626,P51151,P09651,P62913,P62910,P51991,P16615,P62750,P07741
0.000239	2637	13	GO:0071702	BP	organic substance transport	5	O60488,P51149,P52272,Q86U42,P35268,Q07666,P22626,P51151,P09651,P62913,P62910,P51991,P62750
0.979	807	5	GO:0071705	BP	nitrogen compound transport	5	Q86U42,Q07666,P22626,P09651,P51991
0.00109	194	5	GO:0015931	BP	nucleobase-containing compound transport	6	Q86U42,Q07666,P22626,P09651,P51991
0.000435	161	5	GO:0050657	BP	nucleic acid transport	7	Q86U42,Q07666,P22626,P09651,P51991
0.000435	161	5	GO:0050658	BP	RNA transport	8	Q86U42,Q07666,P22626,P09651,P51991
1	1	1	GO:1990428	BP	miRNA transport	9	P22626
0.00929	135	4	GO:0051028	BP	mRNA transport	9	Q86U42,P22626,P09651,P51991
1	1400	3	GO:0016192	BP	vesicle-mediated transport	5	P51149,P51151,P16615
1	639	1	GO:0006897	BP	endocytosis	6	P51149
1	2012	7	GO:0045184	BP	establishment of protein localization	4	P51149,P52272,P35268,P51151,P62913,P62910,P62750
1	1862	7	GO:0015031	BP	protein transport	5	P51149,P52272,P35268,P51151,P62913,P62910,P62750
0.00832	3044	12	GO:0051641	BP	cellular localization	3	P51149,P52272,Q86U42,P35268,Q07666,P22626,P51151,P09651,P62913,P62910,P16615,P62750
1	97	2	GO:0071166	BP	ribonucleoprotein complex localization	4	Q86U42,P22626
1	1549	6	GO:0070727	BP	cellular macromolecule localization	4	P51149,P52272,P35268,P62913,P62910,P62750
1	1538	6	GO:0034613	BP	cellular protein localization	5	P51149,P52272,P35268,P62913,P62910,P62750
0.157	884	6	GO:0033365	BP	protein localization to organelle	6	P51149,P52272,P35268,P62913,P62910,P62750
1	33	1	GO:0072665	BP	protein localization to vacuole	7	P51149
1	20	1	GO:0061462	BP	protein localization to lysosome	8	P51149
1	354	2	GO:0034504	BP	protein localization to nucleus	7	P52272,P62913
0.00985	137	4	GO:0070972	BP	protein localization to endoplasmic reticulum	7	P35268,P62913,P62910,P62750
0.41	667	5	GO:0072594	BP	establishment of protein localization to organelle	7	P51149,P35268,P62913,P62910,P62750
0.00544	118	4	GO:0072599	BP	establishment of protein localization to endoplasmic reticulum	8	P35268,P62913,P62910,P62750
1	27	1	GO:0072666	BP	establishment of protein localization to vacuole	8	P51149
1	466	1	GO:0051640	BP	organelle localization	4	P16615
1	240	1	GO:0051648	BP	vesicle localization	5	P16615
1	114	1	GO:0097479	BP	synaptic vesicle localization	6	P16615
1	355	1	GO:0051656	BP	establishment of organelle localization	5	P16615
0.0134	2640	11	GO:0051649	BP	establishment of localization in cell	4	P51149,Q86U42,P35268,Q07666,P22626,P51151,P09651,P62913,P62910,P16615,P62750
1	89	1	GO:0099504	BP	synaptic vesicle cycle	5	P16615
0.000567	1905	11	GO:0046907	BP	intracellular transport	5	P51149,Q86U42,P35268,Q07666,P22626,P51151,P09651,P62913,P62910,P16615,P62750
8.43e-06	1257	11	GO:0016482	BP	cytoplasmic transport	6	P51149,Q86U42,P35268,Q07666,P22626,P51151,P09651,P62913,P62910,P16615,P62750
0.926	443	4	GO:0051169	BP	nuclear transport	6	Q86U42,Q07666,P22626,P09651
0.887	438	4	GO:0006913	BP	nucleocytoplasmic transport	7	Q86U42,Q07666,P22626,P09651
0.0169	157	4	GO:0051168	BP	nuclear export	8	Q86U42,Q07666,P22626,P09651
0.00239	96	4	GO:0006405	BP	RNA export from nucleus	9	Q86U42,Q07666,P22626,P09651
1	281	1	GO:0051170	BP	nuclear import	8	P09651
1	1022	5	GO:0006886	BP	intracellular protein transport	6	P51149,P35268,P62913,P62910,P62750
1	228	1	GO:0051650	BP	establishment of vesicle localization	5	P16615
1	108	1	GO:0097480	BP	establishment of synaptic vesicle localization	6	P16615
0.194	4182	12	GO:1902578	BP	single-organism localization	3	O60488,P51149,P52272,Q86U42,P35268,P22626,P51151,P62913,P62910,P16615,P62750,P07741
1	1284	6	GO:1902580	BP	single-organism cellular localization	4	P51149,P35268,P62913,P62910,P16615,P62750
0.127	4002	12	GO:0044765	BP	single-organism transport	4	O60488,P51149,P52272,Q86U42,P35268,P22626,P51151,P62913,P62910,P16615,P62750,P07741
1	306	1	GO:0015849	BP	organic acid transport	5	O60488
1	42	1	GO:1901571	BP	fatty acid derivative transport	5	O60488
0.0194	1742	9	GO:1902582	BP	single-organism intracellular transport	5	P51149,Q86U42,P35268,P22626,P51151,P62913,P62910,P16615,P62750
1	94	2	GO:0071426	BP	ribonucleoprotein complex export from nucleus	6	Q86U42,P22626
1	82	2	GO:0071427	BP	mRNA-containing ribonucleoprotein complex export from nucleus	7	Q86U42,P22626
1	90	1	GO:0007034	BP	vacuolar transport	6	P51149
1	64	1	GO:0007041	BP	lysosomal transport	7	P51149
1	250	2	GO:0016197	BP	endosomal transport	6	P51149,P51151
1	39	1	GO:0045022	BP	early endosome to late endosome transport	7	P51149
1	68	2	GO:0042147	BP	retrograde transport, endosome to Golgi	7	P51149,P51151
1	42	1	GO:0008333	BP	endosome to lysosome transport	7	P51149
0.532	706	5	GO:0006605	BP	protein targeting	6	P51149,P35268,P62913,P62910,P62750
0.00474	114	4	GO:0045047	BP	protein targeting to ER	7	P35268,P62913,P62910,P62750
1	26	1	GO:0006623	BP	protein targeting to vacuole	7	P51149
1	15	1	GO:0006622	BP	protein targeting to lysosome	8	P51149
1	108	1	GO:0048489	BP	synaptic vesicle transport	6	P16615
1	183	1	GO:0006836	BP	neurotransmitter transport	5	P16615
1	1549	2	GO:0006811	BP	ion transport	5	O60488,P16615
1	582	1	GO:0006820	BP	anion transport	6	O60488
1	426	1	GO:0015711	BP	organic anion transport	7	O60488
1	304	1	GO:0046942	BP	carboxylic acid transport	8	O60488
1	42	1	GO:0071715	BP	icosanoid transport	9	O60488
1	154	1	GO:0015718	BP	monocarboxylic acid transport	9	O60488
1	1052	1	GO:0006812	BP	cation transport	6	P16615
1	430	1	GO:0072511	BP	divalent inorganic cation transport	7	P16615
1	813	1	GO:0030001	BP	metal ion transport	7	P16615
1	427	1	GO:0070838	BP	divalent metal ion transport	8	P16615
1	380	1	GO:0006816	BP	calcium ion transport	9	P16615
1	151	1	GO:0070509	BP	calcium ion import	10	P16615
1	126	1	GO:0060401	BP	cytosolic calcium ion transport	10	P16615
1	1	1	GO:1903515	BP	calcium ion transport from cytosol to endoplasmic reticulum	11	P16615
1	33	1	GO:0070296	BP	sarcoplasmic reticulum calcium ion transport	10	P16615
1	3	1	GO:1990036	BP	calcium ion import into sarcoplasmic reticulum	11	P16615
1	1096	5	GO:0046903	BP	secretion	5	O60488,P51149,P51151,P16615,P07741
1	115	1	GO:0046717	BP	acid secretion	6	O60488
1	38	1	GO:0032309	BP	icosanoid secretion	7	O60488
1	100	1	GO:0007589	BP	body fluid secretion	6	P07741
1	963	3	GO:0032940	BP	secretion by cell	6	P51149,P51151,P16615
1	371	3	GO:0006887	BP	exocytosis	7	P51149,P51151,P16615
1	172	1	GO:0045055	BP	regulated exocytosis	8	P16615
1	102	1	GO:0017156	BP	calcium ion regulated exocytosis	9	P16615
1	17	1	GO:1990182	BP	exosomal secretion	8	P51149
1	240	1	GO:0006909	BP	phagocytosis	5	P51149
1	1419	1	GO:0055085	BP	transmembrane transport	5	P16615
1	1017	1	GO:0034220	BP	ion transmembrane transport	6	P16615
1	739	1	GO:0098660	BP	inorganic ion transmembrane transport	7	P16615
1	723	1	GO:0098655	BP	cation transmembrane transport	7	P16615
1	657	1	GO:0098662	BP	inorganic cation transmembrane transport	8	P16615
1	258	1	GO:0070588	BP	calcium ion transmembrane transport	9	P16615
1	309	1	GO:0006869	BP	lipid transport	5	O60488
1	83	1	GO:0015908	BP	fatty acid transport	6	O60488
1	19	1	GO:0015732	BP	prostaglandin transport	7	O60488
1	16	1	GO:0032310	BP	prostaglandin secretion	8	O60488
1	326	1	GO:0017038	BP	protein import	5	P52272
1	6347	10	GO:0023052	BP	signaling	2	P51149,P41223,Q07666,P18846,P51151,Q15942,P16615,O94992,O60716,Q6PD62
1	6337	10	GO:0044700	BP	single organism signaling	3	P51149,P41223,Q07666,P18846,P51151,Q15942,P16615,O94992,O60716,Q6PD62
1	1229	2	GO:0007267	BP	cell-cell signaling	4	Q15942,P16615
1	716	1	GO:0099536	BP	synaptic signaling	5	P16615
1	716	1	GO:0099537	BP	trans-synaptic signaling	6	P16615
1	716	1	GO:0007268	BP	synaptic transmission	7	P16615
1	450	1	GO:0023061	BP	signal release	5	P16615
1	140	1	GO:0007269	BP	neurotransmitter secretion	6	P16615
1	770	1	GO:0007610	BP	behavior	2	P07741
1	446	1	GO:0044708	BP	single-organism behavior	3	P07741
1	19	1	GO:0007625	BP	grooming behavior	4	P07741
0.808	7212	15	GO:0032501	BP	multicellular organismal process	2	Q15717,O60488,Q96EP5,P51149,Q86U42,O60828,P35268,P18846,Q14103,P16615,O94992,Q99729,O60716,Q6PD62,P07741
1	2065	2	GO:0003008	BP	system process	3	Q86U42,P16615
1	521	1	GO:0003013	BP	circulatory system process	4	P16615
1	265	1	GO:0003015	BP	heart process	5	P16615
1	518	1	GO:0008015	BP	blood circulation	5	P16615
1	263	1	GO:0060047	BP	heart contraction	6	P16615
1	398	2	GO:0003012	BP	muscle system process	4	Q86U42,P16615
1	328	2	GO:0006936	BP	muscle contraction	5	Q86U42,P16615
1	150	1	GO:0006941	BP	striated muscle contraction	6	P16615
1	114	1	GO:0060048	BP	cardiac muscle contraction	7	P16615
1	46	1	GO:0086003	BP	cardiac muscle cell contraction	8	P16615
1	29	1	GO:0090075	BP	relaxation of muscle	5	P16615
1	16	1	GO:0055119	BP	relaxation of cardiac muscle	6	P16615
0.555	6175	14	GO:0044707	BP	single-multicellular organism process	3	Q15717,O60488,Q96EP5,P51149,O60828,P35268,P18846,Q14103,P16615,O94992,Q99729,O60716,Q6PD62,P07741
1	189	1	GO:0035637	BP	multicellular organismal signaling	4	P16615
1	90	1	GO:0032941	BP	secretion by tissue	4	P07741
1	579	1	GO:0050817	BP	coagulation	4	P16615
1	153	1	GO:0048771	BP	tissue remodeling	4	P51149
1	79	1	GO:0046849	BP	bone remodeling	5	P51149
1	5038	12	GO:0007275	BP	multicellular organismal development	4	Q15717,O60488,Q96EP5,O60828,P35268,P18846,Q14103,O94992,Q99729,O60716,Q6PD62,P07741
1	4482	11	GO:0048731	BP	system development	5	O60488,Q96EP5,O60828,P35268,P18846,Q14103,O94992,Q99729,O60716,Q6PD62,P07741
1	151	1	GO:0061008	BP	hepaticobiliary system development	6	Q14103
1	461	1	GO:0061458	BP	reproductive system development	6	Q96EP5
1	3212	8	GO:0048513	BP	animal organ development	6	Q96EP5,P35268,Q14103,O94992,Q99729,O60716,Q6PD62,P07741
1	472	2	GO:0048732	BP	gland development	7	Q14103,P07741
1	148	1	GO:0030879	BP	mammary gland development	8	P07741
1	46	1	GO:0007595	BP	lactation	9	P07741
1	148	1	GO:0001889	BP	liver development	8	Q14103
1	248	1	GO:0060485	BP	mesenchyme development	7	Q99729
1	188	1	GO:0048762	BP	mesenchymal cell differentiation	8	Q99729
1	175	1	GO:0014031	BP	mesenchymal cell development	9	Q99729
1	987	1	GO:0072359	BP	circulatory system development	6	O94992
1	2418	5	GO:0007399	BP	nervous system development	6	O60488,O60828,P18846,Q14103,O60716
1	1727	3	GO:0022008	BP	neurogenesis	7	O60488,O60828,P18846
1	1646	3	GO:0048699	BP	generation of neurons	8	O60488,O60828,P18846
1	1532	3	GO:0030182	BP	neuron differentiation	9	O60488,O60828,P18846
1	1269	3	GO:0048666	BP	neuron development	10	O60488,O60828,P18846
1	987	1	GO:0072358	BP	cardiovascular system development	6	O94992
1	538	1	GO:0007507	BP	heart development	7	O94992
1	951	2	GO:0007417	BP	central nervous system development	6	Q14103,O60716
1	719	2	GO:0007420	BP	brain development	7	Q14103,O60716
1	159	1	GO:0030902	BP	hindbrain development	8	Q14103
1	115	1	GO:0022037	BP	metencephalon development	9	Q14103
1	103	1	GO:0021549	BP	cerebellum development	10	Q14103
1	1030	2	GO:0009790	BP	embryo development	5	O60488,Q6PD62
1	644	2	GO:0009792	BP	embryo development ending in birth or egg hatching	6	O60488,Q6PD62
1	636	1	GO:0043009	BP	chordate embryonic development	7	Q6PD62
1	377	1	GO:0001701	BP	in utero embryonic development	8	Q6PD62
1	77	1	GO:0001824	BP	blastocyst development	9	Q6PD62
1	36	1	GO:0001825	BP	blastocyst formation	10	Q6PD62
1	19	1	GO:0001829	BP	trophectodermal cell differentiation	11	Q6PD62
1	8	1	GO:0001826	BP	inner cell mass cell differentiation	11	Q6PD62
1	608	1	GO:0048598	BP	embryonic morphogenesis	6	Q6PD62
1	182	1	GO:0007369	BP	gastrulation	7	Q6PD62
1	120	1	GO:0001704	BP	formation of primary germ layer	8	Q6PD62
1	56	1	GO:0001706	BP	endoderm formation	9	Q6PD62
1	45	1	GO:0035987	BP	endodermal cell differentiation	10	Q6PD62
1	35	1	GO:0060795	BP	cell fate commitment involved in formation of primary germ layer	9	Q6PD62
1	16	1	GO:0001711	BP	endodermal cell fate commitment	10	Q6PD62
1	167	2	GO:0019827	BP	stem cell population maintenance	4	Q15717,Q6PD62
1	347	1	GO:0048871	BP	multicellular organismal homeostasis	4	P51149
1	221	1	GO:0001894	BP	tissue homeostasis	5	P51149
1	55	1	GO:0045453	BP	bone resorption	6	P51149
1	823	2	GO:0032504	BP	multicellular organism reproduction	3	O60488,Q96EP5
1	2673	4	GO:0002376	BP	immune system process	2	P51149,P35268,P18846,Q6PD62
1	241	1	GO:0019882	BP	antigen processing and presentation	3	P51149
1	99	1	GO:0002504	BP	antigen processing and presentation of peptide or polysaccharide antigen via MHC class II	4	P51149
1	181	1	GO:0019884	BP	antigen processing and presentation of exogenous antigen	4	P51149
1	194	1	GO:0048002	BP	antigen processing and presentation of peptide antigen	4	P51149
1	174	1	GO:0002478	BP	antigen processing and presentation of exogenous peptide antigen	5	P51149
1	96	1	GO:0002495	BP	antigen processing and presentation of peptide antigen via MHC class II	5	P51149
1	92	1	GO:0019886	BP	antigen processing and presentation of exogenous peptide antigen via MHC class II	6	P51149
1	750	1	GO:0045321	BP	leukocyte activation	3	P35268
1	644	1	GO:0046649	BP	lymphocyte activation	4	P35268
1	843	2	GO:0002520	BP	immune system development	3	P35268,Q6PD62
1	795	2	GO:0048534	BP	hematopoietic or lymphoid organ development	4	P35268,Q6PD62
1	749	2	GO:0030097	BP	hemopoiesis	5	P35268,Q6PD62
1	470	1	GO:0002521	BP	leukocyte differentiation	6	P35268
1	314	1	GO:0030098	BP	lymphocyte differentiation	7	P35268
1	346	1	GO:0030099	BP	myeloid cell differentiation	6	Q6PD62
1.81e-22	12055	44	GO:0008152	BP	metabolic process	2	Q9Y5J1,Q15717,O60488,Q96EP5,P51149,P35637,P31942,P52272,Q86U42,Q9H307,O94906,O00567,O60828,P56270,Q16698,P41223,P17480,P35268,Q07666,P22626,P18846,P55795,P09651,Q14103,P13804,P62913,P62910,Q53H82,O00422,Q53GS9,P31943,P52597,P51991,P16615,Q13151,Q66PJ3,Q01844,Q6DD88,O94992,Q99729,P62750,O60716,Q6PD62,P07741
1.18e-20	10482	41	GO:0044238	BP	primary metabolic process	3	Q9Y5J1,Q15717,O60488,Q96EP5,P51149,P35637,P31942,P52272,Q86U42,Q9H307,O94906,O00567,O60828,P56270,Q16698,P41223,P17480,P35268,Q07666,P22626,P18846,P55795,P09651,Q14103,P13804,P62913,P62910,O00422,Q53GS9,P31943,P52597,P51991,Q13151,Q66PJ3,Q01844,O94992,Q99729,P62750,O60716,Q6PD62,P07741
6.02e-22	6922	37	GO:0006807	BP	nitrogen compound metabolic process	3	Q9Y5J1,Q15717,Q96EP5,P35637,P31942,P52272,Q86U42,Q9H307,O94906,O00567,O60828,P56270,P41223,P17480,P35268,Q07666,P22626,P18846,P55795,P09651,Q14103,P62913,P62910,O00422,Q53GS9,P31943,P52597,P51991,Q13151,Q66PJ3,Q01844,O94992,Q99729,P62750,O60716,Q6PD62,P07741
0.896	5684	13	GO:0044710	BP	single-organism metabolic process	3	O60488,P51149,Q16698,P35268,P22626,P18846,P09651,P13804,P62913,P62910,P62750,Q6PD62,P07741
1	69	1	GO:0042440	BP	pigment metabolic process	4	P07741
1	2701	8	GO:0044281	BP	small molecule metabolic process	4	O60488,Q16698,P35268,P13804,P62913,P62910,P62750,P07741
1	1111	2	GO:0055114	BP	oxidation-reduction process	4	Q16698,P13804
3.94e-20	10808	41	GO:0071704	BP	organic substance metabolic process	3	Q9Y5J1,Q15717,O60488,Q96EP5,P51149,P35637,P31942,P52272,Q86U42,Q9H307,O94906,O00567,O60828,P56270,Q16698,P41223,P17480,P35268,Q07666,P22626,P18846,P55795,P09651,Q14103,P13804,P62913,P62910,O00422,Q53GS9,P31943,P52597,P51991,Q13151,Q66PJ3,Q01844,O94992,Q99729,P62750,O60716,Q6PD62,P07741
1.92e-17	9286	37	GO:0043170	BP	macromolecule metabolic process	4	Q9Y5J1,Q15717,Q96EP5,P51149,P35637,P31942,P52272,Q86U42,Q9H307,O94906,O00567,O60828,P56270,P41223,P17480,P35268,Q07666,P22626,P18846,P55795,P09651,Q14103,P62913,P62910,O00422,Q53GS9,P31943,P52597,P51991,Q13151,Q66PJ3,Q01844,O94992,Q99729,P62750,O60716,Q6PD62
2.95e-24	5430	36	GO:0010467	BP	gene expression	5	Q9Y5J1,Q15717,Q96EP5,P35637,P31942,P52272,Q86U42,Q9H307,O94906,O00567,O60828,P56270,P41223,P17480,P35268,Q07666,P22626,P18846,P55795,P09651,Q14103,P62913,P62910,O00422,Q53GS9,P31943,P52597,P51991,Q13151,Q66PJ3,Q01844,O94992,Q99729,P62750,O60716,Q6PD62
1	82	2	GO:0006406	BP	mRNA export from nucleus	6	Q86U42,P22626
1	14	1	GO:0016973	BP	poly(A)+ mRNA export from nucleus	7	Q86U42
1	4139	5	GO:0043412	BP	macromolecule modification	5	O00567,P18846,Q53GS9,O94992,Q6PD62
1	5770	13	GO:0019538	BP	protein metabolic process	5	Q15717,P51149,P35268,Q07666,P22626,P18846,Q14103,P62913,P62910,Q53GS9,O94992,P62750,Q6PD62
1	1632	1	GO:0006508	BP	proteolysis	6	Q53GS9
1	3959	4	GO:0036211	BP	protein modification process	6	P18846,Q53GS9,O94992,Q6PD62
1	1381	1	GO:1901135	BP	carbohydrate derivative metabolic process	4	P07741
1	409	1	GO:1901657	BP	glycosyl compound metabolic process	5	P07741
0.164	2290	9	GO:1901564	BP	organonitrogen compound metabolic process	4	Q15717,P35268,Q07666,P22626,Q14103,P62913,P62910,P62750,P07741
2.16e-22	6143	36	GO:1901360	BP	organic cyclic compound metabolic process	4	Q9Y5J1,Q96EP5,P35637,P31942,P52272,Q86U42,Q9H307,O94906,O00567,O60828,P56270,P41223,P17480,P35268,Q07666,P22626,P18846,P55795,P09651,Q14103,P62913,P62910,O00422,Q53GS9,P31943,P52597,P51991,Q13151,Q66PJ3,Q01844,O94992,Q99729,P62750,O60716,Q6PD62,P07741
1	1363	4	GO:0006629	BP	lipid metabolic process	4	O60488,P51149,Q16698,P13804
0.851	2256	8	GO:0009056	BP	catabolic process	3	P51149,Q16698,P35268,Q14103,P13804,P62913,P62910,P62750
0.234	1864	8	GO:1901575	BP	organic substance catabolic process	4	P51149,Q16698,P35268,Q14103,P13804,P62913,P62910,P62750
0.0934	486	5	GO:1901361	BP	organic cyclic compound catabolic process	5	P35268,Q14103,P62913,P62910,P62750
0.808	1199	6	GO:0009057	BP	macromolecule catabolic process	5	P51149,P35268,Q14103,P62913,P62910,P62750
1	827	1	GO:0030163	BP	protein catabolic process	6	P51149
1	1178	3	GO:0044712	BP	single-organism catabolic process	4	P51149,Q16698,P13804
1	356	2	GO:0044282	BP	small molecule catabolic process	5	Q16698,P13804
1	299	3	GO:0016042	BP	lipid catabolic process	5	P51149,Q16698,P13804
1	367	1	GO:0032259	BP	methylation	3	Q6PD62
3.97e-10	6390	26	GO:0009058	BP	biosynthetic process	3	Q15717,O60488,P35637,Q86U42,Q9H307,O94906,O60828,P56270,P41223,P17480,P35268,Q07666,P22626,P18846,P09651,Q14103,P62913,P62910,O00422,Q01844,O94992,Q99729,P62750,O60716,Q6PD62,P07741
1	1776	3	GO:0044711	BP	single-organism biosynthetic process	4	O60488,P09651,P07741
1	53	1	GO:0046148	BP	pigment biosynthetic process	5	P07741
2.9e-10	6305	26	GO:1901576	BP	organic substance biosynthetic process	4	Q15717,O60488,P35637,Q86U42,Q9H307,O94906,O60828,P56270,P41223,P17480,P35268,Q07666,P22626,P18846,P09651,Q14103,P62913,P62910,O00422,Q01844,O94992,Q99729,P62750,O60716,Q6PD62,P07741
1.86e-10	4506	23	GO:1901362	BP	organic cyclic compound biosynthetic process	5	P35637,Q86U42,Q9H307,O94906,O60828,P56270,P41223,P17480,P35268,Q07666,P22626,P18846,Q14103,P62913,P62910,O00422,Q01844,O94992,Q99729,P62750,O60716,Q6PD62,P07741
0.00415	1439	9	GO:1901566	BP	organonitrogen compound biosynthetic process	5	Q15717,P35268,Q07666,P22626,Q14103,P62913,P62910,P62750,P07741
1	894	1	GO:1901137	BP	carbohydrate derivative biosynthetic process	5	P07741
1	130	1	GO:1901659	BP	glycosyl compound biosynthetic process	6	P07741
5.28e-10	5283	24	GO:0009059	BP	macromolecule biosynthetic process	5	Q15717,P35637,Q86U42,Q9H307,O94906,O60828,P56270,P41223,P17480,P35268,Q07666,P22626,P18846,P09651,Q14103,P62913,P62910,O00422,Q01844,O94992,Q99729,P62750,O60716,Q6PD62
1	659	1	GO:0008610	BP	lipid biosynthetic process	5	O60488
8.32e-21	10390	41	GO:0044237	BP	cellular metabolic process	3	Q9Y5J1,Q15717,O60488,Q96EP5,P51149,P35637,P31942,P52272,Q86U42,Q9H307,O94906,O00567,O60828,P56270,Q16698,P41223,P17480,P35268,Q07666,P22626,P18846,P55795,P09651,Q14103,P13804,P62913,P62910,O00422,Q53GS9,P31943,P52597,P51991,Q13151,Q66PJ3,Q01844,O94992,Q99729,P62750,O60716,Q6PD62,P07741
1	3149	4	GO:0006793	BP	phosphorus metabolic process	4	O60488,P18846,O94992,P07741
1	3088	3	GO:0006796	BP	phosphate-containing compound metabolic process	5	P18846,O94992,P07741
1	2213	2	GO:0016310	BP	phosphorylation	6	P18846,O94992
1	1081	1	GO:0019637	BP	organophosphate metabolic process	5	P07741
1	595	1	GO:0090407	BP	organophosphate biosynthetic process	6	P07741
1	534	1	GO:0019693	BP	ribose phosphate metabolic process	6	P07741
1	267	1	GO:0046390	BP	ribose phosphate biosynthetic process	7	P07741
1.28e-18	8596	37	GO:0044260	BP	cellular macromolecule metabolic process	4	Q9Y5J1,Q15717,Q96EP5,P51149,P35637,P31942,P52272,Q86U42,Q9H307,O94906,O00567,O60828,P56270,P41223,P17480,P35268,Q07666,P22626,P18846,P55795,P09651,Q14103,P62913,P62910,O00422,Q53GS9,P31943,P52597,P51991,Q13151,Q66PJ3,Q01844,O94992,Q99729,P62750,O60716,Q6PD62
1	280	1	GO:0043414	BP	macromolecule methylation	5	Q6PD62
0.345	5157	13	GO:0044267	BP	cellular protein metabolic process	5	Q15717,P51149,P35268,Q07666,P22626,P18846,Q14103,P62913,P62910,Q53GS9,O94992,P62750,Q6PD62
1	3959	4	GO:0006464	BP	cellular protein modification process	6	P18846,Q53GS9,O94992,Q6PD62
1	1023	2	GO:0070647	BP	protein modification by small protein conjugation or removal	7	Q53GS9,Q6PD62
1	896	1	GO:0032446	BP	protein modification by small protein conjugation	8	Q6PD62
1	784	1	GO:0016567	BP	protein ubiquitination	9	Q6PD62
1	53	1	GO:0006513	BP	protein monoubiquitination	10	Q6PD62
1	145	1	GO:0070646	BP	protein modification by small protein removal	8	Q53GS9
1	128	1	GO:0016579	BP	protein deubiquitination	9	Q53GS9
1	160	1	GO:0008213	BP	protein alkylation	7	Q6PD62
1	160	1	GO:0006479	BP	protein methylation	8	Q6PD62
1	1367	1	GO:0018193	BP	peptidyl-amino acid modification	7	Q6PD62
1	398	1	GO:0018205	BP	peptidyl-lysine modification	8	Q6PD62
1	109	1	GO:0018022	BP	peptidyl-lysine methylation	9	Q6PD62
1	31	1	GO:0018023	BP	peptidyl-lysine trimethylation	10	Q6PD62
1	1849	2	GO:0006468	BP	protein phosphorylation	7	P18846,O94992
0.143	1736	8	GO:0044248	BP	cellular catabolic process	4	P51149,Q16698,P35268,Q14103,P13804,P62913,P62910,P62750
0.24	956	6	GO:0044265	BP	cellular macromolecule catabolic process	5	P51149,P35268,Q14103,P62913,P62910,P62750
1	681	1	GO:0044257	BP	cellular protein catabolic process	6	P51149
5.47e-23	5905	36	GO:0046483	BP	heterocycle metabolic process	4	Q9Y5J1,Q96EP5,P35637,P31942,P52272,Q86U42,Q9H307,O94906,O00567,O60828,P56270,P41223,P17480,P35268,Q07666,P22626,P18846,P55795,P09651,Q14103,P62913,P62910,O00422,Q53GS9,P31943,P52597,P51991,Q13151,Q66PJ3,Q01844,O94992,Q99729,P62750,O60716,Q6PD62,P07741
0.0608	444	5	GO:0046700	BP	heterocycle catabolic process	5	P35268,Q14103,P62913,P62910,P62750
1	366	1	GO:0051186	BP	cofactor metabolic process	4	O60488
1	306	1	GO:0006732	BP	coenzyme metabolic process	5	O60488
6.01e-23	5921	36	GO:0006725	BP	cellular aromatic compound metabolic process	4	Q9Y5J1,Q96EP5,P35637,P31942,P52272,Q86U42,Q9H307,O94906,O00567,O60828,P56270,P41223,P17480,P35268,Q07666,P22626,P18846,P55795,P09651,Q14103,P62913,P62910,O00422,Q53GS9,P31943,P52597,P51991,Q13151,Q66PJ3,Q01844,O94992,Q99729,P62750,O60716,Q6PD62,P07741
0.0683	455	5	GO:0019439	BP	aromatic compound catabolic process	5	P35268,Q14103,P62913,P62910,P62750
1	383	1	GO:0006790	BP	sulfur compound metabolic process	4	O60488
1	91	1	GO:0035383	BP	thioester metabolic process	5	O60488
1	91	1	GO:0006637	BP	acyl-CoA metabolic process	6	O60488
1	52	1	GO:0035337	BP	fatty-acyl-CoA metabolic process	7	O60488
1	46	1	GO:0035336	BP	long-chain fatty-acyl-CoA metabolic process	8	O60488
1	491	1	GO:0006091	BP	generation of precursor metabolites and energy	4	P13804
1	402	1	GO:0015980	BP	energy derivation by oxidation of organic compounds	5	P13804
1	213	1	GO:0045333	BP	cellular respiration	6	P13804
1	147	1	GO:0022900	BP	electron transport chain	5	P13804
1	145	1	GO:0022904	BP	respiratory electron transport chain	6	P13804
0.00526	117	4	GO:0001887	BP	selenium compound metabolic process	4	P35268,P62913,P62910,P62750
1.2e-22	6616	37	GO:0034641	BP	cellular nitrogen compound metabolic process	4	Q9Y5J1,Q15717,Q96EP5,P35637,P31942,P52272,Q86U42,Q9H307,O94906,O00567,O60828,P56270,P41223,P17480,P35268,Q07666,P22626,P18846,P55795,P09651,Q14103,P62913,P62910,O00422,Q53GS9,P31943,P52597,P51991,Q13151,Q66PJ3,Q01844,O94992,Q99729,P62750,O60716,Q6PD62,P07741
0.0608	444	5	GO:0044270	BP	cellular nitrogen compound catabolic process	5	P35268,Q14103,P62913,P62910,P62750
1	575	1	GO:0072521	BP	purine-containing compound metabolic process	5	P07741
0.00276	1004	8	GO:0043603	BP	cellular amide metabolic process	5	Q15717,P35268,Q07666,P22626,Q14103,P62913,P62910,P62750
0.000697	835	8	GO:0006518	BP	peptide metabolic process	6	Q15717,P35268,Q07666,P22626,Q14103,P62913,P62910,P62750
1.83e-23	5722	36	GO:0006139	BP	nucleobase-containing compound metabolic process	5	Q9Y5J1,Q96EP5,P35637,P31942,P52272,Q86U42,Q9H307,O94906,O00567,O60828,P56270,P41223,P17480,P35268,Q07666,P22626,P18846,P55795,P09651,Q14103,P62913,P62910,O00422,Q53GS9,P31943,P52597,P51991,Q13151,Q66PJ3,Q01844,O94992,Q99729,P62750,O60716,Q6PD62,P07741
1.1e-23	5125	35	GO:0090304	BP	nucleic acid metabolic process	6	Q9Y5J1,Q96EP5,P35637,P31942,P52272,Q86U42,Q9H307,O94906,O00567,O60828,P56270,P41223,P17480,P35268,Q07666,P22626,P18846,P55795,P09651,Q14103,P62913,P62910,O00422,Q53GS9,P31943,P52597,P51991,Q13151,Q66PJ3,Q01844,O94992,Q99729,P62750,O60716,Q6PD62
2.94e-25	4606	35	GO:0016070	BP	RNA metabolic process	7	Q9Y5J1,Q96EP5,P35637,P31942,P52272,Q86U42,Q9H307,O94906,O00567,O60828,P56270,P41223,P17480,P35268,Q07666,P22626,P18846,P55795,P09651,Q14103,P62913,P62910,O00422,Q53GS9,P31943,P52597,P51991,Q13151,Q66PJ3,Q01844,O94992,Q99729,P62750,O60716,Q6PD62
1	38	1	GO:0043631	BP	RNA polyadenylation	8	Q6PD62
1	480	4	GO:0034660	BP	ncRNA metabolic process	8	Q9Y5J1,O00567,P22626,P62913
0.623	161	3	GO:0016072	BP	rRNA metabolic process	9	Q9Y5J1,O00567,P62913
1.66e-35	631	26	GO:0016071	BP	mRNA metabolic process	8	Q96EP5,P35637,P31942,P52272,Q86U42,Q9H307,O94906,O60828,P41223,P35268,Q07666,P22626,P55795,P09651,Q14103,P62913,P62910,O00422,Q53GS9,P31943,P52597,P51991,Q13151,Q66PJ3,P62750,Q6PD62
1.33e-30	821	25	GO:0006396	BP	RNA processing	8	Q9Y5J1,Q96EP5,P35637,P31942,P52272,Q86U42,Q9H307,O94906,O00567,O60828,P41223,Q07666,P22626,P55795,P09651,Q14103,P62913,O00422,Q53GS9,P31943,P52597,P51991,Q13151,Q66PJ3,Q6PD62
0.307	331	4	GO:0034470	BP	ncRNA processing	9	Q9Y5J1,O00567,P22626,P62913
3.1e-28	383	20	GO:0008380	BP	RNA splicing	9	Q96EP5,P35637,P31942,P52272,Q86U42,Q9H307,O94906,O60828,P41223,P22626,P55795,P09651,Q14103,O00422,Q53GS9,P31943,P52597,P51991,Q13151,Q66PJ3
1.45e-28	289	19	GO:0000375	BP	RNA splicing, via transesterification reactions	10	Q96EP5,P35637,P31942,P52272,Q86U42,Q9H307,O94906,O60828,P41223,P22626,P55795,P09651,Q14103,O00422,Q53GS9,P31943,P52597,P51991,Q13151
1.11e-28	285	19	GO:0000377	BP	RNA splicing, via transesterification reactions with bulged adenosine as nucleophile	11	Q96EP5,P35637,P31942,P52272,Q86U42,Q9H307,O94906,O60828,P41223,P22626,P55795,P09651,Q14103,O00422,Q53GS9,P31943,P52597,P51991,Q13151
1	109	2	GO:0031123	BP	RNA 3'-end processing	9	Q86U42,Q6PD62
8.91e-31	454	22	GO:0006397	BP	mRNA processing	9	Q96EP5,P35637,P31942,P52272,Q86U42,Q9H307,O94906,O60828,P41223,Q07666,P22626,P55795,P09651,Q14103,O00422,Q53GS9,P31943,P52597,P51991,Q13151,Q66PJ3,Q6PD62
1	83	2	GO:0031124	BP	mRNA 3'-end processing	10	Q86U42,Q6PD62
1	37	1	GO:0006378	BP	mRNA polyadenylation	11	Q6PD62
1.11e-28	285	19	GO:0000398	BP	mRNA splicing, via spliceosome	10	Q96EP5,P35637,P31942,P52272,Q86U42,Q9H307,O94906,O60828,P41223,P22626,P55795,P09651,Q14103,O00422,Q53GS9,P31943,P52597,P51991,Q13151
7.52e-05	41	4	GO:0000380	BP	alternative mRNA splicing, via spliceosome	11	P52272,O60828,P09651,O00422
1	126	1	GO:0009451	BP	RNA modification	8	O00567
1	978	2	GO:0006259	BP	DNA metabolic process	7	P18846,P09651
0.0361	398	5	GO:0034655	BP	nucleobase-containing compound catabolic process	6	P35268,Q14103,P62913,P62910,P62750
0.00318	241	5	GO:0006401	BP	RNA catabolic process	7	P35268,Q14103,P62913,P62910,P62750
0.0549	212	4	GO:0006402	BP	mRNA catabolic process	8	P35268,P62913,P62910,P62750
0.0404	196	4	GO:0000956	BP	nuclear-transcribed mRNA catabolic process	9	P35268,P62913,P62910,P62750
0.00642	123	4	GO:0000184	BP	nuclear-transcribed mRNA catabolic process, nonsense-mediated decay	10	P35268,P62913,P62910,P62750
1	715	1	GO:0055086	BP	nucleobase-containing small molecule metabolic process	6	P07741
1	71	1	GO:0009112	BP	nucleobase metabolic process	7	P07741
1	42	1	GO:0006144	BP	purine nucleobase metabolic process	8	P07741
1	3	1	GO:0046083	BP	adenine metabolic process	9	P07741
1	655	1	GO:0006753	BP	nucleoside phosphate metabolic process	7	P07741
1	286	1	GO:0009123	BP	nucleoside monophosphate metabolic process	8	P07741
1	274	1	GO:0009161	BP	ribonucleoside monophosphate metabolic process	9	P07741
1	263	1	GO:0009126	BP	purine nucleoside monophosphate metabolic process	9	P07741
1	262	1	GO:0009167	BP	purine ribonucleoside monophosphate metabolic process	10	P07741
1	648	1	GO:0009117	BP	nucleotide metabolic process	8	P07741
1	520	1	GO:0009259	BP	ribonucleotide metabolic process	9	P07741
1	526	1	GO:0006163	BP	purine nucleotide metabolic process	9	P07741
1	505	1	GO:0009150	BP	purine ribonucleotide metabolic process	10	P07741
1	390	1	GO:0009116	BP	nucleoside metabolic process	7	P07741
1	366	1	GO:0009119	BP	ribonucleoside metabolic process	8	P07741
1	340	1	GO:0042278	BP	purine nucleoside metabolic process	8	P07741
1	337	1	GO:0046128	BP	purine ribonucleoside metabolic process	9	P07741
1	15	1	GO:0046033	BP	AMP metabolic process	10	P07741
2.03e-10	6210	26	GO:0044249	BP	cellular biosynthetic process	4	Q15717,O60488,P35637,Q86U42,Q9H307,O94906,O60828,P56270,P41223,P17480,P35268,Q07666,P22626,P18846,P09651,Q14103,P62913,P62910,O00422,Q01844,O94992,Q99729,P62750,O60716,Q6PD62,P07741
1	36	1	GO:0043094	BP	cellular metabolic compound salvage	5	P07741
1.01e-10	4378	23	GO:0018130	BP	heterocycle biosynthetic process	5	P35637,Q86U42,Q9H307,O94906,O60828,P56270,P41223,P17480,P35268,Q07666,P22626,P18846,Q14103,P62913,P62910,O00422,Q01844,O94992,Q99729,P62750,O60716,Q6PD62,P07741
1	16	1	GO:0046112	BP	nucleobase biosynthetic process	6	P07741
1	217	1	GO:0044272	BP	sulfur compound biosynthetic process	5	O60488
1	62	1	GO:0035384	BP	thioester biosynthetic process	6	O60488
1.19e-10	4934	24	GO:0044271	BP	cellular nitrogen compound biosynthetic process	5	Q15717,P35637,Q86U42,Q9H307,O94906,O60828,P56270,P41223,P17480,P35268,Q07666,P22626,P18846,Q14103,P62913,P62910,O00422,Q01844,O94992,Q99729,P62750,O60716,Q6PD62,P07741
0.000433	784	8	GO:0043604	BP	amide biosynthetic process	6	Q15717,P35268,Q07666,P22626,Q14103,P62913,P62910,P62750
0.000195	706	8	GO:0043043	BP	peptide biosynthetic process	7	Q15717,P35268,Q07666,P22626,Q14103,P62913,P62910,P62750
1.03e-10	4381	23	GO:0019438	BP	aromatic compound biosynthetic process	5	P35637,Q86U42,Q9H307,O94906,O60828,P56270,P41223,P17480,P35268,Q07666,P22626,P18846,Q14103,P62913,P62910,O00422,Q01844,O94992,Q99729,P62750,O60716,Q6PD62,P07741
7.28e-11	4310	23	GO:0034654	BP	nucleobase-containing compound biosynthetic process	6	P35637,Q86U42,Q9H307,O94906,O60828,P56270,P41223,P17480,P35268,Q07666,P22626,P18846,Q14103,P62913,P62910,O00422,Q01844,O94992,Q99729,P62750,O60716,Q6PD62,P07741
1	128	1	GO:0009163	BP	nucleoside biosynthetic process	7	P07741
1	16	1	GO:0043174	BP	nucleoside salvage	8	P07741
1	118	1	GO:0042455	BP	ribonucleoside biosynthetic process	8	P07741
1	318	1	GO:1901293	BP	nucleoside phosphate biosynthetic process	7	P07741
1	91	1	GO:0009124	BP	nucleoside monophosphate biosynthetic process	8	P07741
1	71	1	GO:0009127	BP	purine nucleoside monophosphate biosynthetic process	9	P07741
1	83	1	GO:0009156	BP	ribonucleoside monophosphate biosynthetic process	9	P07741
1	71	1	GO:0009168	BP	purine ribonucleoside monophosphate biosynthetic process	10	P07741
1	313	1	GO:0009165	BP	nucleotide biosynthetic process	8	P07741
1	13	1	GO:0043173	BP	nucleotide salvage	9	P07741
1	264	1	GO:0009260	BP	ribonucleotide biosynthetic process	9	P07741
1.1e-10	3903	22	GO:0032774	BP	RNA biosynthetic process	7	P35637,Q86U42,Q9H307,O94906,O60828,P56270,P41223,P17480,P35268,Q07666,P22626,P18846,Q14103,P62913,P62910,O00422,Q01844,O94992,Q99729,P62750,O60716,Q6PD62
7.18e-07	3781	18	GO:0097659	BP	nucleic acid-templated transcription	8	P35637,Q86U42,Q9H307,O94906,O60828,P56270,P41223,P17480,Q07666,P22626,P18846,Q14103,O00422,Q01844,O94992,Q99729,O60716,Q6PD62
1	271	1	GO:0072522	BP	purine-containing compound biosynthetic process	6	P07741
1	99	1	GO:0042451	BP	purine nucleoside biosynthetic process	7	P07741
1	99	1	GO:0046129	BP	purine ribonucleoside biosynthetic process	8	P07741
1	16	1	GO:0043101	BP	purine-containing compound salvage	7	P07741
1	4	1	GO:0006166	BP	purine ribonucleoside salvage	8	P07741
1	10	1	GO:0009113	BP	purine nucleobase biosynthetic process	7	P07741
1	4	1	GO:0043096	BP	purine nucleobase salvage	8	P07741
1	3	1	GO:0046084	BP	adenine biosynthetic process	8	P07741
1	2	1	GO:0006168	BP	adenine salvage	9	P07741
1	257	1	GO:0006164	BP	purine nucleotide biosynthetic process	7	P07741
1	7	1	GO:0032261	BP	purine nucleotide salvage	8	P07741
1	251	1	GO:0009152	BP	purine ribonucleotide biosynthetic process	8	P07741
1	7	1	GO:0006167	BP	AMP biosynthetic process	9	P07741
1	2	1	GO:0044209	BP	AMP salvage	10	P07741
1	162	1	GO:0051188	BP	cofactor biosynthetic process	5	O60488
1	134	1	GO:0009108	BP	coenzyme biosynthetic process	6	O60488
1	62	1	GO:0071616	BP	acyl-CoA biosynthetic process	7	O60488
1	44	1	GO:0046949	BP	fatty-acyl-CoA biosynthetic process	8	O60488
1	42	1	GO:0035338	BP	long-chain fatty-acyl-CoA biosynthetic process	9	O60488
2.73e-09	5123	23	GO:0034645	BP	cellular macromolecule biosynthetic process	5	Q15717,Q86U42,Q9H307,O94906,O60828,P56270,P41223,P17480,P35268,Q07666,P22626,P18846,P09651,Q14103,P62913,P62910,O00422,Q01844,O94992,Q99729,P62750,O60716,Q6PD62
1	338	2	GO:0006260	BP	DNA replication	6	P18846,P09651
1	57	1	GO:0006278	BP	RNA-dependent DNA replication	7	P09651
0.000142	677	8	GO:0006412	BP	translation	6	Q15717,P35268,Q07666,P22626,Q14103,P62913,P62910,P62750
1	41	1	GO:0002181	BP	cytoplasmic translation	7	P35268
0.0623	219	4	GO:0006414	BP	translational elongation	6	P35268,P62913,P62910,P62750
5.79e-06	3766	17	GO:0006351	BP	transcription, DNA-templated	6	Q86U42,Q9H307,O94906,O60828,P56270,P41223,P17480,Q07666,P22626,P18846,Q14103,O00422,Q01844,O94992,Q99729,O60716,Q6PD62
1	134	2	GO:0006354	BP	DNA-templated transcription, elongation	7	P17480,Q6PD62
0.135	96	3	GO:0006353	BP	DNA-templated transcription, termination	7	Q86U42,P56270,P17480
1	321	2	GO:0006352	BP	DNA-templated transcription, initiation	7	P56270,P17480
1	59	1	GO:0006360	BP	transcription from RNA polymerase I promoter	7	P17480
1	31	1	GO:0006362	BP	transcription elongation from RNA polymerase I promoter	8	P17480
1	34	1	GO:0006361	BP	transcription initiation from RNA polymerase I promoter	8	P17480
1	31	1	GO:0006363	BP	termination of RNA polymerase I transcription	8	P17480
0.00902	2036	10	GO:0006366	BP	transcription from RNA polymerase II promoter	7	Q86U42,O94906,P56270,P41223,P22626,P18846,O00422,O94992,Q99729,Q6PD62
1	95	1	GO:0006368	BP	transcription elongation from RNA polymerase II promoter	8	Q6PD62
1	47	2	GO:0006369	BP	termination of RNA polymerase II transcription	8	Q86U42,P56270
1	279	1	GO:0006367	BP	transcription initiation from RNA polymerase II promoter	8	P56270
0.27	320	4	GO:0006575	BP	cellular modified amino acid metabolic process	4	P35268,P62913,P62910,P62750
0.125	1246	7	GO:0006082	BP	organic acid metabolic process	4	O60488,Q16698,P35268,P13804,P62913,P62910,P62750
0.115	1230	7	GO:0043436	BP	oxoacid metabolic process	5	O60488,Q16698,P35268,P13804,P62913,P62910,P62750
0.0589	1106	7	GO:0019752	BP	carboxylic acid metabolic process	6	O60488,Q16698,P35268,P13804,P62913,P62910,P62750
1	612	3	GO:0032787	BP	monocarboxylic acid metabolic process	7	O60488,Q16698,P13804
1	518	4	GO:0006520	BP	cellular amino acid metabolic process	7	P35268,P62913,P62910,P62750
0.384	351	4	GO:1901605	BP	alpha-amino acid metabolic process	8	P35268,P62913,P62910,P62750
0.00729	127	4	GO:0009069	BP	serine family amino acid metabolic process	9	P35268,P62913,P62910,P62750
0.00184	90	4	GO:0016259	BP	selenocysteine metabolic process	10	P35268,P62913,P62910,P62750
1	231	2	GO:0016054	BP	organic acid catabolic process	5	Q16698,P13804
1	231	2	GO:0046395	BP	carboxylic acid catabolic process	6	Q16698,P13804
1	111	2	GO:0072329	BP	monocarboxylic acid catabolic process	7	Q16698,P13804
1	1066	4	GO:0044255	BP	cellular lipid metabolic process	4	O60488,P51149,Q16698,P13804
1	163	1	GO:0006638	BP	neutral lipid metabolic process	5	O60488
1	88	1	GO:0046460	BP	neutral lipid biosynthetic process	6	O60488
1	195	2	GO:0030258	BP	lipid modification	5	Q16698,P13804
1	98	2	GO:0034440	BP	lipid oxidation	6	Q16698,P13804
1	394	1	GO:0046486	BP	glycerolipid metabolic process	5	O60488
1	278	1	GO:0045017	BP	glycerolipid biosynthetic process	6	O60488
1	162	1	GO:0006639	BP	acylglycerol metabolic process	6	O60488
1	88	1	GO:0046463	BP	acylglycerol biosynthetic process	7	O60488
1	153	1	GO:0006641	BP	triglyceride metabolic process	7	O60488
1	86	1	GO:0019432	BP	triglyceride biosynthetic process	8	O60488
0.964	187	3	GO:0044242	BP	cellular lipid catabolic process	5	P51149,Q16698,P13804
1	375	3	GO:0006631	BP	fatty acid metabolic process	5	O60488,Q16698,P13804
1	105	1	GO:0001676	BP	long-chain fatty acid metabolic process	6	O60488
1	96	2	GO:0019395	BP	fatty acid oxidation	6	Q16698,P13804
1	88	2	GO:0009062	BP	fatty acid catabolic process	6	Q16698,P13804
1	70	2	GO:0006635	BP	fatty acid beta-oxidation	7	Q16698,P13804
1	19	1	GO:0033539	BP	fatty acid beta-oxidation using acyl-CoA dehydrogenase	8	P13804
0.00585	273	5	GO:0006413	BP	translational initiation	4	P35268,Q07666,P62913,P62910,P62750
1	347	1	GO:0048511	BP	rhythmic process	2	Q14103
1	212	1	GO:0007623	BP	circadian rhythm	3	Q14103
1	1467	5	GO:0022610	BP	biological adhesion	2	Q9H307,P35268,Q15942,P16615,O60716
1	1461	5	GO:0007155	BP	cell adhesion	3	Q9H307,P35268,Q15942,P16615,O60716
1	782	2	GO:0098602	BP	single organism cell adhesion	4	P35268,O60716
1	311	1	GO:0031589	BP	cell-substrate adhesion	4	Q15942
1	201	1	GO:0007160	BP	cell-matrix adhesion	5	Q15942
1	906	2	GO:0098609	BP	cell-cell adhesion	4	P35268,O60716
1	731	2	GO:0016337	BP	single organismal cell-cell adhesion	5	P35268,O60716
1	525	1	GO:0034109	BP	homotypic cell-cell adhesion	6	P35268
1	492	1	GO:0007159	BP	leukocyte cell-cell adhesion	6	P35268
1	459	1	GO:0070486	BP	leukocyte aggregation	7	P35268
1	452	1	GO:0071593	BP	lymphocyte aggregation	8	P35268
1	451	1	GO:0070489	BP	T cell aggregation	9	P35268
1	451	1	GO:0042110	BP	T cell activation	10	P35268
1	117	1	GO:0046631	BP	alpha-beta T cell activation	11	P35268
1	213	1	GO:0030217	BP	T cell differentiation	11	P35268
1	84	1	GO:0046632	BP	alpha-beta T cell differentiation	12	P35268
1	1004	2	GO:0040007	BP	growth	2	O60488,Q6PD62
1	611	1	GO:0048589	BP	developmental growth	3	Q6PD62
1	23	1	GO:0001832	BP	blastocyst growth	4	Q6PD62
1	497	1	GO:0016049	BP	cell growth	3	O60488
1.23e-05	2473	14	GO:0051704	BP	multi-organism process	2	O60488,Q96EP5,P51149,P52272,Q86U42,P35268,P51151,P09651,P62913,P62910,Q15942,Q13151,P62750,Q6PD62
4.64e-05	841	9	GO:0044419	BP	interspecies interaction between organisms	3	P51149,Q86U42,P35268,P51151,P09651,P62913,P62910,Q15942,P62750
4.64e-05	841	9	GO:0044403	BP	symbiosis, encompassing mutualism through parasitism	4	P51149,Q86U42,P35268,P51151,P09651,P62913,P62910,Q15942,P62750
1	193	1	GO:0051701	BP	interaction with host	4	Q86U42
1	54	1	GO:0051702	BP	interaction with symbiont	4	P51151
0.058	215	4	GO:0044033	BP	multi-organism metabolic process	3	P35268,P62913,P62910,P62750
1	137	2	GO:0035821	BP	modification of morphology or physiology of other organism	3	Q86U42,P51151
1	5	1	GO:0044359	BP	modulation of molecular function in other organism	4	P51151
1	5	1	GO:0044362	BP	negative regulation of molecular function in other organism	5	P51151
1	118	2	GO:0051817	BP	modification of morphology or physiology of other organism involved in symbiotic interaction	4	Q86U42,P51151
1	52	1	GO:0051851	BP	modification by host of symbiont morphology or physiology	5	P51151
1	75	1	GO:0044003	BP	modification by symbiont of host morphology or physiology	5	Q86U42
1	5	1	GO:0052205	BP	modulation of molecular function in other organism involved in symbiotic interaction	5	P51151
1	5	1	GO:0052204	BP	negative regulation of molecular function in other organism involved in symbiotic interaction	6	P51151
1	4	1	GO:0052428	BP	modification by host of symbiont molecular function	6	P51151
1	4	1	GO:0052405	BP	negative regulation by host of symbiont molecular function	7	P51151
1	259	2	GO:0044706	BP	multi-multicellular organism process	3	O60488,Q96EP5
0.000575	814	8	GO:0044764	BP	multi-organism cellular process	3	P51149,Q86U42,P35268,P09651,P62913,P62910,Q15942,P62750
0.000509	801	8	GO:0016032	BP	viral process	4	P51149,Q86U42,P35268,P09651,P62913,P62910,Q15942,P62750
0.00336	447	6	GO:0019058	BP	viral life cycle	5	P51149,Q86U42,P35268,P62913,P62910,P62750
0.0481	205	4	GO:0019080	BP	viral gene expression	6	P35268,P62913,P62910,P62750
0.0388	194	4	GO:0019083	BP	viral transcription	7	P35268,P62913,P62910,P62750
1	35	1	GO:0019076	BP	viral release from host cell	5	P51149
1	66	1	GO:0019048	BP	modulation by virus of host morphology or physiology	5	Q86U42
0.509	8574	17	GO:0050896	BP	response to stimulus	2	O60488,P51149,P35637,P52272,P41223,Q07666,P22626,P18846,P51151,Q14103,Q15942,P16615,Q13151,O94992,O60716,Q6PD62,P07741
1	1747	4	GO:0009719	BP	response to endogenous stimulus	3	Q14103,Q15942,P16615,P07741
1	1312	3	GO:0071495	BP	cellular response to endogenous stimulus	4	Q14103,Q15942,P07741
0.345	4445	12	GO:0042221	BP	response to chemical	3	O60488,P51149,P35637,P52272,P22626,P18846,Q14103,Q15942,P16615,Q13151,Q6PD62,P07741
1	332	1	GO:0001101	BP	response to acid chemical	4	Q14103
1	1660	6	GO:1901700	BP	response to oxygen-containing compound	4	P52272,Q14103,P16615,Q13151,Q6PD62,P07741
1	1087	4	GO:1901698	BP	response to nitrogen compound	4	P22626,Q14103,P16615,P07741
1	97	1	GO:0060359	BP	response to ammonium ion	5	Q14103
1	15	1	GO:1902074	BP	response to salt	4	Q14103
0.0456	3009	11	GO:0010033	BP	response to organic substance	4	O60488,P51149,P52272,P22626,P18846,Q14103,Q15942,P16615,Q13151,Q6PD62,P07741
1	175	1	GO:1901654	BP	response to ketone	5	Q14103
1	5	1	GO:1904587	BP	response to glycoprotein	5	P52272
1	890	3	GO:0014070	BP	response to organic cyclic compound	5	P22626,P18846,Q14103
1	78	1	GO:0043331	BP	response to dsRNA	6	P22626
1	952	2	GO:0070848	BP	response to growth factor	5	P18846,Q15942
1	249	1	GO:0071559	BP	response to transforming growth factor beta	6	Q15942
1	862	2	GO:0034097	BP	response to cytokine	5	O60488,Q6PD62
1	4	1	GO:0070672	BP	response to interleukin-15	6	O60488
1	32	1	GO:0070741	BP	response to interleukin-6	6	Q6PD62
1	873	5	GO:0033993	BP	response to lipid	5	P51149,P52272,Q14103,Q13151,Q6PD62
1	4	1	GO:0061724	BP	lipophagy	6	P51149
1	1080	3	GO:0009725	BP	response to hormone	5	Q14103,P16615,P07741
1	450	1	GO:0048545	BP	response to steroid hormone	6	Q14103
1	225	1	GO:0043627	BP	response to estrogen	7	Q14103
1	11	1	GO:0045472	BP	response to ether	5	Q14103
1	3	1	GO:0014076	BP	response to fluoxetine	6	Q14103
1	380	1	GO:0097305	BP	response to alcohol	5	Q14103
1	149	1	GO:0032355	BP	response to estradiol	6	Q14103
1	998	3	GO:0010243	BP	response to organonitrogen compound	5	Q14103,P16615,P07741
1	1	1	GO:1904585	BP	response to putrescine	6	Q14103
1	652	2	GO:1901652	BP	response to peptide	6	P16615,P07741
1	616	2	GO:0043434	BP	response to peptide hormone	7	P16615,P07741
1	463	1	GO:0032868	BP	response to insulin	8	P07741
1	117	1	GO:0043200	BP	response to amino acid	6	Q14103
1	2	1	GO:1901355	BP	response to rapamycin	6	Q14103
1	519	3	GO:0010035	BP	response to inorganic substance	4	P35637,P18846,Q14103
1	349	3	GO:0010038	BP	response to metal ion	5	P35637,P18846,Q14103
1	12	1	GO:0032025	BP	response to cobalt ion	6	P18846
1	120	2	GO:0051592	BP	response to calcium ion	6	P35637,Q14103
1	2	1	GO:1904383	BP	response to sodium phosphate	5	Q14103
1	984	3	GO:0009607	BP	response to biotic stimulus	3	P52272,Q13151,Q6PD62
1	88	1	GO:0043500	BP	muscle adaptation	3	P16615
1	42	1	GO:0014888	BP	striated muscle adaptation	4	P16615
1	26	1	GO:0043501	BP	skeletal muscle adaptation	5	P16615
1	1226	1	GO:0009628	BP	response to abiotic stimulus	3	Q14103
1	48	1	GO:0051602	BP	response to electrical stimulus	4	Q14103
1	2565	6	GO:0009605	BP	response to external stimulus	3	O60488,P51149,P52272,Q15942,Q13151,Q6PD62
1	947	3	GO:0043207	BP	response to external biotic stimulus	4	P52272,Q13151,Q6PD62
1	947	3	GO:0051707	BP	response to other organism	5	P52272,Q13151,Q6PD62
1	563	3	GO:0009617	BP	response to bacterium	6	P52272,Q13151,Q6PD62
1	343	3	GO:0002237	BP	response to molecule of bacterial origin	5	P52272,Q13151,Q6PD62
1	330	3	GO:0032496	BP	response to lipopolysaccharide	6	P52272,Q13151,Q6PD62
1	552	2	GO:0009991	BP	response to extracellular stimulus	4	O60488,P51149
1	522	2	GO:0031667	BP	response to nutrient levels	5	O60488,P51149
1	205	1	GO:0007584	BP	response to nutrient	6	O60488
1	4101	6	GO:0006950	BP	response to stress	3	P51149,P18846,Q14103,Q15942,P16615,Q13151
1	1867	3	GO:0006952	BP	defense response	4	P18846,Q15942,Q13151
1	656	2	GO:0006954	BP	inflammatory response	5	Q15942,Q13151
1	401	2	GO:0006979	BP	response to oxidative stress	4	Q14103,P16615
1	222	1	GO:0000302	BP	response to reactive oxygen species	5	Q14103
1	23	1	GO:0071731	BP	response to nitric oxide	6	Q14103
1	1078	2	GO:0009611	BP	response to wounding	4	Q15942,P16615
1	753	1	GO:0042060	BP	wound healing	5	P16615
1	573	1	GO:0007596	BP	blood coagulation	6	P16615
1	1728	1	GO:0006955	BP	immune response	3	P18846
1	1140	1	GO:0045087	BP	innate immune response	4	P18846
0.802	7207	15	GO:0051716	BP	cellular response to stimulus	3	P51149,P35637,P52272,P41223,Q07666,P22626,P18846,P51151,Q14103,Q15942,P16615,O94992,O60716,Q6PD62,P07741
1	183	2	GO:0071216	BP	cellular response to biotic stimulus	4	P52272,Q6PD62
1	165	2	GO:0071219	BP	cellular response to molecule of bacterial origin	5	P52272,Q6PD62
0.842	2852	9	GO:0070887	BP	cellular response to chemical stimulus	4	P35637,P52272,P22626,P18846,Q14103,Q15942,P16615,Q6PD62,P07741
1	1102	4	GO:1901701	BP	cellular response to oxygen-containing compound	5	P52272,Q14103,Q6PD62,P07741
1	1	1	GO:1904588	BP	cellular response to glycoprotein	6	P52272
1	1	1	GO:1990831	BP	cellular response to carcinoembryonic antigen	7	P52272
1	184	1	GO:0071229	BP	cellular response to acid chemical	5	Q14103
1	735	3	GO:1901699	BP	cellular response to nitrogen compound	5	P22626,Q14103,P07741
1	21	1	GO:1902170	BP	cellular response to reactive nitrogen species	6	Q14103
1	32	1	GO:0071242	BP	cellular response to ammonium ion	6	Q14103
1	2347	7	GO:0071310	BP	cellular response to organic substance	5	P52272,P22626,P18846,Q14103,Q15942,Q6PD62,P07741
1	126	1	GO:0097306	BP	cellular response to alcohol	6	Q14103
1	425	2	GO:0071407	BP	cellular response to organic cyclic compound	6	P22626,Q14103
1	42	1	GO:0071359	BP	cellular response to dsRNA	7	P22626
1	25	1	GO:0031050	BP	dsRNA fragmentation	8	P22626
1	434	3	GO:0071396	BP	cellular response to lipid	6	P52272,Q14103,Q6PD62
1	158	2	GO:0071222	BP	cellular response to lipopolysaccharide	7	P52272,Q6PD62
1	760	1	GO:0071345	BP	cellular response to cytokine stimulus	6	Q6PD62
1	28	1	GO:0071354	BP	cellular response to interleukin-6	7	Q6PD62
1	927	2	GO:0071363	BP	cellular response to growth factor stimulus	6	P18846,Q15942
1	246	1	GO:0071560	BP	cellular response to transforming growth factor beta stimulus	7	Q15942
1	744	2	GO:0032870	BP	cellular response to hormone stimulus	6	Q14103,P07741
1	168	1	GO:0071383	BP	cellular response to steroid hormone stimulus	7	Q14103
1	42	1	GO:0071391	BP	cellular response to estrogen stimulus	8	Q14103
1	31	1	GO:0071392	BP	cellular response to estradiol stimulus	9	Q14103
1	680	2	GO:0071417	BP	cellular response to organonitrogen compound	6	Q14103,P07741
1	1	1	GO:1904586	BP	cellular response to putrescine	7	Q14103
1	528	1	GO:1901653	BP	cellular response to peptide	7	P07741
1	510	1	GO:0071375	BP	cellular response to peptide hormone stimulus	8	P07741
1	410	1	GO:0032869	BP	cellular response to insulin stimulus	9	P07741
1	55	1	GO:0071230	BP	cellular response to amino acid stimulus	7	Q14103
1	162	2	GO:0071241	BP	cellular response to inorganic substance	5	P35637,Q14103
1	140	1	GO:0071248	BP	cellular response to metal ion	6	P35637
1	50	1	GO:0071277	BP	cellular response to calcium ion	7	P35637
1	1968	4	GO:0033554	BP	cellular response to stress	4	P51149,P18846,Q14103,P16615
1	259	1	GO:0034976	BP	response to endoplasmic reticulum stress	5	P16615
1	229	2	GO:0034599	BP	cellular response to oxidative stress	5	Q14103,P16615
1	133	1	GO:0034614	BP	cellular response to reactive oxygen species	6	Q14103
1	17	1	GO:0071732	BP	cellular response to nitric oxide	7	Q14103
2.05e-07	6327	23	GO:0071840	BP	cellular component organization or biogenesis	2	Q9Y5J1,Q9UKD2,O60488,P51149,O94906,O00567,O60828,Q16698,P17480,P35268,P18846,P09651,P62913,P62910,O00422,Q15942,Q53GS9,P16615,Q6DD88,Q99729,P62750,O60716,Q6PD62
3.24e-05	2671	14	GO:0044085	BP	cellular component biogenesis	3	Q9Y5J1,Q9UKD2,P51149,O94906,O00567,O60828,Q16698,P18846,P62913,Q15942,Q53GS9,Q6DD88,P62750,O60716
1	1400	3	GO:0070271	BP	protein complex biogenesis	4	Q16698,P18846,Q6DD88
1.69e-06	382	8	GO:0022613	BP	ribonucleoprotein complex biogenesis	4	Q9Y5J1,Q9UKD2,O94906,O00567,O60828,P62913,Q53GS9,P62750
0.00281	235	5	GO:0042254	BP	ribosome biogenesis	5	Q9Y5J1,Q9UKD2,O00567,P62913,P62750
0.557	155	3	GO:0006364	BP	rRNA processing	6	Q9Y5J1,O00567,P62913
1	22	1	GO:0000154	BP	rRNA modification	7	O00567
1	43	2	GO:0042273	BP	ribosomal large subunit biogenesis	5	P62913,P62750
4.64e-05	6199	20	GO:0016043	BP	cellular component organization	3	O60488,P51149,O94906,O60828,Q16698,P17480,P35268,P18846,P09651,P62913,P62910,O00422,Q15942,Q53GS9,P16615,Q6DD88,Q99729,P62750,O60716,Q6PD62
2.75e-05	2636	14	GO:0043933	BP	macromolecular complex subunit organization	4	O94906,O60828,Q16698,P17480,P35268,P18846,P62913,P62910,O00422,Q15942,Q53GS9,Q6DD88,P62750,Q6PD62
0.00173	213	5	GO:0071826	BP	ribonucleoprotein complex subunit organization	5	O94906,O60828,P62913,Q53GS9,P62750
0.247	1879	8	GO:0071822	BP	protein complex subunit organization	5	Q16698,P35268,P18846,P62913,P62910,Q15942,Q6DD88,P62750
1	773	4	GO:0022411	BP	cellular component disassembly	4	P35268,P62913,P62910,P62750
0.27	320	4	GO:0032984	BP	macromolecular complex disassembly	5	P35268,P62913,P62910,P62750
0.236	309	4	GO:0043241	BP	protein complex disassembly	6	P35268,P62913,P62910,P62750
0.173	285	4	GO:0043624	BP	cellular protein complex disassembly	7	P35268,P62913,P62910,P62750
0.0283	179	4	GO:0006415	BP	translational termination	8	P35268,P62913,P62910,P62750
1	265	1	GO:0034330	BP	cell junction organization	4	O60716
1	232	1	GO:0045216	BP	cell-cell junction organization	5	O60716
1	121	1	GO:0034332	BP	adherens junction organization	6	O60716
1	1567	2	GO:0032989	BP	cellular component morphogenesis	4	O60828,Q99729
1	1133	1	GO:0032990	BP	cell part morphogenesis	5	O60828
1	1487	2	GO:0000902	BP	cell morphogenesis	5	O60828,Q99729
1	1068	2	GO:0000904	BP	cell morphogenesis involved in differentiation	6	O60828,Q99729
1	848	1	GO:0048667	BP	cell morphogenesis involved in neuron differentiation	7	O60828
1	108	1	GO:0001837	BP	epithelial to mesenchymal transition	7	Q99729
0.588	1129	6	GO:0061024	BP	membrane organization	4	P51149,P35268,P62913,P62910,P16615,P62750
0.189	915	6	GO:0044802	BP	single-organism membrane organization	5	P51149,P35268,P62913,P62910,P16615,P62750
1	497	4	GO:0072657	BP	protein localization to membrane	6	P35268,P62913,P62910,P62750
0.479	372	4	GO:0090150	BP	establishment of protein localization to membrane	7	P35268,P62913,P62910,P62750
0.0437	200	4	GO:0006612	BP	protein targeting to membrane	7	P35268,P62913,P62910,P62750
0.00458	113	4	GO:0006613	BP	cotranslational protein targeting to membrane	8	P35268,P62913,P62910,P62750
0.00411	110	4	GO:0006614	BP	SRP-dependent cotranslational protein targeting to membrane	9	P35268,P62913,P62910,P62750
1	170	1	GO:0061025	BP	membrane fusion	5	P51149
1	142	1	GO:0044801	BP	single-organism membrane fusion	6	P51149
1	546	2	GO:0010256	BP	endomembrane system organization	4	P16615,Q6DD88
1	274	1	GO:0007009	BP	plasma membrane organization	5	P16615
1	3	1	GO:0033292	BP	T-tubule organization	6	P16615
0.302	3711	11	GO:0006996	BP	organelle organization	4	P51149,O60828,P17480,P09651,P62913,O00422,Q15942,P16615,Q6DD88,P62750,Q6PD62
1	2656	4	GO:1902589	BP	single-organism organelle organization	5	P51149,P09651,Q15942,Q6PD62
1	1091	1	GO:0007010	BP	cytoskeleton organization	5	Q15942
1	556	1	GO:0030036	BP	actin cytoskeleton organization	6	Q15942
1	150	1	GO:0031032	BP	actomyosin structure organization	7	Q15942
1	328	1	GO:0007015	BP	actin filament organization	7	Q15942
1	127	1	GO:0061572	BP	actin filament bundle organization	8	Q15942
1	147	1	GO:0007033	BP	vacuole organization	5	P51149
1	51	1	GO:0080171	BP	lytic vacuole organization	6	P51149
1	51	1	GO:0007040	BP	lysosome organization	7	P51149
1	129	1	GO:0048284	BP	organelle fusion	5	P51149
1	102	1	GO:0090174	BP	organelle membrane fusion	6	P51149
1	1126	4	GO:0051276	BP	chromosome organization	5	P17480,P09651,O00422,Q6PD62
1	145	1	GO:0032200	BP	telomere organization	6	P09651
1	132	1	GO:0000723	BP	telomere maintenance	7	P09651
1	84	1	GO:0010833	BP	telomere maintenance via telomere lengthening	8	P09651
1	54	1	GO:0007004	BP	telomere maintenance via telomerase	9	P09651
1	768	3	GO:0006325	BP	chromatin organization	6	P17480,O00422,Q6PD62
1	614	1	GO:0016568	BP	chromatin modification	7	Q6PD62
1	442	1	GO:0016569	BP	covalent chromatin modification	8	Q6PD62
1	429	1	GO:0016570	BP	histone modification	9	Q6PD62
1	40	1	GO:0016574	BP	histone ubiquitination	10	Q6PD62
1	10	1	GO:0033523	BP	histone H2B ubiquitination	11	Q6PD62
1	23	1	GO:0010390	BP	histone monoubiquitination	11	Q6PD62
1	127	1	GO:0016571	BP	histone methylation	10	Q6PD62
1	99	1	GO:0034968	BP	histone lysine methylation	11	Q6PD62
1	53	1	GO:0051568	BP	histone H3-K4 methylation	12	Q6PD62
1	12	1	GO:0080182	BP	histone H3-K4 trimethylation	13	Q6PD62
1	3	1	GO:0034729	BP	histone H3-K79 methylation	12	Q6PD62
1	285	1	GO:0016050	BP	vesicle organization	5	P51149
1	82	1	GO:0006906	BP	vesicle fusion	6	P51149
1	15	1	GO:0090382	BP	phagosome maturation	5	P51149
1	5	1	GO:0090383	BP	phagosome acidification	6	P51149
1	42	1	GO:0007029	BP	endoplasmic reticulum organization	5	Q6DD88
1	92	1	GO:0007030	BP	Golgi organization	5	Q6DD88
0.00729	2476	11	GO:0022607	BP	cellular component assembly	4	P51149,O94906,O60828,Q16698,P18846,P62913,Q15942,Q53GS9,Q6DD88,P62750,O60716
0.0999	1649	8	GO:0065003	BP	macromolecular complex assembly	5	O94906,O60828,Q16698,P18846,P62913,Q53GS9,Q6DD88,P62750
0.198	923	6	GO:0034622	BP	cellular macromolecular complex assembly	6	O94906,O60828,P18846,P62913,Q53GS9,P62750
0.00137	203	5	GO:0022618	BP	ribonucleoprotein complex assembly	7	O94906,O60828,P62913,Q53GS9,P62750
1	56	2	GO:0000245	BP	spliceosomal complex assembly	8	O94906,Q53GS9
1	41	1	GO:0000387	BP	spliceosomal snRNP assembly	8	O94906
1	12	1	GO:0000244	BP	spliceosomal tri-snRNP complex assembly	9	O94906
1	1400	3	GO:0006461	BP	protein complex assembly	6	Q16698,P18846,Q6DD88
1	463	2	GO:0051259	BP	protein oligomerization	7	Q16698,Q6DD88
1	134	1	GO:0051262	BP	protein tetramerization	8	Q16698
1	265	2	GO:0051260	BP	protein homooligomerization	8	Q16698,Q6DD88
1	61	1	GO:0051289	BP	protein homotetramerization	9	Q16698
1	540	1	GO:0043623	BP	cellular protein complex assembly	7	P18846
1	581	4	GO:0070925	BP	organelle assembly	5	P51149,O60828,P62913,P62750
1	72	1	GO:0000045	BP	autophagosome assembly	6	P51149
1	10	1	GO:0034063	BP	stress granule assembly	6	O60828
1	52	2	GO:0042255	BP	ribosome assembly	6	P62913,P62750
0.294	22	2	GO:0000027	BP	ribosomal large subunit assembly	7	P62913,P62750
1	10	1	GO:0001845	BP	phagolysosome assembly	6	P51149
1	5	1	GO:0090385	BP	phagosome-lysosome fusion	7	P51149
1	236	1	GO:0034329	BP	cell junction assembly	5	O60716
1	124	1	GO:0051017	BP	actin filament bundle assembly	5	Q15942
1	82	1	GO:0030038	BP	contractile actin filament bundle assembly	6	Q15942
1	82	1	GO:0043149	BP	stress fiber assembly	7	Q15942
1	1521	3	GO:0030030	BP	cell projection organization	4	O60488,O60828,P18846
1	1113	1	GO:0048858	BP	cell projection morphogenesis	5	O60828
1	228	1	GO:0060271	BP	cilium morphogenesis	6	O60828
1	1125	3	GO:0031175	BP	neuron projection development	5	O60488,O60828,P18846
1	202	2	GO:0016358	BP	dendrite development	6	O60488,O60828
1	71	1	GO:0060996	BP	dendritic spine development	7	O60488
1	881	1	GO:0048812	BP	neuron projection morphogenesis	6	O60828
1	119	1	GO:0048813	BP	dendrite morphogenesis	7	O60828
1	69	1	GO:0099531	BP	presynaptic process involved in synaptic transmission	2	P16615
1	58	1	GO:0016079	BP	synaptic vesicle exocytosis	3	P16615
1	7	1	GO:0048791	BP	calcium ion-regulated exocytosis of neurotransmitter	4	P16615
1	1400	2	GO:0022414	BP	reproductive process	2	O60488,Q96EP5
1	973	2	GO:0044703	BP	multi-organism reproductive process	3	O60488,Q96EP5
1	787	1	GO:0019953	BP	sexual reproduction	4	Q96EP5
1	208	2	GO:0007565	BP	female pregnancy	4	O60488,Q96EP5
1	1257	2	GO:0044702	BP	single organism reproductive process	3	O60488,Q96EP5
1	662	1	GO:0003006	BP	developmental process involved in reproduction	3	Q96EP5
1	456	1	GO:0048608	BP	reproductive structure development	4	Q96EP5
1	155	1	GO:0001890	BP	placenta development	5	Q96EP5
1	799	2	GO:0048609	BP	multicellular organismal reproductive process	3	O60488,Q96EP5
1	630	1	GO:0007276	BP	gamete generation	4	Q96EP5
1	502	1	GO:0048232	BP	male gamete generation	5	Q96EP5
1	501	1	GO:0007283	BP	spermatogenesis	6	Q96EP5
1	64	1	GO:0060135	BP	maternal process involved in female pregnancy	4	Q96EP5
1	33	1	GO:0001893	BP	maternal placenta development	5	Q96EP5
1	7	1	GO:0060136	BP	embryonic process involved in female pregnancy	4	O60488
5.56e-08	10984	30	GO:0050789	BP	regulation of biological process	2	Q15717,O60488,Q96EP5,P51149,P35637,P52272,Q86U42,Q9H307,O94906,O60828,P56270,P41223,P17480,Q07666,P22626,P18846,P51151,P09651,Q14103,O00422,Q15942,P31943,P52597,P16615,Q13151,Q01844,O94992,Q99729,O60716,Q6PD62
1	490	1	GO:0043900	BP	regulation of multi-organism process	3	P51149
1	224	1	GO:0043903	BP	regulation of symbiosis, encompassing mutualism through parasitism	4	P51149
0.121	4652	13	GO:0048519	BP	negative regulation of biological process	3	O60488,P51149,P17480,Q07666,P22626,P09651,Q14103,O00422,P16615,O94992,Q99729,O60716,Q6PD62
1	2603	5	GO:0051239	BP	regulation of multicellular organismal process	3	Q15717,O60828,P18846,P16615,Q6PD62
1	524	1	GO:0044057	BP	regulation of system process	4	P16615
1	307	1	GO:1903522	BP	regulation of blood circulation	5	P16615
1	230	1	GO:0008016	BP	regulation of heart contraction	6	P16615
1	31	1	GO:0002026	BP	regulation of the force of heart contraction	7	P16615
1	89	1	GO:0002027	BP	regulation of heart rate	7	P16615
1	131	1	GO:0061337	BP	cardiac conduction	7	P16615
1	197	1	GO:0090257	BP	regulation of muscle system process	5	P16615
1	148	1	GO:0006937	BP	regulation of muscle contraction	6	P16615
1	76	1	GO:0006942	BP	regulation of striated muscle contraction	7	P16615
1	63	1	GO:0055117	BP	regulation of cardiac muscle contraction	8	P16615
1	1022	2	GO:0051241	BP	negative regulation of multicellular organismal process	4	P16615,Q6PD62
1	39	1	GO:1903523	BP	negative regulation of blood circulation	5	P16615
1	24	1	GO:0045822	BP	negative regulation of heart contraction	6	P16615
1	2414	6	GO:0032879	BP	regulation of localization	3	O60488,P51149,P52272,Q07666,P51151,P16615
1	1776	6	GO:0051049	BP	regulation of transport	4	O60488,P51149,P52272,Q07666,P51151,P16615
1	50	1	GO:0032890	BP	regulation of organic acid transport	5	O60488
1	11	1	GO:0032239	BP	regulation of nucleobase-containing compound transport	5	Q07666
1	66	1	GO:0051588	BP	regulation of neurotransmitter transport	5	P16615
1	477	1	GO:0051051	BP	negative regulation of transport	5	O60488
1	17	1	GO:0032891	BP	negative regulation of organic acid transport	6	O60488
1	701	4	GO:0051046	BP	regulation of secretion	5	O60488,P51149,P51151,P16615
1	202	1	GO:0051048	BP	negative regulation of secretion	6	O60488
1	598	1	GO:0043269	BP	regulation of ion transport	5	O60488
1	130	1	GO:0044070	BP	regulation of anion transport	6	O60488
1	132	1	GO:0043271	BP	negative regulation of ion transport	6	O60488
1	32	1	GO:1903792	BP	negative regulation of anion transport	7	O60488
1	97	1	GO:0032368	BP	regulation of lipid transport	5	O60488
1	28	1	GO:0032369	BP	negative regulation of lipid transport	6	O60488
1	28	1	GO:2000191	BP	regulation of fatty acid transport	6	O60488
1	21	1	GO:0032303	BP	regulation of icosanoid secretion	7	O60488
1	13	1	GO:0032306	BP	regulation of prostaglandin secretion	8	O60488
1	8	1	GO:2000192	BP	negative regulation of fatty acid transport	7	O60488
1	4	1	GO:0032304	BP	negative regulation of icosanoid secretion	8	O60488
1	1	1	GO:0032307	BP	negative regulation of prostaglandin secretion	9	O60488
1	974	2	GO:0032880	BP	regulation of protein localization	4	P52272,P51151
1	833	1	GO:0070201	BP	regulation of establishment of protein localization	5	P52272
1	760	1	GO:0051223	BP	regulation of protein transport	6	P52272
1	183	1	GO:1904589	BP	regulation of protein import	7	P52272
0.000306	5569	18	GO:0048518	BP	positive regulation of biological process	3	Q15717,O60488,Q96EP5,P51149,P52272,O94906,P41223,P17480,Q07666,P18846,P51151,P09651,Q14103,O00422,P16615,O94992,Q99729,Q6PD62
1	170	1	GO:0043902	BP	positive regulation of multi-organism process	4	P51149
1	1453	2	GO:0051240	BP	positive regulation of multicellular organismal process	4	P18846,P16615
1	95	1	GO:1903524	BP	positive regulation of blood circulation	5	P16615
1	35	1	GO:0045823	BP	positive regulation of heart contraction	6	P16615
1	24	1	GO:0010460	BP	positive regulation of heart rate	7	P16615
1	927	4	GO:0051050	BP	positive regulation of transport	4	P51149,P52272,Q07666,P51151
1	3	1	GO:0032241	BP	positive regulation of nucleobase-containing compound transport	5	Q07666
1	367	2	GO:0051047	BP	positive regulation of secretion	5	P51149,P51151
1	444	1	GO:0051222	BP	positive regulation of protein transport	5	P52272
1	102	1	GO:1904591	BP	positive regulation of protein import	6	P52272
1	3740	8	GO:0048583	BP	regulation of response to stimulus	3	P51149,P41223,Q07666,P18846,Q15942,P16615,O94992,O60716
1	1463	3	GO:0080134	BP	regulation of response to stress	4	P51149,P18846,Q15942
1	799	2	GO:0031347	BP	regulation of defense response	5	P18846,Q15942
1	409	1	GO:1903034	BP	regulation of response to wounding	5	Q15942
1	895	2	GO:0032101	BP	regulation of response to external stimulus	4	P51149,Q15942
1	126	1	GO:0032104	BP	regulation of response to extracellular stimulus	5	P51149
1	126	1	GO:0032107	BP	regulation of response to nutrient levels	6	P51149
1	291	1	GO:0050727	BP	regulation of inflammatory response	5	Q15942
1	2072	4	GO:0048584	BP	positive regulation of response to stimulus	4	P41223,Q07666,P18846,O94992
1	440	1	GO:0031349	BP	positive regulation of defense response	5	P18846
1	1399	2	GO:0048585	BP	negative regulation of response to stimulus	4	P51149,O60716
1	65	1	GO:0043502	BP	regulation of muscle adaptation	4	P16615
1	15	1	GO:0014733	BP	regulation of skeletal muscle adaptation	5	P16615
1	8	1	GO:0014883	BP	transition between fast and slow fiber	6	P16615
1	732	1	GO:0044087	BP	regulation of cellular component biogenesis	3	P51149
1	440	1	GO:0032844	BP	regulation of homeostatic process	3	P09651
1	174	1	GO:0032845	BP	negative regulation of homeostatic process	4	P09651
1	207	1	GO:0032846	BP	positive regulation of homeostatic process	4	P09651
1.49e-08	6805	25	GO:0019222	BP	regulation of metabolic process	3	Q15717,Q96EP5,P51149,P35637,Q86U42,Q9H307,O94906,O60828,P56270,P41223,P17480,Q07666,P22626,P18846,P09651,Q14103,O00422,P31943,P52597,Q13151,Q01844,O94992,Q99729,O60716,Q6PD62
5.39e-09	5882	24	GO:0080090	BP	regulation of primary metabolic process	4	Q15717,Q96EP5,P51149,P35637,Q86U42,Q9H307,O94906,O60828,P56270,P41223,P17480,Q07666,P22626,P18846,P09651,Q14103,O00422,P31943,P52597,Q01844,O94992,Q99729,O60716,Q6PD62
1	694	1	GO:0009894	BP	regulation of catabolic process	4	P51149
6.67e-07	4292	19	GO:0009889	BP	regulation of biosynthetic process	4	Q15717,P35637,Q9H307,O94906,O60828,P56270,P41223,P17480,Q07666,P22626,P18846,P09651,Q14103,O00422,Q01844,O94992,Q99729,O60716,Q6PD62
6e-10	5894	25	GO:0060255	BP	regulation of macromolecule metabolic process	4	Q15717,Q96EP5,P51149,P35637,Q86U42,Q9H307,O94906,O60828,P56270,P41223,P17480,Q07666,P22626,P18846,P09651,Q14103,O00422,P31943,P52597,Q13151,Q01844,O94992,Q99729,O60716,Q6PD62
2.61e-07	4061	19	GO:0010556	BP	regulation of macromolecule biosynthetic process	5	Q15717,P35637,Q9H307,O94906,O60828,P56270,P41223,P17480,Q07666,P22626,P18846,P09651,Q14103,O00422,Q01844,O94992,Q99729,O60716,Q6PD62
8.98e-10	4330	22	GO:0010468	BP	regulation of gene expression	5	Q15717,Q96EP5,Q86U42,Q9H307,O94906,O60828,P56270,P41223,P17480,Q07666,P22626,P18846,Q14103,O00422,P31943,P52597,Q13151,Q01844,O94992,Q99729,O60716,Q6PD62
0.0676	454	5	GO:0010608	BP	posttranscriptional regulation of gene expression	6	Q15717,Q07666,P22626,Q14103,Q13151
0.44	143	3	GO:0043487	BP	regulation of RNA stability	7	Q15717,Q14103,Q13151
0.00642	35	3	GO:0043489	BP	RNA stabilization	8	Q15717,Q14103,Q13151
0.405	139	3	GO:0043488	BP	regulation of mRNA stability	8	Q15717,Q14103,Q13151
0.00587	34	3	GO:0048255	BP	mRNA stabilization	9	Q15717,Q14103,Q13151
0.116	14	2	GO:0070935	BP	3'-UTR-mediated mRNA stabilization	10	Q15717,Q13151
1	15	1	GO:0050779	BP	RNA destabilization	8	Q14103
1	308	3	GO:0040029	BP	regulation of gene expression, epigenetic	6	P17480,P22626,O00422
1	2653	7	GO:0051246	BP	regulation of protein metabolic process	5	Q15717,P51149,Q07666,P22626,Q14103,O94992,Q6PD62
1	404	1	GO:0042176	BP	regulation of protein catabolic process	6	P51149
1	27	1	GO:0071514	BP	genetic imprinting	5	Q6PD62
0.635	2744	9	GO:0009892	BP	negative regulation of metabolic process	4	P17480,Q07666,P22626,P09651,Q14103,O00422,O94992,Q99729,Q6PD62
0.289	2468	9	GO:0010605	BP	negative regulation of macromolecule metabolic process	5	P17480,Q07666,P22626,P09651,Q14103,O00422,O94992,Q99729,Q6PD62
0.0701	1568	8	GO:0010629	BP	negative regulation of gene expression	6	P17480,Q07666,P22626,Q14103,O00422,O94992,Q99729,Q6PD62
1	166	2	GO:0045814	BP	negative regulation of gene expression, epigenetic	7	P17480,O00422
1	244	2	GO:0016458	BP	gene silencing	7	P17480,P22626
1	149	1	GO:0031047	BP	gene silencing by RNA	8	P22626
1	25	1	GO:0070918	BP	production of small RNA involved in gene silencing by RNA	9	P22626
1	48	1	GO:0016441	BP	posttranscriptional gene silencing	8	P22626
1	48	1	GO:0035194	BP	posttranscriptional gene silencing by RNA	9	P22626
1	1126	3	GO:0051248	BP	negative regulation of protein metabolic process	6	P22626,Q14103,O94992
0.00794	1559	9	GO:0009890	BP	negative regulation of biosynthetic process	5	P17480,Q07666,P22626,P09651,Q14103,O00422,O94992,Q99729,Q6PD62
0.00507	1475	9	GO:0010558	BP	negative regulation of macromolecule biosynthetic process	6	P17480,Q07666,P22626,P09651,Q14103,O00422,O94992,Q99729,Q6PD62
0.0532	3661	12	GO:0009893	BP	positive regulation of metabolic process	4	Q15717,Q96EP5,P51149,O94906,P41223,P17480,Q07666,P18846,P09651,Q14103,Q99729,Q6PD62
0.00582	2940	12	GO:0010604	BP	positive regulation of macromolecule metabolic process	5	Q15717,Q96EP5,P51149,O94906,P41223,P17480,Q07666,P18846,P09651,Q14103,Q99729,Q6PD62
0.00283	1787	10	GO:0010628	BP	positive regulation of gene expression	6	Q15717,Q96EP5,O94906,P41223,P17480,Q07666,P18846,Q14103,Q99729,Q6PD62
1	1592	5	GO:0051247	BP	positive regulation of protein metabolic process	6	Q15717,P51149,Q07666,Q14103,Q6PD62
0.00368	1840	10	GO:0009891	BP	positive regulation of biosynthetic process	5	Q15717,O94906,P41223,P17480,Q07666,P18846,P09651,Q14103,Q99729,Q6PD62
0.00163	1680	10	GO:0010557	BP	positive regulation of macromolecule biosynthetic process	6	Q15717,O94906,P41223,P17480,Q07666,P18846,P09651,Q14103,Q99729,Q6PD62
1	390	1	GO:0009896	BP	positive regulation of catabolic process	5	P51149
1	262	1	GO:0045732	BP	positive regulation of protein catabolic process	6	P51149
1	2378	1	GO:0050790	BP	regulation of catalytic activity	4	O94992
1	1058	1	GO:0051338	BP	regulation of transferase activity	5	O94992
1	873	1	GO:0043086	BP	negative regulation of catalytic activity	5	O94992
1	372	1	GO:0051348	BP	negative regulation of transferase activity	6	O94992
8.68e-11	4346	23	GO:0051171	BP	regulation of nitrogen compound metabolic process	4	Q15717,Q96EP5,P35637,Q86U42,Q9H307,O94906,O60828,P56270,P41223,P17480,Q07666,P22626,P18846,P09651,Q14103,O00422,P31943,P52597,Q01844,O94992,Q99729,O60716,Q6PD62
0.000374	1827	11	GO:0051173	BP	positive regulation of nitrogen compound metabolic process	5	Q15717,Q96EP5,O94906,P41223,P17480,Q07666,P18846,P09651,Q14103,Q99729,Q6PD62
0.00815	1564	9	GO:0051172	BP	negative regulation of nitrogen compound metabolic process	5	P17480,Q07666,P22626,P09651,Q14103,O00422,O94992,Q99729,Q6PD62
1	2175	4	GO:0050793	BP	regulation of developmental process	3	Q15717,O60828,P18846,Q6PD62
1	924	1	GO:0022603	BP	regulation of anatomical structure morphogenesis	4	O60828
1	826	1	GO:0051093	BP	negative regulation of developmental process	4	Q6PD62
1	1631	3	GO:2000026	BP	regulation of multicellular organismal development	4	O60828,P18846,Q6PD62
1	762	2	GO:0051960	BP	regulation of nervous system development	5	O60828,P18846
1	1175	1	GO:0051094	BP	positive regulation of developmental process	4	P18846
1	444	1	GO:0051962	BP	positive regulation of nervous system development	5	P18846
1	3034	6	GO:0023051	BP	regulation of signaling	3	P51149,P41223,Q07666,P16615,O94992,O60716
1	1608	3	GO:0023056	BP	positive regulation of signaling	4	P41223,Q07666,O94992
1	1219	2	GO:0023057	BP	negative regulation of signaling	4	P51149,O60716
1	67	1	GO:1903779	BP	regulation of cardiac conduction	4	P16615
1	1562	2	GO:0002682	BP	regulation of immune system process	3	P18846,Q6PD62
1	955	1	GO:0002684	BP	positive regulation of immune system process	4	P18846
1	374	1	GO:0002683	BP	negative regulation of immune system process	4	Q6PD62
1	1024	1	GO:0050776	BP	regulation of immune response	4	P18846
1	682	1	GO:0050778	BP	positive regulation of immune response	5	P18846
1	545	1	GO:0002253	BP	activation of immune response	6	P18846
1	405	1	GO:0045088	BP	regulation of innate immune response	5	P18846
1	337	1	GO:0045089	BP	positive regulation of innate immune response	6	P18846
1	292	1	GO:0002218	BP	activation of innate immune response	7	P18846
1	327	1	GO:1903706	BP	regulation of hemopoiesis	4	Q6PD62
1	132	1	GO:1903707	BP	negative regulation of hemopoiesis	5	Q6PD62
1	658	1	GO:0040008	BP	regulation of growth	3	O60488
1	248	1	GO:0045927	BP	positive regulation of growth	4	O60488
1.01e-07	10414	29	GO:0050794	BP	regulation of cellular process	3	Q15717,O60488,Q96EP5,P51149,P35637,P52272,Q86U42,Q9H307,O94906,O60828,P56270,P41223,P17480,Q07666,P22626,P18846,P51151,P09651,Q14103,O00422,Q15942,P31943,P52597,P16615,Q01844,O94992,Q99729,O60716,Q6PD62
1	57	1	GO:0044068	BP	modulation by symbiont of host cellular process	4	Q86U42
1	54	1	GO:0019054	BP	modulation by virus of host process	5	Q86U42
1	3	1	GO:0039656	BP	modulation by virus of host gene expression	6	Q86U42
1	650	1	GO:0080135	BP	regulation of cellular response to stress	4	P51149
0.00019	4770	17	GO:0048522	BP	positive regulation of cellular process	4	Q15717,O60488,Q96EP5,P51149,P52272,O94906,P41223,P17480,Q07666,P18846,P51151,P09651,Q14103,O00422,O94992,Q99729,Q6PD62
1	4275	11	GO:0048523	BP	negative regulation of cellular process	4	P51149,P17480,Q07666,P22626,P09651,Q14103,O00422,O94992,Q99729,O60716,Q6PD62
1	2207	6	GO:0051128	BP	regulation of cellular component organization	4	O60488,P51149,O60828,P18846,P09651,Q6PD62
1	629	1	GO:0051129	BP	negative regulation of cellular component organization	5	P09651
1	1083	3	GO:0033043	BP	regulation of organelle organization	5	P51149,P09651,Q6PD62
1	324	1	GO:0010639	BP	negative regulation of organelle organization	6	P09651
1	290	2	GO:0033044	BP	regulation of chromosome organization	6	P09651,Q6PD62
1	152	1	GO:1902275	BP	regulation of chromatin organization	7	Q6PD62
1	145	1	GO:1903308	BP	regulation of chromatin modification	8	Q6PD62
1	124	1	GO:2001251	BP	negative regulation of chromosome organization	7	P09651
1	38	1	GO:0044088	BP	regulation of vacuole organization	6	P51149
1	114	1	GO:1902115	BP	regulation of organelle assembly	6	P51149
1	1142	3	GO:0051130	BP	positive regulation of cellular component organization	5	P18846,P09651,Q6PD62
1	582	2	GO:0010638	BP	positive regulation of organelle organization	6	P09651,Q6PD62
1	142	2	GO:2001252	BP	positive regulation of chromosome organization	7	P09651,Q6PD62
1	83	1	GO:1903310	BP	positive regulation of chromatin modification	8	Q6PD62
1	528	2	GO:0031344	BP	regulation of cell projection organization	5	O60828,P18846
1	301	1	GO:0031346	BP	positive regulation of cell projection organization	6	P18846
1	395	1	GO:0001558	BP	regulation of cell growth	5	O60488
1	151	1	GO:0030307	BP	positive regulation of cell growth	6	O60488
1	516	1	GO:0022604	BP	regulation of cell morphogenesis	5	O60828
1	1040	2	GO:0051726	BP	regulation of cell cycle	4	Q07666,O94992
1	500	2	GO:0045786	BP	negative regulation of cell cycle	5	Q07666,O94992
1	254	1	GO:0007050	BP	cell cycle arrest	6	Q07666
1	3048	6	GO:0010646	BP	regulation of cell communication	4	P51149,P41223,Q07666,P16615,O94992,O60716
1	1232	2	GO:0010648	BP	negative regulation of cell communication	5	P51149,O60716
1	1627	3	GO:0010647	BP	positive regulation of cell communication	5	P41223,Q07666,O94992
1	287	1	GO:0050804	BP	modulation of synaptic transmission	5	P16615
7.26e-09	5964	24	GO:0031323	BP	regulation of cellular metabolic process	4	Q15717,Q96EP5,P51149,P35637,Q86U42,Q9H307,O94906,O60828,P56270,P41223,P17480,Q07666,P22626,P18846,P09651,Q14103,O00422,P31943,P52597,Q01844,O94992,Q99729,O60716,Q6PD62
5.6e-07	4248	19	GO:0031326	BP	regulation of cellular biosynthetic process	5	Q15717,P35637,Q9H307,O94906,O60828,P56270,P41223,P17480,Q07666,P22626,P18846,P09651,Q14103,O00422,Q01844,O94992,Q99729,O60716,Q6PD62
1.44e-06	3949	18	GO:2000112	BP	regulation of cellular macromolecule biosynthetic process	6	Q15717,Q9H307,O94906,O60828,P56270,P41223,P17480,Q07666,P22626,P18846,P09651,Q14103,O00422,Q01844,O94992,Q99729,O60716,Q6PD62
0.397	354	4	GO:0034248	BP	regulation of cellular amide metabolic process	5	Q15717,Q07666,P22626,Q14103
1	584	1	GO:0031329	BP	regulation of cellular catabolic process	5	P51149
1	198	1	GO:0010506	BP	regulation of autophagy	6	P51149
1	101	1	GO:0016241	BP	regulation of macroautophagy	7	P51149
1	31	1	GO:2000785	BP	regulation of autophagosome assembly	8	P51149
2.29e-10	4046	22	GO:0019219	BP	regulation of nucleobase-containing compound metabolic process	5	Q96EP5,P35637,Q86U42,Q9H307,O94906,O60828,P56270,P41223,P17480,Q07666,P22626,P18846,P09651,Q14103,O00422,P31943,P52597,Q01844,O94992,Q99729,O60716,Q6PD62
1	341	2	GO:0051052	BP	regulation of DNA metabolic process	6	P18846,P09651
1	158	2	GO:0006275	BP	regulation of DNA replication	7	P18846,P09651
1	67	1	GO:0032204	BP	regulation of telomere maintenance	7	P09651
1	50	1	GO:1904356	BP	regulation of telomere maintenance via telomere lengthening	8	P09651
1	45	1	GO:0032210	BP	regulation of telomere maintenance via telomerase	9	P09651
1	6	1	GO:2000653	BP	regulation of genetic imprinting	6	Q6PD62
5.05e-10	3720	21	GO:0051252	BP	regulation of RNA metabolic process	6	Q96EP5,P35637,Q86U42,Q9H307,O94906,O60828,P56270,P41223,P17480,Q07666,P22626,P18846,Q14103,O00422,P31943,P52597,Q01844,O94992,Q99729,O60716,Q6PD62
7.76e-05	114	5	GO:1903311	BP	regulation of mRNA metabolic process	7	Q96EP5,Q86U42,P22626,O00422,Q6PD62
3.81e-05	99	5	GO:0050684	BP	regulation of mRNA processing	8	Q96EP5,Q86U42,P22626,O00422,Q6PD62
1	28	1	GO:0031440	BP	regulation of mRNA 3'-end processing	9	Q6PD62
1	9	1	GO:1900363	BP	regulation of mRNA polyadenylation	10	Q6PD62
1	2	1	GO:0046778	BP	modification by virus of host mRNA processing	9	Q86U42
3.17e-07	94	6	GO:0043484	BP	regulation of RNA splicing	7	Q96EP5,O60828,P22626,O00422,P31943,P52597
0.0331	60	3	GO:0048024	BP	regulation of mRNA splicing, via spliceosome	8	Q96EP5,P22626,O00422
1	31	1	GO:0000381	BP	regulation of alternative mRNA splicing, via spliceosome	9	O00422
3.19e-06	3620	17	GO:2001141	BP	regulation of RNA biosynthetic process	7	P35637,Q9H307,O94906,O60828,P56270,P41223,P17480,Q07666,P22626,P18846,Q14103,O00422,Q01844,O94992,Q99729,O60716,Q6PD62
2.95e-06	3601	17	GO:1903506	BP	regulation of nucleic acid-templated transcription	8	P35637,Q9H307,O94906,O60828,P56270,P41223,P17480,Q07666,P22626,P18846,Q14103,O00422,Q01844,O94992,Q99729,O60716,Q6PD62
2.25e-05	3581	16	GO:0006355	BP	regulation of transcription, DNA-templated	9	Q9H307,O94906,O60828,P56270,P41223,P17480,Q07666,P22626,P18846,Q14103,O00422,Q01844,O94992,Q99729,O60716,Q6PD62
0.0275	1821	9	GO:0006357	BP	regulation of transcription from RNA polymerase II promoter	10	O94906,P56270,P41223,P22626,P18846,O00422,O94992,Q99729,Q6PD62
1	372	1	GO:0051090	BP	regulation of sequence-specific DNA binding transcription factor activity	10	P41223
1	25	1	GO:0006356	BP	regulation of transcription from RNA polymerase I promoter	10	P17480
1	45	1	GO:0032784	BP	regulation of DNA-templated transcription, elongation	10	Q6PD62
1	25	1	GO:0034243	BP	regulation of transcription elongation from RNA polymerase II promoter	11	Q6PD62
1	1758	1	GO:0051174	BP	regulation of phosphorus metabolic process	5	O94992
1	1745	1	GO:0019220	BP	regulation of phosphate metabolic process	6	O94992
1	1506	1	GO:0042325	BP	regulation of phosphorylation	7	O94992
1	933	1	GO:0043549	BP	regulation of kinase activity	8	O94992
0.262	2437	9	GO:0031324	BP	negative regulation of cellular metabolic process	5	P17480,Q07666,P22626,P09651,Q14103,O00422,O94992,Q99729,Q6PD62
1	552	1	GO:0010563	BP	negative regulation of phosphorus metabolic process	6	O94992
1	552	1	GO:0045936	BP	negative regulation of phosphate metabolic process	7	O94992
1	427	1	GO:0042326	BP	negative regulation of phosphorylation	8	O94992
1	253	1	GO:0033673	BP	negative regulation of kinase activity	9	O94992
1	137	2	GO:0034249	BP	negative regulation of cellular amide metabolic process	6	P22626,Q14103
0.039	1444	8	GO:0045934	BP	negative regulation of nucleobase-containing compound metabolic process	6	P17480,Q07666,P22626,P09651,O00422,O94992,Q99729,Q6PD62
0.168	1307	7	GO:0051253	BP	negative regulation of RNA metabolic process	7	P17480,Q07666,P22626,O00422,O94992,Q99729,Q6PD62
0.00761	37	3	GO:1903312	BP	negative regulation of mRNA metabolic process	8	P22626,O00422,Q6PD62
0.00487	32	3	GO:0050686	BP	negative regulation of mRNA processing	9	P22626,O00422,Q6PD62
1	10	1	GO:0031441	BP	negative regulation of mRNA 3'-end processing	10	Q6PD62
1	8	1	GO:1900364	BP	negative regulation of mRNA polyadenylation	11	Q6PD62
0.412	26	2	GO:0033119	BP	negative regulation of RNA splicing	8	P22626,O00422
0.267	21	2	GO:0048025	BP	negative regulation of mRNA splicing, via spliceosome	9	P22626,O00422
1	111	1	GO:0051053	BP	negative regulation of DNA metabolic process	7	P09651
1	26	1	GO:0032205	BP	negative regulation of telomere maintenance	8	P09651
1	17	1	GO:1904357	BP	negative regulation of telomere maintenance via telomere lengthening	9	P09651
0.00704	1536	9	GO:0031327	BP	negative regulation of cellular biosynthetic process	6	P17480,Q07666,P22626,P09651,Q14103,O00422,O94992,Q99729,Q6PD62
0.0288	1384	8	GO:2000113	BP	negative regulation of cellular macromolecule biosynthetic process	7	P17480,Q07666,P22626,P09651,Q14103,O94992,Q99729,Q6PD62
1	55	1	GO:0008156	BP	negative regulation of DNA replication	8	P09651
[truncated: 676 more rows]

## Sheet: Trn-SR
Trn-SR 3rd-Z-4% Cargoes (63 Proteins)
[truncated: 2,122 more rows]

## Sheet: Imp-4
Imp-4 3rd-Z-4% Cargoes (49 Proteins)
[truncated: 2,229 more rows]

[truncated: 7 more sheets: Imp-5, imp-7, Imp-8, Imp-9, Imp-11, Imp-13, Exp-4]
