# Supplementary material for: Extensive cargo identification reveals distinct biological roles of the 12 importin pathways
Source: eLife. 2017 Jan 24;6:e21184. doi: 10.7554/eLife.21184 (PMC5305215; doi:10.7554/eLife.21184)
Supplement: Supplementary file 8. — With respect to each NTR, the accessions of the 2nd-Z-15% cargoes annotated with each GO term are listed. Cyan, significant term enrichment (p<0.05) in the 2nd-Z-15% cargoes of the NTR. Total No. represents the number of proteins annotated with each term in the database. Supplementary files 6C and 10 were derived from this table. For the 3nd-Z-4% cargoes, see Supplementary file 7. DOI: http://dx.doi.org/10.7554/eLife.21184.024 [file elife-21184-supp8.xlsx]

## Sheet: Legend
Supplementary file 8
The 2nd-Z-15% cargoes annotated with Gene Ontology (GO) terms
With respect to each NTR, the accessions of the 2nd-Z-15% cargoes annotated with each GO term are listed. Cyan, significant term enrichment (p<0.05) in the 2nd-Z-15% cargoes of the NTR. Total No. represents the number of proteins annotated with each term in the database. Supplementary files 6C and 10 were derived from this table. For the 3nd-Z-4% cargoes, see Supplementary file 7.
Imp-β	Trn-1	Trn-2	Trn-SR	Imp-4	Imp-5
Imp-7	Imp-8	Imp-9	Imp-11	Imp-13	Exp-4
(13 sheets including this one)

## Sheet: Imp-β
Imp-β 2nd-Z-15% Cargoes (303 Proteins)
p-Value	Total No.	No. of 2nd-Z-15% Cargoes	Term ID	Term Type	Term Name	Term Depth	Accession
7.51e-141	16994	289	GO:0008150	BP	biological_process	1	P23511,P53701,O75223,Q9NQ29,Q9UIG0,P31930,Q9Y5J1,Q9NQW6,O95394,P51948,P49959,Q13642,Q14126,Q9Y3C1,Q8IX12,O75390,P26368,P04181,Q9BV38,Q15717,Q96CN7,Q92917,Q13428,O43709,O15460,P31040,Q969G3,O75530,Q00325,Q15054,Q13362,Q96FV9,Q9NTI5,P55809,Q96MU7,Q9Y2W2,P40939,Q8IWX8,Q9NW64,Q9BXP5,Q92945,Q9ULW0,P30086,P35637,Q15773,Q9P2N5,Q9UKY7,Q6P6C2,Q9Y5N6,O00161,Q5SRE5,Q69YN2,Q99459,Q96RN5,O00541,P61218,Q92841,…
6.98e-131	12055	257	GO:0008152	BP	metabolic process	2	P23511,P53701,O75223,Q9NQ29,Q9UIG0,P31930,Q9Y5J1,O95394,P51948,P49959,Q8IX12,O75390,P26368,P04181,Q15717,Q96CN7,Q13428,O43709,O15460,P31040,Q969G3,O75530,Q00325,Q15054,Q13362,Q96FV9,P55809,Q96MU7,Q9Y2W2,P40939,Q8IWX8,Q9NW64,Q9BXP5,Q92945,Q9ULW0,P30086,P35637,Q9P2N5,Q6P6C2,Q9Y5N6,Q5SRE5,Q69YN2,Q99459,Q96RN5,O00541,P61218,Q92841,Q96EK6,Q13573,Q6PJT7,Q9UKV3,P27695,Q9HCK8,Q9H307,P78406,Q9NV56,O43148,…
8.66e-119	10482	237	GO:0044238	BP	primary metabolic process	3	P23511,Q9NQ29,Q9UIG0,P31930,Q9Y5J1,O95394,P51948,P49959,Q8IX12,O75390,P26368,P04181,Q15717,Q13428,O43709,O15460,P31040,Q969G3,O75530,Q00325,Q15054,Q13362,Q96FV9,P55809,Q96MU7,Q9Y2W2,P40939,Q8IWX8,Q9NW64,Q9BXP5,Q92945,Q9ULW0,P30086,P35637,Q9P2N5,Q6P6C2,Q9Y5N6,Q5SRE5,Q99459,Q96RN5,O00541,P61218,Q92841,Q96EK6,Q13573,Q6PJT7,Q9UKV3,P27695,Q9HCK8,Q9H307,P78406,Q9NV56,O43148,O43719,Q8N1F7,P49711,P56270,…
1.18e-09	367	18	GO:0032259	BP	methylation	3	O43709,O75530,Q13573,O43148,P49711,Q7KZ85,P46087,Q9NRZ9,Q92979,Q96P11,Q8WXI9,Q9BV86,Q86YP4,Q9BTL3,Q7L0Y3,Q9H3P2,P62805,Q6PD62
1.26e-120	6922	208	GO:0006807	BP	nitrogen compound metabolic process	3	P23511,O75223,Q9NQ29,Q9UIG0,P31930,Q9Y5J1,O95394,P51948,P49959,Q8IX12,P26368,P04181,Q15717,Q13428,O43709,O15460,Q969G3,O75530,Q00325,Q15054,Q96FV9,Q96MU7,Q9Y2W2,Q8IWX8,Q9NW64,Q9BXP5,Q92945,P35637,Q9P2N5,Q6P6C2,Q9Y5N6,Q5SRE5,Q99459,Q96RN5,O00541,P61218,Q92841,Q96EK6,Q13573,Q6PJT7,Q9UKV3,P27695,Q9HCK8,Q9H307,P78406,Q9NV56,O43148,O43719,Q8N1F7,P49711,P56270,O75822,P08621,P06732,Q02218,P49005,Q9Y657,…
1	182	2	GO:0097164	BP	ammonium ion metabolic process	4	P50416,O95573
1	87	1	GO:2001057	BP	reactive nitrogen species metabolic process	4	P00533
7.43e-121	10808	241	GO:0071704	BP	organic substance metabolic process	3	P23511,O75223,Q9NQ29,Q9UIG0,P31930,Q9Y5J1,O95394,P51948,P49959,Q8IX12,O75390,P26368,P04181,Q15717,Q13428,O43709,O15460,P31040,Q969G3,O75530,Q00325,Q15054,Q13362,Q96FV9,P55809,Q96MU7,Q9Y2W2,P40939,Q8IWX8,Q9NW64,Q9BXP5,Q92945,Q9ULW0,P30086,P35637,Q9P2N5,Q6P6C2,Q9Y5N6,Q5SRE5,Q99459,Q96RN5,O00541,P61218,Q92841,Q96EK6,Q13573,Q6PJT7,Q9UKV3,P27695,Q9HCK8,Q9H307,P78406,Q9NV56,O43148,O43719,Q8N1F7,P49711,…
0.42	1381	18	GO:1901135	BP	carbohydrate derivative metabolic process	4	P31930,O95394,Q96EK6,Q02218,P06576,O43598,Q16222,Q16718,Q9HCC0,P15586,P09038,Q00610,Q10471,P46013,P25705,P52789,P04843,P08174
1	41	3	GO:0006040	BP	amino sugar metabolic process	5	O95394,Q96EK6,Q16222
1	27	2	GO:1901071	BP	glucosamine-containing compound metabolic process	6	O95394,Q96EK6
0.482	5	2	GO:0006041	BP	glucosamine metabolic process	7	O95394,Q96EK6
1	18	1	GO:0006044	BP	N-acetylglucosamine metabolic process	7	Q96EK6
1	11	1	GO:1902224	BP	ketone body metabolic process	4	P55809
3.83e-101	9286	213	GO:0043170	BP	macromolecule metabolic process	4	P23511,Q9NQ29,Q9UIG0,P31930,Q9Y5J1,O95394,P51948,P49959,Q8IX12,P26368,Q15717,Q13428,O43709,O15460,Q969G3,O75530,Q00325,Q15054,Q13362,Q96FV9,Q96MU7,Q9Y2W2,Q8IWX8,Q9NW64,Q9BXP5,Q92945,Q9ULW0,P30086,P35637,Q9P2N5,Q6P6C2,Q9Y5N6,Q5SRE5,Q99459,Q96RN5,O00541,P61218,Q92841,Q96EK6,Q13573,Q6PJT7,Q9UKV3,P27695,Q9HCK8,Q9H307,P78406,Q9NV56,O43148,O43719,Q8N1F7,P49711,P56270,O75822,P08621,P49005,Q9Y657,Q5JRX3,…
6.57e-18	4139	72	GO:0043412	BP	macromolecule modification	5	Q9UIG0,O95394,P51948,P49959,O15460,O75530,Q13362,Q9ULW0,P30086,Q6P6C2,Q5SRE5,Q96EK6,Q13573,P27695,P78406,Q9NV56,O43148,Q8N1F7,P49711,Q99567,Q7KZ85,O14519,P57740,P23246,Q16222,Q9NRZ9,P13674,Q15014,Q92979,P35658,Q5T4S7,Q8NBJ7,Q9NVN8,O60832,P61289,Q9H0C8,P51946,P40818,P09038,Q9Y6I4,Q96G46,O00622,O43768,Q8WXI9,Q10471,O75915,P00533,Q9BV86,P49792,Q6YHK3,P55265,P04843,Q8WVY7,Q9NV06,P30048,Q8IZ73,P35232,…
1	87	3	GO:0098732	BP	macromolecule deacylation	6	P23246,Q15014,P35232
4.2e-94	5430	170	GO:0010467	BP	gene expression	5	P23511,Q9NQ29,Q9UIG0,P31930,Q9Y5J1,P51948,Q8IX12,P26368,Q15717,Q13428,O43709,Q969G3,O75530,Q00325,Q13362,Q96FV9,Q96MU7,Q9Y2W2,Q8IWX8,Q9NW64,Q9BXP5,Q92945,P35637,Q9P2N5,Q6P6C2,Q5SRE5,Q99459,Q96RN5,O00541,P61218,Q92841,Q13573,Q6PJT7,Q9UKV3,P27695,Q9HCK8,Q9H307,P78406,Q9NV56,O43148,O43719,Q8N1F7,P49711,P56270,O75822,P08621,Q9Y657,Q5JRX3,Q99567,P17844,O95232,Q7KZ85,P57740,Q16630,P46087,P84103,P53999,…
7.41e-18	5770	86	GO:0019538	BP	protein metabolic process	5	Q9UIG0,P31930,O95394,P51948,P49959,Q15717,O15460,O75530,Q00325,Q13362,Q9BXP5,Q9ULW0,P30086,Q5SRE5,Q96EK6,Q13573,P78406,Q9NV56,Q8N1F7,P49711,O75822,P08621,Q5JRX3,Q99567,Q7KZ85,O14519,P57740,P52298,P23246,Q16222,Q6PI48,P07339,P22626,P13674,Q15014,Q12931,P35658,O60220,Q5T4S7,Q8NBJ7,Q9NVN8,P61289,Q9H0C8,P51946,Q09161,P40818,P09038,Q9Y6I4,Q86TI2,O00622,O43768,Q10471,P49458,P10809,O75915,P00533,P38159,…
0.00513	1632	24	GO:0006508	BP	proteolysis	6	P31930,Q13362,P30086,Q5JRX3,P07339,Q5T4S7,P61289,P40818,Q9Y6I4,Q86TI2,O00622,P10809,O75915,P38159,Q6YHK3,P30048,Q10713,P35232,P34897,Q13330,P08174,P36776,P07203,O75340
1	55	1	GO:0033619	BP	membrane protein proteolysis	7	P38159
1	39	1	GO:0006509	BP	membrane protein ectodomain proteolysis	8	P38159
3.61e-12	3959	61	GO:0036211	BP	protein modification process	6	Q9UIG0,O95394,P51948,P49959,O15460,O75530,Q13362,Q9ULW0,P30086,Q5SRE5,Q96EK6,Q13573,P78406,Q9NV56,Q8N1F7,P49711,Q99567,Q7KZ85,O14519,P57740,P23246,Q16222,P13674,Q15014,P35658,Q5T4S7,Q8NBJ7,Q9NVN8,P61289,Q9H0C8,P51946,P40818,P09038,Q9Y6I4,O00622,O43768,Q10471,O75915,P00533,Q9BV86,P49792,Q6YHK3,P55265,P04843,Q8WVY7,Q9NV06,P30048,P35232,O95400,P17706,P49761,P34897,Q13330,Q9H3P2,P08174,P62805,Q86U70,…
0.84	354	8	GO:0051604	BP	protein maturation	6	P31930,Q13362,Q5JRX3,P10809,Q10713,P35232,P08174,O75340
0.506	328	8	GO:0016485	BP	protein processing	7	P31930,Q13362,Q5JRX3,P10809,Q10713,P35232,P08174,O75340
1	124	2	GO:0031638	BP	zymogen activation	8	P10809,O75340
1	559	5	GO:1901615	BP	organic hydroxy compound metabolic process	4	Q9UNW1,P50416,O95573,P09038,P42765
1.5e-10	2290	43	GO:1901564	BP	organonitrogen compound metabolic process	4	O75223,P31930,P04181,Q15717,O15460,Q00325,Q9BXP5,O75822,P06732,Q02218,P50416,P06576,O43598,P52298,Q6PI48,P22626,P13674,O95573,Q12931,Q16718,P61289,Q9HCC0,P21266,P15586,Q09161,P09038,Q00610,O00622,P49458,Q6XQN6,P00367,P46013,P25705,Q4G0N4,O60841,P52789,P55265,P04843,P34897,P82979,Q9ULC4,P07203,Q9Y697
1	180	4	GO:0006022	BP	aminoglycan metabolic process	5	P15586,P09038,Q00610,P46013
1	172	4	GO:0030203	BP	glycosaminoglycan metabolic process	6	P15586,P09038,Q00610,P46013
1	130	4	GO:1903510	BP	mucopolysaccharide metabolic process	7	P15586,P09038,Q00610,P46013
1	38	3	GO:0030212	BP	hyaluronan metabolic process	8	P09038,Q00610,P46013
1	239	3	GO:0009308	BP	amine metabolic process	5	P06732,O95573,P61289
1	11	1	GO:0009820	BP	alkaloid metabolic process	5	Q6XQN6
3.27e-113	6143	194	GO:1901360	BP	organic cyclic compound metabolic process	4	P23511,Q9NQ29,Q9UIG0,P31930,Q9Y5J1,O95394,P51948,P49959,Q8IX12,P26368,P04181,Q13428,O43709,O15460,Q969G3,O75530,Q15054,Q96FV9,Q96MU7,Q9Y2W2,Q8IWX8,Q9NW64,Q9BXP5,Q92945,P35637,Q9P2N5,Q6P6C2,Q9Y5N6,Q5SRE5,Q99459,Q96RN5,O00541,P61218,Q92841,Q96EK6,Q13573,Q6PJT7,Q9UKV3,P27695,Q9HCK8,Q9H307,P78406,Q9NV56,O43148,O43719,Q8N1F7,P49711,P56270,P08621,Q02218,P49005,Q9Y657,Q99567,P17844,O95232,Q7KZ85,P06576,…
0.000486	1020	20	GO:0005975	BP	carbohydrate metabolic process	4	O95394,O75390,Q5SRE5,Q96EK6,P78406,Q8N1F7,Q02218,Q99567,P50416,P57740,Q16222,P35658,P15586,Q00610,Q10471,P49792,P52789,P04843,P17706,P08174
1	117	1	GO:0005976	BP	polysaccharide metabolic process	5	Q00610
1.84e-56	6390	143	GO:0009058	BP	biosynthetic process	3	P23511,O75223,Q9UIG0,O95394,P51948,P49959,Q8IX12,P26368,P04181,Q15717,Q13428,O43709,Q969G3,O75530,Q00325,Q15054,Q96FV9,P40939,Q9BXP5,Q92945,P35637,Q9Y5N6,Q5SRE5,Q99459,Q96RN5,P61218,Q92841,Q96EK6,Q13573,P27695,Q9HCK8,Q9H307,P78406,Q9NV56,O43148,O43719,Q8N1F7,P49711,P56270,O75822,P06732,P49005,Q9Y657,Q99567,P17844,Q7KZ85,P06576,O14519,P57740,P84103,P53999,O14776,P52298,P23246,Q16222,Q6PI48,O15446,…
3.39e-57	6305	143	GO:1901576	BP	organic substance biosynthetic process	4	P23511,O75223,Q9UIG0,O95394,P51948,P49959,Q8IX12,P26368,P04181,Q15717,Q13428,O43709,Q969G3,O75530,Q00325,Q15054,Q96FV9,P40939,Q9BXP5,Q92945,P35637,Q9Y5N6,Q5SRE5,Q99459,Q96RN5,P61218,Q92841,Q96EK6,Q13573,P27695,Q9HCK8,Q9H307,P78406,Q9NV56,O43148,O43719,Q8N1F7,P49711,P56270,O75822,P06732,P49005,Q9Y657,Q99567,P17844,Q7KZ85,P06576,O14519,P57740,P84103,P53999,O14776,P52298,P23246,Q16222,Q6PI48,O15446,…
1	231	3	GO:1901617	BP	organic hydroxy compound biosynthetic process	5	O95573,P09038,P42765
1.59e-48	4506	115	GO:1901362	BP	organic cyclic compound biosynthetic process	5	P23511,Q9UIG0,O95394,P51948,Q8IX12,P26368,P04181,Q13428,O43709,Q969G3,O75530,Q15054,Q96FV9,Q9BXP5,Q92945,P35637,Q5SRE5,Q99459,Q96RN5,P61218,Q92841,Q96EK6,Q13573,P27695,Q9HCK8,Q9H307,P78406,Q9NV56,O43148,O43719,Q8N1F7,P49711,P56270,P49005,Q9Y657,Q99567,P17844,Q7KZ85,P06576,P57740,P84103,P53999,O14776,P52298,P23246,Q16222,O15446,Q15651,Q9NRZ9,P42166,P22626,Q15014,Q32MZ4,P35269,P61244,P35658,P51532,…
4.6e-07	1439	29	GO:1901566	BP	organonitrogen compound biosynthetic process	5	O75223,P04181,Q15717,Q00325,Q9BXP5,O75822,P06732,P06576,P52298,Q6PI48,P22626,O95573,Q12931,P21266,Q09161,Q00610,O00622,P49458,Q6XQN6,P00367,P25705,Q4G0N4,O60841,P55265,P04843,P34897,P82979,Q9ULC4,Q9Y697
1	894	9	GO:1901137	BP	carbohydrate derivative biosynthetic process	5	O95394,Q96EK6,P06576,Q16222,Q00610,Q10471,P25705,P04843,P08174
0.0131	8	3	GO:0046349	BP	amino sugar biosynthetic process	6	O95394,Q96EK6,Q16222
4.9e-51	5283	126	GO:0009059	BP	macromolecule biosynthetic process	5	P23511,Q9UIG0,O95394,P51948,P49959,Q8IX12,P26368,Q15717,Q13428,O43709,Q969G3,O75530,Q00325,Q15054,Q96FV9,Q9BXP5,Q92945,P35637,Q9Y5N6,Q5SRE5,Q99459,Q96RN5,P61218,Q92841,Q96EK6,Q13573,P27695,Q9HCK8,Q9H307,P78406,Q9NV56,O43148,O43719,Q8N1F7,P49711,P56270,O75822,P49005,Q9Y657,Q99567,P17844,Q7KZ85,O14519,P57740,P84103,P53999,O14776,P52298,P23246,Q16222,Q6PI48,O15446,Q15651,Q9NRZ9,P42166,P22626,Q15014,…
7.18e-09	2256	40	GO:0009056	BP	catabolic process	3	P26368,P04181,Q13362,P55809,Q9Y2W2,P40939,Q92945,Q9UKV3,Q8N1F7,Q16698,P08621,Q02218,P50416,O43598,P52298,P07339,Q5T4S7,P30084,P61289,Q9HCC0,P21266,P15586,Q09161,P40818,P09038,Q9Y6I4,P00533,P00367,Q13112,P52789,Q01081,P61221,P30048,P35232,Q9Y3B2,P09543,Q13330,P07305,P36776,P07203
1.04e-05	1864	31	GO:1901575	BP	organic substance catabolic process	4	P04181,Q13362,P55809,P40939,Q92945,Q16698,Q02218,P50416,O43598,P52298,P07339,Q5T4S7,P30084,P61289,Q9HCC0,P15586,Q09161,P40818,P09038,Q9Y6I4,P00533,P00367,P52789,P61221,P35232,Q9Y3B2,P09543,Q13330,P07305,P36776,P07203
1	362	7	GO:1901565	BP	organonitrogen compound catabolic process	5	P04181,Q02218,Q9HCC0,P15586,P09038,P00367,P07203
1	486	9	GO:1901361	BP	organic cyclic compound catabolic process	5	Q92945,O43598,P52298,Q09161,P61221,Q9Y3B2,P09543,P07305,P07203
1	182	2	GO:1901136	BP	carbohydrate derivative catabolic process	5	P15586,P09038
0.0209	1199	19	GO:0009057	BP	macromolecule catabolic process	5	Q13362,Q92945,P52298,P07339,Q5T4S7,P61289,P15586,Q09161,P40818,P09038,Q9Y6I4,P00533,P61221,P35232,Q9Y3B2,Q13330,P07305,P36776,P07203
1	69	2	GO:0006026	BP	aminoglycan catabolic process	6	P15586,P09038
1	63	2	GO:0006027	BP	glycosaminoglycan catabolic process	7	P15586,P09038
1	827	11	GO:0030163	BP	protein catabolic process	6	Q13362,P07339,Q5T4S7,P61289,P40818,Q9Y6I4,P00533,P35232,Q13330,P36776,P07203
1	146	2	GO:0016052	BP	carbohydrate catabolic process	5	Q02218,P52789
1	1403	17	GO:0000003	BP	reproduction	2	O95394,P49959,Q14126,Q6P6C2,Q9Y657,P51532,Q9C0J8,O00622,P00533,P46013,P02545,Q15061,Q86U86,P30048,P08047,P08174,Q9BW19
1	347	7	GO:0048511	BP	rhythmic process	2	P23511,P17844,P50416,P23246,Q00839,Q13330,P08047
1	212	5	GO:0007623	BP	circadian rhythm	3	P17844,P50416,P23246,Q00839,Q13330
1	1004	13	GO:0040007	BP	growth	2	Q13642,Q9NV56,P17844,O43598,Q15014,P51532,Q09161,P09038,O00622,P35232,Q6PD62,Q9ULC4,P07203
7.85e-67	13769	212	GO:0044699	BP	single-organism process	2	P23511,P53701,O75223,Q9NQ29,Q9UIG0,P31930,Q9NQW6,O95394,P51948,P49959,Q13642,Q14126,Q8IX12,O75390,P26368,P04181,Q9BV38,Q15717,Q13428,O15460,P31040,Q969G3,O75530,Q00325,Q15054,Q13362,Q96FV9,Q9NTI5,P55809,Q9Y2W2,P40939,Q8IWX8,Q9NW64,Q9BXP5,Q9ULW0,P30086,Q9UKY7,Q6P6C2,Q9Y5N6,O00161,Q5SRE5,Q99459,Q96RN5,O00541,P61218,Q92841,Q96EK6,Q13573,Q9UKV3,P27695,Q9HCK8,P78406,Q9NV56,Q14155,O00505,Q8N1F7,P49711,…
5.05e-09	2026	38	GO:0016265	BP	death	3	O75223,P51948,P49959,Q14126,Q8IX12,Q13362,Q96FV9,Q9ULW0,Q13573,Q9UKV3,Q9HCK8,Q14155,P17844,P23246,O75940,Q9NRZ9,P61244,Q12931,P61289,Q9NWH9,P09038,O00622,P10809,O75915,P00533,Q14643,P52789,P55265,P02545,P30048,Q9BZZ5,P35232,P42765,Q86YP4,P17706,P07305,P07203,O75340
6.6e-10	1990	39	GO:0008283	BP	cell proliferation	3	P23511,P51948,P49959,Q8IX12,Q13362,Q9NTI5,Q8IWX8,Q9BXP5,Q9ULW0,Q9UKY7,O00541,P46087,O43598,Q9NRZ9,O75691,O60832,Q9UBD5,P17096,P40818,P09038,O00622,Q99661,P10809,P00533,P46013,P25705,Q6YHK3,Q86U86,P30048,P35232,Q8NEM2,P17706,P34897,P08174,O43663,P05114,Q9ULC4,P07203,O75340
1	153	2	GO:0033002	BP	muscle cell proliferation	4	P51948,P09038
1	52	1	GO:0014855	BP	striated muscle cell proliferation	5	P09038
1	14	1	GO:0014856	BP	skeletal muscle cell proliferation	6	P09038
1	11	1	GO:0014841	BP	skeletal muscle satellite cell proliferation	7	P09038
1	105	2	GO:0048659	BP	smooth muscle cell proliferation	5	P51948,P09038
0.84	354	8	GO:0050673	BP	epithelial cell proliferation	4	P09038,P00533,P46013,P25705,Q6YHK3,P05114,P07203,O75340
1	38	1	GO:0043616	BP	keratinocyte proliferation	5	Q6YHK3
1	113	3	GO:0001935	BP	endothelial cell proliferation	5	P09038,P25705,O75340
1	3	1	GO:1990705	BP	cholangiocyte proliferation	5	P46013
1	90	1	GO:0048144	BP	fibroblast proliferation	4	P00533
1	279	3	GO:0070661	BP	leukocyte proliferation	4	Q9NRZ9,P10809,P08174
1	267	3	GO:0032943	BP	mononuclear cell proliferation	5	Q9NRZ9,P10809,P08174
1	16	1	GO:0051450	BP	myoblast proliferation	4	P07203
1	151	3	GO:0061351	BP	neural precursor cell proliferation	4	Q9UBD5,P09038,Q8NEM2
1	153	1	GO:0072089	BP	stem cell proliferation	4	P23511
1	26	1	GO:0033687	BP	osteoblast proliferation	4	O00622
2.87e-39	5684	116	GO:0044710	BP	single-organism metabolic process	3	P23511,P53701,O75223,Q9UIG0,P31930,O95394,P51948,P49959,O75390,P26368,P04181,O15460,P31040,O75530,Q15054,Q96FV9,P55809,Q9Y2W2,P40939,Q9BXP5,P30086,Q6P6C2,Q5SRE5,Q99459,P61218,Q96EK6,Q13573,Q9UKV3,P27695,P78406,Q9NV56,Q8N1F7,P49711,Q16698,P06732,Q02218,P49005,Q9UNW1,Q99567,Q7KZ85,P50416,P06576,P57740,O43598,P23246,Q16222,Q6PI48,P07339,P54278,P22626,P13674,Q9Y305,Q9P032,Q15014,O95573,P16083,Q12931,…
1	409	8	GO:1901657	BP	glycosyl compound metabolic process	4	P31930,Q02218,P06576,O43598,Q16718,Q9HCC0,P25705,P52789
1	106	1	GO:1901568	BP	fatty acid derivative metabolic process	4	P07203
6.42e-05	1178	23	GO:0044712	BP	single-organism catabolic process	4	P26368,P04181,P55809,Q9Y2W2,P40939,Q9UKV3,Q8N1F7,Q16698,Q02218,P50416,O43598,P07339,P30084,Q9HCC0,P15586,P09038,P00367,Q13112,P52789,Q01081,P30048,P09543,P07203
1	16	1	GO:0030214	BP	hyaluronan catabolic process	5	P09038
1	829	12	GO:0044723	BP	single-organism carbohydrate metabolic process	4	O95394,Q96EK6,Q02218,P50416,Q16222,Q00610,Q10471,P49792,P52789,P04843,P17706,P08174
1	138	2	GO:0044724	BP	single-organism carbohydrate catabolic process	5	Q02218,P52789
1	429	6	GO:0070085	BP	glycosylation	5	O95394,Q96EK6,Q16222,Q10471,P04843,P08174
1	424	6	GO:0043413	BP	macromolecule glycosylation	6	O95394,Q96EK6,Q16222,Q10471,P04843,P08174
8.31e-07	1776	32	GO:0044711	BP	single-organism biosynthetic process	4	O75223,O95394,P49959,P04181,Q15054,P40939,Q96EK6,P27695,P49005,P06576,Q16222,Q6PI48,Q9Y305,O95573,Q9NVN8,O60832,P21266,P09651,P09038,Q00610,O00622,Q6XQN6,P00367,P25705,Q4G0N4,Q00839,P49792,Q14558,Q15004,P42765,P17706,P34897
1	130	2	GO:1901659	BP	glycosyl compound biosynthetic process	5	P06576,P25705
1	115	1	GO:0006023	BP	aminoglycan biosynthetic process	5	Q00610
1	114	1	GO:0006024	BP	glycosaminoglycan biosynthetic process	6	Q00610
1	14	1	GO:0030213	BP	hyaluronan biosynthetic process	7	Q00610
1	205	3	GO:0016051	BP	carbohydrate biosynthetic process	5	Q00610,P49792,P17706
1	78	1	GO:0000271	BP	polysaccharide biosynthetic process	6	Q00610
1	32	1	GO:0045730	BP	respiratory burst	4	P08174
3.27e-08	1111	27	GO:0055114	BP	oxidation-reduction process	4	P53701,P31930,O75390,O15460,P31040,P40939,Q6P6C2,P27695,Q16698,Q02218,P50416,P06576,P13674,Q9P032,P16083,Q12931,P30084,Q16718,P10606,Q96G46,P00367,Q14643,P25705,P52789,P30048,P31150,P07203
4.09e-13	2701	51	GO:0044281	BP	small molecule metabolic process	4	P23511,O75223,P31930,O75390,P04181,O15460,P31040,P55809,P40939,Q5SRE5,P78406,Q8N1F7,Q16698,P06732,Q02218,Q9UNW1,Q99567,P50416,P06576,P57740,O43598,Q6PI48,P13674,Q9Y305,Q9P032,O95573,P35658,P30084,Q16718,P61289,Q9HCC0,P21266,P15586,P10606,P09038,Q6XQN6,Q99541,P00367,Q14643,P25705,Q4G0N4,P49792,P52789,Q14558,P42765,P09543,P17706,P34897,P08047,P07203,Q9Y697
0.0264	356	10	GO:0044282	BP	small molecule catabolic process	5	P04181,P55809,P40939,Q16698,Q02218,P50416,P30084,Q9HCC0,P00367,P52789
1	553	8	GO:0044283	BP	small molecule biosynthetic process	5	P04181,O95573,P09038,P00367,P49792,P42765,P17706,P34897
1	175	4	GO:0006766	BP	vitamin metabolic process	5	Q9HCC0,Q6XQN6,P34897,Q9Y697
1	97	4	GO:0006767	BP	water-soluble vitamin metabolic process	6	Q9HCC0,Q6XQN6,P34897,Q9Y697
1	393	4	GO:0006066	BP	alcohol metabolic process	5	Q9UNW1,O95573,P09038,P42765
1	107	2	GO:0019751	BP	polyol metabolic process	6	Q9UNW1,P09038
1	128	1	GO:1902652	BP	secondary alcohol metabolic process	6	P42765
1	153	3	GO:0046165	BP	alcohol biosynthetic process	6	O95573,P09038,P42765
1	39	1	GO:0046173	BP	polyol biosynthetic process	7	P09038
1	50	1	GO:1902653	BP	secondary alcohol biosynthetic process	7	P42765
1	317	4	GO:0005996	BP	monosaccharide metabolic process	5	P50416,P49792,P52789,P17706
1	95	2	GO:0046364	BP	monosaccharide biosynthetic process	6	P49792,P17706
1	61	1	GO:0046365	BP	monosaccharide catabolic process	6	P52789
1	270	4	GO:0019318	BP	hexose metabolic process	6	P50416,P49792,P52789,P17706
1	51	1	GO:0019320	BP	hexose catabolic process	7	P52789
1	232	4	GO:0006006	BP	glucose metabolic process	7	P50416,P49792,P52789,P17706
1	34	1	GO:0006007	BP	glucose catabolic process	8	P52789
1	88	2	GO:0019319	BP	hexose biosynthetic process	7	P49792,P17706
1	85	2	GO:0006094	BP	gluconeogenesis	8	P49792,P17706
1	69	3	GO:0070988	BP	demethylation	4	Q6P6C2,P27695,P62805
1	15	1	GO:0070989	BP	oxidative demethylation	5	Q6P6C2
1	1363	17	GO:0006629	BP	lipid metabolic process	4	O95394,P55809,P40939,Q96EK6,Q16698,P50416,P06576,Q16222,Q9Y305,O95573,P30084,P09038,O00622,Q99541,P25705,P42765,P07203
1	297	1	GO:0008202	BP	steroid metabolic process	5	P42765
1	139	1	GO:0016125	BP	sterol metabolic process	6	P42765
1	125	1	GO:0008203	BP	cholesterol metabolic process	7	P42765
1	659	6	GO:0008610	BP	lipid biosynthetic process	5	P40939,Q9Y305,O95573,P09038,O00622,P42765
1	156	1	GO:0006694	BP	steroid biosynthetic process	6	P42765
1	55	1	GO:0016126	BP	sterol biosynthetic process	7	P42765
1	50	1	GO:0006695	BP	cholesterol biosynthetic process	8	P42765
1	299	4	GO:0016042	BP	lipid catabolic process	5	P40939,Q16698,P50416,P30084
0.83	1853	21	GO:0040011	BP	locomotion	2	Q9NQW6,P49959,Q8IX12,P30086,P27695,Q14155,O00505,Q02218,P06576,P61289,P09038,O00622,P00533,P02545,P25815,P17706,Q9P258,P08174,Q9Y5S2,P07203,O75340
9.75e-63	11489	192	GO:0065007	BP	biological regulation	2	P23511,O75223,Q9NQ29,Q9UIG0,Q9NQW6,P51948,P49959,Q13642,Q14126,Q8IX12,P26368,Q15717,O43709,Q969G3,O75530,Q15054,Q13362,Q96FV9,Q9NTI5,P55809,Q9Y2W2,Q8IWX8,Q9NW64,Q9BXP5,Q92945,Q9ULW0,P30086,P35637,Q6P6C2,O00161,Q5SRE5,Q99459,Q96RN5,O00541,P61218,Q92841,Q13573,Q6PJT7,Q9UKV3,P27695,Q9HCK8,Q9H307,P78406,Q9NV56,O43719,Q14155,O00505,Q8N1F7,P49711,P56270,O75822,P08621,P49005,Q9Y657,Q5JRX3,Q99567,P17844,…
1.59e-08	2862	45	GO:0065009	BP	regulation of molecular function	3	Q9UIG0,P51948,P49959,Q13642,Q13362,Q9Y2W2,Q9ULW0,P30086,Q14155,P49711,P08621,Q5JRX3,Q15651,P35269,P51532,O43852,Q9NVN8,O60832,P61289,P51946,P09038,O00622,O43768,P10809,O75915,P00533,Q14643,Q00839,P49792,Q6YHK3,P55265,Q14558,Q15061,P30533,P61221,P30048,O95400,P17706,Q9P258,P18754,P08174,P31150,Q8WXX5,P07203,O75340
0.00363	1830	26	GO:0044093	BP	positive regulation of molecular function	4	Q9UIG0,P49959,Q9ULW0,P30086,Q14155,Q5JRX3,Q15651,P35269,P51532,Q9NVN8,O60832,P61289,P51946,P09038,O00622,P10809,O75915,P00533,Q14643,Q00839,P30048,Q9P258,P18754,P31150,Q8WXX5,O75340
1	282	3	GO:0051098	BP	regulation of binding	4	Q14155,Q9NVN8,P30533
1	168	3	GO:0043393	BP	regulation of protein binding	5	Q14155,Q9NVN8,P30533
1	21	1	GO:0043496	BP	regulation of protein homodimerization activity	6	Q9NVN8
1	5	1	GO:1904424	BP	regulation of GTP binding	5	Q14155
1	126	2	GO:0051099	BP	positive regulation of binding	5	Q14155,Q9NVN8
1	75	2	GO:0032092	BP	positive regulation of protein binding	6	Q14155,Q9NVN8
1	9	1	GO:0090073	BP	positive regulation of protein homodimerization activity	7	Q9NVN8
1	1	1	GO:0040030	BP	regulation of molecular function, epigenetic	4	P49711
0.116	1130	17	GO:0044092	BP	negative regulation of molecular function	4	P30086,O43852,Q9NVN8,P61289,O43768,P49792,Q6YHK3,P55265,Q14558,P30533,P61221,P30048,O95400,P17706,Q9P258,P08174,P07203
1	128	2	GO:0051100	BP	negative regulation of binding	5	Q9NVN8,P30533
1	74	2	GO:0032091	BP	negative regulation of protein binding	6	Q9NVN8,P30533
1.64e-14	3631	62	GO:0065008	BP	regulation of biological quality	3	P49959,Q13642,Q14126,Q15717,Q15054,P55809,Q8IWX8,Q92945,O00161,Q5SRE5,Q13573,Q6PJT7,Q9UKV3,P27695,P78406,Q14155,O00505,Q8N1F7,P49005,Q99567,P50416,P06576,P57740,Q15651,P35658,P51532,O43852,Q9NVN8,O60832,P36543,P61289,P09651,P09038,Q9Y6I4,Q99661,O43768,P10809,O75915,Q99541,P00367,Q14643,Q00839,P49792,P52789,P55265,P53367,P30048,P35232,P42765,Q9Y3B2,P09543,Q9H2U1,P17706,Q13151,P52292,P08047,O00629,…
1	484	2	GO:0090066	BP	regulation of anatomical structure size	4	P53367,P07203
1	152	1	GO:0035150	BP	regulation of tube size	5	P07203
1	507	8	GO:0010817	BP	regulation of hormone levels	4	P55809,O00161,Q14155,P50416,Q15651,O43768,P00367,Q14643
1	181	1	GO:0001505	BP	regulation of neurotransmitter levels	4	O00161
1	358	4	GO:0042391	BP	regulation of membrane potential	4	Q13642,Q14126,O75915,P30048
1	56	2	GO:0051881	BP	regulation of mitochondrial membrane potential	5	O75915,P30048
1	123	1	GO:0001508	BP	action potential	5	Q14126
1	47	1	GO:0086001	BP	cardiac muscle cell action potential	6	Q14126
1	93	1	GO:0051899	BP	membrane depolarization	5	Q13642
1	6	1	GO:0045837	BP	negative regulation of membrane potential	5	O75915
1	4	1	GO:0010917	BP	negative regulation of mitochondrial membrane potential	6	O75915
1	732	5	GO:0050878	BP	regulation of body fluid levels	4	O43852,Q99661,Q14643,P52789,Q9BW19
1	578	4	GO:0007599	BP	hemostasis	5	O43852,Q99661,Q14643,Q9BW19
2.18e-05	1605	28	GO:0042592	BP	homeostatic process	4	P49959,Q13642,Q15054,P55809,Q8IWX8,Q9UKV3,P27695,P49005,P06576,Q15651,P51532,Q9NVN8,O60832,P36543,P09651,P09038,Q14643,Q00839,P49792,P52789,P55265,Q9H2U1,P17706,P08047,P08174,P62805,Q86U70,P07203
0.00618	373	11	GO:0060249	BP	anatomical structure homeostasis	5	P49959,Q15054,P27695,P49005,Q9NVN8,O60832,P09651,Q00839,Q9H2U1,P62805,Q86U70
1	1022	13	GO:0048878	BP	chemical homeostasis	5	Q13642,P55809,Q8IWX8,P06576,Q15651,P51532,P36543,P09038,Q14643,P49792,P52789,P17706,P08174
1	230	6	GO:0033500	BP	carbohydrate homeostasis	6	P55809,Q15651,P51532,P49792,P52789,P17706
1	230	6	GO:0042593	BP	glucose homeostasis	7	P55809,Q15651,P51532,P49792,P52789,P17706
1	679	7	GO:0050801	BP	ion homeostasis	6	Q13642,Q8IWX8,P06576,P36543,P09038,Q14643,P08174
1	604	6	GO:0055080	BP	cation homeostasis	7	Q8IWX8,P06576,P36543,P09038,Q14643,P08174
1	618	6	GO:0098771	BP	inorganic ion homeostasis	7	Q8IWX8,P06576,P36543,P09038,Q14643,P08174
1	124	1	GO:0055067	BP	monovalent inorganic cation homeostasis	8	P06576
1	71	1	GO:0006885	BP	regulation of pH	9	P06576
1	402	4	GO:0072507	BP	divalent inorganic cation homeostasis	8	Q8IWX8,P09038,Q14643,P08174
1	555	5	GO:0055065	BP	metal ion homeostasis	8	Q8IWX8,P36543,P09038,Q14643,P08174
1	138	1	GO:0055076	BP	transition metal ion homeostasis	9	P36543
1	98	1	GO:0055072	BP	iron ion homeostasis	10	P36543
1	375	4	GO:0055074	BP	calcium ion homeostasis	9	Q8IWX8,P09038,Q14643,P08174
1	238	5	GO:0048872	BP	homeostasis of number of cells	5	Q9UKV3,P55265,P17706,P08047,Q86U70
1	5	1	GO:0061484	BP	hematopoietic stem cell homeostasis	6	P55265
1	70	3	GO:0090559	BP	regulation of membrane permeability	4	P52789,P42765,P09543
1	213	4	GO:0031647	BP	regulation of protein stability	4	Q9NVN8,Q9Y6I4,P10809,P35232
1	128	2	GO:0050821	BP	protein stabilization	5	P10809,P35232
2.04e-17	5739	85	GO:0051179	BP	localization	2	P31930,Q9NQW6,Q13642,Q14126,Q8IX12,P26368,Q13428,Q00325,Q96FV9,P55809,Q9Y2W2,Q8IWX8,Q9NW64,Q92945,Q6P6C2,O00161,Q5SRE5,O00541,P27695,P78406,Q14155,O00505,Q8N1F7,Q02218,Q99567,Q7KZ85,P50416,P06576,P57740,P84103,P52298,A0FGR8,Q15651,P22626,O95573,P35658,O60220,O43852,Q9NVN8,O60832,P36543,P09651,P10606,Q09161,P09038,Q00610,O00622,Q99661,O43768,P49458,O75915,P00533,Q99541,P00367,Q14643,P25705,P49792,…
1.8e-16	2805	57	GO:0033036	BP	macromolecule localization	3	P26368,Q96FV9,P55809,Q9Y2W2,Q8IWX8,Q9NW64,Q92945,Q6P6C2,O00161,Q5SRE5,O00541,P78406,O00505,Q8N1F7,Q99567,Q7KZ85,P50416,P57740,P84103,P52298,A0FGR8,Q15651,P22626,O95573,P35658,O60220,Q9NVN8,O60832,P36543,P09651,Q09161,Q00610,O43768,P49458,P00533,Q99541,P00367,Q14643,P49792,P52789,Q01081,P55265,P02545,Q01130,P04843,P53367,Q9H814,Q10713,Q13636,O43660,P17706,Q9P258,P52292,O00629,P31150,P82979,O75340
5.37e-09	2445	42	GO:0008104	BP	protein localization	4	P26368,P55809,Q9Y2W2,Q8IWX8,Q9NW64,O00161,Q5SRE5,O00541,O00505,Q8N1F7,Q99567,P50416,P57740,Q15651,O95573,P35658,O60220,Q9NVN8,O60832,P36543,Q00610,O43768,P49458,P00533,P00367,Q14643,P49792,P52789,Q01081,P55265,P02545,P04843,P53367,Q9H814,Q10713,Q13636,O43660,Q9P258,P52292,O00629,P31150,O75340
1	108	1	GO:0031503	BP	protein complex localization	5	Q9P258
4.9e-20	195	22	GO:0006403	BP	RNA localization	4	P26368,Q96FV9,Q92945,Q6P6C2,Q5SRE5,P78406,Q8N1F7,Q99567,Q7KZ85,P57740,P84103,P52298,P22626,P35658,O60832,P09651,Q09161,P49792,Q01081,Q01130,Q9H814,P82979
1	16	1	GO:0090670	BP	RNA localization to Cajal body	5	O60832
1	16	1	GO:0090672	BP	telomerase RNA localization	5	O60832
1	16	1	GO:0090671	BP	telomerase RNA localization to Cajal body	6	O60832
1	343	5	GO:0010876	BP	lipid localization	4	P50416,A0FGR8,O95573,Q99541,P17706
1	1320	15	GO:0051674	BP	localization of cell	3	Q9NQW6,Q8IX12,P27695,Q14155,Q02218,P06576,P09038,O00622,P00533,P02545,P25815,Q9P258,Q9Y5S2,P07203,O75340
8.13e-15	4711	72	GO:0051234	BP	establishment of localization	3	P31930,Q13642,P26368,Q13428,Q00325,Q96FV9,P55809,Q9Y2W2,Q8IWX8,Q9NW64,Q92945,Q6P6C2,O00161,Q5SRE5,P78406,Q14155,O00505,Q8N1F7,Q99567,Q7KZ85,P50416,P06576,P57740,P84103,P52298,A0FGR8,Q15651,P22626,O95573,P35658,O60220,O43852,O60832,P36543,P09651,P10606,Q09161,P09038,Q00610,Q99661,O43768,P49458,O75915,P00533,Q99541,P00367,Q14643,P25705,P49792,P52789,Q01081,P55265,P02545,Q01130,Q15061,P04843,P30533,…
2.84e-20	163	21	GO:0051236	BP	establishment of RNA localization	4	P26368,Q96FV9,Q92945,Q6P6C2,Q5SRE5,P78406,Q8N1F7,Q99567,Q7KZ85,P57740,P84103,P52298,P22626,P35658,P09651,Q09161,P49792,Q01081,Q01130,Q9H814,P82979
3.41e-13	4571	68	GO:0006810	BP	transport	4	P31930,Q13642,P26368,Q13428,Q00325,Q96FV9,P55809,Q9Y2W2,Q8IWX8,Q9NW64,Q92945,Q6P6C2,O00161,Q5SRE5,P78406,Q14155,O00505,Q8N1F7,Q99567,Q7KZ85,P50416,P06576,P57740,P84103,P52298,A0FGR8,Q15651,P22626,O95573,P35658,O60220,O43852,P36543,P09651,P10606,Q09161,P09038,Q00610,O43768,P49458,O75915,P00533,Q99541,P00367,Q14643,P25705,P49792,P52789,Q01081,P55265,P02545,Q01130,Q15061,P04843,P30533,P53367,P61221,…
6.88e-15	2637	53	GO:0071702	BP	organic substance transport	5	P26368,Q96FV9,P55809,Q9Y2W2,Q8IWX8,Q9NW64,Q92945,Q6P6C2,O00161,Q5SRE5,P78406,Q14155,O00505,Q8N1F7,Q99567,Q7KZ85,P50416,P57740,P84103,P52298,A0FGR8,Q15651,P22626,O95573,P35658,O60220,P36543,P09651,Q09161,Q00610,O43768,P49458,O75915,P00533,Q99541,P00367,Q14643,P49792,P52789,Q01081,P55265,P02545,Q01130,P04843,P53367,Q9H814,Q10713,Q13636,P52292,O00629,P31150,P82979,O75340
3.55e-14	807	30	GO:0071705	BP	nitrogen compound transport	5	P26368,Q96FV9,P55809,Q92945,Q6P6C2,O00161,Q5SRE5,P78406,Q14155,Q8N1F7,Q99567,Q7KZ85,P50416,P57740,P84103,P52298,Q15651,P22626,P35658,P09651,Q09161,O43768,O75915,P00367,Q14643,P49792,Q01081,Q01130,Q9H814,P82979
1.2e-18	194	21	GO:0015931	BP	nucleobase-containing compound transport	6	P26368,Q96FV9,Q92945,Q6P6C2,Q5SRE5,P78406,Q8N1F7,Q99567,Q7KZ85,P57740,P84103,P52298,P22626,P35658,P09651,Q09161,P49792,Q01081,Q01130,Q9H814,P82979
2.17e-20	161	21	GO:0050657	BP	nucleic acid transport	7	P26368,Q96FV9,Q92945,Q6P6C2,Q5SRE5,P78406,Q8N1F7,Q99567,Q7KZ85,P57740,P84103,P52298,P22626,P35658,P09651,Q09161,P49792,Q01081,Q01130,Q9H814,P82979
2.17e-20	161	21	GO:0050658	BP	RNA transport	8	P26368,Q96FV9,Q92945,Q6P6C2,Q5SRE5,P78406,Q8N1F7,Q99567,Q7KZ85,P57740,P84103,P52298,P22626,P35658,P09651,Q09161,P49792,Q01081,Q01130,Q9H814,P82979
1	1	1	GO:1990428	BP	miRNA transport	9	P22626
1.8e-20	135	20	GO:0051028	BP	mRNA transport	9	P26368,Q96FV9,Q92945,Q6P6C2,Q5SRE5,P78406,Q8N1F7,Q99567,Q7KZ85,P57740,P84103,P52298,P22626,P35658,P09651,Q09161,P49792,Q01081,Q01130,P82979
1	18	1	GO:0045117	BP	azole transport	6	O00161
1	1400	10	GO:0016192	BP	vesicle-mediated transport	5	O00161,A0FGR8,O95573,O43852,Q00610,P00533,Q14643,P30533,Q13636,P08174
1	639	6	GO:0006897	BP	endocytosis	6	A0FGR8,Q00610,P00533,Q14643,P30533,Q13636
1	301	4	GO:0006898	BP	receptor-mediated endocytosis	7	Q00610,P00533,P30533,Q13636
9.25e-10	2012	39	GO:0045184	BP	establishment of protein localization	4	P26368,P55809,Q9Y2W2,Q8IWX8,Q9NW64,O00161,Q5SRE5,O00505,Q8N1F7,Q99567,P50416,P57740,Q15651,O95573,P35658,O60220,O60832,P36543,Q00610,O43768,P49458,P00533,P00367,Q14643,P49792,P52789,Q01081,P55265,P02545,P04843,P53367,Q9H814,Q10713,Q13636,Q9P258,P52292,O00629,P31150,O75340
8.53e-09	1862	36	GO:0015031	BP	protein transport	5	P26368,P55809,Q9Y2W2,Q8IWX8,Q9NW64,O00161,Q5SRE5,O00505,Q8N1F7,Q99567,P50416,P57740,Q15651,O95573,P35658,O60220,P36543,Q00610,O43768,P49458,P00533,P00367,Q14643,P49792,Q01081,P55265,P02545,P04843,P53367,Q9H814,Q10713,Q13636,P52292,O00629,P31150,O75340
5.61e-19	3044	63	GO:0051641	BP	cellular localization	3	P26368,Q96FV9,P55809,Q9Y2W2,Q8IWX8,Q9NW64,Q6P6C2,O00161,Q5SRE5,O00541,P78406,Q14155,O00505,Q8N1F7,Q99567,Q7KZ85,P50416,P06576,P57740,P84103,P52298,Q15651,P22626,O95573,P35658,O60220,O43852,Q9NVN8,O60832,P09651,Q09161,P09038,Q00610,Q99661,O43768,P49458,P00533,P00367,Q14643,P25705,P49792,P52789,Q01081,P55265,P02545,Q01130,Q15061,P04843,P53367,Q9H814,Q10713,P42765,Q13636,O43660,P09543,Q9P258,P52292,…
9.35e-17	97	16	GO:0071166	BP	ribonucleoprotein complex localization	4	P26368,Q96FV9,Q6P6C2,P78406,Q8N1F7,Q99567,Q7KZ85,P57740,P84103,P52298,P22626,P35658,Q09161,Q01081,Q01130,P82979
5.6e-09	1549	33	GO:0070727	BP	cellular macromolecule localization	4	P26368,Q9Y2W2,Q8IWX8,Q9NW64,Q5SRE5,O00541,O00505,Q8N1F7,Q99567,P57740,O95573,P35658,O60220,Q9NVN8,O60832,Q00610,P49458,P00533,P49792,P52789,Q01081,P55265,P02545,P04843,P53367,Q10713,Q13636,O43660,Q9P258,P52292,O00629,P31150,O75340
4.63e-09	1538	33	GO:0034613	BP	cellular protein localization	5	P26368,Q9Y2W2,Q8IWX8,Q9NW64,Q5SRE5,O00541,O00505,Q8N1F7,Q99567,P57740,O95573,P35658,O60220,Q9NVN8,O60832,Q00610,P49458,P00533,P49792,P52789,Q01081,P55265,P02545,P04843,P53367,Q10713,Q13636,O43660,Q9P258,P52292,O00629,P31150,O75340
1	213	3	GO:1990778	BP	protein localization to cell periphery	6	O95573,Q00610,Q13636
1.7e-10	884	27	GO:0033365	BP	protein localization to organelle	6	P26368,Q9Y2W2,Q8IWX8,Q9NW64,Q5SRE5,O00541,O00505,Q8N1F7,Q99567,P57740,P35658,O60220,Q9NVN8,O60832,P49458,P00533,P49792,P52789,Q01081,P55265,P02545,P04843,Q10713,O43660,Q9P258,P52292,O00629
0.897	195	6	GO:0070585	BP	protein localization to mitochondrion	7	P26368,Q9Y2W2,O60220,P52789,Q01081,Q10713
7.83e-07	354	15	GO:0034504	BP	protein localization to nucleus	7	Q8IWX8,Q9NW64,Q5SRE5,O00505,Q8N1F7,Q99567,P57740,P35658,P00533,P49792,P55265,P02545,O43660,P52292,O00629
1	58	3	GO:0034502	BP	protein localization to chromosome	7	Q9NVN8,O60832,Q9P258
1	25	2	GO:0070198	BP	protein localization to chromosome, telomeric region	8	Q9NVN8,O60832
1	13	1	GO:0071459	BP	protein localization to chromosome, centromeric region	8	Q9P258
1	11	1	GO:0034501	BP	protein localization to kinetochore	9	Q9P258
1	137	2	GO:0070972	BP	protein localization to endoplasmic reticulum	7	P49458,P04843
1.08e-09	667	23	GO:0072594	BP	establishment of protein localization to organelle	7	P26368,Q9Y2W2,Q8IWX8,Q9NW64,Q5SRE5,O00505,Q8N1F7,Q99567,P57740,P35658,O60220,O60832,P49458,P00533,P49792,P52789,Q01081,P55265,P02545,P04843,Q10713,P52292,O00629
1	23	1	GO:0070199	BP	establishment of protein localization to chromosome	8	O60832
1	15	1	GO:0070200	BP	establishment of protein localization to telomere	9	O60832
0.782	190	6	GO:0072655	BP	establishment of protein localization to mitochondrion	8	P26368,Q9Y2W2,O60220,P52789,Q01081,Q10713
1	118	2	GO:0072599	BP	establishment of protein localization to endoplasmic reticulum	8	P49458,P04843
1	26	1	GO:0034629	BP	cellular protein complex localization	6	Q9P258
1	2	1	GO:0072356	BP	chromosome passenger complex localization to kinetochore	7	Q9P258
1	466	5	GO:0051640	BP	organelle localization	4	O00161,Q99567,Q99661,Q15061,Q9BW19
1	61	2	GO:0050000	BP	chromosome localization	5	Q99661,Q9BW19
1	8	1	GO:0033750	BP	ribosome localization	5	Q99567
1	25	1	GO:0051647	BP	nucleus localization	5	Q15061
1	49	1	GO:0032418	BP	lysosome localization	5	O00161
1	240	2	GO:0051648	BP	vesicle localization	5	O00161,Q15061
1	114	1	GO:0097479	BP	synaptic vesicle localization	6	O00161
1	355	5	GO:0051656	BP	establishment of organelle localization	5	O00161,Q99567,Q99661,Q15061,Q9BW19
2.01e-18	2640	58	GO:0051649	BP	establishment of localization in cell	4	P26368,Q96FV9,P55809,Q9Y2W2,Q8IWX8,Q9NW64,Q6P6C2,O00161,Q5SRE5,P78406,Q14155,O00505,Q8N1F7,Q99567,Q7KZ85,P50416,P06576,P57740,P84103,P52298,Q15651,P22626,O95573,P35658,O60220,O43852,P09651,Q09161,P09038,Q00610,Q99661,O43768,P49458,P00533,P00367,Q14643,P25705,P49792,P52789,Q01081,P55265,P02545,Q01130,Q15061,P04843,P53367,Q9H814,Q10713,P42765,Q13636,P09543,P52292,O00629,P08174,P31150,P82979,Q9BW19,…
1	89	1	GO:0099504	BP	synaptic vesicle cycle	5	O00161
1	8	1	GO:0033753	BP	establishment of ribosome localization	5	Q99567
1.1e-18	1905	50	GO:0046907	BP	intracellular transport	5	P26368,Q96FV9,Q9Y2W2,Q8IWX8,Q9NW64,Q6P6C2,O00161,Q5SRE5,P78406,O00505,Q8N1F7,Q99567,Q7KZ85,P50416,P06576,P57740,P84103,P52298,P22626,O95573,P35658,O60220,P09651,Q09161,P09038,Q00610,P49458,P00533,Q14643,P25705,P49792,P52789,Q01081,P55265,P02545,Q01130,Q15061,P04843,P53367,Q9H814,Q10713,P42765,Q13636,P09543,P52292,O00629,P08174,P31150,P82979,O75340
4.16e-19	443	28	GO:0051169	BP	nuclear transport	6	P26368,Q96FV9,Q8IWX8,Q9NW64,Q6P6C2,Q5SRE5,P78406,O00505,Q8N1F7,Q99567,Q7KZ85,P57740,P84103,P52298,P22626,P35658,P09651,Q09161,P00533,P49792,Q01081,P55265,P02545,Q01130,Q9H814,P52292,O00629,P82979
2.03e-16	1257	39	GO:0016482	BP	cytoplasmic transport	6	P26368,Q96FV9,Q9Y2W2,Q8IWX8,Q9NW64,Q6P6C2,Q5SRE5,P78406,O00505,Q8N1F7,Q99567,Q7KZ85,P57740,P84103,P52298,P22626,O95573,P35658,O60220,P09651,Q09161,P09038,Q00610,P49458,P00533,Q14643,P49792,Q01081,P55265,P02545,Q01130,P04843,Q9H814,Q10713,Q13636,P52292,O00629,P08174,P82979
3.06e-19	438	28	GO:0006913	BP	nucleocytoplasmic transport	7	P26368,Q96FV9,Q8IWX8,Q9NW64,Q6P6C2,Q5SRE5,P78406,O00505,Q8N1F7,Q99567,Q7KZ85,P57740,P84103,P52298,P22626,P35658,P09651,Q09161,P00533,P49792,Q01081,P55265,P02545,Q01130,Q9H814,P52292,O00629,P82979
3.12e-08	281	15	GO:0051170	BP	nuclear import	8	Q8IWX8,Q9NW64,Q5SRE5,O00505,Q8N1F7,Q99567,P57740,P35658,P09651,P00533,P49792,P55265,P02545,P52292,O00629
4.16e-19	157	20	GO:0051168	BP	nuclear export	8	P26368,Q96FV9,Q6P6C2,Q5SRE5,P78406,Q8N1F7,Q99567,Q7KZ85,P57740,P84103,P52298,P22626,P35658,P09651,Q09161,Q01081,P55265,Q01130,Q9H814,P82979
6.83e-22	96	19	GO:0006405	BP	RNA export from nucleus	9	P26368,Q96FV9,Q6P6C2,Q5SRE5,P78406,Q8N1F7,Q99567,Q7KZ85,P57740,P84103,P52298,P22626,P35658,P09651,Q09161,Q01081,Q01130,Q9H814,P82979
4.94e-09	1022	27	GO:0006886	BP	intracellular protein transport	6	P26368,Q9Y2W2,Q8IWX8,Q9NW64,Q5SRE5,O00505,Q8N1F7,Q99567,P57740,O95573,P35658,O60220,Q00610,P49458,P00533,P49792,Q01081,P55265,P02545,P04843,P53367,Q10713,Q13636,P52292,O00629,P31150,O75340
1	228	2	GO:0051650	BP	establishment of vesicle localization	5	O00161,Q15061
1	108	1	GO:0097480	BP	establishment of synaptic vesicle localization	6	O00161
1	15	1	GO:0040023	BP	establishment of nucleus localization	5	Q15061
1	10	1	GO:0007097	BP	nuclear migration	6	Q15061
1	61	2	GO:0051303	BP	establishment of chromosome localization	5	Q99661,Q9BW19
1	286	6	GO:0051235	BP	maintenance of location	3	Q8IWX8,P09038,Q99541,Q14643,P52789,P17706
1	119	3	GO:0051238	BP	sequestering of metal ion	4	Q8IWX8,P09038,Q14643
1	96	1	GO:0045185	BP	maintenance of protein location	4	P52789
1	62	2	GO:0019915	BP	lipid storage	4	Q99541,P17706
2.27e-13	4182	65	GO:1902578	BP	single-organism localization	3	P31930,Q13642,P26368,Q00325,Q96FV9,P55809,Q9Y2W2,Q8IWX8,Q9NW64,Q6P6C2,O00161,Q5SRE5,P78406,Q14155,O00505,Q8N1F7,Q99567,Q7KZ85,P50416,P06576,P57740,P84103,P52298,A0FGR8,Q15651,P22626,O95573,P35658,O60220,O43852,P36543,P10606,Q09161,P09038,Q00610,Q99661,O43768,P49458,O75915,P00533,Q99541,P00367,Q14643,P25705,P49792,P52789,Q01081,P55265,P02545,Q01130,Q15061,P04843,P53367,P61221,Q9H814,Q10713,P42765,…
4.1e-13	4002	63	GO:0044765	BP	single-organism transport	4	P31930,Q13642,P26368,Q00325,Q96FV9,P55809,Q9Y2W2,Q8IWX8,Q9NW64,Q6P6C2,O00161,Q5SRE5,P78406,Q14155,O00505,Q8N1F7,Q99567,Q7KZ85,P50416,P06576,P57740,P84103,P52298,A0FGR8,Q15651,P22626,O95573,P35658,O60220,O43852,P36543,P10606,Q09161,P09038,Q00610,O43768,P49458,O75915,P00533,Q99541,P00367,Q14643,P25705,P49792,P52789,Q01081,P55265,P02545,Q01130,Q15061,P04843,P53367,P61221,Q9H814,Q10713,P42765,Q13636,…
1	159	5	GO:0006818	BP	hydrogen transport	5	P31930,P06576,P36543,P10606,P25705
0.146	3	2	GO:0051030	BP	snRNA transport	5	P52298,Q9H814
7.25e-18	1742	47	GO:1902582	BP	single-organism intracellular transport	5	P26368,Q96FV9,Q9Y2W2,Q8IWX8,Q9NW64,Q6P6C2,O00161,Q5SRE5,P78406,O00505,Q8N1F7,Q99567,Q7KZ85,P50416,P06576,P57740,P84103,P52298,P22626,O95573,P35658,O60220,Q09161,P09038,Q00610,P49458,P00533,Q14643,P25705,P49792,P52789,Q01081,P55265,P02545,Q01130,Q15061,P04843,Q9H814,Q10713,P42765,Q13636,P09543,P52292,O00629,P08174,P31150,P82979
3.08e-07	277	14	GO:1902593	BP	single-organism nuclear import	6	Q8IWX8,Q9NW64,Q5SRE5,O00505,Q8N1F7,Q99567,P57740,P35658,P00533,P49792,P55265,P02545,P52292,O00629
5.48e-17	94	16	GO:0071426	BP	ribonucleoprotein complex export from nucleus	6	P26368,Q96FV9,Q6P6C2,P78406,Q8N1F7,Q99567,Q7KZ85,P57740,P84103,P52298,P22626,P35658,Q09161,Q01081,Q01130,P82979
1	11	1	GO:0071428	BP	rRNA-containing ribonucleoprotein complex export from nucleus	7	Q99567
5.26e-18	82	16	GO:0071427	BP	mRNA-containing ribonucleoprotein complex export from nucleus	7	P26368,Q96FV9,Q6P6C2,P78406,Q8N1F7,Q99567,Q7KZ85,P57740,P84103,P52298,P22626,P35658,Q09161,Q01081,Q01130,P82979
5.26e-18	82	16	GO:0006406	BP	mRNA export from nucleus	8	P26368,Q96FV9,Q6P6C2,P78406,Q8N1F7,Q99567,Q7KZ85,P57740,P84103,P52298,P22626,P35658,Q09161,Q01081,Q01130,P82979
1	250	1	GO:0016197	BP	endosomal transport	6	Q00610
1	68	1	GO:0042147	BP	retrograde transport, endosome to Golgi	7	Q00610
1	126	1	GO:0030705	BP	cytoskeleton-dependent intracellular transport	6	Q15061
0.000418	283	11	GO:0006839	BP	mitochondrial transport	6	P26368,Q9Y2W2,P50416,P06576,O60220,P25705,P52789,Q01081,Q10713,P42765,P09543
1	336	5	GO:0048193	BP	Golgi vesicle transport	6	O00161,O95573,Q00610,Q13636,P08174
1	120	4	GO:0006892	BP	post-Golgi vesicle-mediated transport	7	O00161,O95573,Q00610,Q13636
1	49	2	GO:0006893	BP	Golgi to plasma membrane transport	8	O95573,Q13636
1	171	1	GO:0006888	BP	ER to Golgi vesicle-mediated transport	7	P08174
2.49e-08	706	22	GO:0006605	BP	protein targeting	6	P26368,Q9Y2W2,Q8IWX8,Q9NW64,Q5SRE5,O00505,Q8N1F7,Q99567,P57740,P35658,O60220,P49458,P00533,P49792,Q01081,P55265,P02545,P04843,Q10713,P52292,O00629,P31150
1	56	3	GO:0006611	BP	protein export from nucleus	6	Q99567,P35658,P55265
0.0487	2	2	GO:0006408	BP	snRNA export from nucleus	6	P52298,Q9H814
1	14	1	GO:0016973	BP	poly(A)+ mRNA export from nucleus	6	Q8N1F7
1	306	4	GO:0015849	BP	organic acid transport	5	P50416,O95573,O75915,Q99541
1	236	1	GO:0015850	BP	organic hydroxy compound transport	5	P50416
1	1096	13	GO:0046903	BP	secretion	5	P55809,O00161,Q14155,P50416,Q15651,O95573,O43852,O43768,P00367,Q14643,P52789,P53367,Q13636
1	100	1	GO:0007589	BP	body fluid secretion	6	P52789
1	1549	16	GO:0006811	BP	ion transport	5	P31930,Q13642,Q00325,Q8IWX8,O00161,P50416,P06576,O95573,P36543,P10606,P09038,Q00610,O75915,Q99541,Q14643,P25705
1	582	5	GO:0006820	BP	anion transport	6	Q00325,P50416,O95573,O75915,Q99541
1	130	1	GO:0015698	BP	inorganic anion transport	7	Q00325
1	18	1	GO:0006817	BP	phosphate ion transport	8	Q00325
1	426	4	GO:0015711	BP	organic anion transport	7	P50416,O95573,O75915,Q99541
1	304	4	GO:0046942	BP	carboxylic acid transport	8	P50416,O95573,O75915,Q99541
1	91	1	GO:0006835	BP	dicarboxylic acid transport	9	O75915
1	154	3	GO:0015718	BP	monocarboxylic acid transport	9	P50416,O95573,Q99541
1	150	1	GO:0006865	BP	amino acid transport	9	O75915
1	26	1	GO:0015800	BP	acidic amino acid transport	10	O75915
1	63	1	GO:0015807	BP	L-amino acid transport	10	O75915
1	23	1	GO:0015813	BP	L-glutamate transport	11	O75915
1	1052	12	GO:0006812	BP	cation transport	6	P31930,Q13642,Q8IWX8,O00161,P50416,P06576,P36543,P10606,P09038,Q00610,Q14643,P25705
1	38	2	GO:0072512	BP	trivalent inorganic cation transport	7	P36543,Q00610
1	430	3	GO:0072511	BP	divalent inorganic cation transport	7	Q8IWX8,P09038,Q14643
1	584	8	GO:0015672	BP	monovalent inorganic cation transport	7	P31930,Q13642,O00161,P50416,P06576,P36543,P10606,P25705
1	91	2	GO:0015696	BP	ammonium transport	8	O00161,P50416
1	11	1	GO:0051608	BP	histamine transport	9	O00161
1	9	1	GO:0001821	BP	histamine secretion	10	O00161
1	157	5	GO:0015992	BP	proton transport	8	P31930,P06576,P36543,P10606,P25705
1	813	6	GO:0030001	BP	metal ion transport	7	Q13642,Q8IWX8,P36543,P09038,Q00610,Q14643
1	110	2	GO:0000041	BP	transition metal ion transport	8	P36543,Q00610
1	57	2	GO:0006826	BP	iron ion transport	9	P36543,Q00610
1	38	2	GO:0015682	BP	ferric iron transport	10	P36543,Q00610
1	36	2	GO:0033572	BP	transferrin transport	11	P36543,Q00610
1	427	3	GO:0070838	BP	divalent metal ion transport	8	Q8IWX8,P09038,Q14643
1	380	3	GO:0006816	BP	calcium ion transport	9	Q8IWX8,P09038,Q14643
1	151	3	GO:0070509	BP	calcium ion import	10	Q8IWX8,P09038,Q14643
1	126	3	GO:0060401	BP	cytosolic calcium ion transport	10	Q8IWX8,P09038,Q14643
1	217	1	GO:0006813	BP	potassium ion transport	8	Q13642
1	183	1	GO:0006836	BP	neurotransmitter transport	5	O00161
1	50	1	GO:0042044	BP	fluid transport	5	Q14643
0.0112	191	8	GO:0008643	BP	carbohydrate transport	5	Q5SRE5,P78406,Q8N1F7,Q99567,P57740,P35658,P49792,P52789
0.00216	153	8	GO:0015749	BP	monosaccharide transport	6	Q5SRE5,P78406,Q8N1F7,Q99567,P57740,P35658,P49792,P52789
0.00195	151	8	GO:0008645	BP	hexose transport	7	Q5SRE5,P78406,Q8N1F7,Q99567,P57740,P35658,P49792,P52789
0.00176	149	8	GO:0015758	BP	glucose transport	8	Q5SRE5,P78406,Q8N1F7,Q99567,P57740,P35658,P49792,P52789
1	76	1	GO:0046323	BP	glucose import	9	P52789
1	368	7	GO:0042886	BP	amide transport	5	P55809,Q14155,P50416,Q15651,O43768,P00367,Q14643
1	344	7	GO:0015833	BP	peptide transport	6	P55809,Q14155,P50416,Q15651,O43768,P00367,Q14643
1	281	7	GO:0002790	BP	peptide secretion	7	P55809,Q14155,P50416,Q15651,O43768,P00367,Q14643
1	18	1	GO:0015697	BP	quaternary ammonium group transport	5	P50416
1	14	1	GO:0015838	BP	amino-acid betaine transport	6	P50416
1	13	1	GO:0015879	BP	carnitine transport	7	P50416
1	240	1	GO:0006909	BP	phagocytosis	5	Q14643
1	309	4	GO:0006869	BP	lipid transport	5	P50416,A0FGR8,O95573,Q99541
1	22	1	GO:0032365	BP	intracellular lipid transport	6	P50416
1	83	3	GO:0015908	BP	fatty acid transport	6	P50416,O95573,Q99541
1	51	3	GO:0015909	BP	long-chain fatty acid transport	7	P50416,O95573,Q99541
1	7	1	GO:0044539	BP	long-chain fatty acid import	8	O95573
0.631	339	8	GO:0009914	BP	hormone transport	5	P55809,O00161,Q14155,P50416,Q15651,O43768,P00367,Q14643
2.55e-06	326	14	GO:0017038	BP	protein import	5	Q8IWX8,Q9NW64,Q5SRE5,O00505,Q8N1F7,Q99567,P57740,P35658,P00533,P49792,P55265,P02545,P52292,O00629
1	9	1	GO:0072321	BP	chaperone-mediated protein transport	5	O60220
3.22e-08	1284	29	GO:1902580	BP	single-organism cellular localization	4	P26368,Q9Y2W2,Q8IWX8,Q9NW64,O00161,Q5SRE5,O00505,Q8N1F7,Q99567,P57740,O95573,P35658,O60220,Q00610,Q99661,P49458,P00533,P49792,Q01081,P55265,P02545,Q15061,P04843,Q10713,Q13636,P52292,O00629,P31150,Q9BW19
1	41	1	GO:0099518	BP	vesicle cytoskeletal trafficking	5	Q15061
3.08e-07	277	14	GO:0044744	BP	protein targeting to nucleus	5	Q8IWX8,Q9NW64,Q5SRE5,O00505,Q8N1F7,Q99567,P57740,P35658,P00533,P49792,P55265,P02545,P52292,O00629
1	108	1	GO:0048489	BP	synaptic vesicle transport	5	O00161
1	114	2	GO:0045047	BP	protein targeting to ER	5	P49458,P04843
3.08e-07	277	14	GO:0006606	BP	protein import into nucleus	5	Q8IWX8,Q9NW64,Q5SRE5,O00505,Q8N1F7,Q99567,P57740,P35658,P00533,P49792,P55265,P02545,P52292,O00629
1	51	1	GO:0000060	BP	protein import into nucleus, translocation	6	Q9NW64
1	100	1	GO:0042991	BP	transcription factor import into nucleus	6	Q8IWX8
1	17	1	GO:0051531	BP	NFAT protein import into nucleus	7	Q8IWX8
1	28	1	GO:0035411	BP	catenin import into nucleus	6	P00533
0.00961	23	4	GO:0006607	BP	NLS-bearing protein import into nucleus	6	O00505,P49792,P52292,O00629
2.66e-26	8574	122	GO:0050896	BP	response to stimulus	2	O75223,Q9UIG0,P31930,P51948,P49959,Q14126,P26368,Q15054,Q13362,Q96FV9,P55809,Q9Y2W2,P40939,Q9NW64,Q9BXP5,P30086,P35637,Q15773,Q6P6C2,O00161,Q5SRE5,Q99459,P61218,Q92841,Q13573,Q9UKV3,P27695,Q9HCK8,P78406,Q14155,O00505,Q8N1F7,P49005,Q9Y657,Q99567,P17844,Q7KZ85,P50416,P57740,P53999,P23246,O15446,Q15651,Q9NRZ9,P54278,P22626,Q15014,O95573,Q32MZ4,P35269,P61244,Q12931,P35658,P51532,O43852,P36543,P61289,…
0.000455	1747	27	GO:0009719	BP	response to endogenous stimulus	3	P31930,Q14126,P55809,P40939,P30086,Q99459,Q13573,P27695,P61244,P36543,P61289,P21266,P09038,Q8IZL8,O00622,P10809,P00533,Q14643,Q00839,P49792,Q6YHK3,Q13636,Q8NEM2,P17706,P08047,P08174,P36776
0.225	1312	18	GO:0071495	BP	cellular response to endogenous stimulus	4	P30086,Q99459,Q13573,P27695,P61244,P36543,P61289,P09038,Q8IZL8,O00622,P00533,Q14643,Q00839,Q6YHK3,Q13636,Q8NEM2,P17706,P08047
8.38e-17	4445	73	GO:0042221	BP	response to chemical	3	O75223,P31930,P51948,Q14126,P55809,P40939,Q9NW64,Q9BXP5,P30086,P35637,Q5SRE5,Q99459,Q13573,P27695,P78406,Q14155,O00505,Q8N1F7,Q99567,P50416,P57740,P23246,Q15651,P54278,P22626,O95573,P61244,Q12931,P35658,P51532,O43852,P36543,P61289,P21266,Q9NZM1,P09038,Q8IZL8,O00622,O43768,P10809,O75915,P00533,P38159,Q99541,P46013,Q14643,Q00839,P49792,Q6YHK3,P55265,P02545,P25815,P30048,Q9NR30,P35232,P42765,Q13636,…
1	332	3	GO:0001101	BP	response to acid chemical	4	Q13573,P50416,P00533
1.14e-05	1660	29	GO:1901700	BP	response to oxygen-containing compound	4	Q14126,P55809,P40939,P30086,Q99459,Q13573,P27695,P50416,Q15651,P61244,Q12931,P51532,P36543,P61289,P09038,O43768,P10809,P00533,Q00839,P30048,Q13636,P09543,P17706,Q13151,Q13330,O00629,P08174,Q6PD62,P07203
0.000308	1087	21	GO:1901698	BP	response to nitrogen compound	4	P31930,P40939,Q9BXP5,P30086,Q99459,P27695,P22626,P61244,P36543,P61289,P21266,P09038,P10809,P00533,P49792,P55265,Q9NR30,Q13636,Q9H2U1,P17706,P08174
1	97	1	GO:0060359	BP	response to ammonium ion	5	P10809
1.61e-18	3009	62	GO:0010033	BP	response to organic substance	4	P31930,Q14126,P55809,P40939,Q9BXP5,P30086,Q5SRE5,Q99459,Q13573,P27695,P78406,Q14155,O00505,Q8N1F7,Q99567,P50416,P57740,Q15651,P22626,O95573,P61244,P35658,P51532,O43852,P36543,P61289,P21266,Q9NZM1,P09038,Q8IZL8,O00622,O43768,P10809,P00533,P38159,Q99541,P46013,Q14643,Q00839,P49792,Q6YHK3,P55265,P02545,P25815,P30048,Q9NR30,P35232,Q13636,Q8NEM2,P09543,Q9H2U1,P17706,Q13151,P34897,P52292,Q13330,P08047,…
1	175	3	GO:1901654	BP	response to ketone	5	Q14126,Q99459,Q00839
0.000799	862	18	GO:0034097	BP	response to cytokine	5	Q5SRE5,Q99459,P78406,O00505,Q8N1F7,Q99567,P57740,P35658,P61289,P38159,P49792,P55265,P35232,P17706,P34897,P52292,O00629,Q6PD62
1	10	1	GO:0036005	BP	response to macrophage colony-stimulating factor	6	P17706
1	9	2	GO:0070669	BP	response to interleukin-2	6	Q99459,P17706
1	19	1	GO:0035455	BP	response to interferon-alpha	6	P55265
1	283	2	GO:0034612	BP	response to tumor necrosis factor	6	P61289,P17706
1	32	1	GO:0070670	BP	response to interleukin-4	6	P17706
1	32	3	GO:0070741	BP	response to interleukin-6	6	P35232,P17706,Q6PD62
1	119	1	GO:0070555	BP	response to interleukin-1	6	P38159
0.649	952	14	GO:0070848	BP	response to growth factor	5	P30086,Q99459,Q13573,Q14155,P61289,Q9NZM1,P09038,O00622,P00533,Q14643,Q6YHK3,Q8NEM2,P08047,O75340
1	156	1	GO:0071772	BP	response to BMP	6	O00622
1	31	1	GO:0070849	BP	response to epidermal growth factor	6	P00533
1	40	1	GO:1990089	BP	response to nerve growth factor	6	Q99459
1	347	7	GO:0071774	BP	response to fibroblast growth factor	6	P30086,Q99459,P61289,P09038,P00533,Q14643,Q8NEM2
1	249	3	GO:0071559	BP	response to transforming growth factor beta	6	Q13573,Q6YHK3,P08047
0.27	873	14	GO:0033993	BP	response to lipid	5	Q14126,Q13573,P50416,P21266,Q8IZL8,P10809,P00533,Q00839,P30048,P09543,Q13151,Q13330,P08174,Q6PD62
1	114	1	GO:0032526	BP	response to retinoic acid	6	Q13573
1	84	1	GO:0070542	BP	response to fatty acid	6	P50416
5.49e-05	890	20	GO:0014070	BP	response to organic cyclic compound	5	Q14126,Q9BXP5,Q99459,Q13573,P27695,P78406,P50416,P22626,O95573,O43852,P21266,Q8IZL8,P10809,P00533,Q99541,P46013,Q00839,P55265,Q9NR30,Q9H2U1
1	1	1	GO:1904567	BP	response to wortmannin	6	Q99459
0.0896	78	5	GO:0043331	BP	response to dsRNA	6	Q9BXP5,P22626,P55265,Q9NR30,Q9H2U1
1	48	2	GO:0043330	BP	response to exogenous dsRNA	7	Q9NR30,Q9H2U1
1	140	2	GO:0046683	BP	response to organophosphorus	5	P27695,P10809
1	227	4	GO:0009743	BP	response to carbohydrate	5	P55809,Q15651,P51532,O43768
1	200	4	GO:0034284	BP	response to monosaccharide	6	P55809,Q15651,P51532,O43768
1	191	4	GO:0009746	BP	response to hexose	7	P55809,Q15651,P51532,O43768
1	186	4	GO:0009749	BP	response to glucose	8	P55809,Q15651,P51532,O43768
0.00478	1080	19	GO:0009725	BP	response to hormone	5	Q14126,P55809,P40939,P30086,Q99459,P27695,P61244,P36543,P61289,P21266,P09038,Q8IZL8,P10809,P00533,Q00839,Q13636,P17706,P08174,P36776
1	450	6	GO:0048545	BP	response to steroid hormone	6	Q14126,P21266,Q8IZL8,P10809,P00533,Q00839
1	181	1	GO:0031960	BP	response to corticosteroid	7	Q00839
1	169	1	GO:0051384	BP	response to glucocorticoid	8	Q00839
1	225	4	GO:0043627	BP	response to estrogen	7	P21266,Q8IZL8,P10809,P00533
1	42	1	GO:0032570	BP	response to progesterone	7	Q14126
1	380	4	GO:0097305	BP	response to alcohol	5	P55809,Q13573,P00533,Q00839
1	140	1	GO:0045471	BP	response to ethanol	6	P55809
1	149	1	GO:0032355	BP	response to estradiol	6	P00533
1	34	1	GO:0071548	BP	response to dexamethasone	6	Q00839
0.317	998	15	GO:0010243	BP	response to organonitrogen compound	5	P31930,P40939,P30086,Q99459,P27695,P61244,P36543,P61289,P09038,P10809,P00533,P49792,Q13636,P17706,P08174
1	147	2	GO:0043279	BP	response to alkaloid	6	P31930,P10809
1	51	1	GO:0042220	BP	response to cocaine	7	P10809
1	52	1	GO:0014075	BP	response to amine	6	P49792
1	34	1	GO:0001975	BP	response to amphetamine	7	P49792
0.231	652	12	GO:1901652	BP	response to peptide	6	P40939,P30086,Q99459,P27695,P61244,P36543,P61289,P09038,P00533,Q13636,P17706,P08174
0.136	616	12	GO:0043434	BP	response to peptide hormone	7	P40939,P30086,Q99459,P27695,P61244,P36543,P61289,P09038,P00533,Q13636,P17706,P08174
1	463	9	GO:0032868	BP	response to insulin	8	P40939,P30086,P61244,P36543,P61289,P09038,P00533,Q13636,P17706
1	3	1	GO:1990637	BP	response to prolactin	8	Q99459
1	161	2	GO:0014074	BP	response to purine-containing compound	6	P27695,P10809
1	32	1	GO:0033198	BP	response to ATP	7	P10809
1	103	1	GO:0051591	BP	response to cAMP	7	P27695
1	117	1	GO:0043200	BP	response to amino acid	6	P00533
0.13	519	11	GO:0010035	BP	response to inorganic substance	4	P51948,P35637,P27695,Q12931,P10809,P30048,O00629,P36776,P31150,P07203,O75340
1	349	5	GO:0010038	BP	response to metal ion	5	P51948,P35637,P36776,P31150,O75340
1	6	1	GO:0010044	BP	response to aluminum ion	6	P36776
1	120	4	GO:0051592	BP	response to calcium ion	6	P51948,P35637,P31150,O75340
1	8	1	GO:0010269	BP	response to selenium ion	5	P07203
1	28	1	GO:0046685	BP	response to arsenic-containing substance	4	Q9BXP5
1	449	8	GO:0042493	BP	response to drug	4	P55809,P40939,Q9NW64,P27695,P50416,P54278,P10809,Q99541
1	202	3	GO:0009410	BP	response to xenobiotic stimulus	4	O75223,P21266,P07203
1	255	4	GO:0009636	BP	response to toxic substance	4	P21266,P30048,P09543,P07203
0.000276	984	20	GO:0009607	BP	response to biotic stimulus	3	Q6P6C2,Q9UKV3,Q8N1F7,P35269,Q9H1D9,P17096,P10809,Q13112,P55265,P61221,P30048,Q9NR30,P09543,Q9H2U1,Q13151,Q13330,Q9BUI4,P08174,Q6PD62,P07203
1	18	1	GO:0002347	BP	response to tumor cell	4	P10809
1	72	2	GO:0014823	BP	response to activity	3	P31930,P55809
3.56e-22	4101	78	GO:0006950	BP	response to stress	3	Q9UIG0,P51948,P49959,P26368,Q15054,Q13362,Q96FV9,P55809,Q9Y2W2,P30086,Q15773,Q6P6C2,O00161,Q5SRE5,Q99459,P61218,Q13573,Q9UKV3,P27695,P78406,Q8N1F7,P49005,Q99567,P17844,P57740,P23246,P54278,Q15014,Q32MZ4,P61244,Q12931,P35658,O43852,P61289,Q9H1D9,P21266,P51946,Q9C0J8,P17096,Q9NZM1,P09038,Q9Y6I4,O00622,Q99661,P10809,O75915,P00533,Q6XQN6,P46013,Q14643,P49792,Q6YHK3,Q13112,P52789,Q01081,P55265,P02545,…
1	181	3	GO:0035966	BP	response to topologically incorrect protein	4	P10809,P02545,P17706
1	16	1	GO:0051788	BP	response to misfolded protein	5	P10809
1	170	3	GO:0006986	BP	response to unfolded protein	5	P10809,P02545,P17706
0.0052	1867	26	GO:0006952	BP	defense response	4	P49959,P30086,Q15773,Q6P6C2,O00161,P61218,Q9UKV3,Q8N1F7,Q32MZ4,P61289,Q9H1D9,P09038,P10809,P00533,Q14643,Q13112,P55265,P35232,Q9H2U1,P17706,Q13151,P34897,Q13330,Q9BUI4,P08174,P07203
1	656	8	GO:0006954	BP	inflammatory response	5	O00161,P10809,P35232,P17706,Q13151,Q13330,P08174,P07203
1	145	2	GO:0002526	BP	acute inflammatory response	6	P35232,P08174
1	11	1	GO:0006991	BP	response to sterol depletion	4	P02545
0.716	1078	15	GO:0009611	BP	response to wounding	4	P61244,O43852,Q9NZM1,P09038,O00622,Q99661,P10809,Q14643,Q6YHK3,P35232,P17706,Q13330,P08174,P07203,Q9BW19
1	753	9	GO:0042060	BP	wound healing	5	O43852,Q9NZM1,P09038,O00622,Q99661,Q14643,Q6YHK3,P07203,Q9BW19
1	67	3	GO:0048678	BP	response to axon injury	5	P61244,O43852,P09038
1	32	1	GO:0002931	BP	response to ischemia	4	P52789
0.0123	401	11	GO:0006979	BP	response to oxidative stress	4	P27695,P23246,Q12931,P10809,O75915,Q6XQN6,O75475,P30048,O00629,P36776,P07203
1	18	1	GO:0033194	BP	response to hydroperoxide	5	P07203
1	222	6	GO:0000302	BP	response to reactive oxygen species	5	P27695,Q12931,P10809,P30048,O00629,P07203
0.0907	128	6	GO:0042542	BP	response to hydrogen peroxide	6	P27695,Q12931,P10809,P30048,O00629,P07203
0.000542	1226	22	GO:0009628	BP	response to abiotic stimulus	3	Q6P6C2,Q5SRE5,P78406,Q8N1F7,Q99567,P57740,P35658,Q9NZM1,P10809,P00533,P46013,Q14643,P49792,P02545,O75475,Q15004,P42765,Q13330,P36776,P05114,P07203,O75340
1	334	6	GO:0070482	BP	response to oxygen levels	4	Q6P6C2,P10809,Q14643,P02545,P42765,P36776
1	316	6	GO:0036293	BP	response to decreased oxygen levels	5	Q6P6C2,P10809,Q14643,P02545,P42765,P36776
1	307	6	GO:0001666	BP	response to hypoxia	6	Q6P6C2,P10809,Q14643,P02545,P42765,P36776
1	511	5	GO:0009314	BP	response to radiation	4	P00533,Q15004,Q13330,P05114,P07203
1	374	5	GO:0009416	BP	response to light stimulus	5	P00533,Q15004,Q13330,P05114,P07203
1	133	4	GO:0009411	BP	response to UV	6	P00533,Q15004,P05114,P07203
1	6	1	GO:0070141	BP	response to UV-A	7	P00533
1	12	1	GO:0009650	BP	UV protection	7	P07203
1	14	1	GO:0010225	BP	response to UV-C	7	P05114
1	18	1	GO:0010224	BP	response to UV-B	7	P05114
1	24	1	GO:0009648	BP	photoperiodism	6	Q13330
1	149	2	GO:0010212	BP	response to ionizing radiation	5	Q13330,P07203
1	53	1	GO:0010332	BP	response to gamma radiation	6	P07203
5.42e-06	234	12	GO:0009266	BP	response to temperature stimulus	4	Q5SRE5,P78406,Q8N1F7,Q99567,P57740,P35658,Q9NZM1,P10809,P46013,P49792,O75475,O75340
1	49	1	GO:0009409	BP	response to cold	5	P10809
1.3e-07	169	12	GO:0009408	BP	response to heat	5	Q5SRE5,P78406,Q8N1F7,Q99567,P57740,P35658,Q9NZM1,P10809,P46013,P49792,O75475,O75340
1	772	3	GO:0051606	BP	detection of stimulus	3	Q15054,P49005,P10809
1	530	1	GO:0009593	BP	detection of chemical stimulus	4	P10809
1	1	1	GO:0002236	BP	detection of misfolded protein	5	P10809
4.1e-06	2565	38	GO:0009605	BP	response to external stimulus	3	P26368,P55809,Q9Y2W2,P30086,Q6P6C2,Q13573,Q9UKV3,Q14155,Q8N1F7,O95573,P35269,P61244,P61289,Q9H1D9,P17096,P09038,O00622,O43768,P10809,P00533,Q6YHK3,Q13112,Q01081,P55265,P02545,P61221,P30048,Q9NR30,P35232,P09543,Q9H2U1,P17706,Q13151,Q13330,Q9BUI4,P08174,Q6PD62,P07203
1	285	2	GO:0071496	BP	cellular response to external stimulus	4	Q13573,P61244
1	870	7	GO:0042330	BP	taxis	4	P30086,Q14155,P61289,P09038,O00622,P00533,P17706
1	870	7	GO:0006935	BP	chemotaxis	5	P30086,Q14155,P61289,P09038,O00622,P00533,P17706
1	54	1	GO:0050918	BP	positive chemotaxis	6	P09038
0.00015	947	20	GO:0043207	BP	response to external biotic stimulus	4	Q6P6C2,Q9UKV3,Q8N1F7,P35269,Q9H1D9,P17096,P10809,Q13112,P55265,P61221,P30048,Q9NR30,P09543,Q9H2U1,Q13151,Q13330,Q9BUI4,P08174,Q6PD62,P07203
1	552	8	GO:0009991	BP	response to extracellular stimulus	4	P26368,P55809,Q9Y2W2,Q13573,O95573,P61244,O43768,Q01081
1	522	8	GO:0031667	BP	response to nutrient levels	5	P26368,P55809,Q9Y2W2,Q13573,O95573,P61244,O43768,Q01081
1	164	2	GO:0042594	BP	response to starvation	6	P55809,P61244
1	205	4	GO:0007584	BP	response to nutrient	6	P55809,Q13573,O95573,O43768
1	106	1	GO:0033273	BP	response to vitamin	7	Q13573
1	39	1	GO:0033280	BP	response to vitamin D	8	Q13573
1	221	1	GO:0009612	BP	response to mechanical stimulus	4	P02545
1	98	2	GO:0072376	BP	protein activation cascade	3	P35232,P08174
2.8e-68	6327	155	GO:0071840	BP	cellular component organization or biogenesis	2	O75223,Q9NQ29,Q9UIG0,Q9Y5J1,Q9NQW6,P51948,P49959,Q13642,Q14126,Q9Y3C1,P26368,P04181,O43709,Q969G3,O75530,Q15054,Q9NTI5,Q96MU7,Q9Y2W2,Q9NW64,Q9ULW0,P30086,O00161,Q5SRE5,O00541,Q13573,Q9UKV3,P27695,Q9HCK8,P78406,Q9NV56,Q14155,O00505,Q8N1F7,P49711,O75822,Q16698,P49005,Q9Y657,Q99567,O95232,Q7KZ85,P50416,P06576,P57740,Q16630,P46087,O43598,Q8TDN6,P52298,P23246,Q6PI48,P07339,Q15651,Q9NRZ9,O75691,P13674,…
2.1e-35	2671	79	GO:0044085	BP	cellular component biogenesis	3	Q9NQ29,Q9Y5J1,Q9NQW6,P51948,Q9Y3C1,P26368,P04181,O43709,Q96MU7,Q9Y2W2,Q9NW64,Q9ULW0,O00161,O00541,Q14155,O00505,Q8N1F7,P49711,O75822,Q16698,Q99567,O95232,P50416,P57740,Q16630,P46087,Q8TDN6,P52298,Q9NRZ9,O75691,Q9P032,O95573,Q96GQ7,P61244,Q92979,Q16718,Q8IWC1,Q9NVN8,Q96P11,O60832,Q9NY93,Q09161,Q9GZS1,P17096,Q99590,O00622,Q7Z3K3,P10809,Q9Y383,P38159,O75683,Q8N684,Q9NR56,Q96SI1,Q9BVJ6,Q13112,P55265,…
1.02e-08	1400	31	GO:0070271	BP	protein complex biogenesis	4	Q9NQW6,P51948,P04181,Q9ULW0,O00161,O00505,Q8N1F7,Q16698,P50416,P57740,Q16630,Q9P032,P61244,Q16718,Q8IWC1,P17096,Q7Z3K3,P10809,P38159,Q8N684,Q96SI1,Q13112,P53367,P18754,P34897,P13984,P07305,P36776,P62805,Q9BW19,Q9Y697
1	63	2	GO:0097031	BP	mitochondrial respiratory chain complex I biogenesis	5	Q9P032,Q16718
5.06e-37	382	40	GO:0022613	BP	ribonucleoprotein complex biogenesis	4	Q9NQ29,Q9Y5J1,Q9Y3C1,P26368,O43709,Q96MU7,Q9Y2W2,Q9NW64,O00541,O75822,Q99567,O95232,P46087,Q8TDN6,P52298,O75691,Q96GQ7,Q92979,Q9NVN8,Q96P11,O60832,Q9NY93,Q09161,Q99590,Q9Y383,O75683,Q9NR56,Q9BVJ6,P55265,Q9H814,Q9NV06,O75475,Q9NR30,Q2NL82,O95400,Q9BTL3,Q9Y3B2,Q9BUQ8,Q9ULC4,Q9Y2R4
3.09e-18	235	22	GO:0042254	BP	ribosome biogenesis	5	Q9Y5J1,Q9Y3C1,O43709,Q9Y2W2,O00541,Q99567,P46087,Q8TDN6,O75691,Q96GQ7,Q92979,Q9NVN8,Q96P11,O60832,Q9NY93,O75683,Q9BVJ6,Q9NV06,Q9NR30,Q2NL82,Q9Y3B2,Q9Y2R4
1	8	1	GO:0000054	BP	ribosomal subunit export from nucleus	6	Q99567
1	6	1	GO:0000055	BP	ribosomal large subunit export from nucleus	7	Q99567
1	4	1	GO:0000056	BP	ribosomal small subunit export from nucleus	7	Q99567
1	43	3	GO:0042273	BP	ribosomal large subunit biogenesis	5	Q9Y3C1,O00541,Q8TDN6
1	49	3	GO:0042274	BP	ribosomal small subunit biogenesis	5	O75691,Q92979,Q9NV06
5.07e-07	6347	69	GO:0023052	BP	signaling	2	O75223,Q9UIG0,Q14126,Q13362,Q96FV9,P55809,P30086,O00161,Q5SRE5,Q99459,Q92841,Q13573,Q9HCK8,P78406,Q14155,O00505,Q8N1F7,Q9Y657,Q99567,P17844,P50416,P57740,P53999,P23246,O15446,Q15651,Q9NRZ9,Q12931,P35658,P51532,P36543,P61289,Q9H0C8,Q9NZM1,P40818,P09038,O00622,Q99661,O43768,P10809,O75915,P00533,P00367,Q14643,P49792,Q6YHK3,P55265,P02545,P30533,P35232,P42765,Q13636,Q8NEM2,P09543,P17706,Q9P258,P52292,…
4.74e-07	6337	69	GO:0044700	BP	single organism signaling	3	O75223,Q9UIG0,Q14126,Q13362,Q96FV9,P55809,P30086,O00161,Q5SRE5,Q99459,Q92841,Q13573,Q9HCK8,P78406,Q14155,O00505,Q8N1F7,Q9Y657,Q99567,P17844,P50416,P57740,P53999,P23246,O15446,Q15651,Q9NRZ9,Q12931,P35658,P51532,P36543,P61289,Q9H0C8,Q9NZM1,P40818,P09038,O00622,Q99661,O43768,P10809,O75915,P00533,P00367,Q14643,P49792,Q6YHK3,P55265,P02545,P30533,P35232,P42765,Q13636,Q8NEM2,P09543,P17706,Q9P258,P52292,…
1.11e-06	2673	40	GO:0002376	BP	immune system process	2	Q9NQW6,O95394,P49959,Q96FV9,P30086,Q6P6C2,O00161,P61218,Q9UKV3,Q14155,Q8N1F7,Q7KZ85,P07339,Q9NRZ9,P54278,Q32MZ4,P61289,Q9H1D9,P09038,Q00610,Q99661,Q10471,P10809,P00533,Q14643,Q6YHK3,Q13112,P55265,P30048,P35232,Q9H2U1,P17706,P34897,P08047,Q9BUI4,P08174,P62805,Q86U70,Q6PD62,P07203
0.103	796	14	GO:0002252	BP	immune effector process	3	Q96FV9,Q6P6C2,O00161,Q9UKV3,Q8N1F7,Q7KZ85,Q9H1D9,P10809,Q14643,Q13112,P55265,P35232,Q9BUI4,P08174
1	311	5	GO:0002443	BP	leukocyte mediated immunity	4	Q96FV9,O00161,Q7KZ85,P10809,P08174
1	240	4	GO:0002449	BP	lymphocyte mediated immunity	5	Q96FV9,Q7KZ85,P10809,P08174
1	76	1	GO:0002444	BP	myeloid leukocyte mediated immunity	5	O00161
1	44	1	GO:0002448	BP	mast cell mediated immunity	6	O00161
0.3	159	6	GO:0002440	BP	production of molecular mediator of immune response	3	Q96FV9,Q7KZ85,P54278,Q10471,P10809,P08174
0.197	92	5	GO:0002377	BP	immunoglobulin production	4	Q96FV9,Q7KZ85,P54278,Q10471,P10809
1	3	1	GO:0002378	BP	immunoglobulin biosynthetic process	5	Q10471
1	241	4	GO:0019882	BP	antigen processing and presentation	3	P07339,P61289,Q00610,Q99661
1	99	3	GO:0002504	BP	antigen processing and presentation of peptide or polysaccharide antigen via MHC class II	4	P07339,Q00610,Q99661
1	181	4	GO:0019884	BP	antigen processing and presentation of exogenous antigen	4	P07339,P61289,Q00610,Q99661
1	194	4	GO:0048002	BP	antigen processing and presentation of peptide antigen	4	P07339,P61289,Q00610,Q99661
1	174	4	GO:0002478	BP	antigen processing and presentation of exogenous peptide antigen	5	P07339,P61289,Q00610,Q99661
1	107	1	GO:0002474	BP	antigen processing and presentation of peptide antigen via MHC class I	5	P61289
1	80	1	GO:0042590	BP	antigen processing and presentation of exogenous peptide antigen via MHC class I	6	P61289
1	76	1	GO:0002479	BP	antigen processing and presentation of exogenous peptide antigen via MHC class I, TAP-dependent	7	P61289
1	96	3	GO:0002495	BP	antigen processing and presentation of peptide antigen via MHC class II	5	P07339,Q00610,Q99661
1	92	3	GO:0019886	BP	antigen processing and presentation of exogenous peptide antigen via MHC class II	6	P07339,Q00610,Q99661
0.33	1728	21	GO:0006955	BP	immune response	3	P49959,Q96FV9,P30086,O00161,P61218,Q7KZ85,Q32MZ4,P61289,Q9H1D9,P09038,P10809,P00533,Q14643,P55265,P35232,Q9H2U1,P17706,P34897,Q9BUI4,P08174,P07203
1	369	4	GO:0002250	BP	adaptive immune response	4	Q96FV9,Q7KZ85,P10809,P08174
1	240	4	GO:0002460	BP	adaptive immune response based on somatic recombination of immune receptors built from immunoglobulin superfamily domains	5	Q96FV9,Q7KZ85,P10809,P08174
1	79	2	GO:0002456	BP	T cell mediated immunity	6	P10809,P08174
1	129	4	GO:0019724	BP	B cell mediated immunity	6	Q96FV9,Q7KZ85,P10809,P08174
1	126	4	GO:0016064	BP	immunoglobulin mediated immune response	7	Q96FV9,Q7KZ85,P10809,P08174
1	46	3	GO:0002381	BP	immunoglobulin production involved in immunoglobulin mediated immune response	8	Q96FV9,Q7KZ85,P10809
1	203	2	GO:0006959	BP	humoral immune response	4	P35232,P08174
1	70	1	GO:0002455	BP	humoral immune response mediated by circulating immunoglobulin	5	P08174
1	15	1	GO:0002418	BP	immune response to tumor cell	4	P10809
1	3	1	GO:0002424	BP	T cell mediated immune response to tumor cell	5	P10809
0.417	1140	16	GO:0045087	BP	innate immune response	4	P49959,P30086,P61218,Q32MZ4,P61289,Q9H1D9,P09038,P10809,P00533,Q14643,P55265,Q9H2U1,P17706,P34897,Q9BUI4,P08174
1	85	3	GO:0034340	BP	response to type I interferon	5	P55265,P17706,P34897
1	157	1	GO:0034341	BP	response to interferon-gamma	5	P17706
1	54	1	GO:0002437	BP	inflammatory response to antigenic stimulus	4	P07203
0.952	129	5	GO:0002262	BP	myeloid cell homeostasis	3	Q9UKV3,P55265,P17706,P08047,Q86U70
0.384	106	5	GO:0034101	BP	erythrocyte homeostasis	4	Q9UKV3,P55265,P17706,P08047,Q86U70
1	770	8	GO:0007610	BP	behavior	2	P50416,P16083,P09038,P00533,P09543,P17706,Q13330,Q8WXX5
1	206	2	GO:0007626	BP	locomotory behavior	3	P09543,Q13330
1	112	1	GO:0007631	BP	feeding behavior	3	P50416
1	31	1	GO:0042755	BP	eating behavior	4	P50416
1	48	1	GO:0007622	BP	rhythmic behavior	3	Q13330
1	47	1	GO:0048512	BP	circadian behavior	4	Q13330
1	446	4	GO:0044708	BP	single-organism behavior	3	P16083,P00533,P09543,Q13330
1	14	1	GO:0045475	BP	locomotor rhythm	4	Q13330
1.22e-126	15371	273	GO:0009987	BP	cellular process	2	P23511,O75223,Q9NQ29,Q9UIG0,P31930,Q9Y5J1,Q9NQW6,O95394,P51948,P49959,Q13642,Q14126,Q8IX12,O75390,P26368,P04181,Q15717,Q13428,O43709,O15460,P31040,Q969G3,O75530,Q00325,Q15054,Q13362,Q96FV9,Q9NTI5,P55809,Q96MU7,Q9Y2W2,P40939,Q8IWX8,Q9NW64,Q9BXP5,Q92945,Q9ULW0,P30086,P35637,Q9P2N5,Q6P6C2,Q9Y5N6,O00161,Q5SRE5,Q99459,Q96RN5,O00541,P61218,Q92841,Q96EK6,Q13573,Q6PJT7,Q9UKV3,P27695,Q9HCK8,Q9H307,P78406,…
1	1	1	GO:0036166	BP	phenotypic switching	3	P08047
0.619	522	10	GO:0006914	BP	autophagy	3	P26368,Q9Y2W2,Q6P6C2,Q9UKV3,Q8N1F7,P08621,P07339,Q13112,P52789,Q01081
0.904	358	8	GO:0016236	BP	macroautophagy	4	P26368,Q9Y2W2,Q6P6C2,Q9UKV3,Q8N1F7,Q13112,P52789,Q01081
1	9	1	GO:0061684	BP	chaperone-mediated autophagy	4	P08621
7.05e-53	12573	188	GO:0044763	BP	single-organism cellular process	3	P23511,O75223,Q9UIG0,P31930,Q9NQW6,O95394,P51948,P49959,Q13642,Q14126,Q8IX12,O75390,P26368,P04181,Q15717,O15460,P31040,Q969G3,O75530,Q00325,Q15054,Q13362,Q96FV9,Q9NTI5,P55809,Q9Y2W2,P40939,Q8IWX8,Q9BXP5,Q9ULW0,P30086,Q6P6C2,Q9Y5N6,O00161,Q5SRE5,Q99459,O00541,P61218,Q92841,Q96EK6,Q13573,Q9UKV3,P27695,Q9HCK8,P78406,Q9NV56,Q14155,O00505,Q8N1F7,P49711,Q16698,P06732,Q02218,P49005,Q9Y657,Q9UNW1,Q99567,…
0.000644	672	16	GO:0051301	BP	cell division	4	Q9NQW6,Q9NTI5,Q9ULW0,Q9NRZ9,P51946,P40818,P09038,Q99661,O43768,Q7Z3K3,P00533,Q8TAP9,Q9P258,P18754,O43663,Q9BW19
1.6e-08	6420	73	GO:0007154	BP	cell communication	4	O75223,Q9UIG0,Q14126,P26368,Q13362,Q96FV9,P55809,Q9Y2W2,P30086,O00161,Q5SRE5,Q99459,Q92841,Q13573,Q9HCK8,P78406,Q14155,O00505,Q8N1F7,Q9Y657,Q99567,P17844,P50416,P57740,P53999,P23246,O15446,Q15651,Q9NRZ9,P61244,Q12931,P35658,P51532,P36543,P61289,Q9H0C8,Q9NZM1,P40818,P09038,O00622,Q99661,O43768,P10809,O75915,P00533,P00367,Q14643,P49792,Q6YHK3,Q01081,P55265,P02545,P30533,P35232,P42765,Q13636,Q8NEM2,…
1	1229	10	GO:0007267	BP	cell-cell signaling	5	P55809,O00161,Q14155,P50416,Q15651,O00622,O43768,P00367,Q14643,P09543
1	716	2	GO:0099536	BP	synaptic signaling	6	O00161,P09543
1	716	2	GO:0099537	BP	trans-synaptic signaling	7	O00161,P09543
1	716	2	GO:0007268	BP	synaptic transmission	8	O00161,P09543
0.138	617	12	GO:0007017	BP	microtubule-based process	4	Q9ULW0,Q8IWC1,Q99661,Q9BV86,P02545,Q15061,Q15004,P09543,Q9P258,P18754,O43663,Q9BW19
1	1979	21	GO:0006928	BP	movement of cell or subcellular component	4	Q9NQW6,Q14126,Q8IX12,P30086,P27695,Q14155,Q02218,P06576,P61289,P09038,O00622,Q99661,P00533,P02545,Q15061,P25815,Q9P258,Q9Y5S2,P07203,Q9BW19,O75340
1	217	3	GO:0007018	BP	microtubule-based movement	5	Q99661,Q15061,Q9BW19
1	106	1	GO:0010970	BP	microtubule-based transport	6	Q15061
1	63	1	GO:0072384	BP	organelle transport along microtubule	7	Q15061
1	37	1	GO:0047496	BP	vesicle transport along microtubule	8	Q15061
1	1320	15	GO:0048870	BP	cell motility	5	Q9NQW6,Q8IX12,P27695,Q14155,Q02218,P06576,P09038,O00622,P00533,P02545,P25815,Q9P258,Q9Y5S2,P07203,O75340
1	1211	15	GO:0016477	BP	cell migration	6	Q9NQW6,Q8IX12,P27695,Q14155,Q02218,P06576,P09038,O00622,P00533,P02545,P25815,Q9P258,Q9Y5S2,P07203,O75340
1	323	7	GO:0001667	BP	ameboidal-type cell migration	7	Q9NQW6,Q14155,P09038,P25815,Q9P258,P07203,O75340
1	39	3	GO:0010761	BP	fibroblast migration	8	Q14155,P09038,Q9P258
1	32	1	GO:0006929	BP	substrate-dependent cell migration	7	P06576
1	66	1	GO:0014812	BP	muscle cell migration	7	P27695
1	55	1	GO:0014909	BP	smooth muscle cell migration	8	P27695
1	164	4	GO:0007163	BP	establishment or maintenance of cell polarity	4	Q99661,P02545,Q15061,Q9Y5S2
1	106	1	GO:0030010	BP	establishment of cell polarity	5	Q15061
1	639	3	GO:0030029	BP	actin filament-based process	4	Q14126,P53367,Q9Y5S2
1	113	1	GO:0030048	BP	actin filament-based movement	5	Q14126
1	94	1	GO:0070252	BP	actin-mediated cell contraction	6	Q14126
0.00311	279	10	GO:0007059	BP	chromosome segregation	4	P49959,Q9NTI5,P49711,P23246,Q99661,Q7Z3K3,Q9BV86,Q9P258,P18754,Q9BW19
1	989	9	GO:0001775	BP	cell activation	4	Q96FV9,O00161,Q7KZ85,Q9NRZ9,O43852,P10809,Q14643,P17706,P08174
1	750	7	GO:0045321	BP	leukocyte activation	5	Q96FV9,O00161,Q7KZ85,Q9NRZ9,P10809,P17706,P08174
1	160	2	GO:0002274	BP	myeloid leukocyte activation	6	O00161,P10809
1	54	1	GO:0045576	BP	mast cell activation	7	O00161
1	54	1	GO:0042116	BP	macrophage activation	7	P10809
1	644	6	GO:0046649	BP	lymphocyte activation	6	Q96FV9,Q7KZ85,Q9NRZ9,P10809,P17706,P08174
1	242	4	GO:0042113	BP	B cell activation	7	Q96FV9,Q7KZ85,P10809,P17706
1	264	3	GO:0046651	BP	lymphocyte proliferation	7	Q9NRZ9,P10809,P08174
1	91	1	GO:0042100	BP	B cell proliferation	8	P10809
1	211	4	GO:0002263	BP	cell activation involved in immune response	5	Q96FV9,O00161,Q7KZ85,P10809
1	209	4	GO:0002366	BP	leukocyte activation involved in immune response	6	Q96FV9,O00161,Q7KZ85,P10809
1	67	1	GO:0002275	BP	myeloid cell activation involved in immune response	7	O00161
1	42	1	GO:0002279	BP	mast cell activation involved in immune response	8	O00161
1	149	3	GO:0002285	BP	lymphocyte activation involved in immune response	7	Q96FV9,Q7KZ85,P10809
1	59	3	GO:0002312	BP	B cell activation involved in immune response	8	Q96FV9,Q7KZ85,P10809
4.48e-24	1796	55	GO:0007049	BP	cell cycle	4	Q9NQW6,P51948,P49959,Q13642,Q8IX12,Q15054,Q13362,Q96FV9,Q9NTI5,Q9ULW0,Q9Y5N6,Q5SRE5,Q99459,O00541,P27695,P78406,Q8N1F7,P49711,P49005,Q9Y657,Q99567,O14519,P57740,P23246,Q9NRZ9,P35658,P51532,P61289,P51946,Q9UBD5,P40818,P09038,Q9Y6I4,Q00610,Q99661,Q92733,O43768,Q7Z3K3,P00533,Q9BV86,P46013,P49792,Q13112,P02545,Q15061,Q86U86,Q15004,Q8TAP9,O43660,Q9P258,P18754,P62805,O43663,Q9ULC4,Q9BW19
3.11e-22	1038	42	GO:0000278	BP	mitotic cell cycle	5	Q9NQW6,P51948,P49959,Q13642,Q15054,Q13362,Q9NTI5,Q9ULW0,Q9Y5N6,Q5SRE5,Q99459,P27695,P78406,Q8N1F7,P49005,Q99567,P57740,Q9NRZ9,P35658,P51532,P61289,P51946,Q9UBD5,P40818,Q9Y6I4,Q00610,Q99661,Q92733,O43768,Q7Z3K3,P00533,P49792,P02545,Q15061,Q86U86,Q8TAP9,O43660,Q9P258,P18754,P62805,O43663,Q9BW19
1	497	7	GO:0016049	BP	cell growth	4	Q13642,P17844,O43598,P51532,Q09161,O00622,P35232
5.05e-09	2026	38	GO:0008219	BP	cell death	4	O75223,P51948,P49959,Q14126,Q8IX12,Q13362,Q96FV9,Q9ULW0,Q13573,Q9UKV3,Q9HCK8,Q14155,P17844,P23246,O75940,Q9NRZ9,P61244,Q12931,P61289,Q9NWH9,P09038,O00622,P10809,O75915,P00533,Q14643,P52789,P55265,P02545,P30048,Q9BZZ5,P35232,P42765,Q86YP4,P17706,P07305,P07203,O75340
1.03e-09	1921	38	GO:0012501	BP	programmed cell death	5	O75223,P51948,P49959,Q14126,Q8IX12,Q13362,Q96FV9,Q9ULW0,Q13573,Q9UKV3,Q9HCK8,Q14155,P17844,P23246,O75940,Q9NRZ9,P61244,Q12931,P61289,Q9NWH9,P09038,O00622,P10809,O75915,P00533,Q14643,P52789,P55265,P02545,P30048,Q9BZZ5,P35232,P42765,Q86YP4,P17706,P07305,P07203,O75340
1.53e-08	1901	36	GO:0006915	BP	apoptotic process	6	O75223,P51948,P49959,Q14126,Q8IX12,Q13362,Q96FV9,Q9ULW0,Q13573,Q9UKV3,Q9HCK8,Q14155,P17844,P23246,O75940,Q9NRZ9,P61244,Q12931,P61289,Q9NWH9,O00622,P10809,O75915,P00533,Q14643,P52789,P55265,P02545,P30048,Q9BZZ5,P35232,P42765,P17706,P07305,P07203,O75340
1	461	5	GO:0097285	BP	cell-type specific apoptotic process	7	Q9HCK8,P61244,P10809,Q9BZZ5,P07203
1	19	2	GO:0044346	BP	fibroblast apoptotic process	8	Q9HCK8,Q9BZZ5
1	295	3	GO:0070997	BP	neuron death	5	P61244,P10809,P07203
1	226	3	GO:0051402	BP	neuron apoptotic process	6	P61244,P10809,P07203
5.27e-21	1319	45	GO:0022402	BP	cell cycle process	4	Q9NQW6,P51948,P49959,Q13642,Q15054,Q13362,Q96FV9,Q9NTI5,Q9ULW0,Q9Y5N6,Q5SRE5,Q99459,P27695,P78406,Q8N1F7,P49711,P49005,Q99567,P57740,P23246,Q9NRZ9,P35658,P51532,P61289,P51946,Q9UBD5,P40818,Q00610,Q99661,Q92733,O43768,Q7Z3K3,P00533,Q9BV86,P46013,P49792,P02545,Q15061,Q86U86,Q8TAP9,O43660,Q9P258,P18754,O43663,Q9BW19
0.0275	216	8	GO:0098813	BP	nuclear chromosome segregation	5	P49959,Q9NTI5,P49711,P23246,Q99661,Q7Z3K3,Q9P258,Q9BW19
1	43	2	GO:0051310	BP	metaphase plate congression	6	Q99661,Q9BW19
1	249	6	GO:0000075	BP	cell cycle checkpoint	5	P49959,Q13362,Q96FV9,Q99459,P61289,Q92733
1	166	5	GO:0031570	BP	DNA integrity checkpoint	6	P49959,Q13362,Q96FV9,Q99459,P61289
1.88e-06	507	17	GO:0044770	BP	cell cycle phase transition	5	Q9NQW6,P51948,P49959,Q13642,Q13362,Q9Y5N6,Q99459,P27695,P51532,P61289,P51946,Q9UBD5,O43768,P00533,O43660,Q9P258,P18754
0.946	197	6	GO:0044839	BP	cell cycle G2/M phase transition	6	P51948,P49959,Q13642,P51946,O43768,Q9P258
1.69e-05	259	12	GO:0044843	BP	cell cycle G1/S phase transition	6	P51948,Q13642,Q13362,Q9Y5N6,P27695,P51532,P61289,P51946,Q9UBD5,P00533,O43660,P18754
4.3e-20	865	37	GO:1903047	BP	mitotic cell cycle process	5	Q9NQW6,P51948,P49959,Q13642,Q13362,Q9NTI5,Q9ULW0,Q9Y5N6,Q5SRE5,P27695,P78406,Q8N1F7,Q99567,P57740,Q9NRZ9,P35658,P51532,P61289,P51946,Q9UBD5,P40818,Q00610,Q99661,Q92733,O43768,Q7Z3K3,P00533,P49792,P02545,Q15061,Q86U86,Q8TAP9,O43660,Q9P258,P18754,O43663,Q9BW19
7e-06	483	16	GO:0044772	BP	mitotic cell cycle phase transition	6	Q9NQW6,P51948,P49959,Q13642,Q13362,Q9Y5N6,P27695,P51532,P61289,P51946,Q9UBD5,O43768,P00533,O43660,Q9P258,P18754
1.14e-05	250	12	GO:0000082	BP	G1/S transition of mitotic cell cycle	7	P51948,Q13642,Q13362,Q9Y5N6,P27695,P51532,P61289,P51946,Q9UBD5,P00533,O43660,P18754
0.849	193	6	GO:0000086	BP	G2/M transition of mitotic cell cycle	7	P51948,P49959,Q13642,P51946,O43768,Q9P258
1	175	5	GO:0000910	BP	cytokinesis	5	Q9NQW6,P51946,P40818,P00533,O43663
1	40	2	GO:0061640	BP	cytoskeleton-dependent cytokinesis	6	Q9NQW6,P40818
1	31	2	GO:0000281	BP	mitotic cytokinesis	7	Q9NQW6,P40818
1	40	1	GO:0051653	BP	spindle localization	5	Q15061
0.0271	801	15	GO:0019725	BP	cellular homeostasis	4	Q15054,P55809,Q8IWX8,P27695,P49005,P06576,Q15651,P51532,P36543,P09038,Q14643,P49792,P52789,P08174,P07203
1	668	11	GO:0055082	BP	cellular chemical homeostasis	5	P55809,Q8IWX8,P06576,Q15651,P51532,P36543,P09038,Q14643,P49792,P52789,P08174
1	540	6	GO:0006873	BP	cellular ion homeostasis	6	Q8IWX8,P06576,P36543,P09038,Q14643,P08174
1	526	6	GO:0030003	BP	cellular cation homeostasis	7	Q8IWX8,P06576,P36543,P09038,Q14643,P08174
1	77	1	GO:0030004	BP	cellular monovalent inorganic cation homeostasis	8	P06576
1	55	1	GO:0030641	BP	regulation of cellular pH	9	P06576
1	52	1	GO:0051453	BP	regulation of intracellular pH	10	P06576
1	383	4	GO:0072503	BP	cellular divalent inorganic cation homeostasis	8	Q8IWX8,P09038,Q14643,P08174
1	487	5	GO:0006875	BP	cellular metal ion homeostasis	8	Q8IWX8,P36543,P09038,Q14643,P08174
1	108	1	GO:0046916	BP	cellular transition metal ion homeostasis	9	P36543
1	73	1	GO:0006879	BP	cellular iron ion homeostasis	10	P36543
1	363	4	GO:0006874	BP	cellular calcium ion homeostasis	9	Q8IWX8,P09038,Q14643,P08174
1	260	4	GO:0051480	BP	regulation of cytosolic calcium ion concentration	10	Q8IWX8,P09038,Q14643,P08174
1	239	4	GO:0007204	BP	positive regulation of cytosolic calcium ion concentration	11	Q8IWX8,P09038,Q14643,P08174
1	124	3	GO:0060402	BP	calcium ion transport into cytosol	12	Q8IWX8,P09038,Q14643
1	103	3	GO:1902656	BP	calcium ion import into cytosol	13	Q8IWX8,P09038,Q14643
1	21	1	GO:0032469	BP	endoplasmic reticulum calcium ion homeostasis	10	Q14643
1	105	3	GO:0051208	BP	sequestering of calcium ion	10	Q8IWX8,P09038,Q14643
1	135	5	GO:0001678	BP	cellular glucose homeostasis	6	P55809,Q15651,P51532,P49792,P52789
1	96	4	GO:0097194	BP	execution phase of apoptosis	4	Q14126,Q9UKV3,P02545,P07305
0.0648	1419	20	GO:0055085	BP	transmembrane transport	4	P31930,Q13642,Q00325,Q8IWX8,Q5SRE5,P78406,Q8N1F7,Q99567,P50416,P06576,P57740,P35658,P36543,P10606,P09038,Q14643,P25705,P49792,P52789,P61221
1	36	3	GO:0090662	BP	ATP hydrolysis coupled transmembrane transport	5	P06576,P36543,P25705
1	60	3	GO:1990542	BP	mitochondrial transmembrane transport	5	P50416,P06576,P25705
1	7	1	GO:0042045	BP	epithelial fluid transport	5	Q14643
1	1017	11	GO:0034220	BP	ion transmembrane transport	5	P31930,Q13642,Q00325,Q8IWX8,P50416,P06576,P36543,P10606,P09038,Q14643,P25705
1	739	11	GO:0098660	BP	inorganic ion transmembrane transport	6	P31930,Q13642,Q00325,Q8IWX8,P50416,P06576,P36543,P10606,P09038,Q14643,P25705
1	233	2	GO:0098656	BP	anion transmembrane transport	6	Q00325,P50416
1	106	1	GO:0098661	BP	inorganic anion transmembrane transport	7	Q00325
1	13	1	GO:0035435	BP	phosphate ion transmembrane transport	8	Q00325
1	723	10	GO:0098655	BP	cation transmembrane transport	6	P31930,Q13642,Q8IWX8,P50416,P06576,P36543,P10606,P09038,Q14643,P25705
1	657	10	GO:0098662	BP	inorganic cation transmembrane transport	7	P31930,Q13642,Q8IWX8,P50416,P06576,P36543,P10606,P09038,Q14643,P25705
1	25	1	GO:0072488	BP	ammonium transmembrane transport	8	P50416
0.561	115	5	GO:1902600	BP	hydrogen ion transmembrane transport	8	P31930,P06576,P36543,P10606,P25705
1	32	3	GO:0015988	BP	energy coupled proton transmembrane transport, against electrochemical gradient	9	P06576,P36543,P25705
1	32	3	GO:0015991	BP	ATP hydrolysis coupled proton transport	10	P06576,P36543,P25705
1	27	2	GO:0015985	BP	energy coupled proton transport, down electrochemical gradient	9	P06576,P25705
1	258	3	GO:0070588	BP	calcium ion transmembrane transport	8	Q8IWX8,P09038,Q14643
1	103	3	GO:0097553	BP	calcium ion transmembrane import into cytosol	9	Q8IWX8,P09038,Q14643
1	95	1	GO:1903825	BP	organic acid transmembrane transport	5	P50416
1	14	1	GO:1902001	BP	fatty acid transmembrane transport	6	P50416
1	12	1	GO:1902603	BP	carnitine transmembrane transport	6	P50416
1	9	1	GO:0006853	BP	carnitine shuttle	7	P50416
1	102	1	GO:0051651	BP	maintenance of location in cell	4	P52789
1	89	1	GO:0032507	BP	maintenance of protein location in cell	5	P52789
1	30	1	GO:0072595	BP	maintenance of protein localization in organelle	6	P52789
1	45	1	GO:0051220	BP	cytoplasmic sequestering of protein	6	P52789
1	5	1	GO:0072656	BP	maintenance of protein location in mitochondrion	7	P52789
1	963	11	GO:0032940	BP	secretion by cell	4	P55809,O00161,Q14155,P50416,Q15651,O43852,O43768,P00367,Q14643,P53367,Q13636
1	450	8	GO:0023061	BP	signal release	5	P55809,O00161,Q14155,P50416,Q15651,O43768,P00367,Q14643
0.516	329	8	GO:0046879	BP	hormone secretion	6	P55809,O00161,Q14155,P50416,Q15651,O43768,P00367,Q14643
0.911	273	7	GO:0030072	BP	peptide hormone secretion	7	P55809,Q14155,P50416,Q15651,O43768,P00367,Q14643
1	17	1	GO:0030252	BP	growth hormone secretion	8	Q14155
1	140	1	GO:0007269	BP	neurotransmitter secretion	6	O00161
1	371	3	GO:0006887	BP	exocytosis	5	O00161,O43852,Q13636
1	172	2	GO:0045055	BP	regulated exocytosis	6	O00161,Q13636
1	102	1	GO:0017156	BP	calcium ion regulated exocytosis	7	O00161
1	62	1	GO:0043299	BP	leukocyte degranulation	7	O00161
1	42	1	GO:0043303	BP	mast cell degranulation	8	O00161
1	87	1	GO:0002576	BP	platelet degranulation	6	O43852
1	495	7	GO:0009306	BP	protein secretion	5	P55809,P50416,Q15651,O43768,P00367,Q14643,P53367
1	229	6	GO:0030073	BP	insulin secretion	6	P55809,P50416,Q15651,O43768,P00367,Q14643
1	87	1	GO:0006903	BP	vesicle targeting	4	O00161
1	180	1	GO:0071804	BP	cellular potassium ion transport	4	Q13642
1	180	1	GO:0071805	BP	potassium ion transmembrane transport	5	Q13642
1	240	5	GO:0006457	BP	protein folding	3	P08621,Q12931,P10809,P49792,P30533
1	57	1	GO:0006458	BP	'de novo' protein folding	4	P10809
1	53	1	GO:0051084	BP	'de novo' posttranslational protein folding	5	P10809
1	22	2	GO:0042026	BP	protein refolding	4	P08621,P10809
1	51	2	GO:0061077	BP	chaperone-mediated protein folding	4	Q12931,P10809
1	10	1	GO:0051085	BP	chaperone mediated protein folding requiring cofactor	5	P10809
3.27e-18	7207	98	GO:0051716	BP	cellular response to stimulus	3	O75223,Q9UIG0,P51948,P49959,P26368,Q15054,Q13362,Q96FV9,P55809,Q9Y2W2,Q9NW64,Q9BXP5,P30086,P35637,Q5SRE5,Q99459,P61218,Q92841,Q13573,Q9UKV3,P27695,Q9HCK8,P78406,Q14155,O00505,Q8N1F7,P49005,Q9Y657,Q99567,P17844,P50416,P57740,P53999,P23246,O15446,Q15651,Q9NRZ9,P54278,P22626,Q15014,P61244,Q12931,P35658,P51532,O43852,P36543,P61289,Q9H0C8,P21266,P51946,Q9C0J8,P17096,Q9NZM1,P40818,P09038,Q9Y6I4,Q8IZL8,…
1	183	2	GO:0071216	BP	cellular response to biotic stimulus	4	P08174,Q6PD62
4.11e-14	2852	54	GO:0070887	BP	cellular response to chemical stimulus	4	O75223,P55809,Q9NW64,Q9BXP5,P30086,P35637,Q5SRE5,Q99459,Q13573,P27695,P78406,Q14155,O00505,Q8N1F7,Q99567,P50416,P57740,P23246,Q15651,P22626,P61244,Q12931,P35658,P51532,P36543,P61289,P21266,Q9NZM1,P09038,Q8IZL8,O00622,O75915,P00533,P38159,Q14643,Q00839,P49792,Q6YHK3,P55265,P02545,P30048,P35232,P42765,Q13636,Q8NEM2,P17706,P52292,P08047,O00629,P08174,P36776,Q6PD62,P07203,O75340
1	184	3	GO:0071229	BP	cellular response to acid chemical	5	Q13573,P50416,P00533
0.179	735	13	GO:1901699	BP	cellular response to nitrogen compound	5	Q9BXP5,P30086,Q99459,P27695,P22626,P61244,P36543,P61289,P09038,P00533,P55265,Q13636,P17706
0.00161	1102	20	GO:1901701	BP	cellular response to oxygen-containing compound	5	P55809,P30086,Q99459,Q13573,P27695,P50416,Q15651,P61244,Q12931,P51532,P36543,P61289,P09038,P00533,Q00839,P30048,Q13636,P17706,P08174,Q6PD62
1	74	2	GO:1901655	BP	cellular response to ketone	6	Q99459,Q00839
1	72	1	GO:0035690	BP	cellular response to drug	5	Q9NW64
1	196	2	GO:0071466	BP	cellular response to xenobiotic stimulus	5	O75223,P21266
3.41e-10	2347	43	GO:0071310	BP	cellular response to organic substance	5	P55809,Q9BXP5,P30086,Q5SRE5,Q99459,Q13573,P27695,P78406,Q14155,O00505,Q8N1F7,Q99567,P50416,P57740,Q15651,P22626,P61244,P35658,P51532,P36543,P61289,Q9NZM1,P09038,Q8IZL8,O00622,P00533,P38159,Q14643,Q00839,P49792,Q6YHK3,P55265,P02545,P35232,Q13636,Q8NEM2,P17706,P52292,P08047,O00629,P08174,Q6PD62,O75340
1	126	3	GO:0097306	BP	cellular response to alcohol	6	Q13573,P00533,Q00839
0.000657	760	17	GO:0071345	BP	cellular response to cytokine stimulus	6	Q5SRE5,Q99459,P78406,O00505,Q8N1F7,Q99567,P57740,P35658,P61289,P38159,P49792,P55265,P35232,P17706,P52292,O00629,Q6PD62
1	10	1	GO:0036006	BP	cellular response to macrophage colony-stimulating factor stimulus	7	P17706
1	27	1	GO:0071353	BP	cellular response to interleukin-4	7	P17706
0.721	6	2	GO:0071352	BP	cellular response to interleukin-2	7	Q99459,P17706
1	90	1	GO:0071347	BP	cellular response to interleukin-1	7	P38159
1	262	2	GO:0071356	BP	cellular response to tumor necrosis factor	7	P61289,P17706
0.714	28	3	GO:0071354	BP	cellular response to interleukin-6	7	P35232,P17706,Q6PD62
1	136	1	GO:0071346	BP	cellular response to interferon-gamma	7	P17706
1	82	2	GO:0071357	BP	cellular response to type I interferon	7	P55265,P17706
0.497	927	14	GO:0071363	BP	cellular response to growth factor stimulus	6	P30086,Q99459,Q13573,Q14155,P61289,Q9NZM1,P09038,O00622,P00533,Q14643,Q6YHK3,Q8NEM2,P08047,O75340
1	156	1	GO:0071773	BP	cellular response to BMP stimulus	7	O00622
1	246	3	GO:0071560	BP	cellular response to transforming growth factor beta stimulus	7	Q13573,Q6YHK3,P08047
1	37	1	GO:1990090	BP	cellular response to nerve growth factor stimulus	7	Q99459
1	340	7	GO:0044344	BP	cellular response to fibroblast growth factor stimulus	7	P30086,Q99459,P61289,P09038,P00533,Q14643,Q8NEM2
1	26	1	GO:0071364	BP	cellular response to epidermal growth factor stimulus	7	P00533
1	434	7	GO:0071396	BP	cellular response to lipid	6	Q13573,P50416,Q8IZL8,P00533,Q00839,P08174,Q6PD62
1	70	1	GO:0071300	BP	cellular response to retinoic acid	7	Q13573
1	52	1	GO:0071398	BP	cellular response to fatty acid	7	P50416
0.118	425	10	GO:0071407	BP	cellular response to organic cyclic compound	6	Q9BXP5,Q99459,Q13573,P27695,P78406,P22626,Q8IZL8,P00533,Q00839,P55265
1	42	3	GO:0071359	BP	cellular response to dsRNA	7	Q9BXP5,P22626,P55265
1	1	1	GO:1904568	BP	cellular response to wortmannin	7	Q99459
1	134	3	GO:0071322	BP	cellular response to carbohydrate stimulus	6	P55809,Q15651,P51532
1	124	3	GO:0071326	BP	cellular response to monosaccharide stimulus	7	P55809,Q15651,P51532
1	122	3	GO:0071331	BP	cellular response to hexose stimulus	8	P55809,Q15651,P51532
1	120	3	GO:0071333	BP	cellular response to glucose stimulus	9	P55809,Q15651,P51532
1	60	2	GO:0035773	BP	insulin secretion involved in cellular response to glucose stimulus	10	P55809,Q15651
0.764	744	12	GO:0032870	BP	cellular response to hormone stimulus	6	P30086,Q99459,P27695,P61244,P36543,P61289,P09038,Q8IZL8,P00533,Q00839,Q13636,P17706
1	168	3	GO:0071383	BP	cellular response to steroid hormone stimulus	7	Q8IZL8,P00533,Q00839
1	63	1	GO:0071384	BP	cellular response to corticosteroid stimulus	8	Q00839
1	59	1	GO:0071385	BP	cellular response to glucocorticoid stimulus	9	Q00839
1	28	1	GO:0071549	BP	cellular response to dexamethasone stimulus	10	Q00839
1	42	2	GO:0071391	BP	cellular response to estrogen stimulus	8	Q8IZL8,P00533
1	31	1	GO:0071392	BP	cellular response to estradiol stimulus	9	P00533
1	680	10	GO:0071417	BP	cellular response to organonitrogen compound	6	P30086,Q99459,P27695,P61244,P36543,P61289,P09038,P00533,Q13636,P17706
0.678	528	10	GO:1901653	BP	cellular response to peptide	7	P30086,Q99459,P27695,P61244,P36543,P61289,P09038,P00533,Q13636,P17706
0.516	510	10	GO:0071375	BP	cellular response to peptide hormone stimulus	8	P30086,Q99459,P27695,P61244,P36543,P61289,P09038,P00533,Q13636,P17706
1	1	1	GO:1990646	BP	cellular response to prolactin	9	Q99459
1	410	7	GO:0032869	BP	cellular response to insulin stimulus	9	P30086,P36543,P61289,P09038,P00533,Q13636,P17706
1	55	1	GO:0071230	BP	cellular response to amino acid stimulus	7	P00533
1	49	1	GO:0071320	BP	cellular response to cAMP	7	P27695
1	162	1	GO:0071241	BP	cellular response to inorganic substance	5	P35637
1	140	1	GO:0071248	BP	cellular response to metal ion	6	P35637
1	50	1	GO:0071277	BP	cellular response to calcium ion	7	P35637
1	156	2	GO:0071453	BP	cellular response to oxygen levels	5	P02545,P42765
1	147	2	GO:0036294	BP	cellular response to decreased oxygen levels	6	P02545,P42765
1	236	1	GO:0060326	BP	cell chemotaxis	5	P09038
1	7	1	GO:0035766	BP	cell chemotaxis to fibroblast growth factor	6	P09038
3.66e-22	1968	55	GO:0033554	BP	cellular response to stress	4	Q9UIG0,P51948,P49959,P26368,Q15054,Q13362,Q96FV9,Q9Y2W2,Q5SRE5,Q99459,P61218,Q13573,Q9UKV3,P27695,P78406,Q8N1F7,P49005,Q99567,P17844,P57740,P23246,P54278,Q15014,P61244,Q12931,P35658,O43852,P61289,P21266,P51946,Q9C0J8,P17096,Q9NZM1,Q9Y6I4,O75915,P00533,P46013,Q14643,P49792,Q13112,P52789,Q01081,P02545,P30048,Q15004,P42765,P17706,P52292,Q13330,P36776,P62805,P05114,Q9ULC4,P07203,O75340
1	138	4	GO:0098780	BP	response to mitochondrial depolarisation	5	Q9UKV3,Q8N1F7,Q13112,P52789
1	10	1	GO:0071501	BP	cellular response to sterol depletion	5	P02545
1	259	3	GO:0034976	BP	response to endoplasmic reticulum stress	5	Q14643,P02545,P17706
2.81e-12	811	28	GO:0006974	BP	cellular response to DNA damage stimulus	5	Q9UIG0,P51948,P49959,Q15054,Q13362,Q96FV9,Q99459,P61218,Q13573,P27695,P49005,P17844,P23246,P54278,Q15014,P61289,P51946,Q9C0J8,P17096,Q9Y6I4,P00533,Q13112,Q15004,P52292,Q13330,P62805,P05114,Q9ULC4
1	36	2	GO:0042769	BP	DNA damage response, detection of DNA damage	6	Q15054,P49005
1	156	5	GO:0000077	BP	DNA damage checkpoint	6	P49959,Q13362,Q96FV9,Q99459,P61289
1	35	1	GO:0031572	BP	G2 DNA damage checkpoint	7	P49959
1	78	2	GO:0044783	BP	G1 DNA damage checkpoint	7	Q13362,P61289
0.315	229	7	GO:0034599	BP	cellular response to oxidative stress	5	P27695,P23246,Q12931,O75915,P30048,P36776,P07203
0.554	63	4	GO:0036473	BP	cell death in response to oxidative stress	6	P23246,Q12931,O75915,P07203
1	133	3	GO:0034614	BP	cellular response to reactive oxygen species	6	P27695,Q12931,P30048
1	10	1	GO:0097468	BP	programmed cell death in response to reactive oxygen species	7	Q12931
1	77	2	GO:0070301	BP	cellular response to hydrogen peroxide	7	P27695,Q12931
1	21	1	GO:0036474	BP	cell death in response to hydrogen peroxide	8	Q12931
1	10	1	GO:0010421	BP	hydrogen peroxide-mediated programmed cell death	9	Q12931
5.93e-07	113	10	GO:0034605	BP	cellular response to heat	5	Q5SRE5,P78406,Q8N1F7,Q99567,P57740,P35658,Q9NZM1,P46013,P49792,O75340
1	141	2	GO:0035967	BP	cellular response to topologically incorrect protein	5	P02545,P17706
1	132	2	GO:0034620	BP	cellular response to unfolded protein	6	P02545,P17706
1	140	2	GO:0071456	BP	cellular response to hypoxia	5	P02545,P42765
1	207	2	GO:0031668	BP	cellular response to extracellular stimulus	4	Q13573,P61244
1	177	2	GO:0031669	BP	cellular response to nutrient levels	5	Q13573,P61244
1	46	1	GO:0031670	BP	cellular response to nutrient	6	Q13573
1	33	1	GO:0071295	BP	cellular response to vitamin	7	Q13573
1	21	1	GO:0071305	BP	cellular response to vitamin D	8	Q13573
1	123	1	GO:0009267	BP	cellular response to starvation	6	P61244
2.59e-56	6199	141	GO:0016043	BP	cellular component organization	3	O75223,Q9NQ29,Q9UIG0,Q9NQW6,P51948,P49959,Q13642,Q14126,P26368,P04181,O43709,Q969G3,O75530,Q15054,Q9NTI5,Q96MU7,Q9Y2W2,Q9NW64,Q9ULW0,P30086,O00161,Q5SRE5,O00541,Q13573,Q9UKV3,P27695,Q9HCK8,P78406,Q9NV56,Q14155,O00505,Q8N1F7,P49711,O75822,Q16698,P49005,Q9Y657,Q99567,O95232,Q7KZ85,P50416,P06576,P57740,Q16630,O43598,Q8TDN6,P52298,P23246,Q6PI48,P07339,Q15651,Q9NRZ9,P13674,Q9P032,Q15014,O95573,P61244,…
1.64e-39	2636	83	GO:0043933	BP	macromolecular complex subunit organization	4	Q9NQ29,Q9UIG0,Q9NQW6,P51948,P26368,P04181,O43709,Q969G3,O75530,Q96MU7,Q9NW64,Q9ULW0,O00161,Q13573,Q9HCK8,Q9NV56,O00505,Q8N1F7,P49711,O75822,Q16698,Q9Y657,O95232,Q7KZ85,P50416,P57740,Q16630,Q8TDN6,P52298,P23246,Q15651,Q9NRZ9,P13674,Q9P032,Q15014,O95573,P61244,P51532,Q16718,Q8IWC1,Q09161,Q9GZS1,P17096,Q99590,Q8TAQ2,Q9Y6I4,Q99661,Q7Z3K3,Q8WXI9,P10809,Q9Y383,P38159,Q9BV86,Q8N684,Q9NR56,Q96SI1,Q13112,…
2.7e-06	220	12	GO:0071824	BP	protein-DNA complex subunit organization	5	Q969G3,P49711,Q9NRZ9,P51532,Q9GZS1,P17096,Q8TAQ2,Q7Z3K3,Q13112,P13984,P07305,P62805
1	39	1	GO:0071825	BP	protein-lipid complex subunit organization	5	O95573
2.04e-16	213	20	GO:0071826	BP	ribonucleoprotein complex subunit organization	5	Q9NQ29,P26368,Q96MU7,Q9NW64,O75822,O95232,Q8TDN6,P52298,Q09161,Q99590,Q9Y383,Q9NR56,P55265,Q9H814,O75475,Q2NL82,O95400,Q9BTL3,Q9BUQ8,Q9ULC4
1.11e-10	1879	39	GO:0071822	BP	protein complex subunit organization	5	Q9NQW6,P51948,P04181,Q969G3,Q9ULW0,O00161,O00505,Q8N1F7,P49711,Q16698,P50416,P57740,Q16630,P13674,Q9P032,P61244,P51532,Q16718,Q8IWC1,P17096,Q8TAQ2,Q99661,Q7Z3K3,P10809,P38159,Q9BV86,Q8N684,Q96SI1,Q13112,P53367,P18754,P34897,P13984,P07305,P36776,P62805,O43663,Q9BW19,Q9Y697
1	265	3	GO:0034330	BP	cell junction organization	4	Q14126,Q14155,Q9P258
1	232	3	GO:0045216	BP	cell-cell junction organization	5	Q14126,Q14155,Q9P258
1	9	1	GO:0002934	BP	desmosome organization	6	Q14126
1	121	2	GO:0034332	BP	adherens junction organization	6	Q14155,Q9P258
2.12e-08	773	23	GO:0022411	BP	cellular component disassembly	4	Q14126,P26368,Q969G3,Q9Y2W2,Q5SRE5,Q9UKV3,P78406,Q8N1F7,Q99567,P57740,P07339,P35658,P51532,P17096,Q8TAQ2,Q99661,P49792,Q13112,P52789,Q01081,P02545,P07305,Q9ULC4
1	320	6	GO:0032984	BP	macromolecular complex disassembly	5	Q969G3,P51532,P17096,Q8TAQ2,Q99661,Q9ULC4
1	11	1	GO:0032988	BP	ribonucleoprotein complex disassembly	6	Q9ULC4
0.00264	17	4	GO:0032986	BP	protein-DNA complex disassembly	6	Q969G3,P51532,P17096,Q8TAQ2
1	309	5	GO:0043241	BP	protein complex disassembly	6	Q969G3,P51532,P17096,Q8TAQ2,Q99661
1	285	1	GO:0043624	BP	cellular protein complex disassembly	7	Q99661
1	101	1	GO:0051261	BP	protein depolymerization	8	Q99661
0.785	69	4	GO:0006921	BP	cellular component disassembly involved in execution phase of apoptosis	5	Q14126,Q9UKV3,P02545,P07305
1	30	2	GO:0030262	BP	apoptotic nuclear changes	6	Q9UKV3,P07305
0.00149	546	14	GO:0010256	BP	endomembrane system organization	4	Q5SRE5,P78406,Q14155,Q8N1F7,Q99567,P57740,O95573,P35658,Q9NZM1,P40818,Q00610,P49792,P02545,Q13636
0.000571	1129	21	GO:0061024	BP	membrane organization	4	O00161,Q5SRE5,P78406,Q8N1F7,Q99567,P57740,O95573,P35658,Q9NZM1,Q00610,P49458,P00533,P49792,P52789,P02545,P04843,P42765,Q13636,P09543,P08174,P31150
8.6e-05	915	20	GO:0044802	BP	single-organism membrane organization	5	O00161,Q5SRE5,P78406,Q8N1F7,Q99567,P57740,O95573,P35658,Q9NZM1,Q00610,P49458,P00533,P49792,P52789,P02545,P04843,P42765,Q13636,P09543,P31150
1.44e-07	46	8	GO:0030397	BP	membrane disassembly	6	Q5SRE5,P78406,Q8N1F7,Q99567,P57740,P35658,P49792,P02545
1	274	4	GO:0007009	BP	plasma membrane organization	6	O95573,Q9NZM1,Q00610,Q13636
1	7	1	GO:0001778	BP	plasma membrane repair	7	Q9NZM1
1	497	7	GO:0072657	BP	protein localization to membrane	6	O95573,Q00610,P49458,P00533,P04843,Q13636,P31150
1	372	6	GO:0090150	BP	establishment of protein localization to membrane	7	O95573,P49458,P00533,P04843,Q13636,P31150
1	211	3	GO:0072659	BP	protein localization to plasma membrane	7	O95573,Q00610,Q13636
1	140	2	GO:0090002	BP	establishment of protein localization to plasma membrane	8	O95573,Q13636
1	35	2	GO:0043001	BP	Golgi to plasma membrane protein transport	8	O95573,Q13636
1	200	3	GO:0006612	BP	protein targeting to membrane	7	P49458,P04843,P31150
1	113	2	GO:0006613	BP	cotranslational protein targeting to membrane	8	P49458,P04843
1	110	2	GO:0006614	BP	SRP-dependent cotranslational protein targeting to membrane	9	P49458,P04843
1	45	1	GO:0051205	BP	protein insertion into membrane	6	P00533
1	170	1	GO:0061025	BP	membrane fusion	5	O00161
1	142	1	GO:0044801	BP	single-organism membrane fusion	6	O00161
1	31	1	GO:0045026	BP	plasma membrane fusion	7	O00161
6.48e-37	3711	93	GO:0006996	BP	organelle organization	4	O75223,Q9UIG0,Q9NQW6,P49959,P26368,O43709,Q969G3,O75530,Q15054,Q9NTI5,Q9Y2W2,Q9ULW0,O00161,Q5SRE5,O00541,Q13573,Q9UKV3,P27695,Q9HCK8,P78406,Q9NV56,Q14155,Q8N1F7,P49711,P49005,Q9Y657,Q99567,Q7KZ85,P06576,P57740,Q8TDN6,P23246,Q6PI48,Q15651,Q9NRZ9,Q9P032,Q15014,P35658,O60220,P51532,Q16718,Q8IWC1,Q9NVN8,O60832,P09651,P17096,P40818,Q8TAQ2,Q9Y6I4,Q00610,Q99661,O43768,Q7Z3K3,Q8WXI9,Q9BV86,P46013,Q00839,…
2.59e-06	589	18	GO:0048285	BP	organelle fission	5	Q9NQW6,P49959,Q9NTI5,Q9ULW0,Q99567,Q9NRZ9,P35658,P51532,Q00610,Q99661,O43768,Q7Z3K3,P46013,Q86U86,Q8TAP9,Q9P258,P18754,Q9BW19
8.78e-07	550	18	GO:0000280	BP	nuclear division	6	Q9NQW6,P49959,Q9NTI5,Q9ULW0,Q99567,Q9NRZ9,P35658,P51532,Q00610,Q99661,O43768,Q7Z3K3,P46013,Q86U86,Q8TAP9,Q9P258,P18754,Q9BW19
1.21e-23	2656	65	GO:1902589	BP	single-organism organelle organization	5	Q9UIG0,Q9NQW6,P49959,P26368,Q969G3,O75530,Q15054,Q9NTI5,Q9Y2W2,Q9ULW0,O00161,Q13573,Q9UKV3,P27695,Q9NV56,Q8N1F7,P49711,P49005,Q99567,Q7KZ85,P23246,Q6PI48,Q9NRZ9,Q15014,P35658,P51532,Q8IWC1,Q9NVN8,O60832,P09651,P17096,Q8TAQ2,Q9Y6I4,Q00610,Q99661,O43768,Q7Z3K3,Q9BV86,P46013,Q00839,Q13112,P52789,Q01081,P02545,Q15061,Q86U86,P53367,Q15004,P35232,P42765,Q8TAP9,P09543,Q7L0Y3,Q9H2U1,Q9P258,P18754,Q9H3P2,…
0.0534	237	8	GO:1903008	BP	organelle disassembly	6	P26368,Q9Y2W2,Q9UKV3,Q8N1F7,Q13112,P52789,Q01081,Q9ULC4
0.239	219	7	GO:0061726	BP	mitochondrion disassembly	7	P26368,Q9Y2W2,Q9UKV3,Q8N1F7,Q13112,P52789,Q01081
1	8	1	GO:0032790	BP	ribosome disassembly	7	Q9ULC4
1.21e-06	427	16	GO:0007067	BP	mitotic nuclear division	6	Q9NQW6,Q9NTI5,Q9ULW0,Q99567,Q9NRZ9,P35658,P51532,Q00610,Q99661,O43768,Q7Z3K3,Q86U86,Q8TAP9,Q9P258,P18754,Q9BW19
1	24	1	GO:0010458	BP	exit from mitosis	7	Q9NQW6
8.4e-24	1126	45	GO:0051276	BP	chromosome organization	5	Q9UIG0,P49959,O43709,Q969G3,O75530,Q15054,Q9NTI5,Q13573,Q9UKV3,P27695,Q9HCK8,Q9NV56,P49711,P49005,Q9Y657,Q7KZ85,P57740,P23246,Q15651,Q9NRZ9,Q15014,P51532,Q9NVN8,O60832,P09651,P17096,Q8TAQ2,Q9Y6I4,Q99661,Q7Z3K3,Q8WXI9,Q00839,Q13112,Q86U86,P35232,Q9H2U1,Q13330,Q9H3P2,P07305,P62805,O75717,Q86U70,Q6PD62,P05114,Q9BW19
0.0151	263	9	GO:0071103	BP	DNA conformation change	6	P49959,Q9UKV3,Q9HCK8,P49711,Q9NRZ9,P17096,Q13112,P07305,P62805
0.136	200	7	GO:0006323	BP	DNA packaging	7	Q9UKV3,P49711,Q9NRZ9,P17096,Q13112,P07305,P62805
1	31	1	GO:0030261	BP	chromosome condensation	8	Q9UKV3
1	5	1	GO:0030263	BP	apoptotic chromosome condensation	9	Q9UKV3
1	63	3	GO:0032392	BP	DNA geometric change	7	P49959,Q9HCK8,P17096
1	58	3	GO:0032508	BP	DNA duplex unwinding	8	P49959,Q9HCK8,P17096
6.85e-06	145	10	GO:0032200	BP	telomere organization	6	P49959,Q15054,P27695,P49005,Q9NVN8,O60832,P09651,Q00839,Q9H2U1,P62805
0.146	3	2	GO:0000972	BP	transcription-dependent tethering of RNA polymerase II gene DNA at nuclear periphery	6	P57740,Q86U70
1	2	1	GO:0000973	BP	posttranscriptional tethering of RNA polymerase II gene DNA at nuclear periphery	7	P57740
9.26e-15	768	30	GO:0006325	BP	chromatin organization	6	Q9UIG0,O43709,Q969G3,O75530,Q13573,Q9HCK8,Q9NV56,P49711,Q9Y657,Q7KZ85,P23246,Q15651,Q9NRZ9,Q15014,P51532,P17096,Q8TAQ2,Q9Y6I4,Q8WXI9,Q13112,Q86U86,P35232,Q13330,Q9H3P2,P07305,P62805,O75717,Q86U70,Q6PD62,P05114
1	42	1	GO:0061641	BP	CENP-A containing chromatin organization	7	P62805
0.0835	14	3	GO:0070828	BP	heterochromatin organization	7	Q9NRZ9,P17096,O75717
7.81e-05	187	10	GO:0006333	BP	chromatin assembly or disassembly	7	Q9UIG0,Q969G3,P49711,Q9NRZ9,P51532,P17096,Q8TAQ2,Q13112,P07305,P62805
0.00427	19	4	GO:0031498	BP	chromatin disassembly	8	Q969G3,P51532,P17096,Q8TAQ2
2.4e-12	614	25	GO:0016568	BP	chromatin modification	7	Q9UIG0,O43709,Q969G3,O75530,Q13573,Q9HCK8,Q9NV56,P49711,Q9Y657,Q7KZ85,P23246,Q15651,Q9NRZ9,Q15014,P51532,P17096,Q8TAQ2,Q9Y6I4,Q8WXI9,Q86U86,P35232,Q9H3P2,P62805,Q86U70,Q6PD62
1.58e-05	442	15	GO:0016569	BP	covalent chromatin modification	8	Q9UIG0,O75530,Q13573,Q9NV56,P49711,Q7KZ85,P23246,Q9NRZ9,Q15014,Q9Y6I4,P35232,Q9H3P2,P62805,Q86U70,Q6PD62
3.74e-08	152	12	GO:0006338	BP	chromatin remodeling	8	Q9UIG0,Q969G3,Q9HCK8,Q7KZ85,Q9NRZ9,Q15014,P51532,P17096,Q8TAQ2,Q8WXI9,Q86U86,P62805
1	44	2	GO:0031055	BP	chromatin remodeling at centromere	9	Q9NRZ9,P62805
0.00419	75	6	GO:0043044	BP	ATP-dependent chromatin remodeling	9	Q969G3,Q9HCK8,P51532,Q8TAQ2,Q8WXI9,P62805
0.00496	171	8	GO:0034728	BP	nucleosome organization	7	Q969G3,P49711,P51532,P17096,Q8TAQ2,Q13112,P07305,P62805
1	32	2	GO:0034723	BP	DNA replication-dependent nucleosome organization	8	Q13112,P62805
1	53	1	GO:0034724	BP	DNA replication-independent nucleosome organization	8	P62805
1	54	1	GO:0043486	BP	histone exchange	8	P62805
0.00264	17	4	GO:0006337	BP	nucleosome disassembly	8	Q969G3,P51532,P17096,Q8TAQ2
1	14	1	GO:0051383	BP	kinetochore organization	6	Q7Z3K3
0.0246	153	7	GO:0000819	BP	sister chromatid segregation	6	P49959,Q9NTI5,P49711,P23246,Q99661,Q7Z3K3,Q9BW19
1	129	4	GO:0000070	BP	mitotic sister chromatid segregation	7	Q9NTI5,Q99661,Q7Z3K3,Q9BW19
1	33	2	GO:0007080	BP	mitotic metaphase plate congression	8	Q99661,Q9BW19
0.0047	43	5	GO:0007062	BP	sister chromatid cohesion	6	P49959,Q9NTI5,P49711,P23246,Q7Z3K3
1	7	1	GO:0070601	BP	centromeric sister chromatid cohesion	7	P49711
1	17	2	GO:0007064	BP	mitotic sister chromatid cohesion	7	Q9NTI5,Q7Z3K3
0.255	1091	16	GO:0007010	BP	cytoskeleton organization	5	Q9NQW6,Q9ULW0,Q8IWC1,Q99661,Q9BV86,P02545,Q71RC2,Q15061,P53367,Q15004,P09543,Q9P258,P18754,Q9Y5S2,O43663,Q9BW19
0.721	6	2	GO:0030952	BP	establishment or maintenance of cytoskeleton polarity	6	Q99661,P02545
1	2	1	GO:0032185	BP	septin cytoskeleton organization	6	Q9NQW6
1	1	1	GO:0031106	BP	septin ring organization	7	Q9NQW6
1	556	2	GO:0030036	BP	actin cytoskeleton organization	6	P53367,Q9Y5S2
1	84	1	GO:0031532	BP	actin cytoskeleton reorganization	7	Q9Y5S2
1	150	1	GO:0031032	BP	actomyosin structure organization	7	Q9Y5S2
1	328	1	GO:0007015	BP	actin filament organization	7	P53367
1	189	1	GO:0008154	BP	actin polymerization or depolymerization	8	P53367
0.00428	434	12	GO:0000226	BP	microtubule cytoskeleton organization	6	Q9ULW0,Q8IWC1,Q99661,Q9BV86,P02545,Q15061,Q15004,P09543,Q9P258,P18754,O43663,Q9BW19
1	52	2	GO:1902850	BP	microtubule cytoskeleton organization involved in mitosis	7	Q9ULW0,Q9BW19
1	89	2	GO:0031109	BP	microtubule polymerization or depolymerization	7	Q8IWC1,Q99661
1	40	1	GO:0007019	BP	microtubule depolymerization	8	Q99661
1	43	1	GO:0034453	BP	microtubule anchoring	7	Q9P258
1	26	1	GO:0008608	BP	attachment of spindle microtubules to kinetochore	8	Q9P258
0.146	3	2	GO:0030951	BP	establishment or maintenance of microtubule cytoskeleton polarity	7	Q99661,P02545
1	133	5	GO:0007051	BP	spindle organization	7	Q9ULW0,Q9BV86,P18754,O43663,Q9BW19
1	10	1	GO:0051231	BP	spindle elongation	8	O43663
1	81	4	GO:0007052	BP	mitotic spindle organization	8	Q9ULW0,P18754,O43663,Q9BW19
1	9	1	GO:0000022	BP	mitotic spindle elongation	9	O43663
1	36	1	GO:0051293	BP	establishment of spindle localization	7	Q15061
1	26	1	GO:0040001	BP	establishment of mitotic spindle localization	8	Q15061
1	28	1	GO:0051294	BP	establishment of spindle orientation	8	Q15061
1	22	1	GO:0000132	BP	establishment of mitotic spindle orientation	9	Q15061
4.35e-05	131	9	GO:0006997	BP	nucleus organization	5	Q5SRE5,O00541,P78406,Q8N1F7,Q99567,P57740,P35658,P49792,P02545
1	5	1	GO:0007000	BP	nucleolus organization	6	O00541
1	13	2	GO:0006999	BP	nuclear pore organization	6	Q8N1F7,P57740
9.13e-06	76	8	GO:0006998	BP	nuclear envelope organization	6	Q5SRE5,P78406,Q8N1F7,Q99567,P57740,P35658,P49792,P02545
1	13	1	GO:0031468	BP	nuclear envelope reassembly	7	P02545
1	10	1	GO:0007084	BP	mitotic nuclear envelope reassembly	8	P02545
1.44e-07	46	8	GO:0051081	BP	nuclear envelope disassembly	7	Q5SRE5,P78406,Q8N1F7,Q99567,P57740,P35658,P49792,P02545
9.84e-08	44	8	GO:0007077	BP	mitotic nuclear envelope disassembly	8	Q5SRE5,P78406,Q8N1F7,Q99567,P57740,P35658,P49792,P02545
1.15e-07	765	22	GO:0007005	BP	mitochondrion organization	5	O75223,P26368,Q9Y2W2,Q9UKV3,Q8N1F7,P06576,Q6PI48,Q9P032,O60220,Q16718,Q13112,P52789,Q01081,P02545,P30048,Q10713,P35232,P42765,P09543,Q7L0Y3,P36776,P07203
1	30	1	GO:0000002	BP	mitochondrial genome maintenance	6	P36776
1	97	3	GO:0007006	BP	mitochondrial membrane organization	6	P52789,P42765,P09543
1	65	3	GO:0046902	BP	regulation of mitochondrial membrane permeability	7	P52789,P42765,P09543
0.146	3	2	GO:0035795	BP	negative regulation of mitochondrial membrane permeability	8	P52789,P42765
1	53	1	GO:0035794	BP	positive regulation of mitochondrial membrane permeability	8	P42765
1	51	1	GO:1902686	BP	mitochondrial outer membrane permeabilization involved in programmed cell death	9	P42765
0.657	119	5	GO:0008637	BP	apoptotic mitochondrial changes	6	O75223,P52789,P02545,P42765,P07203
1	56	1	GO:1902108	BP	regulation of mitochondrial membrane permeability involved in apoptotic process	7	P42765
1	2	1	GO:1902109	BP	negative regulation of mitochondrial membrane permeability involved in apoptotic process	8	P42765
1	51	1	GO:1902110	BP	positive regulation of mitochondrial membrane permeability involved in apoptotic process	8	P42765
0.239	219	7	GO:0000422	BP	mitophagy	6	P26368,Q9Y2W2,Q9UKV3,Q8N1F7,Q13112,P52789,Q01081
1	158	4	GO:0000423	BP	macromitophagy	7	Q9UKV3,Q8N1F7,Q13112,P52789
1	138	4	GO:0098779	BP	mitophagy in response to mitochondrial depolarization	8	Q9UKV3,Q8N1F7,Q13112,P52789
1	159	5	GO:0006626	BP	protein targeting to mitochondrion	6	P26368,Q9Y2W2,O60220,Q01081,Q10713
1	285	1	GO:0016050	BP	vesicle organization	5	O00161
1	129	1	GO:0048284	BP	organelle fusion	5	O00161
1	102	1	GO:0090174	BP	organelle membrane fusion	6	O00161
1	82	1	GO:0006906	BP	vesicle fusion	7	O00161
1	15	1	GO:0099500	BP	vesicle fusion to plasma membrane	8	O00161
1	15	1	GO:0090382	BP	phagosome maturation	5	Q13636
1	62	1	GO:0007032	BP	endosome organization	5	P40818
1	92	1	GO:0007030	BP	Golgi organization	5	Q14155
1	116	2	GO:0031023	BP	microtubule organizing center organization	5	Q15061,Q15004
1	108	1	GO:0051297	BP	centrosome organization	6	Q15004
9.13e-20	2476	58	GO:0022607	BP	cellular component assembly	4	Q9NQ29,Q9NQW6,P51948,P26368,P04181,Q96MU7,Q9NW64,Q9ULW0,O00161,Q14155,O00505,Q8N1F7,P49711,O75822,Q16698,O95232,P50416,P57740,Q16630,Q8TDN6,P52298,Q9NRZ9,Q9P032,O95573,P61244,Q16718,Q8IWC1,Q09161,Q9GZS1,P17096,Q99590,Q7Z3K3,P10809,Q9Y383,P38159,Q8N684,Q9NR56,Q96SI1,Q13112,P55265,P53367,Q9H814,O75475,Q2NL82,O95400,Q9BTL3,Q9BUQ8,Q9P258,P18754,P34897,P13984,P07305,P36776,P62805,Q86U70,Q9ULC4,Q9BW19,…
1	18	1	GO:0031163	BP	metallo-sulfur cluster assembly	5	Q9Y697
1	18	1	GO:0016226	BP	iron-sulfur cluster assembly	6	Q9Y697
1	2	1	GO:0044571	BP	[2Fe-2S] cluster assembly	7	Q9Y697
6.9e-26	1649	55	GO:0065003	BP	macromolecular complex assembly	5	Q9NQ29,Q9NQW6,P51948,P26368,P04181,Q96MU7,Q9NW64,Q9ULW0,O00161,O00505,Q8N1F7,P49711,O75822,Q16698,O95232,P50416,P57740,Q16630,Q8TDN6,P52298,Q9NRZ9,Q9P032,O95573,P61244,Q16718,Q8IWC1,Q09161,Q9GZS1,P17096,Q99590,Q7Z3K3,P10809,Q9Y383,P38159,Q8N684,Q9NR56,Q96SI1,Q13112,P55265,P53367,Q9H814,O75475,Q2NL82,O95400,Q9BTL3,Q9BUQ8,P18754,P34897,P13984,P07305,P36776,P62805,Q9ULC4,Q9BW19,Q9Y697
3.89e-19	923	37	GO:0034622	BP	cellular macromolecular complex assembly	6	Q9NQ29,Q9NQW6,P26368,Q96MU7,Q9NW64,O00161,Q8N1F7,O75822,O95232,P57740,Q8TDN6,P52298,Q9NRZ9,Q9P032,Q16718,Q8IWC1,Q09161,Q9GZS1,Q99590,Q7Z3K3,P10809,Q9Y383,Q9NR56,Q13112,P55265,P53367,Q9H814,O75475,Q2NL82,O95400,Q9BTL3,Q9BUQ8,P13984,P07305,P36776,P62805,Q9ULC4
0.109	193	7	GO:0065004	BP	protein-DNA complex assembly	7	Q9NRZ9,Q9GZS1,Q7Z3K3,Q13112,P13984,P07305,P62805
1	51	3	GO:0034508	BP	centromere complex assembly	8	Q9NRZ9,Q7Z3K3,P62805
7.79e-17	203	20	GO:0022618	BP	ribonucleoprotein complex assembly	7	Q9NQ29,P26368,Q96MU7,Q9NW64,O75822,O95232,Q8TDN6,P52298,Q09161,Q99590,Q9Y383,Q9NR56,P55265,Q9H814,O75475,Q2NL82,O95400,Q9BTL3,Q9BUQ8,Q9ULC4
1	24	1	GO:0065005	BP	protein-lipid complex assembly	6	O95573
1.02e-08	1400	31	GO:0006461	BP	protein complex assembly	6	Q9NQW6,P51948,P04181,Q9ULW0,O00161,O00505,Q8N1F7,Q16698,P50416,P57740,Q16630,Q9P032,P61244,Q16718,Q8IWC1,P17096,Q7Z3K3,P10809,P38159,Q8N684,Q96SI1,Q13112,P53367,P18754,P34897,P13984,P07305,P36776,P62805,Q9BW19,Q9Y697
0.238	463	10	GO:0051259	BP	protein oligomerization	7	P04181,Q16698,P50416,Q16630,P38159,Q8N684,Q96SI1,P34897,P36776,P62805
1	114	1	GO:0051291	BP	protein heterooligomerization	8	P62805
1	134	5	GO:0051262	BP	protein tetramerization	8	Q16698,Q16630,Q8N684,P34897,P62805
1	38	1	GO:0051290	BP	protein heterotetramerization	9	P62805
1	265	6	GO:0051260	BP	protein homooligomerization	8	Q16698,P50416,P38159,Q96SI1,P34897,P36776
1	61	2	GO:0051289	BP	protein homotetramerization	9	Q16698,P34897
1	7	1	GO:0034214	BP	protein hexamerization	8	P04181
1	13	2	GO:0046931	BP	pore complex assembly	7	Q8N1F7,P57740
0.184	540	11	GO:0043623	BP	cellular protein complex assembly	7	Q9NQW6,O00161,Q8N1F7,P57740,Q9P032,Q16718,Q8IWC1,Q7Z3K3,P10809,P53367,P36776
1	234	2	GO:0051258	BP	protein polymerization	8	Q8IWC1,P53367
1	53	1	GO:0046785	BP	microtubule polymerization	9	Q8IWC1
1	163	1	GO:0030041	BP	actin filament polymerization	9	P53367
1	15	2	GO:0051131	BP	chaperone-mediated protein complex assembly	8	P10809,P36776
1	63	2	GO:0010257	BP	NADH dehydrogenase complex assembly	8	Q9P032,Q16718
1	82	2	GO:0033108	BP	mitochondrial respiratory chain complex assembly	8	Q9P032,Q16718
1	63	2	GO:0032981	BP	mitochondrial respiratory chain complex I assembly	9	Q9P032,Q16718
1	8	2	GO:0051292	BP	nuclear pore complex assembly	8	Q8N1F7,P57740
0.332	162	6	GO:0031497	BP	chromatin assembly	6	P49711,Q9NRZ9,P17096,Q13112,P07305,P62805
1	10	2	GO:0031507	BP	heterochromatin assembly	7	Q9NRZ9,P17096
1	3	1	GO:0035986	BP	senescence-associated heterochromatin focus assembly	8	P17096
1	2	1	GO:0031508	BP	pericentric heterochromatin assembly	8	Q9NRZ9
1	8	1	GO:0016584	BP	nucleosome positioning	7	P49711
1	144	3	GO:0006334	BP	nucleosome assembly	7	Q13112,P07305,P62805
1	53	1	GO:0006336	BP	DNA replication-independent nucleosome assembly	8	P62805
1	42	1	GO:0034080	BP	CENP-A containing nucleosome assembly	9	P62805
1	32	2	GO:0006335	BP	DNA replication-dependent nucleosome assembly	8	Q13112,P62805
1	581	7	GO:0070925	BP	organelle assembly	5	Q9NQW6,Q9ULW0,Q8TDN6,Q7Z3K3,Q2NL82,P18754,Q9BW19
1	52	2	GO:0042255	BP	ribosome assembly	6	Q8TDN6,Q2NL82
1	22	1	GO:0000027	BP	ribosomal large subunit assembly	7	Q8TDN6
1	1	1	GO:0000921	BP	septin ring assembly	6	Q9NQW6
1	81	3	GO:0051225	BP	spindle assembly	6	Q9ULW0,P18754,Q9BW19
1	47	2	GO:0090307	BP	mitotic spindle assembly	7	Q9ULW0,Q9BW19
1	12	1	GO:0051382	BP	kinetochore assembly	6	Q7Z3K3
1	236	2	GO:0034329	BP	cell junction assembly	5	Q14155,Q9P258
1	88	2	GO:0007044	BP	cell-substrate junction assembly	6	Q14155,Q9P258
1	80	2	GO:0034333	BP	adherens junction assembly	6	Q14155,Q9P258
1	70	2	GO:0007045	BP	cell-substrate adherens junction assembly	7	Q14155,Q9P258
1	395	5	GO:0043062	BP	extracellular structure organization	4	P07339,P13674,P09038,O00622,P07203
1	394	5	GO:0030198	BP	extracellular matrix organization	5	P07339,P13674,P09038,O00622,P07203
1	21	1	GO:0097435	BP	fibril organization	6	P07203
1	134	1	GO:0022617	BP	extracellular matrix disassembly	6	P07339
1	42	1	GO:0030199	BP	collagen fibril organization	6	P13674
1	26	1	GO:0043954	BP	cellular component maintenance	4	O75717
1	3	1	GO:0070827	BP	chromatin maintenance	5	O75717
1	2	1	GO:0070829	BP	heterochromatin maintenance	6	O75717
1	1521	9	GO:0030030	BP	cell projection organization	4	P30086,Q14155,O43852,P61289,P09038,P00533,P09543,Q9P258,P31150
1	43	1	GO:0031529	BP	ruffle organization	5	Q9P258
1	73	1	GO:0097581	BP	lamellipodium organization	5	Q14155
1	375	2	GO:0030031	BP	cell projection assembly	5	Q14155,Q9P258
1	58	1	GO:0030032	BP	lamellipodium assembly	6	Q14155
1	30	1	GO:0097178	BP	ruffle assembly	6	Q9P258
1	340	1	GO:0032535	BP	regulation of cellular component size	4	P53367
1.62e-123	10390	240	GO:0044237	BP	cellular metabolic process	3	P23511,O75223,Q9NQ29,Q9UIG0,P31930,Q9Y5J1,O95394,P51948,P49959,Q8IX12,O75390,P26368,P04181,Q15717,Q13428,O43709,O15460,P31040,Q969G3,O75530,Q00325,Q15054,Q13362,Q96FV9,P55809,Q96MU7,Q9Y2W2,P40939,Q8IWX8,Q9NW64,Q9BXP5,Q92945,Q9ULW0,P30086,P35637,Q9P2N5,Q6P6C2,Q9Y5N6,Q5SRE5,Q99459,Q96RN5,O00541,P61218,Q92841,Q96EK6,Q13573,Q6PJT7,Q9UKV3,P27695,Q9HCK8,Q9H307,P78406,Q9NV56,O43148,O43719,Q8N1F7,P49711,…
3.53e-07	3149	45	GO:0006793	BP	phosphorus metabolic process	4	Q9UIG0,P31930,O95394,P51948,P49959,Q13362,P40939,Q9ULW0,P30086,P06732,Q02218,Q9UNW1,P06576,O14519,O43598,Q9Y305,O95573,Q16718,P61289,Q9HCC0,Q9H0C8,P51946,P09038,O00622,O43768,O75915,P00533,Q6XQN6,P25705,Q4G0N4,P49792,Q6YHK3,P52789,P55265,Q14558,Q8WVY7,P30048,P35232,O95400,P09543,P17706,P49761,Q9Y5S2,P07203,Q9Y697
6.32e-07	3088	44	GO:0006796	BP	phosphate-containing compound metabolic process	5	Q9UIG0,P31930,O95394,P51948,P49959,Q13362,P40939,Q9ULW0,P30086,P06732,Q02218,Q9UNW1,P06576,O14519,O43598,O95573,Q16718,P61289,Q9HCC0,Q9H0C8,P51946,P09038,O00622,O43768,O75915,P00533,Q6XQN6,P25705,Q4G0N4,P49792,Q6YHK3,P52789,P55265,Q14558,Q8WVY7,P30048,P35232,O95400,P09543,P17706,P49761,Q9Y5S2,P07203,Q9Y697
1	434	7	GO:0016311	BP	dephosphorylation	6	Q13362,Q9UNW1,Q9H0C8,O43768,Q8WVY7,O95400,P17706
0.0129	2213	28	GO:0016310	BP	phosphorylation	6	Q9UIG0,P31930,P51948,P49959,Q9ULW0,P30086,P06732,Q02218,O14519,Q16718,P61289,Q9H0C8,P51946,P09038,O00622,O75915,P00533,Q4G0N4,P49792,Q6YHK3,P52789,P55265,Q14558,P30048,P35232,P17706,P49761,Q9Y5S2
0.0012	1081	20	GO:0019637	BP	organophosphate metabolic process	5	P31930,O95394,P40939,P06732,Q02218,Q9UNW1,P06576,O43598,O95573,Q16718,Q9HCC0,P09038,Q6XQN6,P25705,Q4G0N4,P52789,Q14558,P09543,P07203,Q9Y697
1	595	10	GO:0090407	BP	organophosphate biosynthetic process	6	P40939,P06732,P06576,O95573,P09038,Q6XQN6,P25705,Q4G0N4,Q14558,Q9Y697
1	156	3	GO:0046434	BP	organophosphate catabolic process	6	O43598,P09543,P07203
1	534	7	GO:0019693	BP	ribose phosphate metabolic process	6	P31930,Q02218,P06576,Q16718,Q9HCC0,P25705,P52789
1	267	2	GO:0046390	BP	ribose phosphate biosynthetic process	7	P06576,P25705
1	2	1	GO:0019255	BP	glucose 1-phosphate metabolic process	6	O95394
1	27	1	GO:0051156	BP	glucose 6-phosphate metabolic process	6	P52789
1	68	2	GO:0043647	BP	inositol phosphate metabolic process	6	Q9UNW1,P09038
1	19	1	GO:0032958	BP	inositol phosphate biosynthetic process	7	P09038
4.83e-102	8596	208	GO:0044260	BP	cellular macromolecule metabolic process	4	P23511,Q9NQ29,Q9UIG0,Q9Y5J1,O95394,P51948,P49959,Q8IX12,P26368,Q15717,Q13428,O43709,O15460,Q969G3,O75530,Q00325,Q15054,Q13362,Q96FV9,Q96MU7,Q9Y2W2,Q8IWX8,Q9NW64,Q9BXP5,Q92945,Q9ULW0,P30086,P35637,Q9P2N5,Q6P6C2,Q9Y5N6,Q5SRE5,Q99459,Q96RN5,O00541,P61218,Q92841,Q96EK6,Q13573,Q6PJT7,Q9UKV3,P27695,Q9HCK8,Q9H307,P78406,Q9NV56,O43148,O43719,Q8N1F7,P49711,P56270,O75822,P08621,P49005,Q9Y657,Q99567,P17844,…
3.54e-07	280	14	GO:0043414	BP	macromolecule methylation	5	O75530,Q13573,O43148,P49711,Q7KZ85,Q9NRZ9,Q92979,Q8WXI9,Q9BV86,Q86YP4,Q7L0Y3,Q9H3P2,P62805,Q6PD62
1	151	2	GO:0043112	BP	receptor metabolic process	5	Q00610,Q13636
1	82	2	GO:0031623	BP	receptor internalization	6	Q00610,Q13636
1	17	1	GO:0020027	BP	hemoglobin metabolic process	5	Q86U70
6.27e-18	5157	81	GO:0044267	BP	cellular protein metabolic process	5	Q9UIG0,O95394,P51948,P49959,Q15717,O15460,O75530,Q00325,Q13362,Q9BXP5,Q9ULW0,P30086,Q5SRE5,Q96EK6,Q13573,P78406,Q9NV56,Q8N1F7,P49711,O75822,P08621,Q99567,Q7KZ85,O14519,P57740,P52298,P23246,Q16222,Q6PI48,P22626,P13674,Q15014,Q12931,P35658,O60220,Q5T4S7,Q8NBJ7,Q9NVN8,P61289,Q9H0C8,P51946,Q09161,P40818,P09038,Q9Y6I4,O00622,O43768,Q10471,P49458,P10809,O75915,P00533,Q9BV86,P49792,Q6YHK3,O60841,P55265,…
3.61e-12	3959	61	GO:0006464	BP	cellular protein modification process	6	Q9UIG0,O95394,P51948,P49959,O15460,O75530,Q13362,Q9ULW0,P30086,Q5SRE5,Q96EK6,Q13573,P78406,Q9NV56,Q8N1F7,P49711,Q99567,Q7KZ85,O14519,P57740,P23246,Q16222,P13674,Q15014,P35658,Q5T4S7,Q8NBJ7,Q9NVN8,P61289,Q9H0C8,P51946,P40818,P09038,Q9Y6I4,O00622,O43768,Q10471,O75915,P00533,Q9BV86,P49792,Q6YHK3,P55265,P04843,Q8WVY7,Q9NV06,P30048,P35232,O95400,P17706,P49761,P34897,Q13330,Q9H3P2,P08174,P62805,Q86U70,…
0.122	1023	16	GO:0070647	BP	protein modification by small protein conjugation or removal	7	Q5SRE5,P78406,Q8N1F7,Q99567,P57740,P35658,Q5T4S7,Q9NVN8,P61289,P40818,Q9Y6I4,P49792,Q9NV06,P34897,Q13330,Q6PD62
1	896	13	GO:0032446	BP	protein modification by small protein conjugation	8	Q5SRE5,P78406,Q8N1F7,Q99567,P57740,P35658,Q5T4S7,Q9NVN8,P61289,P49792,Q9NV06,Q13330,Q6PD62
1	784	6	GO:0016567	BP	protein ubiquitination	9	Q5T4S7,Q9NVN8,P61289,Q9NV06,Q13330,Q6PD62
1	224	1	GO:0000209	BP	protein polyubiquitination	10	P61289
1	53	1	GO:0006513	BP	protein monoubiquitination	10	Q6PD62
1	51	1	GO:0051865	BP	protein autoubiquitination	10	Q13330
1	145	3	GO:0070646	BP	protein modification by small protein removal	8	P40818,Q9Y6I4,P34897
1	128	3	GO:0016579	BP	protein deubiquitination	9	P40818,Q9Y6I4,P34897
1	25	2	GO:0070536	BP	protein K63-linked deubiquitination	10	P40818,P34897
1	22	1	GO:0071108	BP	protein K48-linked deubiquitination	10	P40818
1	42	1	GO:0008214	BP	protein dealkylation	7	P62805
1	42	1	GO:0006482	BP	protein demethylation	8	P62805
0.0328	160	7	GO:0008213	BP	protein alkylation	7	O75530,Q13573,P49711,Q7KZ85,Q9BV86,Q9H3P2,Q6PD62
0.0328	160	7	GO:0006479	BP	protein methylation	8	O75530,Q13573,P49711,Q7KZ85,Q9BV86,Q9H3P2,Q6PD62
1	217	4	GO:0043543	BP	protein acylation	7	Q9NV56,P49711,Q15014,Q86U70
1	187	4	GO:0006473	BP	protein acetylation	8	Q9NV56,P49711,Q15014,Q86U70
1	162	4	GO:0006475	BP	internal protein amino acid acetylation	9	Q9NV56,P49711,Q15014,Q86U70
1	2	1	GO:0018282	BP	metal incorporation into metallo-sulfur cluster	7	Q9Y697
1	2	1	GO:0018283	BP	iron incorporation into metallo-sulfur cluster	8	Q9Y697
1	85	3	GO:0035601	BP	protein deacylation	7	P23246,Q15014,P35232
1	80	3	GO:0006476	BP	protein deacetylation	8	P23246,Q15014,P35232
1	28	1	GO:0031365	BP	N-terminal protein amino acid modification	7	Q9BV86
1	2	1	GO:0006480	BP	N-terminal protein amino acid methylation	8	Q9BV86
5.56e-09	1367	31	GO:0018193	BP	peptidyl-amino acid modification	7	Q9UIG0,O95394,O15460,O75530,Q5SRE5,Q96EK6,Q13573,P78406,Q9NV56,Q8N1F7,P49711,Q99567,Q7KZ85,P57740,Q16222,P13674,Q15014,P35658,Q10471,P00533,Q9BV86,P49792,P04843,P30048,P17706,P49761,Q13330,Q9H3P2,P08174,Q86U70,Q6PD62
1	25	1	GO:0018198	BP	peptidyl-cysteine modification	8	P30048
1	264	2	GO:0018209	BP	peptidyl-serine modification	8	Q10471,Q9BV86
1	1	1	GO:0035570	BP	N-terminal peptidyl-serine methylation	9	Q9BV86
1	1	1	GO:0035572	BP	N-terminal peptidyl-serine dimethylation	10	Q9BV86
1	1	1	GO:0035573	BP	N-terminal peptidyl-serine trimethylation	10	Q9BV86
1	338	4	GO:0018212	BP	peptidyl-tyrosine modification	8	Q9UIG0,P00533,P17706,P49761
1	1	1	GO:0018194	BP	peptidyl-alanine modification	8	Q9BV86
1	1	1	GO:0018011	BP	N-terminal peptidyl-alanine methylation	9	Q9BV86
1	1	1	GO:0018012	BP	N-terminal peptidyl-alanine trimethylation	10	Q9BV86
1	249	5	GO:0018196	BP	peptidyl-asparagine modification	8	O95394,Q96EK6,Q16222,P04843,P08174
1	83	1	GO:0018210	BP	peptidyl-threonine modification	8	Q10471
0.489	61	4	GO:0018208	BP	peptidyl-proline modification	8	O15460,P13674,Q9BV86,P49792
1	1	1	GO:0035568	BP	N-terminal peptidyl-proline methylation	9	Q9BV86
1	1	1	GO:0018016	BP	N-terminal peptidyl-proline dimethylation	10	Q9BV86
1	47	1	GO:0000413	BP	protein peptidyl-prolyl isomerization	9	P49792
4.6e-08	398	17	GO:0018205	BP	peptidyl-lysine modification	8	O75530,Q5SRE5,Q13573,P78406,Q9NV56,Q8N1F7,P49711,Q99567,Q7KZ85,P57740,Q15014,P35658,P49792,Q13330,Q9H3P2,Q86U70,Q6PD62
1	161	4	GO:0018394	BP	peptidyl-lysine acetylation	9	Q9NV56,P49711,Q15014,Q86U70
1	156	4	GO:0018393	BP	internal peptidyl-lysine acetylation	10	Q9NV56,P49711,Q15014,Q86U70
0.000522	127	8	GO:0016925	BP	protein sumoylation	9	Q5SRE5,P78406,Q8N1F7,Q99567,P57740,P35658,P49792,Q13330
0.438	109	5	GO:0018022	BP	peptidyl-lysine methylation	9	O75530,Q13573,Q7KZ85,Q9H3P2,Q6PD62
1	31	1	GO:0018023	BP	peptidyl-lysine trimethylation	10	Q6PD62
1	18	2	GO:0018126	BP	protein hydroxylation	7	O15460,P13674
1	13	2	GO:0019511	BP	peptidyl-proline hydroxylation	8	O15460,P13674
4.44e-05	478	15	GO:0043687	BP	post-translational protein modification	7	O95394,Q5SRE5,Q96EK6,P78406,Q8N1F7,Q99567,P57740,Q16222,P35658,Q8NBJ7,Q10471,P49792,P04843,Q13330,P08174
1	1849	18	GO:0006468	BP	protein phosphorylation	7	Q9UIG0,P51948,P49959,Q9ULW0,P30086,O14519,P61289,P51946,P09038,O00622,O75915,P00533,Q6YHK3,P55265,P35232,P17706,P49761,Q9Y5S2
1	8	1	GO:0100002	BP	negative regulation of protein kinase activity by protein phosphorylation	8	P55265
1	230	3	GO:0046777	BP	protein autophosphorylation	8	P49959,P00533,P49761
1	336	4	GO:0018108	BP	peptidyl-tyrosine phosphorylation	8	Q9UIG0,P00533,P17706,P49761
1	335	6	GO:0006470	BP	protein dephosphorylation	7	Q13362,Q9H0C8,O43768,Q8WVY7,O95400,P17706
1	101	1	GO:0035335	BP	peptidyl-tyrosine dephosphorylation	8	P17706
1	8	2	GO:0018158	BP	protein oxidation	7	P30048,P07203
1	3	1	GO:0018171	BP	peptidyl-cysteine oxidation	8	P30048
8.12e-05	429	14	GO:0016570	BP	histone modification	7	Q9UIG0,O75530,Q13573,Q9NV56,P49711,Q7KZ85,P23246,Q15014,Q9Y6I4,P35232,Q9H3P2,P62805,Q86U70,Q6PD62
1	40	1	GO:0016574	BP	histone ubiquitination	8	Q6PD62
1	10	1	GO:0033523	BP	histone H2B ubiquitination	9	Q6PD62
1	23	1	GO:0010390	BP	histone monoubiquitination	9	Q6PD62
1	68	3	GO:0016575	BP	histone deacetylation	8	P23246,Q15014,P35232
1	22	1	GO:0070932	BP	histone H3 deacetylation	9	P23246
1	40	1	GO:0016577	BP	histone demethylation	8	P62805
1	38	1	GO:0070076	BP	histone lysine demethylation	9	P62805
1	16	1	GO:0035574	BP	histone H4-K20 demethylation	10	P62805
0.0868	127	6	GO:0016571	BP	histone methylation	8	O75530,Q13573,P49711,Q7KZ85,Q9H3P2,Q6PD62
0.279	99	5	GO:0034968	BP	histone lysine methylation	9	O75530,Q13573,Q7KZ85,Q9H3P2,Q6PD62
1	15	2	GO:0070734	BP	histone H3-K27 methylation	10	O75530,Q7KZ85
1	3	1	GO:0034729	BP	histone H3-K79 methylation	10	Q6PD62
1	53	3	GO:0051568	BP	histone H3-K4 methylation	10	Q13573,Q9H3P2,Q6PD62
1	12	1	GO:0080182	BP	histone H3-K4 trimethylation	11	Q6PD62
1	22	1	GO:0016578	BP	histone deubiquitination	8	Q9Y6I4
1	32	1	GO:0016572	BP	histone phosphorylation	8	Q9UIG0
1	151	4	GO:0016573	BP	histone acetylation	8	Q9NV56,P49711,Q15014,Q86U70
1	15	1	GO:0043968	BP	histone H2A acetylation	9	Q15014
1	61	1	GO:0043966	BP	histone H3 acetylation	9	Q86U70
1	1	1	GO:0043973	BP	histone H3-K4 acetylation	10	Q86U70
1	64	1	GO:0043967	BP	histone H4 acetylation	9	Q15014
1	9	1	GO:0034982	BP	mitochondrial protein processing	6	Q10713
1	6	1	GO:0006627	BP	protein processing involved in protein targeting to mitochondrion	7	Q10713
1	552	6	GO:0009100	BP	glycoprotein metabolic process	5	O95394,Q96EK6,Q16222,Q10471,P04843,P08174
4.74e-07	1736	32	GO:0044248	BP	cellular catabolic process	4	P26368,P04181,Q13362,P55809,Q9Y2W2,P40939,Q92945,Q16698,P08621,Q02218,P50416,O43598,P52298,Q5T4S7,P30084,P61289,Q9HCC0,P21266,P15586,Q09161,P40818,Q9Y6I4,P00367,Q01081,P61221,P30048,Q9Y3B2,P09543,Q13330,P07305,P36776,P07203
0.677	956	14	GO:0044265	BP	cellular macromolecule catabolic process	5	Q13362,Q92945,P52298,Q5T4S7,P61289,Q09161,P40818,Q9Y6I4,P61221,Q9Y3B2,Q13330,P07305,P36776,P07203
1	598	7	GO:0043632	BP	modification-dependent macromolecule catabolic process	6	Q13362,Q5T4S7,P61289,P40818,Q9Y6I4,Q13330,P36776
1	681	8	GO:0044257	BP	cellular protein catabolic process	6	Q13362,Q5T4S7,P61289,P40818,Q9Y6I4,Q13330,P36776,P07203
1	650	8	GO:0051603	BP	proteolysis involved in cellular protein catabolic process	7	Q13362,Q5T4S7,P61289,P40818,Q9Y6I4,Q13330,P36776,P07203
1	17	1	GO:0006515	BP	misfolded or incompletely synthesized protein catabolic process	8	P36776
1	409	4	GO:0010498	BP	proteasomal protein catabolic process	8	Q13362,P61289,Q13330,P07203
1	590	7	GO:0019941	BP	modification-dependent protein catabolic process	8	Q13362,Q5T4S7,P61289,P40818,Q9Y6I4,Q13330,P36776
1	1	1	GO:0070407	BP	oxidation-dependent protein catabolic process	9	P36776
1	582	6	GO:0006511	BP	ubiquitin-dependent protein catabolic process	9	Q13362,Q5T4S7,P61289,P40818,Q9Y6I4,Q13330
1	383	3	GO:0043161	BP	proteasome-mediated ubiquitin-dependent protein catabolic process	10	Q13362,P61289,Q13330
1	120	1	GO:0031145	BP	anaphase-promoting complex-dependent proteasomal ubiquitin-dependent protein catabolic process	11	P61289
1	200	2	GO:0042787	BP	protein ubiquitination involved in ubiquitin-dependent protein catabolic process	10	Q5T4S7,P61289
4.9e-110	5921	189	GO:0006725	BP	cellular aromatic compound metabolic process	4	P23511,Q9NQ29,Q9UIG0,P31930,Q9Y5J1,O95394,P51948,P49959,Q8IX12,P26368,Q13428,O43709,Q969G3,O75530,Q15054,Q96FV9,Q96MU7,Q9Y2W2,Q8IWX8,Q9NW64,Q9BXP5,Q92945,P35637,Q9P2N5,Q6P6C2,Q9Y5N6,Q5SRE5,Q99459,Q96RN5,O00541,P61218,Q92841,Q96EK6,Q13573,Q6PJT7,Q9UKV3,P27695,Q9HCK8,Q9H307,P78406,Q9NV56,O43148,O43719,Q8N1F7,P49711,P56270,P08621,Q02218,P49005,Q9Y657,Q99567,P17844,O95232,Q7KZ85,P06576,O14519,Q8NHQ9,…
1	24	1	GO:0042537	BP	benzene-containing compound metabolic process	5	P21266
1	4	1	GO:0018916	BP	nitrobenzene metabolic process	6	P21266
0.977	455	9	GO:0019439	BP	aromatic compound catabolic process	5	Q92945,O43598,P52298,Q09161,P61221,Q9Y3B2,P09543,P07305,P07203
6.43e-114	5905	192	GO:0046483	BP	heterocycle metabolic process	4	P23511,Q9NQ29,Q9UIG0,P31930,Q9Y5J1,O95394,P51948,P49959,Q8IX12,P26368,P04181,Q13428,O43709,O15460,Q969G3,O75530,Q15054,Q96FV9,Q96MU7,Q9Y2W2,Q8IWX8,Q9NW64,Q9BXP5,Q92945,P35637,Q9P2N5,Q6P6C2,Q9Y5N6,Q5SRE5,Q99459,Q96RN5,O00541,P61218,Q92841,Q96EK6,Q13573,Q6PJT7,Q9UKV3,P27695,Q9HCK8,Q9H307,P78406,Q9NV56,O43148,O43719,Q8N1F7,P49711,P56270,P08621,Q02218,P49005,Q9Y657,Q99567,P17844,O95232,Q7KZ85,P06576,…
0.82	444	9	GO:0046700	BP	heterocycle catabolic process	5	Q92945,O43598,P52298,Q09161,P61221,Q9Y3B2,P09543,P07305,P07203
1	34	1	GO:0042558	BP	pteridine-containing compound metabolic process	5	P34897
1	248	6	GO:0072593	BP	reactive oxygen species metabolic process	4	Q12931,O00622,P00533,P52789,P30048,P07203
1	48	2	GO:0042743	BP	hydrogen peroxide metabolic process	5	P30048,P07203
1	23	2	GO:0042744	BP	hydrogen peroxide catabolic process	6	P30048,P07203
1	91	2	GO:1903409	BP	reactive oxygen species biosynthetic process	5	Q12931,P00533
1	83	1	GO:0046209	BP	nitric oxide metabolic process	5	P00533
0.0493	383	10	GO:0006790	BP	sulfur compound metabolic process	4	O75223,Q02218,Q9Y305,O95573,Q9HCC0,P21266,P15586,P08047,P07203,Q9Y697
1	91	3	GO:0035383	BP	thioester metabolic process	5	Q02218,Q9Y305,O95573
1	46	1	GO:0044273	BP	sulfur compound catabolic process	5	P15586
1	32	2	GO:1901685	BP	glutathione derivative metabolic process	5	O75223,P21266
1	7	1	GO:0070813	BP	hydrogen sulfide metabolic process	5	P08047
0.197	366	9	GO:0051186	BP	cofactor metabolic process	4	Q02218,Q9Y305,O95573,Q9HCC0,Q6XQN6,Q4G0N4,P52789,P34897,Q9Y697
0.05	306	9	GO:0006732	BP	coenzyme metabolic process	5	Q02218,Q9Y305,O95573,Q9HCC0,Q6XQN6,Q4G0N4,P52789,P34897,Q9Y697
1	142	4	GO:0006733	BP	oxidoreduction coenzyme metabolic process	6	Q02218,Q6XQN6,Q4G0N4,P52789
1	91	3	GO:0006637	BP	acyl-CoA metabolic process	6	Q02218,Q9Y305,O95573
1	52	2	GO:0035337	BP	fatty-acyl-CoA metabolic process	7	Q9Y305,O95573
1	46	2	GO:0035336	BP	long-chain fatty-acyl-CoA metabolic process	8	Q9Y305,O95573
1	5	1	GO:0006104	BP	succinyl-CoA metabolic process	7	Q02218
1	6	1	GO:0051189	BP	prosthetic group metabolic process	5	Q9Y697
1	6	1	GO:0043545	BP	molybdopterin cofactor metabolic process	6	Q9Y697
1	6	1	GO:0019720	BP	Mo-molybdopterin cofactor metabolic process	7	Q9Y697
0.00261	491	13	GO:0006091	BP	generation of precursor metabolites and energy	4	P31930,O75390,P31040,Q00325,Q02218,P06576,Q9P032,Q12931,Q16718,P10606,Q14643,P25705,P52789
0.0189	147	7	GO:0022900	BP	electron transport chain	5	P31930,P31040,P06576,Q9P032,Q16718,P10606,P25705
0.0126	402	11	GO:0015980	BP	energy derivation by oxidation of organic compounds	5	P31930,O75390,P31040,Q02218,P06576,Q9P032,Q12931,Q16718,P10606,Q14643,P25705
0.000264	213	10	GO:0045333	BP	cellular respiration	6	P31930,O75390,P31040,Q02218,P06576,Q9P032,Q12931,Q16718,P10606,P25705
0.588	64	4	GO:0009060	BP	aerobic respiration	7	P31930,O75390,P31040,Q02218
0.0173	145	7	GO:0022904	BP	respiratory electron transport chain	7	P31930,P31040,P06576,Q9P032,Q16718,P10606,P25705
1	183	1	GO:0006112	BP	energy reserve metabolic process	6	Q14643
3.16e-118	6616	203	GO:0034641	BP	cellular nitrogen compound metabolic process	4	P23511,O75223,Q9NQ29,Q9UIG0,P31930,Q9Y5J1,O95394,P51948,P49959,Q8IX12,P26368,P04181,Q15717,Q13428,O43709,Q969G3,O75530,Q00325,Q15054,Q96FV9,Q96MU7,Q9Y2W2,Q8IWX8,Q9NW64,Q9BXP5,Q92945,P35637,Q9P2N5,Q6P6C2,Q9Y5N6,Q5SRE5,Q99459,Q96RN5,O00541,P61218,Q92841,Q96EK6,Q13573,Q6PJT7,Q9UKV3,P27695,Q9HCK8,Q9H307,P78406,Q9NV56,O43148,O43719,Q8N1F7,P49711,P56270,O75822,P08621,P06732,Q02218,P49005,Q9Y657,Q99567,…
0.82	444	9	GO:0044270	BP	cellular nitrogen compound catabolic process	5	Q92945,O43598,P52298,Q09161,P61221,Q9Y3B2,P09543,P07305,P07203
1	230	3	GO:0044106	BP	cellular amine metabolic process	5	P06732,O95573,P61289
1	197	3	GO:0006576	BP	cellular biogenic amine metabolic process	6	P06732,O95573,P61289
1	89	1	GO:0042439	BP	ethanolamine-containing compound metabolic process	7	O95573
1	85	2	GO:0006595	BP	polyamine metabolic process	7	P06732,P61289
1	136	4	GO:0072524	BP	pyridine-containing compound metabolic process	5	Q02218,Q6XQN6,Q4G0N4,P52789
1	575	8	GO:0072521	BP	purine-containing compound metabolic process	5	P31930,Q02218,P06576,Q16718,Q9HCC0,P25705,P52789,P07203
1	56	1	GO:0072523	BP	purine-containing compound catabolic process	6	P07203
1.71e-05	1004	22	GO:0043603	BP	cellular amide metabolic process	5	O75223,Q15717,Q00325,Q9BXP5,O75822,P52298,Q6PI48,P22626,Q12931,Q9HCC0,P21266,Q09161,O00622,P49458,Q6XQN6,O60841,P55265,P04843,P34897,P82979,Q9ULC4,P07203
0.000505	835	18	GO:0006518	BP	peptide metabolic process	6	O75223,Q15717,Q00325,Q9BXP5,O75822,P52298,Q6PI48,P22626,Q12931,P21266,Q09161,P49458,O60841,P55265,P04843,P82979,Q9ULC4,P07203
1	4	1	GO:0006769	BP	nicotinamide metabolic process	6	Q6XQN6
1	17	1	GO:0006577	BP	amino-acid betaine metabolic process	5	P50416
2.86e-110	5722	187	GO:0006139	BP	nucleobase-containing compound metabolic process	5	P23511,Q9NQ29,Q9UIG0,P31930,Q9Y5J1,O95394,P51948,P49959,Q8IX12,P26368,Q13428,O43709,Q969G3,O75530,Q15054,Q96FV9,Q96MU7,Q9Y2W2,Q8IWX8,Q9NW64,Q9BXP5,Q92945,P35637,Q9P2N5,Q6P6C2,Q9Y5N6,Q5SRE5,Q99459,Q96RN5,O00541,P61218,Q92841,Q96EK6,Q13573,Q6PJT7,Q9UKV3,P27695,Q9HCK8,Q9H307,P78406,Q9NV56,O43148,O43719,Q8N1F7,P49711,P56270,P08621,Q02218,P49005,Q9Y657,Q99567,P17844,O95232,Q7KZ85,P06576,O14519,Q8NHQ9,…
2.65e-99	5125	171	GO:0090304	BP	nucleic acid metabolic process	6	P23511,Q9NQ29,Q9UIG0,Q9Y5J1,P51948,P49959,Q8IX12,P26368,Q13428,O43709,Q969G3,O75530,Q15054,Q96FV9,Q96MU7,Q9Y2W2,Q8IWX8,Q9NW64,Q9BXP5,Q92945,P35637,Q9P2N5,Q6P6C2,Q9Y5N6,Q5SRE5,Q99459,Q96RN5,O00541,P61218,Q92841,Q13573,Q6PJT7,Q9UKV3,P27695,Q9HCK8,Q9H307,P78406,Q9NV56,O43148,O43719,Q8N1F7,P49711,P56270,P08621,P49005,Q9Y657,Q99567,P17844,O95232,Q7KZ85,O14519,Q8NHQ9,P57740,Q16630,P46087,P84103,P53999,…
0.000165	258	11	GO:0090305	BP	nucleic acid phosphodiester bond hydrolysis	7	P49959,Q15054,P27695,P49005,P52298,O75691,P54278,Q9C0J8,Q09161,Q9GZR2,P07305
3.22e-22	978	41	GO:0006259	BP	DNA metabolic process	7	Q9UIG0,P51948,P49959,Q15054,Q96FV9,Q9Y5N6,Q99459,P61218,P27695,P49711,P49005,Q7KZ85,O14519,P23246,Q9NRZ9,P54278,Q15014,Q9NVN8,O60832,P51946,Q9UBD5,P09651,Q9C0J8,P17096,Q9Y6I4,Q8WXI9,P10809,P00533,P46013,Q00839,Q13112,Q15004,P35232,Q86YP4,Q9H2U1,P52292,Q13330,P07305,P36776,P62805,P05114
0.000698	298	11	GO:0006310	BP	DNA recombination	8	P49959,Q15054,Q96FV9,P27695,P49005,Q7KZ85,P23246,P54278,P10809,P52292,P62805
1	40	1	GO:0035825	BP	reciprocal DNA recombination	9	P49959
0.102	41	4	GO:0006312	BP	mitotic recombination	9	P49959,Q15054,P27695,P49005
0.304	54	4	GO:0016444	BP	somatic cell DNA recombination	9	Q96FV9,Q7KZ85,P54278,P10809
0.136	44	4	GO:0022616	BP	DNA strand elongation	8	P49959,Q15054,P27695,P49005
0.721	6	2	GO:0010216	BP	maintenance of DNA methylation	8	P49711,Q9NRZ9
0.0693	122	6	GO:0006304	BP	DNA modification	8	P27695,P49711,Q9NRZ9,Q8WXI9,Q86YP4,P62805
0.169	89	5	GO:0006305	BP	DNA alkylation	9	P49711,Q9NRZ9,Q8WXI9,Q86YP4,P62805
1	22	1	GO:0035510	BP	DNA dealkylation	9	P27695
0.0251	102	6	GO:0044728	BP	DNA methylation or demethylation	9	P27695,P49711,Q9NRZ9,Q8WXI9,Q86YP4,P62805
1	20	1	GO:0032042	BP	mitochondrial DNA metabolic process	8	P36776
5.78e-11	519	22	GO:0006281	BP	DNA repair	8	Q9UIG0,P51948,P49959,Q15054,Q99459,P61218,P27695,P49005,P23246,P54278,Q15014,P51946,Q9C0J8,P17096,Q9Y6I4,P00533,Q13112,Q15004,P52292,Q13330,P62805,P05114
1	74	2	GO:0000726	BP	non-recombinational repair	9	P49959,P62805
0.0521	116	6	GO:0006289	BP	nucleotide-excision repair	9	P51948,Q15054,P61218,P49005,P51946,P05114
0.00357	73	6	GO:0006283	BP	transcription-coupled nucleotide-excision repair	10	P51948,Q15054,P61218,P49005,P51946,P05114
0.52	62	4	GO:0070911	BP	global genome nucleotide-excision repair	10	P51948,Q15054,P49005,P51946
1	39	2	GO:0033683	BP	nucleotide-excision repair, DNA incision	10	Q15054,P49005
1	7	1	GO:0006290	BP	pyrimidine dimer repair	9	P05114
1	3	1	GO:0000720	BP	pyrimidine dimer repair by nucleotide-excision repair	10	P05114
0.263	52	4	GO:0006284	BP	base-excision repair	9	Q15054,P27695,P49005,P17096
1	38	3	GO:0006298	BP	mismatch repair	9	Q15054,P49005,P54278
1	227	6	GO:0006302	BP	double-strand break repair	9	Q9UIG0,P49959,P23246,P52292,Q13330,P62805
1	67	2	GO:0006303	BP	double-strand break repair via nonhomologous end joining	10	P49959,P62805
0.489	61	4	GO:0006301	BP	postreplication repair	9	Q15054,P49005,Q9C0J8,Q15004
1	155	3	GO:0000725	BP	recombinational repair	9	P49959,P23246,P62805
1	155	3	GO:0000724	BP	double-strand break repair via homologous recombination	10	P49959,P23246,P62805
1	28	1	GO:0045003	BP	double-strand break repair via synthesis-dependent strand annealing	11	P49959
1	23	2	GO:0006297	BP	nucleotide-excision repair, DNA gap filling	8	Q15054,P49005
2.74e-06	132	10	GO:0000723	BP	telomere maintenance	8	P49959,Q15054,P27695,P49005,Q9NVN8,O60832,P09651,Q00839,Q9H2U1,P62805
1	31	1	GO:0016233	BP	telomere capping	9	P49959
1	4	1	GO:0031860	BP	telomeric 3' overhang formation	10	P49959
2.04e-05	84	8	GO:0010833	BP	telomere maintenance via telomere lengthening	9	P49959,Q15054,P27695,P49005,Q9NVN8,O60832,P09651,Q00839
0.879	30	3	GO:0000722	BP	telomere maintenance via recombination	9	Q15054,P27695,P49005
3.75e-89	4606	156	GO:0016070	BP	RNA metabolic process	7	P23511,Q9NQ29,Q9UIG0,Q9Y5J1,P51948,Q8IX12,P26368,Q13428,O43709,Q969G3,O75530,Q96FV9,Q96MU7,Q9Y2W2,Q8IWX8,Q9NW64,Q9BXP5,Q92945,P35637,Q9P2N5,Q6P6C2,Q5SRE5,Q99459,Q96RN5,O00541,P61218,Q92841,Q13573,Q6PJT7,Q9UKV3,P27695,Q9HCK8,Q9H307,P78406,Q9NV56,O43148,O43719,Q8N1F7,P49711,P56270,P08621,Q9Y657,Q99567,P17844,O95232,Q7KZ85,Q8NHQ9,P57740,Q16630,P46087,P84103,P53999,O14776,P52298,P23246,Q6PI48,O15446,…
1	32	2	GO:0000959	BP	mitochondrial RNA metabolic process	8	Q6PI48,Q7L0Y3
0.0025	38	5	GO:0043631	BP	RNA polyadenylation	8	Q6PJT7,Q16630,Q12849,Q9C0J8,Q6PD62
2.25e-34	480	41	GO:0034660	BP	ncRNA metabolic process	8	Q9Y5J1,Q13428,O43709,Q9Y2W2,Q9BXP5,Q92945,Q5SRE5,O00541,P61218,P78406,Q8N1F7,Q9Y657,Q99567,P57740,P46087,P52298,Q6PI48,O15446,O75691,P22626,Q96GQ7,Q92979,P35658,P51532,Q96P11,O60832,Q12849,Q9NY93,Q09161,Q9GZS1,Q96G46,P49792,Q9BVJ6,P55265,Q9H814,Q9NV06,Q9NR30,Q8IZ73,Q9Y3B2,Q7L0Y3,Q9Y2R4
1.08e-06	203	12	GO:0006399	BP	tRNA metabolic process	9	Q5SRE5,P78406,Q8N1F7,Q99567,P57740,Q6PI48,P35658,Q12849,Q96G46,P49792,Q8IZ73,Q7L0Y3
1	9	1	GO:0016074	BP	snoRNA metabolic process	9	O60832
1	1	1	GO:0033979	BP	box H/ACA snoRNA metabolic process	10	O60832
1	28	1	GO:0034587	BP	piRNA metabolic process	9	P61218
1	16	1	GO:0010586	BP	miRNA metabolic process	9	Q92945
4.01e-13	161	16	GO:0016072	BP	rRNA metabolic process	9	Q9Y5J1,O43709,Q9Y2W2,O00541,P46087,O75691,Q96GQ7,Q92979,Q96P11,O60832,Q9NY93,Q9BVJ6,Q9NV06,Q9NR30,Q9Y3B2,Q9Y2R4
1	34	1	GO:0016073	BP	snRNA metabolic process	9	O60832
1.89e-60	631	64	GO:0016071	BP	mRNA metabolic process	8	Q9NQ29,P51948,Q8IX12,P26368,Q96FV9,Q96MU7,Q9Y2W2,Q9NW64,Q92945,P35637,Q9P2N5,Q6P6C2,Q99459,P61218,Q13573,Q6PJT7,Q9UKV3,Q9H307,O43148,O43719,P08621,P17844,O95232,Q7KZ85,Q16630,P84103,P52298,P23246,O75940,P22626,P35269,Q9BTD8,O75937,O60832,Q14498,Q12849,P51946,P09651,Q9C0J8,Q09161,Q99590,Q8WVV9,Q7L014,Q9Y383,P38159,Q8N684,Q9NR56,Q00839,Q01081,P55265,Q01130,Q9H814,O75475,Q9UQ35,O95400,Q9BTL3,Q9Y3B2,…
1	24	2	GO:0008334	BP	histone mRNA metabolic process	9	P52298,Q09161
4.09e-11	45	10	GO:0010501	BP	RNA secondary structure unwinding	8	Q92841,P17844,Q8NHQ9,Q96GQ7,Q9NY93,Q7L014,Q9NR30,Q9BUQ8,Q9H2U1,Q9Y2R4
1	12	1	GO:0070525	BP	tRNA threonylcarbamoyladenosine metabolic process	8	Q7L0Y3
0.000491	126	8	GO:0009451	BP	RNA modification	8	Q6P6C2,O43148,Q92979,O60832,Q96G46,P55265,Q8IZ73,Q7L0Y3
1	8	1	GO:1900864	BP	mitochondrial RNA modification	9	Q7L0Y3
1	2	1	GO:0035513	BP	oxidative RNA demethylation	9	Q6P6C2
1	2	1	GO:0035553	BP	oxidative single-stranded RNA demethylation	10	Q6P6C2
1	9	1	GO:0016553	BP	base conversion or substitution editing	9	P55265
1	4	1	GO:0006382	BP	adenosine to inosine editing	10	P55265
1	17	2	GO:0001522	BP	pseudouridine synthesis	9	O60832,Q8IZ73
1	14	2	GO:0016556	BP	mRNA modification	9	O60832,P55265
1	2	1	GO:1990481	BP	mRNA pseudouridine synthesis	10	O60832
1	54	3	GO:0001510	BP	RNA methylation	9	O43148,Q92979,Q7L0Y3
1	2	1	GO:0040031	BP	snRNA modification	9	O60832
1	1	1	GO:0031120	BP	snRNA pseudouridine synthesis	10	O60832
0.518	113	5	GO:0090501	BP	RNA phosphodiester bond hydrolysis	8	P27695,P52298,O75691,Q9C0J8,Q09161
1	62	2	GO:0090502	BP	RNA phosphodiester bond hydrolysis, endonucleolytic	9	P27695,O75691
0.256	20	3	GO:0006379	BP	mRNA cleavage	9	P52298,Q9C0J8,Q09161
1.9e-98	821	95	GO:0006396	BP	RNA processing	8	Q9NQ29,Q9Y5J1,P51948,Q8IX12,P26368,O43709,Q96FV9,Q96MU7,Q9Y2W2,Q8IWX8,Q9NW64,Q9BXP5,Q92945,P35637,Q9P2N5,Q6P6C2,Q5SRE5,Q99459,O00541,P61218,Q92841,Q13573,Q6PJT7,Q9UKV3,Q9H307,P78406,O43148,O43719,Q8N1F7,P08621,Q99567,P17844,O95232,Q7KZ85,P57740,Q16630,P46087,P84103,P52298,P23246,O75940,O75691,P22626,Q96GQ7,P35269,Q9BTD8,O75937,Q92979,P35658,Q96P11,O60832,Q14498,Q12849,P51946,P09651,Q9NY93,Q9C0J8,…
3.43e-10	37	9	GO:0036260	BP	RNA capping	9	P51948,P61218,O43148,P52298,P35269,P51946,Q09161,Q9BTL3,P13984
3.43e-10	37	9	GO:0009452	BP	7-methylguanosine RNA capping	10	P51948,P61218,O43148,P52298,P35269,P51946,Q09161,Q9BTL3,P13984
1	4	1	GO:0036265	BP	RNA (guanine-N7)-methylation	11	O43148
3.05e-25	331	30	GO:0034470	BP	ncRNA processing	9	Q9Y5J1,O43709,Q9Y2W2,Q9BXP5,Q5SRE5,O00541,P78406,Q8N1F7,Q99567,P57740,P46087,O75691,P22626,Q96GQ7,Q92979,P35658,Q96P11,O60832,Q12849,Q9NY93,Q96G46,P49792,Q9BVJ6,P55265,Q9NV06,Q9NR30,Q8IZ73,Q9Y3B2,Q7L0Y3,Q9Y2R4
1	8	1	GO:0043144	BP	snoRNA processing	10	O60832
1	1	1	GO:0034964	BP	box H/ACA snoRNA processing	11	O60832
5.01e-07	148	11	GO:0008033	BP	tRNA processing	10	Q5SRE5,P78406,Q8N1F7,Q99567,P57740,P35658,Q12849,Q96G46,P49792,Q8IZ73,Q7L0Y3
1	70	3	GO:0006400	BP	tRNA modification	11	Q96G46,Q8IZ73,Q7L0Y3
1	5	1	GO:0002943	BP	tRNA dihydrouridine synthesis	12	Q96G46
1	6	1	GO:0031119	BP	tRNA pseudouridine synthesis	12	Q8IZ73
1	23	1	GO:0030488	BP	tRNA methylation	12	Q7L0Y3
2.17e-13	155	16	GO:0006364	BP	rRNA processing	10	Q9Y5J1,O43709,Q9Y2W2,O00541,P46087,O75691,Q96GQ7,Q92979,Q96P11,O60832,Q9NY93,Q9BVJ6,Q9NV06,Q9NR30,Q9Y3B2,Q9Y2R4
1	22	2	GO:0000460	BP	maturation of 5.8S rRNA	11	O00541,O75691
1	16	2	GO:0000466	BP	maturation of 5.8S rRNA from tricistronic rRNA transcript (SSU-rRNA, 5.8S rRNA, LSU-rRNA)	12	O00541,O75691
1	10	1	GO:0000470	BP	maturation of LSU-rRNA	11	O00541
1	9	1	GO:0000463	BP	maturation of LSU-rRNA from tricistronic rRNA transcript (SSU-rRNA, 5.8S rRNA, LSU-rRNA)	12	O00541
1	32	2	GO:0030490	BP	maturation of SSU-rRNA	11	O75691,Q9NV06
1	26	2	GO:0000462	BP	maturation of SSU-rRNA from tricistronic rRNA transcript (SSU-rRNA, 5.8S rRNA, LSU-rRNA)	12	O75691,Q9NV06
1	22	2	GO:0000154	BP	rRNA modification	11	Q92979,O60832
1	2	1	GO:0031118	BP	rRNA pseudouridine synthesis	12	O60832
1	18	1	GO:0031167	BP	rRNA methylation	12	Q92979
1	6	1	GO:0070475	BP	rRNA base methylation	13	Q92979
1	15	1	GO:0000469	BP	cleavage involved in rRNA processing	11	O75691
1	9	1	GO:0000478	BP	endonucleolytic cleavage involved in rRNA processing	12	O75691
1	9	1	GO:0000479	BP	endonucleolytic cleavage of tricistronic rRNA transcript (SSU-rRNA, 5.8S rRNA, LSU-rRNA)	13	O75691
1	3	1	GO:0000480	BP	endonucleolytic cleavage in 5'-ETS of tricistronic rRNA transcript (SSU-rRNA, 5.8S rRNA, LSU-rRNA)	14	O75691
1	6	1	GO:0000447	BP	endonucleolytic cleavage in ITS1 to separate SSU-rRNA from 5.8S rRNA and LSU-rRNA from tricistronic rRNA transcript (SSU-rRNA, 5.8S rRNA, LSU-rRNA)	14	O75691
0.507	25	3	GO:0031050	BP	dsRNA fragmentation	9	Q9BXP5,P22626,P55265
1.54e-53	383	51	GO:0008380	BP	RNA splicing	9	Q9NQ29,Q8IX12,P26368,Q96FV9,Q96MU7,Q9Y2W2,Q9NW64,Q92945,P35637,Q99459,P61218,Q13573,Q9UKV3,Q9H307,O43719,P08621,P17844,O95232,Q7KZ85,P84103,P52298,P23246,O75940,P22626,P35269,Q9BTD8,O75937,Q14498,P09651,Q09161,Q99590,Q8WVV9,Q7L014,Q9Y383,P38159,Q8N684,Q9NR56,Q00839,Q01081,Q01130,Q9H814,O75475,Q9UQ35,O95400,O43660,Q9BUQ8,Q13151,P49761,Q66PJ3,P13984,Q9BRL6
2.03e-48	289	44	GO:0000375	BP	RNA splicing, via transesterification reactions	10	Q9NQ29,Q8IX12,P26368,Q96MU7,Q9Y2W2,Q9NW64,Q92945,P35637,Q99459,P61218,Q13573,Q9UKV3,Q9H307,O43719,P08621,P17844,O95232,P84103,P52298,P23246,O75940,P22626,P35269,Q9BTD8,O75937,P09651,Q09161,Q99590,Q7L014,Q9Y383,P38159,Q8N684,Q9NR56,Q00839,Q01081,Q01130,Q9H814,O75475,Q9UQ35,O95400,O43660,Q9BUQ8,Q13151,P13984
1.87e-45	285	42	GO:0000377	BP	RNA splicing, via transesterification reactions with bulged adenosine as nucleophile	11	Q9NQ29,Q8IX12,P26368,Q96MU7,Q9Y2W2,Q9NW64,P35637,Q99459,P61218,Q13573,Q9UKV3,Q9H307,O43719,P08621,P17844,O95232,P84103,P52298,P23246,P22626,P35269,Q9BTD8,O75937,P09651,Q09161,Q99590,Q7L014,Q9Y383,P38159,Q8N684,Q9NR56,Q00839,Q01081,Q01130,Q9H814,O75475,Q9UQ35,O95400,O43660,Q9BUQ8,Q13151,P13984
2.47e-11	109	13	GO:0031123	BP	RNA 3'-end processing	9	P26368,Q6PJT7,Q16630,P84103,P52298,O60832,Q12849,Q9C0J8,Q09161,Q8N684,Q01081,Q01130,Q6PD62
1	21	1	GO:0043628	BP	ncRNA 3'-end processing	10	O60832
1	8	1	GO:0031126	BP	snoRNA 3'-end processing	11	O60832
1	1	1	GO:0000495	BP	box H/ACA snoRNA 3'-end processing	12	O60832
0.721	6	2	GO:0000966	BP	RNA 5'-end processing	9	O75691,Q7L0Y3
1	3	1	GO:0034471	BP	ncRNA 5'-end processing	10	O75691
1	3	1	GO:0000967	BP	rRNA 5'-end processing	11	O75691
1	3	1	GO:0000472	BP	endonucleolytic cleavage to generate mature 5'-end of SSU-rRNA from (SSU-rRNA, 5.8S rRNA, LSU-rRNA)	12	O75691
1.15e-66	454	62	GO:0006397	BP	mRNA processing	9	Q9NQ29,P51948,Q8IX12,P26368,Q96FV9,Q96MU7,Q9Y2W2,Q9NW64,Q92945,P35637,Q9P2N5,Q6P6C2,Q99459,P61218,Q13573,Q6PJT7,Q9UKV3,Q9H307,O43148,O43719,P08621,P17844,O95232,Q7KZ85,Q16630,P84103,P52298,P23246,O75940,P22626,P35269,Q9BTD8,O75937,Q14498,Q12849,P51946,P09651,Q9C0J8,Q09161,Q99590,Q8WVV9,Q7L014,Q9Y383,P38159,Q8N684,Q9NR56,Q00839,Q01081,P55265,Q01130,Q9H814,O75475,Q9UQ35,O95400,Q9BTL3,O43660,Q9BUQ8,…
1	9	2	GO:0098787	BP	mRNA cleavage involved in mRNA processing	10	P52298,Q09161
2.41e-11	83	12	GO:0031124	BP	mRNA 3'-end processing	10	P26368,Q6PJT7,Q16630,P84103,P52298,Q12849,Q9C0J8,Q09161,Q8N684,Q01081,Q01130,Q6PD62
0.00218	37	5	GO:0006378	BP	mRNA polyadenylation	11	Q6PJT7,Q16630,Q12849,Q9C0J8,Q6PD62
0.721	6	2	GO:0098789	BP	pre-mRNA cleavage required for polyadenylation	11	P52298,Q09161
1.08e-10	33	9	GO:0006370	BP	7-methylguanosine mRNA capping	10	P51948,P61218,O43148,P52298,P35269,P51946,Q09161,Q9BTL3,P13984
1	1	1	GO:0036031	BP	recruitment of mRNA capping enzyme to RNA polymerase II holoenzyme complex	11	Q9BTL3
1.87e-45	285	42	GO:0000398	BP	mRNA splicing, via spliceosome	10	Q9NQ29,Q8IX12,P26368,Q96MU7,Q9Y2W2,Q9NW64,P35637,Q99459,P61218,Q13573,Q9UKV3,Q9H307,O43719,P08621,P17844,O95232,P84103,P52298,P23246,P22626,P35269,Q9BTD8,O75937,P09651,Q09161,Q99590,Q7L014,Q9Y383,P38159,Q8N684,Q9NR56,Q00839,Q01081,Q01130,Q9H814,O75475,Q9UQ35,O95400,O43660,Q9BUQ8,Q13151,P13984
0.000108	41	6	GO:0000380	BP	alternative mRNA splicing, via spliceosome	11	P17844,P23246,P09651,P38159,Q9NR56,Q01130
2.13e-07	16	6	GO:0045292	BP	mRNA cis splicing, via spliceosome	11	Q9Y2W2,Q9NW64,P52298,Q09161,O75475,Q9BUQ8
0.00369	41	5	GO:0000387	BP	spliceosomal snRNP assembly	11	Q9NW64,P52298,Q09161,Q9H814,O95400
1	12	1	GO:0000244	BP	spliceosomal tri-snRNP complex assembly	12	O95400
1.93e-08	56	9	GO:0000245	BP	spliceosomal complex assembly	11	Q9NQ29,P26368,Q96MU7,O95232,Q99590,Q9Y383,Q9NR56,O75475,Q9BUQ8
1	1	1	GO:1903241	BP	U2-type prespliceosome assembly	12	P26368
9.52e-06	28	6	GO:0006376	BP	mRNA splice site selection	12	Q9NQ29,Q96MU7,O95232,Q9Y383,Q9NR56,O75475
1	6	1	GO:0000395	BP	mRNA 5'-splice site recognition	13	O75475
1	2	1	GO:0000354	BP	cis assembly of pre-catalytic spliceosome	12	Q9BUQ8
1	14	1	GO:0000963	BP	mitochondrial RNA processing	9	Q7L0Y3
1	5	1	GO:0090646	BP	mitochondrial tRNA processing	10	Q7L0Y3
1	8	1	GO:0070900	BP	mitochondrial tRNA modification	10	Q7L0Y3
1	2	1	GO:0000964	BP	mitochondrial RNA 5'-end processing	10	Q7L0Y3
0.369	398	9	GO:0034655	BP	nucleobase-containing compound catabolic process	6	Q92945,O43598,P52298,Q09161,P61221,Q9Y3B2,P09543,P07305,P07203
1	32	1	GO:0006308	BP	DNA catabolic process	7	P07305
1	23	1	GO:0000737	BP	DNA catabolic process, endonucleolytic	8	P07305
1	18	1	GO:0006309	BP	apoptotic DNA fragmentation	9	P07305
1	241	5	GO:0006401	BP	RNA catabolic process	7	Q92945,P52298,Q09161,P61221,Q9Y3B2
1	212	4	GO:0006402	BP	mRNA catabolic process	8	Q92945,P52298,Q09161,Q9Y3B2
1	196	3	GO:0000956	BP	nuclear-transcribed mRNA catabolic process	9	P52298,Q09161,Q9Y3B2
1	123	2	GO:0000184	BP	nuclear-transcribed mRNA catabolic process, nonsense-mediated decay	10	P52298,Q09161
1	32	1	GO:0000291	BP	nuclear-transcribed mRNA catabolic process, exonucleolytic	10	Q9Y3B2
1	67	1	GO:0000288	BP	nuclear-transcribed mRNA catabolic process, deadenylation-dependent decay	10	Q9Y3B2
1	30	1	GO:0043928	BP	exonucleolytic nuclear-transcribed mRNA catabolic process involved in deadenylation-dependent decay	11	Q9Y3B2
1	32	3	GO:0009225	BP	nucleotide-sugar metabolic process	6	O95394,Q96EK6,Q16222
0.0383	11	3	GO:0006047	BP	UDP-N-acetylglucosamine metabolic process	7	O95394,Q96EK6,Q16222
0.136	715	13	GO:0055086	BP	nucleobase-containing small molecule metabolic process	6	P31930,Q02218,P06576,O43598,Q16718,Q9HCC0,Q6XQN6,P25705,Q4G0N4,P52789,Q14558,P09543,P07203
1	71	1	GO:0009112	BP	nucleobase metabolic process	7	P07203
1	42	1	GO:0006144	BP	purine nucleobase metabolic process	8	P07203
0.0561	655	13	GO:0006753	BP	nucleoside phosphate metabolic process	7	P31930,Q02218,P06576,O43598,Q16718,Q9HCC0,Q6XQN6,P25705,Q4G0N4,P52789,Q14558,P09543,P07203
1	286	7	GO:0009123	BP	nucleoside monophosphate metabolic process	8	P31930,Q02218,P06576,O43598,Q16718,P25705,P52789
1	10	1	GO:0009162	BP	deoxyribonucleoside monophosphate metabolic process	9	O43598
1	263	6	GO:0009126	BP	purine nucleoside monophosphate metabolic process	9	P31930,Q02218,P06576,Q16718,P25705,P52789
1	274	6	GO:0009161	BP	ribonucleoside monophosphate metabolic process	9	P31930,Q02218,P06576,Q16718,P25705,P52789
1	262	6	GO:0009167	BP	purine ribonucleoside monophosphate metabolic process	10	P31930,Q02218,P06576,Q16718,P25705,P52789
1	37	1	GO:0033865	BP	nucleoside bisphosphate metabolic process	8	Q9HCC0
1	37	1	GO:0033875	BP	ribonucleoside bisphosphate metabolic process	9	Q9HCC0
1	37	1	GO:0034032	BP	purine nucleoside bisphosphate metabolic process	9	Q9HCC0
1	268	6	GO:0009141	BP	nucleoside triphosphate metabolic process	8	P31930,Q02218,P06576,Q16718,P25705,P52789
1	248	6	GO:0009144	BP	purine nucleoside triphosphate metabolic process	9	P31930,Q02218,P06576,Q16718,P25705,P52789
1	247	6	GO:0009199	BP	ribonucleoside triphosphate metabolic process	9	P31930,Q02218,P06576,Q16718,P25705,P52789
1	241	6	GO:0009205	BP	purine ribonucleoside triphosphate metabolic process	10	P31930,Q02218,P06576,Q16718,P25705,P52789
1	106	3	GO:1901292	BP	nucleoside phosphate catabolic process	8	O43598,P09543,P07203
1	7	1	GO:0009125	BP	nucleoside monophosphate catabolic process	9	O43598
1	2	1	GO:0009159	BP	deoxyribonucleoside monophosphate catabolic process	10	O43598
1	117	2	GO:0009132	BP	nucleoside diphosphate metabolic process	8	Q02218,P52789
1	94	2	GO:0009135	BP	purine nucleoside diphosphate metabolic process	9	Q02218,P52789
1	96	2	GO:0009185	BP	ribonucleoside diphosphate metabolic process	9	Q02218,P52789
1	94	2	GO:0009179	BP	purine ribonucleoside diphosphate metabolic process	10	Q02218,P52789
0.0503	648	13	GO:0009117	BP	nucleotide metabolic process	8	P31930,Q02218,P06576,O43598,Q16718,Q9HCC0,Q6XQN6,P25705,Q4G0N4,P52789,Q14558,P09543,P07203
1	129	4	GO:0019362	BP	pyridine nucleotide metabolic process	9	Q02218,Q6XQN6,Q4G0N4,P52789
1	1	1	GO:0046497	BP	nicotinate nucleotide metabolic process	10	Q6XQN6
1	129	4	GO:0046496	BP	nicotinamide nucleotide metabolic process	10	Q02218,Q6XQN6,Q4G0N4,P52789
1	36	1	GO:0006739	BP	NADP metabolic process	11	Q4G0N4
0.52	62	4	GO:0019674	BP	NAD metabolic process	11	Q02218,Q6XQN6,Q4G0N4,P52789
1	40	2	GO:0006734	BP	NADH metabolic process	12	Q02218,P52789
1	27	1	GO:0006735	BP	NADH regeneration	13	P52789
1	196	1	GO:0009187	BP	cyclic nucleotide metabolic process	9	P09543
1	95	2	GO:0046939	BP	nucleotide phosphorylation	9	Q02218,P52789
1	89	2	GO:0006165	BP	nucleoside diphosphate phosphorylation	10	Q02218,P52789
1	520	7	GO:0009259	BP	ribonucleotide metabolic process	9	P31930,Q02218,P06576,Q16718,Q9HCC0,P25705,P52789
1	526	8	GO:0006163	BP	purine nucleotide metabolic process	9	P31930,Q02218,P06576,Q16718,Q9HCC0,P25705,P52789,P07203
1	505	7	GO:0009150	BP	purine ribonucleotide metabolic process	10	P31930,Q02218,P06576,Q16718,Q9HCC0,P25705,P52789
1	99	2	GO:0009166	BP	nucleotide catabolic process	9	P09543,P07203
1	21	1	GO:0009214	BP	cyclic nucleotide catabolic process	10	P09543
1	49	1	GO:0006195	BP	purine nucleotide catabolic process	10	P07203
1	390	8	GO:0009116	BP	nucleoside metabolic process	7	P31930,Q02218,P06576,O43598,Q16718,Q9HCC0,P25705,P52789
1	366	7	GO:0009119	BP	ribonucleoside metabolic process	8	P31930,Q02218,P06576,Q16718,Q9HCC0,P25705,P52789
1	340	7	GO:0042278	BP	purine nucleoside metabolic process	8	P31930,Q02218,P06576,Q16718,Q9HCC0,P25705,P52789
1	337	7	GO:0046128	BP	purine ribonucleoside metabolic process	9	P31930,Q02218,P06576,Q16718,Q9HCC0,P25705,P52789
1	17	1	GO:0015936	BP	coenzyme A metabolic process	10	Q9HCC0
1	225	6	GO:0046034	BP	ATP metabolic process	10	P31930,Q02218,P06576,Q16718,P25705,P52789
1	98	2	GO:0006119	BP	oxidative phosphorylation	11	P31930,Q16718
1	76	2	GO:0042773	BP	ATP synthesis coupled electron transport	12	P31930,Q16718
1	75	2	GO:0042775	BP	mitochondrial ATP synthesis coupled electron transport	13	P31930,Q16718
1	11	1	GO:0006122	BP	mitochondrial electron transport, ubiquinol to cytochrome c	14	P31930
1	51	1	GO:0006120	BP	mitochondrial electron transport, NADH to ubiquinone	14	Q16718
1	79	2	GO:0046031	BP	ADP metabolic process	10	Q02218,P52789
1	71	2	GO:0006757	BP	ATP generation from ADP	11	Q02218,P52789
2.56e-55	6210	140	GO:0044249	BP	cellular biosynthetic process	4	P23511,O75223,Q9UIG0,O95394,P51948,P49959,Q8IX12,P26368,P04181,Q15717,Q13428,O43709,Q969G3,O75530,Q00325,Q15054,Q96FV9,P40939,Q9BXP5,Q92945,P35637,Q9Y5N6,Q5SRE5,Q99459,Q96RN5,P61218,Q92841,Q96EK6,Q13573,P27695,Q9HCK8,Q9H307,P78406,Q9NV56,O43148,O43719,Q8N1F7,P49711,P56270,O75822,P49005,Q9Y657,Q99567,P17844,Q7KZ85,P06576,O14519,P57740,P84103,P53999,O14776,P52298,P23246,Q16222,Q6PI48,O15446,Q15651,…
1	36	1	GO:0043094	BP	cellular metabolic compound salvage	5	Q6XQN6
6.87e-49	4378	114	GO:0018130	BP	heterocycle biosynthetic process	5	P23511,Q9UIG0,O95394,P51948,Q8IX12,P26368,P04181,Q13428,O43709,Q969G3,O75530,Q15054,Q96FV9,Q9BXP5,Q92945,P35637,Q5SRE5,Q99459,Q96RN5,P61218,Q92841,Q96EK6,Q13573,P27695,Q9HCK8,Q9H307,P78406,Q9NV56,O43148,O43719,Q8N1F7,P49711,P56270,P49005,Q9Y657,Q99567,P17844,Q7KZ85,P06576,P57740,P84103,P53999,O14776,P52298,P23246,Q16222,O15446,Q15651,Q9NRZ9,P42166,P22626,Q15014,Q32MZ4,P35269,P61244,P35658,P51532,…
1.06e-50	4934	122	GO:0044271	BP	cellular nitrogen compound biosynthetic process	5	P23511,O75223,Q9UIG0,O95394,P51948,Q8IX12,P26368,Q15717,Q13428,O43709,Q969G3,O75530,Q00325,Q15054,Q96FV9,Q9BXP5,Q92945,P35637,Q5SRE5,Q99459,Q96RN5,P61218,Q92841,Q96EK6,Q13573,P27695,Q9HCK8,Q9H307,P78406,Q9NV56,O43148,O43719,Q8N1F7,P49711,P56270,O75822,P49005,Q9Y657,Q99567,P17844,Q7KZ85,P06576,P57740,P84103,P53999,O14776,P52298,P23246,Q16222,Q6PI48,O15446,Q15651,Q9NRZ9,P42166,P22626,Q15014,Q32MZ4,…
0.00101	784	17	GO:0043604	BP	amide biosynthetic process	6	O75223,Q15717,Q00325,Q9BXP5,O75822,P52298,Q6PI48,P22626,Q12931,Q09161,O00622,P49458,O60841,P55265,P04843,P82979,Q9ULC4
0.00123	706	16	GO:0043043	BP	peptide biosynthetic process	7	O75223,Q15717,Q00325,Q9BXP5,O75822,P52298,Q6PI48,P22626,Q12931,Q09161,P49458,O60841,P55265,P04843,P82979,Q9ULC4
1	20	1	GO:0019184	BP	nonribosomal peptide biosynthetic process	8	O75223
1	23	2	GO:0072525	BP	pyridine-containing compound biosynthetic process	6	Q6XQN6,Q4G0N4
1	68	1	GO:0006809	BP	nitric oxide biosynthetic process	6	P00533
1	162	5	GO:0051188	BP	cofactor biosynthetic process	5	Q9Y305,O95573,Q6XQN6,Q4G0N4,Q9Y697
1	134	5	GO:0009108	BP	coenzyme biosynthetic process	6	Q9Y305,O95573,Q6XQN6,Q4G0N4,Q9Y697
1	6	1	GO:0032324	BP	molybdopterin cofactor biosynthetic process	6	Q9Y697
1	6	1	GO:0006777	BP	Mo-molybdopterin cofactor biosynthetic process	7	Q9Y697
1	217	5	GO:0044272	BP	sulfur compound biosynthetic process	5	O75223,Q9Y305,O95573,P21266,P08047
1	62	2	GO:0035384	BP	thioester biosynthetic process	6	Q9Y305,O95573
1	62	2	GO:0071616	BP	acyl-CoA biosynthetic process	7	Q9Y305,O95573
1	44	2	GO:0046949	BP	fatty-acyl-CoA biosynthetic process	8	Q9Y305,O95573
1	42	2	GO:0035338	BP	long-chain fatty-acyl-CoA biosynthetic process	9	Q9Y305,O95573
1	5	1	GO:0070814	BP	hydrogen sulfide biosynthetic process	6	P08047
1	32	2	GO:1901687	BP	glutathione derivative biosynthetic process	6	O75223,P21266
4.7e-47	4381	112	GO:0019438	BP	aromatic compound biosynthetic process	5	P23511,Q9UIG0,O95394,P51948,Q8IX12,P26368,Q13428,O43709,Q969G3,O75530,Q15054,Q96FV9,Q9BXP5,Q92945,P35637,Q5SRE5,Q99459,Q96RN5,P61218,Q92841,Q96EK6,Q13573,P27695,Q9HCK8,Q9H307,P78406,Q9NV56,O43148,O43719,Q8N1F7,P49711,P56270,P49005,Q9Y657,Q99567,P17844,Q7KZ85,P06576,P57740,P84103,P53999,O14776,P52298,P23246,Q16222,O15446,Q15651,Q9NRZ9,P42166,P22626,Q15014,Q32MZ4,P35269,P61244,P35658,P51532,O60832,…
9.31e-48	4310	112	GO:0034654	BP	nucleobase-containing compound biosynthetic process	6	P23511,Q9UIG0,O95394,P51948,Q8IX12,P26368,Q13428,O43709,Q969G3,O75530,Q15054,Q96FV9,Q9BXP5,Q92945,P35637,Q5SRE5,Q99459,Q96RN5,P61218,Q92841,Q96EK6,Q13573,P27695,Q9HCK8,Q9H307,P78406,Q9NV56,O43148,O43719,Q8N1F7,P49711,P56270,P49005,Q9Y657,Q99567,P17844,Q7KZ85,P06576,P57740,P84103,P53999,O14776,P52298,P23246,Q16222,O15446,Q15651,Q9NRZ9,P42166,P22626,Q15014,Q32MZ4,P35269,P61244,P35658,P51532,O60832,…
0.154	17	3	GO:0009226	BP	nucleotide-sugar biosynthetic process	7	O95394,Q96EK6,Q16222
0.00473	6	3	GO:0006048	BP	UDP-N-acetylglucosamine biosynthetic process	8	O95394,Q96EK6,Q16222
1	128	2	GO:0009163	BP	nucleoside biosynthetic process	7	P06576,P25705
1	118	2	GO:0042455	BP	ribonucleoside biosynthetic process	8	P06576,P25705
1	318	5	GO:1901293	BP	nucleoside phosphate biosynthetic process	7	P06576,Q6XQN6,P25705,Q4G0N4,Q14558
1	91	2	GO:0009124	BP	nucleoside monophosphate biosynthetic process	8	P06576,P25705
1	71	2	GO:0009127	BP	purine nucleoside monophosphate biosynthetic process	9	P06576,P25705
1	83	2	GO:0009156	BP	ribonucleoside monophosphate biosynthetic process	9	P06576,P25705
1	71	2	GO:0009168	BP	purine ribonucleoside monophosphate biosynthetic process	10	P06576,P25705
1	313	5	GO:0009165	BP	nucleotide biosynthetic process	8	P06576,Q6XQN6,P25705,Q4G0N4,Q14558
1	13	1	GO:0043173	BP	nucleotide salvage	9	Q6XQN6
1	264	2	GO:0009260	BP	ribonucleotide biosynthetic process	9	P06576,P25705
1	19	2	GO:0019363	BP	pyridine nucleotide biosynthetic process	9	Q6XQN6,Q4G0N4
1	19	2	GO:0019359	BP	nicotinamide nucleotide biosynthetic process	10	Q6XQN6,Q4G0N4
1	16	1	GO:0009435	BP	NAD biosynthetic process	11	Q6XQN6
1	3	1	GO:0006741	BP	NADP biosynthetic process	11	Q4G0N4
1	1	1	GO:0019365	BP	pyridine nucleotide salvage	10	Q6XQN6
1	1	1	GO:0019357	BP	nicotinate nucleotide biosynthetic process	10	Q6XQN6
1	1	1	GO:0019358	BP	nicotinate nucleotide salvage	11	Q6XQN6
1	74	2	GO:0009142	BP	nucleoside triphosphate biosynthetic process	8	P06576,P25705
1	57	2	GO:0009145	BP	purine nucleoside triphosphate biosynthetic process	9	P06576,P25705
1	62	2	GO:0009201	BP	ribonucleoside triphosphate biosynthetic process	9	P06576,P25705
1	56	2	GO:0009206	BP	purine ribonucleoside triphosphate biosynthetic process	10	P06576,P25705
4.14e-41	3903	100	GO:0032774	BP	RNA biosynthetic process	7	P23511,Q9UIG0,P51948,Q8IX12,P26368,Q13428,O43709,Q969G3,O75530,Q96FV9,Q9BXP5,Q92945,P35637,Q5SRE5,Q99459,Q96RN5,P61218,Q92841,Q13573,P27695,Q9HCK8,Q9H307,P78406,Q9NV56,O43148,O43719,Q8N1F7,P49711,P56270,Q9Y657,Q99567,P17844,Q7KZ85,P57740,P84103,P53999,O14776,P52298,P23246,O15446,Q15651,Q9NRZ9,P42166,P22626,Q15014,Q32MZ4,P35269,P61244,P35658,P51532,Q14498,Q9H1D9,P51946,P10606,Q09161,Q9GZS1,P17096,…
4.18e-37	3781	94	GO:0097659	BP	nucleic acid-templated transcription	8	P23511,Q9UIG0,P51948,Q8IX12,P26368,Q13428,O43709,Q969G3,O75530,Q96FV9,Q9BXP5,Q92945,P35637,Q99459,Q96RN5,P61218,Q92841,Q13573,P27695,Q9HCK8,Q9H307,Q9NV56,O43148,O43719,P49711,P56270,Q9Y657,P17844,Q7KZ85,P57740,P84103,P53999,O14776,P52298,P23246,O15446,Q15651,Q9NRZ9,P42166,P22626,Q15014,Q32MZ4,P35269,P61244,P51532,Q14498,Q9H1D9,P51946,P10606,Q09161,Q9GZS1,P17096,Q9NWH9,P09038,Q8TAQ2,Q8IZL8,O00622,…
1	271	2	GO:0072522	BP	purine-containing compound biosynthetic process	6	P06576,P25705
1	99	2	GO:0042451	BP	purine nucleoside biosynthetic process	7	P06576,P25705
1	99	2	GO:0046129	BP	purine ribonucleoside biosynthetic process	8	P06576,P25705
1	257	2	GO:0006164	BP	purine nucleotide biosynthetic process	7	P06576,P25705
1	251	2	GO:0009152	BP	purine ribonucleotide biosynthetic process	8	P06576,P25705
1	45	2	GO:0006754	BP	ATP biosynthetic process	9	P06576,P25705
1	27	2	GO:0015986	BP	ATP synthesis coupled proton transport	10	P06576,P25705
1	19	2	GO:0042776	BP	mitochondrial ATP synthesis coupled proton transport	11	P06576,P25705
1.84e-45	5123	118	GO:0034645	BP	cellular macromolecule biosynthetic process	5	P23511,Q9UIG0,O95394,P51948,P49959,Q8IX12,P26368,Q15717,Q13428,O43709,Q969G3,O75530,Q00325,Q15054,Q96FV9,Q9BXP5,Q92945,Q9Y5N6,Q99459,Q96RN5,P61218,Q92841,Q96EK6,Q13573,P27695,Q9HCK8,Q9H307,Q9NV56,O43148,O43719,P49711,P56270,O75822,P49005,Q9Y657,P17844,Q7KZ85,O14519,P57740,P84103,P53999,O14776,P52298,P23246,Q16222,Q6PI48,O15446,Q15651,Q9NRZ9,P42166,P22626,Q15014,Q32MZ4,P35269,P61244,Q12931,P51532,…
1	11	1	GO:0042541	BP	hemoglobin biosynthetic process	6	Q86U70
1	498	6	GO:0009101	BP	glycoprotein biosynthetic process	6	O95394,Q96EK6,Q16222,Q10471,P04843,P08174
1	424	6	GO:0006486	BP	protein glycosylation	7	O95394,Q96EK6,Q16222,Q10471,P04843,P08174
1	260	5	GO:0006487	BP	protein N-linked glycosylation	8	O95394,Q96EK6,Q16222,P04843,P08174
1	248	5	GO:0018279	BP	protein N-linked glycosylation via asparagine	9	O95394,Q96EK6,Q16222,P04843,P08174
1	101	2	GO:0006493	BP	protein O-linked glycosylation	8	O95394,Q10471
1	58	1	GO:0016266	BP	O-glycan processing	9	Q10471
1	4	1	GO:0018243	BP	protein O-linked glycosylation via threonine	9	Q10471
1	3	1	GO:0018242	BP	protein O-linked glycosylation via serine	9	Q10471
3.94e-08	338	16	GO:0006260	BP	DNA replication	6	P49959,Q15054,Q96FV9,Q9Y5N6,P27695,P49005,O14519,Q9NVN8,O60832,Q9UBD5,P09651,P17096,P00533,Q00839,Q13112,Q15004
0.0193	57	5	GO:0006278	BP	RNA-dependent DNA replication	7	P49959,Q9NVN8,O60832,P09651,Q00839
0.0148	54	5	GO:0007004	BP	telomere maintenance via telomerase	8	P49959,Q9NVN8,O60832,P09651,Q00839
0.000522	127	8	GO:0006261	BP	DNA-dependent DNA replication	7	P49959,Q15054,Q96FV9,Q9Y5N6,P27695,P49005,O14519,P17096
1	24	1	GO:0045005	BP	DNA-dependent DNA replication maintenance of fidelity	8	Q96FV9
1	21	1	GO:0031297	BP	replication fork processing	9	Q96FV9
0.225	50	4	GO:0044786	BP	cell cycle DNA replication	8	P49959,Q15054,P27695,P49005
1	9	1	GO:0042023	BP	DNA endoreduplication	9	P49959
1	41	3	GO:0033260	BP	nuclear DNA replication	9	Q15054,P27695,P49005
0.64	27	3	GO:0032201	BP	telomere maintenance via semi-conservative replication	10	Q15054,P27695,P49005
1	8	1	GO:0006268	BP	DNA unwinding involved in DNA replication	8	P17096
1	38	3	GO:0006271	BP	DNA strand elongation involved in DNA replication	7	Q15054,P27695,P49005
0.00366	677	15	GO:0006412	BP	translation	6	Q15717,Q00325,Q9BXP5,O75822,P52298,Q6PI48,P22626,Q12931,Q09161,P49458,O60841,P55265,P04843,P82979,Q9ULC4
1	41	2	GO:0002181	BP	cytoplasmic translation	7	O75822,Q9ULC4
1	118	1	GO:0032543	BP	mitochondrial translation	7	Q6PI48
1	219	1	GO:0006414	BP	translational elongation	6	P49458
1	153	5	GO:0071897	BP	DNA biosynthetic process	6	Q15054,P49005,O60832,Q15004,P35232
1	14	1	GO:0000731	BP	DNA synthesis involved in DNA repair	7	Q15054
1	49	3	GO:0019985	BP	translesion synthesis	7	Q15054,P49005,Q15004
2.12e-36	3766	93	GO:0006351	BP	transcription, DNA-templated	6	P23511,Q9UIG0,P51948,Q8IX12,P26368,Q13428,O43709,Q969G3,O75530,Q96FV9,Q9BXP5,Q92945,Q99459,Q96RN5,P61218,Q92841,Q13573,P27695,Q9HCK8,Q9H307,Q9NV56,O43148,O43719,P49711,P56270,Q9Y657,P17844,Q7KZ85,P57740,P84103,P53999,O14776,P52298,P23246,O15446,Q15651,Q9NRZ9,P42166,P22626,Q15014,Q32MZ4,P35269,P61244,P51532,Q14498,Q9H1D9,P51946,P10606,Q09161,Q9GZS1,P17096,Q9NWH9,P09038,Q8TAQ2,Q8IZL8,O00622,Q8WXI9,…
0.00326	40	5	GO:0098781	BP	ncRNA transcription	7	Q13428,Q9Y657,O15446,P51532,Q9GZS1
0.000734	30	5	GO:0009303	BP	rRNA transcription	8	Q13428,Q9Y657,O15446,P51532,Q9GZS1
5.55e-24	2036	58	GO:0006366	BP	transcription from RNA polymerase II promoter	7	P23511,P51948,P26368,Q969G3,O75530,Q96RN5,P61218,Q92841,Q13573,Q9HCK8,Q9NV56,O43148,O43719,P49711,P56270,P17844,Q7KZ85,P84103,P53999,O14776,P52298,P23246,Q15651,P22626,Q15014,Q32MZ4,P35269,P61244,P51532,P51946,P10606,Q09161,P17096,P09038,Q8TAQ2,Q8IZL8,O00622,Q8WXI9,P00533,P38159,Q8N684,Q01081,P02545,Q01130,Q96AE4,Q9Y2X9,O75475,Q9NR30,P35232,Q86YP4,P17544,Q9H2U1,Q9H3P2,P08047,P13984,Q86U70,Q6PD62,…
1	12	1	GO:0061614	BP	pri-miRNA transcription from RNA polymerase II promoter	8	P51532
1	1	1	GO:0100057	BP	regulation of phenotypic switching by transcription from RNA polymerase II promoter	8	P08047
0.351	56	4	GO:0006383	BP	transcription from RNA polymerase III promoter	7	P61218,Q9HCK8,Q9H1D9,Q9BUI4
2.02e-17	134	18	GO:0006354	BP	DNA-templated transcription, elongation	7	P51948,Q96FV9,P61218,O43719,Q7KZ85,P52298,O15446,P35269,Q9H1D9,P51946,Q09161,Q9GZS1,Q9H3P2,Q9BUI4,P13984,Q86U70,Q6PD62,P05114
0.185	18	3	GO:0006385	BP	transcription elongation from RNA polymerase III promoter	8	P61218,Q9H1D9,Q9BUI4
1.04e-07	95	10	GO:0006368	BP	transcription elongation from RNA polymerase II promoter	8	P51948,P61218,Q7KZ85,P52298,P35269,P51946,Q09161,Q9H3P2,P13984,Q6PD62
1	20	1	GO:0009299	BP	mRNA transcription	7	P17844
7.84e-17	96	16	GO:0006353	BP	DNA-templated transcription, termination	7	P51948,P26368,P61218,P56270,P84103,P52298,O15446,Q9H1D9,P51946,Q09161,Q9GZS1,Q8N684,Q01081,Q01130,Q6NZI2,Q9BUI4
0.185	18	3	GO:0006386	BP	termination of RNA polymerase III transcription	8	P61218,Q9H1D9,Q9BUI4
1.72e-07	47	8	GO:0006369	BP	termination of RNA polymerase II transcription	8	P26368,P56270,P84103,P52298,Q09161,Q8N684,Q01081,Q01130
2.01e-05	321	13	GO:0006352	BP	DNA-templated transcription, initiation	7	P51948,Q96RN5,P61218,Q13573,P56270,O15446,P35269,P51946,P10606,Q9GZS1,Q6NZI2,P08047,P13984
1	25	2	GO:0070897	BP	DNA-templated transcriptional preinitiation complex assembly	8	Q9GZS1,P13984
0.00311	279	10	GO:0006367	BP	transcription initiation from RNA polymerase II promoter	8	P51948,Q96RN5,P61218,Q13573,P56270,P35269,P51946,P10606,P08047,P13984
1	23	1	GO:0051123	BP	RNA polymerase II transcriptional preinitiation complex assembly	9	P13984
1.15e-06	59	8	GO:0006360	BP	transcription from RNA polymerase I promoter	7	P51948,Q13428,P61218,O15446,P51532,P51946,Q9GZS1,Q6NZI2
1.84e-05	31	6	GO:0006363	BP	termination of RNA polymerase I transcription	8	P51948,P61218,O15446,P51946,Q9GZS1,Q6NZI2
3.32e-05	34	6	GO:0006361	BP	transcription initiation from RNA polymerase I promoter	8	P51948,P61218,O15446,P51946,Q9GZS1,Q6NZI2
1	2	1	GO:0001188	BP	RNA polymerase I transcriptional preinitiation complex assembly	9	Q9GZS1
0.000872	31	5	GO:0006362	BP	transcription elongation from RNA polymerase I promoter	8	P51948,P61218,O15446,P51946,Q9GZS1
0.0509	12	3	GO:0042790	BP	transcription of nuclear large rRNA transcript from RNA polymerase I promoter	8	Q13428,P51532,Q9GZS1
1	2	1	GO:0001180	BP	transcription initiation from RNA polymerase I promoter for nuclear large rRNA transcript	9	Q9GZS1
1	2	1	GO:0001189	BP	RNA polymerase I transcriptional preinitiation complex assembly at the promoter for the nuclear large rRNA transcript	10	Q9GZS1
1	320	7	GO:0006575	BP	cellular modified amino acid metabolic process	4	O75223,O15460,P06732,P13674,P21266,P34897,P07203
1	56	2	GO:0042398	BP	cellular modified amino acid biosynthetic process	5	O75223,P06732
1	1	1	GO:0006599	BP	phosphagen metabolic process	5	P06732
1	1	1	GO:0006603	BP	phosphocreatine metabolic process	6	P06732
1	1	1	GO:0042396	BP	phosphagen biosynthetic process	6	P06732
1	1	1	GO:0046314	BP	phosphocreatine biosynthetic process	7	P06732
1	59	3	GO:0006749	BP	glutathione metabolic process	5	O75223,P21266,P07203
1	19	1	GO:0006750	BP	glutathione biosynthetic process	6	O75223
1	292	3	GO:0044262	BP	cellular carbohydrate metabolic process	4	P49792,P52789,P17706
1	22	1	GO:0046835	BP	carbohydrate phosphorylation	5	P52789
1	85	1	GO:0006081	BP	cellular aldehyde metabolic process	4	Q02218
1	35	1	GO:0006730	BP	one-carbon metabolic process	4	P34897
1	10	1	GO:0046950	BP	cellular ketone body metabolic process	4	P55809
1	4	1	GO:0046952	BP	ketone body catabolic process	5	P55809
0.000175	1246	23	GO:0006082	BP	organic acid metabolic process	4	O75390,P04181,O15460,P31040,P40939,Q16698,P06732,Q02218,Q9UNW1,P50416,Q6PI48,P13674,O95573,P30084,P61289,Q9HCC0,P15586,P00367,P52789,P42765,P34897,P07203,Q9Y697
0.000139	1230	23	GO:0043436	BP	oxoacid metabolic process	5	O75390,P04181,O15460,P31040,P40939,Q16698,P06732,Q02218,Q9UNW1,P50416,Q6PI48,P13674,O95573,P30084,P61289,Q9HCC0,P15586,P00367,P52789,P42765,P34897,P07203,Q9Y697
0.000409	1106	21	GO:0019752	BP	carboxylic acid metabolic process	6	O75390,P04181,O15460,P31040,P40939,Q16698,P06732,Q02218,P50416,Q6PI48,P13674,O95573,P30084,P61289,Q9HCC0,P00367,P52789,P42765,P34897,P07203,Q9Y697
0.0756	38	4	GO:0072350	BP	tricarboxylic acid metabolic process	7	O75390,P31040,Q02218,P00367
1	34	3	GO:0006101	BP	citrate metabolic process	8	O75390,P31040,Q02218
0.879	30	3	GO:0006099	BP	tricarboxylic acid cycle	9	O75390,P31040,Q02218
0.352	104	5	GO:0043648	BP	dicarboxylic acid metabolic process	7	P04181,P31040,Q02218,P00367,P34897
1	20	1	GO:0006103	BP	2-oxoglutarate metabolic process	8	Q02218
1	10	1	GO:0006105	BP	succinate metabolic process	8	P31040
0.128	612	12	GO:0032787	BP	monocarboxylic acid metabolic process	7	O15460,P40939,Q16698,Q02218,P50416,P13674,O95573,P30084,Q9HCC0,P52789,P42765,P07203
1	105	2	GO:0006090	BP	pyruvate metabolic process	8	Q02218,P52789
1	27	1	GO:0061718	BP	glucose catabolic process to pyruvate	9	P52789
1	70	2	GO:0006096	BP	glycolytic process	9	Q02218,P52789
1	27	1	GO:0061615	BP	glycolytic process through fructose-6-phosphate	10	P52789
1	27	1	GO:0061620	BP	glycolytic process through glucose-6-phosphate	11	P52789
1	27	1	GO:0061621	BP	canonical glycolysis	12	P52789
1	26	1	GO:0046487	BP	glyoxylate metabolic process	8	Q02218
1	13	1	GO:0009437	BP	carnitine metabolic process	8	P50416
1	14	1	GO:0006768	BP	biotin metabolic process	8	Q9HCC0
1	106	1	GO:0006690	BP	icosanoid metabolic process	7	P07203
0.127	518	11	GO:0006520	BP	cellular amino acid metabolic process	7	P04181,O15460,P06732,Q02218,Q6PI48,P13674,P61289,Q9HCC0,P00367,P34897,Q9Y697
0.794	351	8	GO:1901605	BP	alpha-amino acid metabolic process	8	P04181,O15460,P06732,Q02218,P13674,Q9HCC0,P00367,P34897
1	49	1	GO:0009066	BP	aspartate family amino acid metabolic process	9	Q02218
1	13	1	GO:0006553	BP	lysine metabolic process	10	Q02218
1	72	2	GO:0009064	BP	glutamine family amino acid metabolic process	9	P04181,P00367
1	25	1	GO:0006541	BP	glutamine metabolic process	10	P00367
1	20	1	GO:0006525	BP	arginine metabolic process	10	P04181
1	32	2	GO:0006536	BP	glutamate metabolic process	10	P04181,P00367
1	11	1	GO:0006560	BP	proline metabolic process	10	P04181
1	127	1	GO:0009069	BP	serine family amino acid metabolic process	9	P34897
1	9	1	GO:0006563	BP	L-serine metabolic process	10	P34897
1	16	1	GO:0006544	BP	glycine metabolic process	10	P34897
1	11	1	GO:0006600	BP	creatine metabolic process	9	P06732
1	13	2	GO:0019471	BP	4-hydroxyproline metabolic process	9	O15460,P13674
0.721	6	2	GO:0018401	BP	peptidyl-proline hydroxylation to 4-hydroxy-L-proline	10	O15460,P13674
1	27	1	GO:0006760	BP	folic acid-containing compound metabolic process	9	P34897
1	19	1	GO:0046653	BP	tetrahydrofolate metabolic process	10	P34897
1	10	1	GO:0035999	BP	tetrahydrofolate interconversion	11	P34897
1	13	1	GO:0046655	BP	folic acid metabolic process	10	P34897
1	51	1	GO:0043038	BP	amino acid activation	8	Q6PI48
1	51	1	GO:0043039	BP	tRNA aminoacylation	9	Q6PI48
1	48	1	GO:0006418	BP	tRNA aminoacylation for protein translation	10	Q6PI48
1	3	1	GO:0006421	BP	asparaginyl-tRNA aminoacylation	11	Q6PI48
1	5	1	GO:0070127	BP	tRNA aminoacylation for mitochondrial protein translation	11	Q6PI48
1	1	1	GO:0070145	BP	mitochondrial asparaginyl-tRNA aminoacylation	12	Q6PI48
1	27	1	GO:0009081	BP	branched-chain amino acid metabolic process	8	Q9HCC0
1	6	1	GO:0006551	BP	leucine metabolic process	9	Q9HCC0
1	45	1	GO:0000096	BP	sulfur amino acid metabolic process	8	Q9Y697
1	6	1	GO:0006797	BP	polyphosphate metabolic process	6	Q9UNW1
1	33	1	GO:0042339	BP	keratan sulfate metabolic process	6	P15586
1	12	1	GO:0042340	BP	keratan sulfate catabolic process	7	P15586
0.0445	231	8	GO:0016054	BP	organic acid catabolic process	5	P04181,P40939,Q16698,Q02218,P50416,P30084,Q9HCC0,P00367
0.0445	231	8	GO:0046395	BP	carboxylic acid catabolic process	6	P04181,P40939,Q16698,Q02218,P50416,P30084,Q9HCC0,P00367
1	111	4	GO:0072329	BP	monocarboxylic acid catabolic process	7	P40939,Q16698,P50416,P30084
1	16	1	GO:0043649	BP	dicarboxylic acid catabolic process	7	P00367
1	123	4	GO:0009063	BP	cellular amino acid catabolic process	7	P04181,Q02218,Q9HCC0,P00367
1	99	4	GO:1901606	BP	alpha-amino acid catabolic process	8	P04181,Q02218,Q9HCC0,P00367
1	25	2	GO:0009065	BP	glutamine family amino acid catabolic process	9	P04181,P00367
1	10	1	GO:0006527	BP	arginine catabolic process	10	P04181
1	1	1	GO:0019493	BP	arginine catabolic process to proline	11	P04181
1	1	1	GO:0010121	BP	arginine catabolic process to proline via ornithine	12	P04181
1	1	1	GO:0019544	BP	arginine catabolic process to glutamate	11	P04181
1	7	1	GO:0006538	BP	glutamate catabolic process	10	P00367
1	18	1	GO:0009068	BP	aspartate family amino acid catabolic process	9	Q02218
1	12	1	GO:0006554	BP	lysine catabolic process	10	Q02218
1	24	1	GO:0009083	BP	branched-chain amino acid catabolic process	8	Q9HCC0
1	5	1	GO:0006552	BP	leucine catabolic process	9	Q9HCC0
1	311	4	GO:0016053	BP	organic acid biosynthetic process	5	P04181,O95573,P00367,P34897
1	311	4	GO:0046394	BP	carboxylic acid biosynthetic process	6	P04181,O95573,P00367,P34897
1	218	1	GO:0072330	BP	monocarboxylic acid biosynthetic process	7	O95573
1	14	1	GO:0043650	BP	dicarboxylic acid biosynthetic process	7	P00367
1	91	3	GO:0008652	BP	cellular amino acid biosynthetic process	7	P04181,P00367,P34897
1	76	3	GO:1901607	BP	alpha-amino acid biosynthetic process	8	P04181,P00367,P34897
1	22	2	GO:0009084	BP	glutamine family amino acid biosynthetic process	9	P04181,P00367
1	6	1	GO:0006537	BP	glutamate biosynthetic process	10	P00367
1	8	1	GO:0006561	BP	proline biosynthetic process	10	P04181
1	5	1	GO:0055129	BP	L-proline biosynthetic process	11	P04181
1	16	1	GO:0009070	BP	serine family amino acid biosynthetic process	9	P34897
1	6	1	GO:0006545	BP	glycine biosynthetic process	10	P34897
1	2	1	GO:0019264	BP	glycine biosynthetic process from serine	11	P34897
1	4	1	GO:0006564	BP	L-serine biosynthetic process	10	P34897
1	272	5	GO:0042180	BP	cellular ketone metabolic process	4	P55809,P50416,P61289,P49792,P17706
1	11	1	GO:0042182	BP	ketone catabolic process	5	P55809
1	192	2	GO:0006805	BP	xenobiotic metabolic process	4	O75223,P21266
1	11	1	GO:0042178	BP	xenobiotic catabolic process	5	P21266
0.637	1066	15	GO:0044255	BP	cellular lipid metabolic process	4	O95394,P55809,P40939,Q96EK6,Q16698,P50416,Q16222,Q9Y305,O95573,P30084,P09038,O00622,Q99541,P42765,P07203
1	195	1	GO:0006643	BP	membrane lipid metabolic process	5	O00622
1	126	1	GO:0046467	BP	membrane lipid biosynthetic process	6	O00622
1	147	1	GO:0006665	BP	sphingolipid metabolic process	6	O00622
1	83	1	GO:0006672	BP	ceramide metabolic process	7	O00622
1	88	1	GO:0030148	BP	sphingolipid biosynthetic process	7	O00622
1	52	1	GO:0046513	BP	ceramide biosynthetic process	8	O00622
1	163	4	GO:0006638	BP	neutral lipid metabolic process	5	P50416,Q9Y305,O95573,P07203
1	88	2	GO:0046460	BP	neutral lipid biosynthetic process	6	Q9Y305,O95573
1	195	4	GO:0030258	BP	lipid modification	5	P40939,Q16698,P50416,P30084
1	98	4	GO:0034440	BP	lipid oxidation	6	P40939,Q16698,P50416,P30084
1	394	6	GO:0046486	BP	glycerolipid metabolic process	5	P40939,P50416,Q9Y305,O95573,P09038,P07203
1	278	4	GO:0045017	BP	glycerolipid biosynthetic process	6	P40939,Q9Y305,O95573,P09038
1	162	4	GO:0006639	BP	acylglycerol metabolic process	6	P50416,Q9Y305,O95573,P07203
1	88	2	GO:0046463	BP	acylglycerol biosynthetic process	7	Q9Y305,O95573
1	153	4	GO:0006641	BP	triglyceride metabolic process	7	P50416,Q9Y305,O95573,P07203
1	86	2	GO:0019432	BP	triglyceride biosynthetic process	8	Q9Y305,O95573
1	382	3	GO:0006644	BP	phospholipid metabolic process	5	P40939,O95573,P09038
1	273	3	GO:0006650	BP	glycerophospholipid metabolic process	6	P40939,O95573,P09038
1	37	1	GO:0046471	BP	phosphatidylglycerol metabolic process	7	P40939
1	15	1	GO:0032048	BP	cardiolipin metabolic process	8	P40939
1	7	1	GO:0035965	BP	cardiolipin acyl-chain remodeling	9	P40939
1	151	1	GO:0046488	BP	phosphatidylinositol metabolic process	7	P09038
1	69	1	GO:0046470	BP	phosphatidylcholine metabolic process	7	O95573
1	243	3	GO:0008654	BP	phospholipid biosynthetic process	6	P40939,O95573,P09038
1	211	3	GO:0046474	BP	glycerophospholipid biosynthetic process	7	P40939,O95573,P09038
1	100	1	GO:0006661	BP	phosphatidylinositol biosynthetic process	8	P09038
1	29	1	GO:0006656	BP	phosphatidylcholine biosynthetic process	8	O95573
1	375	7	GO:0006631	BP	fatty acid metabolic process	5	P40939,Q16698,P50416,O95573,P30084,P42765,P07203
1	121	1	GO:0033559	BP	unsaturated fatty acid metabolic process	6	P07203
1	105	3	GO:0001676	BP	long-chain fatty acid metabolic process	6	P50416,O95573,P07203
1	68	1	GO:0019369	BP	arachidonic acid metabolic process	7	P07203
1	13	1	GO:0019372	BP	lipoxygenase pathway	6	P07203
1	96	4	GO:0019395	BP	fatty acid oxidation	6	P40939,Q16698,P50416,P30084
1	153	1	GO:0006633	BP	fatty acid biosynthetic process	6	O95573
1	187	4	GO:0044242	BP	cellular lipid catabolic process	5	P40939,Q16698,P50416,P30084
1	88	4	GO:0009062	BP	fatty acid catabolic process	6	P40939,Q16698,P50416,P30084
0.829	70	4	GO:0006635	BP	fatty acid beta-oxidation	7	P40939,Q16698,P50416,P30084
1	74	3	GO:0006490	BP	oligosaccharide-lipid intermediate biosynthetic process	5	O95394,Q96EK6,Q16222
1	74	3	GO:0006488	BP	dolichol-linked oligosaccharide biosynthetic process	6	O95394,Q96EK6,Q16222
1	273	5	GO:0006413	BP	translational initiation	4	O75822,P52298,Q09161,O60841,Q9ULC4
1	12	1	GO:0002183	BP	cytoplasmic translational initiation	5	Q9ULC4
1	8	1	GO:0002190	BP	cap-independent translational initiation	6	Q9ULC4
1	5	1	GO:0002192	BP	IRES-dependent translational initiation	7	Q9ULC4
1	21	2	GO:0001731	BP	formation of translation preinitiation complex	5	O75822,Q9ULC4
9.3e-19	7212	99	GO:0032501	BP	multicellular organismal process	2	P23511,P53701,Q9NQ29,Q9UIG0,Q9NQW6,O95394,P51948,P49959,Q13642,Q14126,P04181,Q9BV38,Q15717,Q13428,P31040,Q969G3,O75530,Q96FV9,P55809,Q8IWX8,Q9BXP5,P30086,Q6P6C2,O00161,Q96RN5,P61218,Q92841,Q96EK6,Q13573,Q9UKV3,Q9HCK8,Q14155,Q02218,Q9Y657,Q9UNW1,P17844,Q7KZ85,P06576,P07339,Q9NRZ9,P54278,O95573,P16083,Q32MZ4,P61244,O60220,P51532,O43852,P61289,Q12849,Q9H1D9,P21266,P10606,Q9C0J8,Q9NZM1,P09038,Q8TAQ2,…
1	2065	7	GO:0003008	BP	system process	3	Q14126,P04181,P16083,Q9NZM1,P00533,Q14643,P07203
1	398	2	GO:0003012	BP	muscle system process	4	Q14126,Q9NZM1
1	328	2	GO:0006936	BP	muscle contraction	5	Q14126,Q9NZM1
1	150	1	GO:0006941	BP	striated muscle contraction	6	Q14126
1	521	4	GO:0003013	BP	circulatory system process	4	Q14126,Q9NZM1,Q14643,P07203
1	175	1	GO:0003018	BP	vascular process in circulatory system	5	P07203
1	265	3	GO:0003015	BP	heart process	5	Q14126,Q14643,P07203
1	518	4	GO:0008015	BP	blood circulation	5	Q14126,Q9NZM1,Q14643,P07203
1	263	3	GO:0060047	BP	heart contraction	6	Q14126,Q14643,P07203
1	114	1	GO:0060048	BP	cardiac muscle contraction	7	Q14126
1	46	1	GO:0086003	BP	cardiac muscle cell contraction	8	Q14126
1	33	1	GO:0086002	BP	cardiac muscle cell action potential involved in contraction	9	Q14126
1	24	1	GO:0086005	BP	ventricular cardiac muscle cell action potential	10	Q14126
1	151	1	GO:0050880	BP	regulation of blood vessel size	6	P07203
1	74	1	GO:0042311	BP	vasodilation	7	P07203
1	1347	4	GO:0050877	BP	neurological system process	4	P04181,P16083,P00533,P07203
1	274	2	GO:0050890	BP	cognition	5	P16083,P00533
1	995	2	GO:0007600	BP	sensory perception	5	P04181,P07203
1	215	1	GO:0050953	BP	sensory perception of light stimulus	6	P04181
1	212	1	GO:0007601	BP	visual perception	7	P04181
1	164	1	GO:0050954	BP	sensory perception of mechanical stimulus	6	P07203
1	147	1	GO:0007605	BP	sensory perception of sound	7	P07203
2.71e-21	6175	95	GO:0044707	BP	single-multicellular organism process	3	P23511,P53701,Q9NQ29,Q9UIG0,Q9NQW6,O95394,P51948,P49959,Q13642,Q14126,Q9BV38,Q15717,Q13428,P31040,Q969G3,O75530,Q96FV9,P55809,Q8IWX8,Q9BXP5,P30086,O00161,Q96RN5,P61218,Q92841,Q96EK6,Q13573,Q9UKV3,Q9HCK8,Q14155,Q02218,Q9Y657,Q9UNW1,P17844,Q7KZ85,P06576,P07339,Q9NRZ9,P54278,O95573,P16083,Q32MZ4,P61244,O60220,P51532,O43852,P61289,Q12849,Q9H1D9,P21266,P10606,P09038,Q8TAQ2,Q00610,O00622,Q99661,P10809,…
1	109	3	GO:0042303	BP	molting cycle	4	P00533,Q6YHK3,Q86U70
1	109	3	GO:0042633	BP	hair cycle	5	P00533,Q6YHK3,Q86U70
1	228	5	GO:0090130	BP	tissue migration	4	Q9NQW6,P09038,P25815,P07203,O75340
1	223	5	GO:0090132	BP	epithelium migration	5	Q9NQW6,P09038,P25815,P07203,O75340
1	220	5	GO:0010631	BP	epithelial cell migration	6	Q9NQW6,P09038,P25815,P07203,O75340
1	152	4	GO:0043542	BP	endothelial cell migration	7	P09038,P25815,P07203,O75340
1	72	2	GO:0043534	BP	blood vessel endothelial cell migration	8	P09038,P07203
1	25	1	GO:0035767	BP	endothelial cell chemotaxis	8	P09038
1	7	1	GO:0035768	BP	endothelial cell chemotaxis to fibroblast growth factor	9	P09038
1	2	1	GO:0090521	BP	glomerular visceral epithelial cell migration	7	Q9NQW6
1	50	1	GO:0050879	BP	multicellular organismal movement	4	Q14643
1	50	1	GO:0050881	BP	musculoskeletal movement	5	Q14643
1	5	1	GO:0050882	BP	voluntary musculoskeletal movement	6	Q14643
1	90	1	GO:0032941	BP	secretion by tissue	4	P52789
1	189	2	GO:0035637	BP	multicellular organismal signaling	4	Q14126,Q14643
1	88	3	GO:0022404	BP	molting cycle process	4	P00533,Q6YHK3,Q86U70
1	88	3	GO:0022405	BP	hair cycle process	5	P00533,Q6YHK3,Q86U70
1	36	1	GO:0071827	BP	plasma lipoprotein particle organization	4	O95573
1.79e-06	376	15	GO:0001503	BP	ossification	4	Q9UNW1,P17844,P06576,P09038,Q00610,O00622,P00533,P38159,Q00839,P55265,P02545,Q9NR30,P35232,Q9H2U1,P08047
1	579	4	GO:0050817	BP	coagulation	4	O43852,Q99661,Q14643,Q9BW19
1	573	4	GO:0007596	BP	blood coagulation	5	O43852,Q99661,Q14643,Q9BW19
1	259	2	GO:0030168	BP	platelet activation	6	O43852,Q14643
1	7	1	GO:0097242	BP	beta-amyloid clearance	4	P30533
1	647	8	GO:0001816	BP	cytokine production	4	P49959,P61218,Q32MZ4,Q9H1D9,P10809,Q9H2U1,Q9BUI4,P08174
1	55	1	GO:0032615	BP	interleukin-12 production	5	P10809
1	44	1	GO:0032613	BP	interleukin-10 production	5	P10809
1	105	1	GO:0032609	BP	interferon-gamma production	5	P10809
0.00723	127	7	GO:0032606	BP	type I interferon production	5	P49959,P61218,Q32MZ4,Q9H1D9,P10809,Q9H2U1,Q9BUI4
1	21	1	GO:0032607	BP	interferon-alpha production	6	P10809
1	48	2	GO:0032608	BP	interferon-beta production	6	Q9H1D9,Q9BUI4
1	110	1	GO:0032635	BP	interleukin-6 production	5	P10809
1	70	2	GO:0002367	BP	cytokine production involved in immune response	5	P10809,P08174
1	2	1	GO:0002368	BP	B cell cytokine production	6	P10809
1	25	1	GO:0002369	BP	T cell cytokine production	6	P08174
1	9	1	GO:0035743	BP	CD4-positive, alpha-beta T cell cytokine production	7	P08174
1	67	1	GO:0007585	BP	respiratory gaseous exchange	4	P10606
1	150	1	GO:0030534	BP	adult behavior	4	P09543
1	89	1	GO:0008344	BP	adult locomotory behavior	5	P09543
1	146	1	GO:0044236	BP	multicellular organismal metabolic process	4	P07339
1	86	1	GO:0044243	BP	multicellular organismal catabolic process	5	P07339
1	130	1	GO:0044259	BP	multicellular organismal macromolecule metabolic process	5	P07339
1	124	1	GO:0032963	BP	collagen metabolic process	6	P07339
1	79	1	GO:0030574	BP	collagen catabolic process	7	P07339
1	347	2	GO:0048871	BP	multicellular organismal homeostasis	4	Q86U70,P07203
1	40	1	GO:0001659	BP	temperature homeostasis	5	P07203
1	221	1	GO:0001894	BP	tissue homeostasis	5	Q86U70
1	24	1	GO:0010669	BP	epithelial structure maintenance	6	Q86U70
1	39	1	GO:0002532	BP	production of molecular mediator involved in inflammatory response	4	O00161
1	5	1	GO:0002349	BP	histamine production involved in inflammatory response	5	O00161
1	5	1	GO:0002441	BP	histamine secretion involved in inflammatory response	6	O00161
1	5	1	GO:0002553	BP	histamine secretion by mast cell	7	O00161
1	241	2	GO:0007611	BP	learning or memory	4	P16083,P00533
1	106	1	GO:0007613	BP	memory	5	P16083
1	823	11	GO:0032504	BP	multicellular organism reproduction	3	O95394,Q14126,Q6P6C2,Q9Y657,P51532,Q9C0J8,P02545,P30048,P08047,P08174,Q9BW19
1.91e-19	5934	90	GO:0032502	BP	developmental process	2	P23511,P53701,Q9NQ29,Q9UIG0,Q9NQW6,O95394,P51948,P49959,Q13642,Q14126,Q9BV38,Q15717,Q13428,P31040,Q969G3,O75530,Q96FV9,P55809,Q8IWX8,Q9BXP5,P30086,Q6P6C2,Q96RN5,P61218,Q92841,Q96EK6,Q13573,Q9UKV3,P27695,Q9HCK8,Q14155,Q02218,Q9Y657,Q9UNW1,P17844,Q7KZ85,P50416,P06576,O43598,Q9NRZ9,P54278,Q15014,O95573,P61244,O60220,P51532,O43852,P61289,Q12849,P21266,P17096,P09038,Q8TAQ2,Q00610,O00622,P10809,P00533,…
1	35	1	GO:0031128	BP	developmental induction	3	P09038
7.12e-20	5849	90	GO:0044767	BP	single-organism developmental process	3	P23511,P53701,Q9NQ29,Q9UIG0,Q9NQW6,O95394,P51948,P49959,Q13642,Q14126,Q9BV38,Q15717,Q13428,P31040,Q969G3,O75530,Q96FV9,P55809,Q8IWX8,Q9BXP5,P30086,Q6P6C2,Q96RN5,P61218,Q92841,Q96EK6,Q13573,Q9UKV3,P27695,Q9HCK8,Q14155,Q02218,Q9Y657,Q9UNW1,P17844,Q7KZ85,P50416,P06576,O43598,Q9NRZ9,P54278,Q15014,O95573,P61244,O60220,P51532,O43852,P61289,Q12849,P21266,P17096,P09038,Q8TAQ2,Q00610,O00622,P10809,P00533,…
1	301	6	GO:0007568	BP	aging	4	P27695,P17096,P09038,P02545,P09543,P36776
1	93	2	GO:0007569	BP	cell aging	5	P17096,P02545
1	53	1	GO:0090398	BP	cellular senescence	6	P17096
1	2	1	GO:0090402	BP	oncogene-induced cell senescence	7	P17096
1	611	3	GO:0048589	BP	developmental growth	4	P09038,Q6PD62,P07203
1	146	1	GO:0035265	BP	organ growth	5	P09038
5.49e-05	4112	48	GO:0048869	BP	cellular developmental process	4	P23511,Q9NQW6,Q13642,Q15717,Q969G3,Q9BXP5,P30086,Q6P6C2,Q92841,Q13573,Q9UKV3,Q14155,Q02218,P17844,Q7KZ85,P50416,P06576,O43598,Q15014,P51532,O43852,P61289,P21266,P09038,Q8TAQ2,Q00610,O00622,P00533,P38159,Q9NR56,Q00839,Q6YHK3,P55265,P02545,Q71RC2,Q9Y2X9,P30048,Q9NR30,P35232,P09543,P17706,Q9P258,P08047,P62805,Q86U70,Q6PD62,P31150,P07203
2.17e-05	3859	47	GO:0030154	BP	cell differentiation	5	P23511,Q9NQW6,Q13642,Q15717,Q969G3,Q9BXP5,P30086,Q6P6C2,Q92841,Q13573,Q9UKV3,Q14155,Q02218,P17844,Q7KZ85,P50416,P06576,O43598,Q15014,P51532,O43852,P61289,P21266,P09038,Q8TAQ2,Q00610,O00622,P00533,P38159,Q9NR56,Q00839,Q6YHK3,P55265,P02545,Q9Y2X9,P30048,Q9NR30,P35232,P09543,P17706,Q9P258,P08047,P62805,Q86U70,Q6PD62,P31150,P07203
1	203	1	GO:0045444	BP	fat cell differentiation	6	P07203
1	281	4	GO:0048863	BP	stem cell differentiation	6	P23511,Q15717,P09038,Q9Y2X9
1.91e-05	209	11	GO:0001649	BP	osteoblast differentiation	6	P17844,P06576,P09038,Q00610,O00622,P38159,Q00839,P55265,P02545,Q9NR30,P35232
1	262	3	GO:0045165	BP	cell fate commitment	5	P09038,Q8TAQ2,Q6PD62
1	88	1	GO:0001708	BP	cell fate specification	5	P09038
7.91e-14	5038	73	GO:0007275	BP	multicellular organismal development	4	P53701,Q9NQ29,Q9UIG0,Q9NQW6,O95394,P51948,P49959,Q13642,Q14126,Q9BV38,Q15717,Q13428,P31040,Q969G3,O75530,Q96FV9,P55809,Q8IWX8,Q9BXP5,P30086,Q92841,Q96EK6,Q13573,Q9UKV3,Q9HCK8,Q14155,Q02218,Q9Y657,Q9UNW1,P17844,Q7KZ85,P06576,Q9NRZ9,P54278,O95573,P61244,O60220,P51532,O43852,P61289,Q12849,P21266,P09038,Q8TAQ2,O00622,P10809,P00533,P00367,P46013,Q14643,P25705,Q9NR56,Q96SI1,Q6YHK3,P52789,P55265,P02545,…
1	115	3	GO:0009791	BP	post-embryonic development	4	Q92841,Q14643,P05114
1	467	3	GO:0007389	BP	pattern specification process	4	Q12849,P09038,Q86U70
1	96	1	GO:0009798	BP	axis specification	5	Q86U70
1	350	3	GO:0003002	BP	regionalization	5	Q12849,P09038,Q86U70
1	212	2	GO:0009952	BP	anterior/posterior pattern specification	6	Q12849,Q86U70
1	51	1	GO:0009948	BP	anterior/posterior axis specification	7	Q86U70
0.00475	170	8	GO:0098727	BP	maintenance of cell number	3	P23511,Q15717,Q9BXP5,Q96RN5,P61218,P09038,Q86U70,Q6PD62
0.00416	167	8	GO:0019827	BP	stem cell population maintenance	4	P23511,Q15717,Q9BXP5,Q96RN5,P61218,P09038,Q86U70,Q6PD62
1	21	1	GO:0097150	BP	neuronal stem cell population maintenance	5	Q9BXP5
1	78	3	GO:0035019	BP	somatic stem cell population maintenance	5	P61218,P09038,Q86U70
2.5e-13	5272	74	GO:0048856	BP	anatomical structure development	3	P23511,P53701,Q9NQ29,Q9UIG0,Q9NQW6,O95394,P51948,P49959,Q13642,Q14126,Q15717,Q13428,P31040,Q969G3,O75530,Q96FV9,P55809,Q8IWX8,Q9BXP5,P30086,Q92841,Q96EK6,Q13573,Q9UKV3,Q9HCK8,Q14155,Q02218,Q9UNW1,P17844,Q7KZ85,P50416,P06576,O43598,Q9NRZ9,P54278,Q15014,O95573,P61244,O60220,P51532,O43852,P61289,Q12849,P21266,P09038,Q8TAQ2,O00622,P10809,P00533,P00367,P46013,P25705,Q9NR56,Q6YHK3,P52789,P55265,P02545,…
2.19e-11	4482	64	GO:0048731	BP	system development	4	P53701,Q9NQ29,Q9UIG0,Q9NQW6,O95394,P51948,P49959,Q13642,Q14126,Q13428,P31040,Q969G3,O75530,Q96FV9,P55809,Q8IWX8,Q9BXP5,P30086,Q92841,Q96EK6,Q13573,Q9UKV3,Q9HCK8,Q14155,Q02218,Q9UNW1,P17844,Q7KZ85,P06576,Q9NRZ9,P54278,O95573,P61244,O60220,P51532,O43852,P61289,P21266,P09038,Q8TAQ2,O00622,P10809,P00533,P00367,P46013,Q9NR56,Q6YHK3,P52789,P55265,P02545,Q86U86,P30048,Q86YP4,P17028,P09543,P17706,P08047,…
1	151	3	GO:0061008	BP	hepaticobiliary system development	5	Q96EK6,P46013,P08047
1	153	1	GO:0035270	BP	endocrine system development	5	P09038
1	334	2	GO:0001655	BP	urogenital system development	5	Q9NRZ9,P09038
1	228	2	GO:0060541	BP	respiratory system development	5	P09038,P08047
1	507	4	GO:0001501	BP	skeletal system development	5	Q13428,P09038,O00622,P08047
0.0631	2418	28	GO:0007399	BP	nervous system development	5	P51948,P31040,Q969G3,O75530,P55809,Q8IWX8,Q9BXP5,P30086,Q13573,Q9HCK8,Q14155,Q02218,O95573,O60220,P51532,O43852,P61289,P21266,P09038,Q8TAQ2,P00533,P00367,Q9NR56,Q86YP4,P17028,P09543,Q86U70,P31150
1	113	1	GO:0007272	BP	ensheathment of neurons	6	P17028
1	113	1	GO:0008366	BP	axon ensheathment	7	P17028
1	110	1	GO:0042552	BP	myelination	8	P17028
1	1727	14	GO:0022008	BP	neurogenesis	6	Q969G3,Q9BXP5,P30086,Q13573,Q14155,Q02218,O43852,P61289,P09038,Q8TAQ2,P00533,P09543,Q86U70,P31150
1	242	2	GO:0042063	BP	gliogenesis	7	P09038,P09543
1	186	2	GO:0010001	BP	glial cell differentiation	8	P09038,P09543
1	1646	13	GO:0048699	BP	generation of neurons	7	Q9BXP5,P30086,Q13573,Q14155,Q02218,O43852,P61289,P09038,Q8TAQ2,P00533,P09543,Q86U70,P31150
1	1532	11	GO:0030182	BP	neuron differentiation	8	P30086,Q14155,Q02218,O43852,P61289,P09038,Q8TAQ2,P00533,P09543,Q86U70,P31150
1	76	1	GO:0048663	BP	neuron fate commitment	9	Q8TAQ2
1	56	1	GO:0035272	BP	exocrine system development	5	P00533
1	160	2	GO:0055123	BP	digestive system development	5	Q9HCK8,P00533
0.927	987	14	GO:0072359	BP	circulatory system development	5	Q9UIG0,P51948,P49959,Q14126,P55809,Q92841,P06576,P09038,O00622,P02545,Q86U86,Q86YP4,P07203,O75340
1	461	5	GO:0061458	BP	reproductive system development	5	O00622,P00533,Q86U86,P30048,P08047
1	291	1	GO:0072001	BP	renal system development	5	P09038
1	951	12	GO:0007417	BP	central nervous system development	5	P51948,O75530,P55809,Q9HCK8,Q02218,O95573,P09038,Q8TAQ2,P00533,P00367,P09543,Q86U70
1	84	1	GO:0048709	BP	oligodendrocyte differentiation	6	P09543
1	182	3	GO:0021953	BP	central nervous system neuron differentiation	6	Q02218,Q8TAQ2,Q86U70
1	12	1	GO:0021859	BP	pyramidal neuron differentiation	7	Q02218
1	76	1	GO:0007422	BP	peripheral nervous system development	5	P21266
0.0118	843	16	GO:0002520	BP	immune system development	5	Q9NQW6,O95394,Q96FV9,Q9UKV3,Q14155,Q7KZ85,P54278,P10809,Q6YHK3,P55265,P30048,P17706,P08047,P62805,Q86U70,Q6PD62
0.0369	65	5	GO:0002200	BP	somatic diversification of immune receptors	6	Q96FV9,Q7KZ85,P54278,P10809,P55265
0.304	54	4	GO:0002562	BP	somatic diversification of immune receptors via germline recombination within a single locus	7	Q96FV9,Q7KZ85,P54278,P10809
1	18	2	GO:0002566	BP	somatic diversification of immune receptors via somatic mutation	7	P54278,P55265
0.304	54	4	GO:0016445	BP	somatic diversification of immunoglobulins	7	Q96FV9,Q7KZ85,P54278,P10809
1	39	3	GO:0002208	BP	somatic diversification of immunoglobulins involved in immune response	8	Q96FV9,Q7KZ85,P10809
1	17	1	GO:0016446	BP	somatic hypermutation of immunoglobulin genes	8	P54278
0.136	44	4	GO:0016447	BP	somatic recombination of immunoglobulin gene segments	8	Q96FV9,Q7KZ85,P54278,P10809
1	39	3	GO:0002204	BP	somatic recombination of immunoglobulin genes involved in immune response	9	Q96FV9,Q7KZ85,P10809
1	39	3	GO:0045190	BP	isotype switching	10	Q96FV9,Q7KZ85,P10809
1	4	1	GO:0048290	BP	isotype switching to IgA isotypes	11	Q96FV9
1	11	1	GO:0048291	BP	isotype switching to IgG isotypes	11	P10809
0.927	987	14	GO:0072358	BP	cardiovascular system development	5	Q9UIG0,P51948,P49959,Q14126,P55809,Q92841,P06576,P09038,O00622,P02545,Q86U86,Q86YP4,P07203,O75340
1	630	6	GO:0001944	BP	vasculature development	5	P06576,P09038,O00622,Q86YP4,P07203,O75340
1	184	3	GO:0031099	BP	regeneration	4	O43852,P46013,P07203
1	178	1	GO:0048736	BP	appendage development	4	Q9NR56
1	178	1	GO:0060173	BP	limb development	5	Q9NR56
0.225	1807	22	GO:0009888	BP	tissue development	4	Q9NQ29,Q14126,P55809,Q92841,Q13573,Q02218,Q9UNW1,P17844,P50416,O43598,Q12849,P21266,P09038,O00622,P00533,Q9NR56,Q6YHK3,P02545,Q86YP4,Q86U70,Q6PD62,P07203
1	1125	11	GO:0060429	BP	epithelium development	5	P50416,O43598,Q12849,P21266,P09038,O00622,P00533,Q6YHK3,Q86YP4,Q86U70,P07203
1	318	3	GO:0008544	BP	epidermis development	6	P00533,Q6YHK3,Q86U70
1	115	2	GO:0003158	BP	endothelium development	6	P21266,P07203
1	612	6	GO:0030855	BP	epithelial cell differentiation	6	P50416,O43598,P21266,P09038,Q6YHK3,P07203
1	142	1	GO:0002065	BP	columnar/cuboidal epithelial cell differentiation	7	P09038
1	85	1	GO:0060563	BP	neuroepithelial cell differentiation	8	P09038
1	9	1	GO:0061101	BP	neuroendocrine cell differentiation	9	P09038
1	49	1	GO:0002067	BP	glandular epithelial cell differentiation	8	P09038
1	189	1	GO:0009913	BP	epidermal cell differentiation	7	Q6YHK3
1	96	2	GO:0045446	BP	endothelial cell differentiation	7	P21266,P07203
1	80	1	GO:0007492	BP	endoderm development	5	Q6PD62
1	245	4	GO:0061448	BP	connective tissue development	5	P55809,P09038,O00622,P02545
0.182	362	9	GO:0060537	BP	muscle tissue development	5	Q9NQ29,Q14126,Q92841,Q13573,P17844,P09038,Q9NR56,P02545,P07203
0.135	348	9	GO:0014706	BP	striated muscle tissue development	6	Q9NQ29,Q14126,Q92841,Q13573,P17844,P09038,Q9NR56,P02545,P07203
1	60	1	GO:0042246	BP	tissue regeneration	5	P07203
1	33	1	GO:0043403	BP	skeletal muscle tissue regeneration	6	P07203
1	71	3	GO:0048857	BP	neural nucleus development	4	P09038,P00367,P09543
1	762	11	GO:0060322	BP	head development	4	P51948,P55809,Q9HCK8,Q02218,O95573,P09038,Q8TAQ2,P00533,P00367,P09543,Q86U70
0.419	594	11	GO:0061061	BP	muscle structure development	4	Q9NQ29,Q13642,Q92841,Q13573,P17844,Q7KZ85,Q15014,P09038,Q9NR56,P02545,P07203
1	367	5	GO:0042692	BP	muscle cell differentiation	5	Q7KZ85,Q15014,Q9NR56,P02545,P07203
1	82	1	GO:0045445	BP	myoblast differentiation	6	Q9NR56
1	257	3	GO:0051146	BP	striated muscle cell differentiation	6	Q15014,P02545,P07203
1	111	1	GO:0014902	BP	myotube differentiation	7	P07203
1	1030	14	GO:0009790	BP	embryo development	4	Q9HCK8,P17844,Q12849,P09038,O00622,P00533,P25705,Q9NR56,P55265,Q9Y2X9,Q86YP4,P08047,Q86U70,Q6PD62
1	644	10	GO:0009792	BP	embryo development ending in birth or egg hatching	5	Q9HCK8,P17844,P09038,O00622,P00533,Q9NR56,P55265,Q86YP4,P08047,Q6PD62
1	636	9	GO:0043009	BP	chordate embryonic development	6	Q9HCK8,P17844,O00622,P00533,Q9NR56,P55265,Q86YP4,P08047,Q6PD62
0.247	377	9	GO:0001701	BP	in utero embryonic development	7	Q9HCK8,P17844,O00622,P00533,Q9NR56,P55265,Q86YP4,P08047,Q6PD62
1	130	1	GO:0048706	BP	embryonic skeletal system development	7	P08047
1	635	5	GO:0035295	BP	tube development	4	Q9HCK8,P09038,P00533,Q86YP4,P08047
1	146	2	GO:0048565	BP	digestive tract development	5	Q9HCK8,P00533
1	97	1	GO:0061326	BP	renal tubule development	5	P09038
1	168	1	GO:0021915	BP	neural tube development	5	Q86YP4
2.12e-06	3212	44	GO:0048513	BP	animal organ development	4	P53701,Q9NQ29,Q9UIG0,Q9NQW6,O95394,P51948,P49959,Q13642,Q14126,O75530,P55809,Q92841,Q96EK6,Q13573,Q9UKV3,Q9HCK8,Q14155,Q02218,Q9UNW1,P17844,O95573,P61244,P51532,P09038,Q8TAQ2,O00622,P00533,P00367,P46013,Q9NR56,Q6YHK3,P52789,P55265,P02545,Q86U86,P30048,P09543,P17706,P08047,P62805,Q86U70,Q6PD62,P05114,P07203
1	795	12	GO:0048534	BP	hematopoietic or lymphoid organ development	5	Q9NQW6,O95394,Q9UKV3,Q14155,Q6YHK3,P55265,P30048,P17706,P08047,P62805,Q86U70,Q6PD62
0.811	749	12	GO:0030097	BP	hemopoiesis	6	Q9NQW6,O95394,Q9UKV3,Q14155,Q6YHK3,P55265,P30048,P17706,P08047,P62805,Q86U70,Q6PD62
1	24	2	GO:0060216	BP	definitive hemopoiesis	7	P55265,P08047
1	160	5	GO:0002244	BP	hematopoietic progenitor cell differentiation	7	Q9NQW6,Q14155,P55265,P08047,P62805
1	470	3	GO:0002521	BP	leukocyte differentiation	7	Q9UKV3,Q6YHK3,P17706
1	314	1	GO:0030098	BP	lymphocyte differentiation	8	P17706
1	117	1	GO:0030183	BP	B cell differentiation	9	P17706
0.129	346	9	GO:0030099	BP	myeloid cell differentiation	7	Q9UKV3,Q6YHK3,P55265,P30048,P17706,P08047,P62805,Q86U70,Q6PD62
1	50	2	GO:0030219	BP	megakaryocyte differentiation	8	P08047,P62805
1	194	3	GO:0002573	BP	myeloid leukocyte differentiation	8	Q9UKV3,Q6YHK3,P17706
1	36	1	GO:0030225	BP	macrophage differentiation	9	P17706
1	89	1	GO:0030316	BP	osteoclast differentiation	9	Q6YHK3
1	5	1	GO:0072674	BP	multinuclear osteoclast differentiation	10	Q6YHK3
1	29	1	GO:0030224	BP	monocyte differentiation	9	Q9UKV3
0.253	97	5	GO:0030218	BP	erythrocyte differentiation	8	Q9UKV3,P55265,P17706,P08047,Q86U70
1	8	1	GO:0043353	BP	enucleate erythrocyte differentiation	9	P08047
1	255	3	GO:0043588	BP	skin development	5	P00533,Q6YHK3,Q86U70
1	90	3	GO:0098773	BP	skin epidermis development	6	P00533,Q6YHK3,Q86U70
1	129	1	GO:0030216	BP	keratinocyte differentiation	6	Q6YHK3
1	20	1	GO:0048569	BP	post-embryonic organ development	5	P05114
1	545	5	GO:0007423	BP	sensory organ development	5	P61244,P51532,P09038,P08047,P05114
1	360	5	GO:0001654	BP	eye development	6	P61244,P51532,P09038,P08047,P05114
1	314	4	GO:0043010	BP	camera-type eye development	7	P61244,P51532,P08047,P05114
1	8	1	GO:0031077	BP	post-embryonic camera-type eye development	8	P05114
1	472	7	GO:0048732	BP	gland development	5	Q96EK6,P09038,P00533,P46013,P52789,P08047,P07203
1	148	3	GO:0030879	BP	mammary gland development	6	P09038,P52789,P07203
1	77	2	GO:0061180	BP	mammary gland epithelium development	7	P09038,P07203
1	30	1	GO:0033598	BP	mammary gland epithelial cell proliferation	8	P07203
1	16	1	GO:0060644	BP	mammary gland epithelial cell differentiation	8	P09038
1	46	1	GO:0007595	BP	lactation	7	P52789
1	40	1	GO:0007431	BP	salivary gland development	6	P00533
1	148	3	GO:0001889	BP	liver development	6	Q96EK6,P46013,P08047
1	136	1	GO:0031214	BP	biomineral tissue development	5	Q9UNW1
1	103	1	GO:0030282	BP	bone mineralization	6	Q9UNW1
1	200	2	GO:0030323	BP	respiratory tube development	5	P09038,P08047
0.197	366	9	GO:0007517	BP	muscle organ development	5	Q9NQ29,Q13642,Q92841,Q13573,P17844,P09038,Q9NR56,P02545,P07203
1	182	5	GO:0060538	BP	skeletal muscle organ development	6	Q92841,Q13573,P17844,Q9NR56,P07203
1	170	5	GO:0007519	BP	skeletal muscle tissue development	7	Q92841,Q13573,P17844,Q9NR56,P07203
1	69	3	GO:0035914	BP	skeletal muscle cell differentiation	8	Q92841,Q13573,P17844
1	84	1	GO:0031100	BP	organ regeneration	5	P46013
1	449	3	GO:0048568	BP	embryonic organ development	5	O00622,P00533,P08047
1	37	1	GO:0031076	BP	embryonic camera-type eye development	6	P08047
1	36	2	GO:0060612	BP	adipose tissue development	5	P55809,P02545
1	112	1	GO:0021510	BP	spinal cord development	5	O75530
1	538	9	GO:0007507	BP	heart development	5	Q9UIG0,P51948,P49959,Q14126,P55809,P09038,O00622,P02545,Q86U86
1	16	1	GO:0007512	BP	adult heart development	6	P51948
1	67	1	GO:0060419	BP	heart growth	6	P09038
1	182	3	GO:0048738	BP	cardiac muscle tissue development	6	Q14126,P09038,P02545
1	48	1	GO:0003229	BP	ventricular cardiac muscle tissue development	7	Q14126
1	59	1	GO:0055017	BP	cardiac muscle tissue growth	7	P09038
1	39	1	GO:0060038	BP	cardiac muscle cell proliferation	8	P09038
1	121	1	GO:0035051	BP	cardiocyte differentiation	6	P02545
1	99	1	GO:0055007	BP	cardiac muscle cell differentiation	7	P02545
1	20	1	GO:0055012	BP	ventricular cardiac muscle cell differentiation	8	P02545
1	14	1	GO:0003161	BP	cardiac conduction system development	6	Q14126
1	5	1	GO:0003164	BP	His-Purkinje system development	7	Q14126
1	2	1	GO:0003165	BP	Purkinje myocyte development	8	Q14126
1	274	1	GO:0001822	BP	kidney development	5	P09038
1	105	1	GO:0001823	BP	mesonephros development	6	P09038
1	142	1	GO:0072073	BP	kidney epithelium development	6	P09038
1	101	1	GO:0072163	BP	mesonephric epithelium development	7	P09038
1	101	1	GO:0072164	BP	mesonephric tubule development	8	P09038
1	100	1	GO:0001657	BP	ureteric bud development	9	P09038
1	189	2	GO:0051216	BP	cartilage development	5	P09038,O00622
0.482	5	2	GO:0060591	BP	chondroblast differentiation	6	P09038,O00622
1	196	2	GO:0030324	BP	lung development	5	P09038,P08047
1	719	11	GO:0007420	BP	brain development	5	P51948,P55809,Q9HCK8,Q02218,O95573,P09038,Q8TAQ2,P00533,P00367,P09543,Q86U70
1	29	1	GO:0021591	BP	ventricular system development	6	P51948
1	2225	19	GO:0048468	BP	cell development	4	P23511,Q15717,Q9BXP5,P30086,Q13573,Q14155,Q02218,P51532,O43852,P61289,P21266,P09038,O00622,P00533,P02545,P09543,Q9P258,P31150,P07203
1	180	1	GO:0048864	BP	stem cell development	5	P09038
1	158	2	GO:0055001	BP	muscle cell development	5	P02545,P07203
1	145	2	GO:0055002	BP	striated muscle cell development	6	P02545,P07203
1	60	1	GO:0048747	BP	muscle fiber development	7	P07203
1	39	1	GO:0014904	BP	myotube cell development	7	P07203
1	35	1	GO:0048741	BP	skeletal muscle fiber development	8	P07203
1	42	2	GO:0010623	BP	developmental programmed cell death	5	P09038,O00622
1	227	2	GO:0002064	BP	epithelial cell development	5	P21266,P07203
1	57	2	GO:0001885	BP	endothelial cell development	6	P21266,P07203
1	4	1	GO:0008065	BP	establishment of blood-nerve barrier	7	P21266
1	1269	9	GO:0048666	BP	neuron development	5	P30086,Q14155,Q02218,O43852,P61289,P09038,P00533,P09543,P31150
1	76	1	GO:0021954	BP	central nervous system neuron development	6	Q02218
1	1125	8	GO:0031175	BP	neuron projection development	6	P30086,Q14155,O43852,P61289,P09038,P00533,P09543,P31150
1	789	8	GO:0061564	BP	axon development	7	P30086,Q14155,O43852,P61289,P09038,P00533,P09543,P31150
1	49	1	GO:0031102	BP	neuron projection regeneration	7	O43852
1	39	1	GO:0031103	BP	axon regeneration	8	O43852
1	7	1	GO:0014012	BP	peripheral nervous system axon regeneration	9	O43852
1	64	1	GO:0055006	BP	cardiac cell development	5	P02545
1	62	1	GO:0055013	BP	cardiac muscle cell development	6	P02545
1	13	1	GO:0055015	BP	ventricular cardiac muscle cell development	7	P02545
1	32	1	GO:1902742	BP	apoptotic process involved in development	4	O00622
1	607	6	GO:0001568	BP	blood vessel development	4	P06576,P09038,O00622,Q86YP4,P07203,O75340
1	44	1	GO:0060976	BP	coronary vasculature development	5	P09038
1	77	2	GO:0001824	BP	blastocyst development	4	P08047,Q6PD62
1	23	1	GO:0001832	BP	blastocyst growth	5	Q6PD62
1	151	2	GO:0060041	BP	retina development in camera-type eye	4	P61244,P51532
1	133	1	GO:0072006	BP	nephron development	4	P09038
1	109	1	GO:0072009	BP	nephron epithelium development	5	P09038
1	94	1	GO:0072080	BP	nephron tubule development	6	P09038
1	37	1	GO:0003170	BP	heart valve development	4	O00622
1	21	1	GO:0003171	BP	atrioventricular valve development	5	O00622
1	151	1	GO:0003205	BP	cardiac chamber development	4	O00622
1	32	1	GO:0003230	BP	cardiac atrium development	5	O00622
1	111	1	GO:0003231	BP	cardiac ventricle development	5	O00622
1	59	1	GO:0003407	BP	neural retina development	4	P51532
1	159	3	GO:0030902	BP	hindbrain development	4	Q02218,P09038,Q86U70
1	19	1	GO:0021534	BP	cell proliferation in hindbrain	5	P09038
1	18	1	GO:0021924	BP	cell proliferation in external granule layer	6	P09038
1	18	1	GO:0021930	BP	cerebellar granule cell precursor proliferation	7	P09038
1	25	1	GO:0021533	BP	cell differentiation in hindbrain	5	Q86U70
1	89	3	GO:0030901	BP	midbrain development	4	P09038,P00367,P09543
1	48	3	GO:0021762	BP	substantia nigra development	5	P09038,P00367,P09543
1	93	1	GO:0003279	BP	cardiac septum development	4	O00622
1	19	1	GO:0003283	BP	atrial septum development	5	O00622
1	59	1	GO:0003281	BP	ventricular septum development	5	O00622
1	392	5	GO:0030900	BP	forebrain development	4	Q02218,P09038,Q8TAQ2,P00533,P09543
1	107	1	GO:0021761	BP	limbic system development	5	Q02218
1	74	2	GO:0021872	BP	forebrain generation of neurons	5	Q02218,Q8TAQ2
1	67	2	GO:0021879	BP	forebrain neuron differentiation	6	Q02218,Q8TAQ2
1	14	1	GO:0021877	BP	forebrain neuron fate commitment	7	Q8TAQ2
1	4	1	GO:0021898	BP	commitment of multipotent stem cells to neuronal lineage in forebrain	8	Q8TAQ2
1	37	1	GO:0021884	BP	forebrain neuron development	7	Q02218
1	11	1	GO:0021860	BP	pyramidal neuron development	8	Q02218
1	67	2	GO:0021885	BP	forebrain cell migration	5	Q02218,P00533
1	250	2	GO:0021537	BP	telencephalon development	4	Q02218,P00533
1	64	2	GO:0022029	BP	telencephalon cell migration	5	Q02218,P00533
1	83	2	GO:0021536	BP	diencephalon development	4	Q02218,P09038
1	45	1	GO:0021983	BP	pituitary gland development	5	P09038
1	115	2	GO:0022037	BP	metencephalon development	4	Q02218,Q86U70
1	23	1	GO:0021544	BP	subpallium development	4	Q02218
1	103	2	GO:0021549	BP	cerebellum development	4	Q02218,Q86U70
1	169	2	GO:0021543	BP	pallium development	4	Q02218,P00533
1	15	1	GO:0021794	BP	thalamus development	4	Q02218
1	39	1	GO:0021988	BP	olfactory lobe development	4	Q02218
1	17	1	GO:0021756	BP	striatum development	4	Q02218
1	37	1	GO:0021772	BP	olfactory bulb development	4	Q02218
1	2	1	GO:0061034	BP	olfactory bulb mitral cell layer development	5	Q02218
1	9	1	GO:0022028	BP	tangential migration from the subventricular zone to the olfactory bulb	5	Q02218
1	119	1	GO:0021987	BP	cerebral cortex development	4	P00533
1	50	1	GO:0021795	BP	cerebral cortex cell migration	5	P00533
1	54	2	GO:0021695	BP	cerebellar cortex development	4	Q02218,Q86U70
1	30	1	GO:0021680	BP	cerebellar Purkinje cell layer development	4	Q86U70
1	77	1	GO:0021766	BP	hippocampus development	4	Q02218
1	88	3	GO:0001942	BP	hair follicle development	4	P00533,Q6YHK3,Q86U70
1	15	1	GO:0021984	BP	adenohypophysis development	4	P09038
1	3	1	GO:0060128	BP	corticotropin hormone secreting cell differentiation	5	P09038
1	4	1	GO:0060129	BP	thyroid-stimulating hormone-secreting cell differentiation	5	P09038
1	2805	26	GO:0009653	BP	anatomical structure morphogenesis	3	P53701,Q9UIG0,Q13642,P30086,Q14155,P06576,P61289,Q12849,P09038,O00622,P00533,P46013,Q9NR56,Q6YHK3,Q71RC2,Q9Y2X9,Q86YP4,P09543,Q9P258,P08047,Q86U70,Q6PD62,P31150,P05114,P07203,O75340
1	18	1	GO:0009886	BP	post-embryonic morphogenesis	4	P05114
1	1567	9	GO:0032989	BP	cellular component morphogenesis	4	P30086,Q14155,P61289,P09038,P00533,Q71RC2,P09543,Q9P258,P31150
1	1487	9	GO:0000902	BP	cell morphogenesis	5	P30086,Q14155,P61289,P09038,P00533,Q71RC2,P09543,Q9P258,P31150
1	1068	8	GO:0000904	BP	cell morphogenesis involved in differentiation	6	P30086,Q14155,P61289,P09038,P00533,P09543,Q9P258,P31150
1	848	7	GO:0048667	BP	cell morphogenesis involved in neuron differentiation	7	P30086,Q14155,P61289,P09038,P00533,P09543,P31150
1	1133	7	GO:0032990	BP	cell part morphogenesis	5	P30086,Q14155,P61289,P09038,P00533,P09543,P31150
1	1113	7	GO:0048858	BP	cell projection morphogenesis	6	P30086,Q14155,P61289,P09038,P00533,P09543,P31150
1	16	1	GO:0072673	BP	lamellipodium morphogenesis	7	Q14155
1	881	7	GO:0048812	BP	neuron projection morphogenesis	7	P30086,Q14155,P61289,P09038,P00533,P09543,P31150
1	759	7	GO:0007409	BP	axonogenesis	8	P30086,Q14155,P61289,P09038,P00533,P09543,P31150
1	581	5	GO:0097485	BP	neuron projection guidance	8	P30086,Q14155,P61289,P09038,P00533
1	581	5	GO:0007411	BP	axon guidance	9	P30086,Q14155,P61289,P09038,P00533
1	157	1	GO:0035107	BP	appendage morphogenesis	4	Q9NR56
1	157	1	GO:0035108	BP	limb morphogenesis	5	Q9NR56
1	55	2	GO:0010171	BP	body morphogenesis	4	Q9Y2X9,Q86YP4
1	632	5	GO:0048729	BP	tissue morphogenesis	4	Q12849,P09038,O00622,P00533,Q86YP4
1	490	5	GO:0002009	BP	morphogenesis of an epithelium	5	Q12849,P09038,O00622,P00533,Q86YP4
1	28	2	GO:0060571	BP	morphogenesis of an epithelial fold	6	P00533,Q86YP4
1	48	1	GO:0002011	BP	morphogenesis of an epithelial sheet	6	O00622
1	25	1	GO:0090504	BP	epiboly	7	O00622
1	24	1	GO:0090505	BP	epiboly involved in wound healing	8	O00622
1	24	1	GO:0044319	BP	wound healing, spreading of cells	9	O00622
1	217	1	GO:0001763	BP	morphogenesis of a branching structure	4	P09038
1	202	1	GO:0061138	BP	morphogenesis of a branching epithelium	5	P09038
1	384	3	GO:0035239	BP	tube morphogenesis	4	P09038,P00533,Q86YP4
1	55	1	GO:0048546	BP	digestive tract morphogenesis	5	P00533
1	342	2	GO:0060562	BP	epithelial tube morphogenesis	5	P09038,Q86YP4
1	79	1	GO:0061333	BP	renal tubule morphogenesis	6	P09038
1	167	1	GO:0048754	BP	branching morphogenesis of an epithelial tube	5	P09038
1	608	9	GO:0048598	BP	embryonic morphogenesis	4	Q12849,P09038,O00622,Q9NR56,Q9Y2X9,Q86YP4,P08047,Q86U70,Q6PD62
1	134	1	GO:0035113	BP	embryonic appendage morphogenesis	5	Q9NR56
1	134	1	GO:0030326	BP	embryonic limb morphogenesis	6	Q9NR56
1	182	2	GO:0007369	BP	gastrulation	5	Q86U70,Q6PD62
1	30	1	GO:0001702	BP	gastrulation with mouth forming second	6	Q86U70
1	13	2	GO:0010172	BP	embryonic body morphogenesis	5	Q9Y2X9,Q86YP4
1	160	2	GO:0016331	BP	morphogenesis of embryonic epithelium	5	Q12849,Q86YP4
1	965	9	GO:0009887	BP	organ morphogenesis	4	P53701,Q9UIG0,Q13642,P09038,O00622,P00533,P46013,P08047,P05114
1	272	3	GO:0090596	BP	sensory organ morphogenesis	5	P09038,P08047,P05114
1	157	3	GO:0048592	BP	eye morphogenesis	6	P09038,P08047,P05114
1	117	2	GO:0048593	BP	camera-type eye morphogenesis	7	P08047,P05114
1	8	1	GO:0046666	BP	retinal cell programmed cell death	7	P09038
1	135	2	GO:0022612	BP	gland morphogenesis	5	P00533,P46013
1	18	1	GO:0072576	BP	liver morphogenesis	6	P46013
1	16	1	GO:0072575	BP	epithelial cell proliferation involved in liver morphogenesis	7	P46013
1	16	1	GO:0072574	BP	hepatocyte proliferation	8	P46013
1	36	1	GO:0007435	BP	salivary gland morphogenesis	6	P00533
1	94	1	GO:0060993	BP	kidney morphogenesis	5	P09038
1	305	1	GO:0048562	BP	embryonic organ morphogenesis	5	P08047
1	36	1	GO:0048048	BP	embryonic eye morphogenesis	6	P08047
1	27	1	GO:0048596	BP	embryonic camera-type eye morphogenesis	7	P08047
1	229	2	GO:0003007	BP	heart morphogenesis	5	Q9UIG0,O00622
1	105	1	GO:0003206	BP	cardiac chamber morphogenesis	6	O00622
1	27	1	GO:0003209	BP	cardiac atrium morphogenesis	7	O00622
1	12	1	GO:0048563	BP	post-embryonic organ morphogenesis	5	P05114
1	8	1	GO:0048050	BP	post-embryonic eye morphogenesis	6	P05114
1	4	1	GO:0048597	BP	post-embryonic camera-type eye morphogenesis	7	P05114
1	511	5	GO:0048514	BP	blood vessel morphogenesis	4	P06576,P09038,O00622,P07203,O75340
1	11	1	GO:0060977	BP	coronary vasculature morphogenesis	5	P09038
1	31	1	GO:0003179	BP	heart valve morphogenesis	4	O00622
1	18	1	GO:0003181	BP	atrioventricular valve morphogenesis	5	O00622
1	47	1	GO:0021575	BP	hindbrain morphogenesis	4	Q86U70
1	79	1	GO:0072028	BP	nephron morphogenesis	4	P09038
1	77	1	GO:0072088	BP	nephron epithelium morphogenesis	5	P09038
1	75	1	GO:0072078	BP	nephron tubule morphogenesis	6	P09038
1	67	1	GO:0072171	BP	mesonephric tubule morphogenesis	7	P09038
1	66	1	GO:0060675	BP	ureteric bud morphogenesis	8	P09038
1	61	1	GO:0001658	BP	branching involved in ureteric bud morphogenesis	9	P09038
1	26	1	GO:0060561	BP	apoptotic process involved in morphogenesis	4	O00622
1	5	1	GO:0003278	BP	apoptotic process involved in heart morphogenesis	5	O00622
1	43	1	GO:0021587	BP	cerebellum morphogenesis	4	Q86U70
1	51	1	GO:0060411	BP	cardiac septum morphogenesis	4	O00622
1	14	1	GO:0060413	BP	atrial septum morphogenesis	5	O00622
1	36	1	GO:0021696	BP	cerebellar cortex morphogenesis	4	Q86U70
1	17	1	GO:0021692	BP	cerebellar Purkinje cell layer morphogenesis	4	Q86U70
1	1184	10	GO:0048646	BP	anatomical structure formation involved in morphogenesis	3	P06576,P09038,O00622,Q6YHK3,Q86YP4,P08047,Q86U70,Q6PD62,P07203,O75340
1	56	1	GO:0006949	BP	syncytium formation	4	Q6YHK3
1	52	1	GO:0000768	BP	syncytium formation by plasma membrane fusion	5	Q6YHK3
1	4	1	GO:0072675	BP	osteoclast fusion	6	Q6YHK3
1	147	1	GO:0035148	BP	tube formation	4	Q86YP4
1	95	1	GO:0060606	BP	tube closure	5	Q86YP4
1	132	1	GO:0072175	BP	epithelial tube formation	5	Q86YP4
1	131	1	GO:0001838	BP	embryonic epithelial tube formation	6	Q86YP4
1	111	1	GO:0001841	BP	neural tube formation	7	Q86YP4
1	99	1	GO:0014020	BP	primary neural tube formation	8	Q86YP4
1	94	1	GO:0001843	BP	neural tube closure	9	Q86YP4
1	1	1	GO:0021995	BP	neuropore closure	10	Q86YP4
1	1	1	GO:0021506	BP	anterior neuropore closure	11	Q86YP4
1	67	1	GO:0048645	BP	organ formation	4	P09038
1	35	1	GO:0010092	BP	specification of organ identity	5	P09038
1	120	1	GO:0001704	BP	formation of primary germ layer	4	Q6PD62
1	56	1	GO:0001706	BP	endoderm formation	5	Q6PD62
1	45	1	GO:0035987	BP	endodermal cell differentiation	6	Q6PD62
1	35	1	GO:0060795	BP	cell fate commitment involved in formation of primary germ layer	5	Q6PD62
1	16	1	GO:0001711	BP	endodermal cell fate commitment	6	Q6PD62
1	36	2	GO:0001825	BP	blastocyst formation	4	P08047,Q6PD62
1	8	1	GO:0001826	BP	inner cell mass cell differentiation	5	Q6PD62
1	19	2	GO:0001829	BP	trophectodermal cell differentiation	5	P08047,Q6PD62
1	430	5	GO:0001525	BP	angiogenesis	4	P06576,P09038,O00622,P07203,O75340
1	2	1	GO:0002041	BP	intussusceptive angiogenesis	5	O00622
1	64	1	GO:0002040	BP	sprouting angiogenesis	5	P09038
1	33	1	GO:0002042	BP	cell migration involved in sprouting angiogenesis	6	P09038
1	18	1	GO:0060055	BP	angiogenesis involved in wound healing	5	P07203
1	3	1	GO:0060978	BP	angiogenesis involved in coronary vascular morphogenesis	5	P09038
1	26	1	GO:0021697	BP	cerebellar cortex formation	4	Q86U70
1	14	1	GO:0021694	BP	cerebellar Purkinje cell layer formation	4	Q86U70
1	13	1	GO:0021702	BP	cerebellar Purkinje cell differentiation	5	Q86U70
1	7	1	GO:0001842	BP	neural fold formation	4	Q86YP4
1	1467	11	GO:0022610	BP	biological adhesion	2	Q14126,Q9H307,Q14155,P06576,O00622,P10809,P00533,P17706,Q9P258,P08174,Q86U70
1	1461	11	GO:0007155	BP	cell adhesion	3	Q14126,Q9H307,Q14155,P06576,O00622,P10809,P00533,P17706,Q9P258,P08174,Q86U70
1	782	8	GO:0098602	BP	single organism cell adhesion	4	Q14126,Q14155,O00622,P10809,P00533,P17706,Q9P258,P08174
1	311	3	GO:0031589	BP	cell-substrate adhesion	4	Q14155,O00622,Q9P258
1	201	2	GO:0007160	BP	cell-matrix adhesion	5	Q14155,Q9P258
1	70	2	GO:0048041	BP	focal adhesion assembly	6	Q14155,Q9P258
1	82	2	GO:0034446	BP	substrate adhesion-dependent cell spreading	5	Q14155,Q9P258
1	906	6	GO:0098609	BP	cell-cell adhesion	4	Q14126,O00622,P10809,P00533,P17706,P08174
1	222	1	GO:0098742	BP	cell-cell adhesion via plasma-membrane adhesion molecules	5	Q14126
1	156	1	GO:0007156	BP	homophilic cell adhesion via plasma membrane adhesion molecules	6	Q14126
[truncated: 2,734 more rows]

## Sheet: Trn-1
Trn-1 2nd-Z-15% Cargoes (247 Proteins)
p-Value	Total No.	No. of 2nd-Z-15% Cargoes	Term ID	Term Type	Term Name	Term Depth	Accession
5.32e-121	16994	240	GO:0008150	BP	biological_process	1	P23511,Q14847,Q6FI81,P43243,Q9Y3F4,P30876,P27816,O43488,Q9UKD2,Q96KR1,P16989,P67809,Q15717,Q96QK1,O60884,P60953,Q15645,Q96EP5,P12814,P49748,Q00325,P60709,Q12789,Q9NQT4,Q13409,Q9NQ88,Q96FV9,P40939,P15121,Q14247,Q8IWX8,O00625,P30040,P35637,P30043,P49588,Q9UKY7,P60660,P45973,P31942,P52272,Q9Y5L4,P43487,Q96RN5,P30046,O00541,P35579,Q00688,Q13243,Q86U42,Q9H307,O94906,Q05639,O00567,O75832,P13797,O60828,…
3.21e-32	7212	107	GO:0032501	BP	multicellular organismal process	2	P23511,Q6FI81,Q9Y3F4,P30876,P27816,Q96KR1,P16989,P67809,Q15717,P60953,Q15645,Q96EP5,P12814,P49748,P60709,Q9NQ88,Q96FV9,P15121,Q14247,Q8IWX8,O00625,P49588,P60660,P45973,Q9Y5L4,P43487,Q96RN5,P35579,Q13243,Q86U42,O75832,P13797,O60828,Q13887,P36954,P04792,O60869,O76003,Q9UQE7,P07737,Q7KZ85,P26196,O15145,Q96PU8,Q13895,Q04637,P47712,P16949,Q9GZT3,Q16181,P09496,P18846,Q13247,O43707,O15143,P13693,P51659,…
1	2065	16	GO:0003008	BP	system process	3	Q9Y3F4,P60953,Q14247,P49588,P60660,Q9Y5L4,Q86U42,O76003,P06396,P07108,P68032,Q96HC4,P13639,P07355,Q04828,P42330
1	117	2	GO:0003014	BP	renal system process	4	P06396,P42330
1	17	2	GO:0070293	BP	renal absorption	5	P06396,P42330
1	3	1	GO:0097017	BP	renal protein absorption	6	P06396
0.12	398	9	GO:0003012	BP	muscle system process	4	Q14247,P60660,Q86U42,O76003,P06396,P68032,Q96HC4,P13639,P07355
1	328	6	GO:0006936	BP	muscle contraction	5	Q14247,P60660,Q86U42,P68032,P13639,P07355
1	150	2	GO:0006941	BP	striated muscle contraction	6	P68032,P13639
1	102	1	GO:0006939	BP	smooth muscle contraction	6	Q14247
1	63	2	GO:0014896	BP	muscle hypertrophy	5	O76003,Q96HC4
1	17	1	GO:0003298	BP	physiological muscle hypertrophy	6	Q96HC4
1	61	2	GO:0014897	BP	striated muscle hypertrophy	6	O76003,Q96HC4
1	59	2	GO:0003300	BP	cardiac muscle hypertrophy	7	O76003,Q96HC4
1	521	3	GO:0003013	BP	circulatory system process	4	P60953,O76003,P68032
1	265	3	GO:0003015	BP	heart process	5	P60953,O76003,P68032
1	518	3	GO:0008015	BP	blood circulation	5	P60953,O76003,P68032
1	263	3	GO:0060047	BP	heart contraction	6	P60953,O76003,P68032
1	114	1	GO:0060048	BP	cardiac muscle contraction	7	P68032
1	1347	3	GO:0050877	BP	neurological system process	4	P49588,Q9Y5L4,P07108
1	995	1	GO:0007600	BP	sensory perception	5	Q9Y5L4
1	164	1	GO:0050954	BP	sensory perception of mechanical stimulus	6	Q9Y5L4
1	147	1	GO:0007605	BP	sensory perception of sound	7	Q9Y5L4
1	274	1	GO:0050890	BP	cognition	5	P07108
1	114	1	GO:0050905	BP	neuromuscular process	5	P49588
1	61	1	GO:0050885	BP	neuromuscular process controlling balance	6	P49588
6.68e-83	13769	201	GO:0044699	BP	single-organism process	2	P23511,Q14847,Q6FI81,Q9Y3F4,P30876,P27816,O43488,Q96KR1,P16989,P67809,Q15717,Q96QK1,O60884,P60953,Q15645,Q96EP5,P12814,P49748,Q00325,P60709,Q13409,Q9NQ88,Q96FV9,P40939,P15121,Q14247,Q8IWX8,O00625,P30040,P30043,P49588,Q9UKY7,P60660,P45973,P31942,P52272,Q9Y5L4,P43487,Q96RN5,P30046,O00541,P35579,Q13243,Q86U42,Q05639,O75832,P13797,O60828,Q13887,Q16698,P29692,P04350,P06732,O14737,P36954,Q04837,P04792,…
1.75e-15	2026	43	GO:0016265	BP	death	3	Q6FI81,P16989,P67809,P60953,P12814,Q9NQ88,Q96FV9,Q14247,P30040,P49588,Q05639,O75832,P29692,O14737,P04792,P23246,P47712,Q13247,O43707,P63241,P13693,Q9UJU6,P30419,P10599,Q96TA1,P30154,P52565,O00622,Q8N726,P06396,O00422,P68032,P11413,Q13418,P42765,P49773,P06493,O76021,P31947,Q9UNN5,P42330,P21333,P14174
1	96	1	GO:0043473	BP	pigmentation	3	Q14203
4.87e-35	6175	103	GO:0044707	BP	single-multicellular organism process	3	P23511,Q6FI81,Q9Y3F4,P30876,P27816,Q96KR1,P16989,P67809,Q15717,P60953,Q96EP5,P12814,P49748,P60709,Q9NQ88,Q96FV9,P15121,Q14247,Q8IWX8,O00625,P49588,P60660,P45973,P43487,Q96RN5,P35579,Q13243,O75832,P13797,O60828,Q13887,P36954,P04792,O60869,O76003,Q9UQE7,P07737,Q7KZ85,P26196,O15145,Q96PU8,Q13895,Q04637,P47712,P16949,Q16181,P09496,P18846,Q13247,O43707,O15143,P13693,P51659,Q9UJU6,P30419,P62995,Q02241,…
1	109	3	GO:0042303	BP	molting cycle	4	P60953,P49588,P07108
1	109	3	GO:0042633	BP	hair cycle	5	P60953,P49588,P07108
1	228	5	GO:0090130	BP	tissue migration	4	Q9Y3F4,P35579,P04792,P07737,P68032
1	223	4	GO:0090132	BP	epithelium migration	5	Q9Y3F4,P35579,P04792,P07737
1	50	1	GO:0050879	BP	multicellular organismal movement	4	P13639
1	50	1	GO:0050881	BP	musculoskeletal movement	5	P13639
1	39	1	GO:0003009	BP	skeletal muscle contraction	6	P13639
1	88	3	GO:0022404	BP	molting cycle process	4	P60953,P49588,P07108
1	88	3	GO:0022405	BP	hair cycle process	5	P60953,P49588,P07108
1	376	5	GO:0001503	BP	ossification	4	P47712,P51659,O00622,Q13418,O76021
1.15e-07	579	18	GO:0050817	BP	coagulation	4	P60953,P12814,P60709,P45973,P35579,P04792,P07737,P47712,O43707,Q02241,P21291,Q13418,P46108,P07355,P62937,P21333,P62328,P14174
1	172	2	GO:0007586	BP	digestion	4	Q9Y3F4,Q04828
1	96	2	GO:0022600	BP	digestive system process	5	Q9Y3F4,Q04828
1	28	1	GO:0044241	BP	lipid digestion	5	Q04828
1	7	1	GO:0097242	BP	beta-amyloid clearance	4	P30533
1	647	4	GO:0001816	BP	cytokine production	4	P04792,P61769,Q15366,P14174
1	107	1	GO:0071706	BP	tumor necrosis factor superfamily cytokine production	5	P04792
1	102	1	GO:0032640	BP	tumor necrosis factor production	6	P04792
1	68	1	GO:0032612	BP	interleukin-1 production	5	P04792
1	58	1	GO:0032611	BP	interleukin-1 beta production	6	P04792
1	73	1	GO:0032602	BP	chemokine production	5	P14174
1	10	1	GO:0072567	BP	chemokine (C-X-C motif) ligand 2 production	6	P14174
1	127	1	GO:0032606	BP	type I interferon production	5	Q15366
1.07e-09	1990	35	GO:0008283	BP	cell proliferation	3	P23511,Q9Y3F4,P67809,O60884,P60953,Q96EP5,P15121,Q8IWX8,Q9UKY7,O00541,O14737,Q13895,P47712,Q07666,P33552,Q13247,P63241,P10599,P23381,O00622,Q8N726,P31949,Q13418,P13639,P62633,P06493,P17812,P31947,P07355,P55209,P42330,P06703,O43663,Q9ULC4,P14174
1	153	3	GO:0033002	BP	muscle cell proliferation	4	P15121,Q13418,P06493
1	52	1	GO:0014855	BP	striated muscle cell proliferation	5	P06493
1	105	2	GO:0048659	BP	smooth muscle cell proliferation	5	P15121,Q13418
1	26	1	GO:0033687	BP	osteoblast proliferation	4	O00622
1	4	1	GO:0071335	BP	hair follicle cell proliferation	4	P60953
1	153	1	GO:0072089	BP	stem cell proliferation	4	P23511
1	279	3	GO:0070661	BP	leukocyte proliferation	4	Q8N726,P17812,P14174
1	267	3	GO:0032943	BP	mononuclear cell proliferation	5	Q8N726,P17812,P14174
1	90	3	GO:0048144	BP	fibroblast proliferation	4	P07355,P06703,P14174
1	354	4	GO:0050673	BP	epithelial cell proliferation	4	Q9Y3F4,P60953,Q13247,P31947
1	38	2	GO:0043616	BP	keratinocyte proliferation	5	Q13247,P31947
1	151	1	GO:0061351	BP	neural precursor cell proliferation	4	Q13418
0.00273	1004	17	GO:0040007	BP	growth	2	P16989,P60953,Q14247,O75832,P02795,Q92541,O00622,Q8N726,P06396,Q92879,P32320,Q96HC4,Q13418,P06493,P31947,Q99829,Q9ULC4
0.00214	1467	21	GO:0022610	BP	biological adhesion	2	P60953,P12814,P60709,Q14247,P35579,Q9H307,P04792,Q13895,O43707,P52565,O00622,Q93052,Q8N726,P06396,P21291,Q13418,P61769,P17812,Q9UNN5,P21333,P60903
0.00201	1461	21	GO:0007155	BP	cell adhesion	3	P60953,P12814,P60709,Q14247,P35579,Q9H307,P04792,Q13895,O43707,P52565,O00622,Q93052,Q8N726,P06396,P21291,Q13418,P61769,P17812,Q9UNN5,P21333,P60903
0.0136	782	14	GO:0098602	BP	single organism cell adhesion	4	P60953,P60709,P35579,P04792,O43707,O00622,Q8N726,P06396,P21291,Q13418,P61769,P17812,P21333,P60903
1	906	12	GO:0098609	BP	cell-cell adhesion	4	P60953,P60709,P35579,P04792,O00622,Q8N726,P06396,P21291,Q13418,P61769,P17812,P21333
0.15	731	12	GO:0016337	BP	single organismal cell-cell adhesion	5	P60953,P60709,P35579,P04792,O00622,Q8N726,P06396,P21291,Q13418,P61769,P17812,P21333
0.0343	525	11	GO:0034109	BP	homotypic cell-cell adhesion	6	P60953,P60709,P35579,P04792,Q8N726,P06396,P21291,Q13418,P61769,P17812,P21333
1	492	6	GO:0007159	BP	leukocyte cell-cell adhesion	6	P60953,P35579,Q8N726,P06396,P61769,P17812
1	459	6	GO:0070486	BP	leukocyte aggregation	7	P60953,P35579,Q8N726,P06396,P61769,P17812
1	452	6	GO:0071593	BP	lymphocyte aggregation	8	P60953,P35579,Q8N726,P06396,P61769,P17812
1	15	1	GO:0090136	BP	epithelial cell-cell adhesion	6	P60953
0.0172	311	9	GO:0031589	BP	cell-substrate adhesion	4	P60953,P12814,Q14247,O43707,O00622,Q8N726,Q13418,P21333,P60903
1	201	5	GO:0007160	BP	cell-matrix adhesion	5	P12814,Q14247,Q8N726,Q13418,P60903
2.66e-31	5739	95	GO:0051179	BP	localization	2	Q14847,Q9Y3F4,P27816,Q96QK1,P60953,P12814,Q00325,P60709,Q13409,Q96FV9,Q14247,Q8IWX8,P30040,P52272,Q9Y5L4,P43487,O00541,P35579,Q13243,Q86U42,O94906,O75832,O14737,P04792,P07737,Q7KZ85,O15145,Q96PU8,Q14677,Q00341,P47712,P16949,Q14696,Q9GZT3,Q07666,P50995,P22626,P09496,Q13247,Q9BW27,O43707,O15143,P62826,O75153,P63241,P13693,P09651,Q9UJU6,P30419,P10599,P61160,Q14061,P52565,O00622,P21281,Q8N726,P06396,…
0.0068	1320	19	GO:0051674	BP	localization of cell	3	Q9Y3F4,P60953,Q14247,P35579,P04792,P07737,Q9GZT3,Q9BW27,O43707,P52565,O00622,P06396,Q5VTR2,O15511,Q13418,P06493,P62937,O75400,P14174
9.3e-21	2805	57	GO:0033036	BP	macromolecule localization	3	Q96QK1,P60953,Q96FV9,Q14247,Q8IWX8,P30040,P52272,Q9Y5L4,O00541,P35579,Q13243,Q86U42,O94906,O75832,O14737,Q7KZ85,Q96PU8,Q00341,P47712,Q14696,Q07666,P22626,P09496,Q13247,Q9BW27,O43707,P62826,P63241,P09651,P30419,P10599,P52565,P21281,Q8N726,P06396,P00367,Q92621,Q01081,Q01130,Q8N183,Q10713,Q15019,P51991,P06493,O76021,Q01780,P31947,P52292,P07355,Q9UNN5,Q04828,P42330,P62937,P21333,P60903,O60749,P14174
1	343	4	GO:0010876	BP	lipid localization	4	Q00341,P47712,Q04828,P14174
3.81e-11	2445	41	GO:0008104	BP	protein localization	4	Q96QK1,P60953,Q14247,Q8IWX8,P30040,P52272,Q9Y5L4,O00541,P35579,O75832,O14737,Q14696,P09496,Q9BW27,O43707,P62826,P63241,P30419,P10599,P52565,P21281,Q8N726,P06396,P00367,Q92621,Q01081,Q8N183,Q10713,Q15019,P06493,O76021,P31947,P52292,P07355,Q9UNN5,P42330,P62937,P21333,P60903,O60749,P14174
1	108	3	GO:0031503	BP	protein complex localization	5	O75832,P62826,Q9UNN5
1	6	1	GO:1902414	BP	protein localization to cell junction	5	O43707
1	1	1	GO:1902396	BP	protein localization to bicellular tight junction	6	O43707
8.19e-16	195	18	GO:0006403	BP	RNA localization	4	Q96FV9,Q13243,Q86U42,O94906,Q7KZ85,Q96PU8,Q07666,P22626,Q13247,Q9BW27,P62826,P63241,P09651,Q92621,Q01081,Q01130,P51991,Q01780
6.48e-26	4711	80	GO:0051234	BP	establishment of localization	3	Q14847,P27816,Q96QK1,P60953,P12814,Q00325,P60709,Q13409,Q96FV9,Q14247,Q8IWX8,P30040,P52272,Q9Y5L4,P43487,P35579,Q13243,Q86U42,O75832,O14737,P07737,Q7KZ85,O15145,Q96PU8,Q14677,Q00341,P47712,Q07666,P50995,P22626,P09496,Q13247,Q9BW27,O43707,O15143,P62826,P63241,P13693,P09651,Q9UJU6,P30419,P10599,P61160,Q14061,P21281,Q8N726,P06396,P00367,P07108,Q92621,Q01081,Q01130,O15511,P30533,Q8N183,Q10713,P61769,…
3.06e-14	163	16	GO:0051236	BP	establishment of RNA localization	4	Q96FV9,Q13243,Q86U42,Q7KZ85,Q96PU8,Q07666,P22626,Q13247,Q9BW27,P62826,P63241,P09651,Q92621,Q01081,Q01130,P51991
5.12e-26	4571	79	GO:0006810	BP	transport	4	Q14847,Q96QK1,P60953,P12814,Q00325,P60709,Q13409,Q96FV9,Q14247,Q8IWX8,P30040,P52272,Q9Y5L4,P43487,P35579,Q13243,Q86U42,O75832,O14737,P07737,Q7KZ85,O15145,Q96PU8,Q14677,Q00341,P47712,Q07666,P50995,P22626,P09496,Q13247,Q9BW27,O43707,O15143,P62826,P63241,P13693,P09651,Q9UJU6,P30419,P10599,P61160,Q14061,P21281,Q8N726,P06396,P00367,P07108,Q92621,Q01081,Q01130,O15511,P30533,Q8N183,Q10713,P61769,Q08379,…
5.7e-15	2637	48	GO:0071702	BP	organic substance transport	5	Q96QK1,P60953,Q96FV9,Q14247,Q8IWX8,P30040,P52272,Q9Y5L4,P35579,Q13243,Q86U42,O75832,O14737,Q7KZ85,Q96PU8,Q00341,P47712,Q07666,P22626,P09496,Q13247,Q9BW27,O43707,P62826,P63241,P09651,P10599,P21281,Q8N726,P00367,Q92621,Q01081,Q01130,Q8N183,Q10713,Q15019,P51991,P06493,P31947,P52292,P07355,Q9UNN5,Q04828,P42330,P62937,P21333,O60749,P14174
7.1e-08	807	21	GO:0071705	BP	nitrogen compound transport	5	Q96FV9,Q13243,Q86U42,O75832,Q7KZ85,Q96PU8,Q07666,P22626,Q13247,Q9BW27,P62826,P63241,P09651,P00367,Q92621,Q01081,Q01130,Q8N183,Q15019,P51991,Q9UNN5
5.04e-13	194	16	GO:0015931	BP	nucleobase-containing compound transport	6	Q96FV9,Q13243,Q86U42,Q7KZ85,Q96PU8,Q07666,P22626,Q13247,Q9BW27,P62826,P63241,P09651,Q92621,Q01081,Q01130,P51991
2.51e-14	161	16	GO:0050657	BP	nucleic acid transport	7	Q96FV9,Q13243,Q86U42,Q7KZ85,Q96PU8,Q07666,P22626,Q13247,Q9BW27,P62826,P63241,P09651,Q92621,Q01081,Q01130,P51991
2.51e-14	161	16	GO:0050658	BP	RNA transport	8	Q96FV9,Q13243,Q86U42,Q7KZ85,Q96PU8,Q07666,P22626,Q13247,Q9BW27,P62826,P63241,P09651,Q92621,Q01081,Q01130,P51991
1	1	1	GO:1990428	BP	miRNA transport	9	P22626
1.59e-12	135	14	GO:0051028	BP	mRNA transport	9	Q96FV9,Q13243,Q86U42,Q7KZ85,Q96PU8,P22626,Q13247,Q9BW27,P63241,P09651,Q92621,Q01081,Q01130,P51991
1	44	1	GO:0098657	BP	import into cell	5	P61769
7.09e-11	1400	31	GO:0016192	BP	vesicle-mediated transport	5	Q96QK1,P60953,P12814,P60709,Q13409,Q14247,P35579,P07737,O15145,Q14677,P47712,P50995,P09496,O43707,O15143,Q9UJU6,P61160,P06396,O15511,P30533,P61769,Q08379,P46108,P07355,P62937,P21333,P60903,Q14203,O60749,P62328,Q99829
6.95e-08	639	19	GO:0006897	BP	endocytosis	6	P60953,P60709,Q14247,P35579,O15145,Q14677,P50995,P09496,O43707,O15143,Q9UJU6,P61160,P06396,O15511,P30533,P61769,P46108,P07355,O60749
1	301	6	GO:0006898	BP	receptor-mediated endocytosis	7	Q14247,P09496,Q9UJU6,P30533,P61769,P07355
1	55	1	GO:0072583	BP	clathrin-mediated endocytosis	8	P09496
1	17	1	GO:0006907	BP	pinocytosis	7	O43707
1.46e-09	2012	35	GO:0045184	BP	establishment of protein localization	4	Q96QK1,P60953,Q14247,Q8IWX8,P30040,P52272,Q9Y5L4,P35579,O75832,O14737,P09496,Q9BW27,O43707,P62826,P63241,P30419,P10599,P21281,Q8N726,P00367,Q92621,Q01081,Q8N183,Q10713,P06493,P31947,P52292,P07355,Q9UNN5,P42330,P62937,P21333,P60903,O60749,P14174
4.4e-09	1862	33	GO:0015031	BP	protein transport	5	Q96QK1,P60953,Q14247,Q8IWX8,P30040,P52272,Q9Y5L4,P35579,O75832,O14737,P09496,Q9BW27,O43707,P62826,P63241,P10599,P21281,Q8N726,P00367,Q92621,Q01081,Q8N183,Q10713,P06493,P31947,P52292,P07355,Q9UNN5,P42330,P62937,P21333,O60749,P14174
2.46e-22	4182	71	GO:1902578	BP	single-organism localization	3	Q14847,P27816,Q96QK1,P60953,P12814,Q00325,P60709,Q13409,Q96FV9,Q8IWX8,P30040,P52272,Q9Y5L4,P35579,Q13243,Q86U42,O75832,O14737,P07737,Q7KZ85,O15145,Q14677,Q00341,P47712,P50995,P22626,P09496,Q13247,Q9BW27,O43707,O15143,P62826,O75153,P63241,P13693,P30419,P10599,P61160,Q14061,P21281,Q8N726,P06396,P00367,Q92621,Q01081,Q01130,O15511,Q8N183,Q10713,P61769,Q08379,P46108,P42765,Q9BQE3,Q15019,P06493,P31947,…
3.4e-21	4002	68	GO:0044765	BP	single-organism transport	4	Q14847,Q96QK1,P60953,P12814,Q00325,P60709,Q13409,Q96FV9,Q8IWX8,P30040,P52272,Q9Y5L4,P35579,Q13243,Q86U42,O75832,O14737,P07737,Q7KZ85,O15145,Q14677,Q00341,P47712,P50995,P22626,P09496,Q13247,Q9BW27,O43707,O15143,P62826,P63241,P13693,P30419,P10599,P61160,Q14061,P21281,Q8N726,P06396,P00367,Q92621,Q01081,Q01130,O15511,Q8N183,Q10713,P61769,Q08379,P46108,P42765,Q9BQE3,Q15019,P06493,P31947,P52292,P07355,…
1	159	2	GO:0006818	BP	hydrogen transport	5	O43707,P21281
1	42	2	GO:1901571	BP	fatty acid derivative transport	5	P47712,P14174
1	306	4	GO:0015849	BP	organic acid transport	5	P47712,Q15019,Q04828,P14174
1	236	1	GO:0015850	BP	organic hydroxy compound transport	5	Q04828
1	1549	13	GO:0006811	BP	ion transport	5	Q14847,Q00325,Q8IWX8,P47712,O43707,P13693,Q14061,P21281,P61769,Q15019,Q04828,P06703,P14174
1	13	1	GO:0099587	BP	inorganic ion import into cell	6	P61769
1	582	5	GO:0006820	BP	anion transport	6	Q00325,P47712,Q15019,Q04828,P14174
1	130	1	GO:0015698	BP	inorganic anion transport	7	Q00325
1	18	1	GO:0006817	BP	phosphate ion transport	8	Q00325
1	426	4	GO:0015711	BP	organic anion transport	7	P47712,Q15019,Q04828,P14174
1	304	4	GO:0046942	BP	carboxylic acid transport	8	P47712,Q15019,Q04828,P14174
1	42	2	GO:0071715	BP	icosanoid transport	9	P47712,P14174
1	154	3	GO:0015718	BP	monocarboxylic acid transport	9	P47712,Q04828,P14174
1	91	1	GO:0006835	BP	dicarboxylic acid transport	9	Q15019
1	150	1	GO:0006865	BP	amino acid transport	9	Q15019
1	26	1	GO:0015800	BP	acidic amino acid transport	10	Q15019
1	63	1	GO:0015807	BP	L-amino acid transport	10	Q15019
1	23	1	GO:0015813	BP	L-glutamate transport	11	Q15019
1	1052	6	GO:0006812	BP	cation transport	6	Q8IWX8,O43707,P13693,Q14061,P21281,P61769
1	38	1	GO:0072512	BP	trivalent inorganic cation transport	7	P21281
1	430	3	GO:0072511	BP	divalent inorganic cation transport	7	Q8IWX8,P13693,P61769
1	13	1	GO:0098659	BP	inorganic cation import into cell	7	P61769
1	813	6	GO:0030001	BP	metal ion transport	7	Q8IWX8,O43707,P13693,Q14061,P21281,P61769
1	110	3	GO:0000041	BP	transition metal ion transport	8	Q14061,P21281,P61769
1	19	1	GO:0006825	BP	copper ion transport	9	Q14061
1	57	2	GO:0006826	BP	iron ion transport	9	P21281,P61769
1	38	1	GO:0015682	BP	ferric iron transport	10	P21281
1	36	1	GO:0033572	BP	transferrin transport	11	P21281
1	10	1	GO:0097286	BP	iron ion import	10	P61769
1	7	1	GO:0097459	BP	iron ion import into cell	11	P61769
1	427	3	GO:0070838	BP	divalent metal ion transport	8	Q8IWX8,P13693,P61769
1	380	2	GO:0006816	BP	calcium ion transport	9	Q8IWX8,P13693
1	151	1	GO:0070509	BP	calcium ion import	10	Q8IWX8
1	126	1	GO:0060401	BP	cytosolic calcium ion transport	10	Q8IWX8
1	8	1	GO:0015684	BP	ferrous iron transport	9	P61769
1	5	1	GO:0070627	BP	ferrous iron import	10	P61769
1	4	1	GO:0097460	BP	ferrous iron import into cell	11	P61769
1	584	2	GO:0015672	BP	monovalent inorganic cation transport	7	O43707,P21281
1	206	1	GO:0006814	BP	sodium ion transport	8	O43707
1	157	2	GO:0015992	BP	proton transport	8	O43707,P21281
1	1096	12	GO:0046903	BP	secretion	5	P12814,P30040,P07737,P47712,O43707,P00367,Q8N183,P07355,P62937,P21333,P62328,P14174
1	115	2	GO:0046717	BP	acid secretion	6	P47712,P14174
1	38	2	GO:0032309	BP	icosanoid secretion	7	P47712,P14174
1	191	2	GO:0008643	BP	carbohydrate transport	5	Q9BW27,Q92621
1	153	2	GO:0015749	BP	monosaccharide transport	6	Q9BW27,Q92621
1	151	2	GO:0008645	BP	hexose transport	7	Q9BW27,Q92621
1	149	2	GO:0015758	BP	glucose transport	8	Q9BW27,Q92621
1	12	1	GO:0045056	BP	transcytosis	5	Q96QK1
1	368	4	GO:0042886	BP	amide transport	5	O75832,P00367,Q8N183,Q9UNN5
1	344	4	GO:0015833	BP	peptide transport	6	O75832,P00367,Q8N183,Q9UNN5
1	281	2	GO:0002790	BP	peptide secretion	7	P00367,Q8N183
0.000186	240	10	GO:0006909	BP	phagocytosis	5	P60953,P60709,P35579,O15145,P50995,O15143,P61160,P06396,O15511,P46108
1	79	1	GO:0015837	BP	amine transport	5	Q15019
1	309	4	GO:0006869	BP	lipid transport	5	Q00341,P47712,Q04828,P14174
1	72	1	GO:0015918	BP	sterol transport	6	Q04828
1	70	1	GO:0030301	BP	cholesterol transport	7	Q04828
1	83	2	GO:0015908	BP	fatty acid transport	6	P47712,P14174
1	51	2	GO:0015909	BP	long-chain fatty acid transport	7	P47712,P14174
1	20	2	GO:1903963	BP	arachidonate transport	8	P47712,P14174
1	20	2	GO:0050482	BP	arachidonic acid secretion	9	P47712,P14174
1	19	1	GO:0015732	BP	prostaglandin transport	7	P14174
1	16	1	GO:0032310	BP	prostaglandin secretion	8	P14174
1	32	1	GO:0015721	BP	bile acid and bile salt transport	6	Q04828
1	9	1	GO:0072321	BP	chaperone-mediated protein transport	5	Q9Y5L4
3.25e-06	326	13	GO:0017038	BP	protein import	5	Q8IWX8,P52272,O75832,O14737,Q9BW27,P62826,P10599,Q92621,P06493,P52292,Q9UNN5,P42330,P21333
1	33	1	GO:0050892	BP	intestinal absorption	5	Q04828
1	14	1	GO:0098856	BP	intestinal lipid absorption	6	Q04828
1	14	1	GO:0030299	BP	intestinal cholesterol absorption	7	Q04828
3.36e-22	3044	61	GO:0051641	BP	cellular localization	3	P27816,Q96QK1,P60953,P12814,Q13409,Q96FV9,Q14247,Q8IWX8,P30040,P52272,Q9Y5L4,P43487,O00541,P35579,Q13243,Q86U42,O75832,O14737,P07737,Q7KZ85,Q14677,Q14696,Q07666,P22626,P09496,Q13247,Q9BW27,O43707,P62826,O75153,P63241,P09651,P30419,P10599,P61160,Q8N726,P06396,P00367,Q92621,Q01081,Q01130,Q8N183,Q10713,Q08379,P42765,Q9BQE3,P06493,Q01780,P31947,P52292,P07355,Q9UNN5,P42330,P07437,P62937,P21333,P60903,…
8.25e-10	97	11	GO:0071166	BP	ribonucleoprotein complex localization	4	Q96FV9,Q13243,Q86U42,Q7KZ85,P22626,Q13247,Q9BW27,P62826,P63241,Q01081,Q01130
3.17e-10	1284	29	GO:1902580	BP	single-organism cellular localization	4	P27816,P60953,Q8IWX8,Q9Y5L4,P35579,O75832,O14737,Q9BW27,O43707,P62826,O75153,P30419,P10599,P61160,Q8N726,P06396,Q92621,Q01081,Q10713,Q08379,P06493,P31947,P52292,P07355,Q9UNN5,P42330,P21333,P60903,Q14203
1.72e-10	1549	32	GO:0070727	BP	cellular macromolecule localization	4	Q96QK1,P60953,Q14247,Q8IWX8,P30040,P52272,Q9Y5L4,O00541,O75832,O14737,Q14696,P09496,Q9BW27,P62826,P63241,P30419,P10599,Q8N726,P06396,Q92621,Q01081,Q10713,P06493,Q01780,P31947,P52292,P07355,Q9UNN5,P42330,P21333,P60903,O60749
8.31e-10	1538	31	GO:0034613	BP	cellular protein localization	5	Q96QK1,P60953,Q14247,Q8IWX8,P30040,P52272,Q9Y5L4,O00541,O75832,O14737,Q14696,P09496,Q9BW27,P62826,P63241,P30419,P10599,Q8N726,P06396,Q92621,Q01081,Q10713,P06493,P31947,P52292,P07355,Q9UNN5,P42330,P21333,P60903,O60749
2.42e-06	884	20	GO:0033365	BP	protein localization to organelle	6	Q8IWX8,P52272,Q9Y5L4,O00541,O75832,O14737,Q9BW27,P62826,P30419,P10599,Q8N726,Q92621,Q01081,Q10713,P06493,P31947,P52292,Q9UNN5,P42330,P21333
8.76e-06	354	13	GO:0034504	BP	protein localization to nucleus	7	Q8IWX8,P52272,O75832,Q9BW27,P62826,P10599,Q8N726,Q92621,P06493,P52292,Q9UNN5,P42330,P21333
1	3	1	GO:1902570	BP	protein localization to nucleolus	8	P62826
1	58	1	GO:0034502	BP	protein localization to chromosome	7	P06493
1	13	1	GO:0071459	BP	protein localization to chromosome, centromeric region	8	P06493
1	11	1	GO:0034501	BP	protein localization to kinetochore	9	P06493
0.0482	195	7	GO:0070585	BP	protein localization to mitochondrion	7	Q9Y5L4,O14737,P30419,Q8N726,Q01081,Q10713,P31947
1.11e-06	667	18	GO:0072594	BP	establishment of protein localization to organelle	7	Q8IWX8,Q9Y5L4,O75832,O14737,Q9BW27,P62826,P30419,P10599,Q8N726,Q92621,Q01081,Q10713,P06493,P31947,P52292,Q9UNN5,P42330,P21333
0.0407	190	7	GO:0072655	BP	establishment of protein localization to mitochondrion	8	Q9Y5L4,O14737,P30419,Q8N726,Q01081,Q10713,P31947
1	213	2	GO:1990778	BP	protein localization to cell periphery	6	P07355,P60903
1	47	2	GO:0034394	BP	protein localization to cell surface	6	Q14696,P21333
1	26	1	GO:0034629	BP	cellular protein complex localization	6	P62826
1	11	1	GO:0008298	BP	intracellular mRNA localization	5	Q01780
1	93	2	GO:0051668	BP	localization within membrane	4	P06396,Q08379
1	5	1	GO:0051665	BP	membrane raft localization	5	P06396
1	1	1	GO:0044856	BP	plasma membrane raft localization	6	P06396
0.397	466	9	GO:0051640	BP	organelle localization	4	P27816,P60953,P35579,O43707,P62826,O75153,P61160,Q08379,Q14203
1	8	1	GO:0033750	BP	ribosome localization	5	P62826
1	61	1	GO:0050000	BP	chromosome localization	5	P61160
1	25	1	GO:0051647	BP	nucleus localization	5	P60953
1	12	1	GO:0051645	BP	Golgi localization	5	P60953
1	36	1	GO:0051646	BP	mitochondrion localization	5	O75153
1	240	3	GO:0051648	BP	vesicle localization	5	O43707,Q08379,Q14203
0.329	355	8	GO:0051656	BP	establishment of organelle localization	5	P27816,P60953,P35579,O43707,P62826,P61160,Q08379,Q14203
1.38e-19	2640	54	GO:0051649	BP	establishment of localization in cell	4	P27816,Q96QK1,P60953,P12814,Q13409,Q96FV9,Q14247,Q8IWX8,P30040,Q9Y5L4,P43487,P35579,Q13243,Q86U42,O75832,O14737,P07737,Q7KZ85,Q14677,Q07666,P22626,P09496,Q13247,Q9BW27,O43707,P62826,P63241,P09651,P30419,P10599,P61160,Q8N726,P00367,Q92621,Q01081,Q01130,Q8N183,Q10713,Q08379,P42765,Q9BQE3,P06493,P31947,P52292,P07355,Q9UNN5,P42330,P07437,P62937,P21333,Q14203,O60749,P62328,P14174
1	8	1	GO:0033753	BP	establishment of ribosome localization	5	P62826
3.73e-18	1905	45	GO:0046907	BP	intracellular transport	5	Q96QK1,P60953,Q13409,Q96FV9,Q14247,Q8IWX8,P30040,Q9Y5L4,P43487,Q13243,Q86U42,O75832,O14737,Q7KZ85,Q14677,Q07666,P22626,P09496,Q13247,Q9BW27,O43707,P62826,P63241,P09651,P30419,P10599,P61160,Q8N726,Q92621,Q01081,Q01130,Q10713,Q08379,P42765,Q9BQE3,P06493,P31947,P52292,P07355,Q9UNN5,P42330,P07437,P21333,Q14203,O60749
1.54e-14	1742	39	GO:1902582	BP	single-organism intracellular transport	6	Q96QK1,P60953,Q13409,Q96FV9,Q8IWX8,Q9Y5L4,Q13243,Q86U42,O75832,O14737,Q7KZ85,Q14677,P22626,P09496,Q13247,Q9BW27,O43707,P62826,P63241,P30419,P10599,Q8N726,Q92621,Q01081,Q01130,Q10713,Q08379,P42765,Q9BQE3,P06493,P31947,P52292,P07355,Q9UNN5,P42330,P07437,P21333,Q14203,O60749
0.504	126	5	GO:0030705	BP	cytoskeleton-dependent intracellular transport	7	P60953,O43707,Q9BQE3,P07437,Q14203
1	6	1	GO:0099515	BP	actin filament-based transport	8	O43707
1	90	1	GO:0007034	BP	vacuolar transport	7	Q96QK1
1	64	1	GO:0007041	BP	lysosomal transport	8	Q96QK1
1	250	4	GO:0016197	BP	endosomal transport	7	Q96QK1,P21333,Q14203,O60749
0.0673	283	8	GO:0006839	BP	mitochondrial transport	7	Q9Y5L4,O14737,P30419,Q8N726,Q01081,Q10713,P42765,P31947
1	336	6	GO:0048193	BP	Golgi vesicle transport	7	Q13409,Q14677,P09496,Q08379,Q14203,O60749
1	120	2	GO:0006892	BP	post-Golgi vesicle-mediated transport	8	Q14677,P09496
2.22e-16	443	24	GO:0051169	BP	nuclear transport	6	Q96FV9,Q8IWX8,Q13243,Q86U42,O75832,Q7KZ85,Q07666,P22626,Q13247,Q9BW27,P62826,P63241,P09651,P10599,Q8N726,Q92621,Q01081,Q01130,P06493,P31947,P52292,Q9UNN5,P42330,P21333
7.32e-14	1257	33	GO:0016482	BP	cytoplasmic transport	6	Q96QK1,Q13409,Q96FV9,Q8IWX8,Q9Y5L4,Q13243,Q86U42,O75832,O14737,Q7KZ85,Q07666,P22626,Q13247,Q9BW27,P62826,P63241,P09651,P10599,P61160,Q8N726,Q92621,Q01081,Q01130,Q10713,Q08379,P06493,P31947,P52292,Q9UNN5,P42330,P21333,Q14203,O60749
1.71e-16	438	24	GO:0006913	BP	nucleocytoplasmic transport	7	Q96FV9,Q8IWX8,Q13243,Q86U42,O75832,Q7KZ85,Q07666,P22626,Q13247,Q9BW27,P62826,P63241,P09651,P10599,Q8N726,Q92621,Q01081,Q01130,P06493,P31947,P52292,Q9UNN5,P42330,P21333
1.67e-14	157	16	GO:0051168	BP	nuclear export	8	Q96FV9,Q13243,Q86U42,Q7KZ85,Q07666,P22626,Q13247,Q9BW27,P62826,P63241,P09651,P10599,Q8N726,Q01081,Q01130,P31947
5.79e-10	94	11	GO:0071426	BP	ribonucleoprotein complex export from nucleus	9	Q96FV9,Q13243,Q86U42,Q7KZ85,P22626,Q13247,Q9BW27,P62826,P63241,Q01081,Q01130
1	11	1	GO:0071428	BP	rRNA-containing ribonucleoprotein complex export from nucleus	10	P62826
4.8e-09	82	10	GO:0071427	BP	mRNA-containing ribonucleoprotein complex export from nucleus	10	Q96FV9,Q13243,Q86U42,Q7KZ85,P22626,Q13247,Q9BW27,P63241,Q01081,Q01130
5.03e-13	96	13	GO:0006405	BP	RNA export from nucleus	9	Q96FV9,Q13243,Q86U42,Q7KZ85,Q07666,P22626,Q13247,Q9BW27,P62826,P63241,P09651,Q01081,Q01130
6.66e-06	281	12	GO:0051170	BP	nuclear import	8	Q8IWX8,O75832,Q9BW27,P62826,P09651,P10599,Q92621,P06493,P52292,Q9UNN5,P42330,P21333
6.61e-05	277	11	GO:1902593	BP	single-organism nuclear import	9	Q8IWX8,O75832,Q9BW27,P62826,P10599,Q92621,P06493,P52292,Q9UNN5,P42330,P21333
1	15	1	GO:0045324	BP	late endosome to vacuole transport	7	Q96QK1
1	68	3	GO:0042147	BP	retrograde transport, endosome to Golgi	7	Q96QK1,Q14203,O60749
1	6	1	GO:0034498	BP	early endosome to Golgi transport	8	O60749
1	14	1	GO:1990126	BP	retrograde transport, endosome to plasma membrane	7	Q96QK1
1	39	1	GO:0045022	BP	early endosome to late endosome transport	7	P21333
1	171	3	GO:0006888	BP	ER to Golgi vesicle-mediated transport	7	Q13409,Q08379,Q14203
1	42	1	GO:0008333	BP	endosome to lysosome transport	7	Q96QK1
1	6	1	GO:1902774	BP	late endosome to lysosome transport	8	Q96QK1
3.14e-09	1022	25	GO:0006886	BP	intracellular protein transport	6	Q96QK1,P60953,Q14247,Q8IWX8,P30040,Q9Y5L4,O75832,O14737,P09496,Q9BW27,P62826,P63241,P10599,Q8N726,Q92621,Q01081,Q10713,P06493,P31947,P52292,P07355,Q9UNN5,P42330,P21333,O60749
1.88e-05	706	17	GO:0006605	BP	protein targeting	7	Q8IWX8,Q9Y5L4,O75832,O14737,Q9BW27,P62826,P10599,Q8N726,Q92621,Q01081,Q10713,P06493,P52292,P07355,Q9UNN5,P42330,P21333
6.61e-05	277	11	GO:0044744	BP	protein targeting to nucleus	8	Q8IWX8,O75832,Q9BW27,P62826,P10599,Q92621,P06493,P52292,Q9UNN5,P42330,P21333
0.00992	56	5	GO:0006611	BP	protein export from nucleus	7	P62826,P63241,P10599,Q8N726,P31947
6.61e-05	277	11	GO:0006606	BP	protein import into nucleus	7	Q8IWX8,O75832,Q9BW27,P62826,P10599,Q92621,P06493,P52292,Q9UNN5,P42330,P21333
1	23	1	GO:0006607	BP	NLS-bearing protein import into nucleus	8	P52292
1	100	4	GO:0042991	BP	transcription factor import into nucleus	8	Q8IWX8,O75832,Q9UNN5,P21333
1	17	1	GO:0051531	BP	NFAT protein import into nucleus	9	Q8IWX8
0.166	51	4	GO:0000060	BP	protein import into nucleus, translocation	7	P62826,P10599,P06493,P42330
1	7	1	GO:0051683	BP	establishment of Golgi localization	5	P60953
1	228	3	GO:0051650	BP	establishment of vesicle localization	5	O43707,Q08379,Q14203
1	41	1	GO:0099518	BP	vesicle cytoskeletal trafficking	6	O43707
1	15	1	GO:0040023	BP	establishment of nucleus localization	5	P60953
1	10	1	GO:0007097	BP	nuclear migration	6	P60953
1	61	1	GO:0051303	BP	establishment of chromosome localization	5	P61160
0.0588	1403	18	GO:0000003	BP	reproduction	2	P16989,Q15645,Q96EP5,P15121,P35579,Q9UQE7,Q96PU8,Q13895,P47712,Q9GZT3,P33552,P51659,P61160,O00622,Q92879,Q08379,P06493,P42330
1	823	8	GO:0032504	BP	multicellular organism reproduction	3	P16989,Q15645,Q96EP5,P15121,Q96PU8,P47712,Q9GZT3,Q92879
7.39e-68	11489	175	GO:0065007	BP	biological regulation	2	P23511,Q14847,Q6FI81,P43243,Q9Y3F4,P30876,P16989,P67809,Q15717,Q96QK1,O60884,P60953,Q15645,Q96EP5,P12814,P49748,P60709,Q9NQT4,Q9NQ88,Q96FV9,P15121,Q14247,Q8IWX8,O00625,P30040,P35637,P49588,P60660,P45973,P52272,P43487,Q96RN5,O00541,P35579,Q13243,Q86U42,Q9H307,O94906,Q05639,O75832,O60828,Q13887,P56270,P29692,O14737,P36954,Q04837,P04792,P41223,O60869,O00151,O76003,Q9UQE7,P07737,Q7KZ85,P26196,O15145,…
2.51e-08	2862	40	GO:0065009	BP	regulation of molecular function	3	P60953,Q9NQ88,P30040,P43487,Q05639,O75832,O14737,Q04837,P04792,P41223,O60869,P07737,P33552,O43707,P62826,Q9UJU6,P10599,P30154,P52565,O00622,Q8N726,P06396,P04080,P30533,Q13418,P61769,Q08379,P46108,Q9NYV4,Q15019,P06493,P31947,P07355,P41236,Q9UNN5,O94992,P21333,P60903,Q99829,P14174
0.000111	1830	26	GO:0044093	BP	positive regulation of molecular function	4	P60953,Q9NQ88,P30040,P43487,Q05639,O75832,O14737,Q04837,P41223,O60869,P07737,O43707,P62826,Q9UJU6,P10599,P52565,O00622,Q8N726,P06396,Q13418,P61769,P46108,P06493,P07355,P60903,P14174
0.706	1130	14	GO:0044092	BP	negative regulation of molecular function	4	O75832,P04792,Q8N726,P04080,P30533,Q13418,P61769,Q08379,P31947,P07355,P41236,O94992,P21333,Q99829
0.000827	282	10	GO:0051098	BP	regulation of binding	4	P60953,O60869,P62826,P10599,P30533,P61769,Q08379,P07355,P60903,Q99829
1	2	1	GO:1904432	BP	regulation of ferrous iron binding	5	P61769
1	91	3	GO:0051101	BP	regulation of DNA binding	5	O60869,P10599,Q99829
0.201	168	6	GO:0043393	BP	regulation of protein binding	5	P60953,P62826,P30533,P61769,Q08379,P07355
1	17	2	GO:1900120	BP	regulation of receptor binding	6	P61769,P07355
1	2	1	GO:1904435	BP	regulation of transferrin receptor binding	7	P61769
1	8	1	GO:0043497	BP	regulation of protein heterodimerization activity	6	P60953
0.542	128	5	GO:0051100	BP	negative regulation of binding	5	P30533,P61769,Q08379,P07355,Q99829
1	47	1	GO:0043392	BP	negative regulation of DNA binding	6	Q99829
0.711	74	4	GO:0032091	BP	negative regulation of protein binding	6	P30533,P61769,Q08379,P07355
1	12	2	GO:1900121	BP	negative regulation of receptor binding	7	P61769,P07355
0.04	126	6	GO:0051099	BP	positive regulation of binding	5	O60869,P62826,P10599,P61769,P07355,P60903
1	75	2	GO:0032092	BP	positive regulation of protein binding	6	P62826,P61769
1	6	1	GO:1900122	BP	positive regulation of receptor binding	7	P61769
1	2	1	GO:1904437	BP	positive regulation of transferrin receptor binding	8	P61769
1	39	2	GO:0043388	BP	positive regulation of DNA binding	6	O60869,P10599
1	2	1	GO:1904434	BP	positive regulation of ferrous iron binding	6	P61769
5.23e-26	3631	71	GO:0065008	BP	regulation of biological quality	3	Q9Y3F4,P16989,P67809,Q15717,Q96QK1,P60953,P12814,P49748,P60709,Q9NQT4,P15121,Q14247,Q8IWX8,P49588,P45973,P35579,Q86U42,O75832,P04792,O76003,P07737,O15145,Q96PU8,Q04637,P47712,Q16181,P02795,Q9BW27,P60981,P26440,O43707,O15143,P13693,P51659,P09651,P30419,P10599,Q02241,P61160,Q14103,P13804,P52565,P21281,Q8N726,P06396,P00367,Q9Y2V2,P07108,Q92621,P21291,P11413,O15511,Q96HC4,Q8N183,Q13418,P61769,P46108,…
0.526	484	9	GO:0090066	BP	regulation of anatomical structure size	4	Q14247,P07737,O15145,P60981,O15143,P61160,P06396,O15511,Q13418
1	286	5	GO:0051235	BP	maintenance of location	4	Q8IWX8,O75832,P06396,Q9UNN5,P21333
1	119	1	GO:0051238	BP	sequestering of metal ion	5	Q8IWX8
1	96	4	GO:0045185	BP	maintenance of protein location	5	O75832,P06396,Q9UNN5,P21333
6.82e-07	732	19	GO:0050878	BP	regulation of body fluid levels	4	P60953,P12814,P60709,P45973,P35579,P04792,P07737,P47712,O43707,Q02241,P21291,Q13418,P46108,P31947,P07355,P62937,P21333,P62328,P14174
1.12e-07	578	18	GO:0007599	BP	hemostasis	5	P60953,P12814,P60709,P45973,P35579,P04792,P07737,P47712,O43707,Q02241,P21291,Q13418,P46108,P07355,P62937,P21333,P62328,P14174
1	100	1	GO:0007589	BP	body fluid secretion	5	P07355
1	70	3	GO:0090559	BP	regulation of membrane permeability	4	P30419,P42765,P31947
1	507	6	GO:0010817	BP	regulation of hormone levels	4	P15121,P51659,P00367,Q8N183,Q04828,P42330
1	339	2	GO:0009914	BP	hormone transport	5	P00367,Q8N183
1	358	2	GO:0042391	BP	regulation of membrane potential	4	Q8N726,P61769
1	93	2	GO:0051899	BP	membrane depolarization	5	Q8N726,P61769
1	56	1	GO:0051881	BP	regulation of mitochondrial membrane potential	5	Q8N726
1	22	1	GO:0051882	BP	mitochondrial depolarization	6	Q8N726
0.733	213	6	GO:0031647	BP	regulation of protein stability	4	Q96QK1,P60953,P07737,Q8N726,P06396,P21333
1	34	2	GO:0031648	BP	protein destabilization	5	Q8N726,P06396
1	128	3	GO:0050821	BP	protein stabilization	5	P07737,Q8N726,P21333
1	238	3	GO:0050803	BP	regulation of synapse structure or activity	4	P60953,P07108,Q96HC4
0.00236	1605	22	GO:0042592	BP	homeostatic process	4	Q9Y3F4,P49748,P60709,P15121,Q8IWX8,P04792,O76003,P47712,P02795,P26440,P13693,P09651,P10599,P13804,P21281,P11413,Q8N183,P61769,P31947,Q04828,P62805,P14174
0.461	373	8	GO:0060249	BP	anatomical structure homeostasis	5	Q9Y3F4,P60709,P15121,P04792,P47712,P09651,P61769,P62805
1	1022	12	GO:0048878	BP	chemical homeostasis	5	P49748,Q8IWX8,P47712,P02795,P26440,P13693,P13804,P21281,Q8N183,P61769,P31947,Q04828
1	67	1	GO:0030104	BP	water homeostasis	6	P31947
1	230	1	GO:0033500	BP	carbohydrate homeostasis	6	Q8N183
1	230	1	GO:0042593	BP	glucose homeostasis	7	Q8N183
1	679	5	GO:0050801	BP	ion homeostasis	6	Q8IWX8,P02795,P13693,P21281,P61769
1	604	5	GO:0055080	BP	cation homeostasis	7	Q8IWX8,P02795,P13693,P21281,P61769
1	618	5	GO:0098771	BP	inorganic ion homeostasis	7	Q8IWX8,P02795,P13693,P21281,P61769
1	402	2	GO:0072507	BP	divalent inorganic cation homeostasis	8	Q8IWX8,P13693
1	555	5	GO:0055065	BP	metal ion homeostasis	8	Q8IWX8,P02795,P13693,P21281,P61769
1	138	3	GO:0055076	BP	transition metal ion homeostasis	9	P02795,P21281,P61769
1	98	2	GO:0055072	BP	iron ion homeostasis	10	P21281,P61769
1	17	1	GO:0055070	BP	copper ion homeostasis	10	P02795
1	375	2	GO:0055074	BP	calcium ion homeostasis	9	Q8IWX8,P13693
1	125	4	GO:0055088	BP	lipid homeostasis	6	P49748,P26440,P13804,Q04828
1	74	1	GO:0055092	BP	sterol homeostasis	7	Q04828
1	74	1	GO:0042632	BP	cholesterol homeostasis	8	Q04828
1	238	2	GO:0048872	BP	homeostasis of number of cells	5	P11413,P14174
0.281	347	8	GO:0048871	BP	multicellular organismal homeostasis	5	Q9Y3F4,P49748,P60709,P15121,P04792,P47712,P61769,P31947
1	40	2	GO:0001659	BP	temperature homeostasis	6	P49748,P47712
1	21	1	GO:0031649	BP	heat generation	7	P47712
0.893	221	6	GO:0001894	BP	tissue homeostasis	6	Q9Y3F4,P60709,P15121,P04792,P47712,P61769
1	76	3	GO:0001895	BP	retina homeostasis	7	P60709,P04792,P61769
1	24	1	GO:0010669	BP	epithelial structure maintenance	7	Q9Y3F4
1	18	1	GO:0030277	BP	maintenance of gastrointestinal epithelium	8	Q9Y3F4
1	14	1	GO:0048875	BP	chemical homeostasis within a tissue	7	P47712
1	12	1	GO:0043129	BP	surfactant homeostasis	8	P47712
1	60	1	GO:0050891	BP	multicellular organismal water homeostasis	6	P31947
1	19	1	GO:0033561	BP	regulation of water loss via skin	7	P31947
2.14e-111	15371	229	GO:0009987	BP	cellular process	2	P23511,Q14847,Q6FI81,Q9Y3F4,P30876,P27816,O43488,P16989,P67809,Q15717,Q96QK1,O60884,P60953,Q15645,Q96EP5,P12814,P49748,Q00325,P60709,Q12789,Q9NQT4,Q13409,Q9NQ88,Q96FV9,P40939,P15121,Q14247,Q8IWX8,O00625,P30040,P35637,P30043,P49588,P60660,P45973,P31942,P52272,Q9Y5L4,P43487,Q96RN5,P30046,O00541,P35579,Q00688,Q13243,Q86U42,Q9H307,O94906,Q05639,O00567,O75832,P13797,O60828,Q13887,P56270,Q16698,P29692,…
2.72e-10	240	15	GO:0006457	BP	protein folding	3	O60884,P60709,P30040,P49588,Q00688,P04350,O14737,Q14696,P10599,P30533,P61769,Q9BQE3,P68371,P62937,Q13509
0.0108	57	5	GO:0006458	BP	'de novo' protein folding	4	P60709,P04350,Q9BQE3,P68371,Q13509
0.00753	53	5	GO:0051084	BP	'de novo' posttranslational protein folding	5	P60709,P04350,Q9BQE3,P68371,Q13509
1	51	2	GO:0061077	BP	chaperone-mediated protein folding	4	Q00688,O14737
1	22	2	GO:0042026	BP	protein refolding	4	O60884,P61769
1	522	8	GO:0006914	BP	autophagy	3	Q9NQ88,Q14247,Q05639,Q8N726,P68104,Q01081,Q9NRR5,Q08379
1	358	4	GO:0016236	BP	macroautophagy	4	Q9NQ88,Q14247,Q01081,Q9NRR5
1	9	2	GO:0061684	BP	chaperone-mediated autophagy	4	Q05639,P68104
1.08e-67	12573	181	GO:0044763	BP	single-organism cellular process	3	P23511,Q14847,Q6FI81,Q9Y3F4,P30876,P27816,O43488,P16989,P67809,Q15717,Q96QK1,O60884,P60953,Q15645,Q96EP5,P12814,P49748,Q00325,P60709,Q13409,Q9NQ88,Q96FV9,P40939,P15121,Q14247,Q8IWX8,O00625,P30040,P30043,P49588,P60660,P31942,P43487,P30046,O00541,P35579,Q13243,Q05639,O75832,P13797,O60828,Q13887,Q16698,P29692,P04350,P06732,O14737,P36954,Q04837,P04792,P41223,O60869,O76003,Q9UQE7,P07737,Q7KZ85,P26196,…
3.3e-11	1979	37	GO:0006928	BP	movement of cell or subcellular component	4	Q9Y3F4,P27816,P60953,P12814,P60709,Q13409,Q14247,P60660,P35579,O75832,P04792,P07737,O15145,P16949,Q9GZT3,P09496,Q9BW27,O43707,O15143,P10599,Q02241,P61160,P52565,O00622,P06396,Q5VTR2,P68032,O15511,Q13418,P06493,P68371,P07437,P62937,O75400,Q14203,P14174,Q13509
1	279	6	GO:0007059	BP	chromosome segregation	4	P60953,Q15645,Q9UQE7,P23246,Q9GZZ1,P61160
0.176	164	6	GO:0007163	BP	establishment or maintenance of cell polarity	4	P27816,P60953,P35579,P61160,P06396,Q13418
1	35	2	GO:0061245	BP	establishment or maintenance of bipolar cell polarity	5	P60953,Q13418
1	35	2	GO:0035088	BP	establishment or maintenance of apical/basal cell polarity	6	P60953,Q13418
1	28	1	GO:0045197	BP	establishment or maintenance of epithelial cell apical/basal polarity	7	Q13418
1	106	3	GO:0030010	BP	establishment of cell polarity	5	P27816,P35579,P06396
4.64e-11	617	22	GO:0007017	BP	microtubule-based process	4	P27816,P60953,Q13409,P43487,P35579,P04350,Q9UQE7,Q14839,P16949,P62826,Q02241,P61160,Q9HC35,Q08379,Q9BQE3,P06493,P68371,P07437,P21333,O43663,Q14203,Q13509
0.81	217	6	GO:0007018	BP	microtubule-based movement	5	P27816,P60953,Q13409,Q02241,P61160,Q14203
1	106	2	GO:0010970	BP	microtubule-based transport	6	P60953,Q14203
1	63	1	GO:0072384	BP	organelle transport along microtubule	7	P60953
1	2	1	GO:0051012	BP	microtubule sliding	6	P27816
2.58e-10	672	22	GO:0051301	BP	cell division	4	P27816,P67809,P60953,P43487,P35579,O75832,Q9UQE7,P50995,Q16181,P33552,P62826,Q02241,P61160,Q8N726,Q08379,Q9BQE3,Q15019,P06493,P31947,P07437,O75400,O43663
1	36	1	GO:0017145	BP	stem cell division	5	Q8N726
1	22	1	GO:0048103	BP	somatic stem cell division	6	Q8N726
1	3	1	GO:0010481	BP	epidermal cell division	5	P31947
1	18	2	GO:0008356	BP	asymmetric cell division	5	P61160,Q08379
8.1e-09	639	20	GO:0030029	BP	actin filament-based process	4	P60953,P12814,Q14247,P60660,P35579,P07737,O15145,P60981,O43707,O15143,P62826,P61160,P06396,P68032,O15511,Q13418,P46108,P21333,P60903,P62328
0.0159	9	3	GO:0051014	BP	actin filament severing	5	P35579,P60981,P06396
1	113	4	GO:0030048	BP	actin filament-based movement	5	P60660,P35579,O43707,P68032
1	94	2	GO:0070252	BP	actin-mediated cell contraction	6	P60660,P68032
1	39	2	GO:0033275	BP	actin-myosin filament sliding	7	P60660,P68032
1	39	2	GO:0030049	BP	muscle filament sliding	8	P60660,P68032
1	4	1	GO:0030050	BP	vesicle transport along actin filament	6	O43707
2.79e-06	989	21	GO:0001775	BP	cell activation	4	P60953,P12814,P60709,Q96FV9,P35579,P04792,P07737,Q7KZ85,P47712,O43707,Q8N726,P06396,P21291,Q13418,P61769,P46108,P17812,P62937,P21333,P62328,P14174
4.75e-20	1796	46	GO:0007049	BP	cell cycle	4	P27816,P60953,Q15645,Q13409,Q96FV9,P43487,O00541,P35579,Q13243,O75832,P04350,Q9UQE7,Q14839,P23246,P16949,Q9GZZ1,Q07666,P50995,Q16181,P33552,Q9BW27,P62826,Q02241,P61160,Q9HC35,Q8N726,Q92621,Q13418,Q08379,Q9NYV4,Q96KB5,Q15019,P06493,O75531,P31947,O94992,P68371,P07437,O75400,P21333,P62805,O43663,Q14203,Q9ULC4,P14174,Q13509
1.46e-12	1038	29	GO:0000278	BP	mitotic cell cycle	5	P27816,P60953,Q13409,P43487,O75832,P04350,Q9UQE7,P16949,Q9GZZ1,Q07666,Q16181,Q9BW27,P62826,Q02241,Q9HC35,Q8N726,Q92621,Q08379,Q96KB5,Q15019,P06493,O75531,P68371,P07437,P21333,P62805,O43663,Q14203,Q13509
7.3e-24	6420	90	GO:0007154	BP	cell communication	4	Q14847,Q9Y3F4,P16989,P67809,Q96QK1,P60953,P49748,P60709,Q9NQ88,Q96FV9,P15121,Q14247,P30040,P49588,P60660,P43487,P35579,O75832,P29692,O14737,P04792,P41223,Q9UQE7,O15145,Q04637,P23246,P16949,Q14696,Q07666,P09496,P18846,P02795,Q9BW27,O43707,O15143,P62826,P13693,Q9UJU6,P30419,P10599,P30154,Q92541,P61160,O14732,P52565,O00622,Q9BY44,P21281,Q8N726,P06396,P00367,Q9Y2V2,P07108,Q92621,P32320,Q01081,Q9NRR5,…
0.12	497	10	GO:0016049	BP	cell growth	4	P60953,Q14247,O75832,O00622,Q8N726,P32320,Q96HC4,Q13418,P31947,Q99829
9.57e-18	1319	38	GO:0022402	BP	cell cycle process	4	P27816,P60953,Q15645,Q13409,Q96FV9,P43487,P35579,O75832,P04350,Q9UQE7,Q14839,P23246,P16949,Q9GZZ1,Q07666,Q16181,P33552,Q9BW27,P62826,Q02241,P61160,Q9HC35,Q8N726,Q92621,Q13418,Q08379,Q96KB5,Q15019,P06493,O75531,P68371,P07437,O75400,P21333,O43663,Q14203,P14174,Q13509
0.79	216	6	GO:0098813	BP	nuclear chromosome segregation	5	P60953,Q15645,Q9UQE7,P23246,Q9GZZ1,P61160
1	7	1	GO:0051305	BP	chromosome movement towards spindle pole	5	P61160
1	249	3	GO:0000075	BP	cell cycle checkpoint	5	Q96FV9,O75832,P06493
1	166	3	GO:0031570	BP	DNA integrity checkpoint	6	Q96FV9,O75832,P06493
0.739	507	9	GO:0044770	BP	cell cycle phase transition	5	Q13409,O75832,P04350,Q07666,Q8N726,P06493,P68371,P07437,Q14203
1	259	3	GO:0044843	BP	cell cycle G1/S phase transition	6	O75832,Q8N726,P06493
0.00478	197	8	GO:0044839	BP	cell cycle G2/M phase transition	6	Q13409,P04350,Q07666,Q8N726,P06493,P68371,P07437,Q14203
1.19e-13	865	28	GO:1903047	BP	mitotic cell cycle process	5	P27816,P60953,Q13409,P43487,O75832,P04350,Q9UQE7,P16949,Q9GZZ1,Q07666,Q16181,Q9BW27,P62826,Q02241,Q9HC35,Q8N726,Q92621,Q08379,Q96KB5,Q15019,P06493,O75531,P68371,P07437,P21333,O43663,Q14203,Q13509
0.518	483	9	GO:0044772	BP	mitotic cell cycle phase transition	6	Q13409,O75832,P04350,Q07666,Q8N726,P06493,P68371,P07437,Q14203
0.0041	193	8	GO:0000086	BP	G2/M transition of mitotic cell cycle	7	Q13409,P04350,Q07666,Q8N726,P06493,P68371,P07437,Q14203
1	250	3	GO:0000082	BP	G1/S transition of mitotic cell cycle	7	O75832,Q8N726,P06493
0.00197	175	8	GO:0000910	BP	cytokinesis	5	P60953,P35579,O75832,Q16181,Q02241,P61160,O75400,O43663
1	40	2	GO:0061640	BP	cytoskeleton-dependent cytokinesis	6	Q02241,P61160
1	31	1	GO:0000281	BP	mitotic cytokinesis	7	Q02241
1	40	3	GO:0051653	BP	spindle localization	5	P27816,P35579,P61160
1	49	1	GO:0033059	BP	cellular pigmentation	4	Q14203
1	26	1	GO:0051875	BP	pigment granule localization	5	Q14203
1	24	1	GO:0051905	BP	establishment of pigment granule localization	6	Q14203
1	25	1	GO:0032400	BP	melanosome localization	6	Q14203
1	23	1	GO:0032401	BP	establishment of melanosome localization	7	Q14203
1	23	1	GO:0051904	BP	pigment granule transport	6	Q14203
1	22	1	GO:0032402	BP	melanosome transport	7	Q14203
1.75e-15	2026	43	GO:0008219	BP	cell death	4	Q6FI81,P16989,P67809,P60953,P12814,Q9NQ88,Q96FV9,Q14247,P30040,P49588,Q05639,O75832,P29692,O14737,P04792,P23246,P47712,Q13247,O43707,P63241,P13693,Q9UJU6,P30419,P10599,Q96TA1,P30154,P52565,O00622,Q8N726,P06396,O00422,P68032,P11413,Q13418,P42765,P49773,P06493,O76021,P31947,Q9UNN5,P42330,P21333,P14174
1	49	1	GO:0070265	BP	necrotic cell death	5	P16989
6.53e-14	1921	40	GO:0012501	BP	programmed cell death	5	Q6FI81,P16989,P67809,P60953,P12814,Q9NQ88,Q96FV9,Q14247,P30040,P49588,Q05639,O75832,O14737,P04792,P23246,P47712,O43707,P63241,P13693,Q9UJU6,P30419,Q96TA1,P30154,P52565,O00622,Q8N726,P06396,O00422,P68032,P11413,Q13418,P42765,P49773,P06493,O76021,P31947,Q9UNN5,P42330,P21333,P14174
4.58e-14	1901	40	GO:0006915	BP	apoptotic process	6	Q6FI81,P16989,P67809,P60953,P12814,Q9NQ88,Q96FV9,Q14247,P30040,P49588,Q05639,O75832,O14737,P04792,P23246,P47712,O43707,P63241,P13693,Q9UJU6,P30419,Q96TA1,P30154,P52565,O00622,Q8N726,P06396,O00422,P68032,P11413,Q13418,P42765,P49773,P06493,O76021,P31947,Q9UNN5,P42330,P21333,P14174
0.366	461	9	GO:0097285	BP	cell-type specific apoptotic process	7	P60953,Q9NQ88,P49588,Q8N726,P06396,P11413,Q13418,P42330,P14174
1	102	2	GO:0071887	BP	leukocyte apoptotic process	8	Q8N726,P14174
1	71	1	GO:0070227	BP	lymphocyte apoptotic process	9	P14174
1	24	1	GO:0001783	BP	B cell apoptotic process	10	P14174
1	84	2	GO:1904019	BP	epithelial cell apoptotic process	8	P06396,P42330
1	4	1	GO:0097283	BP	keratinocyte apoptotic process	9	P06396
1	47	1	GO:0072577	BP	endothelial cell apoptotic process	9	P42330
1	14	1	GO:0097284	BP	hepatocyte apoptotic process	9	P06396
1	52	3	GO:0010657	BP	muscle cell apoptotic process	8	Q9NQ88,Q8N726,Q13418
1	28	2	GO:0010658	BP	striated muscle cell apoptotic process	9	Q9NQ88,Q13418
1	25	2	GO:0010659	BP	cardiac muscle cell apoptotic process	10	Q9NQ88,Q13418
1	15	1	GO:0034390	BP	smooth muscle cell apoptotic process	9	Q8N726
1	31	2	GO:0033028	BP	myeloid cell apoptotic process	8	Q8N726,P14174
1	19	1	GO:0006925	BP	inflammatory cell apoptotic process	8	Q8N726
1	11	1	GO:0071888	BP	macrophage apoptotic process	9	Q8N726
1	41	1	GO:0097300	BP	programmed necrotic cell death	6	P16989
1	35	1	GO:0070266	BP	necroptotic process	7	P16989
1	295	5	GO:0070997	BP	neuron death	5	P60953,Q9NQ88,P49588,P11413,Q13418
1	226	4	GO:0051402	BP	neuron apoptotic process	6	P60953,P49588,P11413,Q13418
1	801	7	GO:0019725	BP	cellular homeostasis	4	Q8IWX8,O76003,P02795,P13693,P10599,P21281,Q8N183
1	668	5	GO:0055082	BP	cellular chemical homeostasis	5	Q8IWX8,P02795,P13693,P21281,Q8N183
1	540	4	GO:0006873	BP	cellular ion homeostasis	6	Q8IWX8,P02795,P13693,P21281
1	526	4	GO:0030003	BP	cellular cation homeostasis	7	Q8IWX8,P02795,P13693,P21281
1	383	2	GO:0072503	BP	cellular divalent inorganic cation homeostasis	8	Q8IWX8,P13693
1	487	4	GO:0006875	BP	cellular metal ion homeostasis	8	Q8IWX8,P02795,P13693,P21281
1	108	2	GO:0046916	BP	cellular transition metal ion homeostasis	9	P02795,P21281
1	73	1	GO:0006879	BP	cellular iron ion homeostasis	10	P21281
1	14	1	GO:0006878	BP	cellular copper ion homeostasis	10	P02795
1	363	2	GO:0006874	BP	cellular calcium ion homeostasis	9	Q8IWX8,P13693
1	260	1	GO:0051480	BP	regulation of cytosolic calcium ion concentration	10	Q8IWX8
1	239	1	GO:0007204	BP	positive regulation of cytosolic calcium ion concentration	11	Q8IWX8
1	124	1	GO:0060402	BP	calcium ion transport into cytosol	12	Q8IWX8
1	103	1	GO:1902656	BP	calcium ion import into cytosol	13	Q8IWX8
1	105	1	GO:0051208	BP	sequestering of calcium ion	10	Q8IWX8
1	135	1	GO:0001678	BP	cellular glucose homeostasis	6	Q8N183
1	96	3	GO:0097194	BP	execution phase of apoptosis	4	Q9UJU6,Q8N726,P06396
1	1419	9	GO:0055085	BP	transmembrane transport	4	Q14847,Q00325,Q8IWX8,O14737,Q9BW27,O43707,P21281,Q92621,P06703
1	36	1	GO:0090662	BP	ATP hydrolysis coupled transmembrane transport	5	P21281
1	60	1	GO:1990542	BP	mitochondrial transmembrane transport	5	O14737
1	1017	6	GO:0034220	BP	ion transmembrane transport	5	Q14847,Q00325,Q8IWX8,O43707,P21281,P06703
1	739	4	GO:0098660	BP	inorganic ion transmembrane transport	6	Q00325,Q8IWX8,O43707,P21281
1	723	3	GO:0098655	BP	cation transmembrane transport	6	Q8IWX8,O43707,P21281
1	657	3	GO:0098662	BP	inorganic cation transmembrane transport	7	Q8IWX8,O43707,P21281
1	125	1	GO:0035725	BP	sodium ion transmembrane transport	8	O43707
1	115	1	GO:1902600	BP	hydrogen ion transmembrane transport	8	P21281
1	32	1	GO:0015988	BP	energy coupled proton transmembrane transport, against electrochemical gradient	9	P21281
1	32	1	GO:0015991	BP	ATP hydrolysis coupled proton transport	10	P21281
1	258	1	GO:0070588	BP	calcium ion transmembrane transport	8	Q8IWX8
1	103	1	GO:0097553	BP	calcium ion transmembrane import into cytosol	9	Q8IWX8
1	233	1	GO:0098656	BP	anion transmembrane transport	6	Q00325
1	106	1	GO:0098661	BP	inorganic anion transmembrane transport	7	Q00325
1	13	1	GO:0035435	BP	phosphate ion transmembrane transport	8	Q00325
1	53	1	GO:0071806	BP	protein transmembrane transport	5	O14737
1	47	1	GO:0065002	BP	intracellular protein transmembrane transport	6	O14737
1	41	1	GO:0044743	BP	intracellular protein transmembrane import	7	O14737
1	102	4	GO:0051651	BP	maintenance of location in cell	4	O75832,P06396,Q9UNN5,P21333
1	89	4	GO:0032507	BP	maintenance of protein location in cell	5	O75832,P06396,Q9UNN5,P21333
1	45	3	GO:0051220	BP	cytoplasmic sequestering of protein	6	O75832,Q9UNN5,P21333
1	963	10	GO:0032940	BP	secretion by cell	4	P12814,P30040,P07737,O43707,P00367,Q8N183,P62937,P21333,P62328,P14174
1	371	6	GO:0006887	BP	exocytosis	5	P12814,P07737,O43707,P62937,P21333,P62328
0.00468	87	6	GO:0002576	BP	platelet degranulation	6	P12814,P07737,O43707,P62937,P21333,P62328
1	495	5	GO:0009306	BP	protein secretion	5	P30040,P00367,Q8N183,P62937,P14174
1	170	1	GO:0050663	BP	cytokine secretion	6	P14174
1	87	1	GO:0006903	BP	vesicle targeting	4	Q08379
1	74	1	GO:0048199	BP	vesicle targeting, to, from or within Golgi	5	Q08379
1	60	1	GO:0048207	BP	vesicle targeting, rough ER to cis-Golgi	6	Q08379
1	2	1	GO:0043335	BP	protein unfolding	3	P30040
1.32e-08	2673	39	GO:0002376	BP	immune system process	2	Q6FI81,P60953,P12814,P60709,Q9NQT4,Q13409,Q96FV9,O00625,P35579,O75832,Q7KZ85,O15145,P09496,P18846,P02795,Q9BW27,O15143,Q9UJU6,P10599,Q02241,P61160,Q10471,Q8N726,P06396,P11413,O15511,P61769,P46108,P13639,Q96FW1,P17812,P07355,P68371,P07437,P62937,Q15366,P62805,Q14203,P14174
1	159	5	GO:0002440	BP	production of molecular mediator of immune response	3	Q96FV9,Q7KZ85,Q10471,P61769,P14174
1	92	3	GO:0002377	BP	immunoglobulin production	4	Q96FV9,Q7KZ85,Q10471
0.0033	796	15	GO:0002252	BP	immune effector process	3	P60953,P60709,Q9NQT4,Q96FV9,Q7KZ85,O15145,O15143,P61160,O15511,P61769,P46108,P68371,P07437,Q15366,P14174
1	311	5	GO:0002443	BP	leukocyte mediated immunity	4	Q96FV9,Q7KZ85,P61769,P68371,P07437
1	240	5	GO:0002449	BP	lymphocyte mediated immunity	5	Q96FV9,Q7KZ85,P61769,P68371,P07437
1	241	6	GO:0019882	BP	antigen processing and presentation	3	Q13409,O75832,P09496,Q02241,P61769,Q14203
1	16	1	GO:0002475	BP	antigen processing and presentation via MHC class Ib	4	P61769
1	18	1	GO:0019883	BP	antigen processing and presentation of endogenous antigen	4	P61769
0.303	181	6	GO:0019884	BP	antigen processing and presentation of exogenous antigen	4	Q13409,O75832,P09496,Q02241,P61769,Q14203
0.443	194	6	GO:0048002	BP	antigen processing and presentation of peptide antigen	4	Q13409,O75832,P09496,Q02241,P61769,Q14203
1	16	1	GO:0002483	BP	antigen processing and presentation of endogenous peptide antigen	5	P61769
1	9	1	GO:0002428	BP	antigen processing and presentation of peptide antigen via MHC class Ib	5	P61769
0.244	174	6	GO:0002478	BP	antigen processing and presentation of exogenous peptide antigen	5	Q13409,O75832,P09496,Q02241,P61769,Q14203
1	8	1	GO:0002477	BP	antigen processing and presentation of exogenous peptide antigen via MHC class Ib	6	P61769
1	8	1	GO:0002481	BP	antigen processing and presentation of exogenous protein antigen via MHC class Ib, TAP-dependent	7	P61769
1	107	2	GO:0002474	BP	antigen processing and presentation of peptide antigen via MHC class I	5	O75832,P61769
1	15	1	GO:0019885	BP	antigen processing and presentation of endogenous peptide antigen via MHC class I	6	P61769
1	80	2	GO:0042590	BP	antigen processing and presentation of exogenous peptide antigen via MHC class I	6	O75832,P61769
1	76	2	GO:0002479	BP	antigen processing and presentation of exogenous peptide antigen via MHC class I, TAP-dependent	7	O75832,P61769
1	9	1	GO:0002480	BP	antigen processing and presentation of exogenous peptide antigen via MHC class I, TAP-independent	7	P61769
1	99	4	GO:0002504	BP	antigen processing and presentation of peptide or polysaccharide antigen via MHC class II	4	Q13409,P09496,Q02241,Q14203
1	96	4	GO:0002495	BP	antigen processing and presentation of peptide antigen via MHC class II	5	Q13409,P09496,Q02241,Q14203
1	92	4	GO:0019886	BP	antigen processing and presentation of exogenous peptide antigen via MHC class II	6	Q13409,P09496,Q02241,Q14203
1	85	1	GO:0001776	BP	leukocyte homeostasis	3	P14174
1	68	1	GO:0002260	BP	lymphocyte homeostasis	4	P14174
1	31	1	GO:0001782	BP	B cell homeostasis	5	P14174
1	4	1	GO:0002901	BP	mature B cell apoptotic process	6	P14174
1	129	1	GO:0002262	BP	myeloid cell homeostasis	3	P11413
1	106	1	GO:0034101	BP	erythrocyte homeostasis	4	P11413
1	750	9	GO:0045321	BP	leukocyte activation	3	P60953,Q96FV9,P35579,Q7KZ85,Q8N726,P06396,P61769,P17812,P14174
1	160	1	GO:0002274	BP	myeloid leukocyte activation	4	P14174
1	54	1	GO:0042116	BP	macrophage activation	5	P14174
1	644	9	GO:0046649	BP	lymphocyte activation	4	P60953,Q96FV9,P35579,Q7KZ85,Q8N726,P06396,P61769,P17812,P14174
1	8	2	GO:0001767	BP	establishment of lymphocyte polarity	5	P35579,P06396
1	242	5	GO:0042113	BP	B cell activation	5	Q96FV9,Q7KZ85,Q8N726,P17812,P14174
1	264	3	GO:0046651	BP	lymphocyte proliferation	5	Q8N726,P17812,P14174
1	91	3	GO:0042100	BP	B cell proliferation	6	Q8N726,P17812,P14174
1	451	6	GO:0070489	BP	T cell aggregation	4	P60953,P35579,Q8N726,P06396,P61769,P17812
1	76	2	GO:0071594	BP	thymocyte aggregation	5	Q8N726,P61769
1	451	6	GO:0042110	BP	T cell activation	5	P60953,P35579,Q8N726,P06396,P61769,P17812
0.995	7	2	GO:0001768	BP	establishment of T cell polarity	6	P35579,P06396
1	180	2	GO:0042098	BP	T cell proliferation	6	Q8N726,P17812
1	11	1	GO:0033079	BP	immature T cell proliferation	7	Q8N726
1.05e-45	8574	133	GO:0050896	BP	response to stimulus	2	Q14847,Q9Y3F4,P30876,O43488,P16989,P67809,Q96QK1,O60884,P60953,Q15645,P12814,P49748,P60709,Q9NQT4,Q9NQ88,Q96FV9,P40939,P15121,Q14247,P30040,P35637,P49588,P60660,P45973,P52272,P43487,P35579,Q13243,Q05639,O75832,Q14019,P29692,O14737,P36954,P04792,P41223,O00151,O76003,Q9UQE7,P07737,Q7KZ85,O15145,Q13895,Q04637,P23246,P47712,P16949,Q14696,Q07666,P50995,P22626,P09496,P18846,Q13247,P02795,Q9BW27,O43707,…
0.0007	1747	24	GO:0009719	BP	response to endogenous stimulus	3	Q9Y3F4,P67809,Q9NQ88,P40939,P15121,P49588,Q13243,O75832,O14737,Q04637,P47712,Q14103,O00622,P21281,P06396,P68104,Q13418,P13639,P06493,P62879,P07355,Q04828,P42330,Q06210
0.0242	1312	18	GO:0071495	BP	cellular response to endogenous stimulus	4	Q9Y3F4,P67809,Q9NQ88,P15121,Q13243,O75832,O14737,Q04637,Q14103,O00622,P21281,P68104,Q13418,P13639,P62879,Q04828,P42330,Q06210
1.16e-18	4445	68	GO:0042221	BP	response to chemical	3	Q9Y3F4,O43488,P16989,P67809,O60884,P60953,P49748,P60709,Q9NQ88,P40939,P15121,P35637,P49588,P60660,P52272,P43487,P35579,Q13243,Q05639,O75832,O14737,P04792,O15145,Q13895,Q04637,P23246,P47712,P50995,P22626,P09496,P18846,P02795,Q9BW27,O15143,P10599,P61160,Q14103,P52565,O00622,P21281,P06396,Q92621,P68104,P68032,P11413,P60842,O15511,Q8N183,Q96DG6,Q13418,P61769,P46108,P42765,P13639,Q96FW1,P06493,P17812,…
3.52e-06	1660	27	GO:1901700	BP	response to oxygen-containing compound	4	P67809,P40939,P15121,P49588,P52272,P43487,Q13243,O75832,Q13895,Q04637,P47712,P10599,Q14103,P21281,P06396,P68032,P11413,Q8N183,P61769,P13639,P06493,P62879,Q13151,Q04828,P42330,Q06210,P14174
0.207	332	8	GO:0001101	BP	response to acid chemical	4	P15121,P49588,P43487,Q14103,P06396,P13639,Q04828,P42330
1	156	4	GO:1990267	BP	response to transition metal nanoparticle	4	P47712,P02795,P61769,P06493
0.0331	1087	16	GO:1901698	BP	response to nitrogen compound	4	P67809,P40939,P15121,P49588,Q13243,O75832,Q04637,P47712,P22626,Q14103,P21281,P06396,P13639,P06493,P62879,Q06210
1	97	1	GO:0060359	BP	response to ammonium ion	5	Q14103
1.83e-07	519	17	GO:0010035	BP	response to inorganic substance	4	Q9NQ88,P15121,P35637,P43487,Q05639,P47712,P50995,P18846,P02795,P10599,Q14103,P06396,P61769,P13639,P06493,P42330,Q99829
7.38e-06	349	13	GO:0010038	BP	response to metal ion	5	Q9NQ88,P35637,P43487,P47712,P50995,P18846,P02795,Q14103,P06396,P61769,P06493,P42330,Q99829
0.101	45	4	GO:0046686	BP	response to cadmium ion	6	P06396,P61769,P06493,P42330
1	29	1	GO:0010226	BP	response to lithium ion	6	P47712
1	12	2	GO:0032025	BP	response to cobalt ion	6	Q9NQ88,P18846
0.00194	120	7	GO:0051592	BP	response to calcium ion	6	P35637,P43487,P47712,P50995,Q14103,P42330,Q99829
1	57	1	GO:0010043	BP	response to zinc ion	6	P02795
1	36	1	GO:0010039	BP	response to iron ion	6	P61769
1	32	1	GO:0046688	BP	response to copper ion	6	P06493
1	202	5	GO:0009410	BP	response to xenobiotic stimulus	4	O43488,O60884,Q9NQ88,Q96DG6,Q04828
1	449	7	GO:0042493	BP	response to drug	4	P40939,P43487,P02795,P68032,P61769,P06493,P17812
1	15	1	GO:1902074	BP	response to salt	4	Q14103
1	2	1	GO:1904383	BP	response to sodium phosphate	5	Q14103
1	255	2	GO:0009636	BP	response to toxic substance	4	P47712,P06493
1	48	1	GO:0046677	BP	response to antibiotic	5	P47712
9.81e-13	3009	48	GO:0010033	BP	response to organic substance	4	Q9Y3F4,P16989,P67809,P49748,P40939,P15121,P49588,P52272,P43487,Q13243,O75832,O14737,P04792,Q13895,Q04637,P47712,P22626,P09496,P18846,P02795,Q9BW27,Q14103,P52565,O00622,P21281,P06396,Q92621,P68104,P68032,P11413,P60842,Q8N183,Q13418,P61769,P46108,P13639,Q96FW1,P06493,P62879,Q13151,P52292,P07355,Q04828,P42330,Q06210,Q14203,Q99829,P14174
1	5	1	GO:1904587	BP	response to glycoprotein	5	P52272
1	175	2	GO:1901654	BP	response to ketone	5	P15121,Q14103
1	3	1	GO:0051595	BP	response to methylglyoxal	6	P15121
0.463	952	13	GO:0070848	BP	response to growth factor	5	Q9Y3F4,O75832,O14737,P04792,Q13895,P09496,P18846,P52565,O00622,P68104,Q13418,P46108,P13639
1	156	2	GO:0071772	BP	response to BMP	6	O00622,Q13418
1	31	1	GO:0070849	BP	response to epidermal growth factor	6	P68104
1	249	2	GO:0071559	BP	response to transforming growth factor beta	6	Q9Y3F4,O14737
1	347	1	GO:0071774	BP	response to fibroblast growth factor	6	O75832
1	40	1	GO:1990089	BP	response to nerve growth factor	6	P13639
1	140	1	GO:0046683	BP	response to organophosphorus	5	Q04828
0.925	890	12	GO:0014070	BP	response to organic cyclic compound	5	P43487,Q13895,P47712,P22626,P18846,Q14103,P52565,P06396,P11413,P13639,P06493,P42330
1	78	1	GO:0043331	BP	response to dsRNA	6	P22626
0.694	862	12	GO:0034097	BP	response to cytokine	5	P16989,O75832,Q13895,Q04637,P02795,Q9BW27,Q92621,P60842,P61769,Q96FW1,P52292,Q99829
1	5	1	GO:0036017	BP	response to erythropoietin	6	P02795
1	7	1	GO:0036015	BP	response to interleukin-3	6	P02795
1	283	3	GO:0034612	BP	response to tumor necrosis factor	6	P16989,O75832,Q99829
1	119	2	GO:0070555	BP	response to interleukin-1	6	Q13895,Q96FW1
1	873	10	GO:0033993	BP	response to lipid	5	P52272,P43487,Q13895,P47712,Q14103,P61769,P13639,Q13151,P42330,P14174
1	84	2	GO:0070542	BP	response to fatty acid	6	P43487,P42330
1	1	1	GO:1901344	BP	response to leptomycin B	7	P43487
0.121	1080	15	GO:0009725	BP	response to hormone	5	P67809,P40939,P15121,Q13243,O75832,Q04637,P47712,Q14103,P21281,P13639,P62879,P07355,Q04828,P42330,Q06210
1	36	1	GO:0034694	BP	response to prostaglandin	6	P42330
1	6	1	GO:0071798	BP	response to prostaglandin D	7	P42330
0.476	5	2	GO:0009753	BP	response to jasmonic acid	6	Q04828,P42330
1	22	2	GO:0097066	BP	response to thyroid hormone	6	P15121,P07355
1	450	4	GO:0048545	BP	response to steroid hormone	6	P47712,Q14103,P13639,P42330
1	225	2	GO:0043627	BP	response to estrogen	7	Q14103,P13639
1	181	2	GO:0031960	BP	response to corticosteroid	7	P47712,P42330
1	169	1	GO:0051384	BP	response to glucocorticoid	8	P47712
1	13	1	GO:0051597	BP	response to methylmercury	5	P47712
1	227	2	GO:0009743	BP	response to carbohydrate	5	Q8N183,Q06210
1	9	1	GO:0034285	BP	response to disaccharide	6	Q06210
1	9	1	GO:0009744	BP	response to sucrose	7	Q06210
1	200	1	GO:0034284	BP	response to monosaccharide	6	Q8N183
1	191	1	GO:0009746	BP	response to hexose	7	Q8N183
1	186	1	GO:0009749	BP	response to glucose	8	Q8N183
1	11	2	GO:0045472	BP	response to ether	5	Q14103,P13639
0.144	3	2	GO:0014076	BP	response to fluoxetine	6	Q14103,P13639
1	380	7	GO:0097305	BP	response to alcohol	5	P47712,Q14103,P06396,P68032,P11413,P13639,P06493
0.822	140	5	GO:0045471	BP	response to ethanol	6	P06396,P68032,P11413,P13639,P06493
1	149	2	GO:0032355	BP	response to estradiol	6	Q14103,P13639
0.0491	998	15	GO:0010243	BP	response to organonitrogen compound	5	P67809,P40939,P15121,P49588,Q13243,O75832,Q04637,P47712,Q14103,P21281,P06396,P13639,P06493,P62879,Q06210
1	1	1	GO:1904585	BP	response to putrescine	6	Q14103
1	52	1	GO:0014075	BP	response to amine	6	P06493
1	652	9	GO:1901652	BP	response to peptide	6	P67809,P40939,P15121,Q13243,O75832,Q04637,P21281,P62879,Q06210
1	616	8	GO:0043434	BP	response to peptide hormone	7	P67809,P40939,Q13243,O75832,Q04637,P21281,P62879,Q06210
1	49	1	GO:0033762	BP	response to glucagon	8	P62879
1	463	7	GO:0032868	BP	response to insulin	8	P67809,P40939,Q13243,O75832,Q04637,P21281,Q06210
1	117	4	GO:0043200	BP	response to amino acid	6	P49588,Q14103,P06396,P13639
1	2	1	GO:1901355	BP	response to rapamycin	6	Q14103
8.45e-10	2565	40	GO:0009605	BP	response to external stimulus	3	P60953,P60709,Q9NQT4,Q9NQ88,Q14247,P60660,P52272,P35579,O75832,Q14019,P04792,O15145,Q13895,P47712,P16949,P09496,Q9BW27,O15143,P13693,P30419,P61160,P52565,O00622,P06396,Q01081,P11413,Q9NRR5,O15511,P61769,P13639,Q96KB5,O75531,Q13151,P07355,Q04828,P42330,Q15366,P14174,P26641,Q13509
1	285	2	GO:0071496	BP	cellular response to external stimulus	4	P52565,P42330
1	552	9	GO:0009991	BP	response to extracellular stimulus	4	Q9NQ88,Q14247,P47712,P06396,Q01081,P11413,Q9NRR5,P13639,P42330
0.914	522	9	GO:0031667	BP	response to nutrient levels	5	Q9NQ88,Q14247,P47712,P06396,Q01081,P11413,Q9NRR5,P13639,P42330
1	38	1	GO:0032094	BP	response to food	6	P11413
1	205	4	GO:0007584	BP	response to nutrient	6	P47712,P06396,P13639,P42330
1	106	3	GO:0033273	BP	response to vitamin	7	P47712,P06396,P13639
1	39	1	GO:0033280	BP	response to vitamin D	8	P47712
1	13	2	GO:0051593	BP	response to folic acid	8	P06396,P13639
1	772	3	GO:0051606	BP	detection of stimulus	3	P30419,Q04828,P42330
1	197	3	GO:0009581	BP	detection of external stimulus	4	P30419,Q04828,P42330
1	88	2	GO:0043500	BP	muscle adaptation	3	O76003,P06396
1	42	1	GO:0014888	BP	striated muscle adaptation	4	P06396
1	13	1	GO:0014889	BP	muscle atrophy	4	P06396
1	9	1	GO:0014891	BP	striated muscle atrophy	5	P06396
0.00231	1226	19	GO:0009628	BP	response to abiotic stimulus	3	P16989,O60884,Q9NQ88,P15121,Q05639,P29692,O00151,P47712,Q9BW27,O43707,P30419,P10599,Q14103,P52565,Q92621,P42765,Q96KB5,Q04828,P42330
1	334	4	GO:0070482	BP	response to oxygen levels	4	Q9NQ88,O00151,O43707,P42765
1	316	4	GO:0036293	BP	response to decreased oxygen levels	5	Q9NQ88,O00151,O43707,P42765
1	234	5	GO:0009266	BP	response to temperature stimulus	4	P16989,O60884,P47712,Q9BW27,Q92621
1	511	7	GO:0009314	BP	response to radiation	4	Q9NQ88,P29692,P30419,P10599,Q96KB5,Q04828,P42330
1	374	4	GO:0009416	BP	response to light stimulus	5	P30419,Q96KB5,Q04828,P42330
1	133	1	GO:0009411	BP	response to UV	6	Q96KB5
1	149	2	GO:0010212	BP	response to ionizing radiation	5	Q9NQ88,P29692
1	53	1	GO:0010332	BP	response to gamma radiation	6	Q9NQ88
1	48	2	GO:0051602	BP	response to electrical stimulus	4	Q05639,Q14103
1	18	1	GO:0009415	BP	response to water	4	P15121
1	201	3	GO:0009582	BP	detection of abiotic stimulus	4	P30419,Q04828,P42330
1	135	3	GO:0009583	BP	detection of light stimulus	5	P30419,Q04828,P42330
1	120	3	GO:0009584	BP	detection of visible light	6	P30419,Q04828,P42330
1	221	1	GO:0009612	BP	response to mechanical stimulus	4	P52565
1	13	1	GO:0051775	BP	response to redox state	3	P52565
1	3	1	GO:0071461	BP	cellular response to redox state	4	P52565
1	72	1	GO:0014823	BP	response to activity	3	P06493
2.34e-28	4101	78	GO:0006950	BP	response to stress	3	P30876,P16989,O60884,P60953,Q15645,P12814,P49748,P60709,Q9NQT4,Q9NQ88,Q96FV9,P15121,Q14247,P30040,P49588,P45973,P35579,Q13243,O75832,Q14019,P36954,P04792,O00151,Q9UQE7,P07737,O15145,Q04637,P23246,P47712,P18846,Q13247,P02795,Q9BW27,O43707,O15143,P13693,Q9BQ69,Q9UJU6,P10599,Q02241,P61160,Q14103,O00622,Q9BY44,Q8N726,P06396,P07108,Q92621,P21291,Q01081,P11413,Q9NRR5,O15511,Q13418,P61769,P46108,P42765,…
1	181	5	GO:0035966	BP	response to topologically incorrect protein	4	P49748,P49588,P04792,Q06210,Q14203
1	170	5	GO:0006986	BP	response to unfolded protein	5	P49748,P49588,P04792,Q06210,Q14203
0.00791	1867	23	GO:0006952	BP	defense response	4	P60953,P60709,Q9NQT4,O75832,Q14019,O15145,Q04637,P47712,P18846,P02795,O15143,P10599,P61160,P07108,O15511,P61769,P46108,Q96KB5,Q13151,P68371,P07437,Q15366,P14174
1	656	4	GO:0006954	BP	inflammatory response	5	P47712,Q96KB5,Q13151,P14174
1	145	1	GO:0002526	BP	acute inflammatory response	6	P47712
1	58	1	GO:0006953	BP	acute-phase response	7	P47712
1	14	1	GO:0001660	BP	fever generation	8	P47712
0.00266	401	11	GO:0006979	BP	response to oxidative stress	4	P15121,P04792,O00151,P23246,P47712,P10599,Q14103,P11413,P13639,P06493,P42330
0.11	222	7	GO:0000302	BP	response to reactive oxygen species	5	P15121,P47712,P10599,Q14103,P13639,P06493,P42330
0.542	128	5	GO:0042542	BP	response to hydrogen peroxide	6	P15121,P47712,P10599,P13639,P06493
1	23	1	GO:0071731	BP	response to nitric oxide	6	Q14103
1	11	1	GO:0006991	BP	response to sterol depletion	4	Q9BY44
1	32	2	GO:0002931	BP	response to ischemia	4	Q9NQ88,P13639
6.36e-08	1078	24	GO:0009611	BP	response to wounding	4	P60953,P12814,P60709,P45973,P35579,Q13243,P04792,P07737,P47712,Q13247,O43707,Q02241,O00622,P06396,P21291,Q13418,P46108,Q96KB5,P06493,P07355,P62937,P21333,P62328,P14174
1	67	1	GO:0048678	BP	response to axon injury	5	P06493
1.97e-08	753	21	GO:0042060	BP	wound healing	5	P60953,P12814,P60709,P45973,P35579,P04792,P07737,P47712,Q13247,O43707,Q02241,O00622,P06396,P21291,Q13418,P46108,P07355,P62937,P21333,P62328,P14174
9.73e-08	573	18	GO:0007596	BP	blood coagulation	6	P60953,P12814,P60709,P45973,P35579,P04792,P07737,P47712,O43707,Q02241,P21291,Q13418,P46108,P07355,P62937,P21333,P62328,P14174
1.95e-07	259	13	GO:0030168	BP	platelet activation	7	P12814,P60709,P35579,P04792,P07737,P47712,O43707,P21291,Q13418,P46108,P62937,P21333,P62328
0.000372	57	6	GO:0070527	BP	platelet aggregation	8	P60709,P35579,P04792,P21291,Q13418,P21333
1	72	1	GO:0006970	BP	response to osmotic stress	4	P16989
1	24	1	GO:0006972	BP	hyperosmotic response	5	P16989
1	169	4	GO:0009408	BP	response to heat	4	O60884,P47712,Q9BW27,Q92621
1	49	1	GO:0009409	BP	response to cold	4	P16989
1	80	2	GO:0033555	BP	multicellular organismal response to stress	4	Q04637,P07108
1	39	2	GO:0042596	BP	fear response	5	Q04637,P07108
1	307	4	GO:0001666	BP	response to hypoxia	4	Q9NQ88,O00151,O43707,P42765
1	164	1	GO:0042594	BP	response to starvation	4	P42330
1	11	1	GO:0009414	BP	response to water deprivation	4	P15121
0.0417	984	15	GO:0009607	BP	response to biotic stimulus	3	Q9NQT4,Q9NQ88,P52272,Q14019,P04792,Q13895,P47712,P16949,P13693,P61769,O75531,Q13151,Q15366,P14174,P26641
0.112	947	14	GO:0043207	BP	response to external biotic stimulus	4	Q9NQT4,P52272,Q14019,P04792,Q13895,P47712,P16949,P13693,P61769,O75531,Q13151,Q15366,P14174,P26641
0.0876	1728	20	GO:0006955	BP	immune response	3	P60953,P60709,Q96FV9,O75832,Q7KZ85,O15145,P18846,P02795,O15143,Q9UJU6,P10599,P61160,O15511,P61769,P46108,Q96FW1,P68371,P07437,Q15366,P14174
1	1	1	GO:0090323	BP	prostaglandin secretion involved in immune response	4	P14174
1	203	1	GO:0006959	BP	humoral immune response	4	P61769
1	369	5	GO:0002250	BP	adaptive immune response	4	Q96FV9,Q7KZ85,Q9UJU6,P61769,Q96FW1
1	240	3	GO:0002460	BP	adaptive immune response based on somatic recombination of immune receptors built from immunoglobulin superfamily domains	5	Q96FV9,Q7KZ85,P61769
1	129	2	GO:0019724	BP	B cell mediated immunity	6	Q96FV9,Q7KZ85
1	126	2	GO:0016064	BP	immunoglobulin mediated immune response	7	Q96FV9,Q7KZ85
1	46	2	GO:0002381	BP	immunoglobulin production involved in immunoglobulin mediated immune response	8	Q96FV9,Q7KZ85
1	79	1	GO:0002456	BP	T cell mediated immunity	6	P61769
0.059	1140	16	GO:0045087	BP	innate immune response	4	P60953,P60709,O75832,O15145,P18846,P02795,O15143,P10599,P61160,O15511,P61769,P46108,P68371,P07437,Q15366,P14174
1	61	2	GO:0002228	BP	natural killer cell mediated immunity	5	P68371,P07437
1	157	2	GO:0034341	BP	response to interferon-gamma	5	P02795,P61769
1	70	2	GO:0002367	BP	cytokine production involved in immune response	4	P61769,P14174
1	22	1	GO:0061082	BP	myeloid leukocyte cytokine production	5	P14174
1	25	1	GO:0002369	BP	T cell cytokine production	5	P61769
1	211	2	GO:0002263	BP	cell activation involved in immune response	4	Q96FV9,Q7KZ85
1	209	2	GO:0002366	BP	leukocyte activation involved in immune response	4	Q96FV9,Q7KZ85
1	149	2	GO:0002285	BP	lymphocyte activation involved in immune response	5	Q96FV9,Q7KZ85
1	59	2	GO:0002312	BP	B cell activation involved in immune response	4	Q96FV9,Q7KZ85
5.14e-33	7207	108	GO:0051716	BP	cellular response to stimulus	3	Q14847,Q9Y3F4,P30876,O43488,P16989,P67809,Q96QK1,O60884,P60953,Q15645,P49748,P60709,Q9NQ88,Q96FV9,P15121,Q14247,P30040,P35637,P49588,P60660,P52272,P43487,P35579,Q13243,O75832,P29692,O14737,P36954,P04792,P41223,Q9UQE7,O15145,Q13895,Q04637,P23246,P47712,P16949,Q14696,Q07666,P22626,P09496,P18846,P02795,Q9BW27,O43707,O15143,P62826,P13693,Q9BQ69,Q9UJU6,P30419,P10599,P30154,Q92541,P61160,Q14103,O14732,…
1.54e-16	2852	52	GO:0070887	BP	cellular response to chemical stimulus	4	Q9Y3F4,O43488,P16989,P67809,O60884,P49748,Q9NQ88,P15121,P35637,P49588,P52272,P43487,Q13243,O75832,O14737,P04792,Q13895,Q04637,P23246,P47712,P22626,P09496,P18846,P02795,Q9BW27,P10599,Q14103,P52565,O00622,P21281,P06396,Q92621,P68104,P11413,P60842,Q8N183,Q96DG6,Q13418,P61769,P46108,P42765,P13639,Q96FW1,P06493,P62879,P52292,Q04828,P42330,Q06210,Q14203,Q99829,P14174
1	184	4	GO:0071229	BP	cellular response to acid chemical	5	P43487,Q14103,Q04828,P42330
1	735	10	GO:1901699	BP	cellular response to nitrogen compound	5	P67809,P15121,Q13243,O75832,Q04637,P22626,Q14103,P21281,P62879,Q06210
1	21	1	GO:1902170	BP	cellular response to reactive nitrogen species	6	Q14103
1	32	1	GO:0071242	BP	cellular response to ammonium ion	6	Q14103
0.000468	1102	19	GO:1901701	BP	cellular response to oxygen-containing compound	5	P67809,P15121,P52272,P43487,Q13243,O75832,Q13895,Q04637,P10599,Q14103,P21281,Q8N183,P61769,P06493,P62879,Q04828,P42330,Q06210,P14174
1	1	1	GO:1904588	BP	cellular response to glycoprotein	6	P52272
1	1	1	GO:1990831	BP	cellular response to carcinoembryonic antigen	7	P52272
1	74	1	GO:1901655	BP	cellular response to ketone	6	P15121
1	196	4	GO:0071466	BP	cellular response to xenobiotic stimulus	5	O43488,O60884,Q96DG6,Q04828
1	72	2	GO:0035690	BP	cellular response to drug	5	P43487,P02795
1	24	1	GO:0097237	BP	cellular response to toxic substance	5	P47712
1	15	1	GO:0071236	BP	cellular response to antibiotic	6	P47712
0.00109	162	8	GO:0071241	BP	cellular response to inorganic substance	5	Q9NQ88,P35637,P02795,Q14103,P06396,P61769,P42330,Q99829
0.00548	140	7	GO:0071248	BP	cellular response to metal ion	6	Q9NQ88,P35637,P02795,P06396,P61769,P42330,Q99829
1	5	1	GO:0071279	BP	cellular response to cobalt ion	7	Q9NQ88
1	16	2	GO:0071276	BP	cellular response to cadmium ion	7	P06396,P42330
1	50	3	GO:0071277	BP	cellular response to calcium ion	7	P35637,P42330,Q99829
1	10	1	GO:0071281	BP	cellular response to iron ion	7	P61769
1	17	1	GO:0071294	BP	cellular response to zinc ion	7	P02795
4.96e-11	2347	40	GO:0071310	BP	cellular response to organic substance	5	Q9Y3F4,P16989,P67809,P49748,P15121,P49588,P52272,P43487,Q13243,O75832,O14737,P04792,Q13895,Q04637,P22626,P09496,P18846,P02795,Q9BW27,Q14103,P52565,O00622,P21281,Q92621,P68104,P60842,Q8N183,Q13418,P61769,P46108,P13639,Q96FW1,P62879,P52292,Q04828,P42330,Q06210,Q14203,Q99829,P14174
1	126	1	GO:0097306	BP	cellular response to alcohol	6	Q14103
1	434	7	GO:0071396	BP	cellular response to lipid	6	P52272,P43487,Q13895,Q14103,P61769,P42330,P14174
1	52	2	GO:0071398	BP	cellular response to fatty acid	7	P43487,P42330
1	425	6	GO:0071407	BP	cellular response to organic cyclic compound	6	P43487,Q13895,P22626,Q14103,P52565,P42330
1	42	1	GO:0071359	BP	cellular response to dsRNA	7	P22626
1	1	1	GO:0072750	BP	cellular response to leptomycin B	7	P43487
0.217	760	12	GO:0071345	BP	cellular response to cytokine stimulus	6	P16989,O75832,Q13895,Q04637,P02795,Q9BW27,Q92621,P60842,P61769,Q96FW1,P52292,Q99829
1	262	3	GO:0071356	BP	cellular response to tumor necrosis factor	7	P16989,O75832,Q99829
1	7	1	GO:0036016	BP	cellular response to interleukin-3	7	P02795
1	90	2	GO:0071347	BP	cellular response to interleukin-1	7	Q13895,Q96FW1
1	5	1	GO:0036018	BP	cellular response to erythropoietin	7	P02795
1	136	2	GO:0071346	BP	cellular response to interferon-gamma	7	P02795,P61769
0.357	927	13	GO:0071363	BP	cellular response to growth factor stimulus	6	Q9Y3F4,O75832,O14737,P04792,Q13895,P09496,P18846,P52565,O00622,P68104,Q13418,P46108,P13639
1	40	1	GO:0035924	BP	cellular response to vascular endothelial growth factor stimulus	7	P04792
1	37	1	GO:1990090	BP	cellular response to nerve growth factor stimulus	7	P13639
1	5	1	GO:1990416	BP	cellular response to brain-derived neurotrophic factor stimulus	8	P13639
1	26	1	GO:0071364	BP	cellular response to epidermal growth factor stimulus	7	P68104
1	246	2	GO:0071560	BP	cellular response to transforming growth factor beta stimulus	7	Q9Y3F4,O14737
1	156	2	GO:0071773	BP	cellular response to BMP stimulus	7	O00622,Q13418
1	340	1	GO:0044344	BP	cellular response to fibroblast growth factor stimulus	7	O75832
1	744	10	GO:0032870	BP	cellular response to hormone stimulus	6	P67809,Q13243,O75832,Q04637,Q14103,P21281,P62879,Q04828,P42330,Q06210
0.476	5	2	GO:0071395	BP	cellular response to jasmonic acid stimulus	7	Q04828,P42330
1	168	2	GO:0071383	BP	cellular response to steroid hormone stimulus	7	Q14103,P42330
1	42	1	GO:0071391	BP	cellular response to estrogen stimulus	8	Q14103
1	31	1	GO:0071392	BP	cellular response to estradiol stimulus	9	Q14103
1	63	1	GO:0071384	BP	cellular response to corticosteroid stimulus	8	P42330
1	25	1	GO:0071379	BP	cellular response to prostaglandin stimulus	7	P42330
1	6	1	GO:0071799	BP	cellular response to prostaglandin D stimulus	8	P42330
1	134	1	GO:0071322	BP	cellular response to carbohydrate stimulus	6	Q8N183
1	124	1	GO:0071326	BP	cellular response to monosaccharide stimulus	7	Q8N183
1	122	1	GO:0071331	BP	cellular response to hexose stimulus	8	Q8N183
1	120	1	GO:0071333	BP	cellular response to glucose stimulus	9	Q8N183
1	1	1	GO:0097238	BP	cellular response to methylglyoxal	6	P15121
1	680	9	GO:0071417	BP	cellular response to organonitrogen compound	6	P67809,P15121,Q13243,O75832,Q04637,Q14103,P21281,P62879,Q06210
1	528	8	GO:1901653	BP	cellular response to peptide	7	P67809,P15121,Q13243,O75832,Q04637,P21281,P62879,Q06210
1	510	7	GO:0071375	BP	cellular response to peptide hormone stimulus	8	P67809,Q13243,O75832,Q04637,P21281,P62879,Q06210
1	410	6	GO:0032869	BP	cellular response to insulin stimulus	9	P67809,Q13243,O75832,Q04637,P21281,Q06210
1	38	1	GO:0071377	BP	cellular response to glucagon stimulus	9	P62879
1	1	1	GO:1904586	BP	cellular response to putrescine	7	Q14103
1	55	1	GO:0071230	BP	cellular response to amino acid stimulus	7	Q14103
1	156	2	GO:0071453	BP	cellular response to oxygen levels	5	Q9NQ88,P42765
1	147	2	GO:0036294	BP	cellular response to decreased oxygen levels	6	Q9NQ88,P42765
1	298	5	GO:0071214	BP	cellular response to abiotic stimulus	4	P16989,P29692,P30419,P52565,Q96KB5
1	165	3	GO:0071478	BP	cellular response to radiation	5	P29692,P30419,Q96KB5
1	117	2	GO:0071482	BP	cellular response to light stimulus	6	P30419,Q96KB5
1	69	1	GO:0034644	BP	cellular response to UV	7	Q96KB5
1	55	1	GO:0071479	BP	cellular response to ionizing radiation	6	P29692
1	82	1	GO:0071260	BP	cellular response to mechanical stimulus	5	P52565
1	183	5	GO:0071216	BP	cellular response to biotic stimulus	4	Q9NQ88,P52272,Q13895,P61769,P14174
1	6	1	GO:0072396	BP	response to cell cycle checkpoint signaling	5	Q9NQ88
1	6	1	GO:0072402	BP	response to DNA integrity checkpoint signaling	6	Q9NQ88
1	6	1	GO:0072423	BP	response to DNA damage checkpoint signaling	7	Q9NQ88
6.01e-16	1968	43	GO:0033554	BP	cellular response to stress	4	P30876,P16989,P60953,Q15645,P49748,Q9NQ88,Q96FV9,P15121,Q14247,P30040,P49588,O75832,P36954,P04792,Q9UQE7,P23246,P18846,Q9BW27,P13693,Q9BQ69,Q9UJU6,P10599,Q14103,Q9BY44,Q8N726,Q92621,Q01081,P11413,Q9NRR5,P42765,P13639,Q96FW1,Q96KB5,P06493,O76021,P31947,P52292,P42330,P62805,Q06210,Q14203,Q9ULC4,P14174
1	10	1	GO:0071501	BP	cellular response to sterol depletion	5	Q9BY44
1	259	6	GO:0034976	BP	response to endoplasmic reticulum stress	5	P49748,P30040,P49588,P13639,Q06210,Q14203
2.34e-05	811	18	GO:0006974	BP	cellular response to DNA damage stimulus	5	P30876,Q15645,Q9NQ88,Q96FV9,O75832,P36954,Q9UQE7,P23246,P13693,Q9BQ69,Q8N726,Q96FW1,P06493,P31947,P52292,P62805,Q9ULC4,P14174
1	156	3	GO:0000077	BP	DNA damage checkpoint	6	Q96FV9,O75832,P06493
1	35	1	GO:0031572	BP	G2 DNA damage checkpoint	7	P06493
1	78	1	GO:0044783	BP	G1 DNA damage checkpoint	7	O75832
1	113	2	GO:0034605	BP	cellular response to heat	5	Q9BW27,Q92621
0.0146	229	8	GO:0034599	BP	cellular response to oxidative stress	5	P15121,P04792,P23246,P10599,Q14103,P11413,P06493,P42330
1	63	3	GO:0036473	BP	cell death in response to oxidative stress	6	P04792,P23246,P10599
0.648	133	5	GO:0034614	BP	cellular response to reactive oxygen species	6	P15121,P10599,Q14103,P06493,P42330
1	77	3	GO:0070301	BP	cellular response to hydrogen peroxide	7	P15121,P10599,P06493
1	21	1	GO:0036474	BP	cell death in response to hydrogen peroxide	8	P10599
1	17	1	GO:0071732	BP	cellular response to nitric oxide	7	Q14103
1	24	1	GO:0071470	BP	cellular response to osmotic stress	5	P16989
1	8	1	GO:0071474	BP	cellular hyperosmotic response	6	P16989
1	141	4	GO:0035967	BP	cellular response to topologically incorrect protein	5	P49748,P49588,Q06210,Q14203
1	132	4	GO:0034620	BP	cellular response to unfolded protein	6	P49748,P49588,Q06210,Q14203
1	140	2	GO:0071456	BP	cellular response to hypoxia	5	Q9NQ88,P42765
1	207	1	GO:0031668	BP	cellular response to extracellular stimulus	4	P42330
1	177	1	GO:0031669	BP	cellular response to nutrient levels	5	P42330
1	123	1	GO:0009267	BP	cellular response to starvation	6	P42330
1	347	5	GO:0048511	BP	rhythmic process	2	P23511,P23246,P47712,Q14103,Q06210
1	212	3	GO:0007623	BP	circadian rhythm	3	P23246,Q14103,Q06210
1	111	3	GO:0001906	BP	cell killing	2	P61769,P68371,P07437
1	86	3	GO:0001909	BP	leukocyte mediated cytotoxicity	3	P61769,P68371,P07437
1	31	1	GO:0001913	BP	T cell mediated cytotoxicity	4	P61769
1	58	2	GO:0042267	BP	natural killer cell mediated cytotoxicity	4	P68371,P07437
6.5e-94	12055	201	GO:0008152	BP	metabolic process	2	P23511,Q6FI81,P43243,Q9Y3F4,P30876,O43488,P16989,P67809,Q15717,O60884,P60953,Q15645,Q96EP5,P12814,P49748,Q00325,P60709,Q12789,Q9NQT4,Q13409,Q9NQ88,Q96FV9,P40939,P15121,Q14247,Q8IWX8,O00625,P30040,P35637,P30043,P49588,P45973,P31942,P52272,Q9Y5L4,P43487,Q96RN5,P30046,O00541,P35579,Q00688,Q13243,Q86U42,Q9H307,O94906,Q05639,O00567,O75832,O60828,Q13887,P56270,Q16698,P29692,P04350,P06732,O14737,P36954,…
1.14e-78	10482	179	GO:0044238	BP	primary metabolic process	3	P23511,Q9Y3F4,P30876,O43488,P16989,P67809,Q15717,P60953,Q15645,Q96EP5,P12814,P49748,Q00325,P60709,Q12789,Q9NQT4,Q13409,Q9NQ88,Q96FV9,P40939,P15121,Q8IWX8,O00625,P30040,P35637,P49588,P45973,P31942,P52272,Q9Y5L4,Q96RN5,O00541,P35579,Q00688,Q13243,Q86U42,Q9H307,O94906,Q05639,O00567,O75832,O60828,Q13887,P56270,Q16698,P29692,P04350,P06732,O14737,P36954,Q04837,P04792,P41223,O60869,O00151,Q9UQE7,P07737,…
3.15e-83	10808	185	GO:0071704	BP	organic substance metabolic process	3	P23511,P43243,Q9Y3F4,P30876,O43488,P16989,P67809,Q15717,O60884,P60953,Q15645,Q96EP5,P12814,P49748,Q00325,P60709,Q12789,Q9NQT4,Q13409,Q9NQ88,Q96FV9,P40939,P15121,Q8IWX8,O00625,P30040,P35637,P30043,P49588,P45973,P31942,P52272,Q9Y5L4,Q96RN5,P30046,O00541,P35579,Q00688,Q13243,Q86U42,Q9H307,O94906,Q05639,O00567,O75832,O60828,Q13887,P56270,Q16698,P29692,P04350,P06732,O14737,P36954,Q04837,P04792,P41223,…
1.44e-64	9286	158	GO:0043170	BP	macromolecule metabolic process	4	P23511,P43243,Q9Y3F4,P30876,P16989,P67809,Q15717,P60953,Q15645,Q96EP5,P12814,P49748,Q00325,P60709,Q12789,Q9NQT4,Q13409,Q9NQ88,Q96FV9,Q8IWX8,O00625,P30040,P35637,P49588,P45973,P31942,P52272,Q9Y5L4,Q96RN5,O00541,P35579,Q00688,Q13243,Q86U42,Q9H307,O94906,Q05639,O00567,O75832,O60828,Q13887,P56270,P29692,P04350,O14737,P36954,Q04837,P04792,P41223,O60869,O00151,Q9UQE7,P07737,Q7KZ85,P26196,Q14839,Q96PU8,…
6.1e-57	5430	121	GO:0010467	BP	gene expression	5	P23511,P43243,Q9Y3F4,P30876,P16989,P67809,Q15717,P60953,Q15645,Q96EP5,Q00325,P60709,Q12789,Q9NQT4,Q9NQ88,Q96FV9,Q8IWX8,O00625,P30040,P35637,P49588,P45973,P31942,P52272,Q96RN5,O00541,P35579,Q13243,Q86U42,Q9H307,O94906,Q05639,O00567,O75832,O60828,Q13887,P56270,P29692,O14737,P36954,P04792,P41223,O60869,O00151,P07737,Q7KZ85,P26196,Q14839,Q96PU8,Q13895,Q04637,P24534,P23246,Q9GZT3,Q7Z2T5,Q07666,P22626,…
4.8e-09	82	10	GO:0006406	BP	mRNA export from nucleus	6	Q96FV9,Q13243,Q86U42,Q7KZ85,P22626,Q13247,Q9BW27,P63241,Q01081,Q01130
1	14	1	GO:0016973	BP	poly(A)+ mRNA export from nucleus	7	Q86U42
2.42e-09	4139	51	GO:0043412	BP	macromolecule modification	5	Q9Y3F4,P60953,Q9NQT4,Q13409,P30040,P49588,Q00688,O00567,O75832,P04792,Q9UQE7,Q7KZ85,P23246,Q7Z2T5,Q9GZZ1,P18846,P33552,Q9BW27,P63241,Q9BQ69,Q9UJU6,P30419,P10599,P30154,Q92541,O00622,Q8WXI9,Q10471,Q9BY44,Q8N726,Q92621,Q5VTR2,P11413,Q13418,Q08379,P46108,Q9NYV4,P13639,Q96FW1,Q96KB5,P06493,P31947,P07355,P41236,Q9UNN5,O94992,P62937,P62805,Q06210,Q14203,P14174
1	87	1	GO:0098732	BP	macromolecule deacylation	6	P23246
2.45e-24	5770	86	GO:0019538	BP	protein metabolic process	5	Q9Y3F4,P16989,Q15717,P60953,P49748,Q00325,P60709,Q13409,P30040,P49588,Q9Y5L4,P35579,Q00688,Q05639,O75832,P29692,P04350,O14737,P04792,Q9UQE7,Q7KZ85,P26196,Q96PU8,Q04637,P24534,P23246,Q9GZZ1,Q07666,P22626,P18846,P33552,Q9BW27,P62826,P63241,Q9BQ69,Q9UJU6,P30419,P10599,P30154,Q92541,Q14103,P23381,P22695,O00622,Q10471,Q9BY44,Q8N726,P06396,Q92879,Q92621,Q5VTR2,P68104,P11413,P04080,Q9NRR5,P60842,Q10713,…
1	115	1	GO:0042107	BP	cytokine metabolic process	6	P04792
1	113	1	GO:0042089	BP	cytokine biosynthetic process	7	P04792
1	19	1	GO:0042533	BP	tumor necrosis factor biosynthetic process	8	P04792
1	134	1	GO:0042157	BP	lipoprotein metabolic process	6	P30419
0.401	1632	18	GO:0006508	BP	proteolysis	6	P35579,O75832,O14737,P22695,O00622,Q8N726,P06396,Q5VTR2,P04080,Q9NRR5,Q10713,Q96FW1,Q96KB5,P06493,P31947,Q9UNN5,Q15366,Q99829
1	55	1	GO:0033619	BP	membrane protein proteolysis	7	P35579
1	39	1	GO:0006509	BP	membrane protein ectodomain proteolysis	8	P35579
1	354	5	GO:0051604	BP	protein maturation	6	P35579,P22695,Q8N726,P06396,Q10713
1	328	5	GO:0016485	BP	protein processing	7	P35579,P22695,Q8N726,P06396,Q10713
0.048	2	2	GO:1900756	BP	protein processing in phagocytic vesicle	8	P35579,P06396
1	124	1	GO:0031638	BP	zymogen activation	8	Q8N726
2.8e-07	3959	46	GO:0036211	BP	protein modification process	6	Q9Y3F4,P60953,Q13409,P30040,Q00688,O75832,P04792,Q9UQE7,Q7KZ85,P23246,Q9GZZ1,P18846,P33552,Q9BW27,P63241,Q9BQ69,Q9UJU6,P30419,P10599,P30154,Q92541,O00622,Q10471,Q9BY44,Q8N726,Q92621,Q5VTR2,P11413,Q13418,Q08379,P46108,Q9NYV4,P13639,Q96FW1,Q96KB5,P06493,P31947,P07355,P41236,Q9UNN5,O94992,P62937,P62805,Q06210,Q14203,P14174
0.00026	559	14	GO:1901615	BP	organic hydroxy compound metabolic process	4	P49748,Q9NQ88,P15121,P30046,Q00341,P47712,P51659,O14732,P07108,P11413,P42765,P62633,Q04828,P42330
0.000811	1381	21	GO:1901135	BP	carbohydrate derivative metabolic process	4	O43488,Q13409,Q9NQ88,P15121,P47712,Q9BQ69,Q9NTK5,P22695,Q10471,P60891,P21281,P32320,P11413,Q08379,Q96G03,P49773,P17812,Q04828,P42330,Q06210,Q14203
1	41	1	GO:0006040	BP	amino sugar metabolic process	5	Q06210
1	27	1	GO:1901071	BP	glucosamine-containing compound metabolic process	6	Q06210
1	5	1	GO:0006041	BP	glucosamine metabolic process	7	Q06210
7.16e-59	6143	129	GO:1901360	BP	organic cyclic compound metabolic process	4	P23511,Q9Y3F4,P30876,P16989,P67809,P60953,Q15645,Q96EP5,P12814,P49748,Q12789,Q9NQT4,Q9NQ88,Q96FV9,P15121,Q8IWX8,O00625,P35637,P30043,P49588,P45973,P31942,P52272,Q96RN5,P30046,O00541,Q13243,Q86U42,Q9H307,O94906,O00567,O75832,O60828,Q13887,P56270,P29692,P36954,Q04837,P41223,O60869,O00151,Q9UQE7,P07737,Q7KZ85,P26196,Q14839,Q96PU8,Q13895,Q04637,Q00341,P23246,Q9GZT3,Q7Z2T5,Q07666,P22626,P18846,Q13247,…
0.00338	1020	17	GO:0005975	BP	carbohydrate metabolic process	4	O43488,Q13409,Q9NQ88,P15121,Q04446,Q14376,Q9BW27,O14732,Q10471,P60891,Q92621,P11413,Q08379,Q96G03,P41236,Q06210,Q14203
1	117	4	GO:0005976	BP	polysaccharide metabolic process	5	Q04446,Q96G03,P41236,Q06210
1	87	4	GO:0044042	BP	glucan metabolic process	6	Q04446,Q96G03,P41236,Q06210
4.22e-51	6390	123	GO:0009058	BP	biosynthetic process	3	P23511,Q6FI81,Q9Y3F4,P30876,P16989,P67809,Q15717,P60953,Q15645,P12814,P49748,Q00325,Q12789,Q13409,Q9NQ88,Q96FV9,P40939,P15121,O00625,P35637,P49588,P45973,Q96RN5,P30046,Q13243,Q86U42,Q9H307,O94906,Q05639,O75832,O60828,Q13887,P56270,P29692,P06732,P36954,Q04837,P04792,P41223,O60869,O00151,Q9UQE7,P07737,Q7KZ85,P26196,Q14839,Q96PU8,Q04446,Q04637,P24534,P23246,P19623,P47712,Q9GZT3,Q07666,P22626,P18846,…
8.47e-51	6305	122	GO:1901576	BP	organic substance biosynthetic process	4	P23511,Q9Y3F4,P30876,P16989,P67809,Q15717,P60953,Q15645,P12814,P49748,Q00325,Q12789,Q13409,Q9NQ88,Q96FV9,P40939,P15121,O00625,P35637,P49588,P45973,Q96RN5,P30046,Q13243,Q86U42,Q9H307,O94906,Q05639,O75832,O60828,Q13887,P56270,P29692,P06732,P36954,Q04837,P04792,P41223,O60869,O00151,Q9UQE7,P07737,Q7KZ85,P26196,Q14839,Q96PU8,Q04446,Q04637,P24534,P23246,P19623,P47712,Q9GZT3,Q07666,P22626,P18846,Q13247,…
0.0015	231	9	GO:1901617	BP	organic hydroxy compound biosynthetic process	5	P15121,P30046,P47712,P51659,O14732,P11413,P42765,P62633,P42330
8.25e-29	4506	82	GO:1901362	BP	organic cyclic compound biosynthetic process	5	P23511,Q9Y3F4,P30876,P16989,P67809,Q15645,P12814,Q12789,Q9NQ88,Q96FV9,P15121,O00625,P35637,P45973,Q96RN5,P30046,Q13243,Q86U42,Q9H307,O94906,O75832,O60828,Q13887,P56270,P29692,P36954,P41223,O60869,O00151,P07737,Q7KZ85,Q14839,P23246,Q9GZT3,Q07666,P22626,P18846,Q13247,Q9BW27,O43707,Q14498,P62826,P51659,Q13610,P10599,Q92541,Q14103,O00622,Q8WXI9,Q9BY44,P60891,Q8N726,O00422,O14979,Q9Y2V2,Q92621,Q5VTR2,…
7.02e-43	5283	105	GO:0009059	BP	macromolecule biosynthetic process	5	P23511,Q9Y3F4,P30876,P16989,P67809,Q15717,P60953,Q15645,P12814,Q00325,Q12789,Q13409,Q9NQ88,Q96FV9,O00625,P35637,P49588,P45973,Q96RN5,Q13243,Q86U42,Q9H307,O94906,Q05639,O75832,O60828,Q13887,P56270,P29692,P36954,Q04837,P04792,P41223,O60869,O00151,Q9UQE7,P07737,Q7KZ85,P26196,Q14839,Q96PU8,Q04446,Q04637,P24534,P23246,Q9GZT3,Q07666,P22626,P18846,Q13247,Q9BW27,O43707,Q14498,P62826,P63241,P09651,Q13610,…
1	3	1	GO:0002378	BP	immunoglobulin biosynthetic process	6	Q10471
1	894	9	GO:1901137	BP	carbohydrate derivative biosynthetic process	5	Q13409,Q10471,P60891,P32320,P11413,Q08379,P17812,Q06210,Q14203
1	8	1	GO:0046349	BP	amino sugar biosynthetic process	6	Q06210
1	3	1	GO:1901073	BP	glucosamine-containing compound biosynthetic process	7	Q06210
1	1	1	GO:0006042	BP	glucosamine biosynthetic process	8	Q06210
7.03e-11	2256	39	GO:0009056	BP	catabolic process	3	P60953,P49748,Q9NQT4,Q9NQ88,P40939,Q14247,P30043,Q05639,O75832,Q16698,P26196,Q04637,P47712,Q14376,Q9GZT3,P26440,P51659,Q14103,P13804,O14732,Q8N726,P00367,Q5VTR2,P68104,P32320,Q01081,Q9NRR5,P60842,Q08379,Q96KB5,Q96G03,P49773,P06493,Q01780,P07355,Q9UNN5,P42330,P21333,Q15366
8.77e-10	1864	34	GO:1901575	BP	organic substance catabolic process	4	P60953,P49748,Q9NQT4,Q9NQ88,P40939,P30043,O75832,Q16698,P26196,Q04637,P47712,Q14376,Q9GZT3,P26440,P51659,Q14103,P13804,O14732,Q8N726,P00367,Q5VTR2,P32320,Q9NRR5,P60842,Q96KB5,Q96G03,P49773,P06493,Q01780,P07355,Q9UNN5,P42330,P21333,Q15366
0.00255	486	12	GO:1901361	BP	organic cyclic compound catabolic process	5	Q9NQT4,Q9NQ88,P30043,P26196,Q04637,Q9GZT3,Q14103,Q8N726,P32320,P60842,P49773,Q01780
0.00166	1199	19	GO:0009057	BP	macromolecule catabolic process	5	P60953,Q9NQT4,O75832,P26196,Q04637,Q9GZT3,Q14103,Q8N726,Q5VTR2,Q9NRR5,P60842,Q96KB5,Q96G03,P06493,Q01780,P07355,Q9UNN5,P21333,Q15366
1	827	11	GO:0030163	BP	protein catabolic process	6	P60953,O75832,Q8N726,Q5VTR2,Q9NRR5,Q96KB5,P06493,P07355,Q9UNN5,P21333,Q15366
1	72	2	GO:1901616	BP	organic hydroxy compound catabolic process	5	O14732,P42330
1	182	3	GO:1901136	BP	carbohydrate derivative catabolic process	5	P32320,Q96G03,P49773
1	146	3	GO:0016052	BP	carbohydrate catabolic process	5	Q9NQ88,Q14376,Q96G03
1	32	1	GO:0000272	BP	polysaccharide catabolic process	6	Q96G03
1	30	1	GO:0009251	BP	glucan catabolic process	7	Q96G03
1.96e-32	5684	96	GO:0044710	BP	single-organism metabolic process	3	P23511,Q6FI81,P30876,O43488,O60884,P60953,Q15645,P49748,Q13409,Q9NQ88,Q96FV9,P40939,P15121,Q14247,O00625,P30040,P30043,P49588,P30046,Q05639,O75832,Q16698,P06732,P36954,O60869,O76003,Q9UQE7,Q7KZ85,Q96PU8,Q04446,Q00341,P23246,P19623,P47712,Q14376,Q9GZZ1,P22626,P18846,P02795,Q9BW27,P26440,Q96I15,P62826,P63241,Q9BQ69,P51659,P09651,Q9UJU6,P10599,Q92541,Q9NTK5,P23381,P13804,P22695,O14732,O00622,Q10471,…
0.000414	58	6	GO:0019748	BP	secondary metabolic process	4	O43488,Q9NQ88,P15121,P30046,Q04828,P42330
0.000159	10	4	GO:0030638	BP	polyketide metabolic process	5	O43488,P15121,Q04828,P42330
1	69	3	GO:0042440	BP	pigment metabolic process	4	P30043,P30046,P60891
1.47e-05	1776	27	GO:0044711	BP	single-organism biosynthetic process	4	P49748,P40939,P15121,P30046,Q9UQE7,Q96PU8,Q04446,P47712,P63241,P51659,P09651,O14732,O00622,P60891,P00367,P32320,P16152,P11413,P42765,P13639,Q96G03,P62633,P17812,P42330,Q06210,Q99829,P14174
1	53	2	GO:0046148	BP	pigment biosynthetic process	5	P30046,P60891
1	25	1	GO:0044550	BP	secondary metabolite biosynthetic process	5	P30046
0.117	829	13	GO:0044723	BP	single-organism carbohydrate metabolic process	4	Q13409,Q9NQ88,P15121,Q04446,Q14376,O14732,Q10471,P11413,Q08379,Q96G03,P41236,Q06210,Q14203
1	429	5	GO:0070085	BP	glycosylation	5	Q13409,Q10471,Q08379,Q06210,Q14203
1	424	5	GO:0043413	BP	macromolecule glycosylation	6	Q13409,Q10471,Q08379,Q06210,Q14203
0.597	205	6	GO:0016051	BP	carbohydrate biosynthetic process	5	P15121,Q04446,O14732,P11413,Q96G03,Q06210
1	78	3	GO:0000271	BP	polysaccharide biosynthetic process	6	Q04446,Q96G03,Q06210
1	106	4	GO:1901568	BP	fatty acid derivative metabolic process	4	P47712,P16152,P42330,P14174
0.224	55	4	GO:1901570	BP	fatty acid derivative biosynthetic process	5	P47712,P16152,P42330,P14174
0.00128	1178	19	GO:0044712	BP	single-organism catabolic process	4	P49748,Q9NQ88,P40939,Q14247,P30043,Q16698,P47712,Q14376,P26440,P51659,P13804,O14732,Q8N726,P00367,P32320,Q01081,Q96G03,P49773,P42330
1	8	1	GO:0046149	BP	pigment catabolic process	5	P30043
1	138	3	GO:0044724	BP	single-organism carbohydrate catabolic process	5	Q9NQ88,Q14376,Q96G03
0.000412	409	12	GO:1901657	BP	glycosyl compound metabolic process	4	O43488,Q9NQ88,P15121,Q9BQ69,Q9NTK5,P22695,P60891,P21281,P32320,P17812,Q04828,P42330
1	41	1	GO:1901658	BP	glycosyl compound catabolic process	5	P32320
1	130	3	GO:1901659	BP	glycosyl compound biosynthetic process	5	P60891,P32320,P17812
0.00176	17	4	GO:0016137	BP	glycoside metabolic process	5	O43488,P15121,Q04828,P42330
0.000159	10	4	GO:0030647	BP	aminoglycoside antibiotic metabolic process	6	O43488,P15121,Q04828,P42330
1	69	1	GO:0070988	BP	demethylation	4	P62805
2.42e-18	2701	53	GO:0044281	BP	small molecule metabolic process	4	P23511,Q6FI81,O43488,P49748,Q9NQ88,P40939,P15121,P30043,P49588,O75832,Q16698,P06732,Q96PU8,Q04446,Q00341,P19623,P47712,Q14376,P02795,Q9BW27,P26440,Q96I15,P62826,Q9BQ69,P51659,P10599,Q9NTK5,P23381,P13804,P22695,O14732,P60891,P21281,P00367,P07108,Q92621,P32320,P16152,P11413,Q8N183,Q96DG6,P42765,Q96G03,P49773,P62633,P17812,P62879,Q9Y285,Q04828,P42330,Q06210,Q99829,P14174
1	13	1	GO:0018904	BP	ether metabolic process	5	P10599
1	12	1	GO:0006662	BP	glycerol ether metabolic process	6	P10599
9.18e-05	356	12	GO:0044282	BP	small molecule catabolic process	5	P49748,Q9NQ88,P40939,Q16698,Q14376,P26440,P51659,P13804,O14732,P00367,Q96G03,P42330
0.000228	553	14	GO:0044283	BP	small molecule biosynthetic process	5	P49748,P15121,Q96PU8,P47712,P51659,O14732,P60891,P00367,P16152,P11413,P42765,P62633,P42330,P14174
1	175	3	GO:0006766	BP	vitamin metabolic process	5	P16152,Q04828,P42330
1	78	3	GO:0006775	BP	fat-soluble vitamin metabolic process	6	P16152,Q04828,P42330
0.0162	393	10	GO:0006066	BP	alcohol metabolic process	5	P49748,P15121,Q00341,P47712,O14732,P07108,P11413,P42765,P62633,P42330
1	46	1	GO:0034308	BP	primary alcohol metabolic process	6	P42330
0.542	128	5	GO:1902652	BP	secondary alcohol metabolic process	6	P49748,Q00341,P11413,P42765,P62633
1	107	2	GO:0019751	BP	polyol metabolic process	6	P15121,O14732
0.00988	153	7	GO:0046165	BP	alcohol biosynthetic process	6	P15121,P47712,O14732,P11413,P42765,P62633,P42330
1	39	2	GO:0046173	BP	polyol biosynthetic process	7	P15121,O14732
1	50	3	GO:1902653	BP	secondary alcohol biosynthetic process	7	P11413,P42765,P62633
1	56	2	GO:0046164	BP	alcohol catabolic process	6	O14732,P42330
1	18	1	GO:0046174	BP	polyol catabolic process	7	O14732
1	9	1	GO:0034310	BP	primary alcohol catabolic process	7	P42330
0.995	317	7	GO:0005996	BP	monosaccharide metabolic process	5	Q9NQ88,P15121,Q04446,Q14376,P11413,Q96G03,Q06210
1	13	1	GO:0019321	BP	pentose metabolic process	6	P11413
1	95	2	GO:0046364	BP	monosaccharide biosynthetic process	6	P15121,P11413
1	4	1	GO:0019322	BP	pentose biosynthetic process	7	P11413
1	61	3	GO:0046365	BP	monosaccharide catabolic process	6	Q9NQ88,Q14376,Q96G03
0.375	270	7	GO:0019318	BP	hexose metabolic process	6	Q9NQ88,P15121,Q04446,Q14376,P11413,Q96G03,Q06210
1	51	3	GO:0019320	BP	hexose catabolic process	7	Q9NQ88,Q14376,Q96G03
1	13	2	GO:0006012	BP	galactose metabolic process	7	Q14376,Q96G03
0.713	6	2	GO:0019388	BP	galactose catabolic process	8	Q14376,Q96G03
1	232	5	GO:0006006	BP	glucose metabolic process	7	Q9NQ88,Q04446,P11413,Q96G03,Q06210
1	34	1	GO:0006007	BP	glucose catabolic process	8	Q9NQ88
1	13	1	GO:0006000	BP	fructose metabolic process	7	P15121
1	88	1	GO:0019319	BP	hexose biosynthetic process	7	P15121
1	2	1	GO:0046370	BP	fructose biosynthetic process	8	P15121
1.89e-08	1111	25	GO:0055114	BP	oxidation-reduction process	4	O43488,P49748,Q9NQ88,P40939,P15121,O00625,P30043,Q16698,O76003,Q04446,P26440,P51659,P10599,P13804,P22695,P00367,P16152,P11413,Q8N183,Q96G03,P62879,P41236,Q04828,P42330,Q06210
1	146	1	GO:0044236	BP	multicellular organismal metabolic process	4	P42330
1	130	1	GO:0044259	BP	multicellular organismal macromolecule metabolic process	5	P42330
1.35e-06	1363	25	GO:0006629	BP	lipid metabolic process	4	P60953,P49748,P40939,P15121,Q05639,Q16698,O60869,Q96PU8,Q00341,P47712,P26440,P51659,P13804,O14732,O00622,P07108,P16152,P11413,P42765,P62633,Q04828,P42330,Q06210,Q99829,P14174
0.0119	297	9	GO:0008202	BP	steroid metabolic process	5	P49748,P15121,Q00341,P51659,P11413,P42765,P62633,Q04828,P42330
0.795	139	5	GO:0016125	BP	sterol metabolic process	6	P49748,Q00341,P11413,P42765,P62633
0.485	125	5	GO:0008203	BP	cholesterol metabolic process	7	P49748,Q00341,P11413,P42765,P62633
0.00187	659	14	GO:0008610	BP	lipid biosynthetic process	5	P49748,P40939,P15121,Q96PU8,P47712,P51659,O00622,P16152,P11413,P42765,P62633,P42330,Q99829,P14174
0.133	156	6	GO:0006694	BP	steroid biosynthetic process	6	P15121,P51659,P11413,P42765,P62633,P42330
1	55	3	GO:0016126	BP	sterol biosynthetic process	7	P11413,P42765,P62633
1	50	3	GO:0006695	BP	cholesterol biosynthetic process	8	P11413,P42765,P62633
0.0995	299	8	GO:0016042	BP	lipid catabolic process	5	P49748,P40939,Q16698,P47712,P26440,P51659,P13804,P42330
1	367	7	GO:0032259	BP	methylation	3	Q6FI81,Q7KZ85,Q7Z2T5,Q92541,Q8WXI9,Q5VTR2,P62805
1.14e-64	6922	141	GO:0006807	BP	nitrogen compound metabolic process	3	P23511,Q9Y3F4,P30876,O43488,P16989,P67809,Q15717,P60953,Q15645,Q96EP5,P12814,Q00325,Q12789,Q9NQT4,Q9NQ88,Q96FV9,P15121,Q8IWX8,O00625,P35637,P30043,P49588,P45973,P31942,P52272,Q96RN5,O00541,Q13243,Q86U42,Q9H307,O94906,Q05639,O00567,O75832,O60828,Q13887,P56270,P29692,P06732,P36954,Q04837,P04792,P41223,O60869,O00151,Q9UQE7,P07737,Q7KZ85,P26196,Q14839,Q96PU8,Q13895,Q04637,P24534,P23246,P19623,P47712,…
0.0308	182	7	GO:0097164	BP	ammonium ion metabolic process	4	O43488,P15121,P19623,P47712,P07108,Q04828,P42330
2.98e-18	2290	49	GO:1901564	BP	organonitrogen compound metabolic process	4	P16989,Q15717,Q00325,Q9NQ88,P15121,P30043,P49588,Q05639,O75832,P29692,P06732,P04792,P26196,Q96PU8,Q04637,P24534,P19623,P47712,Q07666,P22626,P26440,Q96I15,P62826,P63241,Q9BQ69,Q9NTK5,Q14103,P23381,P22695,O00622,Q9BY44,P60891,P21281,P00367,Q92879,P07108,P68104,P32320,P11413,P60842,P13639,Q96G03,P49773,P17812,P47813,Q9Y285,Q06210,Q9ULC4,P26641
5.28e-13	1439	34	GO:1901566	BP	organonitrogen compound biosynthetic process	5	P16989,Q15717,Q00325,P49588,Q05639,P29692,P06732,P04792,P26196,Q96PU8,Q04637,P24534,P19623,P47712,Q07666,P22626,P62826,P63241,Q14103,P23381,O00622,Q9BY44,P60891,P00367,Q92879,P68104,P32320,P60842,P13639,P17812,P47813,Q9Y285,Q9ULC4,P26641
1	362	6	GO:1901565	BP	organonitrogen compound catabolic process	5	Q9NQ88,P30043,P26440,P00367,P32320,P49773
1	239	5	GO:0009308	BP	amine metabolic process	5	O75832,P06732,P19623,P47712,P07108
2.17e-87	10390	186	GO:0044237	BP	cellular metabolic process	3	P23511,Q9Y3F4,P30876,O43488,P16989,P67809,Q15717,O60884,P60953,Q15645,Q96EP5,P12814,P49748,Q00325,P60709,Q12789,Q9NQT4,Q13409,Q9NQ88,Q96FV9,P40939,P15121,Q14247,Q8IWX8,O00625,P30040,P35637,P30043,P49588,P45973,P31942,P52272,Q9Y5L4,Q96RN5,P30046,O00541,P35579,Q00688,Q13243,Q86U42,Q9H307,O94906,Q05639,O00567,O75832,O60828,Q13887,P56270,Q16698,P29692,P04350,P06732,O14737,P36954,Q04837,P04792,P41223,…
7.84e-09	3149	43	GO:0006793	BP	phosphorus metabolic process	4	Q9Y3F4,P60953,Q9NQ88,P40939,P30040,Q05639,O75832,P06732,P04792,P47712,P18846,P33552,P51659,Q9UJU6,P10599,P30154,Q9NTK5,P22695,O14732,O00622,Q9BY44,P60891,P21281,Q8N726,P07108,P32320,P11413,Q13418,P46108,Q9NYV4,Q96KB5,Q96G03,P49773,P06493,P17812,P31947,P07355,P41236,Q9UNN5,O94992,Q06210,Q99829,P14174
1.66e-08	3088	42	GO:0006796	BP	phosphate-containing compound metabolic process	5	Q9Y3F4,P60953,Q9NQ88,P40939,P30040,Q05639,O75832,P06732,P04792,P47712,P18846,P33552,Q9UJU6,P10599,P30154,Q9NTK5,P22695,O14732,O00622,Q9BY44,P60891,P21281,Q8N726,P07108,P32320,P11413,Q13418,P46108,Q9NYV4,Q96KB5,Q96G03,P49773,P06493,P17812,P31947,P07355,P41236,Q9UNN5,O94992,Q06210,Q99829,P14174
0.000354	2213	28	GO:0016310	BP	phosphorylation	6	Q9Y3F4,P60953,Q9NQ88,P30040,Q05639,O75832,P06732,P04792,P18846,P33552,Q9UJU6,P10599,P22695,O14732,O00622,Q9BY44,P60891,Q8N726,Q13418,P46108,Q9NYV4,Q96KB5,P06493,P31947,P07355,Q9UNN5,O94992,P14174
1	434	4	GO:0016311	BP	dephosphorylation	6	Q9NQ88,P30154,O14732,P41236
0.00165	1081	18	GO:0019637	BP	organophosphate metabolic process	5	P60953,Q9NQ88,P40939,P06732,P47712,Q9NTK5,P22695,O14732,P60891,P21281,P07108,P32320,P11413,Q96G03,P49773,P17812,Q06210,Q99829
1	595	7	GO:0090407	BP	organophosphate biosynthetic process	6	P40939,P06732,P47712,P60891,P11413,P17812,Q99829
1	32	1	GO:0019692	BP	deoxyribose phosphate metabolic process	6	Q96G03
1	36	1	GO:0052646	BP	alditol phosphate metabolic process	6	P47712
1	8	1	GO:0006002	BP	fructose 6-phosphate metabolic process	6	Q06210
1	534	9	GO:0019693	BP	ribose phosphate metabolic process	6	Q9NQ88,Q9NTK5,P22695,P60891,P21281,P11413,Q96G03,P49773,P17812
1	4	1	GO:0046391	BP	5-phosphoribose 1-diphosphate metabolic process	7	P60891
1	267	3	GO:0046390	BP	ribose phosphate biosynthetic process	7	P60891,P11413,P17812
1	4	1	GO:0006015	BP	5-phosphoribose 1-diphosphate biosynthetic process	8	P60891
0.525	27	3	GO:0051156	BP	glucose 6-phosphate metabolic process	6	Q9NQ88,P11413,Q96G03
1	156	5	GO:0046434	BP	organophosphate catabolic process	6	Q9NQ88,P47712,O14732,Q96G03,P49773
1	21	1	GO:0046386	BP	deoxyribose phosphate catabolic process	7	Q96G03
1	6	1	GO:0030388	BP	fructose 1,6-bisphosphate metabolic process	6	Q9NQ88
1	6	1	GO:0006003	BP	fructose 2,6-bisphosphate metabolic process	6	Q9NQ88
1	68	1	GO:0043647	BP	inositol phosphate metabolic process	6	O14732
1	11	1	GO:0071545	BP	inositol phosphate catabolic process	7	O14732
2.07e-11	1736	35	GO:0044248	BP	cellular catabolic process	4	P49748,Q9NQT4,Q9NQ88,P40939,Q14247,P30043,Q05639,O75832,Q16698,P26196,Q04637,P47712,Q9GZT3,P26440,P51659,Q14103,P13804,Q8N726,P00367,Q5VTR2,P68104,P32320,Q01081,Q9NRR5,P60842,Q08379,Q96KB5,Q96G03,P49773,P06493,Q01780,P07355,Q9UNN5,P42330,Q15366
2.76e-65	8596	154	GO:0044260	BP	cellular macromolecule metabolic process	4	P23511,Q9Y3F4,P30876,P16989,P67809,Q15717,P60953,Q15645,Q96EP5,P12814,P49748,Q00325,P60709,Q12789,Q9NQT4,Q13409,Q9NQ88,Q96FV9,Q8IWX8,O00625,P30040,P35637,P49588,P45973,P31942,P52272,Q9Y5L4,Q96RN5,O00541,P35579,Q00688,Q13243,Q86U42,Q9H307,O94906,Q05639,O00567,O75832,O60828,Q13887,P56270,P29692,P04350,O14737,P36954,Q04837,P04792,P41223,O60869,O00151,Q9UQE7,P07737,Q7KZ85,P26196,Q14839,Q96PU8,Q13895,…
1	280	6	GO:0043414	BP	macromolecule methylation	5	Q7KZ85,Q7Z2T5,Q92541,Q8WXI9,Q5VTR2,P62805
1	151	1	GO:0043112	BP	receptor metabolic process	5	P07355
1	14	1	GO:0032799	BP	low-density lipoprotein receptor particle metabolic process	6	P07355
1	24	1	GO:0032801	BP	receptor catabolic process	6	P07355
1	82	1	GO:0031623	BP	receptor internalization	6	P07355
1.59e-25	5157	83	GO:0044267	BP	cellular protein metabolic process	5	Q9Y3F4,P16989,Q15717,P60953,P49748,Q00325,P60709,Q13409,P30040,P49588,Q9Y5L4,P35579,Q00688,Q05639,O75832,P29692,P04350,O14737,P04792,Q9UQE7,Q7KZ85,P26196,Q96PU8,Q04637,P24534,P23246,Q9GZZ1,Q07666,P22626,P18846,P33552,Q9BW27,P62826,P63241,Q9BQ69,Q9UJU6,P30419,P10599,P30154,Q92541,Q14103,P23381,O00622,Q10471,Q9BY44,Q8N726,P06396,Q92879,Q92621,Q5VTR2,P68104,P11413,P04080,Q9NRR5,P60842,Q10713,Q13418,…
1	6	1	GO:0030091	BP	protein repair	6	P10599
2.8e-07	3959	46	GO:0006464	BP	cellular protein modification process	6	Q9Y3F4,P60953,Q13409,P30040,Q00688,O75832,P04792,Q9UQE7,Q7KZ85,P23246,Q9GZZ1,P18846,P33552,Q9BW27,P63241,Q9BQ69,Q9UJU6,P30419,P10599,P30154,Q92541,O00622,Q10471,Q9BY44,Q8N726,Q92621,Q5VTR2,P11413,Q13418,Q08379,P46108,Q9NYV4,P13639,Q96FW1,Q96KB5,P06493,P31947,P07355,P41236,Q9UNN5,O94992,P62937,P62805,Q06210,Q14203,P14174
1	160	3	GO:0008213	BP	protein alkylation	7	Q7KZ85,Q92541,Q5VTR2
1	160	3	GO:0006479	BP	protein methylation	8	Q7KZ85,Q92541,Q5VTR2
1	1023	9	GO:0070647	BP	protein modification by small protein conjugation or removal	7	P60953,O75832,Q9UQE7,Q9BW27,Q8N726,Q92621,Q5VTR2,Q96FW1,P06493
1	896	9	GO:0032446	BP	protein modification by small protein conjugation	8	P60953,O75832,Q9UQE7,Q9BW27,Q8N726,Q92621,Q5VTR2,Q96FW1,P06493
1	784	6	GO:0016567	BP	protein ubiquitination	9	P60953,O75832,Q8N726,Q5VTR2,Q96FW1,P06493
1	53	1	GO:0006513	BP	protein monoubiquitination	10	Q5VTR2
1	224	4	GO:0000209	BP	protein polyubiquitination	10	O75832,Q8N726,Q5VTR2,Q96FW1
1	45	2	GO:0070534	BP	protein K63-linked ubiquitination	11	Q8N726,Q96FW1
1	145	1	GO:0070646	BP	protein modification by small protein removal	8	Q96FW1
1	128	1	GO:0016579	BP	protein deubiquitination	9	Q96FW1
1	22	1	GO:0071108	BP	protein K48-linked deubiquitination	10	Q96FW1
1	217	2	GO:0043543	BP	protein acylation	7	Q9GZZ1,P30419
1	187	1	GO:0006473	BP	protein acetylation	8	Q9GZZ1
1	162	1	GO:0006475	BP	internal protein amino acid acetylation	9	Q9GZZ1
1	42	1	GO:0008214	BP	protein dealkylation	7	P62805
1	42	1	GO:0006482	BP	protein demethylation	8	P62805
1	1	1	GO:0010731	BP	protein glutathionylation	7	P11413
1	85	1	GO:0035601	BP	protein deacylation	7	P23246
1	80	1	GO:0006476	BP	protein deacetylation	8	P23246
0.000158	1367	22	GO:0018193	BP	peptidyl-amino acid modification	7	P60953,Q13409,Q00688,Q9UQE7,Q7KZ85,Q9GZZ1,Q9BW27,P63241,P30419,P10599,Q92541,Q10471,Q8N726,Q92621,Q13418,Q08379,P13639,P06493,P62937,Q06210,Q14203,P14174
1	338	1	GO:0018212	BP	peptidyl-tyrosine modification	8	P14174
1	2	1	GO:0018201	BP	peptidyl-glycine modification	8	P30419
1	11	1	GO:0018202	BP	peptidyl-histidine modification	8	P13639
1	8	1	GO:0017182	BP	peptidyl-diphthamide metabolic process	9	P13639
1	264	6	GO:0018209	BP	peptidyl-serine modification	8	P60953,P10599,Q10471,Q13418,P06493,P14174
1	83	2	GO:0018210	BP	peptidyl-threonine modification	8	Q10471,P06493
1	249	4	GO:0018196	BP	peptidyl-asparagine modification	8	Q13409,Q08379,Q06210,Q14203
0.713	398	8	GO:0018205	BP	peptidyl-lysine modification	8	Q9UQE7,Q7KZ85,Q9GZZ1,Q9BW27,P63241,Q92541,Q8N726,Q92621
1	127	4	GO:0016925	BP	protein sumoylation	9	Q9UQE7,Q9BW27,Q8N726,Q92621
1	161	1	GO:0018394	BP	peptidyl-lysine acetylation	9	Q9GZZ1
1	156	1	GO:0018393	BP	internal peptidyl-lysine acetylation	10	Q9GZZ1
1	109	2	GO:0018022	BP	peptidyl-lysine methylation	9	Q7KZ85,Q92541
1	31	1	GO:0018023	BP	peptidyl-lysine trimethylation	10	Q92541
1	4	1	GO:0008612	BP	peptidyl-lysine modification to peptidyl-hypusine	9	P63241
1	61	2	GO:0018208	BP	peptidyl-proline modification	8	Q00688,P62937
1	47	2	GO:0000413	BP	protein peptidyl-prolyl isomerization	9	Q00688,P62937
0.0143	478	11	GO:0043687	BP	post-translational protein modification	7	Q13409,Q9UQE7,Q9BW27,P63241,Q10471,Q8N726,Q92621,Q08379,P13639,Q06210,Q14203
1	28	2	GO:0031365	BP	N-terminal protein amino acid modification	7	Q9GZZ1,P30419
1	16	1	GO:0006474	BP	N-terminal protein amino acid acetylation	8	Q9GZZ1
1	4	1	GO:0051725	BP	protein de-ADP-ribosylation	7	Q9BQ69
1	335	2	GO:0006470	BP	protein dephosphorylation	7	P30154,P41236
0.0227	1849	22	GO:0006468	BP	protein phosphorylation	7	Q9Y3F4,P60953,P30040,O75832,P04792,P18846,P33552,Q9UJU6,P10599,O00622,Q9BY44,Q8N726,Q13418,P46108,Q9NYV4,Q96KB5,P06493,P31947,P07355,Q9UNN5,O94992,P14174
1	230	1	GO:0046777	BP	protein autophosphorylation	8	Q9NYV4
1	250	5	GO:0018105	BP	peptidyl-serine phosphorylation	8	P60953,P10599,Q13418,P06493,P14174
1	336	1	GO:0018108	BP	peptidyl-tyrosine phosphorylation	8	P14174
1	79	1	GO:0018107	BP	peptidyl-threonine phosphorylation	8	P06493
1	9	1	GO:0034982	BP	mitochondrial protein processing	6	Q10713
1	552	5	GO:0009100	BP	glycoprotein metabolic process	5	Q13409,Q10471,Q08379,Q06210,Q14203
0.00667	956	16	GO:0044265	BP	cellular macromolecule catabolic process	5	Q9NQT4,O75832,P26196,Q04637,Q9GZT3,Q14103,Q8N726,Q5VTR2,Q9NRR5,P60842,Q96KB5,P06493,Q01780,P07355,Q9UNN5,Q15366
1	598	9	GO:0043632	BP	modification-dependent macromolecule catabolic process	6	O75832,Q8N726,Q5VTR2,Q9NRR5,Q96KB5,P06493,Q01780,Q9UNN5,Q15366
1	681	9	GO:0044257	BP	cellular protein catabolic process	6	O75832,Q8N726,Q5VTR2,Q9NRR5,Q96KB5,P06493,P07355,Q9UNN5,Q15366
1	650	8	GO:0051603	BP	proteolysis involved in cellular protein catabolic process	7	O75832,Q8N726,Q5VTR2,Q9NRR5,Q96KB5,P06493,Q9UNN5,Q15366
1	409	6	GO:0010498	BP	proteasomal protein catabolic process	8	O75832,Q9NRR5,Q96KB5,P06493,Q9UNN5,Q15366
1	590	8	GO:0019941	BP	modification-dependent protein catabolic process	8	O75832,Q8N726,Q5VTR2,Q9NRR5,Q96KB5,P06493,Q9UNN5,Q15366
1	582	8	GO:0006511	BP	ubiquitin-dependent protein catabolic process	9	O75832,Q8N726,Q5VTR2,Q9NRR5,Q96KB5,P06493,Q9UNN5,Q15366
1	383	6	GO:0043161	BP	proteasome-mediated ubiquitin-dependent protein catabolic process	10	O75832,Q9NRR5,Q96KB5,P06493,Q9UNN5,Q15366
1	120	2	GO:0031145	BP	anaphase-promoting complex-dependent proteasomal ubiquitin-dependent protein catabolic process	11	O75832,P06493
1	200	3	GO:0042787	BP	protein ubiquitination involved in ubiquitin-dependent protein catabolic process	10	O75832,Q8N726,P06493
1	5	1	GO:0032802	BP	low-density lipoprotein particle receptor catabolic process	7	P07355
1	383	4	GO:0006790	BP	sulfur compound metabolic process	4	P51659,P10599,P11413,P26641
1	91	1	GO:0035383	BP	thioester metabolic process	5	P51659
1	8	1	GO:0000103	BP	sulfate assimilation	5	P10599
5.99e-53	5905	121	GO:0046483	BP	heterocycle metabolic process	4	P23511,Q9Y3F4,P30876,P16989,P67809,P60953,Q15645,Q96EP5,P12814,Q12789,Q9NQT4,Q9NQ88,Q96FV9,Q8IWX8,O00625,P35637,P30043,P49588,P45973,P31942,P52272,Q96RN5,O00541,Q13243,Q86U42,Q9H307,O94906,O00567,O75832,O60828,Q13887,P56270,P29692,P36954,Q04837,P41223,O60869,O00151,Q9UQE7,P07737,Q7KZ85,P26196,Q14839,Q96PU8,Q13895,Q04637,P23246,Q9GZT3,Q7Z2T5,Q07666,P22626,P18846,Q13247,Q9BW27,P55795,O43707,Q14498,…
0.000988	444	12	GO:0046700	BP	heterocycle catabolic process	5	Q9NQT4,Q9NQ88,P30043,P26196,Q04637,Q9GZT3,Q14103,Q8N726,P32320,P60842,P49773,Q01780
9.23e-55	5921	123	GO:0006725	BP	cellular aromatic compound metabolic process	4	P23511,Q9Y3F4,P30876,P16989,P67809,P60953,Q15645,Q96EP5,P12814,Q12789,Q9NQT4,Q9NQ88,Q96FV9,P15121,Q8IWX8,O00625,P35637,P30043,P49588,P45973,P31942,P52272,Q96RN5,P30046,O00541,Q13243,Q86U42,Q9H307,O94906,O00567,O75832,O60828,Q13887,P56270,P29692,P36954,Q04837,P41223,O60869,O00151,Q9UQE7,P07737,Q7KZ85,P26196,Q14839,Q96PU8,Q13895,Q04637,P23246,Q9GZT3,Q7Z2T5,Q07666,P22626,P18846,Q13247,Q9BW27,P55795,…
1	2	1	GO:0090420	BP	naphthalene-containing compound metabolic process	5	P15121
1	2	1	GO:0018931	BP	naphthalene metabolic process	6	P15121
1	61	1	GO:0033013	BP	tetrapyrrole metabolic process	5	P30043
0.00128	455	12	GO:0019439	BP	aromatic compound catabolic process	5	Q9NQT4,Q9NQ88,P30043,P26196,Q04637,Q9GZT3,Q14103,Q8N726,P32320,P60842,P49773,Q01780
1	99	2	GO:0018958	BP	phenol-containing compound metabolic process	5	P15121,P30046
1	52	1	GO:0009712	BP	catechol-containing compound metabolic process	6	P15121
1	52	1	GO:0006584	BP	catecholamine metabolic process	7	P15121
1	12	1	GO:0042415	BP	norepinephrine metabolic process	8	P15121
1	19	1	GO:0006582	BP	melanin metabolic process	6	P30046
1	248	4	GO:0072593	BP	reactive oxygen species metabolic process	4	Q9NQ88,O00622,Q8N183,P42330
0.00866	366	10	GO:0051186	BP	cofactor metabolic process	4	O43488,Q9NQ88,P15121,P30043,P51659,P16152,P11413,Q96G03,Q04828,P42330
1	306	4	GO:0006732	BP	coenzyme metabolic process	5	Q9NQ88,P51659,P11413,Q96G03
1	142	3	GO:0006733	BP	oxidoreduction coenzyme metabolic process	6	Q9NQ88,P11413,Q96G03
1	91	1	GO:0006637	BP	acyl-CoA metabolic process	6	P51659
1	52	1	GO:0035337	BP	fatty-acyl-CoA metabolic process	7	P51659
1	1	1	GO:0036111	BP	very long-chain fatty-acyl-CoA metabolic process	8	P51659
1	3	1	GO:0036112	BP	medium-chain fatty-acyl-CoA metabolic process	8	P51659
1	21	1	GO:0051187	BP	cofactor catabolic process	5	P30043
1	40	1	GO:0006778	BP	porphyrin-containing compound metabolic process	5	P30043
1	32	1	GO:0042168	BP	heme metabolic process	6	P30043
0.00284	491	12	GO:0006091	BP	generation of precursor metabolites and energy	4	P49748,Q00325,Q9NQ88,Q04446,Q14061,P13804,P22695,Q8N183,Q96G03,P62879,P41236,Q06210
0.0197	402	10	GO:0015980	BP	energy derivation by oxidation of organic compounds	5	P49748,Q9NQ88,Q04446,P13804,P22695,Q8N183,Q96G03,P62879,P41236,Q06210
1	5	1	GO:0006113	BP	fermentation	6	Q9NQ88
1	183	5	GO:0006112	BP	energy reserve metabolic process	6	Q04446,Q96G03,P62879,P41236,Q06210
1	213	3	GO:0045333	BP	cellular respiration	6	P13804,P22695,Q8N183
1	64	1	GO:0009060	BP	aerobic respiration	7	P22695
1	147	3	GO:0022900	BP	electron transport chain	5	P13804,P22695,Q8N183
1	145	3	GO:0022904	BP	respiratory electron transport chain	6	P13804,P22695,Q8N183
1	37	1	GO:0017144	BP	drug metabolic process	4	P16152
1	117	1	GO:0001887	BP	selenium compound metabolic process	4	Q96I15
4.62e-63	6616	137	GO:0034641	BP	cellular nitrogen compound metabolic process	4	P23511,Q9Y3F4,P30876,P16989,P67809,Q15717,P60953,Q15645,Q96EP5,P12814,Q00325,Q12789,Q9NQT4,Q9NQ88,Q96FV9,Q8IWX8,O00625,P35637,P30043,P49588,P45973,P31942,P52272,Q96RN5,O00541,Q13243,Q86U42,Q9H307,O94906,Q05639,O00567,O75832,O60828,Q13887,P56270,P29692,P06732,P36954,Q04837,P04792,P41223,O60869,O00151,Q9UQE7,P07737,Q7KZ85,P26196,Q14839,Q96PU8,Q13895,Q04637,P24534,P23246,P19623,P47712,Q9GZT3,Q7Z2T5,…
0.000988	444	12	GO:0044270	BP	cellular nitrogen compound catabolic process	5	Q9NQT4,Q9NQ88,P30043,P26196,Q04637,Q9GZT3,Q14103,Q8N726,P32320,P60842,P49773,Q01780
1	8	1	GO:0033015	BP	tetrapyrrole catabolic process	6	P30043
1	8	1	GO:0006787	BP	porphyrin-containing compound catabolic process	7	P30043
1	8	1	GO:0042167	BP	heme catabolic process	8	P30043
1	230	5	GO:0044106	BP	cellular amine metabolic process	5	O75832,P06732,P19623,P47712,P07108
1	197	5	GO:0006576	BP	cellular biogenic amine metabolic process	6	O75832,P06732,P19623,P47712,P07108
1	89	2	GO:0042439	BP	ethanolamine-containing compound metabolic process	7	P47712,P07108
1	85	3	GO:0006595	BP	polyamine metabolic process	7	O75832,P06732,P19623
1	6	1	GO:0008216	BP	spermidine metabolic process	8	P19623
1	79	3	GO:0072527	BP	pyrimidine-containing compound metabolic process	5	P60891,P32320,P17812
1	33	1	GO:0072529	BP	pyrimidine-containing compound catabolic process	6	P32320
1	136	3	GO:0072524	BP	pyridine-containing compound metabolic process	5	Q9NQ88,P11413,Q96G03
1	575	7	GO:0072521	BP	purine-containing compound metabolic process	5	Q9NQ88,Q9BQ69,Q9NTK5,P22695,P60891,P21281,P49773
1	56	2	GO:0072523	BP	purine-containing compound catabolic process	6	Q9NQ88,P49773
6.16e-13	1004	29	GO:0043603	BP	cellular amide metabolic process	5	P16989,Q15717,Q00325,Q9NQ88,P49588,Q05639,P29692,P04792,P26196,Q96PU8,Q04637,P24534,Q07666,P22626,P62826,P63241,Q14103,P23381,O00622,Q9BY44,Q92879,P68104,P11413,P60842,P13639,P47813,Q9Y285,Q9ULC4,P26641
4.58e-13	835	27	GO:0006518	BP	peptide metabolic process	6	P16989,Q15717,Q00325,P49588,Q05639,P29692,P04792,P26196,Q96PU8,Q04637,P24534,Q07666,P22626,P62826,P63241,Q14103,P23381,Q9BY44,Q92879,P68104,P11413,P60842,P13639,P47813,Q9Y285,Q9ULC4,P26641
1.82e-53	5722	120	GO:0006139	BP	nucleobase-containing compound metabolic process	5	P23511,Q9Y3F4,P30876,P16989,P67809,P60953,Q15645,Q96EP5,P12814,Q12789,Q9NQT4,Q9NQ88,Q96FV9,Q8IWX8,O00625,P35637,P49588,P45973,P31942,P52272,Q96RN5,O00541,Q13243,Q86U42,Q9H307,O94906,O00567,O75832,O60828,Q13887,P56270,P29692,P36954,Q04837,P41223,O60869,O00151,Q9UQE7,P07737,Q7KZ85,P26196,Q14839,Q96PU8,Q13895,Q04637,P23246,Q9GZT3,Q7Z2T5,Q07666,P22626,P18846,Q13247,Q9BW27,P55795,O43707,Q14498,P62826,…
9.57e-50	5125	111	GO:0090304	BP	nucleic acid metabolic process	6	P23511,Q9Y3F4,P30876,P16989,P67809,P60953,Q15645,Q96EP5,P12814,Q12789,Q9NQT4,Q9NQ88,Q96FV9,Q8IWX8,O00625,P35637,P49588,P45973,P31942,P52272,Q96RN5,O00541,Q13243,Q86U42,Q9H307,O94906,O00567,O75832,O60828,Q13887,P56270,P29692,P36954,Q04837,P41223,O60869,O00151,Q9UQE7,P07737,Q7KZ85,P26196,Q14839,Q96PU8,Q13895,Q04637,P23246,Q9GZT3,Q7Z2T5,Q07666,P22626,P18846,Q13247,Q9BW27,P55795,O43707,Q14498,P62826,…
1	258	3	GO:0090305	BP	nucleic acid phosphodiester bond hydrolysis	7	Q9NQT4,Q8N726,Q01780
8.53e-09	978	24	GO:0006259	BP	DNA metabolic process	7	P30876,P60953,Q15645,Q9NQT4,Q9NQ88,Q96FV9,P36954,Q04837,Q9UQE7,Q7KZ85,P23246,P18846,P62826,P09651,Q8WXI9,Q8N726,P31949,Q96FW1,P06493,O75531,P52292,P55209,P62937,P62805
1	298	6	GO:0006310	BP	DNA recombination	8	Q15645,Q96FV9,Q7KZ85,P23246,P52292,P62805
1	40	1	GO:0035825	BP	reciprocal DNA recombination	9	Q15645
1	54	2	GO:0016444	BP	somatic cell DNA recombination	9	Q96FV9,Q7KZ85
1	12	1	GO:0015074	BP	DNA integration	8	O75531
1	122	3	GO:0006304	BP	DNA modification	8	Q9NQT4,Q8WXI9,P62805
1	102	2	GO:0044728	BP	DNA methylation or demethylation	9	Q8WXI9,P62805
1	89	2	GO:0006305	BP	DNA alkylation	9	Q8WXI9,P62805
1	10	1	GO:0045006	BP	DNA deamination	9	Q9NQT4
0.173	519	10	GO:0006281	BP	DNA repair	8	P30876,Q15645,Q9NQ88,P36954,Q9UQE7,P23246,Q96FW1,P06493,P52292,P62805
1	74	1	GO:0000726	BP	non-recombinational repair	9	P62805
1	227	5	GO:0006302	BP	double-strand break repair	9	Q15645,P23246,Q96FW1,P52292,P62805
1	67	1	GO:0006303	BP	double-strand break repair via nonhomologous end joining	10	P62805
1	116	2	GO:0006289	BP	nucleotide-excision repair	9	P30876,P36954
1	73	2	GO:0006283	BP	transcription-coupled nucleotide-excision repair	10	P30876,P36954
1	155	2	GO:0000725	BP	recombinational repair	9	P23246,P62805
1	155	2	GO:0000724	BP	double-strand break repair via homologous recombination	10	P23246,P62805
1.36e-45	4606	102	GO:0016070	BP	RNA metabolic process	7	P23511,Q9Y3F4,P30876,P16989,P67809,Q15645,Q96EP5,P12814,Q12789,Q9NQT4,Q9NQ88,Q96FV9,Q8IWX8,O00625,P35637,P49588,P45973,P31942,P52272,Q96RN5,O00541,Q13243,Q86U42,Q9H307,O94906,O00567,O75832,O60828,Q13887,P56270,P29692,P36954,P41223,O60869,O00151,P07737,Q7KZ85,P26196,Q14839,Q96PU8,Q13895,Q04637,P23246,Q9GZT3,Q7Z2T5,Q07666,P22626,P18846,Q13247,Q9BW27,P55795,O43707,Q14498,P62826,P09651,Q13610,P62995,…
1	32	1	GO:0000959	BP	mitochondrial RNA metabolic process	8	Q9GZT3
2.15e-38	631	45	GO:0016071	BP	mRNA metabolic process	8	Q9Y3F4,P30876,P67809,Q96EP5,Q9NQT4,Q96FV9,P35637,P31942,P52272,Q13243,Q86U42,Q9H307,O94906,O60828,P36954,P41223,Q7KZ85,P26196,Q96PU8,Q04637,P23246,Q07666,P22626,Q13247,P55795,Q14498,P09651,P62995,Q14103,Q92879,O00422,Q5VTR2,Q01081,Q01130,P60842,Q9NYV4,Q9UQ35,P31943,P52597,P51991,Q01780,Q13151,O75400,Q15366,Q9UPN6
1	24	1	GO:0008334	BP	histone mRNA metabolic process	9	Q01780
5.45e-08	480	17	GO:0034660	BP	ncRNA metabolic process	8	P30876,Q12789,Q9NQT4,P49588,O00541,O00567,P36954,Q13895,Q7Z2T5,P22626,Q9BW27,P62826,P23381,Q8N726,Q92621,Q01780,Q9Y285
1	4	1	GO:0071043	BP	CUT metabolic process	9	Q01780
1	34	1	GO:0016073	BP	snRNA metabolic process	9	Q9NQT4
1	28	2	GO:0034587	BP	piRNA metabolic process	9	P30876,P36954
0.159	161	6	GO:0016072	BP	rRNA metabolic process	9	Q9NQT4,O00541,O00567,Q13895,Q8N726,Q01780
0.0624	203	7	GO:0006399	BP	tRNA metabolic process	9	P49588,Q7Z2T5,Q9BW27,P62826,P23381,Q92621,Q9Y285
1	9	1	GO:0016074	BP	snoRNA metabolic process	9	Q9NQT4
1	38	1	GO:0043631	BP	RNA polyadenylation	8	Q5VTR2
1	45	2	GO:0010501	BP	RNA secondary structure unwinding	8	P26196,P60842
1	113	2	GO:0090501	BP	RNA phosphodiester bond hydrolysis	8	Q9NQT4,Q01780
1	30	2	GO:0090503	BP	RNA phosphodiester bond hydrolysis, exonucleolytic	9	Q9NQT4,Q01780
1	126	3	GO:0009451	BP	RNA modification	8	P49588,O00567,Q7Z2T5
1	54	1	GO:0001510	BP	RNA methylation	9	Q7Z2T5
1.17e-43	821	53	GO:0006396	BP	RNA processing	8	Q9Y3F4,P30876,P67809,Q96EP5,Q9NQT4,Q96FV9,Q8IWX8,P35637,P49588,P31942,P52272,O00541,Q13243,Q86U42,Q9H307,O94906,O00567,O60828,P36954,P41223,Q7KZ85,Q96PU8,Q13895,P23246,Q7Z2T5,Q07666,P22626,Q13247,Q9BW27,P55795,Q14498,P62826,P09651,P62995,Q14103,Q8N726,Q92879,O00422,O14979,Q92621,Q5VTR2,Q01081,Q01130,Q9NYV4,Q9UQ35,P31943,P52597,P51991,Q01780,Q13151,O75400,Q15366,Q9UPN6
1	37	2	GO:0036260	BP	RNA capping	9	P30876,P36954
1	37	2	GO:0009452	BP	7-methylguanosine RNA capping	10	P30876,P36954
4.13e-05	331	12	GO:0034470	BP	ncRNA processing	9	Q9NQT4,P49588,O00541,O00567,Q13895,Q7Z2T5,P22626,Q9BW27,P62826,Q8N726,Q92621,Q01780
1	8	1	GO:0043144	BP	snoRNA processing	10	Q9NQT4
1	148	5	GO:0008033	BP	tRNA processing	10	P49588,Q7Z2T5,Q9BW27,P62826,Q92621
1	70	2	GO:0006400	BP	tRNA modification	11	P49588,Q7Z2T5
1	23	1	GO:0030488	BP	tRNA methylation	12	Q7Z2T5
1	22	1	GO:0016180	BP	snRNA processing	10	Q9NQT4
1	25	1	GO:0031050	BP	dsRNA fragmentation	9	P22626
2.27e-37	383	38	GO:0008380	BP	RNA splicing	9	Q9Y3F4,P30876,P67809,Q96EP5,Q96FV9,P35637,P31942,P52272,Q13243,Q86U42,Q9H307,O94906,O60828,P36954,P41223,Q7KZ85,Q96PU8,P23246,P22626,Q13247,P55795,Q14498,P09651,P62995,Q14103,Q92879,O00422,Q01081,Q01130,Q9NYV4,Q9UQ35,P31943,P52597,P51991,Q13151,O75400,Q15366,Q9UPN6
1.45e-32	289	32	GO:0000375	BP	RNA splicing, via transesterification reactions	10	Q9Y3F4,P30876,P67809,Q96EP5,P35637,P31942,P52272,Q13243,Q86U42,Q9H307,O94906,O60828,P36954,P41223,P23246,P22626,Q13247,P55795,P09651,P62995,Q14103,Q92879,O00422,Q01081,Q01130,Q9UQ35,P31943,P52597,P51991,Q13151,O75400,Q15366
9.16e-33	285	32	GO:0000377	BP	RNA splicing, via transesterification reactions with bulged adenosine as nucleophile	11	Q9Y3F4,P30876,P67809,Q96EP5,P35637,P31942,P52272,Q13243,Q86U42,Q9H307,O94906,O60828,P36954,P41223,P23246,P22626,Q13247,P55795,P09651,P62995,Q14103,Q92879,O00422,Q01081,Q01130,Q9UQ35,P31943,P52597,P51991,Q13151,O75400,Q15366
0.00101	109	7	GO:0031123	BP	RNA 3'-end processing	9	Q9NQT4,Q13243,Q86U42,Q13247,Q5VTR2,Q01081,Q01130
1	21	1	GO:0043628	BP	ncRNA 3'-end processing	10	Q9NQT4
1	10	1	GO:0034472	BP	snRNA 3'-end processing	11	Q9NQT4
1	8	1	GO:0034475	BP	U4 snRNA 3'-end processing	12	Q9NQT4
1	8	1	GO:0031126	BP	snoRNA 3'-end processing	11	Q9NQT4
1	5	1	GO:0071051	BP	polyadenylation-dependent snoRNA 3'-end processing	12	Q9NQT4
2.04e-37	454	40	GO:0006397	BP	mRNA processing	9	Q9Y3F4,P30876,P67809,Q96EP5,Q96FV9,P35637,P31942,P52272,Q13243,Q86U42,Q9H307,O94906,O60828,P36954,P41223,Q7KZ85,Q96PU8,P23246,Q07666,P22626,Q13247,P55795,Q14498,P09651,P62995,Q14103,Q92879,O00422,Q5VTR2,Q01081,Q01130,Q9NYV4,Q9UQ35,P31943,P52597,P51991,Q13151,O75400,Q15366,Q9UPN6
0.00355	83	6	GO:0031124	BP	mRNA 3'-end processing	10	Q13243,Q86U42,Q13247,Q5VTR2,Q01081,Q01130
1	37	1	GO:0006378	BP	mRNA polyadenylation	11	Q5VTR2
1	33	2	GO:0006370	BP	7-methylguanosine mRNA capping	10	P30876,P36954
9.16e-33	285	32	GO:0000398	BP	mRNA splicing, via spliceosome	10	Q9Y3F4,P30876,P67809,Q96EP5,P35637,P31942,P52272,Q13243,Q86U42,Q9H307,O94906,O60828,P36954,P41223,P23246,P22626,Q13247,P55795,P09651,P62995,Q14103,Q92879,O00422,Q01081,Q01130,Q9UQ35,P31943,P52597,P51991,Q13151,O75400,Q15366
1.61e-08	41	8	GO:0000380	BP	alternative mRNA splicing, via spliceosome	11	P52272,O60828,P23246,Q13247,P09651,P62995,O00422,Q01130
0.00247	398	11	GO:0034655	BP	nucleobase-containing compound catabolic process	6	Q9NQT4,Q9NQ88,P26196,Q04637,Q9GZT3,Q14103,Q8N726,P32320,P60842,P49773,Q01780
1	32	1	GO:0006308	BP	DNA catabolic process	7	Q8N726
1	23	1	GO:0000737	BP	DNA catabolic process, endonucleolytic	8	Q8N726
0.185	241	7	GO:0006401	BP	RNA catabolic process	7	Q9NQT4,P26196,Q04637,Q9GZT3,Q14103,P60842,Q01780
1	7	1	GO:0043633	BP	polyadenylation-dependent RNA catabolic process	8	Q01780
1	24	2	GO:0034661	BP	ncRNA catabolic process	8	Q9NQT4,Q01780
1	6	1	GO:0043634	BP	polyadenylation-dependent ncRNA catabolic process	9	Q01780
1	17	2	GO:0016075	BP	rRNA catabolic process	9	Q9NQT4,Q01780
1	4	1	GO:0071034	BP	CUT catabolic process	9	Q01780
1	15	2	GO:0071025	BP	RNA surveillance	8	Q9NQT4,Q01780
1	13	2	GO:0071027	BP	nuclear RNA surveillance	9	Q9NQT4,Q01780
1	6	1	GO:0071029	BP	nuclear ncRNA surveillance	10	Q01780
1	6	1	GO:0071046	BP	nuclear polyadenylation-dependent ncRNA catabolic process	11	Q01780
1	6	1	GO:0071035	BP	nuclear polyadenylation-dependent rRNA catabolic process	12	Q01780
1	212	5	GO:0006402	BP	mRNA catabolic process	8	Q9NQT4,P26196,Q04637,P60842,Q01780
1	196	5	GO:0000956	BP	nuclear-transcribed mRNA catabolic process	9	Q9NQT4,P26196,Q04637,P60842,Q01780
0.484	67	4	GO:0000288	BP	nuclear-transcribed mRNA catabolic process, deadenylation-dependent decay	10	Q9NQT4,P26196,Q04637,P60842
1	32	2	GO:0000291	BP	nuclear-transcribed mRNA catabolic process, exonucleolytic	10	Q9NQT4,P26196
1	9	1	GO:0034427	BP	nuclear-transcribed mRNA catabolic process, exonucleolytic, 3'-5'	11	Q9NQT4
1	30	2	GO:0043928	BP	exonucleolytic nuclear-transcribed mRNA catabolic process involved in deadenylation-dependent decay	11	Q9NQT4,P26196
1	123	2	GO:0000184	BP	nuclear-transcribed mRNA catabolic process, nonsense-mediated decay	10	Q04637,Q01780
1	10	1	GO:0071044	BP	histone mRNA catabolic process	10	Q01780
1	32	2	GO:0000289	BP	nuclear-transcribed mRNA poly(A) tail shortening	10	Q04637,P60842
1	13	2	GO:0071028	BP	nuclear mRNA surveillance	10	Q9NQT4,Q01780
1	3	1	GO:0071030	BP	nuclear mRNA surveillance of spliceosomal pre-mRNA splicing	11	Q01780
1	5	1	GO:0071033	BP	nuclear retention of pre-mRNA at the site of transcription	11	Q01780
1	3	1	GO:0071048	BP	nuclear retention of unspliced pre-mRNA at the site of transcription	12	Q01780
1	4	1	GO:0000957	BP	mitochondrial RNA catabolic process	8	Q9GZT3
1	32	1	GO:0009225	BP	nucleotide-sugar metabolic process	6	Q06210
1	11	1	GO:0006047	BP	UDP-N-acetylglucosamine metabolic process	7	Q06210
0.122	715	12	GO:0055086	BP	nucleobase-containing small molecule metabolic process	6	Q9NQ88,Q9BQ69,P10599,Q9NTK5,P22695,P60891,P21281,P32320,P11413,Q96G03,P49773,P17812
1	71	2	GO:0009112	BP	nucleobase metabolic process	7	P60891,P32320
1	42	1	GO:0006144	BP	purine nucleobase metabolic process	8	P60891
1	4	1	GO:0046100	BP	hypoxanthine metabolic process	9	P60891
1	34	1	GO:0006206	BP	pyrimidine nucleobase metabolic process	8	P32320
1	3	1	GO:0019858	BP	cytosine metabolic process	9	P32320
1	655	10	GO:0006753	BP	nucleoside phosphate metabolic process	7	Q9NQ88,Q9NTK5,P22695,P60891,P21281,P32320,P11413,Q96G03,P49773,P17812
1	268	5	GO:0009141	BP	nucleoside triphosphate metabolic process	8	Q9NQ88,Q9NTK5,P22695,P21281,P17812
1	247	5	GO:0009199	BP	ribonucleoside triphosphate metabolic process	9	Q9NQ88,Q9NTK5,P22695,P21281,P17812
1	23	1	GO:0009147	BP	pyrimidine nucleoside triphosphate metabolic process	9	P17812
1	18	1	GO:0009208	BP	pyrimidine ribonucleoside triphosphate metabolic process	10	P17812
1	248	4	GO:0009144	BP	purine nucleoside triphosphate metabolic process	9	Q9NQ88,Q9NTK5,P22695,P21281
1	241	4	GO:0009205	BP	purine ribonucleoside triphosphate metabolic process	10	Q9NQ88,Q9NTK5,P22695,P21281
1	286	5	GO:0009123	BP	nucleoside monophosphate metabolic process	8	Q9NQ88,Q9NTK5,P22695,P60891,P21281
1	274	5	GO:0009161	BP	ribonucleoside monophosphate metabolic process	9	Q9NQ88,Q9NTK5,P22695,P60891,P21281
1	263	5	GO:0009126	BP	purine nucleoside monophosphate metabolic process	9	Q9NQ88,Q9NTK5,P22695,P60891,P21281
1	262	5	GO:0009167	BP	purine ribonucleoside monophosphate metabolic process	10	Q9NQ88,Q9NTK5,P22695,P60891,P21281
1	106	2	GO:1901292	BP	nucleoside phosphate catabolic process	8	Q9NQ88,P49773
1	648	10	GO:0009117	BP	nucleotide metabolic process	8	Q9NQ88,Q9NTK5,P22695,P60891,P21281,P32320,P11413,Q96G03,P49773,P17812
1	129	3	GO:0019362	BP	pyridine nucleotide metabolic process	9	Q9NQ88,P11413,Q96G03
1	129	3	GO:0046496	BP	nicotinamide nucleotide metabolic process	10	Q9NQ88,P11413,Q96G03
1	62	1	GO:0019674	BP	NAD metabolic process	11	Q9NQ88
1	40	1	GO:0006734	BP	NADH metabolic process	12	Q9NQ88
1	36	3	GO:0006739	BP	NADP metabolic process	11	Q9NQ88,P11413,Q96G03
1	3	1	GO:0006740	BP	NADPH regeneration	12	P11413
1	95	1	GO:0046939	BP	nucleotide phosphorylation	9	Q9NQ88
1	47	2	GO:0006220	BP	pyrimidine nucleotide metabolic process	9	P60891,P17812
1	520	7	GO:0009259	BP	ribonucleotide metabolic process	9	Q9NQ88,Q9NTK5,P22695,P60891,P21281,P49773,P17812
1	26	1	GO:0009218	BP	pyrimidine ribonucleotide metabolic process	10	P17812
1	526	6	GO:0006163	BP	purine nucleotide metabolic process	9	Q9NQ88,Q9NTK5,P22695,P60891,P21281,P49773
1	505	6	GO:0009150	BP	purine ribonucleotide metabolic process	10	Q9NQ88,Q9NTK5,P22695,P60891,P21281,P49773
1	99	2	GO:0009166	BP	nucleotide catabolic process	9	Q9NQ88,P49773
1	31	1	GO:0009261	BP	ribonucleotide catabolic process	10	P49773
1	49	2	GO:0006195	BP	purine nucleotide catabolic process	10	Q9NQ88,P49773
1	30	1	GO:0009154	BP	purine ribonucleotide catabolic process	11	P49773
1	117	1	GO:0009132	BP	nucleoside diphosphate metabolic process	8	Q9NQ88
1	94	1	GO:0009135	BP	purine nucleoside diphosphate metabolic process	9	Q9NQ88
1	96	1	GO:0009185	BP	ribonucleoside diphosphate metabolic process	9	Q9NQ88
1	94	1	GO:0009179	BP	purine ribonucleoside diphosphate metabolic process	10	Q9NQ88
1	89	1	GO:0006165	BP	nucleoside diphosphate phosphorylation	9	Q9NQ88
1	26	2	GO:0015949	BP	nucleobase-containing small molecule interconversion	7	P10599,P17812
0.622	390	8	GO:0009116	BP	nucleoside metabolic process	7	Q9NQ88,Q9BQ69,Q9NTK5,P22695,P60891,P21281,P32320,P17812
1	366	7	GO:0009119	BP	ribonucleoside metabolic process	8	Q9NQ88,Q9NTK5,P22695,P60891,P21281,P32320,P17812
1	35	1	GO:0009164	BP	nucleoside catabolic process	8	P32320
1	24	1	GO:0042454	BP	ribonucleoside catabolic process	9	P32320
1	53	2	GO:0006213	BP	pyrimidine nucleoside metabolic process	8	P32320,P17812
1	34	2	GO:0046131	BP	pyrimidine ribonucleoside metabolic process	9	P32320,P17812
1	9	1	GO:0046087	BP	cytidine metabolic process	10	P32320
1	16	1	GO:0046036	BP	CTP metabolic process	10	P17812
1	22	1	GO:0046135	BP	pyrimidine nucleoside catabolic process	9	P32320
1	11	1	GO:0046133	BP	pyrimidine ribonucleoside catabolic process	10	P32320
1	9	1	GO:0006216	BP	cytidine catabolic process	11	P32320
1	9	1	GO:0009972	BP	cytidine deamination	12	P32320
1	340	6	GO:0042278	BP	purine nucleoside metabolic process	8	Q9NQ88,Q9BQ69,Q9NTK5,P22695,P60891,P21281
1	337	5	GO:0046128	BP	purine ribonucleoside metabolic process	9	Q9NQ88,Q9NTK5,P22695,P60891,P21281
1	15	1	GO:0046033	BP	AMP metabolic process	10	P60891
1	79	1	GO:0046031	BP	ADP metabolic process	10	Q9NQ88
1	225	4	GO:0046034	BP	ATP metabolic process	10	Q9NQ88,Q9NTK5,P22695,P21281
1	98	1	GO:0006119	BP	oxidative phosphorylation	11	P22695
1	76	1	GO:0042773	BP	ATP synthesis coupled electron transport	12	P22695
1	75	1	GO:0042775	BP	mitochondrial ATP synthesis coupled electron transport	13	P22695
1	11	1	GO:0006122	BP	mitochondrial electron transport, ubiquinol to cytochrome c	14	P22695
1	71	1	GO:0006757	BP	ATP generation from ADP	11	Q9NQ88
1.22e-49	6210	120	GO:0044249	BP	cellular biosynthetic process	4	P23511,Q9Y3F4,P30876,P16989,P67809,Q15717,P60953,Q15645,P12814,P49748,Q00325,Q12789,Q13409,Q9NQ88,Q96FV9,P40939,P15121,O00625,P35637,P49588,P45973,Q96RN5,P30046,Q13243,Q86U42,Q9H307,O94906,Q05639,O75832,O60828,Q13887,P56270,P29692,P36954,Q04837,P04792,P41223,O60869,O00151,Q9UQE7,P07737,Q7KZ85,P26196,Q14839,Q96PU8,Q04446,Q04637,P24534,P23246,P19623,P47712,Q9GZT3,Q07666,P22626,P18846,Q13247,Q9BW27,…
1	36	1	GO:0043094	BP	cellular metabolic compound salvage	5	P32320
1.87e-26	4381	78	GO:0019438	BP	aromatic compound biosynthetic process	5	P23511,Q9Y3F4,P30876,P16989,P67809,Q15645,P12814,Q12789,Q9NQ88,Q96FV9,O00625,P35637,P45973,Q96RN5,P30046,Q13243,Q86U42,Q9H307,O94906,O75832,O60828,Q13887,P56270,P29692,P36954,P41223,O60869,O00151,P07737,Q7KZ85,Q14839,P23246,Q9GZT3,Q07666,P22626,P18846,Q13247,Q9BW27,O43707,Q14498,P62826,Q13610,P10599,Q92541,Q14103,O00622,Q8WXI9,Q9BY44,P60891,Q8N726,O00422,O14979,Q9Y2V2,Q92621,Q5VTR2,P68104,P32320,…
1	40	1	GO:0046189	BP	phenol-containing compound biosynthetic process	6	P30046
1	18	1	GO:0042438	BP	melanin biosynthetic process	7	P30046
1.18e-36	4934	95	GO:0044271	BP	cellular nitrogen compound biosynthetic process	5	P23511,Q9Y3F4,P30876,P16989,P67809,Q15717,Q15645,P12814,Q00325,Q12789,Q9NQ88,Q96FV9,O00625,P35637,P49588,P45973,Q96RN5,Q13243,Q86U42,Q9H307,O94906,Q05639,O75832,O60828,Q13887,P56270,P29692,P36954,P04792,P41223,O60869,O00151,P07737,Q7KZ85,P26196,Q14839,Q96PU8,Q04637,P24534,P23246,P19623,Q9GZT3,Q07666,P22626,P18846,Q13247,Q9BW27,O43707,Q14498,P62826,P63241,Q13610,P10599,Q92541,Q14103,P23381,O00622,…
9.72e-14	784	27	GO:0043604	BP	amide biosynthetic process	6	P16989,Q15717,Q00325,P49588,Q05639,P29692,P04792,P26196,Q96PU8,Q04637,P24534,Q07666,P22626,P62826,P63241,Q14103,P23381,O00622,Q9BY44,Q92879,P68104,P60842,P13639,P47813,Q9Y285,Q9ULC4,P26641
7.78e-14	706	26	GO:0043043	BP	peptide biosynthetic process	7	P16989,Q15717,Q00325,P49588,Q05639,P29692,P04792,P26196,Q96PU8,Q04637,P24534,Q07666,P22626,P62826,P63241,Q14103,P23381,Q9BY44,Q92879,P68104,P60842,P13639,P47813,Q9Y285,Q9ULC4,P26641
1	21	1	GO:0009309	BP	amine biosynthetic process	6	P19623
1	20	1	GO:0042401	BP	cellular biogenic amine biosynthetic process	7	P19623
1	13	1	GO:0006596	BP	polyamine biosynthetic process	8	P19623
1	4	1	GO:0008295	BP	spermidine biosynthetic process	9	P19623
1.08e-25	4378	77	GO:0018130	BP	heterocycle biosynthetic process	5	P23511,Q9Y3F4,P30876,P16989,P67809,Q15645,P12814,Q12789,Q9NQ88,Q96FV9,O00625,P35637,P45973,Q96RN5,Q13243,Q86U42,Q9H307,O94906,O75832,O60828,Q13887,P56270,P29692,P36954,P41223,O60869,O00151,P07737,Q7KZ85,Q14839,P23246,Q9GZT3,Q07666,P22626,P18846,Q13247,Q9BW27,O43707,Q14498,P62826,Q13610,P10599,Q92541,Q14103,O00622,Q8WXI9,Q9BY44,P60891,Q8N726,O00422,O14979,Q9Y2V2,Q92621,Q5VTR2,P68104,P32320,Q01081,…
1	16	1	GO:0046112	BP	nucleobase biosynthetic process	6	P60891
3.92e-26	4310	77	GO:0034654	BP	nucleobase-containing compound biosynthetic process	6	P23511,Q9Y3F4,P30876,P16989,P67809,Q15645,P12814,Q12789,Q9NQ88,Q96FV9,O00625,P35637,P45973,Q96RN5,Q13243,Q86U42,Q9H307,O94906,O75832,O60828,Q13887,P56270,P29692,P36954,P41223,O60869,O00151,P07737,Q7KZ85,Q14839,P23246,Q9GZT3,Q07666,P22626,P18846,Q13247,Q9BW27,O43707,Q14498,P62826,Q13610,P10599,Q92541,Q14103,O00622,Q8WXI9,Q9BY44,P60891,Q8N726,O00422,O14979,Q9Y2V2,Q92621,Q5VTR2,P68104,P32320,Q01081,…
1	17	1	GO:0009226	BP	nucleotide-sugar biosynthetic process	7	Q06210
1	6	1	GO:0006048	BP	UDP-N-acetylglucosamine biosynthetic process	8	Q06210
1	128	3	GO:0009163	BP	nucleoside biosynthetic process	7	P60891,P32320,P17812
1	16	1	GO:0043174	BP	nucleoside salvage	8	P32320
1	118	2	GO:0042455	BP	ribonucleoside biosynthetic process	8	P60891,P17812
1	318	2	GO:1901293	BP	nucleoside phosphate biosynthetic process	7	P60891,P17812
1	91	1	GO:0009124	BP	nucleoside monophosphate biosynthetic process	8	P60891
1	71	1	GO:0009127	BP	purine nucleoside monophosphate biosynthetic process	9	P60891
1	83	1	GO:0009156	BP	ribonucleoside monophosphate biosynthetic process	9	P60891
1	71	1	GO:0009168	BP	purine ribonucleoside monophosphate biosynthetic process	10	P60891
1	313	2	GO:0009165	BP	nucleotide biosynthetic process	8	P60891,P17812
1	264	2	GO:0009260	BP	ribonucleotide biosynthetic process	9	P60891,P17812
1	74	1	GO:0009142	BP	nucleoside triphosphate biosynthetic process	8	P17812
1	21	1	GO:0009148	BP	pyrimidine nucleoside triphosphate biosynthetic process	9	P17812
1	62	1	GO:0009201	BP	ribonucleoside triphosphate biosynthetic process	9	P17812
1	17	1	GO:0009209	BP	pyrimidine ribonucleoside triphosphate biosynthetic process	10	P17812
1.07e-25	3903	73	GO:0032774	BP	RNA biosynthetic process	7	P23511,Q9Y3F4,P30876,P16989,P67809,Q15645,P12814,Q12789,Q9NQ88,Q96FV9,O00625,P35637,P45973,Q96RN5,Q13243,Q86U42,Q9H307,O94906,O75832,O60828,Q13887,P56270,P29692,P36954,P41223,O60869,O00151,P07737,Q7KZ85,Q14839,P23246,Q9GZT3,Q07666,P22626,P18846,Q13247,Q9BW27,O43707,Q14498,P62826,Q13610,P10599,Q92541,Q14103,O00622,Q8WXI9,Q9BY44,Q8N726,O00422,O14979,Q9Y2V2,Q92621,Q5VTR2,P68104,Q01081,P11413,Q01130,…
9.57e-26	3781	72	GO:0097659	BP	nucleic acid-templated transcription	8	P23511,Q9Y3F4,P30876,P16989,P67809,Q15645,P12814,Q12789,Q9NQ88,Q96FV9,O00625,P35637,P45973,Q96RN5,Q13243,Q86U42,Q9H307,O94906,O75832,O60828,Q13887,P56270,P29692,P36954,P41223,O60869,O00151,P07737,Q7KZ85,Q14839,P23246,Q9GZT3,Q07666,P22626,P18846,Q13247,Q9BW27,O43707,Q14498,P62826,Q13610,P10599,Q92541,Q14103,O00622,Q8WXI9,Q9BY44,Q8N726,O00422,O14979,Q9Y2V2,Q5VTR2,P68104,Q01081,P11413,Q01130,Q96AE4,…
1	43	3	GO:0072528	BP	pyrimidine-containing compound biosynthetic process	6	P60891,P32320,P17812
1	12	1	GO:0008655	BP	pyrimidine-containing compound salvage	7	P32320
1	33	2	GO:0046134	BP	pyrimidine nucleoside biosynthetic process	7	P32320,P17812
1	23	1	GO:0046132	BP	pyrimidine ribonucleoside biosynthetic process	8	P17812
1	12	1	GO:0043097	BP	pyrimidine nucleoside salvage	8	P32320
1	32	2	GO:0006221	BP	pyrimidine nucleotide biosynthetic process	7	P60891,P17812
1	24	1	GO:0009220	BP	pyrimidine ribonucleotide biosynthetic process	8	P17812
1	16	1	GO:0006241	BP	CTP biosynthetic process	9	P17812
1	2	1	GO:0044210	BP	'de novo' CTP biosynthetic process	10	P17812
1	271	1	GO:0072522	BP	purine-containing compound biosynthetic process	6	P60891
1	99	1	GO:0042451	BP	purine nucleoside biosynthetic process	7	P60891
1	99	1	GO:0046129	BP	purine ribonucleoside biosynthetic process	8	P60891
1	10	1	GO:0009113	BP	purine nucleobase biosynthetic process	7	P60891
1	4	1	GO:0046101	BP	hypoxanthine biosynthetic process	8	P60891
1	257	1	GO:0006164	BP	purine nucleotide biosynthetic process	7	P60891
1	251	1	GO:0009152	BP	purine ribonucleotide biosynthetic process	8	P60891
1	7	1	GO:0006167	BP	AMP biosynthetic process	9	P60891
1.65e-40	5123	101	GO:0034645	BP	cellular macromolecule biosynthetic process	5	P23511,Q9Y3F4,P30876,P16989,P67809,Q15717,P60953,Q15645,Q00325,Q12789,Q13409,Q9NQ88,Q96FV9,O00625,P49588,P45973,Q96RN5,Q13243,Q86U42,Q9H307,O94906,Q05639,O75832,O60828,Q13887,P56270,P29692,P36954,Q04837,P04792,P41223,O60869,O00151,Q9UQE7,P07737,Q7KZ85,P26196,Q14839,Q96PU8,Q04446,Q04637,P24534,P23246,Q9GZT3,Q07666,P22626,P18846,Q13247,Q9BW27,Q14498,P62826,P63241,P09651,Q13610,P30419,P10599,Q92541,…
1	86	1	GO:0042158	BP	lipoprotein biosynthetic process	6	P30419
1	81	1	GO:0006497	BP	protein lipidation	7	P30419
1	6	1	GO:0006498	BP	N-terminal protein lipidation	8	P30419
1	5	1	GO:0018377	BP	protein myristoylation	8	P30419
1	4	1	GO:0006499	BP	N-terminal protein myristoylation	9	P30419
1	2	1	GO:0018008	BP	N-terminal peptidyl-glycine N-myristoylation	10	P30419
1	498	5	GO:0009101	BP	glycoprotein biosynthetic process	6	Q13409,Q10471,Q08379,Q06210,Q14203
1	424	5	GO:0006486	BP	protein glycosylation	7	Q13409,Q10471,Q08379,Q06210,Q14203
1	260	4	GO:0006487	BP	protein N-linked glycosylation	8	Q13409,Q08379,Q06210,Q14203
1	248	4	GO:0018279	BP	protein N-linked glycosylation via asparagine	9	Q13409,Q08379,Q06210,Q14203
1	101	1	GO:0006493	BP	protein O-linked glycosylation	8	Q10471
1	58	1	GO:0016266	BP	O-glycan processing	9	Q10471
1	4	1	GO:0018243	BP	protein O-linked glycosylation via threonine	9	Q10471
1	3	1	GO:0018242	BP	protein O-linked glycosylation via serine	9	Q10471
0.00427	338	10	GO:0006260	BP	DNA replication	6	P60953,Q96FV9,Q04837,Q9UQE7,P18846,P09651,P31949,P06493,P55209,P62937
1	57	2	GO:0006278	BP	RNA-dependent DNA replication	7	P09651,P62937
1	127	2	GO:0006261	BP	DNA-dependent DNA replication	7	Q96FV9,Q9UQE7
1	24	1	GO:0045005	BP	DNA-dependent DNA replication maintenance of fidelity	8	Q96FV9
1	21	1	GO:0031297	BP	replication fork processing	9	Q96FV9
1	50	1	GO:0044786	BP	cell cycle DNA replication	8	Q9UQE7
1	9	1	GO:0042023	BP	DNA endoreduplication	9	Q9UQE7
2.84e-14	677	26	GO:0006412	BP	translation	6	P16989,Q15717,Q00325,P49588,Q05639,P29692,P04792,P26196,Q96PU8,Q04637,P24534,Q07666,P22626,P62826,P63241,Q14103,P23381,Q9BY44,Q92879,P68104,P60842,P13639,P47813,Q9Y285,Q9ULC4,P26641
1	41	3	GO:0002181	BP	cytoplasmic translation	7	P16989,P13639,Q9ULC4
0.0105	219	8	GO:0006414	BP	translational elongation	6	P49588,Q05639,P29692,P24534,P63241,P68104,P13639,P26641
1	3	1	GO:0006452	BP	translational frameshifting	7	P63241
1.81e-23	3766	69	GO:0006351	BP	transcription, DNA-templated	6	P23511,Q9Y3F4,P30876,P16989,P67809,Q15645,Q12789,Q9NQ88,Q96FV9,O00625,P45973,Q96RN5,Q13243,Q86U42,Q9H307,O94906,O75832,O60828,Q13887,P56270,P29692,P36954,P41223,O60869,O00151,P07737,Q7KZ85,Q14839,P23246,Q9GZT3,Q07666,P22626,P18846,Q13247,Q9BW27,Q14498,P62826,Q13610,P10599,Q92541,Q14103,O00622,Q8WXI9,Q9BY44,Q8N726,O00422,O14979,Q9Y2V2,Q5VTR2,P68104,Q01081,P11413,Q01130,Q96AE4,Q13418,P46108,Q9NYV4,…
1	40	1	GO:0098781	BP	ncRNA transcription	7	Q12789
1	7	1	GO:0009304	BP	tRNA transcription	8	Q12789
1	30	1	GO:0009303	BP	rRNA transcription	8	Q12789
0.00834	96	6	GO:0006353	BP	DNA-templated transcription, termination	7	Q13243,Q86U42,P56270,Q13247,Q01081,Q01130
1	56	1	GO:0006383	BP	transcription from RNA polymerase III promoter	7	Q12789
1	6	1	GO:0042791	BP	5S class rRNA transcription from RNA polymerase III type 1 promoter	8	Q12789
1	6	1	GO:0042797	BP	tRNA transcription from RNA polymerase III promoter	8	Q12789
3.27e-16	2036	44	GO:0006366	BP	transcription from RNA polymerase II promoter	7	P23511,Q9Y3F4,P30876,P16989,P67809,Q15645,Q9NQ88,O00625,Q96RN5,Q13243,Q86U42,O94906,O75832,Q13887,P56270,P36954,P41223,P07737,Q7KZ85,Q14839,P23246,P22626,P18846,Q13247,P10599,Q92541,O00622,Q8WXI9,Q9BY44,Q8N726,O00422,Q01081,P11413,Q01130,Q96AE4,Q13418,P46108,Q9NYV4,P62633,P06493,P31947,O94992,P21333,Q99729
0.000114	47	6	GO:0006369	BP	termination of RNA polymerase II transcription	8	Q13243,Q86U42,P56270,Q13247,Q01081,Q01130
0.0222	321	9	GO:0006352	BP	DNA-templated transcription, initiation	7	P30876,Q9NQ88,Q96RN5,P56270,P36954,P10599,Q92541,P11413,P31947
0.0608	279	8	GO:0006367	BP	transcription initiation from RNA polymerase II promoter	8	P30876,Q9NQ88,Q96RN5,P56270,P36954,P10599,P11413,P31947
0.671	134	5	GO:0006354	BP	DNA-templated transcription, elongation	7	P30876,Q96FV9,P36954,Q7KZ85,Q92541
1	1	1	GO:0001192	BP	maintenance of transcriptional fidelity during DNA-templated transcription elongation	8	P36954
1	95	4	GO:0006368	BP	transcription elongation from RNA polymerase II promoter	8	P30876,P36954,Q7KZ85,Q92541
1	1	1	GO:0001193	BP	maintenance of transcriptional fidelity during DNA-templated transcription elongation from RNA polymerase II promoter	9	P36954
1	59	1	GO:0006360	BP	transcription from RNA polymerase I promoter	7	P21333
1	20	2	GO:0009299	BP	mRNA transcription	7	P29692,P21333
1	14	1	GO:0042789	BP	mRNA transcription from RNA polymerase II promoter	8	P21333
1	8	1	GO:0017183	BP	peptidyl-diphthamide biosynthetic process from peptidyl-histidine	5	P13639
1	320	4	GO:0006575	BP	cellular modified amino acid metabolic process	4	P06732,P47712,P11413,P26641
1	56	1	GO:0042398	BP	cellular modified amino acid biosynthetic process	5	P06732
1	1	1	GO:0006599	BP	phosphagen metabolic process	5	P06732
1	1	1	GO:0006603	BP	phosphocreatine metabolic process	6	P06732
1	1	1	GO:0042396	BP	phosphagen biosynthetic process	6	P06732
1	1	1	GO:0046314	BP	phosphocreatine biosynthetic process	7	P06732
1	59	2	GO:0006749	BP	glutathione metabolic process	5	P11413,P26641
0.0841	292	8	GO:0044262	BP	cellular carbohydrate metabolic process	4	Q9NQ88,P15121,Q04446,O14732,Q08379,Q96G03,P41236,Q06210
1	103	4	GO:0044264	BP	cellular polysaccharide metabolic process	5	Q04446,Q96G03,P41236,Q06210
1	87	4	GO:0006073	BP	cellular glucan metabolic process	6	Q04446,Q96G03,P41236,Q06210
1	86	4	GO:0005977	BP	glycogen metabolic process	7	Q04446,Q96G03,P41236,Q06210
1	20	1	GO:0019400	BP	alditol metabolic process	5	P15121
1	3	1	GO:0006059	BP	hexitol metabolic process	6	P15121
1	2	1	GO:0006060	BP	sorbitol metabolic process	7	P15121
0.0577	80	5	GO:0034637	BP	cellular carbohydrate biosynthetic process	5	P15121,Q04446,O14732,Q96G03,Q06210
1	5	1	GO:0019401	BP	alditol biosynthetic process	6	P15121
1	1	1	GO:0019406	BP	hexitol biosynthetic process	7	P15121
1	1	1	GO:0006061	BP	sorbitol biosynthetic process	8	P15121
1	68	3	GO:0033692	BP	cellular polysaccharide biosynthetic process	6	Q04446,Q96G03,Q06210
1	54	3	GO:0009250	BP	glucan biosynthetic process	7	Q04446,Q96G03,Q06210
1	54	3	GO:0005978	BP	glycogen biosynthetic process	8	Q04446,Q96G03,Q06210
1	10	1	GO:0046838	BP	phosphorylated carbohydrate dephosphorylation	5	O14732
1	9	1	GO:0046855	BP	inositol phosphate dephosphorylation	6	O14732
1	77	2	GO:0044275	BP	cellular carbohydrate catabolic process	5	Q9NQ88,Q96G03
1	30	1	GO:0044247	BP	cellular polysaccharide catabolic process	6	Q96G03
1	29	1	GO:0005980	BP	glycogen catabolic process	7	Q96G03
1	11	1	GO:0006020	BP	inositol metabolic process	5	O14732
1	4	1	GO:0006021	BP	inositol biosynthetic process	6	O14732
0.00408	85	6	GO:0006081	BP	cellular aldehyde metabolic process	4	O43488,Q9NQ88,P11413,Q96G03,Q04828,P42330
0.243	21	3	GO:0019682	BP	glyceraldehyde-3-phosphate metabolic process	5	Q9NQ88,P11413,Q96G03
0.15	18	3	GO:0006098	BP	pentose-phosphate shunt	6	Q9NQ88,P11413,Q96G03
1	3	1	GO:0009051	BP	pentose-phosphate shunt, oxidative branch	7	P11413
1.17e-06	1246	24	GO:0006082	BP	organic acid metabolic process	4	P49748,Q9NQ88,P40939,P49588,O75832,Q16698,P06732,Q96PU8,P47712,P26440,Q96I15,P51659,P23381,P13804,P60891,P00367,P16152,P42765,P17812,Q9Y285,Q04828,P42330,Q06210,P14174
4.85e-06	1230	23	GO:0043436	BP	oxoacid metabolic process	5	P49748,Q9NQ88,P40939,P49588,O75832,Q16698,P06732,Q96PU8,P47712,P26440,Q96I15,P51659,P23381,P13804,P00367,P16152,P42765,P17812,Q9Y285,Q04828,P42330,Q06210,P14174
6.39e-07	1106	23	GO:0019752	BP	carboxylic acid metabolic process	6	P49748,Q9NQ88,P40939,P49588,O75832,Q16698,P06732,Q96PU8,P47712,P26440,Q96I15,P51659,P23381,P13804,P00367,P16152,P42765,P17812,Q9Y285,Q04828,P42330,Q06210,P14174
1	38	1	GO:0072350	BP	tricarboxylic acid metabolic process	7	P00367
0.000777	612	14	GO:0032787	BP	monocarboxylic acid metabolic process	7	P49748,Q9NQ88,P40939,Q16698,Q96PU8,P47712,P26440,P51659,P13804,P16152,P42765,Q04828,P42330,P14174
1	105	1	GO:0006090	BP	pyruvate metabolic process	8	Q9NQ88
1	4	1	GO:0019660	BP	glycolytic fermentation	9	Q9NQ88
1	70	1	GO:0006096	BP	glycolytic process	9	Q9NQ88
1	16	1	GO:0006089	BP	lactate metabolic process	8	Q9NQ88
1	4	1	GO:0019659	BP	glucose catabolic process to lactate	9	Q9NQ88
1	4	1	GO:0019661	BP	glucose catabolic process to lactate via pyruvate	10	Q9NQ88
1	51	2	GO:0008206	BP	bile acid metabolic process	8	P51659,Q04828
1	104	1	GO:0043648	BP	dicarboxylic acid metabolic process	7	P00367
1	106	4	GO:0006690	BP	icosanoid metabolic process	7	P47712,P16152,P42330,P14174
0.0303	518	11	GO:0006520	BP	cellular amino acid metabolic process	7	P49588,O75832,P06732,P47712,P26440,Q96I15,P23381,P00367,P17812,Q9Y285,Q06210
1	351	6	GO:1901605	BP	alpha-amino acid metabolic process	8	P06732,P47712,P26440,P00367,P17812,Q06210
1	72	3	GO:0009064	BP	glutamine family amino acid metabolic process	9	P00367,P17812,Q06210
0.415	25	3	GO:0006541	BP	glutamine metabolic process	10	P00367,P17812,Q06210
1	32	1	GO:0006536	BP	glutamate metabolic process	10	P00367
1	11	1	GO:0006600	BP	creatine metabolic process	9	P06732
1	51	3	GO:0043038	BP	amino acid activation	8	P49588,P23381,Q9Y285
1	51	3	GO:0043039	BP	tRNA aminoacylation	9	P49588,P23381,Q9Y285
1	48	3	GO:0006418	BP	tRNA aminoacylation for protein translation	10	P49588,P23381,Q9Y285
1	3	1	GO:0006432	BP	phenylalanyl-tRNA aminoacylation	11	Q9Y285
1	2	1	GO:0006436	BP	tryptophanyl-tRNA aminoacylation	11	P23381
1	4	1	GO:0006419	BP	alanyl-tRNA aminoacylation	11	P49588
1	27	1	GO:0009081	BP	branched-chain amino acid metabolic process	8	P26440
1	6	1	GO:0006551	BP	leucine metabolic process	9	P26440
0.142	231	7	GO:0016054	BP	organic acid catabolic process	5	P49748,P40939,Q16698,P26440,P51659,P13804,P00367
0.142	231	7	GO:0046395	BP	carboxylic acid catabolic process	6	P49748,P40939,Q16698,P26440,P51659,P13804,P00367
0.0194	111	6	GO:0072329	BP	monocarboxylic acid catabolic process	7	P49748,P40939,Q16698,P26440,P51659,P13804
1	16	1	GO:0043649	BP	dicarboxylic acid catabolic process	7	P00367
1	123	2	GO:0009063	BP	cellular amino acid catabolic process	7	P26440,P00367
1	99	2	GO:1901606	BP	alpha-amino acid catabolic process	8	P26440,P00367
1	25	1	GO:0009065	BP	glutamine family amino acid catabolic process	9	P00367
1	7	1	GO:0006538	BP	glutamate catabolic process	10	P00367
1	24	1	GO:0009083	BP	branched-chain amino acid catabolic process	8	P26440
1	5	1	GO:0006552	BP	leucine catabolic process	9	P26440
0.131	311	8	GO:0016053	BP	organic acid biosynthetic process	5	P49748,Q96PU8,P47712,P51659,P00367,P16152,P42330,P14174
0.131	311	8	GO:0046394	BP	carboxylic acid biosynthetic process	6	P49748,Q96PU8,P47712,P51659,P00367,P16152,P42330,P14174
0.0983	218	7	GO:0072330	BP	monocarboxylic acid biosynthetic process	7	P49748,Q96PU8,P47712,P51659,P16152,P42330,P14174
1	29	1	GO:0006699	BP	bile acid biosynthetic process	8	P51659
1	14	1	GO:0043650	BP	dicarboxylic acid biosynthetic process	7	P00367
0.224	55	4	GO:0046456	BP	icosanoid biosynthetic process	7	P47712,P16152,P42330,P14174
1	91	1	GO:0008652	BP	cellular amino acid biosynthetic process	7	P00367
1	76	1	GO:1901607	BP	alpha-amino acid biosynthetic process	8	P00367
1	22	1	GO:0009084	BP	glutamine family amino acid biosynthetic process	9	P00367
1	6	1	GO:0006537	BP	glutamate biosynthetic process	10	P00367
1	13	1	GO:0046415	BP	urate metabolic process	5	P60891
1	2	1	GO:0034418	BP	urate biosynthetic process	6	P60891
0.0507	272	8	GO:0042180	BP	cellular ketone metabolic process	4	O43488,P49748,P15121,O75832,P47712,P16152,Q04828,P42330
1	34	1	GO:0042181	BP	ketone biosynthetic process	5	P42330
0.000403	30	5	GO:1901661	BP	quinone metabolic process	5	O43488,P15121,P16152,Q04828,P42330
1	6	1	GO:0042373	BP	vitamin K metabolic process	6	P16152
9.57e-05	9	4	GO:0044598	BP	doxorubicin metabolic process	6	O43488,P15121,Q04828,P42330
9.57e-05	9	4	GO:0044597	BP	daunorubicin metabolic process	6	O43488,P15121,Q04828,P42330
0.000282	1066	19	GO:0044255	BP	cellular lipid metabolic process	4	P60953,P49748,P40939,Q16698,Q96PU8,P47712,P26440,P51659,P13804,O14732,O00622,P07108,P16152,P42765,Q04828,P42330,Q06210,Q99829,P14174
1	131	2	GO:0006720	BP	isoprenoid metabolic process	5	Q04828,P42330
1	110	2	GO:0006721	BP	terpenoid metabolic process	6	Q04828,P42330
1	4	1	GO:0006714	BP	sesquiterpenoid metabolic process	7	P42330
1	99	2	GO:0016101	BP	diterpenoid metabolic process	7	Q04828,P42330
1	92	2	GO:0001523	BP	retinoid metabolic process	8	Q04828,P42330
1	13	2	GO:0042574	BP	retinal metabolic process	9	Q04828,P42330
1	9	1	GO:0016093	BP	polyprenol metabolic process	6	P42330
1	3	1	GO:0016487	BP	farnesol metabolic process	7	P42330
1	27	1	GO:0008299	BP	isoprenoid biosynthetic process	6	P42330
1	12	1	GO:0016114	BP	terpenoid biosynthetic process	7	P42330
1	10	1	GO:0016102	BP	diterpenoid biosynthetic process	8	P42330
1	163	1	GO:0006638	BP	neutral lipid metabolic process	5	P07108
1	394	5	GO:0046486	BP	glycerolipid metabolic process	5	P40939,P47712,O14732,P07108,Q99829
1	278	3	GO:0045017	BP	glycerolipid biosynthetic process	6	P40939,P47712,Q99829
1	162	1	GO:0006639	BP	acylglycerol metabolic process	6	P07108
1	153	1	GO:0006641	BP	triglyceride metabolic process	7	P07108
0.0482	195	7	GO:0030258	BP	lipid modification	5	P49748,P40939,Q16698,P26440,P51659,P13804,O14732
0.0094	98	6	GO:0034440	BP	lipid oxidation	6	P49748,P40939,Q16698,P26440,P51659,P13804
1	46	1	GO:0046834	BP	lipid phosphorylation	6	O14732
1	195	1	GO:0006643	BP	membrane lipid metabolic process	5	O00622
1	126	1	GO:0046467	BP	membrane lipid biosynthetic process	6	O00622
1	147	1	GO:0006665	BP	sphingolipid metabolic process	6	O00622
1	83	1	GO:0006672	BP	ceramide metabolic process	7	O00622
1	88	1	GO:0030148	BP	sphingolipid biosynthetic process	7	O00622
1	52	1	GO:0046513	BP	ceramide biosynthetic process	8	O00622
1	382	6	GO:0006644	BP	phospholipid metabolic process	5	P60953,P40939,P47712,O14732,P07108,Q99829
1	273	5	GO:0006650	BP	glycerophospholipid metabolic process	6	P40939,P47712,O14732,P07108,Q99829
1	37	2	GO:0046471	BP	phosphatidylglycerol metabolic process	7	P40939,P47712
1	15	2	GO:0032048	BP	cardiolipin metabolic process	8	P40939,P47712
0.995	7	2	GO:0035965	BP	cardiolipin acyl-chain remodeling	9	P40939,P47712
1	18	1	GO:0036148	BP	phosphatidylglycerol acyl-chain remodeling	8	P47712
1	151	2	GO:0046488	BP	phosphatidylinositol metabolic process	7	P47712,O14732
1	16	1	GO:0036149	BP	phosphatidylinositol acyl-chain remodeling	8	P47712
1	41	1	GO:0046854	BP	phosphatidylinositol phosphorylation	8	O14732
1	35	1	GO:0046473	BP	phosphatidic acid metabolic process	7	P47712
1	29	1	GO:0006658	BP	phosphatidylserine metabolic process	7	P47712
1	18	1	GO:0036150	BP	phosphatidylserine acyl-chain remodeling	8	P47712
1	5	1	GO:0046469	BP	platelet activating factor metabolic process	7	P47712
1	69	2	GO:0046470	BP	phosphatidylcholine metabolic process	7	P47712,P07108
1	24	1	GO:0036152	BP	phosphatidylethanolamine acyl-chain remodeling	8	P47712
1	27	2	GO:0036151	BP	phosphatidylcholine acyl-chain remodeling	8	P47712,P07108
1	243	3	GO:0008654	BP	phospholipid biosynthetic process	6	P40939,P47712,Q99829
1	211	3	GO:0046474	BP	glycerophospholipid biosynthetic process	7	P40939,P47712,Q99829
1	34	1	GO:0006654	BP	phosphatidic acid biosynthetic process	8	P47712
1	4	1	GO:0006663	BP	platelet activating factor biosynthetic process	8	P47712
0.00324	187	8	GO:0044242	BP	cellular lipid catabolic process	5	P49748,P40939,Q16698,P47712,P26440,P51659,P13804,P42330
1	9	1	GO:0008300	BP	isoprenoid catabolic process	6	P42330
1	7	1	GO:0016115	BP	terpenoid catabolic process	7	P42330
1	3	1	GO:0016107	BP	sesquiterpenoid catabolic process	8	P42330
1	4	1	GO:0016095	BP	polyprenol catabolic process	7	P42330
1	3	1	GO:0016488	BP	farnesol catabolic process	8	P42330
1	36	1	GO:0009395	BP	phospholipid catabolic process	6	P47712
1	74	1	GO:0006490	BP	oligosaccharide-lipid intermediate biosynthetic process	5	Q06210
1	74	1	GO:0006488	BP	dolichol-linked oligosaccharide biosynthetic process	6	Q06210
0.000162	375	12	GO:0006631	BP	fatty acid metabolic process	5	P49748,P40939,Q16698,Q96PU8,P47712,P26440,P51659,P13804,P16152,P42765,P42330,P14174
1	30	2	GO:0000038	BP	very long-chain fatty acid metabolic process	6	P49748,P51659
0.213	105	5	GO:0001676	BP	long-chain fatty acid metabolic process	6	Q96PU8,P47712,P51659,P16152,P42330
0.417	121	5	GO:0033559	BP	unsaturated fatty acid metabolic process	6	P47712,P51659,P16152,P42330,P14174
0.0366	35	4	GO:0006692	BP	prostanoid metabolic process	7	P47712,P16152,P42330,P14174
0.0366	35	4	GO:0006693	BP	prostaglandin metabolic process	8	P47712,P16152,P42330,P14174
1	13	1	GO:0036109	BP	alpha-linolenic acid metabolic process	7	P51659
1	68	3	GO:0019369	BP	arachidonic acid metabolic process	7	P47712,P16152,P42330
0.00834	96	6	GO:0019395	BP	fatty acid oxidation	6	P49748,P40939,Q16698,P26440,P51659,P13804
0.12	153	6	GO:0006633	BP	fatty acid biosynthetic process	6	P49748,Q96PU8,P47712,P16152,P42330,P14174
1	10	1	GO:0042759	BP	long-chain fatty acid biosynthetic process	7	Q96PU8
0.513	68	4	GO:0006636	BP	unsaturated fatty acid biosynthetic process	7	P47712,P16152,P42330,P14174
0.0169	29	4	GO:0046457	BP	prostanoid biosynthetic process	8	P47712,P16152,P42330,P14174
0.0169	29	4	GO:0001516	BP	prostaglandin biosynthetic process	9	P47712,P16152,P42330,P14174
1	15	2	GO:0019371	BP	cyclooxygenase pathway	10	P16152,P42330
0.00501	88	6	GO:0009062	BP	fatty acid catabolic process	6	P49748,P40939,Q16698,P26440,P51659,P13804
1	6	1	GO:0042760	BP	very long-chain fatty acid catabolic process	7	P49748
0.00129	70	6	GO:0006635	BP	fatty acid beta-oxidation	7	P49748,P40939,Q16698,P26440,P51659,P13804
0.178	19	3	GO:0033539	BP	fatty acid beta-oxidation using acyl-CoA dehydrogenase	8	P49748,P26440,P13804
1	11	1	GO:0033540	BP	fatty acid beta-oxidation using acyl-CoA oxidase	8	P51659
1	192	4	GO:0006805	BP	xenobiotic metabolic process	4	O43488,O60884,Q96DG6,Q04828
1	2	1	GO:0042197	BP	halogenated hydrocarbon metabolic process	5	O60884
1	2	1	GO:0042196	BP	chlorinated hydrocarbon metabolic process	6	O60884
1	1	1	GO:0018885	BP	carbon tetrachloride metabolic process	7	O60884
0.402	273	7	GO:0006413	BP	translational initiation	4	P04792,Q04637,Q07666,Q9BY44,P60842,P47813,Q9ULC4
1	12	1	GO:0002183	BP	cytoplasmic translational initiation	5	Q9ULC4
1	8	1	GO:0002190	BP	cap-independent translational initiation	6	Q9ULC4
1	5	1	GO:0002192	BP	IRES-dependent translational initiation	7	Q9ULC4
1	193	4	GO:0042445	BP	hormone metabolic process	3	P15121,P51659,Q04828,P42330
1	108	4	GO:0034754	BP	cellular hormone metabolic process	4	P15121,P51659,Q04828,P42330
1	35	3	GO:0008207	BP	C21-steroid hormone metabolic process	5	P15121,Q04828,P42330
1	17	2	GO:0042448	BP	progesterone metabolic process	6	Q04828,P42330
1	23	1	GO:0008210	BP	estrogen metabolic process	5	P51659
1	31	2	GO:0008209	BP	androgen metabolic process	5	P51659,P42330
1	24	1	GO:0042573	BP	retinoic acid metabolic process	5	P42330
1	9	1	GO:0002138	BP	retinoic acid biosynthetic process	6	P42330
1	66	2	GO:0042446	BP	hormone biosynthetic process	4	P15121,P42330
1	15	1	GO:0006702	BP	androgen biosynthetic process	5	P42330
1	6	1	GO:0061370	BP	testosterone biosynthetic process	6	P42330
1	23	1	GO:0006700	BP	C21-steroid hormone biosynthetic process	5	P15121
1	770	5	GO:0007610	BP	behavior	2	P04792,Q04637,Q7Z2T5,P07108,P04080
1	206	1	GO:0007626	BP	locomotory behavior	3	P04080
1	36	2	GO:0002209	BP	behavioral defense response	3	Q04637,P07108
1	446	3	GO:0044708	BP	single-organism behavior	3	Q04637,P07108,P04080
1	150	1	GO:0030534	BP	adult behavior	4	P04080
1	89	1	GO:0008344	BP	adult locomotory behavior	5	P04080
1	241	1	GO:0007611	BP	learning or memory	4	P07108
1	36	2	GO:0001662	BP	behavioral fear response	4	Q04637,P07108
3.54e-05	1853	27	GO:0040011	BP	locomotion	2	Q9Y3F4,P60953,P60709,Q14247,P60660,P35579,O75832,P04792,P07737,O15145,Q9GZT3,P09496,Q9BW27,O43707,O15143,P61160,P52565,O00622,P06396,Q5VTR2,O15511,Q13418,P06493,P62937,O75400,P14174,Q13509
0.00972	870	15	GO:0042330	BP	taxis	3	P60953,P60709,P60660,P35579,O75832,P04792,O15145,P09496,Q9BW27,O15143,P61160,O00622,O15511,P14174,Q13509
0.00972	870	15	GO:0006935	BP	chemotaxis	4	P60953,P60709,P60660,P35579,O75832,P04792,O15145,P09496,Q9BW27,O15143,P61160,O00622,O15511,P14174,Q13509
1	54	1	GO:0050918	BP	positive chemotaxis	5	P14174
0.0068	1320	19	GO:0048870	BP	cell motility	3	Q9Y3F4,P60953,Q14247,P35579,P04792,P07737,Q9GZT3,Q9BW27,O43707,P52565,O00622,P06396,Q5VTR2,O15511,Q13418,P06493,P62937,O75400,P14174
0.00812	1211	18	GO:0016477	BP	cell migration	4	Q9Y3F4,P60953,Q14247,P35579,P04792,P07737,Q9BW27,O43707,P52565,O00622,P06396,Q5VTR2,O15511,Q13418,P06493,P62937,O75400,P14174
1	66	1	GO:0014812	BP	muscle cell migration	5	Q13418
1	55	1	GO:0014909	BP	smooth muscle cell migration	6	Q13418
1	32	1	GO:0006929	BP	substrate-dependent cell migration	5	Q14247
1	323	5	GO:0001667	BP	ameboidal-type cell migration	5	Q9Y3F4,P35579,P04792,P07737,Q13418
1	39	1	GO:0010761	BP	fibroblast migration	6	Q13418
1	220	4	GO:0010631	BP	epithelial cell migration	6	Q9Y3F4,P35579,P04792,P07737
1	152	2	GO:0043542	BP	endothelial cell migration	7	P35579,P04792
1	72	2	GO:0043534	BP	blood vessel endothelial cell migration	8	P35579,P04792
1	362	5	GO:0050900	BP	leukocyte migration	5	P60953,P35579,Q9BW27,P62937,P14174
1	160	1	GO:0097529	BP	myeloid leukocyte migration	6	Q9BW27
1	27	1	GO:0036336	BP	dendritic cell migration	6	P60953
1	236	2	GO:0060326	BP	cell chemotaxis	5	P04792,Q9BW27
1	182	1	GO:0030595	BP	leukocyte chemotaxis	6	Q9BW27
1	27	1	GO:0048246	BP	macrophage chemotaxis	7	Q9BW27
1	25	1	GO:0035767	BP	endothelial cell chemotaxis	6	P04792
1	66	1	GO:0030317	BP	sperm motility	4	Q9GZT3
1.12e-11	2473	42	GO:0051704	BP	multi-organism process	2	P30876,P16989,Q15645,Q96EP5,Q9NQT4,Q13409,Q96FV9,P15121,P45973,P52272,P43487,Q86U42,O75832,Q14019,P36954,P04792,Q7KZ85,P26196,Q96PU8,Q13895,Q04637,P47712,P16949,Q9GZT3,Q9BW27,P62826,P13693,P09651,P30419,P06396,Q92879,Q92621,P60842,P61769,P06493,O75531,Q13151,P52292,P62937,Q15366,P14174,P26641
2.11e-08	841	22	GO:0044419	BP	interspecies interaction between organisms	3	P30876,Q13409,Q96FV9,P45973,P43487,Q86U42,O75832,P36954,Q7KZ85,P26196,Q04637,Q9BW27,P62826,P09651,P30419,P06396,Q92621,P60842,P61769,O75531,P52292,P62937
2.11e-08	841	22	GO:0044403	BP	symbiosis, encompassing mutualism through parasitism	4	P30876,Q13409,Q96FV9,P45973,P43487,Q86U42,O75832,P36954,Q7KZ85,P26196,Q04637,Q9BW27,P62826,P09651,P30419,P06396,Q92621,P60842,P61769,O75531,P52292,P62937
1	118	2	GO:0052192	BP	movement in environment of other organism involved in symbiotic interaction	5	P06396,P62937
1	118	2	GO:0051828	BP	entry into other organism involved in symbiotic interaction	6	P06396,P62937
1	118	2	GO:0051806	BP	entry into cell of other organism involved in symbiotic interaction	7	P06396,P62937
0.431	193	6	GO:0051701	BP	interaction with host	4	Q86U42,Q9BW27,P06396,Q92621,P52292,P62937
1	118	2	GO:0052126	BP	movement in host environment	5	P06396,P62937
1	118	2	GO:0044409	BP	entry into host	6	P06396,P62937
1	118	2	GO:0030260	BP	entry into host cell	7	P06396,P62937
1	38	2	GO:1902579	BP	multi-organism localization	3	Q96FV9,P62826
1	38	2	GO:0044766	BP	multi-organism transport	4	Q96FV9,P62826
1	34	2	GO:1902583	BP	multi-organism intracellular transport	5	Q96FV9,P62826
1	215	4	GO:0044033	BP	multi-organism metabolic process	3	P30876,P36954,Q9BW27,Q92621
1.12e-08	814	22	GO:0044764	BP	multi-organism cellular process	3	P30876,Q13409,Q96FV9,P45973,P43487,Q86U42,O75832,P36954,Q7KZ85,P26196,Q04637,Q9BW27,P62826,P09651,P30419,P06396,Q92621,P60842,P61769,O75531,P52292,P62937
8.21e-09	801	22	GO:0016032	BP	viral process	4	P30876,Q13409,Q96FV9,P45973,P43487,Q86U42,O75832,P36954,Q7KZ85,P26196,Q04637,Q9BW27,P62826,P09651,P30419,P06396,Q92621,P60842,P61769,O75531,P52292,P62937
1	11	2	GO:0019042	BP	viral latency	5	O75531,P62937
1	37	2	GO:0046794	BP	transport of virus	5	Q96FV9,P62826
1	1	1	GO:0019061	BP	uncoating of virus	5	P62937
0.00756	447	11	GO:0019058	BP	viral life cycle	5	P30876,Q96FV9,Q86U42,P36954,P26196,Q9BW27,P62826,P06396,Q92621,P52292,P62937
1	205	4	GO:0019080	BP	viral gene expression	6	P30876,P36954,Q9BW27,Q92621
1	194	4	GO:0019083	BP	viral transcription	7	P30876,P36954,Q9BW27,Q92621
1	114	1	GO:0046718	BP	viral entry into host cell	6	P06396
1	34	2	GO:0075733	BP	intracellular transport of virus	6	Q96FV9,P62826
1	8	1	GO:0046784	BP	viral mRNA export from host cell nucleus	7	Q96FV9
1	10	2	GO:0019043	BP	establishment of viral latency	5	O75531,P62937
1	8	2	GO:0075713	BP	establishment of integrated proviral latency	6	O75531,P62937
1	93	1	GO:0019079	BP	viral genome replication	5	P62937
1	35	1	GO:0019076	BP	viral release from host cell	5	P62937
1	259	4	GO:0044706	BP	multi-multicellular organism process	3	Q96EP5,P15121,Q13895,P47712
1	137	4	GO:0035821	BP	modification of morphology or physiology of other organism	3	Q86U42,Q9BW27,Q92621,P52292
1	118	4	GO:0051817	BP	modification of morphology or physiology of other organism involved in symbiotic interaction	4	Q86U42,Q9BW27,Q92621,P52292
0.748	75	4	GO:0044003	BP	modification by symbiont of host morphology or physiology	5	Q86U42,Q9BW27,Q92621,P52292
0.457	66	4	GO:0019048	BP	modulation by virus of host morphology or physiology	6	Q86U42,Q9BW27,Q92621,P52292
0.112	947	14	GO:0051707	BP	response to other organism	3	Q9NQT4,P52272,Q14019,P04792,Q13895,P47712,P16949,P13693,P61769,O75531,Q13151,Q15366,P14174,P26641
1	55	1	GO:0009620	BP	response to fungus	4	Q14019
0.974	417	8	GO:0009615	BP	response to virus	4	Q9NQT4,P04792,P16949,P13693,P61769,O75531,Q15366,P26641
1	563	6	GO:0009617	BP	response to bacterium	4	P52272,Q13895,P47712,P61769,Q13151,P14174
1	343	6	GO:0002237	BP	response to molecule of bacterial origin	5	P52272,Q13895,P47712,P61769,Q13151,P14174
1	330	6	GO:0032496	BP	response to lipopolysaccharide	6	P52272,Q13895,P47712,P61769,Q13151,P14174
1	165	4	GO:0071219	BP	cellular response to molecule of bacterial origin	6	P52272,Q13895,P61769,P14174
1	158	4	GO:0071222	BP	cellular response to lipopolysaccharide	7	P52272,Q13895,P61769,P14174
1	583	4	GO:0098542	BP	defense response to other organism	4	Q9NQT4,Q14019,P61769,Q15366
1	257	1	GO:0042742	BP	defense response to bacterium	5	P61769
1	80	1	GO:0050830	BP	defense response to Gram-positive bacterium	6	P61769
1	44	1	GO:0050829	BP	defense response to Gram-negative bacterium	6	P61769
1	40	1	GO:0050832	BP	defense response to fungus	5	Q14019
1	333	3	GO:0051607	BP	defense response to virus	5	Q9NQT4,P61769,Q15366
1	61	1	GO:0019730	BP	antimicrobial humoral response	4	P61769
1	55	1	GO:0019731	BP	antibacterial humoral response	5	P61769
3.77e-22	6347	87	GO:0023052	BP	signaling	2	Q14847,Q9Y3F4,P16989,P67809,Q96QK1,P60953,P49748,P60709,Q96FV9,P15121,Q14247,P30040,P49588,P60660,P43487,P35579,O75832,P29692,O14737,P04792,P41223,Q9UQE7,O15145,Q04637,P23246,P16949,Q14696,Q07666,P09496,P18846,P02795,Q9BW27,O43707,O15143,P62826,P13693,Q9UJU6,P30419,P10599,P30154,Q92541,P61160,O14732,P52565,O00622,Q9BY44,P21281,Q8N726,P06396,P00367,Q9Y2V2,P07108,Q92621,P32320,P60842,O15511,P31949,…
3.38e-22	6337	87	GO:0044700	BP	single organism signaling	3	Q14847,Q9Y3F4,P16989,P67809,Q96QK1,P60953,P49748,P60709,Q96FV9,P15121,Q14247,P30040,P49588,P60660,P43487,P35579,O75832,P29692,O14737,P04792,P41223,Q9UQE7,O15145,Q04637,P23246,P16949,Q14696,Q07666,P09496,P18846,P02795,Q9BW27,O43707,O15143,P62826,P13693,Q9UJU6,P30419,P10599,P30154,Q92541,P61160,O14732,P52565,O00622,Q9BY44,P21281,Q8N726,P06396,P00367,Q9Y2V2,P07108,Q92621,P32320,P60842,O15511,P31949,…
1	1229	7	GO:0007267	BP	cell-cell signaling	4	P60953,P10599,O00622,P00367,P07108,Q8N183,P62879
1	716	2	GO:0099536	BP	synaptic signaling	5	P07108,P62879
1	716	2	GO:0099537	BP	trans-synaptic signaling	6	P07108,P62879
1	716	2	GO:0007268	BP	synaptic transmission	7	P07108,P62879
1	450	2	GO:0023061	BP	signal release	5	P00367,Q8N183
1	329	2	GO:0046879	BP	hormone secretion	6	P00367,Q8N183
1	273	2	GO:0030072	BP	peptide hormone secretion	7	P00367,Q8N183
1	229	2	GO:0030073	BP	insulin secretion	8	P00367,Q8N183
1	60	1	GO:0035773	BP	insulin secretion involved in cellular response to glucose stimulus	9	Q8N183
1	7	1	GO:0060684	BP	epithelial-mesenchymal cell signaling	5	P60953
3.88e-45	6327	116	GO:0071840	BP	cellular component organization or biogenesis	2	Q6FI81,Q9Y3F4,P27816,Q9UKD2,P60953,Q15645,P12814,P60709,Q9NQT4,Q13409,Q9NQ88,Q14247,P60660,Q9Y5L4,P43487,O00541,P35579,Q13243,O94906,O00567,O75832,O60828,Q13887,Q16698,P04350,O14737,Q04837,Q9UQE7,P07737,Q7KZ85,P26196,O15145,Q14839,Q9NU22,Q13895,Q14677,P23246,P47712,P16949,Q9GZT3,Q9GZZ1,Q16181,P09496,P18846,P33552,Q13247,Q9BW27,P60981,O43707,O15143,P62826,O75153,P63241,P09651,Q9UJU6,P30419,P30154,…
1.19e-29	2671	66	GO:0044085	BP	cellular component biogenesis	3	Q6FI81,Q9Y3F4,Q9UKD2,P60953,Q15645,P12814,P60709,Q9NQT4,Q14247,O00541,Q13243,O94906,O00567,O75832,O60828,Q13887,Q16698,P07737,P26196,O15145,Q14839,Q9NU22,Q13895,P16949,Q16181,P18846,Q13247,Q9BW27,O43707,O15143,P62826,Q9UJU6,P30154,Q02241,P61160,O00622,Q9BY44,Q8N726,P06396,Q92879,Q92621,P32320,P68032,O15511,Q96HC4,Q8N183,Q13418,Q08379,Q2NL82,Q15019,P06493,Q01780,P07355,Q9UNN5,P55209,Q04828,P07437,…
4.39e-15	1400	36	GO:0070271	BP	protein complex biogenesis	4	P60953,Q14247,O75832,Q16698,P07737,O15145,Q14839,Q9NU22,P16949,Q16181,P18846,O15143,Q9UJU6,P30154,Q02241,P61160,P06396,Q92621,P32320,O15511,Q8N183,Q13418,Q08379,P06493,P07355,Q9UNN5,P55209,Q04828,P07437,P21333,P60903,P62805,Q06210,O60749,Q99733,P14174
1	63	1	GO:0097031	BP	mitochondrial respiratory chain complex I biogenesis	5	Q8N183
1	33	2	GO:0044091	BP	membrane biogenesis	4	P07355,P60903
8.21e-12	382	19	GO:0022613	BP	ribonucleoprotein complex biogenesis	4	Q9Y3F4,Q9UKD2,Q9NQT4,O00541,Q13243,O94906,O00567,O60828,P26196,Q9NU22,Q13895,Q13247,P62826,Q9BY44,Q8N726,Q92879,Q2NL82,Q01780,Q9ULC4
1.21e-05	235	11	GO:0042254	BP	ribosome biogenesis	5	Q9UKD2,Q9NQT4,O00541,O00567,Q9NU22,Q13895,P62826,Q9BY44,Q8N726,Q2NL82,Q01780
0.129	155	6	GO:0006364	BP	rRNA processing	6	Q9NQT4,O00541,O00567,Q13895,Q8N726,Q01780
1	22	2	GO:0000460	BP	maturation of 5.8S rRNA	7	O00541,Q01780
1	16	1	GO:0000466	BP	maturation of 5.8S rRNA from tricistronic rRNA transcript (SSU-rRNA, 5.8S rRNA, LSU-rRNA)	8	O00541
1	22	1	GO:0000154	BP	rRNA modification	7	O00567
1	11	1	GO:0031125	BP	rRNA 3'-end processing	7	Q9NQT4
1	8	1	GO:0000054	BP	ribosomal subunit export from nucleus	6	P62826
1	4	1	GO:0000056	BP	ribosomal small subunit export from nucleus	7	P62826
1	6	1	GO:0000055	BP	ribosomal large subunit export from nucleus	7	P62826
1	49	1	GO:0042274	BP	ribosomal small subunit biogenesis	5	Q13895
1	32	1	GO:0030490	BP	maturation of SSU-rRNA	6	Q13895
1	26	1	GO:0000462	BP	maturation of SSU-rRNA from tricistronic rRNA transcript (SSU-rRNA, 5.8S rRNA, LSU-rRNA)	7	Q13895
1	43	2	GO:0042273	BP	ribosomal large subunit biogenesis	5	O00541,Q9NU22
1	10	1	GO:0000470	BP	maturation of LSU-rRNA	6	O00541
1	9	1	GO:0000463	BP	maturation of LSU-rRNA from tricistronic rRNA transcript (SSU-rRNA, 5.8S rRNA, LSU-rRNA)	7	O00541
1.3e-41	6199	111	GO:0016043	BP	cellular component organization	3	Q6FI81,Q9Y3F4,P27816,P60953,Q15645,P12814,P60709,Q13409,Q9NQ88,Q14247,P60660,Q9Y5L4,P43487,O00541,P35579,Q13243,O94906,O75832,O60828,Q13887,Q16698,P04350,O14737,Q04837,Q9UQE7,P07737,Q7KZ85,P26196,O15145,Q14839,Q9NU22,Q14677,P23246,P47712,P16949,Q9GZT3,Q9GZZ1,Q16181,P09496,P18846,P33552,Q13247,Q9BW27,P60981,O43707,O15143,P62826,O75153,P63241,P09651,Q9UJU6,P30419,P30154,Q02241,Q92541,P61160,P52565,…
7.54e-32	2636	68	GO:0043933	BP	macromolecular complex subunit organization	4	Q9Y3F4,P27816,P60953,P12814,P60709,Q14247,P43487,P35579,Q13243,O94906,O75832,O60828,Q16698,Q9UQE7,P07737,Q7KZ85,P26196,O15145,Q14839,Q9NU22,P23246,P16949,Q9GZZ1,Q16181,P18846,Q13247,P60981,O43707,O15143,P62826,P63241,Q9UJU6,P30154,Q02241,Q92541,P61160,Q8WXI9,Q9BY44,Q8N726,P06396,Q92879,O00422,Q92621,Q5VTR2,P32320,P68032,O15511,Q8N183,Q13418,Q08379,Q2NL82,Q96FW1,P06493,P07355,Q9UNN5,P55209,Q04828,…
4.33e-06	213	11	GO:0071826	BP	ribonucleoprotein complex subunit organization	5	Q9Y3F4,Q13243,O94906,O60828,P26196,Q9NU22,Q13247,Q9BY44,Q92879,Q2NL82,Q9ULC4
1	220	3	GO:0071824	BP	protein-DNA complex subunit organization	5	P55209,P62805,Q99733
5.04e-21	1879	48	GO:0071822	BP	protein complex subunit organization	5	P27816,P60953,P12814,Q14247,P43487,P35579,O75832,Q16698,Q9UQE7,P07737,O15145,Q14839,Q9NU22,P16949,Q16181,P18846,P60981,O43707,O15143,P62826,P63241,Q9UJU6,P30154,Q02241,P61160,P06396,Q92621,P32320,P68032,O15511,Q8N183,Q13418,Q08379,P06493,P07355,Q9UNN5,P55209,Q04828,P07437,P21333,P60903,P62805,Q06210,O43663,O60749,Q99733,P62328,P14174
0.0023	773	15	GO:0022411	BP	cellular component disassembly	4	Q9NQ88,Q14247,P16949,Q9BW27,P60981,P63241,Q9UJU6,Q8N726,P06396,Q92621,Q01081,Q08379,P06493,O75531,Q9ULC4
1	320	5	GO:0032984	BP	macromolecular complex disassembly	5	P16949,P60981,P63241,P06396,Q9ULC4
1	11	1	GO:0032988	BP	ribonucleoprotein complex disassembly	6	Q9ULC4
1	309	4	GO:0043241	BP	protein complex disassembly	6	P16949,P60981,P63241,P06396
1	285	4	GO:0043624	BP	cellular protein complex disassembly	7	P16949,P60981,P63241,P06396
1	101	3	GO:0051261	BP	protein depolymerization	8	P16949,P60981,P06396
1	179	1	GO:0006415	BP	translational termination	8	P63241
1	69	3	GO:0006921	BP	cellular component disassembly involved in execution phase of apoptosis	5	Q9UJU6,Q8N726,P06396
1	30	1	GO:0030262	BP	apoptotic nuclear changes	6	Q8N726
1	18	1	GO:0006309	BP	apoptotic DNA fragmentation	7	Q8N726
0.0421	265	8	GO:0034330	BP	cell junction organization	4	P60953,P12814,P60709,Q14247,O43707,Q13418,P21333,P60903
1	232	6	GO:0045216	BP	cell-cell junction organization	5	P60953,P12814,P60709,Q14247,O43707,P60903
0.417	121	5	GO:0034332	BP	adherens junction organization	6	P60953,P12814,P60709,Q14247,P60903
1	546	8	GO:0010256	BP	endomembrane system organization	4	P60953,Q9BW27,Q92621,Q08379,P06493,O75531,P07355,P60903
2.8e-05	1129	21	GO:0061024	BP	membrane organization	4	P60709,Q13409,P35579,O14737,Q14677,P47712,P09496,Q9BW27,P30419,P06396,Q92621,Q9NRR5,Q08379,P42765,P06493,O75531,P31947,P07355,P21333,P60903,Q14203
0.0178	915	15	GO:0044802	BP	single-organism membrane organization	5	O14737,P47712,Q9BW27,P30419,P06396,Q92621,Q9NRR5,Q08379,P42765,P06493,O75531,P31947,P07355,P21333,P60903
0.11	46	4	GO:0030397	BP	membrane disassembly	6	Q9BW27,Q92621,P06493,O75531
0.15	18	3	GO:0031579	BP	membrane raft organization	6	P06396,P07355,P60903
1	4	1	GO:0031580	BP	membrane raft distribution	7	P06396
1	1	1	GO:0044855	BP	plasma membrane raft distribution	8	P06396
1	4	1	GO:0001766	BP	membrane raft polarization	8	P06396
1	1	1	GO:0044858	BP	plasma membrane raft polarization	9	P06396
1	274	2	GO:0007009	BP	plasma membrane organization	6	P07355,P60903
1	497	7	GO:0072657	BP	protein localization to membrane	6	O14737,P30419,P06396,P31947,P07355,P21333,P60903
1	46	2	GO:0043113	BP	receptor clustering	7	P06396,P21333
1	372	5	GO:0090150	BP	establishment of protein localization to membrane	7	O14737,P30419,P31947,P07355,P60903
1	211	2	GO:0072659	BP	protein localization to plasma membrane	7	P07355,P60903
1	140	2	GO:0090002	BP	establishment of protein localization to plasma membrane	8	P07355,P60903
1	200	1	GO:0006612	BP	protein targeting to membrane	7	P07355
1	25	1	GO:0072661	BP	protein targeting to plasma membrane	8	P07355
1	45	2	GO:0051205	BP	protein insertion into membrane	6	P30419,P31947
1	170	3	GO:0061025	BP	membrane fusion	5	P47712,Q9NRR5,P07355
1	142	3	GO:0044801	BP	single-organism membrane fusion	6	P47712,Q9NRR5,P07355
1	65	2	GO:0010324	BP	membrane invagination	5	P35579,P06396
1	55	2	GO:0006911	BP	phagocytosis, engulfment	6	P35579,P06396
1.28e-36	3711	84	GO:0006996	BP	organelle organization	4	P27816,P60953,Q15645,P12814,P60709,Q13409,Q9NQ88,Q14247,Q9Y5L4,P43487,O00541,P35579,O75832,O60828,P04350,O14737,Q04837,Q9UQE7,P07737,Q7KZ85,P26196,O15145,Q14839,Q9NU22,P23246,P47712,P16949,Q9GZT3,Q9GZZ1,Q16181,P33552,Q9BW27,P60981,O43707,O15143,P62826,O75153,P09651,Q9UJU6,P30419,Q02241,Q92541,P61160,Q8WXI9,Q9HC35,Q9BY44,Q8N726,P06396,O00422,Q92621,Q5VTR2,P68032,Q01081,Q9NRR5,O15511,Q8N183,Q10713,…
1.52e-07	589	18	GO:0048285	BP	organelle fission	5	P60953,Q15645,P43487,Q9UQE7,Q9GZZ1,Q16181,P33552,P62826,Q02241,P61160,Q9HC35,Q08379,Q96KB5,Q15019,P06493,P21333,Q14203,Q13509
5e-08	550	18	GO:0000280	BP	nuclear division	6	P60953,Q15645,P43487,Q9UQE7,Q9GZZ1,Q16181,P33552,P62826,Q02241,P61160,Q9HC35,Q08379,Q96KB5,Q15019,P06493,P21333,Q14203,Q13509
1	15	2	GO:0048308	BP	organelle inheritance	5	Q08379,P06493
1.34e-23	2656	59	GO:1902589	BP	single-organism organelle organization	5	P27816,P60953,Q15645,P12814,Q9NQ88,Q14247,P43487,P35579,O14737,Q04837,Q9UQE7,P07737,Q7KZ85,O15145,Q14839,P23246,P47712,P16949,Q9GZT3,Q9GZZ1,Q16181,P33552,P60981,O43707,O15143,P62826,O75153,P09651,P30419,Q02241,Q92541,P61160,Q9HC35,Q8N726,P06396,Q5VTR2,P68032,Q01081,Q9NRR5,O15511,Q13418,Q08379,P46108,P42765,Q96FW1,Q96KB5,Q15019,P06493,P31947,P07355,P07437,P21333,P60903,P62805,O43663,Q14203,P62328,…
0.167	237	7	GO:1903008	BP	organelle disassembly	6	Q9NQ88,Q14247,Q8N726,Q01081,Q08379,P06493,Q9ULC4
1	219	4	GO:0061726	BP	mitochondrion disassembly	7	Q9NQ88,Q14247,Q8N726,Q01081
1	8	1	GO:0032790	BP	ribosome disassembly	7	Q9ULC4
9.61e-07	427	15	GO:0007067	BP	mitotic nuclear division	6	P60953,P43487,Q9UQE7,Q9GZZ1,Q16181,P62826,Q02241,Q9HC35,Q08379,Q96KB5,Q15019,P06493,P21333,Q14203,Q13509
0.604	131	5	GO:0006997	BP	nucleus organization	5	O00541,Q9BW27,Q92621,P06493,O75531
1	5	1	GO:0007000	BP	nucleolus organization	6	O00541
1	13	1	GO:0006999	BP	nuclear pore organization	6	Q92621
0.787	76	4	GO:0006998	BP	nuclear envelope organization	6	Q9BW27,Q92621,P06493,O75531
1	13	1	GO:0031468	BP	nuclear envelope reassembly	7	O75531
1	10	1	GO:0007084	BP	mitotic nuclear envelope reassembly	8	O75531
0.11	46	4	GO:0051081	BP	nuclear envelope disassembly	7	Q9BW27,Q92621,P06493,O75531
0.0922	44	4	GO:0007077	BP	mitotic nuclear envelope disassembly	8	Q9BW27,Q92621,P06493,O75531
0.00294	1126	18	GO:0051276	BP	chromosome organization	5	Q15645,P60709,Q9UQE7,Q7KZ85,Q14839,P23246,Q9GZZ1,P09651,Q92541,Q8WXI9,Q8N726,O00422,Q5VTR2,Q96FW1,P06493,P55209,P62805,Q99733
1	145	2	GO:0032200	BP	telomere organization	6	P09651,P62805
1	132	2	GO:0000723	BP	telomere maintenance	7	P09651,P62805
1	84	1	GO:0010833	BP	telomere maintenance via telomere lengthening	8	P09651
1	54	1	GO:0007004	BP	telomere maintenance via telomerase	9	P09651
1	263	6	GO:0071103	BP	DNA conformation change	6	Q14839,Q8N726,P06493,P55209,P62805,Q99733
1	200	5	GO:0006323	BP	DNA packaging	7	Q8N726,P06493,P55209,P62805,Q99733
1	31	1	GO:0030261	BP	chromosome condensation	8	P06493
1	63	1	GO:0032392	BP	DNA geometric change	7	Q14839
1	58	1	GO:0032508	BP	DNA duplex unwinding	8	Q14839
1	23	1	GO:0070193	BP	synaptonemal complex organization	6	Q15645
0.00212	768	15	GO:0006325	BP	chromatin organization	6	P60709,Q7KZ85,Q14839,P23246,Q9GZZ1,Q92541,Q8WXI9,Q8N726,O00422,Q5VTR2,Q96FW1,P06493,P55209,P62805,Q99733
1	42	1	GO:0061641	BP	CENP-A containing chromatin organization	7	P62805
1	187	4	GO:0006333	BP	chromatin assembly or disassembly	7	Q8N726,P55209,P62805,Q99733
0.0276	614	12	GO:0016568	BP	chromatin modification	7	P60709,Q7KZ85,Q14839,P23246,Q9GZZ1,Q92541,Q8WXI9,Q8N726,Q5VTR2,Q96FW1,P06493,P62805
1	442	8	GO:0016569	BP	covalent chromatin modification	8	Q7KZ85,P23246,Q9GZZ1,Q92541,Q5VTR2,Q96FW1,P06493,P62805
1	429	8	GO:0016570	BP	histone modification	9	Q7KZ85,P23246,Q9GZZ1,Q92541,Q5VTR2,Q96FW1,P06493,P62805
1	40	1	GO:0016577	BP	histone demethylation	10	P62805
1	38	1	GO:0070076	BP	histone lysine demethylation	11	P62805
1	16	1	GO:0035574	BP	histone H4-K20 demethylation	12	P62805
1	40	2	GO:0016574	BP	histone ubiquitination	10	Q5VTR2,Q96FW1
1	10	1	GO:0033523	BP	histone H2B ubiquitination	11	Q5VTR2
1	19	1	GO:0033522	BP	histone H2A ubiquitination	11	Q96FW1
1	5	1	GO:0070535	BP	histone H2A K63-linked ubiquitination	12	Q96FW1
1	23	1	GO:0010390	BP	histone monoubiquitination	11	Q5VTR2
1	68	1	GO:0016575	BP	histone deacetylation	10	P23246
1	22	1	GO:0070932	BP	histone H3 deacetylation	11	P23246
1	127	3	GO:0016571	BP	histone methylation	10	Q7KZ85,Q92541,Q5VTR2
1	99	2	GO:0034968	BP	histone lysine methylation	11	Q7KZ85,Q92541
1	15	1	GO:0070734	BP	histone H3-K27 methylation	12	Q7KZ85
1	53	1	GO:0051568	BP	histone H3-K4 methylation	12	Q92541
1	12	1	GO:0080182	BP	histone H3-K4 trimethylation	13	Q92541
1	32	1	GO:0016572	BP	histone phosphorylation	10	P06493
1	151	1	GO:0016573	BP	histone acetylation	10	Q9GZZ1
1	64	1	GO:0043967	BP	histone H4 acetylation	11	Q9GZZ1
0.115	152	6	GO:0006338	BP	chromatin remodeling	8	P60709,Q7KZ85,Q14839,Q8WXI9,Q8N726,P62805
1	44	1	GO:0031055	BP	chromatin remodeling at centromere	9	P62805
0.748	75	4	GO:0043044	BP	ATP-dependent chromatin remodeling	9	P60709,Q14839,Q8WXI9,P62805
1	14	1	GO:0070828	BP	heterochromatin organization	7	Q8N726
1	171	3	GO:0034728	BP	nucleosome organization	7	P55209,P62805,Q99733
1	32	1	GO:0034723	BP	DNA replication-dependent nucleosome organization	8	P62805
1	53	1	GO:0034724	BP	DNA replication-independent nucleosome organization	8	P62805
1	54	1	GO:0043486	BP	histone exchange	8	P62805
1	153	3	GO:0000819	BP	sister chromatid segregation	6	Q9UQE7,P23246,Q9GZZ1
1	129	2	GO:0000070	BP	mitotic sister chromatid segregation	7	Q9UQE7,Q9GZZ1
1	43	3	GO:0007062	BP	sister chromatid cohesion	6	Q9UQE7,P23246,Q9GZZ1
1	7	1	GO:0070601	BP	centromeric sister chromatid cohesion	7	Q9GZZ1
1	17	2	GO:0007064	BP	mitotic sister chromatid cohesion	7	Q9UQE7,Q9GZZ1
1	1	1	GO:0071962	BP	mitotic sister chromatid cohesion, centromeric	8	Q9GZZ1
1	285	5	GO:0016050	BP	vesicle organization	5	P47712,Q08379,P07355,P60903,O60749
1	125	3	GO:0006900	BP	membrane budding	6	Q08379,P07355,P60903
1	83	1	GO:0006901	BP	vesicle coating	7	Q08379
1	84	1	GO:1902591	BP	single-organism membrane budding	7	Q08379
1	65	1	GO:0090114	BP	COPII-coated vesicle budding	8	Q08379
1	14	1	GO:0034389	BP	lipid particle organization	5	P62937
1	129	4	GO:0048284	BP	organelle fusion	5	P47712,Q9NRR5,P06493,P07355
1	1	1	GO:0000741	BP	karyogamy	6	P06493
1	102	3	GO:0090174	BP	organelle membrane fusion	6	P47712,Q9NRR5,P07355
1	82	2	GO:0006906	BP	vesicle fusion	7	P47712,P07355
0.00202	765	15	GO:0007005	BP	mitochondrion organization	5	Q9NQ88,Q14247,Q9Y5L4,O75832,O14737,Q04837,Q9GZT3,O75153,P30419,Q8N726,Q01081,Q8N183,Q10713,P42765,P31947
1	97	4	GO:0007006	BP	mitochondrial membrane organization	6	O14737,P30419,P42765,P31947
1	10	1	GO:0090151	BP	establishment of protein localization to mitochondrial membrane	7	O14737
1	9	1	GO:0007008	BP	outer mitochondrial membrane organization	7	O14737
1	65	3	GO:0046902	BP	regulation of mitochondrial membrane permeability	7	P30419,P42765,P31947
1	3	1	GO:0035795	BP	negative regulation of mitochondrial membrane permeability	8	P42765
1	53	3	GO:0035794	BP	positive regulation of mitochondrial membrane permeability	8	P30419,P42765,P31947
1	51	3	GO:1902686	BP	mitochondrial outer membrane permeabilization involved in programmed cell death	9	P30419,P42765,P31947
1	30	2	GO:0051204	BP	protein insertion into mitochondrial membrane	7	P30419,P31947
0.0289	119	6	GO:0008637	BP	apoptotic mitochondrial changes	6	O75832,O14737,P30419,Q8N726,P42765,P31947
1	56	3	GO:1902108	BP	regulation of mitochondrial membrane permeability involved in apoptotic process	7	P30419,P42765,P31947
1	2	1	GO:1902109	BP	negative regulation of mitochondrial membrane permeability involved in apoptotic process	8	P42765
1	51	3	GO:1902110	BP	positive regulation of mitochondrial membrane permeability involved in apoptotic process	8	P30419,P42765,P31947
1	11	1	GO:0048311	BP	mitochondrion distribution	6	O75153
1	6	1	GO:0048312	BP	intracellular distribution of mitochondria	7	O75153
1	219	4	GO:0000422	BP	mitophagy	6	Q9NQ88,Q14247,Q8N726,Q01081
1	158	1	GO:0000423	BP	macromitophagy	7	Q9NQ88
1	159	5	GO:0006626	BP	protein targeting to mitochondrion	6	Q9Y5L4,O14737,Q8N726,Q01081,Q10713
1	6	1	GO:0006627	BP	protein processing involved in protein targeting to mitochondrion	7	Q10713
1	6	1	GO:0045040	BP	protein import into mitochondrial outer membrane	7	O14737
1	147	1	GO:0007033	BP	vacuole organization	5	Q9NRR5
1	24	1	GO:0097576	BP	vacuole fusion	6	Q9NRR5
1	23	1	GO:0097352	BP	autophagosome maturation	7	Q9NRR5
6.71e-13	1091	30	GO:0007010	BP	cytoskeleton organization	5	P27816,P60953,P12814,Q14247,P43487,P35579,Q9UQE7,P07737,O15145,Q14839,P16949,P60981,O43707,O15143,P62826,Q02241,P61160,P06396,P68032,O15511,Q13418,Q08379,P46108,P06493,P07437,O75400,P21333,P60903,O43663,P62328
6.38e-09	556	19	GO:0030036	BP	actin cytoskeleton organization	6	P60953,P12814,Q14247,P35579,P07737,O15145,P60981,O43707,O15143,P62826,P61160,P06396,P68032,O15511,Q13418,P46108,P21333,P60903,P62328
1	84	4	GO:0031532	BP	actin cytoskeleton reorganization	7	Q14247,P35579,P06396,P21333
1	150	4	GO:0031032	BP	actomyosin structure organization	7	P35579,P07737,P68032,P60903
2.43e-08	328	15	GO:0007015	BP	actin filament organization	7	P60953,P12814,Q14247,P07737,O15145,P60981,O43707,O15143,P61160,P06396,P68032,O15511,P21333,P60903,P62328
1	4	1	GO:0051639	BP	actin filament network formation	8	P12814
1	3	1	GO:0090135	BP	actin filament branching	8	P60953
1	8	2	GO:0051764	BP	actin crosslink formation	8	P12814,P21333
0.523	127	5	GO:0061572	BP	actin filament bundle organization	8	P60953,P12814,P07737,O43707,P60903
0.00351	189	8	GO:0008154	BP	actin polymerization or depolymerization	8	Q14247,P07737,O15145,P60981,O15143,P61160,P06396,O15511
1	53	2	GO:0030042	BP	actin filament depolymerization	9	P60981,P06396
1	6	1	GO:0090527	BP	actin filament reorganization	8	P06396
1.12e-05	434	14	GO:0000226	BP	microtubule cytoskeleton organization	6	P27816,P60953,P43487,P35579,Q9UQE7,Q14839,P16949,P62826,Q02241,Q08379,P06493,P07437,P21333,O43663
1	52	3	GO:1902850	BP	microtubule cytoskeleton organization involved in mitosis	7	Q02241,Q08379,P21333
1	89	2	GO:0031109	BP	microtubule polymerization or depolymerization	7	P16949,Q08379
1	40	1	GO:0007019	BP	microtubule depolymerization	8	P16949
1	43	1	GO:0034453	BP	microtubule anchoring	7	P60953
1	26	1	GO:0008608	BP	attachment of spindle microtubules to kinetochore	8	P60953
1.09e-09	133	12	GO:0007051	BP	spindle organization	7	P27816,P43487,P35579,Q9UQE7,Q14839,P16949,P62826,Q02241,Q08379,P07437,P21333,O43663
1	10	2	GO:0051231	BP	spindle elongation	8	Q02241,O43663
4.73e-06	81	8	GO:0007052	BP	mitotic spindle organization	8	P27816,Q9UQE7,P16949,P62826,Q02241,Q08379,P21333,O43663
1	9	2	GO:0000022	BP	mitotic spindle elongation	9	Q02241,O43663
1	36	2	GO:0051293	BP	establishment of spindle localization	7	P27816,P35579
1	28	1	GO:0051294	BP	establishment of spindle orientation	8	P27816
1	92	3	GO:0007030	BP	Golgi organization	5	P60953,Q08379,P06493
1	14	2	GO:0048313	BP	Golgi inheritance	6	Q08379,P06493
1	11	1	GO:0090161	BP	Golgi ribbon formation	6	Q08379
0.713	6	2	GO:0090166	BP	Golgi disassembly	6	Q08379,P06493
1	116	3	GO:0031023	BP	microtubule organizing center organization	5	P43487,Q08379,P06493
1	108	3	GO:0051297	BP	centrosome organization	6	P43487,Q08379,P06493
1	75	2	GO:0007098	BP	centrosome cycle	7	P43487,P06493
1	10	1	GO:0051299	BP	centrosome separation	7	P43487
1	9	1	GO:0007100	BP	mitotic centrosome separation	8	P43487
2.71e-24	2476	58	GO:0022607	BP	cellular component assembly	4	Q6FI81,Q9Y3F4,P60953,Q15645,P12814,P60709,Q14247,Q13243,O94906,O75832,O60828,Q13887,Q16698,P07737,P26196,O15145,Q14839,Q9NU22,P16949,Q16181,P18846,Q13247,Q9BW27,O43707,O15143,Q9UJU6,P30154,Q02241,P61160,Q9BY44,Q8N726,P06396,Q92879,Q92621,P32320,P68032,O15511,Q96HC4,Q8N183,Q13418,Q08379,Q2NL82,Q15019,P06493,P07355,Q9UNN5,P55209,Q04828,P07437,P62937,P21333,P60903,P62805,Q06210,O60749,Q99733,Q9ULC4,…
1	18	1	GO:0031163	BP	metallo-sulfur cluster assembly	5	Q6FI81
1	18	1	GO:0016226	BP	iron-sulfur cluster assembly	6	Q6FI81
1.66e-22	1649	47	GO:0065003	BP	macromolecular complex assembly	5	Q9Y3F4,P60953,Q14247,Q13243,O94906,O75832,O60828,Q16698,P07737,P26196,O15145,Q14839,Q9NU22,P16949,Q16181,P18846,Q13247,O15143,Q9UJU6,P30154,Q02241,P61160,Q9BY44,Q8N726,P06396,Q92879,Q92621,P32320,O15511,Q8N183,Q13418,Q08379,Q2NL82,P06493,P07355,Q9UNN5,P55209,Q04828,P07437,P21333,P60903,P62805,Q06210,O60749,Q99733,Q9ULC4,P14174
5.24e-12	923	27	GO:0034622	BP	cellular macromolecular complex assembly	6	Q9Y3F4,Q14247,Q13243,O94906,O75832,O60828,P07737,P26196,O15145,Q9NU22,P16949,P18846,Q13247,O15143,P61160,Q9BY44,P06396,Q92879,Q92621,O15511,Q8N183,Q08379,Q2NL82,P55209,P62805,Q99733,Q9ULC4
1	193	3	GO:0065004	BP	protein-DNA complex assembly	7	P55209,P62805,Q99733
1	51	1	GO:0034508	BP	centromere complex assembly	8	P62805
2.61e-06	203	11	GO:0022618	BP	ribonucleoprotein complex assembly	7	Q9Y3F4,Q13243,O94906,O60828,P26196,Q9NU22,Q13247,Q9BY44,Q92879,Q2NL82,Q9ULC4
1	41	2	GO:0000387	BP	spliceosomal snRNP assembly	8	Q9Y3F4,O94906
1	12	1	GO:0000244	BP	spliceosomal tri-snRNP complex assembly	9	O94906
0.24	56	4	GO:0000245	BP	spliceosomal complex assembly	8	Q13243,O94906,Q13247,Q92879
0.586	28	3	GO:0006376	BP	mRNA splice site selection	8	Q13243,Q13247,Q92879
1	21	1	GO:0001731	BP	formation of translation preinitiation complex	8	Q9ULC4
4.39e-15	1400	36	GO:0006461	BP	protein complex assembly	6	P60953,Q14247,O75832,Q16698,P07737,O15145,Q14839,Q9NU22,P16949,Q16181,P18846,O15143,Q9UJU6,P30154,Q02241,P61160,P06396,Q92621,P32320,O15511,Q8N183,Q13418,Q08379,P06493,P07355,Q9UNN5,P55209,Q04828,P07437,P21333,P60903,P62805,Q06210,O60749,Q99733,P14174
0.00154	463	12	GO:0051259	BP	protein oligomerization	7	Q16698,Q16181,P32320,Q13418,Q08379,P07355,Q04828,P60903,P62805,Q06210,O60749,P14174
0.00409	134	7	GO:0051262	BP	protein tetramerization	8	Q16698,P32320,Q08379,P07355,P60903,P62805,Q06210
0.315	114	5	GO:0051291	BP	protein heterooligomerization	8	Q16181,Q13418,P07355,P60903,P62805
[truncated: 3,156 more rows]

## Sheet: Trn-2
Trn-2 2nd-Z-15% Cargoes (246 Proteins)
[truncated: 4,491 more rows]

[truncated: 9 more sheets: Trn-SR, Imp-4, Imp-5, Imp-7, Imp-8, Imp-9, Imp-11, Imp-13, Exp-4]
