# Supplementary material for: Extensive cargo identification reveals distinct biological roles of the 12 importin pathways
Source: eLife. 2017 Jan 24;6:e21184. doi: 10.7554/eLife.21184 (PMC5305215; doi:10.7554/eLife.21184)
Supplement: Supplementary file 9. — Each sheet shows the correspondences between the 3rd-Z-4% cargoes of one NTR and selected GO terms. A term annotation to a cargo is indicated by ‘1’ in the corresponding cell. Reported cargoes are indicated by magenta in the gene name cells, and the results of the bead halo assays (Supplementary file 2) are also indicated by colors in the gene name cells: blue, cargoes directly bound to the NTR; light blue, cargoes directly bound to Imp-α but not Imp-β; gray, proteins that did not bind to the NTR. GO terms that represent many similar terms were selected from the terms enriched significantly (p<0.05) for the 3rd-Z-4% cargoes of each NTR, and broadly defined terms were deselected. Magenta and orange in the term ID cells indicate terms that are significantly enriched for the cargoes of four or fewer NTRs, and of them magenta indicates the terms presented in Figures 5 and 6. Related GO terms are bundled in the same color, and different colors are used to distinguish the columns easily. The NTRs added in the transport reactions (white in the rank cells) were not analyzed. This table was derived from Supplementary file 7. For 2nd-Z-15% cargoes, see Supplementary file 10. DOI: http://dx.doi.org/10.7554/eLife.21184.025 [file elife-21184-supp9.xlsx]

## Sheet: Legend
Supplementary file 9
Correspondences between the 3rd-Z-4% cargoes and Gene Ontology (GO) terms
Each sheet shows the correspondences between the 3rd-Z-4% cargoes of one NTR and selected GO terms. A term annotation to a cargo is indicated by “1” in the corresponding cell. Reported cargoes are indicated by magenta in the gene name cells, and the results of the bead halo assays (Supplementary file 2) are also indicated by colors in the gene name cells: blue, cargoes directly bound to the NTR; …
Imp-β	Trn-1	Trn-2	Trn-SR	Imp-4	Imp-5
Imp-7	Imp-8	Imp-9	Imp-11	Imp-13	Exp-4
(13 sheets including this one)

## Sheet: Imp-β
GO Terms for Imp-β 3rd-Z-4% Cargoes		Term Type	BP																																									CC
		Term ID	GO:0006259	GO:0010216	GO:0006281	GO:0006284	GO:0006298	GO:0006325	GO:0016568	GO:0006338	GO:0070828	GO:0051276	GO:0032200	GO:0000723	GO:0010467	GO:0006351	GO:0006366	GO:0006368	GO:0006369	GO:0016458	GO:0031047	GO:0016070	GO:0034660	GO:0034470	GO:0006397	GO:0006370	GO:0000398	GO:0098789	GO:0051028	GO:0010608	GO:0043412	GO:0018205	GO:0006913	GO:0051168	GO:0007049	GO:0000278	GO:0000280	GO:0007067	GO:0007077	GO:0050896	GO:0006974	GO:0006950	GO:0016032	GO:0005634	GO:0005654	GO:0005730	GO:0005635	GO:0000785	GO:0005694
Rank by 3rd Z-score (Imp-β)		Term Name	DNA metabolic process	Maintenance of DNA methylation	DNA repair	Base-excision repair	Mismatch repair	Chromatin organization	Chromatin modification	Chromatin remodeling	Heterochromatin organization	Chromosome organization	Telomere organization	Telomere maintenance	Gene expression	Transcription, DNA-templated	Transcription from RNA polymerase II promoter	Transcription elongation from RNA polymerase II promoter	Termination of RNA polymerase II transcription	Gene silencing	Gene silencing by RNA	RNA metabolic process	ncRNA metabolic process	ncRNA processing	mRNA processing	7-methylguanosine mRNA capping	mRNA splicing, via spliceosome	pre-mRNA cleavage required for polyadenylation	mRNA transport	Posttranscriptional regulation of gene expression	Macromolecule modification	Peptidyl-lysine modification	Nucleocytoplasmic transport	Nuclear export	Cell cycle	Mitotic cell cycle	Nuclear division	Mitotic nuclear division	Mitotic nuclear envelope disassembly	Response to stimulus	Cellular response to DNA damage stimulus	Response to stress	Viral process	Nucleus	Nucleoplasm	Nucleolus	Nuclear envelope	Chromatin	Chromosome
	Accession	Gene Name	11	2	7	3	3	11	9	4	3	16	4	4	39	28	17	5	3	7	5	39	9	5	12	7	5	2	6	7	15	6	7	5	13	10	6	6	3	24	7	16	12	54	38	10	8	6	10
1	Q14974	KPNB1
2	O43148	RNMT													1	1	1					1			1	1					1												1	1	1	1
3	Q9BTL3	FAM103A1													1							1			1	1																		1
4	Q9BW19	KIFC1										1																							1	1	1	1		1		1		1
5	Q2NL82	TSR1																																										1		1
6	Q96AG4	LRRC59																																										1			1
7	P52298	NCBP2													1	1	1	1	1	1	1	1	1		1	1	1	1	1	1			1	1									1	1	1
8	Q09161	NCBP1													1	1	1	1	1	1	1	1	1		1	1	1	1	1	1			1	1									1	1	1
9	Q6P6C2	ALKBH5													1							1			1				1		1		1	1						1		1		1	1
10	P35658	NUP214													1					1	1	1	1	1					1	1	1	1	1	1	1	1	1	1	1	1		1	1	1	1		1
11	Q9BXP5	SRRT													1	1				1	1	1	1	1						1										1				1	1
12	Q99567	NUP88													1					1	1	1	1	1					1		1	1	1	1	1	1	1	1	1	1		1	1	1	1		1
13	P35269	GTF2F1													1	1	1	1				1			1	1	1													1			1	1	1
14	Q9NRZ9	HELLS	1	1				1	1	1	1	1			1	1				1		1									1				1	1	1	1		1				1				1	1
15	Q9BZZ5	API5																																										1	1
16	Q9HCK8	CHD8						1	1	1		1			1	1	1					1																		1				1	1
17	Q15054	POLD3	1		1	1	1					1	1	1																					1	1				1	1	1		1	1				1
18	P18754	RCC1																																	1	1	1	1					1	1	1		1	1	1
19	Q6DD87	ZNF787
20	Q9NZM1	MYOF																																						1		1		1			1
21	Q13330	MTA1	1		1			1				1			1	1						1									1	1								1	1	1		1	1		1
22	P34897	SHMT2																													1									1		1		1
23	Q86V81	ALYREF
24	P13984	GTF2F2													1	1	1	1				1			1	1	1																1	1	1
25	P49711	CTCF	1	1				1	1			1			1	1	1					1									1	1			1									1	1	1			1
26	Q86U38	NOP9
27	P17028	ZNF24													1	1						1																						1
28	P54278	PMS2	1		1		1																																	1	1	1		1	1
29	O75717	WDHD1						1			1	1			1							1																						1	1				1
30	P56270	MAZ													1	1	1		1			1																						1
31	Q86U70	LDB1						1	1			1			1	1	1					1									1	1								1				1				1	1
32	P51948	MNAT1	1		1										1	1	1	1				1			1	1					1				1	1				1	1	1	1	1	1
33	Q15072	ZNF146													1	1						1																						1		1
34	Q9ULW0	TPX2																													1				1	1	1	1						1	1
35	Q02218	OGDH
36	Q9H6F5	CCDC86																																									1	1		1
37	Q9BUI4	POLR3C													1	1						1																		1		1		1	1
38	Q9P016	THYN1																																										1		1
39	Q969G3	SMARCE1						1	1	1		1			1	1	1					1																						1	1			1	1
40	P49005	POLD2	1		1	1	1					1	1	1																					1	1				1	1	1		1	1
41	O00622	CYR61													1	1	1					1									1									1		1
42	Q9Y657	SPIN1						1	1			1			1	1						1	1												1					1				1		1
43	Q4VC31	CCDC58
44	P17096	HMGA1	1		1	1		1	1	1	1	1			1	1	1			1		1																		1	1	1	1	1	1			1	1
45	P02545	LMNA													1	1	1					1											1		1	1			1	1		1		1	1		1
46	Q9NWH9	SLTM													1	1						1																						1	1
47	O15042	U2SURP													1							1																						1	1
48	O14776	TCERG1													1	1	1					1																						1		1
49	O00541	PES1													1							1	1	1											1									1	1	1			1
50	Q8WVV9	HNRPLL													1							1			1																			1
51	P52292	KPNA2	1		1																												1							1	1	1	1	1	1		1
52	Q15651	HMGN3						1	1			1			1	1	1					1																		1				1	1			1	1
53	Q9P2N5	RBM27													1							1			1																			1	1
54	Q92945	KHSRP													1	1						1	1		1				1	1														1	1
55	Q8NBJ7	SUMF2																													1
56	O14979	HNRPDL													1	1						1																						1	1
57	Q92804	TAF15													1	1						1																						1	1
58	O60832	DKC1	1									1	1	1	1							1	1	1						1	1													1	1	1
59	Q1KMD3	HNRNPUL2																																										1	1
60	Q9NZ63	C9orf78																																										1	1
61	Q9NV56	MRGBP						1	1			1			1	1	1					1									1	1												1	1
62	Q00839	HNRNPU	1									1	1	1	1							1			1		1			1										1				1	1
63	P04181	OAT
64	P25705	ATP5A1
[truncated: 19 more columns]

## Sheet: Trn-1
GO Terms for Trn-1 3rd-Z-4% Cargoes		Term Type	BP																CC									MF
		Term ID	GO:0010467	GO:0006351	GO:0006366	GO:0006369	GO:0016070	GO:0006397	GO:0000398	GO:0000380	GO:0048255	GO:0051028	GO:0019538	GO:0010608	GO:0006913	GO:0032502	GO:0050896	GO:0010038	GO:0005634	GO:0005654	GO:0005730	GO:0016604	GO:0016607	GO:1990904	GO:0005681	GO:0071013	GO:0005737	GO:0003677	GO:0003697	GO:0098847	GO:0042162	GO:0000988	GO:0000989	GO:0003723	GO:0003727	GO:0044822	GO:0003729	GO:0003730	GO:0017091	GO:0000166
Rank by 3rd Z-score (Trn-1)		Term Name	Gene expression	Transcription, DNA-templated	Transcription from RNA polymerase II promoter	Termination of RNA polymerase II transcription	RNA metabolic process	mRNA processing	mRNA splicing, via spliceosome	Alternative mRNA splicing, via spliceosome	mRNA stabilization	mRNA transport	Protein metabolic process	Posttranscriptional regulation of gene expression	Nucleocytoplasmic transport	Developmental process	Response to stimulus	Response to metal ion	Nucleus	Nucleoplasm	Nucleolus	Nuclear body	Nuclear speck	Ribonucleoprotein complex	Spliceosomal complex	Catalytic step 2 spliceosome	Cytoplasm	DNA binding	Single-stranded DNA binding	Sequence-specific single stranded DNA binding	Telomeric DNA binding	Transcription factor activity, protein binding	Transcription factor activity, transcription factor binding	RNA binding	Single-stranded RNA binding	Poly(A) RNA binding	mRNA binding	mRNA 3'-UTR binding	AU-rich element binding	Nucleotide binding
	Accession	Gene Name	33	19	11	3	32	19	17	5	3	5	15	6	5	16	22	5	39	31	7	6	5	18	10	8	36	12	4	2	3	6	6	29	6	27	5	3	3	19	# of protein
1	P18846	ATF1	1	1	1		1						1			1	1	1	1	1								1
2	Q07666	KHDRBS1	1	1			1	1					1	1	1		1		1	1							1	1						1	1	1
3	Q9UKD2	MRTO4																	1	1	1						1							1		1
4	P52272	HNRNPM	1				1	1	1	1							1		1	1	1	1		1	1	1								1		1				1
5	Q13895	BYSL	1				1									1	1		1		1						1							1		1
6	P09651	HNRNPA1	1				1	1	1	1		1			1				1	1				1	1	1	1	1	1	1	1			1	1	1				1
7	Q99729	HNRNPAB	1	1	1		1									1			1	1				1			1							1		1	1			1
8	Q86V81	ALYREF
9	P51991	HNRNPA3	1				1	1	1			1							1	1				1	1	1	1							1		1	1			1
10	Q14103	HNRNPD	1	1			1	1	1		1		1	1		1	1	1	1	1				1			1	1			1			1		1	1	1	1	1
11	Q13151	HNRNPA0	1				1	1	1		1			1			1		1	1				1										1		1			1	1
12	Q86U42	PABPN1	1	1	1	1	1	1	1			1			1				1	1				1			1							1		1				1
13	O94992	HEXIM1	1	1	1		1						1			1	1		1	1							1							1
14	Q01844	EWSR1	1	1			1												1		1						1							1		1				1
15	P22626	HNRNPA2B1	1	1	1		1	1	1			1	1	1	1		1		1	1				1	1	1	1	1	1	1	1			1		1	1	1		1
16	O60828	PQBP1	1	1			1	1	1	1						1			1	1		1	1	1			1	1				1	1
17	Q15717	ELAVL1	1								1		1	1		1			1	1							1							1		1	1	1	1	1
18	Q6DD87	ZNF787
19	P55795	HNRNPH2	1				1	1	1										1	1				1			1							1		1				1
20	Q9BQ69	MACROD1											1				1		1								1
21	P35637	FUS	1				1	1	1								1	1	1	1				1			1	1				1	1	1		1				1
22	O00151	PDLIM1	1	1			1										1										1					1	1
23	Q9NRR5	UBQLN4											1				1		1								1
24	P56270	MAZ	1	1	1	1	1												1									1						1		1
25	P31943	HNRNPH1	1				1	1	1										1	1				1	1	1	1							1	1	1				1
26	Q9H307	PNN	1	1			1	1	1										1	1		1	1	1	1	1		1						1		1
27	P09496	CLTA														1	1										1
28	Q9NQ88	TIGAR	1	1	1		1									1	1	1	1								1
29	P52597	HNRNPF	1				1	1	1										1	1				1	1	1	1							1	1	1				1
30	P30154	PPP2R1B											1			1	1
31	O00422	SAP18	1	1	1		1	1	1	1									1	1		1	1				1					1	1	1		1
32	P16930	FAH																									1
33	Q7Z6I8	C5orf24
34	Q9ULA0	DNPEP											1						1	1							1
35	Q01780	EXOSC10	1				1												1		1						1							1		1				1
36	O14979	HNRPDL	1	1			1												1	1				1	1		1	1	1					1	1	1				1
37	P62805	HIST1H4A	1	1			1						1			1	1		1	1								1						1		1
38	Q9UQE7	SMC3											1			1	1		1	1							1													1
39	Q6P587	FAHD1																	1	1							1
40	Q96EP5	DAZAP1	1				1	1	1							1			1	1							1							1		1				1
41	P36776	LONP1											1			1	1	1	1	1							1	1	1					1	1					1
42	Q92922	SMARCC1	1	1	1		1						1			1	1		1	1												1	1
43	O00567	NOP56	1				1												1	1	1			1			1							1		1
44	P30533	LRPAP1															1										1
45	P32754	HPD																									1
46	P61326	MAGOH	1	1	1	1	1	1	1	1		1	1	1	1				1	1		1	1	1	1	1	1							1		1
47	P41223	BUD31	1	1	1		1	1	1								1		1					1	1							1	1
48	Q66PJ3	ARL6IP4	1				1	1											1	1	1	1	1											1		1
49	P25325	MPST														1	1										1

## Sheet: Trn-2
GO Terms for Trn-2 3rd-Z-4% Cargoes		Term Type	BP																					CC													MF
		Term ID	GO:0010467	GO:0006351	GO:0006366	GO:0016070	GO:0006397	GO:0000398	GO:0000380	GO:0048255	GO:0006401	GO:0000184	GO:0051028	GO:0042254	GO:0006412	GO:0006413	GO:0006415	GO:0051168	GO:0045047	GO:0006614	GO:0010033	GO:0016259	GO:0016032	GO:0005634	GO:0005730	GO:0044452	GO:0005654	GO:0016604	GO:0016607	GO:1990904	GO:0005681	GO:0071013	GO:0044391	GO:0015934	GO:0005737	GO:0044445	GO:0098847	GO:0042162	GO:0003723	GO:0003727	GO:0044822	GO:0003729	GO:0003730	GO:0017091	GO:0000166
Rank by 3rd Z-score (Trn-2)		Term Name	Gene expression	Transcription, DNA-templated	Transcription from RNA polymerase II promoter	RNA metabolic process	mRNA processing	mRNA splicing, via spliceosome	Alternative mRNA splicing, via spliceosome	mRNA stabilization	RNA catabolic process	Nuclear-transcribed mRNA catabolic process, nonsense-mediated decay	mRNA transport	Ribosome biogenesis	Translation	Translational initiation	Translational termination	Nuclear export	Protein targeting to ER	SRP-dependent cotranslational protein targeting to membrane	Response to organic substance	Selenocysteine metabolic process	Viral process	Nucleus	Nucleolus	Nucleolar part	Nucleoplasm	Nuclear body	Nuclear speck	Ribonucleoprotein complex	Spliceosomal complex	Catalytic step 2 spliceosome	Ribosomal subunit	Large ribosomal subunit	Cytoplasm	Cytosolic part	Sequence-specific single stranded DNA binding	Telomeric DNA binding	RNA binding	Single-stranded RNA binding	Poly(A) RNA binding	mRNA binding	mRNA 3'-UTR binding	AU-rich element binding	Nucleotide binding
	Accession	Gene Name	36	17	10	35	22	19	4	3	5	4	4	5	8	5	4	4	4	4	11	4	8	40	9	3	30	7	6	24	11	8	4	4	35	4	2	3	33	4	32	5	3	3	25	# of proteins
1	P18846	ATF1	1	1	1	1															1			1			1
2	P13804	ETFA																																	1										1
3	Q07666	KHDRBS1	1	1		1	1								1	1		1						1			1								1				1	1	1
4	P52272	HNRNPM	1			1	1	1	1												1			1	1		1	1		1	1	1							1		1				1
5	Q9UKD2	MRTO4												1										1	1		1								1				1		1
6	P09651	HNRNPA1	1			1	1	1	1				1					1					1	1			1			1	1	1			1		1	1	1	1	1				1
7	P51991	HNRNPA3	1			1	1	1					1											1			1			1	1	1			1				1		1	1			1
8	Q13151	HNRNPA0	1			1	1	1		1											1			1			1			1									1		1			1	1
9	Q86V81	ALYREF
10	Q99729	HNRNPAB	1	1	1	1																		1			1			1					1				1		1	1			1
11	Q86U42	PABPN1	1	1	1	1	1	1					1					1					1	1			1			1					1				1		1				1
12	Q14103	HNRNPD	1	1		1	1	1		1	1				1						1			1			1			1					1			1	1		1	1	1	1	1
13	Q01844	EWSR1	1	1		1																		1	1										1				1		1				1
14	Q16698	DECR1																						1			1								1										1
15	P22626	HNRNPA2B1	1	1	1	1	1	1					1		1			1			1			1			1			1	1	1			1		1	1	1		1	1	1		1
16	P17480	UBTF	1	1		1																		1	1	1	1												1		1
17	P55795	HNRNPH2	1			1	1	1																1			1			1					1				1		1				1
18	P35637	FUS	1			1	1	1																1			1			1					1				1		1				1
19	O94992	HEXIM1	1	1	1	1																		1			1								1				1
20	O60828	PQBP1	1	1		1	1	1	1															1			1	1	1	1					1
21	Q15717	ELAVL1	1							1					1									1			1								1				1		1	1	1	1	1
22	O00567	NOP56	1			1								1										1	1	1	1			1					1				1		1
23	P31943	HNRNPH1	1			1	1	1																1			1			1	1	1			1				1	1	1				1
24	Q6PD62	CTR9	1	1	1	1	1														1			1			1	1	1
25	P16615	ATP2A2																			1														1										1
26	O94906	PRPF6	1	1	1	1	1	1																1			1	1	1	1	1	1							1		1
27	Q9Y5J1	UTP18	1			1								1										1	1	1				1									1		1
28	P52597	HNRNPF	1			1	1	1																1			1			1	1	1			1				1	1	1				1
29	P07741	APRT																			1			1			1								1										1
30	Q66PJ3	ARL6IP4	1			1	1																	1	1		1	1	1										1		1
31	Q53GS9	USP39	1			1	1	1																1			1			1	1
32	Q7Z6I8	C5orf24
33	P56270	MAZ	1	1	1	1																		1															1		1
34	O00422	SAP18	1	1	1	1	1	1	1															1			1	1	1						1				1		1
35	P41223	BUD31	1	1	1	1	1	1																1						1	1
36	Q96EP5	DAZAP1	1			1	1	1																1			1								1				1		1				1
37	P62910	RPL32	1			1					1	1			1	1	1		1	1		1	1							1			1	1	1	1			1		1
38	P35268	RPL22	1			1					1	1			1	1	1		1	1		1	1	1						1			1	1	1	1			1		1
39	Q6DD88	ATL3																																	1										1
40	P51151	RAB9A																																	1										1
41	P51149	RAB7A																			1		1												1										1
42	Q53H82	LACTB2																																	1
43	O60716	CTNND1	1	1		1																		1											1
44	Q15942	ZYX																			1		1	1											1				1		1
45	P48634	PRRC2A																						1											1				1		1
46	P31942	HNRNPH3	1			1	1	1																1			1			1	1								1		1				1
47	P62913	RPL11	1			1					1	1		1	1	1	1		1	1		1	1	1	1					1			1	1	1	1			1		1
48	P62750	RPL23A	1			1					1	1		1	1	1	1		1	1		1	1	1	1					1			1	1	1	1			1		1				1
49	Q9H307	PNN	1	1		1	1	1																1			1	1	1	1	1	1							1		1
50	O60488	ACSL4																			1														1										1

## Sheet: Trn-SR
GO Terms for Trn-SR 3rd-Z-4% Cargoes		Term Type	BP																																									CC
		Term ID	GO:0051276	GO:0010467	GO:0006351	GO:0006366	GO:0006369	GO:0016070	GO:0006397	GO:0000398	GO:0000380	GO:0031124	GO:0006378	GO:0010501	GO:0051028	GO:0042254	GO:0006364	GO:0010608	GO:0006457	GO:0043412	GO:0036211	GO:0030163	GO:0016567	GO:0006511	GO:0031145	GO:0006913	GO:0051168	GO:0007049	GO:0000278	GO:0051301	GO:0000075	GO:0071173	GO:0044770	GO:0007091	GO:0000280	GO:0007067	GO:0051304	GO:0007059	GO:0050896	GO:0006950	GO:0010033	GO:0007165	GO:0007154	GO:0005634	GO:0005654	GO:0005730	GO:0016604	GO:0016607	GO:0015030
Rank by 3rd Z-score (Trn-SR)		Term Name	Chromosome organization	Gene expression	Transcription, DNA-templated	Transcription from RNA polymerase II promoter	Termination of RNA polymerase II transcription	RNA metabolic process	mRNA processing	mRNA splicing, via spliceosome	Alternative mRNA splicing, via spliceosome	mRNA 3'-end processing	mRNA polyadenylation	RNA secondary structure unwinding	mRNA transport	Ribosome biogenesis	rRNA processing	Posttranscriptional regulation of gene expression	Protein folding	Macromolecule modification	Protein modification process	Protein catabolic process	Protein ubiquitination	Ubiquitin-dependent protein catabolic process	Anaphase-promoting complex-dependent proteasomal ubiquitin-dependent protein catabolic process	Nucleocytoplasmic transport	Nuclear export	Cell cycle	Mitotic cell cycle	Cell division	Cell cycle checkpoint	Spindle assembly checkpoint	Cell cycle phase transition	Metaphase/anaphase transition of mitotic cell cycle	Nuclear division	Mitotic nuclear division	Chromosome separation	Chromosome segregation	Response to stimulus	Response to stress	Response to organic substance	Signal transduction	Cell communication	Nucleus	Nucleoplasm	Nucleolus	Nuclear body	Nuclear speck	Cajal body
	Accession	Gene Name	12	41	27	19	9	38	20	14	6	12	3	3	8	6	5	6	5	18	16	8	7	7	5	8	8	11	8	8	6	4	7	4	7	7	4	5	29	16	13	19	20	50	40	14	10	8	4
1	Q9UQ35	SRRM2		1				1	1	1																																		1	1		1	1	1
2	Q12931	TRAP1		1														1	1																				1	1		1	1	1	1
3	Q8IWS0	PHF6		1	1			1																																				1	1	1
4	Q13247	SRSF6		1	1	1	1	1	1	1	1	1			1											1	1												1	1				1	1		1	1
5	Q9BRL6	SRSF8		1				1	1																																			1
6	P53350	PLK1	1	1	1	1		1												1	1	1	1	1	1			1	1	1	1	1	1	1	1	1	1	1	1	1		1	1	1	1	1
7	O00461	GOLIM4																																										1	1
8	O00170	AIP		1				1											1																				1			1	1	1	1
9	Q16629	SRSF7		1	1	1	1	1	1	1		1			1											1	1																	1	1
10	Q9H9A5	CNOT10		1	1			1										1																										1
11	Q01130	SRSF2		1	1	1	1	1	1	1	1	1			1											1	1																	1	1		1	1
12	Q9Y2X9	ZNF281		1	1	1		1																																				1	1
13	Q7L2E3	DHX30		1				1								1
14	Q9UPT8	ZC3H4
15	Q9Y305	ACOT9
16	Q9Y6G9	DYNC1LI1	1																	1	1	1	1	1	1			1	1	1	1	1	1	1	1	1	1	1						1	1
17	O75044	SRGAP2
18	Q07955	SRSF1		1	1	1	1	1	1	1	1	1			1											1	1																	1	1		1	1
19	O60568	PLOD3																		1	1																		1		1
20	P53999	SUB1		1	1	1		1																															1			1	1	1		1
21	Q8N7H5	PAF1	1	1	1	1		1	1			1	1							1	1		1																1		1	1	1	1	1
22	Q3KQU3	MAP7D1
23	O00422	SAP18	1	1	1	1		1	1	1	1																																	1	1		1	1
24	Q8ND56	LSM14A		1														1																					1	1	1	1	1
25	P18615	NELFE	1	1	1	1		1	1			1	1							1	1																		1			1	1	1	1
26	Q9Y5K6	CD2AP																				1		1				1	1	1					1	1			1			1	1	1		1
27	Q9NZ63	C9orf78																																										1	1
28	Q9NWH9	SLTM		1	1			1																																				1	1
29	P83916	CBX1		1	1			1																																				1	1
30	Q9GZL7	WDR12		1				1								1	1																						1			1	1	1	1	1
31	Q69YN2	CWF19L1
32	Q9UJU6	DBNL																		1	1																		1	1		1	1
33	P25685	DNAJB1																	1																				1	1	1			1	1	1
34	Q9NTZ6	RBM12																																										1	1
35	P33981	TTK	1																	1	1	1	1	1	1			1	1	1	1	1	1	1	1	1	1	1	1			1	1
36	Q9H0A0	NAT10	1	1				1								1	1																											1		1
37	Q92620	DHX38		1	1	1	1	1	1	1		1			1											1	1																	1	1
38	Q5T4S7	UBR4																		1	1	1	1	1																				1	1
39	Q9H2U1	DHX36	1	1	1	1		1						1																									1	1	1			1
40	O60832	DKC1	1	1				1								1	1	1		1																								1	1	1	1		1
41	Q9H0C8	ILKAP																		1	1																		1			1	1
42	P14635	CCNB1	1	1				1	1			1								1	1	1	1	1	1			1	1	1	1	1	1	1	1	1	1	1	1	1	1			1	1
43	P51812	RPS6KA3		1	1	1		1										1		1	1							1											1	1	1	1	1	1	1
44	Q6P1N9	TATDN1																																										1	1
45	P84103	SRSF3		1	1	1	1	1	1	1		1			1											1	1																	1	1
46	O60828	PQBP1		1	1			1	1	1	1																																	1	1		1	1
47	P24941	CDK2	1	1	1			1												1	1	1	1	1	1			1	1	1	1		1		1	1			1	1	1	1	1	1	1		1		1
48	Q9NR30	DDX21		1	1	1		1						1		1	1																						1		1			1	1	1
49	Q05048	CSTF1		1	1	1	1	1	1	1		1	1																															1	1
50	O43143	DHX15		1				1	1																														1		1			1		1
51	P29372	MPG																		1																			1	1				1	1
52	Q9UDY4	DNAJB4																	1																				1	1	1			1	1
53	Q96ES7	CCDC101	1	1	1			1												1	1																							1	1
54	Q96FV9	THOC1		1	1			1	1						1											1	1	1			1								1	1		1	1	1	1		1	1
55	P62136	PPP1CA		1														1		1	1							1		1									1	1	1	1	1	1	1	1
56	Q9BY42	RTFDC1
57	Q9H4H8	FAM83D																		1	1	1						1	1	1			1		1	1		1	1			1	1
58	P17844	DDX5		1	1	1		1	1	1	1			1																									1	1		1	1	1	1	1
59	Q9Y3C6	PPIL1		1				1	1	1									1	1	1																							1
60	Q9UNX4	WDR3		1				1								1	1																											1		1
61	Q8N684	CPSF7		1	1	1	1	1	1	1		1																																1	1
62	P61006	RAB8A																										1	1				1						1		1	1	1	1		1
63	Q01081	U2AF1		1	1	1	1	1	1	1		1			1											1	1												1	1			1	1	1		1	1	1
[truncated: 29 more columns]

## Sheet: Imp-4
GO Terms for Imp-4 3rd-Z-4% Cargoes		Term Type	BP																															CC								MF
		Term ID	GO:0006259	GO:0006310	GO:0071103	GO:0006323	GO:0032392	GO:0006265	GO:0000737	GO:0006281	GO:0006289	GO:0031497	GO:0051276	GO:0010467	GO:0006351	GO:0016070	GO:0006397	GO:0000398	GO:0019538	GO:0022402	GO:0000278	GO:0048869	GO:0008219	GO:0012501	GO:0030262	GO:0006309	GO:0050896	GO:0006974	GO:0006950	GO:0002376	GO:0032606	GO:0006826	GO:0006897	GO:0005634	GO:0005654	GO:0005730	GO:0000785	GO:0005694	GO:0000793	GO:0005737	GO:0005829	GO:0003677	GO:0008301	GO:0043566	GO:0000217	GO:0097100	GO:0000400	GO:0003723	GO:0044822
Rank by 3rd Z-score (Imp-4)		Term Name	DNA metabolic process	DNA recombination	DNA conformation change	DNA packaging	DNA geometric change	DNA topological change	DNA catabolic process, endonucleolytic	DNA repair	Nucleotide-excision repair	Chromatin assembly	Chromosome organization	Gene expression	Transcription, DNA-templated	RNA metabolic process	mRNA processing	mRNA splicing, via spliceosome	Protein metabolic process	Cell cycle process	Mitotic cell cycle	Cellular developmental process	Cell death	Programmed cell death	Apoptotic nuclear changes	Apoptotic DNA fragmentation	Response to stimulus	Cellular response to DNA damage stimulus	Response to stress	Immune system process	Type I interferon production	Iron ion transport	Endocytosis	Nucleus	Nucleoplasm	Nucleolus	Chromatin	Chromosome	Condensed chromosome	Cytoplasm	Cytosol	DNA binding	DNA binding, bending	Structure-specific DNA binding	DNA secondary structure binding	Supercoiled DNA binding	Four-way junction DNA binding	RNA binding	Poly(A) RNA binding
	Accession	Gene Name	8	5	6	4	4	2	3	6	4	4	11	21	14	18	9	8	17	8	7	13	11	9	3	3	24	9	16	12	4	3	6	32	21	9	7	10	4	30	12	14	3	4	3	2	3	21	21
1	Q8TEX9	IPO4
2	P17858	PFKL																									1													1	1
3	Q14692	BMS1																																1		1												1	1
4	P02786	TFRC																				1					1		1	1		1	1							1								1	1
5	P55081	MFAP1																																														1	1
6	P05187	ALPP
7	Q96AY3	FKBP10																	1																					1
8	P18615	NELFE											1	1	1	1	1		1								1							1	1													1	1
9	P38159	RBMX												1	1	1	1	1	1			1					1							1	1		1	1				1						1	1
10	P23246	SFPQ	1	1						1			1	1	1	1	1	1	1	1			1	1			1	1	1					1	1		1	1		1		1						1	1
11	O43852	CALU																				1					1		1											1
12	Q9NWH9	SLTM												1	1	1							1	1										1	1													1	1
13	Q9BSJ8	ESYT1																																						1
14	Q1KMD3	HNRNPUL2																																1	1													1	1
15	P53350	PLK1											1	1	1	1			1	1	1		1	1			1	1	1					1	1	1	1	1	1	1	1
16	Q8NFW8	CMAS																	1															1	1					1	1
17	Q13492	PICALM												1	1	1			1			1	1							1		1	1	1						1
18	P18754	RCC1																		1	1													1	1		1	1	1	1		1		1
19	Q92733	PRCC																		1	1													1
20	Q9NYF8	BCLAF1												1	1	1							1	1			1	1	1					1	1	1				1		1						1	1
21	Q9H2H8	PPIL3												1		1	1	1	1															1
22	P38646	HSPA9																	1				1	1			1							1		1				1								1	1
23	Q08211	DHX9			1		1						1	1		1	1	1				1					1		1	1	1			1	1	1				1	1	1						1	1
24	P09429	HMGB1	1	1	1	1	1	1	1	1	1	1	1	1	1	1			1			1	1	1	1	1	1	1	1	1	1		1	1	1			1	1	1	1	1	1	1	1	1	1	1	1
25	P02794	FTH1																					1				1			1		1	1	1						1	1
26	P51149	RAB7A																	1								1		1	1			1							1
27	Q5T1J5	CHCHD2P9
28	O75937	DNAJC8												1		1	1	1																1	1					1
29	Q969Q0	RPL36AL												1					1																					1	1
30	P34897	SHMT2																	1								1		1	1				1						1
31	Q96CN7	ISOC1																																						1
32	Q14202	ZMYM3																				1												1								1
33	Q92522	H1FX			1	1						1	1																					1		1	1	1				1						1	1
34	P00505	GOT2																									1													1								1	1
35	O60306	AQR	1							1	1			1		1	1	1									1	1	1					1	1													1	1
36	Q96EK5	KIF1BP																				1																		1
37	P13984	GTF2F2												1	1	1	1	1																1	1							1
38	Q5JVF3	PCID2											1	1	1	1			1	1	1	1	1	1						1
39	Q8WVM8	SCFD1																	1			1					1		1				1							1	1
40	Q99541	PLIN2																									1							1						1	1
41	Q8N726	CDKN2A	1		1	1			1			1	1	1	1	1			1	1	1	1	1	1	1	1	1	1	1	1				1	1	1	1	1		1	1	1						1	1
42	Q69YN2	CWF19L1
43	O15347	HMGB3	1	1	1		1						1	1	1	1						1					1		1	1				1				1		1		1	1	1	1		1	1	1
44	P43243	MATR3												1																				1	1													1	1
45	P47813	EIF1AX												1					1																					1	1							1	1
46	P26583	HMGB2	1	1	1	1	1	1	1	1		1	1	1	1	1						1	1	1	1	1	1	1	1	1	1			1	1	1	1	1	1	1		1	1	1	1	1	1	1	1
47	P62875	POLR2L	1							1	1			1	1	1	1	1									1	1	1	1	1			1	1	1				1	1	1
48	P40937	RFC5	1	1						1	1		1							1	1						1	1	1					1	1			1
49	O43823	AKAP8																		1	1						1							1	1					1		1						1	1
50	Q92917	GPKOW																																1	1
[truncated: 3 more columns]

## Sheet: Imp-5
GO Terms for Imp-5 3rd-Z-4% Cargoes		Term Type	BP															CC											MF
		Term ID	GO:0010467	GO:0006351	GO:0006366	GO:0006369	GO:0016070	GO:0034660	GO:0006397	GO:0000398	GO:0031124	GO:0010501	GO:0051028	GO:0006364	GO:0006913	GO:0051168	GO:0050896	GO:0005634	GO:0005654	GO:0005730	GO:0016604	GO:0016607	GO:0015030	GO:1990904	GO:0005681	GO:0005684	GO:0089701	GO:0005737	GO:0003677	GO:0003723	GO:0044822	GO:0000166	GO:0043169	GO:0043168
Rank by 3rd Z-score (Imp-5)		Term Name	Gene expression	Transcription, DNA-templated	Transcription from RNA polymerase II promoter	Termination of RNA polymerase II transcription	RNA metabolic process	ncRNA metabolic process	mRNA processing	mRNA splicing, via spliceosome	mRNA 3'-end processing	RNA secondary structure unwinding	mRNA transport	rRNA processing	Nucleocytoplasmic transport	Nuclear export	Response to stimulus	Nucleus	Nucleoplasm	Nucleolus	Nuclear body	Nuclear speck	Cajal body	Ribonucleoprotein complex	Spliceosomal complex	U2-type spliceosomal complex	U2AF	Cytoplasm	DNA binding	RNA binding	Poly(A) RNA binding	Nucleotide binding	Cation binding	Anion binding
	Accession	Gene Name	40	19	12	6	36	6	20	13	5	3	5	4	7	7	23	41	26	13	10	8	4	14	7	3	2	37	12	35	34	24	15	17	# of proteins
1	O00410	IPO5
2	P23511	NFYA	1	1	1		1											1	1										1
3	Q9NY93	DDX56	1				1	1				1		1				1		1										1	1	1		1
4	P52789	HK2															1											1				1		1
5	Q53FA7	TP53I3																														1	1	1
6	Q14137	BOP1	1				1	1						1				1	1	1				1				1		1	1
7	Q96FV9	THOC1	1	1			1		1				1		1	1	1	1	1		1	1						1	1	1
8	Q9Y657	SPIN1	1	1			1	1									1	1		1
9	P22087	FBL	1				1	1						1				1	1	1	1		1	1						1	1
10	Q7Z6I8	C5orf24
11	Q9NTI5	PDS5B																1	1									1	1			1		1
12	Q14498	RBM39	1	1			1		1									1	1		1	1								1	1	1
13	Q8ND56	LSM14A	1														1							1				1	1	1	1
14	Q9UHY7	ENOPH1																1										1					1
15	Q9BTC0	DIDO1	1	1			1										1	1										1		1	1		1
16	Q9Y5S2	CDC42BPB															1											1				1	1	1
17	Q9H0D6	XRN2	1	1			1		1									1		1									1	1	1		1
18	Q01081	U2AF1	1	1	1	1	1		1	1	1		1		1	1	1	1	1		1	1	1	1	1		1			1	1	1	1
19	Q3KQU3	MAP7D1																										1
20	Q9Y5X3	SNX5																										1						1
21	P35659	DEK	1	1	1		1										1	1	1									1	1	1	1
22	Q8IY67	RAVER1	1				1		1	1								1										1		1	1	1
23	P55081	MFAP1																												1	1
24	P49411	TUFM	1																									1		1	1	1		1
25	Q4G0N4	NADKD1																										1				1		1
26	Q8N684	CPSF7	1	1	1	1	1		1	1	1							1	1											1	1	1
27	P18031	PTPN1															1											1		1	1		1
28	Q04446	GBE1																										1					1
29	P62879	GNB2															1											1
30	P16070	CD44	1														1											1
31	Q8IWS0	PHF6	1	1			1											1	1	1									1	1	1		1
32	Q9UBB5	MBD2	1	1	1		1										1	1	1									1	1	1	1	1
33	Q7L014	DDX46	1				1		1	1		1						1	1		1	1	1							1	1	1		1
34	Q15072	ZNF146	1	1			1											1		1								1	1				1	1
35	Q9UMY4	SNX12	1																									1						1
36	Q9NY12	GAR1	1				1	1						1				1	1	1	1		1	1						1	1
37	Q9NQ29	LUC7L	1				1		1	1								1						1	1	1				1	1
38	Q8WVK2	SNRNP27	1				1		1	1								1	1					1	1
39	P26368	U2AF2	1	1	1	1	1		1	1	1		1		1	1	1	1	1		1	1		1	1	1	1			1	1	1
40	P56270	MAZ	1	1	1	1	1											1											1	1	1		1
41	O60568	PLOD3															1											1					1	1
42	Q16629	SRSF7	1	1	1	1	1		1	1	1		1		1	1		1	1									1		1	1	1	1
43	P38646	HSPA9													1	1	1	1		1								1		1	1	1		1
44	Q96CN7	ISOC1																										1
45	P84103	SRSF3	1	1	1	1	1		1	1	1		1		1	1		1	1									1		1	1	1
46	Q13636	RAB31															1											1				1		1
47	P31040	SDHA																										1				1		1
48	Q9BRL6	SRSF8	1				1		1									1												1	1	1
49	O43660	PLRG1	1				1		1	1								1	1	1	1	1		1	1
50	Q9H1E3	NUCKS1	1	1	1		1										1	1										1		1	1
51	Q92841	DDX17	1	1	1		1					1					1	1	1	1										1	1	1		1
52	Q9Y383	LUC7L2	1				1		1	1								1	1		1	1		1	1	1				1	1
53	Q13151	HNRNPA0	1				1		1	1							1	1	1					1						1	1	1
54	Q9NZ32	ACTR10																										1
55	P35268	RPL22	1				1											1						1				1		1	1			1
56	Q66PJ3	ARL6IP4	1				1		1									1	1	1	1	1								1	1
57	O95155	UBE4B															1	1										1
58	Q99541	PLIN2															1	1										1
59	P14866	HNRNPL	1				1		1	1								1	1					1				1	1	1	1	1
60	O43663	PRC1															1	1	1									1
61	O75182	SIN3B	1	1	1		1											1	1									1
62	Q5T8P6	RBM26	1				1		1																					1	1	1	1
63	P55265	ADAR	1				1	1	1						1	1	1	1	1	1				1	1			1	1	1	1		1

## Sheet: Imp-7
GO Terms for Imp-7 3rd-Z-4% Cargoes		Term Type	BP																																														CC
		Term ID	GO:0006310	GO:0016444	GO:0071103	GO:0006323	GO:0031497	GO:0051276	GO:0010467	GO:0006351	GO:0006366	GO:0006369	GO:0016070	GO:0006397	GO:0000398	GO:0006376	GO:0000245	GO:0000387	GO:0031124	GO:0000389	GO:0051028	GO:0019538	GO:0061077	GO:0051168	GO:0032502	GO:0048856	GO:0008219	GO:0012501	GO:0097194	GO:0030262	GO:0050896	GO:0009605	GO:0009607	GO:0006986	GO:0006950	GO:0042221	GO:0010033	GO:1901700	GO:0006952	GO:0002424	GO:0042116	GO:0002562	GO:0032606	GO:0032615	GO:0007165	GO:0007154	GO:0042592	GO:0042760	GO:0005634
Rank by 3rd Z-score (Imp-7)		Term Name	DNA recombination	Somatic cell DNA recombination	DNA conformation change	DNA packaging	Chromatin assembly	Chromosome organization	Gene expression	Transcription, DNA-templated	Transcription from RNA polymerase II promoter	Termination of RNA polymerase II transcription	RNA metabolic process	mRNA processing	mRNA splicing, via spliceosome	mRNA splice site selection	Spliceosomal complex assembly	Spliceosomal snRNP assembly	mRNA 3'-end processing	mRNA 3'-splice site recognition	mRNA transport	Protein metabolic process	Chaperone-mediated protein folding	Nuclear export	Developmental process	Anatomical structure development	Cell death	Programmed cell death	Execution phase of apoptosis	Apoptotic nuclear changes	Response to stimulus	Response to external stimulus	Response to biotic stimulus	Response to unfolded protein	Response to stress	Response to chemical	Response to organic substance	Response to oxygen-containing compound	Defense response	T cell mediated immune response to tumor cell	Macrophage activation	Somatic diversification of immune receptors via germline recombination within a single locus	Type I interferon production	Interleukin-12 production	Signal transduction	Cell communication	Homeostatic process	Very long-chain fatty acid catabolic process	Nucleus
	Accession	Gene Name	5	3	6	5	4	8	42	21	12	7	35	23	21	5	7	3	6	3	6	19	3	5	18	17	11	11	4	3	26	11	8	4	19	15	13	10	10	2	3	3	4	3	17	18	9	2	41
1	Q12931	TRAP1							1													1	1				1	1			1				1	1		1							1	1			1
2	Q6DD87	ZNF787
3	Q9BS26	ERP44																				1									1			1	1	1	1										1
4	P26583	HMGB2	1	1	1	1	1	1	1	1	1		1												1	1	1	1	1	1	1	1	1		1	1	1	1	1			1	1		1	1	1		1
5	P62805	HIST1H4A	1		1	1	1	1	1	1			1									1			1	1					1				1										1	1	1		1
6	Q9BUJ2	HNRNPUL1							1	1			1	1	1																1	1	1																1
7	O43670	ZNF207						1	1	1			1									1																											1
8	P49748	ACADVL																				1			1	1					1			1	1	1	1								1	1	1	1	1
9	O43684	BUB3						1														1									1														1	1			1
10	P08670	VIM							1																1	1	1	1	1		1														1	1
11	O75694	NUP155							1				1								1	1		1							1				1	1	1								1	1			1
12	Q9BTC0	DIDO1							1	1			1														1	1			1														1	1			1
13	O15347	HMGB3	1		1			1	1	1			1												1						1				1				1										1
14	Q96AY3	FKBP10																				1	1
15	Q15072	ZNF146							1	1			1																																				1
16	P00505	GOT2																													1					1	1	1
17	P17028	ZNF24							1	1			1												1	1																							1
18	P31040	SDHA																							1	1
19	P34897	SHMT2																				1									1				1	1	1		1										1
20	Q92522	H1FX			1	1	1	1																																									1
21	Q07955	SRSF1							1	1	1	1	1	1	1	1	1		1		1			1	1	1																							1
22	Q01130	SRSF2							1	1	1	1	1	1	1				1		1			1																									1
23	O95232	LUC7L3							1				1	1	1	1	1																																1
24	P55809	OXCT1																							1	1					1	1			1	1	1	1								1	1
25	Q16629	SRSF7							1	1	1	1	1	1	1				1		1			1																									1
26	O94906	PRPF6							1	1	1		1	1	1		1	1																															1
27	P51114	FXR1							1													1			1	1	1	1																					1
28	Q7L4I2	RSRC2
29	P56270	MAZ							1	1	1	1	1																																				1
30	Q9BWJ5	SF3B5							1				1	1	1																																		1
31	P49411	TUFM							1													1
32	Q99459	CDC5L							1	1			1	1	1																1				1	1	1	1							1	1			1
33	Q9UKV3	ACIN1			1	1		1	1				1	1	1										1	1	1	1	1	1	1	1	1		1				1								1		1
34	Q05519	SRSF11							1	1	1	1	1	1	1				1		1			1																									1
35	P09661	SNRPA1							1				1	1	1																																		1
36	Q66PJ3	ARL6IP4							1				1	1																																			1
37	P08579	SNRPB2							1				1	1	1																1	1	1		1				1										1
38	Q9NYV4	CDK12							1	1	1		1	1								1									1														1	1			1
39	P10809	HSPD1	1	1					1													1	1		1	1	1	1			1	1	1	1	1	1	1	1	1	1	1	1	1	1	1	1
40	Q15459	SF3A1							1				1	1	1	1	1			1																													1
41	O14975	SLC27A2																																														1
42	P09429	HMGB1	1	1	1	1	1	1	1	1	1		1									1			1	1	1	1	1	1	1	1	1		1	1			1	1	1	1	1	1	1	1	1		1
43	Q9NWB6	ARGLU1							1	1			1																																				1
44	Q13636	RAB31																													1					1	1	1							1	1
45	P04843	RPN1							1													1
46	P62873	GNB1																							1	1	1	1			1	1			1	1	1	1							1	1	1
47	Q16666	IFI16							1	1	1		1									1			1	1	1	1			1	1	1		1				1				1		1	1			1
48	P09012	SNRPA							1				1	1	1																																		1
49	P51991	HNRNPA3							1				1	1	1						1																												1
50	Q15428	SF3A2							1				1	1	1	1	1			1					1	1																							1
51	Q13435	SF3B2							1				1	1	1																																		1
52	Q13423	NNT																																													1
53	P62318	SNRPD3							1	1	1	1	1	1	1		1	1	1			1																											1
54	P61224	RAP1B																							1	1					1				1	1	1	1							1	1
55	Q15427	SF3B4							1				1	1	1																																		1
56	P07996	THBS1							1													1			1	1	1	1			1	1		1	1	1	1	1	1		1			1	1	1
57	Q12874	SF3A3							1				1	1	1	1	1			1																													1
58	P14678	SNRPB							1	1	1	1	1	1	1			1	1			1									1	1	1		1				1										1
[truncated: 32 more columns]

## Sheet: Imp-8
GO Terms for Imp-8 3rd-Z-4% Cargoes		Term Type	BP																																				CC
		Term ID	GO:0010467	GO:0006351	GO:0006366	GO:0006369	GO:0016070	GO:0006397	GO:0000398	GO:0031124	GO:0010501	GO:0051028	GO:0019538	GO:0006412	GO:0006413	GO:0010608	GO:0051168	GO:0016197	GO:0048193	GO:0032502	GO:0048856	GO:0048731	GO:0048869	GO:0030154	GO:0050896	GO:0009605	GO:0006950	GO:0042221	GO:0010033	GO:1901698	GO:0002376	GO:0007165	GO:0007264	GO:0007154	GO:0006914	GO:0006897	GO:0046903	GO:0016032	GO:0005634	GO:0005654	GO:0005730	GO:0016604	GO:0016607	GO:1990904	GO:0005681	GO:0097525	GO:0005684	GO:0071004	GO:0089701
Rank by 3rd Z-score (Imp-8)		Term Name	Gene expression	Transcription, DNA-templated	Transcription from RNA polymerase II promoter	Termination of RNA polymerase II transcription	RNA metabolic process	mRNA processing	mRNA splicing, via spliceosome	mRNA 3'-end processing	RNA secondary structure unwinding	mRNA transport	Protein metabolic process	Translation	Translational initiation	Posttranscriptional regulation of gene expression	Nuclear export	Endosomal transport	Golgi vesicle transport	Developmental process	Anatomical structure development	System development	Cellular developmental process	Cell differentiation	Response to stimulus	Response to external stimulus	Response to stress	Response to chemical	Response to organic substance	Response to nitrogen compound	Immune system process	Signal transduction	Small GTPase mediated signal transduction	Cell communication	Autophagy	Endocytosis	Secretion	Viral process	Nucleus	Nucleoplasm	Nucleolus	Nuclear body	Nuclear speck	Ribonucleoprotein complex	Spliceosomal complex	Spliceosomal snRNP complex	U2-type spliceosomal complex	U2-type prespliceosome	U2AF
	Accession	Gene Name	37	15	11	7	29	15	15	6	3	6	18	10	5	6	5	5	8	23	22	15	18	17	31	14	15	17	15	8	13	21	11	23	6	7	9	11	39	26	9	7	6	17	8	3	3	3	2
1	Q6DD87	ZNF787
2	P02786	TFRC																		1	1	1	1	1	1	1	1	1	1		1					1		1
3	P10809	HSPD1	1										1							1	1	1			1	1	1	1	1	1	1	1		1				1
4	O00567	NOP56	1				1																																1	1	1			1
5	Q9UKM9	RALY	1				1	1	1																														1					1	1
6	P56270	MAZ	1	1	1	1	1																																1
7	P62913	RPL11	1				1						1	1	1																							1	1		1			1
8	P35268	RPL22	1				1						1	1	1					1	1	1	1	1							1							1	1					1
9	P00505	GOT2																							1			1	1
10	P62805	HIST1H4A	1	1			1						1							1	1	1	1	1	1		1				1	1	1	1					1	1
11	P53007	SLC25A1	1										1	1																									1
12	P17028	ZNF24	1	1			1													1	1	1																	1
13	Q13423	NNT
14	Q9NVT9	ARMC1
15	P61106	RAB14																1	1	1	1				1	1	1	1	1			1	1	1		1	1
16	Q9NR30	DDX21	1	1	1		1				1									1			1	1	1	1		1	1	1									1	1	1
17	P62820	RAB1A											1						1	1	1		1	1	1	1	1					1	1	1	1	1	1	1
18	P98179	RBM3	1				1						1	1		1									1		1	1	1	1									1	1	1
19	P23511	NFYA	1	1	1		1													1	1		1	1															1	1
20	P61019	RAB2A																							1							1	1	1					1
21	Q96L92	SNX27																1							1			1			1	1		1					1	1
22	P61006	RAB8A																	1	1	1	1	1	1	1			1	1	1		1	1	1			1		1		1
23	Q96AY3	FKBP10											1
24	P09382	LGALS1																		1	1	1	1	1	1		1	1	1		1	1		1				1	1
25	Q9UL25	RAB21																1		1	1	1	1	1	1							1	1	1		1	1
26	P34897	SHMT2											1												1		1	1	1		1								1
27	Q9H4A6	GOLPH3	1										1						1						1						1	1		1			1		1	1
28	O00571	DDX3X	1	1	1		1				1		1	1	1	1									1	1	1	1			1	1		1				1	1	1		1	1	1
29	Q9H0U4	RAB1B											1						1						1	1	1					1	1	1	1			1
30	P61026	RAB10																1	1	1	1	1	1	1	1			1	1	1	1	1	1	1
31	P19367	HK1
32	P07996	THBS1	1										1	1		1				1	1	1			1	1	1	1	1	1	1	1		1		1	1
33	Q8IX12	CCAR1	1	1			1	1	1																														1	1
34	O95232	LUC7L3	1				1	1	1																														1	1		1	1	1	1	1	1	1
35	Q01081	U2AF1	1	1	1	1	1	1	1	1		1					1								1	1	1							1	1				1	1		1	1	1	1				1
36	P08670	VIM	1																	1	1	1	1	1	1							1		1				1
37	O43809	NUDT21	1	1	1	1	1	1	1	1																													1	1		1
38	Q9UKV3	ACIN1	1				1	1	1											1	1	1	1	1	1	1	1				1				1				1	1	1	1	1
39	Q16629	SRSF7	1	1	1	1	1	1	1	1		1					1																						1	1
40	P31942	HNRNPH3	1				1	1	1											1	1		1	1															1	1				1	1
41	Q15717	ELAVL1	1										1	1		1				1	1		1	1															1	1
42	O15042	U2SURP	1				1																																1	1
43	O43795	MYO1B																	1
44	O60488	ACSL4																		1	1	1	1	1	1	1		1	1								1
45	P26368	U2AF2	1	1	1	1	1	1	1	1		1					1								1	1	1							1	1				1	1		1	1	1	1		1	1	1
46	P51153	RAB13																1		1	1	1	1	1	1	1		1	1	1		1	1	1			1
47	P84103	SRSF3	1	1	1	1	1	1	1	1		1					1																						1	1
48	Q15427	SF3B4	1				1	1	1																														1	1				1	1
49	O00159	MYO1C	1									1													1		1	1	1		1	1		1		1			1	1	1
50	Q13283	G3BP1																							1							1	1	1					1					1
51	P26196	DDX6	1				1				1		1	1		1				1	1	1	1	1														1						1
52	Q9BUJ2	HNRNPUL1	1	1			1	1	1																1	1													1	1				1
53	O75533	SF3B1	1				1	1	1											1	1																		1	1		1	1	1	1	1	1	1
54	P62888	RPL30	1				1						1	1	1																							1	1					1
55	Q9BWJ5	SF3B5	1				1	1	1																														1	1				1	1	1
56	Q13636	RAB31																	1						1			1	1	1		1	1	1		1	1
57	Q9Y262	EIF3L	1										1	1	1	1																							1	1	1			1
58	Q9Y3D6	FIS1											1							1	1		1		1							1		1	1
59	Q05519	SRSF11	1	1	1	1	1	1	1	1		1					1																						1	1
60	P53999	SUB1	1	1	1		1																		1							1		1					1		1
[truncated: 27 more columns]

## Sheet: Imp-9
GO Terms for Imp-9 3rd-Z-4% Cargoes		Term Type	BP																											CC
		Term ID	GO:0010467	GO:0006351	GO:0006366	GO:0016070	GO:0034470	GO:0006397	GO:0000398	GO:0000387	GO:0006402	GO:0000184	GO:0019538	GO:0006412	GO:0006413	GO:0006414	GO:0006415	GO:0042254	GO:0006364	GO:0042273	GO:0042255	GO:0045047	GO:0006614	GO:0050896	GO:0042221	GO:0070887	GO:0010033	GO:0016259	GO:0016032	GO:0005634	GO:0005654	GO:0005730	GO:0016604	GO:0016607	GO:0015030	GO:0000791	GO:0005694	GO:1990904	GO:0005681	GO:0071013	GO:0030532	GO:0097525	GO:0044391	GO:0015934	GO:0005737	GO:0005829	GO:0044445	GO:0005739	GO:0005925
Rank by 3rd Z-score (Imp-9)		Term Name	Gene expression	Transcription, DNA-templated	Transcription from RNA polymerase II promoter	RNA metabolic process	ncRNA processing	mRNA processing	mRNA splicing, via spliceosome	Spliceosomal snRNP assembly	mRNA catabolic process	Nuclear-transcribed mRNA catabolic process, nonsense-mediated decay	Protein metabolic process	Translation	Translational initiation	Translational elongation	Translational termination	Ribosome biogenesis	rRNA processing	Ribosomal large subunit biogenesis	Ribosome assembly	Protein targeting to ER	SRP-dependent cotranslational protein targeting to membrane	Response to stimulus	Response to chemical	Cellular response to chemical stimulus	Response to organic substance	Selenocysteine metabolic process	Viral process	Nucleus	Nucleoplasm	Nucleolus	Nuclear body	Nuclear speck	Cajal body	Euchromatin	Chromosome	Ribonucleoprotein complex	Spliceosomal complex	Catalytic step 2 spliceosome	Small nuclear ribonucleoprotein complex	Spliceosomal snRNP complex	Ribosomal subunit	Large ribosomal subunit	Cytoplasm	Cytosol	Cytosolic part	Mitochondrion	Focal adhesion
	Accession	Gene Name	35	17	11	36	5	10	10	3	8	8	17	9	8	8	8	8	4	3	3	8	8	21	15	12	13	8	14	42	22	12	5	4	3	3	7	19	8	6	5	5	8	7	33	12	8	11	6
1	P0C0S5	H2AFZ	1	1	1	1																		1	1	1	1			1						1	1
2	P24752	ACAT1																						1	1		1																		1			1
3	O00622	CYR61	1	1	1	1							1											1	1	1	1
4	Q9UKM9	RALY	1			1		1	1																					1								1	1	1
5	Q96AE4	FUBP1	1	1	1	1																								1	1
6	P38159	RBMX	1	1	1	1		1	1				1											1	1	1	1			1	1					1	1	1	1	1
7	P00505	GOT2																						1	1		1																		1			1
8	P26440	IVD																												1	1														1			1
9	P02786	TFRC																						1	1	1	1		1																1			1
10	O75390	CS																												1															1			1
11	O94906	PRPF6	1	1	1	1		1	1	1																				1	1		1	1				1	1	1	1	1
12	P38646	HSPA9											1											1	1	1	1			1		1													1			1	1
13	Q9BUJ2	HNRNPUL1	1	1		1		1	1															1						1	1							1
14	Q9Y5B9	SUPT16H	1	1	1	1																		1					1	1	1						1
15	Q14692	BMS1																1			1									1		1
16	Q6DD87	ZNF787
17	Q03164	KMT2A	1	1	1	1							1											1	1	1				1	1														1
18	P56270	MAZ	1	1	1	1																								1
19	P34897	SHMT2											1											1	1		1			1															1			1
20	Q7L2E3	DHX30	1			1												1		1	1																	1							1			1
21	Q9UQ35	SRRM2	1			1		1	1																					1	1		1	1	1			1	1	1
22	O43290	SART1	1			1	1	1	1	1								1	1					1						1	1		1		1			1	1	1	1	1			1	1
23	P07305	H1F0																												1	1					1	1								1
24	P11177	PDHB																												1	1														1			1
25	O43395	PRPF3	1			1		1	1	1																				1	1		1	1	1			1	1		1	1			1
26	Q6RFH5	WDR74				1																								1		1
27	P46776	RPL27A	1			1					1	1	1	1	1	1	1					1	1					1	1									1					1	1	1	1	1
28	P14923	JUP	1	1		1																		1	1	1	1			1															1	1			1
29	P42765	ACAA2																						1	1	1																			1			1
30	Q92841	DDX17	1	1	1	1																		1						1	1	1
31	P62081	RPS7	1			1	1				1	1	1	1	1	1	1	1	1			1	1					1	1	1		1						1					1		1	1	1		1
32	Q96QC0	PPP1R10	1	1		1																								1	1						1
33	Q9BWJ5	SF3B5	1			1		1	1																					1	1							1	1		1	1
34	Q86V81	ALYREF
35	O43709	WBSCR22	1	1		1	1											1	1											1		1													1
36	Q9NZM1	MYOF																						1	1	1	1			1															1
37	Q9GZR7	DDX24				1																								1		1
38	P25490	YY1	1	1	1	1																		1	1	1	1			1							1								1
39	P62750	RPL23A	1			1					1	1	1	1	1	1	1	1		1	1	1	1					1	1	1		1						1					1	1	1	1	1
40	P18077	RPL35A	1			1	1				1	1	1	1	1	1	1	1	1	1		1	1					1	1									1					1	1	1	1	1	1
41	P52948	NUP98	1			1	1						1											1	1	1	1		1	1	1														1	1
42	P20700	LMNB1																												1	1
43	P23284	PPIB											1																1	1															1				1
44	Q92879	CELF1	1			1		1	1				1	1																1	1							1							1
45	P61313	RPL15	1			1					1	1	1	1	1	1	1					1	1					1	1	1								1					1	1	1	1	1
46	Q08945	SSRP1	1	1	1	1																		1					1	1	1	1					1								1
47	Q9NYF8	BCLAF1	1	1		1																		1						1	1	1	1	1											1
48	P09661	SNRPA1	1			1		1	1																					1	1							1	1	1	1	1
49	P08174	CD55	1										1											1	1	1	1		1																1	1
50	P62424	RPL7A	1			1					1	1	1	1	1	1	1	1				1	1					1	1	1		1						1					1	1	1	1	1		1
51	Q8WY36	BBX	1	1		1																								1	1														1
52	Q9Y3U8	RPL36	1			1					1	1	1	1	1	1	1					1	1					1	1	1		1						1					1	1	1	1	1
53	P61353	RPL27	1			1					1	1	1	1	1	1	1					1	1					1	1	1								1					1	1	1	1	1		1
[truncated: 8 more columns]

[truncated: 3 more sheets: Imp-11, Imp-13, Exp-4]
