# Supplementary material for: Extensive cargo identification reveals distinct biological roles of the 12 importin pathways
Source: eLife. 2017 Jan 24;6:e21184. doi: 10.7554/eLife.21184 (PMC5305215; doi:10.7554/eLife.21184)
Supplement: Supplementary file 10. — Each sheet shows the correspondences between the 2nd-Z-15% cargoes of one NTR and selected GO terms. A term annotation to a cargo is indicated by ‘1’ in the corresponding cell. Reported cargoes are indicated by magenta in the gene name cells, and the results of the bead halo assays (Supplementary file 2) are also indicated by colors in the gene name cells: blue, cargoes directly bound to the NTR; light blue, cargoes directly bond to Imp-α but not Imp-β; gray, proteins that did not bind to the NTR. GO terms that represent many similar terms were selected from the terms enriched significantly (p<0.05) for the 2nd-Z-15% cargoes of each NTR, and broadly defined terms were deselected. Magenta and orange in the term ID cells indicate terms that are significantly enriched for the cargoes of four or fewer NTRs, and of them magenta indicates the terms presented in Supplementary file 6A. Related GO terms are bundled in the same color, and different colors are used to distinguish the columns easily. The NTRs added in the transport reactions (white in the rank cells) were not analyzed. This table was derived from Supplementary file 8. For 3rd-Z-4% cargoes, see Supplementary file 9. DOI: http://dx.doi.org/10.7554/eLife.21184.026 [file elife-21184-supp10.xlsx]

## Sheet: Legend
Supplementary file 10
Correspondences between the 2nd-Z-15% cargoes and Gene Ontology (GO) terms
Each sheet shows the correspondences between the 2nd-Z-15% cargoes of one NTR and selected GO terms. A term annotation to a cargo is indicated by “1” in the corresponding cell. Reported cargoes are indicated by magenta in the gene name cells, and the results of the bead halo assays (Supplementary file 2) are also indicated by colors in the gene name cells: blue, cargoes directly bound to the NTR;…
Imp-β	Trn-1	Trn-2	Trn-SR	Imp-4	Imp-5
Imp-7	Imp-8	Imp-9	Imp-11	Imp-13	Exp-4
(13 sheets including this one)

## Sheet: Imp-β 
GO Terms for Imp-β 2nd-Z-4% Cargoes		Term Type	BP
		Term ID	GO:0006259	GO:0006260	GO:0006278	GO:0006261	GO:0006310	GO:0044728	GO:0071103	GO:0006281	GO:0006283	GO:0006997	GO:0034728	GO:0006337	GO:0006333	GO:0031498	GO:0016568	GO:0016569	GO:0006338	GO:0006325	GO:0051276	GO:0032200	GO:0007004	GO:0010467	GO:0006351	GO:0006360	GO:0006366	GO:0006367	GO:0006368	GO:0006369	GO:0098781	GO:0016458	GO:0031047	GO:0016070	GO:0034660	GO:0008033	GO:0006397	GO:0006370	GO:0000398	GO:0045292	GO:0031124	GO:0006378	GO:0010501	GO:0009451	GO:0051028	GO:0042254	GO:0009303	GO:0006364	GO:0019538
Rank by 2nd Z-score (Imp-β)		Term Name	DNA metabolic process	DNA replication	RNA-dependent DNA replication	DNA-dependent DNA replication	DNA recombination	DNA methylation or demethylation	DNA conformation change	DNA repair	Transcription-coupled nucleotide-excision repair	Nucleus organization	Nucleosome organization	Nucleosome disassembly	Chromatin assembly or disassembly	Chromatin disassembly	Chromatin modification	Covalent chromatin modification	Chromatin remodeling	Chromatin organization	Chromosome organization	Telomere organization	Telomere maintenance via telomerase	Gene expression	Transcription, DNA-templated	Transcription from RNA polymerase I promoter	Transcription from RNA polymerase II promoter	Transcription initiation from RNA polymerase II promoter	Transcription elongation from RNA polymerase II promoter	Termination of RNA polymerase II transcription	ncRNA transcription	Gene silencing	Gene silencing by RNA	RNA metabolic process	ncRNA metabolic process	tRNA processing	mRNA processing	7-methylguanosine mRNA capping	mRNA splicing, via spliceosome	mRNA cis splicing, via spliceosome	mRNA 3'-end processing	mRNA polyadenylation	RNA secondary structure unwinding	RNA modification	mRNA transport	Ribosome biogenesis	rRNA transcription	rRNA processing	Protein metabolic process
	Accession	Gene Name	41	16	5	8	11	6	9	22	6	9	8	4	10	4	25	15	12	30	45	10	5	170	93	8	58	10	10	8	5	17	14	156	41	11	62	9	42	6	12	5	10	8	20	22	5	16	86
1	Q14974	KPNB1
2	O43148	RNMT																						1	1		1							1			1	1						1
3	Q9BTL3	FAM103A1																						1										1			1	1
4	Q9BW19	KIFC1																			1
5	Q2NL82	TSR1																																												1
6	Q86U86	PBRM1															1		1	1	1			1	1									1
7	P00533	EGFR	1	1						1														1	1		1							1															1
8	P00367	GLUD1
9	Q15773	MLF2
10	P07305	H1F0	1						1				1		1					1	1
11	Q9GZS1	POLR1E																						1	1	1					1			1	1												1
12	P04843	RPN1																						1																									1
13	P06576	ATP5B
14	P40939	HADHA
15	P17544	ATF7																						1	1		1							1
16	Q9BV86	NTMT1																																															1
17	Q4G0N4	NADKD1
18	P36776	LONP1	1																																														1
19	P52298	NCBP2																						1	1		1		1	1		1	1	1	1		1	1	1	1	1				1				1
20	Q96AG4	LRRC59
21	P35658	NUP214										1												1								1	1	1	1	1									1				1
22	Q9NRZ9	HELLS	1					1	1						1		1	1	1	1	1			1	1							1		1
23	Q9NZM1	MYOF
24	Q8NHQ9	DDX55																																1									1
25	Q09161	NCBP1																						1	1		1		1	1		1	1	1	1		1	1	1	1	1				1				1
26	Q02218	OGDH
27	Q6P6C2	ALKBH5																						1										1			1							1	1
28	Q7L0Y3	TRMT10C																						1										1	1	1								1
29	Q92945	KHSRP																						1	1									1	1		1								1
30	Q99567	NUP88										1												1								1	1	1	1	1									1	1			1
31	P23511	NFYA																						1	1		1							1
32	Q5T4S7	UBR4																																															1
33	Q13330	MTA1	1							1										1	1			1	1									1															1
34	P55809	OXCT1
35	P35269	GTF2F1																						1	1		1	1	1					1			1	1	1
36	P31930	UQCRC1																						1																									1
37	Q9BXP5	SRRT																						1	1							1	1	1	1														1
38	Q9NVN8	GNL3L	1	1	1																1	1	1																							1			1
39	Q14558	PRPSAP1
40	Q14126	DSG2
41	Q9UIG0	BAZ1B	1							1					1		1	1	1	1	1			1	1									1															1
42	P62805	HIST1H4A	1				1	1	1	1			1		1		1	1	1	1	1	1		1	1							1	1	1															1
43	Q15061	WDR43
44	Q6PI48	DARS2																						1										1	1														1
45	Q6DD87	ZNF787
46	P18754	RCC1
47	P15586	GNS
48	O00622	CYR61																						1	1		1							1															1
49	Q5VV52	ZNF691																						1	1									1
50	Q7Z6I8	C5orf24
51	A0FGR8	ESYT2
52	P16083	NQO2
53	Q9BZZ5	API5
54	P07339	CTSD																																															1
55	Q96P11	NSUN5																						1										1	1											1		1
56	P49761	CLK3																						1										1															1
57	Q9P2N5	RBM27																						1										1			1
58	Q9HCK8	CHD8							1								1		1	1	1			1	1		1							1
59	P31150	GDI1
60	O75717	WDHD1																		1	1			1										1
61	P13984	GTF2F2																						1	1		1	1	1					1			1	1	1
62	Q13573	SNW1															1	1		1	1			1	1		1	1						1			1		1										1
63	Q16222	UAP1																																															1
64	Q12849	GRSF1																						1										1	1	1	1				1	1
65	P51532	SMARCA4											1	1	1	1	1		1	1	1			1	1	1	1				1			1	1												1
66	Q86U70	LDB1															1	1		1	1			1	1		1							1															1
67	P17028	ZNF24																						1	1									1
68	P17844	DDX5																						1	1		1							1			1		1				1
69	P10809	HSPD1	1				1																	1																									1
70	Q15054	POLD3	1	1		1	1			1	1										1	1
71	Q9P032	NDUFAF4
72	Q8TF01	PNISR
73	Q86U38	NOP9
74	Q99661	KIF2C																			1
75	P04181	OAT
76	Q5VW32	BROX
77	Q5SRE5	NUP188										1												1								1	1	1	1	1									1				1
78	Q96GQ7	DDX27																						1										1	1								1			1		1
79	Q9NV56	MRGBP															1	1		1	1			1	1		1							1															1
80	P49005	POLD2	1	1		1	1			1	1										1	1
81	P52292	KPNA2	1				1			1
82	P34897	SHMT2																																															1
83	Q14643	ITPR1
84	Q86V81	ALYREF
85	Q14498	RBM39																						1	1									1			1
86	Q9NWH9	SLTM																						1	1									1
87	Q8IWX8	CHERP																						1										1
88	Q16698	DECR1
89	Q00325	SLC25A3																						1																									1
90	Q13428	TCOF1																						1	1	1					1			1	1												1
91	Q9Y5S2	CDC42BPB																																															1
92	O75223	GGCT
93	Q9BUQ8	DDX23																						1										1			1		1	1			1
94	P49711	CTCF	1					1	1				1		1		1	1		1	1			1	1		1							1															1
95	P54278	PMS2	1				1			1
96	O15446	CD3EAP																						1	1	1					1			1	1												1
97	Q969G3	SMARCE1											1	1	1	1	1		1	1	1			1	1		1							1
98	Q9NQW6	ANLN
99	Q9H0C8	ILKAP																																															1
100	Q9ULW0	TPX2																																															1
101	O75683	SURF6																																												1
102	Q6XQN6	NAPRT1
103	Q9NY93	DDX56																						1										1	1								1			1		1
104	Q96RN5	MED15																						1	1		1	1						1
105	Q96FV9	THOC1	1	1		1	1																	1	1									1			1								1
106	Q6PD62	CTR9															1	1		1	1			1	1		1		1					1			1				1	1							1
107	Q9NV06	DCAF13																						1										1	1											1		1	1
108	O75390	CS
109	P56270	MAZ																						1	1		1	1		1				1
110	Q32MZ4	LRRFIP1																						1	1		1							1
111	P23246	SFPQ	1				1			1							1	1		1	1			1	1		1							1			1		1										1
112	P06732	CKM
113	Q66PJ3	ARL6IP4																						1										1			1
114	Q9Y3B9	RRP15
115	Q9BRL6	SRSF8																						1										1			1
116	Q9Y2W2	WBP11																						1										1	1		1		1	1						1		1
117	Q16718	NDUFA5
118	P55265	ADAR																						1								1	1	1	1		1							1					1
119	Q9P016	THYN1
120	Q13642	FHL1
121	Q4VC31	CCDC58
122	O43852	CALU
123	Q00839	HNRNPU	1	1	1																1	1	1	1										1			1		1
124	P08047	SP1																						1	1		1	1						1
125	P30048	PRDX3																						1	1									1															1
126	Q9Y5J1	UTP18																						1										1	1											1		1
127	P51948	MNAT1	1							1	1													1	1	1	1	1	1					1			1	1											1
128	Q9BUI4	POLR3C																						1	1									1
129	P52789	HK2
130	P02545	LMNA										1												1	1		1							1															1
131	Q8WVY7	UBLCP1																																															1
132	P57740	NUP107										1									1			1	1							1	1	1	1	1									1				1
133	Q01130	SRSF2																						1	1		1			1				1			1		1		1				1
134	O75937	DNAJC8																						1										1			1		1
135	Q10713	PMPCA																						1																									1
136	O00505	KPNA3
137	Q9BVJ6	UTP14A																						1										1	1											1		1
138	Q86TI2	DPP9																																															1
139	Q8IWC1	MAP7D3
140	Q9UKV3	ACIN1							1												1			1										1			1		1
141	Q1KMD3	HNRNPUL2
142	P46013	MKI67	1
143	O75915	ARL6IP5																																															1
144	Q15072	ZNF146																						1	1									1
145	Q8WVV9	HNRPLL																						1										1			1
146	O43598	DNPH1
147	P61244	MAX																						1	1		1							1
148	Q15014	MORF4L2	1							1							1	1	1	1	1			1	1		1					1		1															1
149	Q9H6F5	CCDC86
150	P49792	RANBP2										1												1								1	1	1	1	1									1				1
151	O43663	PRC1
152	P25815	S100P
153	Q9C0J8	WDR33	1							1														1										1			1				1	1
154	Q6NZI2	PTRF																						1	1	1								1
155	Q9Y657	SPIN1															1			1	1			1	1						1			1	1												1
156	P35232	PHB	1														1	1		1	1			1	1		1							1															1
157	Q5JRX3	PITRM1																						1																									1
158	Q15717	ELAVL1																						1																									1
159	Q96SI1	KCTD15
160	Q8TDN6	BRIX1																																												1
161	Q96HH9	GRAMD3
162	Q9NW64	RBM22																						1										1			1		1	1
163	Q6PJT7	ZC3H14																						1										1			1				1	1
164	Q00610	CLTC
165	Q14155	ARHGEF7
166	Q9H814	PHAX																						1										1	1		1		1
167	O75475	PSIP1																						1	1		1							1			1		1	1
168	P25705	ATP5A1
169	P30533	LRPAP1
170	Q9NR30	DDX21																						1	1		1							1	1								1			1		1
171	Q12931	TRAP1																						1																									1
172	Q9Y305	ACOT9
173	O15042	U2SURP																						1										1
174	P53367	ARFIP1
175	O60220	TIMM8A																																															1
176	Q9BV38	WDR18
177	P61221	ABCE1																																1
178	Q9NQ29	LUC7L																						1										1			1		1
179	Q8TAQ2	SMARCC2											1	1	1	1	1		1	1	1			1	1		1							1
180	P17096	HMGA1	1	1		1			1	1			1	1	1	1	1		1	1	1			1	1		1					1		1
181	Q96AE4	FUBP1																						1	1		1							1
182	Q9NTI5	PDS5B																			1
183	Q96G46	DUS3L																						1										1	1	1								1
184	O00161	SNAP23
185	O14776	TCERG1																						1	1		1							1
186	P42765	ACAA2
187	Q8N684	CPSF7																						1	1		1			1				1			1		1		1
188	Q15651	HMGN3															1			1	1			1	1		1							1
189	O00541	PES1										1												1										1	1											1		1
190	Q01081	U2AF1																						1	1		1			1				1			1		1		1				1
191	Q8NBJ7	SUMF2																																															1
192	O60841	EIF5B																						1																									1
193	P53999	SUB1																						1	1		1							1
194	Q92917	GPKOW
195	O14519	CDK2AP1	1	1		1																																											1
196	P30086	PEBP1																																															1
197	O75340	PDCD6																						1																									1
198	P49959	MRE11A	1	1	1	1	1		1	1											1	1	1																										1
199	Q99590	SCAF11																						1										1			1		1
200	Q8IZL8	PELP1																						1	1		1							1
201	O75940	SMNDC1																						1										1			1
202	Q9UQ35	SRRM2																						1										1			1		1
203	Q9Y3C1	NOP16																																												1
204	P61218	POLR2F	1							1	1													1	1	1	1	1	1			1	1	1	1		1	1	1
205	Q71RC2	LARP4
206	Q9H307	PNN																						1	1									1			1		1
207	Q92841	DDX17																						1	1		1							1									1
208	P61289	PSME3																						1																									1
209	P21127	CDK11B
210	O43719	HTATSF1																						1	1		1							1			1		1
211	P38159	RBMX																						1	1		1							1			1		1										1
212	Q9H1D9	POLR3F																						1	1									1
213	Q9BTD8	RBM42																						1										1			1		1
214	Q96MU7	YTHDC1																						1										1			1		1
215	P17706	PTPN2																																															1
216	Q8IX12	CCAR1																						1	1									1			1		1
217	Q86YP4	GATAD2A	1					1																1	1		1							1
218	Q9ULC4	MCTS1																						1	1									1															1
219	Q9NZ63	C9orf78
220	P35637	FUS																						1										1			1		1
221	Q7L014	DDX46																						1										1			1		1				1
222	O14979	HNRPDL																						1	1									1
223	O43709	WBSCR22															1			1	1			1	1									1	1											1		1
224	O95400	CD2BP2																						1										1			1		1										1
225	Q92804	TAF15																						1	1									1
226	Q9H2U1	DHX36	1																		1	1		1	1		1							1									1
227	P09038	FGF2																						1	1		1							1															1
228	P31040	SDHA
229	Q9UBD5	ORC3	1	1
230	Q69YN2	CWF19L1
231	Q6YHK3	CD109																																															1
232	Q13636	RAB31
233	Q13112	CHAF1B	1	1					1	1			1		1					1	1			1	1									1
234	Q10471	GALNT2																																															1
235	Q9Y2X9	ZNF281																						1	1		1							1
236	P50416	CPT1A
237	P46087	NOP2																						1										1	1											1		1
238	P42166	TMPO																						1	1									1
239	Q92979	EMG1																						1										1	1									1		1		1
240	P10606	COX5B																						1	1		1	1						1
241	Q9NR56	MBNL1																						1										1			1		1
242	P51946	CCNH	1							1	1													1	1	1	1	1	1					1			1	1											1
243	O15460	P4HA2																																															1
244	Q96EK6	GNPNAT1																																															1
245	P09651	HNRNPA1	1	1	1																1	1	1	1										1			1		1						1
246	Q5T1J5	CHCHD2P9
247	Q13151	HNRNPA0																						1										1			1		1
248	Q8IWS0	PHF6																						1	1									1
249	Q8WXX5	DNAJC9
250	Q8TAP9	MPLKIP
251	O95232	LUC7L3																						1										1			1		1
252	P53701	HCCS
253	Q92733	PRCC
254	Q9UNW1	MINPP1
255	O75530	EED															1	1		1	1			1	1		1							1															1
256	P30084	ECHS1
257	O95394	PGM3																																															1
258	Q9Y3B2	EXOSC1																						1										1	1											1		1
259	Q8IZ73	RPUSD2																						1										1	1	1								1
260	Q9Y697	NFS1																																															1
261	P26368	U2AF2																						1	1		1			1				1			1		1		1				1
262	P05114	HMGN1	1							1	1									1	1			1	1		1							1
263	O60832	DKC1	1	1	1																1	1	1	1										1	1									1		1		1
264	O75691	UTP20																						1										1	1											1		1
265	O43660	PLRG1																						1										1			1		1
266	Q9UKY7	CDV3
267	P07203	GPX1																						1																									1
268	P05204	HMGN2
269	Q15004	KIAA0101	1	1						1
270	P82979	SARNP																						1	1									1											1				1
271	P78406	RAE1										1												1								1	1	1	1	1									1				1
272	Q99541	PLIN2
273	O43768	ENSA																																															1
274	P84103	SRSF3																						1	1		1			1				1			1		1		1				1
275	O75822	EIF3J																						1																									1
276	Q9GZR2	REXO4																						1	1									1
277	Q7KZ85	SUPT6H	1				1										1	1	1	1	1			1	1		1		1					1			1								1				1
278	Q9Y2R4	DDX52																						1										1	1								1			1		1
279	P21266	GSTM3
280	Q9H3P2	NELFA															1	1		1	1			1	1		1		1					1															1
281	Q16630	CPSF6																						1										1			1				1	1
282	Q96CN7	ISOC1
283	Q9Y6I4	USP3	1							1							1	1		1	1																												1
284	Q9P258	RCC2
285	Q7Z3K3	POGZ																			1
286	Q13362	PPP2R5C																						1																									1
287	P27695	APEX1	1	1		1	1	1		1											1	1		1	1									1
288	Q9Y5N6	ORC6	1	1		1
289	P36543	ATP6V1E1
290	P08174	CD55																						1																									1
291	Q9Y383	LUC7L2																						1										1			1		1
292	Q99459	CDC5L	1							1														1	1									1			1		1
293	Q9HCC0	MCCC2
294	P09543	CNP
295	O00629	KPNA4
296	P49458	SRP9																						1																									1
297	Q8N1F7	NUP93										1												1								1	1	1	1	1									1				1
298	P13674	P4HA1																																															1
299	P40818	USP8																																															1
300	Q8WXI9	GATAD2B	1					1									1		1	1	1			1	1		1							1
301	P22626	HNRNPA2B1																						1	1		1					1	1	1	1		1		1						1				1
302	O95573	ACSL3
303	P08621	SNRNP70																						1										1			1		1										1
304	Q8NEM2	SHCBP1
[truncated: 132 more columns]

## Sheet: Trn-1
GO Terms for Trn-1 2nd-Z-4% Cargoes		Term Type	BP
		Term ID	GO:0006259	GO:0006260	GO:0016568	GO:0006325	GO:0051276	GO:0010467	GO:0006351	GO:0006366	GO:0006369	GO:0016458	GO:0031047	GO:0016070	GO:0034660	GO:0006397	GO:0000398	GO:0031124	GO:0048255	GO:0051028	GO:0042254	GO:0019538	GO:0006412	GO:0006414	GO:0006457	GO:0006458	GO:0043623	GO:0051258	GO:0036211	GO:0006468	GO:0006913	GO:0051170	GO:0006606	GO:0051168	GO:0006611	GO:0070585	GO:0008283	GO:0001775	GO:0007049	GO:0051301	GO:0044839	GO:0000280	GO:0007051	GO:0007052	GO:0000910	GO:0032502	GO:0048731	GO:0048513	GO:0009888
Rank by 2nd Z-score (Trn-1)		Term Name	DNA metabolic process	DNA replication	Chromatin modification	Chromatin organization	Chromosome organization	Gene expression	Transcription, DNA-templated	Transcription from RNA polymerase II promoter	Termination of RNA polymerase II transcription	Gene silencing	Gene silencing by RNA	RNA metabolic process	ncRNA metabolic process	mRNA processing	mRNA splicing, via spliceosome	mRNA 3'-end processing	mRNA stabilization	mRNA transport	Ribosome biogenesis	Protein metabolic process	Translation	Translational elongation	Protein folding	De novo protein folding	Cellular protein complex assembly	Protein polymerization	Protein modification process	Protein phosphorylation	Nucleocytoplasmic transport	Nuclear import	Protein import into nucleus	Nuclear export	Protein export from nucleus	Protein localization to mitochondrion	Cell proliferation	Cell activation	Cell cycle	Cell division	Cell cycle G2/M phase transition	Nuclear division	Spindle organization	Mitotic spindle organization	Cytokinesis	Developmental process	System development	Animal organ development	Tissue development
	Accession	Gene Name	24	10	12	15	18	121	69	44	6	8	8	102	17	40	32	6	5	14	11	86	26	8	15	5	13	9	46	22	24	12	11	16	5	7	35	21	46	22	8	18	12	8	8	103	73	44	34
1	P18846	ATF1	1	1				1	1	1				1								1					1		1	1																1	1
2	Q07666	KHDRBS1						1	1					1		1						1	1								1			1			1		1		1
3	Q9UKD2	MRTO4																			1
4	P52272	HNRNPM						1						1		1	1
5	Q13509	TUBB3																				1			1	1													1			1				1	1
6	Q99729	HNRNPAB						1	1	1				1																																1	1	1	1
7	P09651	HNRNPA1	1	1			1	1						1		1	1			1											1	1		1
8	Q14103	HNRNPD						1	1					1		1	1		1			1	1																							1	1	1
9	Q13895	BYSL						1						1	1						1																1									1	1	1
10	Q86V81	ALYREF
11	Q13151	HNRNPA0						1						1		1	1		1
12	Q96PU8	QKI						1						1		1				1		1	1																							1	1
13	P51991	HNRNPA3						1						1		1	1			1
14	O94992	HEXIM1						1	1	1				1								1							1	1									1							1	1	1
15	Q92621	NUP205						1				1	1	1	1					1		1					1		1		1	1	1						1
16	P22626	HNRNPA2B1						1	1	1		1	1	1	1	1	1			1		1	1								1			1
17	Q9GZT3	SLIRP						1	1					1																																1
18	Q08379	GOLGA2																				1					1	1	1										1	1		1	1	1
19	Q01844	EWSR1						1	1					1
20	P23511	NFYA						1	1	1				1																							1									1
21	Q86U42	PABPN1						1	1	1	1			1		1	1	1		1											1			1
22	P26440	IVD
23	Q9Y5L4	TIMM13																				1														1
24	O00151	PDLIM1						1	1					1
25	Q96KB5	PBK																				1							1	1									1			1
26	P06703	S100A6																																			1									1	1
27	Q05639	EEF1A2						1														1	1	1
28	O00567	NOP56						1						1	1						1
29	P45973	CBX5						1	1					1
30	Q9Y2V2	CARHSP1						1	1					1
31	O60828	PQBP1						1	1					1		1	1																													1	1
32	Q99829	CPNE1						1	1					1								1																								1	1
33	P49588	AARS						1						1	1							1	1	1	1																					1	1	1	1
34	P31943	HNRNPH1						1						1		1	1
35	Q04837	SSBP1	1	1																																										1
36	P30046	DDT
37	Q14019	COTL1
38	P02795	MT2A
39	Q04828	AKR1C1																																												1			1
40	Q9NTK5	OLA1
41	P55795	HNRNPH2						1						1		1	1
42	P63241	EIF5A						1												1		1	1	1					1		1			1	1		1
43	Q14847	LASP1
44	P62328	TMSB4X																																				1
45	P13804	ETFA
46	P35637	FUS						1						1		1	1
47	Q15645	TRIP13	1				1	1	1	1				1																									1			1				1
48	Q99733	NAP1L4				1	1
49	P42330	AKR1C3																													1	1	1				1									1	1	1	1
50	Q9ULC4	MCTS1						1	1					1								1	1														1		1
51	Q15717	ELAVL1						1											1			1	1																							1
52	Q96DG6	CMBL
53	P61160	ACTR2																									1	1											1	1		1			1	1	1
54	O76003	GLRX3
55	P50995	ANXA11																																					1	1
56	P22695	UQCRC2						1														1
57	Q7Z6I8	C5orf24
58	O00625	PIR						1	1	1				1																																1	1	1
59	P12814	ACTN1												1																								1								1	1	1
60	Q9HC35	EML4																																					1			1
61	P33552	CKS2																				1							1	1							1		1	1		1
62	P06732	CKM
63	P62633	CNBP						1	1	1				1																							1
64	Q06210	GFPT1						1														1							1
65	Q13610	PWP1						1	1					1
66	P07737	PFN1						1	1	1				1													1	1										1								1	1		1
67	P16949	STMN1																									1	1											1				1	1		1	1	1
68	O43707	ACTN4												1																								1								1
69	O43663	PRC1																																			1		1	1			1	1	1
70	Q96FW1	OTUB1	1		1	1	1															1							1
71	P60981	DSTN
72	Q96FV9	THOC1	1	1				1	1					1		1				1											1			1				1	1							1	1
73	Q5VW32	BROX
74	O75153	CLUH
75	P21291	CSRP1																																				1
76	P13693	TPT1																																												1			1
77	P49773	HINT1						1	1					1
78	O14737	PDCD5						1														1			1											1	1
79	P55209	NAP1L1	1	1		1	1																														1
80	Q14696	MESDC2																							1																					1			1
81	O75832	PSMD10						1	1	1				1								1					1		1	1	1	1	1						1	1					1	1	1
82	Q96I15	SCLY
83	P17812	CTPS1																																			1	1
84	Q14061	COX17																																												1	1	1
85	P68032	ACTC1						1																																						1	1	1	1
86	Q6DD87	ZNF787
87	Q96HC4	PDLIM5																																												1	1	1	1
88	Q04446	GBE1
89	Q00325	SLC25A3						1														1	1
90	Q15366	PCBP2						1						1		1	1					1
91	P10599	TXN						1	1	1				1								1			1				1	1	1	1	1	1	1		1
92	Q14247	CTTN																									1	1																		1	1
93	O94906	PRPF6						1	1	1				1		1	1
94	P32320	CDA
95	P52597	HNRNPF						1						1		1	1
96	Q9BQ69	MACROD1																				1							1
97	Q9NU22	MDN1																			1
98	P52292	KPNA2	1																												1	1	1
99	Q9NRR5	UBQLN4																				1
100	P07108	DBI																																												1	1	1	1
101	P43243	MATR3						1
102	P41236	PPP1R2																				1							1
103	P46108	CRK						1	1	1				1								1							1	1								1
104	P07437	TUBB																																					1	1	1		1
105	P60842	EIF4A1						1						1								1	1																							1	1	1
106	P30876	POLR2B	1					1	1	1		1	1	1	1	1	1																													1
107	Q13887	KLF5						1	1	1				1																																1	1	1	1
108	P26447	S100A4																																												1	1	1	1
109	P06396	GSN						1														1					1	1										1								1	1		1
110	P00367	GLUD1																																												1	1	1
111	P68104	EEF1A1						1	1					1								1	1	1
112	P37802	TAGLN2																																												1			1
113	O15143	ARPC1B																									1	1																		1	1
114	P62937	PPIA	1	1																		1			1				1									1
115	P62826	RAN	1					1	1			1	1	1	1						1	1	1								1	1	1	1	1				1	1		1	1	1
116	P30533	LRPAP1																							1
117	O60869	EDF1						1	1					1																																1			1
118	Q02241	KIF23																																					1	1		1	1	1	1
119	P56270	MAZ						1	1	1	1			1
120	Q00688	FKBP3																				1			1				1
121	Q9Y285	FARSA						1						1	1							1	1
122	P09496	CLTA																																												1	1
123	Q96TA1	FAM129B
124	P41223	BUD31						1	1	1				1		1	1
125	O00541	PES1						1						1	1						1																1		1
126	P60891	PRPS1																																												1	1	1
127	P16989	CSDA						1	1	1				1					1			1	1																							1	1	1	1
128	P31949	S100A11	1	1																																	1
129	P60953	CDC42	1	1				1														1							1	1							1	1	1	1		1			1	1	1	1	1
130	Q96RN5	MED15						1	1	1				1																																1
131	Q9UK76	HN1
132	Q9UJU6	DBNL																				1							1	1																1	1
133	Q9BQE3	TUBA1C																				1			1	1														1
134	O14979	HNRPDL						1	1					1
135	P35579	MYH9						1														1																1	1	1			1		1	1	1	1
136	Q10713	PMPCA						1														1														1
137	P06493	CDK1	1	1	1	1	1	1	1	1				1								1							1	1	1	1	1				1		1	1	1	1				1	1	1	1
138	Q9NQT4	EXOSC5	1					1						1	1						1
139	P30043	BLVRB
140	Q15019	SEPT2																																					1	1		1				1	1
141	Q16181	SEPT7																																					1	1		1			1	1
142	P30040	ERP29						1														1			1				1	1
143	P04792	HSPB1						1														1	1						1	1								1								1	1
144	P16152	CBR1																																												1			1
145	P23381	WARS						1						1	1							1	1														1									1	1
146	P60709	ACTB			1	1	1	1														1			1	1												1								1	1	1
147	Q9UQE7	SMC3	1	1			1															1							1										1	1		1	1	1		1
148	Q96KR1	ZFR																																												1
149	Q96CP2	FLYWCH2
150	P15121	AKR1B1																																			1									1	1	1
151	Q7KZ85	SUPT6H	1		1	1	1	1	1	1				1		1				1		1							1		1			1				1								1	1
152	Q9UNN5	FAF1																				1							1	1	1	1	1
153	Q5VTR2	RNF20			1	1	1	1	1					1		1		1				1							1
154	Q01081	U2AF1						1	1	1	1			1		1	1	1		1											1			1		1
155	P42765	ACAA2
156	P14174	MIF						1														1							1	1							1	1	1							1
157	P21333	FLNA						1	1	1				1								1									1	1	1					1	1			1	1	1		1	1	1	1
158	P27816	MAP4																																					1	1			1	1		1	1
159	O43813	LANCL1
160	Q9BW27	NUP85						1	1			1	1	1	1					1		1							1		1	1	1	1					1
161	Q14376	GALE
162	Q9H307	PNN						1	1					1		1	1
163	P43487	RANBP1																																					1	1		1	1			1	1
164	O15145	ARPC3																									1	1																		1	1
165	Q00341	HDLBP
166	O75400	PRPF40A						1						1		1	1																						1	1					1	1
167	P31942	HNRNPH3						1						1		1	1																													1			1
168	O00622	CYR61						1	1	1				1								1							1	1							1									1	1	1	1
169	P26641	EEF1G						1														1	1	1
170	P19623	SRM
171	P51659	HSD17B4																																												1	1	1	1
172	Q10471	GALNT2																				1							1
173	Q93052	LPP
174	Q9GZZ1	NAA50			1	1	1															1							1										1			1
175	Q16698	DECR1
176	P29692	EEF1D						1	1					1								1	1	1
177	P31947	SFN						1	1	1				1								1							1	1	1			1	1	1	1		1	1						1	1	1	1
178	Q96AE4	FUBP1						1	1	1				1
179	Q9UKY7	CDV3																																			1
180	P47813	EIF1AX						1														1	1
181	P36954	POLR2I	1					1	1	1		1	1	1	1	1	1																													1
182	P30154	PPP2R1B																				1							1																	1
183	Q14203	DCTN1																				1							1										1		1	1				1	1
184	Q96QK1	VPS35
185	Q04637	EIF4G1						1						1								1	1																							1	1
186	Q9BY44	EIF2A						1	1	1				1							1	1	1						1	1
187	P62805	HIST1H4A	1		1	1	1	1	1			1	1	1								1							1										1							1	1	1
188	Q92541	RTF1			1	1	1	1	1	1				1								1							1																	1			1
189	Q14839	CHD4			1	1	1	1	1	1				1																									1				1
190	P62879	GNB2
191	Q9Y3F4	STRAP						1	1	1				1		1	1					1							1	1							1									1	1	1	1
192	Q01780	EXOSC10						1						1	1						1
193	P68371	TUBB4B																				1			1	1													1		1
194	O15511	ARPC5																									1	1																		1	1
195	Q9NQ88	TIGAR	1					1	1	1				1																																1	1		1
196	Q13418	ILK						1	1	1				1								1							1	1							1	1	1							1	1	1	1
197	Q9UPN6	SCAF8						1						1		1
198	Q2NL82	TSR1																			1
199	P13639	EEF2						1														1	1	1					1								1									1	1	1	1
200	Q8N726	CDKN2A	1		1	1	1	1	1	1				1	1						1	1							1	1	1			1	1	1	1	1	1	1	1					1	1	1
201	P04080	CSTB																				1
202	P67809	YBX1						1	1	1				1		1	1		1																		1			1						1
203	Q9UQ35	SRRM2						1						1		1	1
204	P60903	S100A10																																												1
205	Q9UPT8	ZC3H4
206	O00422	SAP18				1	1	1	1	1				1		1	1
207	P30419	NMT1																				1							1							1										1
208	P52565	ARHGDIA																																												1	1
209	Q9NYV4	CDK12						1	1	1				1		1						1							1	1									1
210	Q8N183	NDUFAF2																									1
211	P04350	TUBB4A																				1			1	1													1		1
212	Q13247	SRSF6						1	1	1	1			1		1	1	1		1											1			1			1									1	1	1	1
213	Q13243	SRSF5						1	1	1	1			1		1	1	1		1											1			1					1							1	1	1
214	P24534	EEF1B2						1														1	1	1
215	Q9NWU2	GID8
216	P13797	PLS3																																												1	1	1	1
217	P49748	ACADVL																				1																								1			1
218	Q9BTY7	FAM203A
219	P23246	SFPQ	1		1	1	1	1	1	1				1		1	1					1							1										1
220	O60749	SNX2																																												1
221	Q8WXI9	GATAD2B	1		1	1	1	1	1	1				1
222	Q96G03	PGM2
223	Q14677	CLINT1
224	P61769	B2M																				1			1													1								1	1	1
225	Q6FI81	CIAPIN1																																												1	1	1
226	P26196	DDX6						1						1								1	1																							1	1
227	Q92879	CELF1						1				1	1	1		1	1					1	1																							1
228	P21281	ATP6V1B2
229	O76021	RSL1D1																																												1
230	O43488	AKR7A2
231	P60660	MYL6																																												1	1	1	1
232	Q92804	TAF15						1	1					1
233	Q96EP5	DAZAP1						1						1		1	1																				1									1	1	1
234	Q01130	SRSF2						1	1	1	1			1		1	1	1		1											1			1
235	P40939	HADHA
236	O14732	IMPA2
237	Q7Z2T5	TRMT1L						1						1	1
238	P47712	PLA2G4A																																			1	1								1	1	1	1
239	P07355	ANXA2																				1							1	1							1									1	1	1
240	Q8IWX8	CHERP						1						1																	1	1	1				1									1	1
241	Q12789	GTF3C1						1	1					1	1
242	Q13409	DYNC1I2																				1							1										1		1
243	P62995	TRA2B						1						1		1	1																													1	1	1
244	Q14498	RBM39						1	1					1		1
245	O75531	BANF1	1																																				1
246	P11413	G6PD						1	1	1				1								1							1																	1	1	1
247	O60884	DNAJA2																							1												1
[truncated: 126 more columns]

## Sheet: Trn-2
GO Terms for Trn-2 2nd-Z-4% Cargoes		Term Type	BP
		Term ID	GO:0006259	GO:0006260	GO:0006278	GO:0006310	GO:0006281	GO:0016568	GO:0006325	GO:0051276	GO:0032200	GO:0007004	GO:0010467	GO:0006351	GO:0006366	GO:0006368	GO:0006369	GO:0016458	GO:0016070	GO:0008334	GO:0034660	GO:0006397	GO:0000398	GO:0031124	GO:0000387	GO:0048255	GO:0006401	GO:0000291	GO:0043928	GO:0061157	GO:0051028	GO:0042254	GO:0006364	GO:0000460	GO:0043144	GO:0019538	GO:0006412	GO:0006457	GO:0061077	GO:0010608	GO:0036211	GO:0016925	GO:0006913	GO:0051168	GO:0016197	GO:0007049	GO:0032502	GO:0048731	GO:0048513
Rank by 2nd Z-score (Trn-2)		Term Name	DNA metabolic process	DNA replication	RNA-dependent DNA replication	DNA recombination	DNA repair	Chromatin modification	Chromatin organization	Chromosome organization	Telomere organization	Telomere maintenance via telomerase	Gene expression	Transcription, DNA-templated	Transcription from RNA polymerase II promoter	Transcription elongation from RNA polymerase II promoter	Termination of RNA polymerase II transcription	Gene silencing	RNA metabolic process	Histone mRNA metabolic process	ncRNA metabolic process	mRNA processing	mRNA splicing, via spliceosome	mRNA 3'-end processing	Spliceosomal snRNP assembly	mRNA stabilization	RNA catabolic process	Nuclear-transcribed mRNA catabolic process, exonucleolytic	Exonucleolytic nuclear-transcribed mRNA catabolic process involved in deadenylation-dependent decay	mRNA destabilization	mRNA transport	Ribosome biogenesis	rRNA processing	Maturation of 5.8S rRNA	snoRNA processing	Protein metabolic process	Translation	Protein folding	Chaperone-mediated protein folding	Posttranscriptional regulation of gene expression	Protein modification process	Protein sumoylation	Nucleocytoplasmic transport	Nuclear export	Endosomal transport	Cell cycle	Developmental process	System development	Animal organ development
	Accession	Gene Name	33	13	5	9	15	13	18	33	7	5	153	89	58	6	12	11	139	5	27	67	58	12	7	5	10	4	4	3	15	19	15	5	3	73	16	13	6	16	48	7	16	15	8	33	83	52	35
1	P18846	ATF1	1	1									1	1	1				1																	1					1						1	1
2	Q13509	TUBB3																																		1		1								1	1	1
3	Q9HA77	CARS2											1						1		1															1	1
4	Q07666	KHDRBS1											1	1					1			1														1	1			1			1	1		1
5	P52272	HNRNPM											1						1			1	1
6	Q00059	TFAM	1	1									1	1	1				1
7	P09651	HNRNPA1	1	1	1					1	1	1	1						1			1	1								1												1	1
8	Q14103	HNRNPD											1	1					1			1	1			1	1			1						1	1			1							1	1	1
9	Q9UKD2	MRTO4																														1
10	P13804	ETFA
11	P35232	PHB	1					1	1	1			1	1	1				1																	1					1						1
12	Q99729	HNRNPAB											1	1	1				1																												1	1	1
13	Q13151	HNRNPA0											1						1			1	1			1														1
14	P51991	HNRNPA3											1						1			1	1								1
15	Q5JRX3	PITRM1											1																							1
16	Q86V81	ALYREF
17	Q9Y5J1	UTP18											1						1		1											1	1
18	Q9NY93	DDX56											1						1		1											1	1
19	P22626	HNRNPA2B1											1	1	1			1	1		1	1	1								1					1	1			1			1	1
20	Q96PU8	QKI											1						1			1								1	1					1	1			1							1	1
21	P54886	ALDH18A1
22	Q86U42	PABPN1											1	1	1		1		1			1	1	1							1												1	1
23	Q01844	EWSR1											1	1					1
24	Q15070	OXA1L
25	P11177	PDHB
26	Q9P2R3	ANKFY1																																											1
27	P04844	RPN2											1																							1	1				1						1
28	O94906	PRPF6											1	1	1				1			1	1		1
29	O94992	HEXIM1											1	1	1				1																	1					1					1	1	1	1
30	O00567	NOP56											1						1		1											1	1
31	O60828	PQBP1											1	1					1			1	1																								1	1
32	P78318	IGBP1											1	1	1				1																	1					1
33	P62805	HIST1H4A	1			1	1	1	1	1	1		1	1				1	1																	1					1					1	1	1	1
34	Q16698	DECR1
35	Q96CP2	FLYWCH2
36	Q969Z0	TBRG4																																		1					1					1
37	Q15717	ELAVL1											1													1										1	1			1							1
38	P10809	HSPD1	1			1							1																							1		1	1								1	1
39	P06732	CKM
40	P31943	HNRNPH1											1						1			1	1
41	P23511	NFYA											1	1	1				1																												1
42	P55795	HNRNPH2											1						1			1	1
43	P35637	FUS											1						1			1	1
44	P42765	ACAA2
45	P07741	APRT																																													1	1	1
46	Q14696	MESDC2																																				1									1
47	O95336	PGLS
48	Q9NZM1	MYOF
49	P55209	NAP1L1	1	1					1	1
50	Q7Z6I8	C5orf24
51	P11498	PC											1
52	P52597	HNRNPF											1						1			1	1
53	P40261	NNMT																																													1	1	1
54	Q9H0S4	DDX47											1						1		1	1										1	1
55	P07951	TPM2
56	P62995	TRA2B											1						1			1	1																								1	1	1
57	O95801	TTC4
58	P11388	TOP2A	1			1				1			1	1	1				1																	1					1	1				1	1	1	1
59	Q15059	BRD3						1	1	1			1	1	1				1
60	O95551	TDP2	1				1												1
61	P30837	ALDH1B1
62	Q02818	NUCB1
63	Q9NRR5	UBQLN4																																		1
64	Q13887	KLF5											1	1	1				1																												1	1	1
65	P56270	MAZ											1	1	1		1		1
66	O75390	CS
67	Q9P2E9	RRBP1											1																							1	1										1
68	Q9NYL9	TMOD3																																												1	1	1	1
69	P17480	UBTF							1	1			1	1				1	1
70	O15446	CD3EAP											1	1					1		1
71	Q96IR7	HPDL
72	Q8N183	NDUFAF2
73	Q9UGI8	TES
74	Q5VTL8	PRPF38B											1						1			1
75	P08621	SNRNP70											1						1			1	1													1		1
76	Q15041	ARL6IP1
77	P0C0S5	H2AFZ							1	1			1	1	1			1	1
78	P50213	IDH3A
79	Q99459	CDC5L	1				1						1	1					1			1	1																							1
80	Q9NWB6	ARGLU1											1	1					1
81	Q92841	DDX17											1	1	1				1																												1	1	1
82	Q9H3U1	UNC45A																																				1	1								1	1	1
83	Q15233	NONO	1			1	1						1	1					1			1	1
84	P04179	SOD2											1	1	1				1																												1	1	1
85	P31942	HNRNPH3											1						1			1	1																								1
86	Q6DD87	ZNF787
87	Q8WYA6	CTNNBL1											1						1			1	1																								1	1
88	P17544	ATF7											1	1	1				1
89	O43813	LANCL1
90	Q9Y314	NOSIP																																		1					1
91	Q6PD62	CTR9						1	1	1			1	1	1	1			1			1		1												1					1						1	1	1
92	P52815	MRPL12											1	1					1																	1	1
93	Q9Y2W2	WBP11											1						1		1	1	1									1	1
94	Q8N0X7	SPG20											1	1	1				1																												1	1	1
95	Q7Z6E9	RBBP6	1	1																																1					1						1	1	1
96	O14979	HNRPDL											1	1					1
97	Q5JTH9	RRP12
98	O95197	RTN3
99	O43809	NUDT21											1	1	1		1		1			1	1	1
100	P61026	RAB10																																											1		1	1
101	Q7KZ85	SUPT6H	1			1		1	1	1			1	1	1	1			1			1									1					1					1		1	1			1	1
102	P62820	RAB1A																																		1					1					1	1
103	Q9UNH7	SNX6											1	1					1																	1					1				1
104	Q7L1Q6	BZW1											1	1					1
105	P41223	BUD31											1	1	1				1			1	1
106	P07996	THBS1											1																							1	1			1	1					1	1	1	1
107	P63092	GNAS	1										1																																		1	1	1
108	P30040	ERP29											1																							1		1			1
109	Q9NWU2	GID8
110	O76021	RSL1D1																																													1
111	Q9Y5L4	TIMM13																																		1
112	P16070	CD44											1																							1					1						1	1	1
113	Q07955	SRSF1											1	1	1		1		1			1	1	1							1												1	1			1
114	Q96KR1	ZFR																																													1
115	P38159	RBMX											1	1	1				1			1	1													1											1
116	O00151	PDLIM1											1	1					1
117	P61224	RAP1B																																													1
118	Q9GZT3	SLIRP											1	1					1								1																				1
119	P49458	SRP9											1																							1	1			1
120	Q9NVI1	FANCI	1				1																													1					1					1
121	P08574	CYC1
122	O75915	ARL6IP5																																		1					1
123	P16615	ATP2A2																																													1
124	P55145	MANF
125	P14866	HNRNPL											1						1			1	1
126	Q01780	EXOSC10											1						1	1	1						1					1	1	1
127	Q9UHR5	SAP30BP											1	1					1
128	Q99623	PHB2								1			1	1					1																	1					1		1			1	1	1	1
129	Q9H496	IFRG15
130	Q9UQE7	SMC3	1	1			1			1																										1					1	1				1	1
131	Q14839	CHD4						1	1	1			1	1	1				1																											1
132	Q9Y5X1	SNX9																																		1					1				1	1
133	O43390	HNRNPR											1						1			1	1				1			1						1	1			1
134	Q02809	PLOD1																																		1					1						1
135	Q08211	DHX9								1			1						1			1	1			1														1							1
136	O00541	PES1											1						1		1											1	1	1												1
137	Q99880	HIST1H2BL							1	1
138	O43660	PLRG1											1						1			1	1																							1
139	P07947	YES1											1	1	1				1																	1					1						1	1
140	Q9Y3B2	EXOSC1											1						1		1						1	1	1			1	1							1
141	Q9H307	PNN											1	1					1			1	1
142	Q9NZ01	TECR
143	Q01130	SRSF2											1	1	1		1		1			1	1	1							1												1	1
144	Q15942	ZYX
145	Q7L2J0	MEPCE											1	1	1				1		1																									1
146	P99999	CYCS											1	1	1				1																	1					1
147	Q9UQ35	SRRM2											1						1			1	1
148	P78347	GTF2I											1	1	1				1																												1	1
149	Q86UU0	BCL9L											1	1	1				1																												1	1	1
150	Q9NU22	MDN1																														1
151	Q9NYJ1	COA4
152	P61163	ACTR1A																																												1
153	P49411	TUFM											1																							1	1
154	P23284	PPIB																																		1		1	1		1						1	1	1
155	O75880	SCO1
156	P20700	LMNB1
157	P05204	HMGN2
158	P49585	PCYT1A
159	Q14683	SMC1A	1	1			1			1			1						1			1	1													1					1	1				1	1
160	Q5SRE5	NUP188											1					1	1		1										1					1					1	1	1	1		1
161	Q6P587	FAHD1
162	Q05519	SRSF11											1	1	1		1		1			1	1	1							1												1	1
163	O60216	RAD21	1			1	1						1	1	1				1																	1					1	1				1
164	P78527	PRKDC	1			1	1			1	1		1	1	1				1																	1					1					1	1	1	1
165	Q8WUM0	NUP133								1			1	1				1	1		1										1					1					1	1	1	1		1	1	1	1
166	Q7Z3K3	POGZ								1																																				1
167	Q10471	GALNT2																																		1					1
168	Q96T88	UHRF1	1				1	1	1	1			1	1	1			1	1																	1					1					1
169	P63165	SUMO1	1			1	1						1	1					1																	1					1	1					1
170	Q08945	SSRP1	1	1			1						1	1	1	1			1
171	Q15286	RAB35																																											1	1	1	1
172	P05114	HMGN1	1				1		1	1			1	1	1				1																												1	1	1
173	Q9NUP9	LIN7C																																													1
174	Q96TA1	FAM129B
175	P26358	DNMT1	1					1	1	1			1	1	1			1	1																	1					1						1	1	1
176	Q9H2P0	ADNP											1	1					1																	1					1						1	1
177	P23368	ME2
178	Q9NRL2	BAZ1A	1	1				1	1	1			1	1					1
179	O43852	CALU																																													1	1
180	Q1KMD3	HNRNPUL2
181	O43172	PRPF4											1						1			1	1
182	P49756	RBM25											1						1			1	1
183	P22087	FBL						1	1	1			1						1		1											1	1		1	1					1						1
184	O75475	PSIP1											1	1	1				1			1	1
185	Q53GS9	USP39											1						1			1	1													1					1					1
186	Q13868	EXOSC2											1						1		1						1	1	1			1	1	1	1					1
187	Q9UHX1	PUF60											1	1					1			1
188	Q9UKV3	ACIN1								1			1						1			1	1																								1	1	1
189	O75494	SRSF10											1	1					1			1	1		1						1												1	1
190	Q96RN5	MED15											1	1	1				1																												1
191	Q8N684	CPSF7											1	1	1		1		1			1	1	1
192	P35269	GTF2F1											1	1	1	1			1			1	1
193	Q15651	HMGN3						1	1	1			1	1	1				1
194	P82979	SARNP											1	1					1												1					1	1			1			1	1
195	Q9NPD3	EXOSC4	1										1						1	1	1						1	1	1			1	1	1	1					1
196	P06576	ATP5B																																													1	1
197	O76071	CIAO1											1	1	1				1
198	P30084	ECHS1
199	Q9BUF5	TUBB6																																		1		1
200	Q92733	PRCC																																												1
201	Q01081	U2AF1											1	1	1		1		1			1	1	1							1												1	1
202	P17844	DDX5											1	1	1				1			1	1																								1	1	1
203	P62304	SNRPE											1	1	1		1		1	1	1	1	1	1	1
204	Q27J81	INF2																																													1
205	Q00839	HNRNPU	1	1	1					1	1	1	1						1			1	1			1														1							1
206	Q66PJ3	ARL6IP4											1						1			1
207	Q92804	TAF15											1	1					1
208	P61769	B2M																																		1		1									1	1	1
209	O75607	NPM3											1	1					1		1											1	1
210	P29083	GTF2E1											1	1	1	1			1
211	Q15293	RCN1																																													1	1	1
212	O96019	ACTL6A	1			1	1	1	1	1			1	1	1				1																	1					1						1	1	1
213	P37108	SRP14											1																							1	1
214	Q15427	SF3B4											1						1			1	1
215	P62310	LSM3											1						1			1	1				1	1	1
216	Q08752	PPID											1	1	1				1																	1		1	1		1
217	P51149	RAB7A																																		1									1
218	Q9NVN8	GNL3L	1	1	1					1	1	1																				1				1					1
219	Q9UJU6	DBNL																																		1					1						1	1
220	Q15149	PLEC
221	P19388	POLR2E	1				1						1	1	1	1		1	1		1	1	1																								1
222	P14678	SNRPB											1	1	1		1		1	1	1	1	1	1	1											1					1
223	O14776	TCERG1											1	1	1				1
224	Q92879	CELF1											1					1	1			1	1													1	1			1							1
225	P68400	CSNK2A1								1			1	1					1																	1		1	1		1					1	1	1
226	P62318	SNRPD3											1	1	1		1		1	1	1	1	1	1	1											1					1
227	Q96D46	NMD3																														1											1	1
228	Q96EP5	DAZAP1											1						1			1	1																								1	1	1
229	P84090	ERH																																												1	1
230	Q13501	SQSTM1											1	1	1				1																	1					1				1		1
231	Q92769	HDAC2						1	1	1			1	1	1			1	1																	1					1					1	1	1	1
232	O95819	MAP4K4																																		1					1					1	1	1
233	P54819	AK2																																													1	1	1
234	P61604	HSPE1											1																							1		1									1
235	Q9H0D6	XRN2	1										1	1					1			1					1
236	Q9H0A0	NAT10	1	1	1					1	1	1	1						1		1											1	1
237	P08670	VIM											1																																		1	1	1
238	P62316	SNRPD2											1						1		1	1	1		1
239	P51151	RAB9A																																											1
240	P13667	PDIA4																																				1	1
241	P62314	SNRPD1											1						1		1	1	1		1
242	P42285	SKIV2L2											1						1		1	1	1				1					1	1	1
243	Q9NY12	GAR1	1	1	1					1	1	1	1						1		1											1	1
244	Q92620	DHX38											1	1	1		1		1			1	1	1							1												1	1
245	Q7RTV0	PHF5A											1	1					1			1	1
246	Q9Y3B4	SF3B14											1						1			1	1																								1
[truncated: 108 more columns]

## Sheet: Trn-SR
GO Terms for Trn-SR 2nd-Z-4% Cargoes		Term Type	BP
		Term ID	GO:0006259	GO:0006260	GO:0006261	GO:0044786	GO:0042023	GO:0006281	GO:0006302	GO:0006997	GO:0016568	GO:0016569	GO:0006325	GO:0051276	GO:0050000	GO:0032200	GO:0010467	GO:0006351	GO:0006366	GO:0006368	GO:0006369	GO:0016070	GO:0034660	GO:0008033	GO:0006364	GO:0006397	GO:0000398	GO:0000245	GO:0031124	GO:0006378	GO:0009451	GO:0090501	GO:0051028	GO:0042254	GO:0000470	GO:0042273	GO:0019538	GO:0006412	GO:0006457	GO:0061077	GO:0010608	GO:0036211	GO:0032446	GO:0016567	GO:0016925	GO:0008213	GO:0006479	GO:0016570	GO:0016574
Rank by 2nd Z-score (Trn-SR)		Term Name	DNA metabolic process	DNA replication	DNA-dependent DNA replication	Cell cycle DNA replication	DNA endoreduplication	DNA repair	Double-strand break repair	Nucleus organization	Chromatin modification	Covalent chromatin modification	Chromatin organization	Chromosome organization	Chromosome localization	Telomere organization	Gene expression	Transcription, DNA-templated	Transcription from RNA polymerase II promoter	Transcription elongation from RNA polymerase II promoter	Termination of RNA polymerase II transcription	RNA metabolic process	ncRNA metabolic process	tRNA processing	rRNA processing	mRNA processing	mRNA splicing, via spliceosome	Spliceosomal complex assembly	mRNA 3'-end processing	mRNA polyadenylation	RNA modification	RNA phosphodiester bond hydrolysis	mRNA transport	Ribosome biogenesis	Maturation of LSU-rRNA	Ribosomal large subunit biogenesis	Protein metabolic process	Translation	Protein folding	Chaperone-mediated protein folding	Posttranscriptional regulation of gene expression	Protein modification process	Protein modification by small protein conjugation	Protein ubiquitination	Protein sumoylation	Protein alkylation	Protein methylation	Histone modification	Histone ubiquitination
	Accession	Gene Name	36	15	9	6	3	21	8	7	23	16	26	42	5	7	162	88	55	10	11	147	34	10	19	61	37	6	20	10	7	7	19	23	4	6	98	19	11	7	16	72	25	18	8	7	7	15	6
1	Q10713	PMPCA															1																				1
2	Q9Y5L0	TNPO3
3	Q9UQ35	SRRM2															1					1				1	1
4	O00170	AIP															1					1															1		1
5	Q8IUD2	ERC1															1	1				1															1					1
6	Q9UJW0	DCTN4																																			1					1
7	Q12931	TRAP1															1																				1	1	1	1	1
8	Q01130	SRSF2															1	1	1		1	1				1	1		1				1
9	Q96FV9	THOC1	1	1	1												1	1				1				1							1
10	Q8IWS0	PHF6															1	1				1
11	Q5VTL8	PRPF38B															1					1				1
12	Q99661	KIF2C												1	1
13	P54886	ALDH18A1
14	Q8N7H5	PAF1									1	1	1	1			1	1	1	1		1				1			1	1							1					1	1	1		1	1	1	1
15	P56381	ATP5E
16	Q13247	SRSF6															1	1	1		1	1				1	1	1	1				1
17	Q6PL18	ATAD2									1		1	1			1	1	1			1
18	Q9UPN6	SCAF8															1					1				1
19	Q9BRL6	SRSF8															1					1				1
20	Q9Y305	ACOT9
21	P53350	PLK1								1				1			1	1	1			1															1					1	1	1
22	O00461	GOLIM4
23	Q14643	ITPR1
24	Q9NS87	KIF15
25	P31040	SDHA
26	Q16629	SRSF7															1	1	1		1	1				1	1		1				1
27	P14635	CCNB1								1	1	1	1	1	1		1					1				1			1								1					1	1	1				1
28	P40939	HADHA
29	Q9UPT8	ZC3H4
30	Q9BW92	TARS2															1					1	1														1	1
31	Q15773	MLF2
32	Q9H0D6	XRN2	1														1	1				1				1						1
33	Q9H9A5	CNOT10															1	1				1															1	1			1
34	O00264	PGRMC1
35	Q8N5M4	TTC9C																																			1		1	1		1
36	Q96GQ7	DDX27															1					1	1		1									1
37	P83916	CBX1															1	1				1
38	Q9Y2X9	ZNF281															1	1	1			1
39	Q9Y2W2	WBP11															1					1	1		1	1	1							1
40	Q14432	PDE3A
41	Q6DKI1	RPL7L1															1					1	1		1									1	1	1	1	1
42	O95707	POP4															1					1	1	1	1							1		1
43	P55265	ADAR															1					1	1			1					1						1	1			1	1
44	P12429	ANXA3	1														1	1				1
45	Q9Y5X3	SNX5
46	P53004	BLVRA
47	Q96C36	PYCR2
48	Q9NRG9	AAAS								1							1					1	1	1									1				1					1	1		1
49	Q96AE4	FUBP1															1	1	1			1
50	P49756	RBM25															1					1				1	1
51	P04183	TK1	1
52	Q4G0N4	NADKD1
53	Q13427	PPIG															1					1															1		1			1
54	Q9Y2V2	CARHSP1															1	1				1																			1
55	Q07955	SRSF1															1	1	1		1	1				1	1	1	1				1
56	Q8IY67	RAVER1															1					1				1	1
57	Q96C19	EFHD2
58	Q13596	SNX1																																			1
59	P47813	EIF1AX															1																				1	1
60	Q14676	MDC1	1					1	1																												1					1	1		1
61	Q7L2E3	DHX30															1					1												1		1
62	Q8N684	CPSF7															1	1	1		1	1				1	1		1
63	O14745	SLC9A3R1																																			1					1
64	P13073	COX4I1															1	1	1			1
65	Q9Y3Z3	SAMHD1
66	Q16637	SMN1															1	1				1	1			1	1	1
67	Q96CN7	ISOC1
68	P35269	GTF2F1															1	1	1	1		1				1	1
69	O00541	PES1								1							1					1	1		1									1	1	1
70	Q92620	DHX38															1	1	1		1	1				1	1		1				1
71	O75044	SRGAP2
72	Q13242	SRSF9															1	1	1		1	1				1	1	1	1				1
73	Q9UMY4	SNX12															1																				1
74	Q9H0A0	NAT10	1	1										1		1	1					1	1	1	1									1
75	Q04446	GBE1
76	Q14980	NUMA1								1
77	P19838	NFKB1															1	1	1			1	1														1					1
78	O60568	PLOD3																																			1					1
79	Q9BY42	RTFDC1
80	Q9Y3B7	MRPL11															1																	1		1	1	1
81	Q9Y6G9	DYNC1LI1												1																							1					1	1	1
82	P09525	ANXA4															1	1	1			1
83	Q9NR30	DDX21															1	1	1			1	1		1									1
84	P25325	MPST
85	Q9H0S4	DDX47															1					1	1		1	1								1
86	Q9Y5K6	CD2AP																																			1
87	O00422	SAP18											1	1			1	1	1			1				1	1
88	Q99798	ACO2
89	Q86YP4	GATAD2A	1														1	1	1			1
90	P84103	SRSF3															1	1	1		1	1				1	1		1				1
91	O14974	PPP1R12A															1	1	1			1															1					1
92	Q13555	CAMK2G																																			1					1
93	Q9H307	PNN															1	1				1				1	1
94	Q2TAY7	SMU1
95	P51153	RAB13
96	Q9Y2X3	NOP58															1					1	1		1						1			1			1					1	1		1
97	Q96RN5	MED15															1	1	1			1
98	P53999	SUB1															1	1	1			1
99	O60832	DKC1	1	1										1		1	1					1	1		1						1			1							1
100	Q69YN2	CWF19L1
101	Q9NWH9	SLTM															1	1				1
102	Q8N3U4	STAG2	1	1	1	1	1							1			1	1	1			1															1					1	1		1
103	O75694	NUP155								1							1					1	1	1									1				1					1	1		1
104	Q9NZ32	ACTR10
105	Q13428	TCOF1															1	1				1	1
106	P22087	FBL									1	1	1	1			1					1	1	1	1						1			1			1					1				1	1	1
107	Q15436	SEC23A																																			1					1
108	Q5T4S7	UBR4																																			1					1	1	1
109	O00410	IPO5
110	O60264	SMARCA5	1					1	1		1		1	1			1	1	1			1
111	Q6L8Q7	PDE12															1					1				1						1
112	Q14137	BOP1															1					1	1		1							1		1	1	1
113	Q9UHY7	ENOPH1
114	Q9H6F5	CCDC86
115	Q9HCC0	MCCC2
116	P17844	DDX5															1	1	1			1				1	1
117	Q6DD88	ATL3
118	Q8ND56	LSM14A															1																				1	1			1
119	P18887	XRCC1	1					1	1
120	O75607	NPM3															1	1				1	1		1									1
121	P00505	GOT2
122	Q6IBS0	TWF2
123	P18615	NELFE									1	1	1	1			1	1	1	1		1				1			1	1							1					1				1	1	1
124	Q96QC0	PPP1R10															1	1				1
125	Q16630	CPSF6															1					1				1			1	1
126	Q15032	R3HDM1
127	Q01415	GALK2
128	Q9H1E3	NUCKS1															1	1	1			1
129	P21964	COMT
130	Q3KQU3	MAP7D1
131	P52789	HK2
132	Q9UQ88	CDK11A															1	1				1				1											1					1
133	P42765	ACAA2
134	P13984	GTF2F2															1	1	1	1		1				1	1
135	Q9BUP3	HTATIP2															1	1	1			1
136	Q86VM9	ZC3H18
137	Q9NY93	DDX56															1					1	1		1									1
138	P13804	ETFA
139	Q9BVJ6	UTP14A															1					1	1		1									1
140	P12081	HARS															1					1	1														1	1
141	Q9NZ63	C9orf78
142	P27105	STOM
143	Q9NVM6	DNAJC17															1	1	1			1
144	Q96E11	MRRF															1																				1	1
145	Q13151	HNRNPA0															1					1				1	1														1
146	P51114	FXR1															1																				1	1			1
147	O43156	TTI1
148	Q92900	UPF1	1	1	1	1		1						1		1	1					1											1				1	1			1
149	Q10471	GALNT2																																			1					1
150	O60828	PQBP1															1	1				1				1	1
151	Q14181	POLA2	1	1	1	1								1		1
152	Q8WXX5	DNAJC9
153	Q14008	CKAP5
154	Q99459	CDC5L	1					1									1	1				1				1	1
155	Q16222	UAP1																																			1					1
156	Q9NXR7	BRE	1					1	1		1		1	1																							1					1
157	O43809	NUDT21															1	1	1		1	1				1	1		1	1
158	P35270	SPR
159	Q9NTZ6	RBM12
160	Q9NRL2	BAZ1A	1	1	1						1		1	1			1	1				1
161	P29372	MPG	1					1
162	Q14202	ZMYM3
163	Q96J01	THOC3															1					1				1							1
164	Q9P021	CRIPT
165	P35250	RFC2	1	1	1	1		1	1					1		1
166	Q9BZ01	FRG1B
167	Q13309	SKP2																																			1					1	1	1
168	Q8WWI1	LMO7																																			1					1	1	1
169	P16070	CD44															1																				1					1
170	Q92522	H1FX											1	1
171	Q86W42	THOC6															1					1				1							1
172	Q9H0U4	RAB1B																																			1					1
173	Q13144	EIF2B5															1																				1	1			1
174	Q9UGN5	PARP2	1	1	1			1														1															1					1
175	P78344	EIF4G2															1																				1	1			1
176	Q08945	SSRP1	1	1				1									1	1	1	1		1
177	P51812	RPS6KA3															1	1	1			1															1	1			1	1
178	P32780	GTF2H1	1					1									1	1	1	1		1				1											1					1
179	Q8WY36	BBX															1	1				1
180	P33981	TTK												1																							1					1	1	1
181	Q99714	HSD17B10															1					1	1	1							1
182	O43172	PRPF4															1					1				1	1
183	Q16643	DBN1
184	Q9H3U1	UNC45A																																					1	1
185	P05549	TFAP2A															1	1	1			1
186	Q9UMS4	PRPF19	1					1	1								1					1				1	1	1									1					1	1	1
187	Q13618	CUL3												1	1		1	1	1			1															1					1	1	1
188	Q14126	DSG2
189	Q6PD62	CTR9									1	1	1	1			1	1	1	1		1				1			1	1							1					1	1	1		1	1	1	1
190	P04181	OAT
191	Q9BZE4	GTPBP4	1	1																														1			1					1	1	1
192	Q96BP3	PPWD1															1					1				1	1										1		1			1
193	Q08752	PPID															1	1	1			1															1		1	1		1
194	P23919	DTYMK
195	P61081	UBE2M																																			1					1	1	1
196	Q9NVU0	POLR3E															1	1				1
197	Q96KP1	EXOC2																																			1
198	P25685	DNAJB1																																					1	1
199	Q9BTA9	WAC									1	1	1	1			1	1				1															1					1	1	1				1	1
200	Q14498	RBM39															1	1				1				1
201	P14550	AKR1A1
202	Q01081	U2AF1															1	1	1		1	1				1	1		1				1
203	Q6PJT7	ZC3H14															1					1				1			1	1											1
204	Q9UJU6	DBNL																																			1					1
205	O95249	GOSR1																																			1					1
206	Q6P1J9	CDC73									1	1	1	1			1	1	1	1		1				1			1	1							1					1	1	1				1	1
207	Q9NS86	LANCL2															1	1				1
208	Q9UQE7	SMC3	1	1	1	1	1	1						1																							1					1	1		1
209	Q13573	SNW1									1	1	1	1			1	1	1			1				1	1										1					1				1	1	1
210	Q71RC2	LARP4
211	P61019	RAB2A
212	O75152	ZC3H11A															1																1
213	Q8TAQ2	SMARCC2									1		1	1			1	1	1			1
214	Q8WWY3	PRPF31															1					1				1	1
215	P28702	RXRB															1	1	1			1
216	Q68E01	INTS3	1					1									1					1	1
217	Q9BT73	PSMG3
218	P09012	SNRPA															1					1				1	1
219	Q9H0C8	ILKAP																																			1					1
220	Q92841	DDX17															1	1	1			1
221	Q12789	GTF3C1															1	1				1	1
222	Q96PU8	QKI															1					1				1							1				1	1			1
223	Q9GZL7	WDR12															1					1	1		1									1	1	1
224	P40261	NNMT
225	Q5TFE4	NT5DC1
226	Q9NPJ3	ACOT13
227	P82979	SARNP															1	1				1											1				1	1			1
228	Q9UKV3	ACIN1												1			1					1				1	1
229	P47712	PLA2G4A
230	P62879	GNB2
231	Q8WYA6	CTNNBL1															1					1				1	1
232	Q00765	REEP5
233	Q9C0J8	WDR33	1					1									1					1				1			1	1		1
234	Q6UXN9	WDR82									1	1	1	1																							1					1				1	1	1
235	Q6P1N9	TATDN1	1
236	P50224	SULT1A3
237	Q86U70	LDB1									1	1	1	1			1	1	1			1															1					1						1
238	O75817	POP7															1					1	1	1								1
239	Q15059	BRD3									1		1	1			1	1	1			1
240	P08574	CYC1
241	Q06587	RING1									1	1	1	1			1	1				1															1					1	1	1	1			1	1
242	Q9HCD5	NCOA5															1	1				1
243	Q9BUI4	POLR3C															1	1				1
244	Q86UE8	TLK2									1		1	1																							1					1
245	Q9UBB5	MBD2									1	1	1	1			1	1	1			1
246	P61020	RAB5B
247	P08729	KRT7
248	Q9NYT0	PLEK2
249	Q96P11	NSUN5															1					1	1		1									1
250	P02545	LMNA								1							1	1	1			1															1
251	Q9NRX1	PNO1
252	Q00325	SLC25A3															1																				1	1
253	Q92733	PRCC
254	Q00688	FKBP3																																			1		1	1		1
255	Q9Y5P6	GMPPB																																			1					1
256	P38919	EIF4A3															1					1	1		1	1	1						1	1			1	1			1
257	P05787	KRT8
258	P40926	MDH2																																			1					1
259	Q13123	IK
260	P10809	HSPD1	1														1																				1		1	1
261	Q9Y5B9	SUPT16H	1	1				1					1	1			1	1	1	1		1
262	Q9BUQ8	DDX23															1					1				1	1	1
263	Q16537	PPP2R5E																																			1					1
264	P33240	CSTF2															1	1	1		1	1	1	1		1	1		1	1		1
265	Q9Y4W6	AFG3L2															1																				1
266	Q9UNX4	WDR3															1					1	1		1									1
267	P04179	SOD2															1	1	1			1
268	P52732	KIF11
269	Q0VDF9	HSPA14																																					1
270	P61158	ACTR3													1
271	P61964	WDR5									1	1	1	1			1	1				1															1					1				1	1	1
272	Q8WVC0	LEO1									1	1	1	1			1	1	1	1		1				1			1	1							1					1	1	1				1	1
273	P80303	NUCB2
274	Q9NY27	PPP4R2	1					1	1								1					1				1											1					1
275	Q9H4H8	FAM83D													1																						1					1
276	P17706	PTPN2																																			1					1
277	P25815	S100P
278	P53365	ARFIP2
279	Q9UKD2	MRTO4																																1
280	Q8NHH9	ATL2
281	Q96S44	TP53RK															1					1	1	1							1						1					1
282	Q9Y2T2	AP3M1
283	Q9UPN7	PPP6R1																																			1					1
284	O60547	GMDS																																			1					1
285	P09651	HNRNPA1	1	1										1		1	1					1				1	1						1
286	Q13907	IDI1
287	Q14683	SMC1A	1	1	1	1	1	1						1			1					1				1	1										1					1	1		1
288	Q9UBQ7	GRHPR
289	Q9Y6A4	C16orf80																																			1					1
290	P62140	PPP1CB															1																				1					1
291	Q6NZI2	PTRF															1	1				1
292	Q9UL25	RAB21
293	Q6DD87	ZNF787
294	P52272	HNRNPM															1					1				1	1
295	Q9H2U1	DHX36	1											1		1	1	1	1			1
296	O95573	ACSL3
297	Q14258	TRIM25	1					1									1	1				1															1					1	1	1
298	Q09472	EP300	1					1			1	1	1	1			1	1	1			1															1					1						1
299	Q9Y3C4	TPRKB															1					1	1	1							1
300	O60716	CTNND1															1	1				1
301	Q9Y5S2	CDC42BPB																																			1					1
302	P53041	PPP5C	1					1	1		1	1	1	1			1	1				1															1					1						1
303	Q92917	GPKOW
[truncated: 154 more columns]

## Sheet: Imp-4
GO Terms for Imp-4 2nd-Z-4% Cargoes		Term Type	BP
		Term ID	GO:0006259	GO:0006260	GO:0006261	GO:0006310	GO:0071103	GO:0006265	GO:0006323	GO:0006308	GO:0000737	GO:0006281	GO:0006289	GO:0006283	GO:0006302	GO:0051103	GO:0006997	GO:0006998	GO:0006333	GO:0016568	GO:0006325	GO:0051276	GO:0010833	GO:0032201	GO:0000722	GO:0010467	GO:0006351	GO:0006366	GO:0006367	GO:0006368	GO:0006369	GO:0016458	GO:0016070	GO:0034660	GO:0008033	GO:0006397	GO:0006370	GO:0000398	GO:0000380	GO:0000245	GO:0031124	GO:0006378	GO:0090501	GO:0051028	GO:0042254	GO:0006364	GO:0019538	GO:0010608	GO:0036211
Rank by 2nd Z-score (Imp-4)		Term Name	DNA metabolic process	DNA replication	DNA-dependent DNA replication	DNA recombination	DNA conformation change	DNA topological change	DNA packaging	DNA catabolic process	DNA catabolic process, endonucleolytic	DNA repair	Nucleotide-excision repair	Transcription-coupled nucleotide-excision repair	Double-strand break repair	DNA ligation involved in DNA repair	Nucleus organization	Nuclear envelope organization	Chromatin assembly or disassembly	Chromatin modification	Chromatin organization	Chromosome organization	Telomere maintenance via telomere lengthening	Telomere maintenance via semi-conservative replication	Telomere maintenance via recombination	Gene expression	Transcription, DNA-templated	Transcription from RNA polymerase II promoter	Transcription initiation from RNA polymerase II promoter	Transcription elongation from RNA polymerase II promoter	Termination of RNA polymerase II transcription	Gene silencing	RNA metabolic process	ncRNA metabolic process	tRNA processing	mRNA processing	7-methylguanosine mRNA capping	mRNA splicing, via spliceosome	Alternative mRNA splicing, via spliceosome	Spliceosomal complex assembly	mRNA 3'-end processing	mRNA polyadenylation	RNA phosphodiester bond hydrolysis	mRNA transport	Ribosome biogenesis	rRNA processing	Protein metabolic process	Posttranscriptional regulation of gene expression	Protein modification process
	Accession	Gene Name	33	11	6	14	11	3	8	5	4	20	7	5	8	3	10	6	8	13	21	35	6	4	4	141	78	48	11	7	12	8	129	30	8	57	4	49	6	11	14	6	6	10	15	13	70	12	46
1	P17480	UBTF																			1	1				1	1					1	1
2	Q8TEX9	IPO4
3	P02786	TFRC
4	Q05048	CSTF1																								1	1	1			1		1			1		1			1	1	1
5	Q9H0D6	XRN2	1							1																1	1						1			1							1
6	Q8IZL8	PELP1																								1	1	1					1
7	P25815	S100P
8	P17858	PFKL
9	Q9Y2Z4	YARS2																								1							1	1													1
10	Q14692	BMS1																																											1
11	Q8IUD2	ERC1																								1	1						1														1		1
12	Q13492	PICALM																								1	1						1														1
13	Q9NYF8	BCLAF1																								1	1						1
14	P49411	TUFM																								1																					1
15	P49790	NUP153															1	1								1						1	1	1	1									1			1		1
16	P18583	SON																								1							1			1
17	P38159	RBMX																								1	1	1					1			1		1	1								1
18	P55081	MFAP1
19	Q9NWH9	SLTM																								1	1						1
20	P04183	TK1	1
21	Q9NWB6	ARGLU1																								1	1						1
22	Q9BVJ6	UTP14A																								1							1	1											1	1
23	Q96CP2	FLYWCH2
24	O43823	AKAP8
25	P05187	ALPP
26	Q9H0G5	NSRP1																								1							1			1		1	1
27	Q9Y5J1	UTP18																								1							1	1											1	1
28	P08670	VIM																								1
29	O14975	SLC27A2
30	Q9P0L0	VAPA
31	P23246	SFPQ	1			1						1			1					1	1	1				1	1	1					1			1		1	1								1		1
32	Q96AY3	FKBP10																																													1		1
33	P40926	MDH2																																													1		1
34	P13804	ETFA
35	Q9NP97	DYNLRB1
36	Q9BUQ8	DDX23																								1							1			1		1		1
37	P47813	EIF1AX																								1																					1
38	Q14966	ZNF638																								1	1						1
39	Q5SSJ5	HP1BP3					1		1										1		1	1				1	1						1
40	Q5SRE5	NUP188															1	1								1						1	1	1	1									1			1		1
41	Q5JTH9	RRP12
42	P53350	PLK1															1	1				1				1	1	1					1														1		1
43	Q9Y3B4	SF3B6																								1							1			1		1
44	P20340	RAB6A																																													1		1
45	Q96S55	WRNIP1	1	1	1							1
46	P36954	POLR2I	1									1	1	1												1	1	1	1	1		1	1	1		1	1	1
47	Q9NTI5	PDS5B																				1
48	Q06124	PTPN11																																													1		1
49	Q9NX24	NHP2	1	1																		1	1			1							1	1											1	1
50	Q13151	HNRNPA0																								1							1			1		1										1
51	O00479	HMGN4
52	Q9UPT8	ZC3H4
53	O43156	TTI1
54	P20700	LMNB1
55	P18615	NELFE																		1	1	1				1	1	1		1			1			1					1	1					1		1
56	Q9NQW6	ANLN
57	Q8TAT6	NPLOC4	1									1																																			1
58	P45973	CBX5																								1	1						1
59	Q96P11	NSUN5																								1							1	1											1	1
60	Q8WW12	PCNP																																													1		1
61	Q00765	REEP5
62	P08729	KRT7
63	Q15233	NONO	1			1						1														1	1						1			1		1
64	P35269	GTF2F1																								1	1	1	1	1			1			1	1	1
65	Q9NRX4	PHPT1																																													1		1
66	Q9Y5M8	SRPRB																								1																					1
67	P38646	HSPA9																																													1
68	O43818	RRP9																								1							1	1											1	1
69	Q96PZ0	PUS7																								1							1	1	1
70	Q13573	SNW1																		1	1	1				1	1	1	1				1			1		1									1		1
71	Q5T1J5	CHCHD2P9
72	P53367	ARFIP1
73	P62306	SNRPF																								1	1	1			1		1	1		1		1			1
74	P61006	RAB8A
75	O00567	NOP56																								1							1	1											1	1
76	Q9H444	CHMP4B															1					1																									1
77	O95831	AIFM1	1				1		1	1	1											1				1																					1
78	Q13526	PIN1																								1	1	1					1														1		1
79	Q99541	PLIN2
80	Q9BQG0	MYBBP1A	1																							1	1						1
81	O75533	SF3B1																								1							1			1		1		1
82	Q9NQT5	EXOSC3	1			1																				1							1	1									1		1	1		1
83	Q92522	H1FX					1		1										1		1	1
84	P08579	SNRPB2																								1							1			1		1
85	O94826	TOMM70A																																													1
86	Q8WUA4	GTF3C2																								1	1						1	1
87	Q12830	BPTF																		1	1	1				1	1	1					1
88	Q9BSJ8	ESYT1
89	Q8NFW8	CMAS																																													1		1
90	O43852	CALU
91	Q04323	UBXN1																																													1		1
92	P34897	SHMT2																																													1		1
93	Q9BW27	NUP85															1	1								1	1					1	1	1	1									1			1		1
94	P43243	MATR3																								1																						1
95	P24539	ATP5F1
96	Q9NZZ3	CHMP5															1					1
97	Q96JB5	CDK5RAP3																								1	1	1					1														1		1
98	Q9NQ29	LUC7L																								1							1			1		1		1
99	Q9BTY7	HGH1
100	P68036	UBE2L3																								1	1						1														1		1
101	Q92733	PRCC
102	Q6NZI2	PTRF																								1	1						1
103	Q9Y2W1	THRAP3																								1	1	1	1				1			1		1	1									1
104	Q6PJT7	ZC3H14																								1							1			1					1	1						1
105	Q9H9F9	ACTR5	1			1						1			1											1	1						1
106	Q9H6F5	CCDC86
107	Q3KQU3	MAP7D1
108	P20674	COX5A																								1	1	1	1				1
109	P56270	MAZ																								1	1	1	1		1		1
110	Q92917	GPKOW
111	Q9H2H8	PPIL3																								1							1			1		1									1		1
112	P09661	SNRPA1																								1							1			1		1
113	Q86UU0	BCL9L																								1	1	1					1
114	Q12874	SF3A3																								1							1			1		1		1
115	Q1KMD3	HNRNPUL2
116	Q15286	RAB35
117	Q14978	NOLC1															1									1							1	1											1	1
118	Q15459	SF3A1																								1							1			1		1		1
119	P18754	RCC1
120	Q9H307	PNN																								1	1						1			1		1
121	Q13596	SNX1																																													1
122	O75400	PRPF40A																								1							1			1		1
123	P40937	RFC5	1	1	1	1						1	1	1	1							1	1	1	1
124	P13929	ENO3
125	Q9Y3U8	RPL36																								1							1														1
126	Q15428	SF3A2																								1							1			1		1		1
127	Q14320	FAM50A
128	Q5VTL8	PRPF38B																								1							1			1
129	Q08211	DHX9					1															1				1							1			1		1										1
130	P09429	HMGB1	1			1	1	1	1	1	1	1	1			1			1		1	1				1	1	1	1				1														1		1
131	P02794	FTH1
132	P09038	FGF2																								1	1	1					1														1		1
133	Q7RTV0	PHF5A																								1	1						1			1		1
134	Q16222	UAP1																																													1		1
135	P07741	APRT
136	O95232	LUC7L3																								1							1			1		1		1
137	Q00059	TFAM	1	1	1																					1	1	1					1
138	P62136	PPP1CA																								1																					1	1	1
139	P51970	NDUFA8
140	Q969G3	SMARCE1																	1	1	1	1				1	1	1					1
141	O76021	RSL1D1
142	Q96I15	SCLY
143	Q13435	SF3B2																								1							1			1		1
144	Q15014	MORF4L2	1									1								1	1	1				1	1	1				1	1														1		1
145	P06732	CKM
146	P42167	TMPO																								1	1						1
147	O75937	DNAJC8																								1							1			1		1
148	Q9NT62	ATG3																																													1		1
149	Q5RKV6	EXOSC6	1			1																				1							1	1											1	1		1
150	Q9Y5B9	SUPT16H	1	1								1							1		1	1				1	1	1		1			1
151	Q9GZL7	WDR12																								1							1	1											1	1
152	Q6VMQ6	ATF7IP	1																		1	1				1	1	1	1				1
153	Q13509	TUBB3																																													1
154	P14866	HNRNPL																								1							1			1		1
155	Q9NZ63	C9orf78
156	Q01130	SRSF2																								1	1	1			1		1			1		1	1		1			1
157	P36871	PGM1
158	Q9UEE9	CFDP1
159	Q9NR30	DDX21																								1	1	1					1	1											1	1
160	Q14498	RBM39																								1	1						1			1
161	P37108	SRP14																								1																					1
162	Q9NW82	WDR70
163	Q96CN7	ISOC1
164	P13861	PRKAR2A																																													1		1
165	P51149	RAB7A																																													1
166	P62314	SNRPD1																								1							1	1		1		1		1
167	P11387	TOP1	1	1			1	1												1	1	1				1																					1		1
168	P0C0S5	H2AFZ																			1	1				1	1	1				1	1
169	Q9UK59	DBR1																								1							1			1		1					1
170	Q08945	SSRP1	1	1								1														1	1	1		1			1
171	P31943	HNRNPH1																								1							1			1		1
172	Q15393	SF3B3																								1							1			1		1									1
173	O15347	HMGB3	1			1	1															1				1	1						1
174	A8MWD9	SNRPGP15
175	Q5VT52	RPRD2
176	P27695	APEX1	1	1	1	1						1										1	1	1	1	1	1						1										1					1
177	P09884	POLA1	1	1	1	1						1			1							1	1	1	1	1	1	1					1
178	Q9UKV3	ACIN1					1		1													1				1							1			1		1
179	Q8N726	CDKN2A	1				1		1	1	1								1	1	1	1				1	1	1					1	1											1	1	1		1
180	Q14202	ZMYM3
181	Q16181	SEPT7
182	Q96TA1	FAM129B
183	P55735	SEC13																																										1			1		1
184	P61081	UBE2M																																													1		1
185	P51003	PAPOLA																								1	1	1			1		1			1		1			1	1
186	Q9BY42	RTFDC1
187	O75607	NPM3																								1	1						1	1											1	1
188	P05556	ITGB1																																													1		1
189	Q96RS6	NUDCD1
190	Q99590	SCAF11																								1							1			1		1		1
191	P00505	GOT2
192	Q9H6Z4	RANBP3
193	P24928	POLR2A	1									1	1	1												1	1	1	1	1		1	1	1		1	1	1
194	P48729	CSNK1A1																																													1		1
195	O60264	SMARCA5	1				1		1			1			1				1	1	1	1				1	1	1					1
196	Q9UBP6	METTL1																								1							1	1	1
197	P99999	CYCS																								1	1	1	1				1														1		1
198	Q69YN2	CWF19L1
199	Q86X76	NIT1
200	Q16629	SRSF7																								1	1	1			1		1			1		1			1			1
201	Q16630	CPSF6																								1							1			1					1	1
202	Q13620	CUL4B	1									1	1	1						1	1	1																									1		1
203	P46779	RPL28																								1							1														1
204	P02545	LMNA															1	1								1	1	1					1														1
205	Q9Y3I0	RTCB																								1							1	1	1
206	Q9Y605	MRFAP1
207	P26583	HMGB2	1			1	1	1	1	1	1	1				1	1		1		1	1				1	1	1					1
208	P53582	METAP1																								1																					1	1	1
209	Q66PJ3	ARL6IP4																								1							1			1
210	P61106	RAB14
211	Q969Q0	RPL36AL																								1																					1
212	Q15651	HMGN3																		1	1	1				1	1	1					1
213	Q15149	PLEC
214	Q96EK5	KIF1BP
215	Q15427	SF3B4																								1							1			1		1
216	P53999	SUB1																								1	1	1					1
217	Q9NVN8	GNL3L	1	1																		1	1																						1		1		1
218	P61964	WDR5																		1	1	1				1	1						1														1		1
219	Q13616	CUL1																																													1		1
220	P26368	U2AF2																								1	1	1			1		1			1		1		1	1			1
221	Q05519	SRSF11																								1	1	1			1		1			1		1			1			1
222	P49903	SEPHS1																																													1		1
223	Q8TBC4	UBA3																								1	1						1														1		1
224	P63165	SUMO1	1			1						1	1		1		1	1								1	1						1														1		1
225	Q8WUU5	GATAD1																								1	1						1
226	Q9P258	RCC2
227	O43660	PLRG1																								1							1			1		1
228	P21399	ACO1																								1																					1	1
229	P13984	GTF2F2																								1	1	1	1	1			1			1	1	1
230	P62304	SNRPE																								1	1	1			1		1	1		1		1		1	1
231	Q10570	CPSF1																								1	1	1			1		1	1	1	1		1			1	1	1	1
232	O60216	RAD21	1			1						1			1											1	1	1					1														1		1
233	P51858	HDGF																								1	1	1					1														1
234	Q86UP2	KTN1
235	O00764	PDXK
236	Q9Y657	SPIN1																		1	1	1				1	1						1	1
237	Q9H974	QTRTD1																								1							1	1	1
238	P14678	SNRPB																								1	1	1			1		1	1		1		1			1						1		1
239	P68371	TUBB4B																																													1
240	O75390	CS
241	P18858	LIG1	1	1	1	1						1	1	1	1	1						1	1	1	1								1														1		1
242	O60828	PQBP1																								1	1						1			1		1	1
243	P84103	SRSF3																								1	1	1			1		1			1		1			1			1
244	Q04695	KRT17																								1																					1	1
245	O60488	ACSL4
[truncated: 115 more columns]

## Sheet: Imp-5
GO Terms for Imp-5 2nd-Z-4% Cargoes		Term Type	BP
		Term ID	GO:0006259	GO:0006260	GO:0016568	GO:0006325	GO:0051276	GO:0010467	GO:0006351	GO:0006366	GO:0006368	GO:0016070	GO:0010501	GO:0034660	GO:0008033	GO:0006397	GO:0000398	GO:0031124	GO:0006402	GO:0000288	GO:0000289	GO:0051028	GO:0042254	GO:0006364	GO:0019538	GO:0006412	GO:0006413	GO:0006414	GO:0006457	GO:0006458	GO:0061077	GO:0043623	GO:0051258	GO:0036211	GO:0006486	GO:0006913	GO:0051168	GO:0070585	GO:0048193	GO:0016197	GO:0008283	GO:0001775	GO:0007049	GO:0051301	GO:0044770	GO:0044839	GO:0000280	GO:0007059	GO:0030010
Rank by 2nd Z-score (Imp-5)		Term Name	DNA metabolic process	DNA replication	Chromatin modification	Chromatin organization	Chromosome organization	Gene expression	Transcription, DNA-templated	Transcription from RNA polymerase II promoter	Transcription elongation from RNA polymerase II promoter	RNA metabolic process	RNA secondary structure unwinding	ncRNA metabolic process	tRNA processing	mRNA processing	mRNA splicing, via spliceosome	mRNA 3'-end processing	mRNA catabolic process	Nuclear-transcribed mRNA catabolic process, deadenylation-dependent decay	Nuclear-transcribed mRNA poly(A) tail shortening	mRNA transport	Ribosome biogenesis	rRNA processing	Protein metabolic process	Translation	Translational initiation	Translational elongation	Protein folding	De novo protein folding	Chaperone-mediated protein folding	Cellular protein complex assembly	Protein polymerization	Protein modification process	Protein glycosylation	Nucleocytoplasmic transport	Nuclear export	Protein localization to mitochondrion	Golgi vesicle transport	Endosomal transport	Cell proliferation	Cell activation	Cell cycle	Cell division	Cell cycle phase transition	Cell cycle G2/M phase transition	Nuclear division	Chromosome segregation	Establishment of cell polarity
	Accession	Gene Name	26	13	15	19	29	138	61	38	6	107	7	22	7	30	20	7	10	5	4	7	20	14	116	43	19	9	13	5	5	16	11	59	13	16	9	8	15	13	27	18	45	22	12	8	15	10	6
1	O00410	IPO5
2	Q00610	CLTC																																					1	1			1				1
3	Q96E11	MRRF						1																	1	1
4	Q8TEX9	IPO4				1	1																									1				1
5	Q12931	TRAP1						1																	1	1			1		1
6	Q96FV9	THOC1	1	1				1	1			1				1						1														1	1					1	1
7	P49755	TMED10																							1							1		1	1				1
8	Q05639	EEF1A2						1																	1	1		1
9	O76087	GAGE7
10	P08559	PDHA1
11	P23511	NFYA						1	1	1		1																													1
12	Q9UMY4	SNX12						1																	1															1
13	P27105	STOM
14	Q8WXI7	MUC16
15	P40939	HADHA
16	Q8N3D4	EHBP1L1
17	Q9NY93	DDX56						1				1	1	1									1	1
18	P30084	ECHS1
19	P52732	KIF11																																									1	1			1	1
20	Q96AY3	FKBP10																							1				1		1			1
21	P31350	RRM2	1	1				1	1	1		1																															1		1
22	Q4G0N4	NADKD1
23	Q00341	HDLBP
24	O60869	EDF1						1	1			1
25	Q9UKM9	RALY						1				1				1	1
26	Q53FA7	TP53I3
27	Q14137	BOP1						1				1		1									1	1																	1		1
28	Q99798	ACO2
29	Q6PD62	CTR9			1	1	1	1	1	1	1	1				1		1							1									1
30	O75915	ARL6IP5																							1									1
31	Q14019	COTL1
32	Q9Y305	ACOT9
33	Q9BQG0	MYBBP1A	1					1	1			1																								1							1
34	Q9BRP8	WIBG						1				1							1						1	1
35	P30419	NMT1																							1									1				1
36	Q9UKG1	APPL1																																							1		1
37	Q02218	OGDH
38	Q9Y5J1	UTP18						1				1		1									1	1
39	Q16643	DBN1																																							1
40	P78344	EIF4G2						1																	1	1	1																1
41	Q9Y2W2	WBP11						1				1		1		1	1						1	1														1
42	P52789	HK2																																				1
43	P60842	EIF4A1						1				1	1						1	1	1				1	1	1
44	Q9BTC0	DIDO1						1	1			1
45	Q8N0X7	SPG20						1	1	1		1																																1
46	Q9H0A0	NAT10	1	1			1	1				1		1	1								1	1
47	O95295	SNAPIN																																						1
48	Q00688	FKBP3																							1				1		1			1
49	P32780	GTF2H1	1					1	1	1	1	1				1									1									1									1
50	P20962	PTMS	1	1
51	P18031	PTPN1																							1									1								1
52	Q8ND56	LSM14A						1																	1	1
53	O00264	PGRMC1
54	O95707	POP4						1				1		1	1								1	1
55	P68371	TUBB4B																							1				1	1													1		1	1
56	Q8WWI1	LMO7																							1									1
57	P68104	EEF1A1						1	1			1													1	1		1
58	Q8NE71	ABCF1						1																	1	1	1
59	P02795	MT2A
60	P09382	LGALS1																																								1
61	Q9UNI6	DUSP12																							1									1
62	Q14008	CKAP5																																									1	1	1	1	1
63	P07437	TUBB																																									1	1	1	1
64	Q9NRG9	AAAS						1				1		1	1							1			1									1		1							1
65	Q96SU4	OSBPL9
66	Q8N8S7	ENAH
67	Q9BQE3	TUBA1C																							1				1	1														1
68	O15145	ARPC3																														1	1
69	P62633	CNBP						1	1	1		1																													1
70	Q92945	KHSRP						1	1			1		1		1			1			1
71	P60953	CDC42	1	1				1																	1									1							1	1	1	1			1	1
72	P62826	RAN	1					1	1			1		1	1								1		1	1										1	1						1	1			1
73	Q99614	TTC1																											1
74	P80217	IFI35
75	O75391	SPAG7
76	P49411	TUFM						1																	1	1		1
77	Q14157	UBAP2L
78	P50238	CRIP1						1																																	1
79	P49770	EIF2B2						1																	1	1	1
80	O75531	BANF1	1																																								1
81	P84243	H3F3A	1			1	1	1	1			1													1
82	Q9Y3F4	STRAP						1	1	1		1				1	1								1									1							1
83	P61020	RAB5B																																						1
84	Q96FW1	OTUB1	1		1	1	1																		1									1
85	Q9UG63	ABCF2
86	Q9H0U4	RAB1B																							1									1	1				1
87	O60832	DKC1	1	1			1	1				1		1									1	1																	1
88	Q9Y295	DRG1						1	1			1
89	Q9H0G5	NSRP1						1				1				1	1																			1
90	O60244	MED14						1	1	1		1
91	Q96C19	EFHD2
92	Q969Z0	TBRG4																							1									1							1		1
93	Q13283	G3BP1					1
94	P55081	MFAP1
95	P53004	BLVRA
96	P47813	EIF1AX						1																	1	1	1
97	Q96QK1	VPS35																																						1
98	P53365	ARFIP2																														1	1
99	Q32MZ4	LRRFIP1						1	1	1		1
100	O15144	ARPC2																														1	1
101	Q8TC12	RDH11
102	Q9P021	CRIPT
103	P67809	YBX1						1	1	1		1				1	1																								1			1
104	P09622	DLD																							1
105	P61923	COPZ1																							1									1	1				1
106	Q9ULV4	CORO1C																							1									1
107	P55010	EIF5						1																	1	1	1
108	Q15436	SEC23A																							1									1	1				1
109	P14550	AKR1A1
110	Q86UE8	TLK2			1	1	1																		1									1									1					1
111	O95232	LUC7L3						1				1				1	1
112	P24534	EEF1B2						1																	1	1		1
113	P20290	BTF3						1	1	1		1
114	O60568	PLOD3																							1									1
115	P68366	TUBA4A																							1				1	1												1	1		1	1
116	Q05682	CALD1
117	Q7Z6I8	C5orf24
118	Q8WXI9	GATAD2B	1		1	1	1	1	1	1		1
119	P62879	GNB2
120	P61106	RAB14																																					1	1
121	P26641	EEF1G						1																	1	1		1
122	Q8NC51	SERBP1						1
123	P24752	ACAT1
124	Q14116	IL18						1																	1									1		1					1	1
125	Q9BY44	EIF2A						1	1	1		1											1		1	1	1							1
126	P43487	RANBP1																																									1	1			1
127	P50579	METAP2						1																	1									1
128	P23588	EIF4B						1				1							1	1	1				1	1	1
129	Q9Y2S6	TMA7
130	O94979	SEC31A																							1									1	1				1
131	Q3KQU3	MAP7D1
132	Q9Y657	SPIN1			1	1	1	1	1			1		1																													1
133	Q8N5M4	TTC9C																							1				1		1			1
134	Q92616	GCN1L1						1	1	1		1													1	1
135	Q9UQ88	CDK11A						1	1			1				1									1									1									1				1
136	P49591	SARS						1				1		1	1										1	1
137	Q13151	HNRNPA0						1				1				1	1
138	Q15056	EIF4H						1																	1	1	1
139	Q6PKG0	LARP1						1																	1	1	1														1
140	Q96EY7	PTCD3						1																	1	1	1	1
141	P61204	ARF3
142	Q8IY67	RAVER1						1				1				1	1
143	Q96HC4	PDLIM5
144	Q8WXX5	DNAJC9
145	Q8N684	CPSF7						1	1	1		1				1	1	1
146	P22087	FBL			1	1	1	1				1		1	1								1	1	1									1
147	P50552	VASP																														1	1
148	Q9H4A6	GOLPH3						1																	1														1		1								1
149	P59998	ARPC4																														1	1
150	Q9Y5X3	SNX5																																						1
151	P16989	CSDA						1	1	1		1													1	1
152	O00170	AIP						1				1													1				1									1
153	Q9UBB5	MBD2			1	1	1	1	1	1		1																				1									1
154	Q9BUQ8	DDX23						1				1	1			1	1
155	Q9NZ32	ACTR10
156	Q9NTI5	PDS5B					1																																		1		1	1			1	1
157	O00442	RTCA						1				1
158	P29692	EEF1D						1	1			1													1	1		1
159	Q14247	CTTN																														1	1
160	Q9BUF5	TUBB6																							1				1	1
161	P42771	CDKN2A	1		1	1	1	1	1	1		1		1									1	1	1									1		1	1	1			1	1	1	1	1	1
162	Q9NTK5	OLA1
163	P61024	CKS1B																							1									1							1		1	1	1
164	P06493	CDK1	1	1	1	1	1	1	1	1		1													1									1		1					1		1	1	1	1	1
165	Q9UHY7	ENOPH1
166	P18846	ATF1	1	1				1	1	1		1													1							1		1
167	P53597	SUCLG1
168	P17931	LGALS3						1				1				1																									1	1
169	Q9Y3C1	NOP16																					1
170	Q9H6F5	CCDC86
171	P63241	EIF5A						1														1			1	1		1						1		1	1				1
172	Q15366	PCBP2						1				1				1	1								1
173	O00571	DDX3X					1	1	1	1		1	1										1		1	1	1																1		1			1
174	P26196	DDX6						1				1	1						1	1					1	1
175	Q01081	U2AF1						1	1	1		1				1	1	1				1														1	1	1
176	O00625	PIR						1	1	1		1
177	O60563	CCNT1						1	1	1	1	1				1		1							1									1									1	1
178	O15143	ARPC1B																														1	1
179	P49773	HINT1						1	1			1
180	P41236	PPP1R2																							1									1
181	Q6PL18	ATAD2			1	1	1	1	1	1		1
182	Q8WVK2	SNRNP27						1				1				1	1
183	P61026	RAB10																																					1	1	1			1					1
184	Q8IWS0	PHF6						1	1			1
185	P23528	CFL1																							1									1								1	1	1					1
186	P48444	ARCN1																							1									1	1				1
187	P06732	CKM
188	Q7L014	DDX46						1				1	1			1	1
189	Q14498	RBM39						1	1			1				1
190	P55039	DRG2
191	P07737	PFN1						1	1	1		1																				1	1									1
192	Q9Y5X1	SNX9																							1									1						1			1	1			1
193	P27816	MAP4																																									1	1					1
194	O60841	EIF5B						1																	1	1	1
195	Q9H0D6	XRN2	1					1	1			1				1
196	P62820	RAB1A																							1							1		1	1				1				1
197	Q8TDN6	BRIX1																					1
198	P51148	RAB5C																																						1
199	Q14444	CAPRIN1						1																	1	1
200	Q9NSD9	FARSB						1				1		1											1	1
201	Q99880	HIST1H2BL				1	1
202	Q6IA86	ELP2				1	1	1	1	1	1	1
203	O15042	U2SURP						1				1
204	Q14847	LASP1
205	Q99829	CPNE1						1	1			1													1
206	P48047	ATP5O
207	Q13765	NACA						1	1	1		1													1	1															1
208	Q5T4S7	UBR4																							1									1
209	Q9BV86	NTMT1																							1									1									1					1
210	Q2NL82	TSR1																					1
211	P52597	HNRNPF						1				1				1	1
212	Q13630	TSTA3																							1									1	1
213	O14974	PPP1R12A						1	1	1		1													1									1		1							1		1	1	1
214	P12814	ACTN1										1																														1
215	P61160	ACTR2																														1	1										1	1			1	1
216	O14737	PDCD5						1																	1				1		1							1			1
217	O43795	MYO1B																																					1
218	P26368	U2AF2						1	1	1		1				1	1	1				1														1	1	1
219	Q96TA1	FAM129B
220	Q9Y678	COPG1																							1									1	1				1
221	Q16658	FSCN1																																							1								1
222	Q9C0C2	TNKS1BP1	1	1			1	1				1							1	1	1
223	P98179	RBM3						1				1													1	1
224	O00151	PDLIM1						1	1			1
225	P30046	DDT
226	Q15072	ZNF146						1	1			1
227	Q9NWH9	SLTM						1	1			1
228	P60709	ACTB			1	1	1	1																	1				1	1												1
229	Q9UKS6	PACSIN3																							1
230	Q15907	RAB11B																																						1
231	Q9GZR7	DDX24										1	1
232	Q8IYW5	RNF168	1		1	1	1	1	1	1	1	1													1									1								1
233	Q14331	FRG1						1				1		1		1	1						1	1
234	Q71RC2	LARP4
235	P21291	CSRP1																																								1
236	P62837	UBE2D2						1	1	1		1													1									1
237	O00299	CLIC1																																								1	1
238	Q9Y5S2	CDC42BPB																							1									1
239	Q9UNX4	WDR3						1				1		1									1	1
240	Q8TBB5	KLHDC4
241	Q9BVC5	C2orf49						1				1		1	1
242	P13489	RNH1										1							1
243	Q9Y6G9	DYNC1LI1					1																		1									1									1	1	1		1	1
244	Q8WWY3	PRPF31						1				1				1	1
245	Q04637	EIF4G1						1				1							1	1	1				1	1	1
246	P30041	PRDX6
247	Q7KZF4	SND1						1	1			1
248	P60228	EIF3E						1				1							1						1	1	1
249	P35579	MYH9						1																	1																	1	1	1					1
250	P61006	RAB8A																																					1				1		1	1
251	P50395	GDI2
252	Q15004	KIAA0101	1	1																																							1
253	O43809	NUDT21						1	1	1		1				1	1	1
254	Q96IJ6	GMPPA																							1									1	1
255	O75436	VPS26A																																						1
256	Q9BVQ7	SPATA5L1
257	Q92900	UPF1	1	1			1	1				1							1			1			1	1										1	1						1
258	O95801	TTC4
259	O15371	EIF3D						1																	1	1	1
260	P60981	DSTN
261	O15372	EIF3H						1																	1	1	1
262	P53621	COPA																							1									1	1				1
263	O75083	WDR1																																								1
264	O76003	GLRX3
265	Q99613	EIF3C						1																	1	1	1
266	O43707	ACTN4										1																														1
267	Q16222	UAP1																							1									1	1
268	P68032	ACTC1						1
269	P10599	TXN						1	1	1		1													1				1					1		1	1				1
270	Q9NRL2	BAZ1A	1	1	1	1	1	1	1			1
271	O95155	UBE4B																							1									1
272	P23193	TCEA1	1					1	1	1	1	1													1	1		1
273	Q9UQ80	PA2G4						1	1			1		1									1	1	1	1															1		1
274	Q9H814	PHAX						1				1		1		1	1																			1	1
275	Q99541	PLIN2
276	Q9P2E9	RRBP1						1																	1	1
277	Q9Y262	EIF3L						1																	1	1	1
278	P35659	DEK	1		1	1	1	1	1	1		1
279	Q99547	MPHOSPH6						1				1		1									1	1
280	P08670	VIM						1
281	Q8TBF8	FAM81A
282	Q96KQ7	EHMT2	1	1	1	1	1	1	1	1		1													1									1									1				1	1
283	O15305	PMM2																							1									1	1
284	P09525	ANXA4						1	1	1		1
285	Q9UL25	RAB21																																						1
286	P11908	PRPS2
287	Q9Y6E2	BZW2
288	P30086	PEBP1																							1									1
289	Q16630	CPSF6						1				1				1		1
290	P61158	ACTR3																														1	1										1	1			1	1
291	Q9HCC0	MCCC2
292	P07108	DBI
293	P08758	ANXA5
294	Q9Y237	PIN4						1				1		1									1	1	1									1
295	P16949	STMN1																														1	1										1
296	P27708	CAD																							1									1
297	P54727	RAD23B	1				1																		1
298	P30085	CMPK1
299	Q8NHH9	ATL2
300	P60891	PRPS1
301	P41227	NAA10					1																		1									1
[truncated: 138 more columns]

## Sheet: Imp-7
GO Terms for Imp-7 2nd-Z-4% Cargoes		Term Type	BP
		Term ID	GO:0006259	GO:0006310	GO:0071103	GO:0032392	GO:0006323	GO:0006997	GO:0006998	GO:0006333	GO:0031497	GO:0051276	GO:0010467	GO:0006351	GO:0006366	GO:0006369	GO:0098781	GO:0016458	GO:0031047	GO:0016070	GO:0034660	GO:0008033	GO:0006397	GO:0000395	GO:0000398	GO:0000245	GO:0031124	GO:0006378	GO:0048255	GO:0006402	GO:0006379	GO:0051028	GO:0042254	GO:0009303	GO:0006364	GO:0042273	GO:0019538	GO:0006412	GO:0006413	GO:0006414	GO:0006415	GO:0006457	GO:0036211	GO:0006508	GO:0006913	GO:0051170	GO:0006606	GO:0051168	GO:0072657
Rank by 2nd Z-score (Imp-7)		Term Name	DNA metabolic process	DNA recombination	DNA conformation change	DNA geometric change	DNA packaging	Nucleus organization	Nuclear envelope organization	Chromatin assembly or disassembly	Chromatin assembly	Chromosome organization	Gene expression	Transcription, DNA-templated	Transcription from RNA polymerase II promoter	Termination of RNA polymerase II transcription	ncRNA transcription	Gene silencing	Gene silencing by RNA	RNA metabolic process	ncRNA metabolic process	tRNA processing	mRNA processing	mRNA 5'-splice site recognition	mRNA splicing, via spliceosome	Spliceosomal complex assembly	mRNA 3'-end processing	mRNA polyadenylation	mRNA stabilization	mRNA catabolic process	mRNA cleavage	mRNA transport	Ribosome biogenesis	rRNA transcription	rRNA processing	Ribosomal large subunit biogenesis	Protein metabolic process	Translation	Translational initiation	Translational elongation	Translational termination	Protein folding	Protein modification process	Proteolysis	Nucleocytoplasmic transport	Nuclear import	Protein import into nucleus	Nuclear export	Protein localization to membrane
	Accession	Gene Name	20	9	12	7	8	8	6	8	7	26	169	80	41	17	5	11	9	147	27	10	78	3	61	15	21	9	5	12	4	22	15	5	9	6	92	30	14	12	11	10	47	25	25	10	9	16	21
1	Q9Y5M8	SRPRB											1																								1	1											1
2	Q12931	TRAP1											1																								1	1				1
3	Q14126	DSG2
4	P06732	CKM
5	Q9BW27	NUP85						1	1				1	1				1	1	1	1	1										1					1						1		1	1	1	1
6	Q96AT1	KIAA1143
7	Q96A33	CCDC47																																			1							1
8	P42704	LRPPRC											1	1						1												1					1	1
9	Q6DD87	ZNF787
10	Q9H9Y6	POLR1B						1					1	1			1			1	1													1
11	P54886	ALDH18A1
12	Q92621	NUP205						1	1				1					1	1	1	1	1										1					1						1		1	1	1
13	Q07065	CKAP4																																			1
14	P38646	HSPA9																																			1					1			1			1
15	P25490	YY1	1	1								1	1	1	1					1
16	P08670	VIM											1
17	Q9NYU2	UGGT1																																			1					1	1
18	Q9HA77	CARS2											1							1	1																1	1
19	P25705	ATP5A1
20	Q4U2R6	MRPL51											1																								1	1	1	1	1
21	P30048	PRDX3											1	1						1																	1						1	1
22	Q13423	NNT
23	P26583	HMGB2	1	1	1	1	1	1		1	1	1	1	1	1					1
24	P14923	JUP											1	1						1																									1	1	1		1
25	Q9BS26	ERP44																																			1					1
26	P10809	HSPD1	1	1									1																								1					1		1
27	P35658	NUP214						1	1				1					1	1	1	1	1										1					1						1		1	1	1	1
28	P36776	LONP1	1																																		1							1
29	O43670	ZNF207										1	1	1						1																	1						1	1
30	Q9BQG0	MYBBP1A	1										1	1						1																									1
31	Q9H583	HEATR1											1	1						1	1												1		1
32	Q6UN15	FIP1L1											1	1	1	1				1			1		1		1					1													1			1
33	P22695	UQCRC2											1																								1							1
34	Q9BYG3	MKI67IP											1	1			1			1	1													1			1						1
35	Q9BXW7	CECR5
36	Q16836	HADH
37	P62805	HIST1H4A	1	1	1		1			1	1	1	1	1				1	1	1																	1						1
38	Q8IXT5	RBM12B
39	P34897	SHMT2																																			1						1	1
40	O75694	NUP155						1	1				1					1	1	1	1	1										1					1						1		1	1	1	1
41	Q9Y2W1	THRAP3											1	1	1					1			1		1				1	1
42	Q9UHQ9	CYB5R1
43	Q9BWM7	SFXN3
44	Q96AY3	FKBP10																																			1					1	1
45	Q9Y2X9	ZNF281											1	1	1					1
46	Q96ST2	IWS1										1	1	1						1			1									1					1						1		1			1
47	Q9BUJ2	HNRNPUL1											1	1						1			1		1
48	Q10570	CPSF1											1	1	1	1				1	1	1	1		1		1	1			1	1													1			1
49	P32004	L1CAM
50	P49411	TUFM											1																								1	1		1
51	P49748	ACADVL																																			1
52	P35268	RPL22											1							1										1							1	1	1	1	1								1
53	O15347	HMGB3	1	1	1	1						1	1	1						1
54	Q9NWH9	SLTM											1	1						1
55	P17844	DDX5											1	1	1					1			1		1
56	O00264	PGRMC1
57	Q9H4A6	GOLPH3											1																								1												1
58	Q15717	ELAVL1											1																1								1	1
59	Q86UP2	KTN1
60	Q9BTD8	RBM42											1							1			1		1
61	Q9UJS0	SLC25A13											1																								1	1
62	Q9NW13	RBM28											1							1			1
63	O43684	BUB3										1																									1						1	1
64	O60568	PLOD3																																			1						1
65	Q15072	ZNF146											1	1						1
66	Q27J81	INF2
67	P51114	FXR1											1																								1	1
68	Q01130	SRSF2											1	1	1	1				1			1		1		1					1													1			1
69	Q92945	KHSRP											1	1						1	1		1							1		1
70	P31040	SDHA
71	Q8NI27	THOC2											1							1			1									1													1			1
72	P00505	GOT2
73	P61026	RAB10																																															1
74	P23246	SFPQ	1	1								1	1	1	1					1			1		1												1						1
75	Q9Y305	ACOT9
76	P48506	GCLC											1	1						1																	1						1	1
77	Q14061	COX17
78	Q14155	ARHGEF7
79	O00410	IPO5																																											1	1	1
80	Q9BTC0	DIDO1											1	1						1
81	Q05519	SRSF11											1	1	1	1				1			1		1		1					1													1			1
82	O15460	P4HA2																																			1						1
83	P17028	ZNF24											1	1						1
84	Q9Y383	LUC7L2											1							1			1		1	1
85	O75146	HIP1R
86	Q16629	SRSF7											1	1	1	1				1			1		1		1					1													1			1
87	Q96CT7	CCDC124
88	P14174	MIF											1																								1						1
89	P55809	OXCT1
90	P06576	ATP5B
91	O00622	CYR61											1	1	1					1																	1						1	1
92	Q13151	HNRNPA0											1							1			1		1				1
93	Q12789	GTF3C1											1	1			1			1	1													1
94	P98179	RBM3											1					1	1	1																	1	1
95	P54819	AK2
96	Q9UQR1	ZNF148											1	1	1					1
97	O14975	SLC27A2
98	O60231	DHX16											1							1			1
99	Q01081	U2AF1											1	1	1	1				1			1		1		1					1													1			1
100	P27105	STOM																																															1
101	Q9Y5Q9	GTF3C3											1	1			1			1	1													1
102	Q92522	H1FX			1		1			1	1	1
103	Q9BUP3	HTATIP2											1	1	1					1																									1	1
104	O95758	PTBP3											1							1			1		1
105	Q07955	SRSF1											1	1	1	1				1			1	1	1	1	1					1													1			1
106	Q96L92	SNX27
107	Q9NQ29	LUC7L											1							1			1		1	1
108	Q9NRZ9	HELLS	1		1		1			1	1	1	1	1				1		1
109	P55145	MANF
110	P84103	SRSF3											1	1	1	1				1			1		1		1					1													1			1
111	P26368	U2AF2											1	1	1	1				1			1		1	1	1					1													1			1
112	Q3KQU3	MAP7D1
113	Q9Y3D6	FIS1																																			1							1					1
114	P55081	MFAP1
115	O95232	LUC7L3											1							1			1		1	1
116	P08174	CD55											1																								1						1	1
117	P09012	SNRPA											1							1			1		1
118	O75521	ECI2
119	Q9H4F8	SMOC1
120	Q14498	RBM39											1	1						1			1
121	Q9Y281	CFL2
122	A6NCE7	MAP1LC3B2
123	Q12849	GRSF1											1							1	1	1	1				1	1
124	Q9Y3C1	NOP16																															1			1
125	Q16630	CPSF6											1							1			1				1	1
126	Q99714	HSD17B10											1							1	1	1
127	Q9UNN5	FAF1																																			1						1	1	1	1	1
128	Q9NYF8	BCLAF1											1	1						1
129	O94874	UFL1											1	1						1																	1						1	1
130	P09234	SNRPC											1							1			1	1	1	1
131	Q13492	PICALM											1	1						1																	1							1
132	P56270	MAZ											1	1	1	1				1
133	Q9NY12	GAR1	1									1	1							1	1												1		1
134	Q10471	GALNT2																																			1						1
135	Q9Y2S7	POLDIP2
136	Q15286	RAB35
137	O00479	HMGN4
138	P80723	BASP1											1	1						1
139	Q5VV52	ZNF691											1	1						1
140	Q16666	IFI16											1	1	1					1																	1							1
141	P61006	RAB8A																																															1
142	P62820	RAB1A																																			1						1
143	Q86V81	ALYREF
144	O60488	ACSL4
145	P51151	RAB9A
146	Q9UKV3	ACIN1			1		1					1	1							1			1		1
147	Q9H0U4	RAB1B																																			1						1
148	Q7L4I2	RSRC2
149	Q7KZF4	SND1											1	1				1	1	1
150	O75390	CS
151	P62873	GNB1
152	Q14444	CAPRIN1											1																								1	1
153	Q96SI9	STRBP
154	Q96HE7	ERO1L											1																								1					1	1
155	P09429	HMGB1	1	1	1	1	1			1	1	1	1	1	1					1																	1						1	1
156	P42765	ACAA2
157	Q7KZ85	SUPT6H	1	1								1	1	1	1					1			1									1					1						1		1			1
158	Q8N684	CPSF7											1	1	1	1				1			1		1		1
159	Q6PD62	CTR9										1	1	1	1					1			1				1	1									1						1
160	P07919	UQCRH
161	P53992	SEC24C																																			1						1
162	P62750	RPL23A											1							1										1			1			1	1	1	1	1	1								1
163	Q92879	CELF1											1					1	1	1			1		1	1											1	1
164	O00567	NOP56											1							1	1												1		1
165	P51991	HNRNPA3											1							1			1		1							1
166	Q99459	CDC5L	1										1	1						1			1		1
167	Q9P2E9	RRBP1											1																								1	1
168	Q99623	PHB2										1	1	1						1																	1						1		1	1	1
169	P80303	NUCB2
170	O94913	PCF11											1	1	1	1				1			1		1		1	1			1
171	P62306	SNRPF											1	1	1	1				1	1		1		1		1
172	Q5T8P6	RBM26											1							1			1														1						1
173	O94906	PRPF6											1	1	1					1			1		1	1
174	Q2TAY7	SMU1
175	P42766	RPL35											1							1	1									1			1		1	1	1	1	1	1	1								1
176	Q7RTV0	PHF5A											1	1						1			1		1
177	Q15428	SF3A2											1							1			1		1	1
178	P33240	CSTF2											1	1	1	1				1	1	1	1		1		1	1			1
179	P53350	PLK1						1	1			1	1	1	1					1																	1						1	1
180	P61106	RAB14
181	Q9Y3B4	SF3B14											1							1			1		1
182	Q9BWF3	RBM4											1					1	1	1			1		1												1	1	1				1		1
183	P08579	SNRPB2											1							1			1		1
184	Q9NTU7	CBLN4
185	P67812	SEC11A											1																								1	1						1					1
186	P35637	FUS											1							1			1		1
187	P40939	HADHA
188	Q9H0A0	NAT10	1									1	1							1	1	1											1		1
189	O00159	MYO1C											1																			1																	1
190	Q9Y295	DRG1											1	1						1
191	P08729	KRT7
192	P61254	RPL26											1							1	1									1			1		1	1	1	1	1	1	1								1
193	P51153	RAB13																																															1
194	P19367	HK1
195	Q9BT73	PSMG3
196	P53007	SLC25A1											1																								1	1
197	P51149	RAB7A																																			1
198	Q9Y5V0	ZNF706											1	1						1																	1	1
199	Q9UI30	TRMT112											1							1	1	1											1		1		1						1
200	P07339	CTSD																																			1							1
201	P53999	SUB1											1	1	1					1
202	Q9UKM9	RALY											1							1			1		1
203	P55854	SUMO3	1																																		1						1	1
204	Q9NWB6	ARGLU1											1	1						1
205	Q96EP5	DAZAP1											1							1			1		1
206	Q15459	SF3A1											1							1			1		1	1
207	P09661	SNRPA1											1							1			1		1
208	Q66PJ3	ARL6IP4											1							1			1
209	Q14696	MESDC2																																								1
210	A8MWD9	#VALUE!
211	O75533	SF3B1											1							1			1		1	1
212	Q13283	G3BP1			1	1						1
213	O43852	CALU
214	Q9UKS6	PACSIN3																																			1							1
215	Q96KR1	ZFR
216	P15924	DSP																																			1						1
217	Q9BWJ5	SF3B5											1							1			1		1
218	Q8NC51	SERBP1											1
219	Q9NYV4	CDK12											1	1	1					1			1														1						1
220	P20700	LMNB1
221	P31942	HNRNPH3											1							1			1		1
222	Q12874	SF3A3											1							1			1		1	1
223	O15511	ARPC5
224	P35269	GTF2F1											1	1	1					1			1		1
225	Q08211	DHX9			1	1						1	1							1			1		1				1
226	O75182	SIN3B										1	1	1	1					1																	1						1
227	O14979	HNRPDL											1	1						1
228	P14678	SNRPB											1	1	1	1				1	1		1		1		1										1						1
229	P40926	MDH2																																			1						1
230	Q99590	SCAF11											1							1			1		1	1
231	Q15004	KIAA0101	1
232	Q9C0J8	WDR33	1										1							1			1				1	1			1
233	P31943	HNRNPH1											1							1			1		1
234	Q8IY67	RAVER1											1							1			1		1
235	P61019	RAB2A
236	Q15233	NONO	1	1									1	1						1			1		1
237	P09382	LGALS1
238	Q9UKI8	TLK1								1		1																									1						1
239	P40429	RPL13A											1							1										1							1	1	1	1	1								1
240	P61224	RAP1B
241	P18754	RCC1
242	Q9NP79	VTA1
243	Q9NXV6	CDKN2AIP
244	P26373	RPL13											1							1										1							1	1	1	1	1								1
245	O00571	DDX3X			1	1						1	1	1	1					1													1				1	1	1					1
246	Q9UL25	RAB21
247	P63092	GNAS	1										1
248	Q07020	RPL18											1							1										1							1	1	1	1	1								1
249	Q9UQ35	SRRM2											1							1			1		1
250	Q6XQN6	NAPRT1
251	P42166	TMPO											1	1						1
252	P49756	RBM25											1							1			1		1
253	Q13636	RAB31																																															1
254	O43809	NUDT21											1	1	1	1				1			1		1		1	1
255	Q9H0U9	TSPYL1			1		1			1	1	1
256	Q9UN86	G3BP2																														1													1	1	1
257	Q96PU8	QKI											1							1			1									1					1	1
258	Q96P11	NSUN5											1							1	1												1		1
259	Q6PJT7	ZC3H14											1							1			1				1	1
260	P62318	SNRPD3											1	1	1	1				1	1		1		1	1	1										1						1
261	P84090	ERH
262	Q9Y6G9	DYNC1LI1										1																									1						1	1
263	Q13428	TCOF1											1	1			1			1	1													1
264	P61604	HSPE1											1																								1					1		1
265	P51970	NDUFA8
266	P09038	FGF2											1	1	1					1																	1						1
267	Q13148	TARDBP						1	1				1	1	1					1			1						1								1						1
268	P52597	HNRNPF											1							1			1		1
269	O43447	PPIH											1							1			1		1												1					1	1
270	Q14160	SCRIB
271	Q96GM8	TOE1																		1
272	Q9UBQ5	EIF3K											1																								1	1	1
273	P62888	RPL30											1							1										1							1	1	1	1	1								1
274	Q8WVK2	SNRNP27											1							1			1		1
275	P48634	PRRC2A
276	Q8TDN6	BRIX1																															1			1
277	O76021	RSL1D1
278	P49207	RPL34											1							1										1			1				1	1	1	1	1								1
279	O75475	PSIP1											1	1	1					1			1	1	1	1
280	P63173	RPL38											1							1										1			1			1	1	1	1	1	1								1
281	P57678	GEMIN4											1							1	1		1		1								1		1
282	Q13435	SF3B2											1							1			1		1
283	P51148	RAB5C
284	P17096	HMGA1	1		1	1	1			1	1	1	1	1	1			1		1
[truncated: 137 more columns]

## Sheet: Imp-8
GO Terms for Imp-8 2nd-Z-4% Cargoes		Term Type	BP
		Term ID	GO:0006259	GO:0071103	GO:0010467	GO:0006351	GO:0006366	GO:0006369	GO:0016070	GO:0034660	GO:0006397	GO:0000398	GO:0000245	GO:0000387	GO:0031124	GO:0006378	GO:0010501	GO:0048255	GO:0006402	GO:0051028	GO:0042254	GO:0006364	GO:0000470	GO:0042273	GO:0042255	GO:0019538	GO:0006412	GO:0006413	GO:0006414	GO:0006415	GO:0002181	GO:0002183	GO:0036211	GO:0006913	GO:0051168	GO:0072657	GO:0070972	GO:0048193	GO:0016197	GO:0008283	GO:0007049	GO:0051301	GO:0032502	GO:0048731	GO:0048513	GO:0009888	GO:0030154	GO:0001649	GO:0007399
Rank by 2nd Z-score (Imp-8)		Term Name	DNA metabolic process	DNA conformation change	Gene expression	Transcription, DNA-templated	Transcription from RNA polymerase II promoter	Termination of RNA polymerase II transcription	RNA metabolic process	ncRNA metabolic process	mRNA processing	mRNA splicing, via spliceosome	Spliceosomal complex assembly	Spliceosomal snRNP assembly	mRNA 3'-end processing	mRNA polyadenylation	RNA secondary structure unwinding	mRNA stabilization	mRNA catabolic process	mRNA transport	Ribosome biogenesis	rRNA processing	Maturation of LSU-rRNA	Ribosomal large subunit biogenesis	Ribosome assembly	Protein metabolic process	Translation	Translational initiation	Translational elongation	Translational termination	Cytoplasmic translation	Cytoplasmic translational initiation	Protein modification process	Nucleocytoplasmic transport	Nuclear export	Protein localization to membrane	Protein localization to endoplasmic reticulum	Golgi vesicle transport	Endosomal transport	Cell proliferation	Cell cycle	Cell division	Developmental process	System development	Animal organ development	Tissue development	Cell differentiation	Osteoblast differentiation	Nervous system development
	Accession	Gene Name	17	9	183	63	34	14	153	23	73	61	15	5	17	5	8	4	34	15	26	14	3	13	8	110	62	42	32	29	13	3	40	15	11	43	33	12	17	29	32	16	92	57	42	28	61	11	34
1	P63010	AP2B1																																									1	1	1		1		1
2	Q13823	GNL2																			1
3	Q9UKM9	RALY			1				1		1	1
4	Q6DD87	ZNF787
5	Q9BQG0	MYBBP1A	1		1	1			1																									1							1		1				1	1
6	P02786	TFRC																																									1	1	1		1
7	P62805	HIST1H4A	1	1	1	1			1																	1							1								1		1	1	1		1
8	P42765	ACAA2
9	P24752	ACAT1																																									1	1	1	1			1
10	P34897	SHMT2																								1							1							1
11	P67812	SEC11A			1																					1	1									1	1
12	O00567	NOP56			1				1	1											1	1
13	P25705	ATP5A1																																						1			1
14	P54886	ALDH18A1
15	Q9NYU2	UGGT1																								1							1
16	Q5JRX3	PITRM1			1																					1
17	P10809	HSPD1	1		1																					1														1			1	1
18	P36776	LONP1	1																							1																	1
19	Q9NR30	DDX21			1	1	1		1	1							1				1	1																					1				1	1
20	P08670	VIM			1																																						1	1	1	1	1		1
21	P23511	NFYA			1	1	1		1																															1			1				1
22	Q9NZM1	MYOF
23	O95825	CRYZL1
24	P23246	SFPQ	1		1	1	1		1		1	1														1							1								1
25	Q13423	NNT
26	Q9Y5M8	SRPRB			1																					1	1									1	1
27	Q9Y305	ACOT9
28	P00505	GOT2
29	Q8IX12	CCAR1			1	1			1		1	1																												1	1
30	Q14137	BOP1			1				1	1											1	1	1	1																1	1
31	O60568	PLOD3																								1							1										1	1	1	1	1		1
32	Q5VV52	ZNF691			1	1			1
33	Q9UHQ9	CYB5R1
34	P56270	MAZ			1	1	1	1	1
35	P04179	SOD2			1	1	1		1																															1			1	1	1		1		1
36	P53007	SLC25A1			1																					1	1
37	Q9Y3C1	NOP16																			1			1
38	Q14126	DSG2																																									1	1	1	1
39	O15042	U2SURP			1				1
40	P62913	RPL11			1				1	1									1		1	1		1	1	1	1	1	1	1						1	1
41	Q12931	TRAP1			1																					1	1
42	P35268	RPL22			1				1										1							1	1	1	1	1	1					1	1						1	1	1		1
43	Q96L92	SNX27																																					1
44	P38646	HSPA9																								1								1	1
45	P42166	TMPO			1	1			1
46	O15460	P4HA2																								1							1
47	Q02818	NUCB1
48	P16435	POR																								1							1							1			1	1	1	1	1
49	Q00610	CLTC																																		1		1	1		1		1				1	1
50	Q9BUJ2	HNRNPUL1			1	1			1		1	1
51	Q92945	KHSRP			1	1			1	1	1								1	1
52	P30048	PRDX3			1	1			1																	1							1							1			1	1	1		1
53	P00367	GLUD1																																									1	1	1				1
54	Q9UQ35	SRRM2			1				1		1	1
55	Q96AT1	KIAA1143
56	Q07065	CKAP4																								1
57	P08195	SLC3A2
58	Q9Y2Q9	MRPS28			1																					1	1	1	1	1
59	Q96SI9	STRBP																																									1				1
60	P17028	ZNF24			1	1			1																																		1	1					1
61	P61006	RAB8A																																		1		1			1		1	1			1		1
62	P51153	RAB13																																		1			1				1	1	1	1	1		1
63	Q96AY3	FKBP10																								1							1
64	Q8TDN6	BRIX1																			1			1	1
65	Q3KQU3	MAP7D1
66	P51114	FXR1			1																					1	1																1	1	1		1
67	P62820	RAB1A																								1							1					1			1		1				1
68	Q9BZJ0	CRNKL1			1				1		1	1	1
69	Q13636	RAB31																																		1		1
70	Q9NWH9	SLTM			1	1			1
71	Q15233	NONO	1		1	1			1		1	1
72	P27105	STOM																																		1
73	Q16836	HADH
74	Q9UQR1	ZNF148			1	1	1		1																																		1	1	1				1
75	Q15072	ZNF146			1	1			1
76	P38159	RBMX			1	1	1		1		1	1														1																	1				1	1
77	P98179	RBM3			1				1																	1	1
78	Q9UL25	RAB21																																					1				1	1			1		1
79	Q6PD62	CTR9			1	1	1		1		1				1	1										1							1										1	1	1	1	1
80	Q9HCS7	XAB2	1		1	1			1		1	1																															1	1	1				1
81	Q05519	SRSF11			1	1	1	1	1		1	1			1					1														1	1
82	P04899	GNAI2																								1							1							1	1	1
83	O14556	GAPDHS																																									1				1
84	Q07955	SRSF1			1	1	1	1	1		1	1	1		1					1														1	1								1
85	Q01130	SRSF2			1	1	1	1	1		1	1			1					1														1	1
86	Q9BV38	WDR18																																									1
87	O75694	NUP155			1				1	1										1						1							1	1	1						1
88	Q9NVT9	ARMC1
89	P61106	RAB14																																				1	1				1
90	P62873	GNB1																																						1			1	1	1
91	Q9Y3D6	FIS1																								1										1							1
92	Q9BTC0	DIDO1			1	1			1
93	P61026	RAB10																																		1	1	1	1	1		1	1	1		1	1		1
94	Q9C0J8	WDR33	1		1				1		1				1	1
95	Q92522	H1FX		1
96	Q16630	CPSF6			1				1		1				1	1
97	Q9BTD8	RBM42			1				1		1	1
98	P55809	OXCT1																																									1	1	1	1			1
99	P61019	RAB2A																																							1
100	O75691	UTP20			1				1	1											1	1																		1
101	Q9H0U4	RAB1B																								1							1					1
102	Q12788	TBL3			1				1	1											1	1
103	P09382	LGALS1																																									1	1	1		1		1
104	Q9Y2S6	TMA7
105	Q71RC2	LARP4																																									1
106	Q9H4A6	GOLPH3			1																					1										1		1		1
107	Q96EP5	DAZAP1			1				1		1	1																												1			1	1	1		1
108	Q9Y2W1	THRAP3			1	1	1		1		1	1						1	1
109	P11387	TOP1	1	1	1																					1							1									1	1
110	P61024	CKS1B																								1							1							1	1	1
111	Q7KZF4	SND1			1	1			1																																		1				1	1
112	P58546	MTPN			1	1			1																	1	1																1	1	1	1	1		1
113	Q9BXS6	NUSAP1		1																																					1	1
114	P05556	ITGB1																								1							1			1				1	1		1	1	1	1	1		1
115	O75400	PRPF40A			1				1		1	1																													1	1	1
116	Q7RTV0	PHF5A			1	1			1		1	1
117	P51148	RAB5C																																					1
118	P84103	SRSF3			1	1	1	1	1		1	1			1					1														1	1
119	Q96DI7	SNRNP40			1				1		1	1
120	Q16629	SRSF7			1	1	1	1	1		1	1			1					1														1	1
121	Q9Y5X1	SNX9																								1							1						1		1	1
122	Q9UNX3	RPL26L1			1				1										1		1			1		1	1	1	1	1	1					1	1
123	P49207	RPL34			1				1										1		1					1	1	1	1	1						1	1
124	Q9Y383	LUC7L2			1				1		1	1	1
125	P19367	HK1
126	P18074	ERCC2	1	1	1	1	1		1		1															1							1							1	1	1	1	1	1	1	1		1
127	O00571	DDX3X		1	1	1	1		1								1				1				1	1	1	1													1
128	P26368	U2AF2			1	1	1	1	1		1	1	1		1					1														1	1
129	Q5T4S7	UBR4																								1							1
130	Q8NHQ9	DDX55							1								1
131	Q8ND56	LSM14A			1																					1	1																1
132	Q00765	REEP5
133	Q8N0X7	SPG20			1	1	1		1																																	1	1	1	1	1	1		1
134	O95232	LUC7L3			1				1		1	1	1
135	Q9NQ29	LUC7L			1				1		1	1	1																														1	1	1	1
136	P62888	RPL30			1				1										1							1	1	1	1	1						1	1
137	Q9NY93	DDX56			1				1	1							1				1	1
138	Q96CT7	CCDC124																																							1	1
139	Q8WWY3	PRPF31			1				1		1	1		1
140	Q9NWB6	ARGLU1			1	1			1
141	Q96I25	RBM17			1				1		1	1
142	P09012	SNRPA			1				1		1	1
143	P14678	SNRPB			1	1	1	1	1	1	1	1		1	1											1							1
144	Q96MU7	YTHDC1			1				1		1	1	1
145	P57081	WDR4			1				1	1
146	P07996	THBS1			1																					1	1						1							1	1		1	1	1	1
147	O75533	SF3B1			1				1		1	1	1																														1
148	Q01081	U2AF1			1	1	1	1	1		1	1			1					1														1	1
149	Q9UKV3	ACIN1		1	1				1		1	1																															1	1	1		1
150	P18846	ATF1	1		1	1	1		1																	1							1										1	1			1		1
151	P42704	LRPPRC			1	1			1											1						1	1
152	P20700	LMNB1
153	Q9Y262	EIF3L			1																					1	1	1
154	P50914	RPL14			1				1	1									1		1	1		1		1	1	1	1	1						1	1
155	Q9BVP2	GNL3			1	1	1		1												1																			1
156	Q5VTL8	PRPF38B			1				1		1
157	Q08211	DHX9		1	1				1		1	1						1																									1				1	1
158	Q14240	EIF4A2			1				1								1		1							1	1	1
159	Q9NSE4	IARS2			1				1	1																1	1		1
160	P39023	RPL3			1				1										1		1			1	1	1	1	1	1	1						1	1
161	Q9NY12	GAR1	1		1				1	1											1	1
162	P62318	SNRPD3			1	1	1	1	1	1	1	1	1	1	1											1							1
163	P51991	HNRNPA3			1				1		1	1								1
164	Q9BPX5	ARPC5L
165	O43809	NUDT21			1	1	1	1	1		1	1			1	1
166	O43795	MYO1B																																				1
167	Q7L014	DDX46			1				1		1	1					1
168	P42766	RPL35			1				1	1									1		1	1	1	1		1	1	1	1	1						1	1
169	Q15286	RAB35																																				1	1		1	1	1	1			1		1
170	P09234	SNRPC			1				1		1	1	1	1
171	P49756	RBM25			1				1		1	1
172	P26196	DDX6			1				1								1		1							1	1																1	1			1		1
173	P38117	ETFB
174	P49748	ACADVL																								1																	1			1	1
175	Q9UKY7	CDV3																																						1
176	Q9NYV4	CDK12			1	1	1		1		1															1							1								1
177	P31942	HNRNPH3			1				1		1	1																															1			1	1
178	P47813	EIF1AX			1																					1	1	1
179	Q9UHB6	LIMA1
180	Q14008	CKAP5																																							1	1
181	Q9UBQ5	EIF3K			1																					1	1	1
182	O94874	UFL1			1	1			1																	1							1							1			1	1			1	1	1
183	Q9UIG0	BAZ1B	1		1	1			1																	1							1										1	1	1
184	P53582	METAP1			1																					1	1						1
185	P26373	RPL13			1				1										1							1	1	1	1	1						1	1
186	P51151	RAB9A																																					1
187	Q9Y6D9	MAD1L1																								1							1							1	1	1	1	1	1
188	Q9Y3B4	SF3B14			1				1		1	1																															1
189	Q14444	CAPRIN1			1																					1	1																1	1			1		1
190	O75531	BANF1	1																																						1
191	Q15717	ELAVL1			1													1								1	1																1				1
192	P61353	RPL27			1				1										1							1	1	1	1	1						1	1
193	Q13283	G3BP1		1
194	P40926	MDH2																								1							1
195	P32969	RPL9			1				1										1							1	1	1	1	1	1					1	1
196	O00159	MYO1C			1															1																1
197	O60488	ACSL4																																									1	1			1		1
198	P51149	RAB7A																								1													1
199	P62910	RPL32			1				1										1							1	1	1	1	1						1	1
200	O15372	EIF3H			1																					1	1	1
201	Q12849	GRSF1			1				1	1	1				1	1																											1			1
202	Q9UN86	G3BP2																		1														1
203	Q14152	EIF3A			1																					1	1	1			1	1
204	A6NCE7	MAP1LC3B2
205	Q5T8P6	RBM26			1				1		1															1							1
206	Q13435	SF3B2			1				1		1	1
207	Q9BWJ5	SF3B5			1				1		1	1
208	Q8N684	CPSF7			1	1	1	1	1		1	1			1
209	Q15428	SF3A2			1				1		1	1	1																														1	1			1		1
210	P63173	RPL38			1				1										1		1			1	1	1	1	1	1	1						1	1						1	1	1	1
211	Q9BQ67	GRWD1
212	Q66PJ3	ARL6IP4			1				1		1
213	Q13492	PICALM			1	1			1																	1													1	1			1	1	1		1		1
214	Q8NC51	SERBP1			1
215	Q7Z6I8	C5orf24
216	P08579	SNRPB2			1				1		1	1
217	Q15427	SF3B4			1				1		1	1
218	Q05639	EEF1A2			1																					1	1		1
219	P18077	RPL35A			1				1	1									1		1	1		1		1	1	1	1	1	1					1	1
220	Q8WWI1	LMO7																								1							1
221	P53999	SUB1			1	1	1		1
222	P62750	RPL23A			1				1										1		1			1	1	1	1	1	1	1						1	1			1
223	Q9BSJ8	ESYT1
224	Q14498	RBM39			1	1			1		1
225	P25490	YY1	1		1	1	1		1																																		1	1	1		1
226	P60866	RPS20			1				1										1							1	1	1	1	1						1	1
227	P18124	RPL7			1				1	1									1		1	1	1	1		1	1	1	1	1	1					1	1
228	Q15459	SF3A1			1				1		1	1	1
229	P61254	RPL26			1				1	1									1		1	1		1		1	1	1	1	1	1					1	1
230	P52597	HNRNPF			1				1		1	1
231	P09661	SNRPA1			1				1		1	1
232	P23588	EIF4B			1				1										1							1	1	1
233	Q9UMY4	SNX12			1																					1													1
234	P80723	BASP1			1	1			1																																		1	1	1	1	1		1
235	P47914	RPL29			1				1										1							1	1	1	1	1	1					1	1						1
236	P84090	ERH																																							1		1				1	1
237	P62424	RPL7A			1				1										1		1					1	1	1	1	1						1	1
238	P61513	RPL37A			1				1										1							1	1	1	1	1						1	1
239	O60869	EDF1			1	1			1																																		1			1	1
240	Q99590	SCAF11			1				1		1	1	1
241	P62906	RPL10A			1				1										1							1	1	1	1	1						1	1
242	Q8WVK2	SNRNP27			1				1		1	1
243	Q12874	SF3A3			1				1		1	1	1
244	P61313	RPL15			1				1										1							1	1	1	1	1	1					1	1
245	Q8NI27	THOC2			1				1		1									1														1	1								1	1			1		1
246	P62917	RPL8			1				1										1							1	1	1	1	1	1					1	1
247	P60228	EIF3E			1				1										1							1	1	1
248	P07942	LAMB1																																						1			1	1	1	1	1		1
249	A8MWD9	#VALUE!
250	P62854	RPS26			1				1										1							1	1	1	1	1						1	1
251	Q86U42	PABPN1			1	1	1	1	1		1	1			1					1														1	1
252	P46782	RPS5			1				1										1		1				1	1	1	1	1	1						1	1
253	O75223	GGCT
254	P78344	EIF4G2			1																					1	1	1													1
255	Q9P0L0	VAPA																																			1	1					1	1			1		1
256	P61020	RAB5B																																					1
257	Q13501	SQSTM1			1	1	1		1																	1							1						1				1				1
258	Q9ULV4	CORO1C																								1							1										1	1	1	1	1
259	P67809	YBX1			1	1	1		1		1	1						1																						1		1	1				1
260	Q53GS9	USP39			1				1		1	1	1													1							1								1	1
261	P13861	PRKAR2A																								1							1
262	P17844	DDX5			1	1	1		1		1	1					1																										1	1	1	1	1	1
263	Q9P021	CRIPT																																		1
264	P68032	ACTC1			1																																						1	1	1	1	1
265	Q86V81	ALYREF
266	P62306	SNRPF			1	1	1	1	1	1	1	1		1	1
267	O75935	DCTN3																								1							1					1			1	1
268	Q9H9Y6	POLR1B			1	1			1	1																																	1
269	O75182	SIN3B			1	1	1		1																	1							1										1	1	1	1
270	Q15004	KIAA0101	1																																						1
271	O75937	DNAJC8			1				1		1	1
272	Q9Y3A5	SBDS			1				1	1											1	1			1															1	1		1	1	1	1
273	Q9NYF8	BCLAF1			1	1			1
274	P46776	RPL27A			1				1										1							1	1	1	1	1						1	1
275	P06732	CKM
276	O76021	RSL1D1																																									1				1	1
277	P68104	EEF1A1			1	1			1																	1	1		1
278	Q8NE71	ABCF1			1																					1	1	1
279	Q9UHB9	SRP68			1																					1	1									1	1
280	P55795	HNRNPH2			1				1		1	1
281	O15371	EIF3D			1																					1	1	1			1	1
282	Q15907	RAB11B																																		1			1
283	Q9P2E9	RRBP1			1																					1	1																1				1	1
284	P28482	MAPK1	1		1	1			1																	1	1						1	1					1	1	1		1	1	1	1	1		1
285	P09543	CNP																																									1	1	1		1		1
286	P62899	RPL31			1				1										1							1	1	1	1	1	1					1	1
287	Q9UK76	HN1
288	O15143	ARPC1B																																									1	1			1		1
289	Q9BWF3	RBM4			1				1		1	1														1	1	1			1	1	1	1									1				1
[truncated: 115 more columns]

## Sheet: Imp-9
GO Terms for Imp-9 2nd-Z-4% Cargoes		Term Type	BP
		Term ID	GO:0006259	GO:0006260	GO:0006310	GO:0071103	GO:0006323	GO:0006281	GO:0034728	GO:0006333	GO:0016568	GO:0006325	GO:0051276	GO:0032200	GO:0010467	GO:0006351	GO:0006366	GO:0006369	GO:0016458	GO:0016070	GO:0000959	GO:0034660	GO:0006397	GO:0000398	GO:0045292	GO:0008334	GO:0000245	GO:0031124	GO:0006378	GO:0010501	GO:0006402	GO:0051028	GO:0042254	GO:0006364	GO:0042273	GO:0042255	GO:0019538	GO:0006412	GO:0006413	GO:0006414	GO:0006415	GO:0002181	GO:0006457	GO:0061077	GO:0036211	GO:0016925	GO:0006913	GO:0051168	GO:0072657
Rank by 2nd Z-score (Imp-9)		Term Name	DNA metabolic process	DNA replication	DNA recombination	DNA conformation change	DNA packaging	DNA repair	Nucleosome organization	Chromatin assembly or disassembly	Chromatin modification	Chromatin organization	Chromosome organization	Telomere organization	Gene expression	Transcription, DNA-templated	Transcription from RNA polymerase II promoter	termination of RNA polymerase II transcription	Gene silencing	RNA metabolic process	Mitochondrial RNA metabolic process	ncRNA metabolic process	mRNA processing	mRNA splicing, via spliceosome	mRNA cis splicing, via spliceosome	Histone mRNA metabolic process	Spliceosomal complex assembly	mRNA 3'-end processing	mRNA polyadenylation	RNA secondary structure unwinding	mRNA catabolic process	mRNA transport	Ribosome biogenesis	rRNA processing	Ribosomal large subunit biogenesis	Ribosome assembly	Protein metabolic process	Translation	Translational initiation	Translational elongation	Translational termination	Cytoplasmic translation	Protein folding	Chaperone-mediated protein folding	Protein modification process	Protein sumoylation	Nucleocytoplasmic transport	Nuclear export	Protein localization to membrane
	Accession	Gene Name	30	13	9	10	8	14	7	8	14	22	33	7	182	81	53	17	9	166	4	31	78	68	4	4	19	18	4	6	23	18	26	20	10	7	88	36	25	26	24	5	9	5	42	9	24	16	33
1	P24752	ACAT1
2	Q15424	SAFB										1	1		1	1	1			1			1
3	P0C0S5	H2AFZ										1	1		1	1	1		1	1
4	Q96AE4	FUBP1													1	1	1			1
5	P38159	RBMX													1	1	1			1			1	1													1
6	P23511	NFYA													1	1	1			1
7	O94906	PRPF6													1	1	1			1			1	1			1
8	P52815	MRPL12													1	1				1	1																1	1	1	1	1
9	Q9BUJ2	HNRNPUL1													1	1				1			1	1
10	O43837	IDH3B
11	Q96P70	IPO9
12	Q9Y5B9	SUPT16H	1	1				1	1	1		1	1		1	1	1			1
13	O00622	CYR61													1	1	1			1																	1								1
14	P11388	TOP2A	1		1	1	1						1		1	1	1			1																	1								1	1
15	Q8WUY1	THEM6
16	Q9UKM9	RALY													1					1			1	1
17	Q15233	NONO	1		1			1							1	1				1			1	1
18	O75390	CS
19	P10809	HSPD1	1		1										1																						1						1	1
20	P36776	LONP1	1																																		1
21	Q9Y2X3	NOP58													1					1		1											1	1			1								1	1	1
22	P06576	ATP5B
23	Q92841	DDX17													1	1	1			1										1
24	P09038	FGF2													1	1	1			1																	1								1
25	Q7L2E3	DHX30													1					1													1		1	1
26	P13804	ETFA
27	P48960	CD97
28	P19105	MYL12A																																															1
29	P69905	HBA1
30	P14923	JUP													1	1				1																											1		1
31	P38646	HSPA9																																			1						1				1	1
32	P42704	LRPPRC													1	1				1	1											1					1	1
33	P49411	TUFM													1																						1	1		1
34	Q32P28	LEPRE1																																			1						1	1	1
35	Q96PK6	RBM14	1	1	1			1			1	1	1		1	1	1			1																	1								1
36	Q9H2P0	ADNP													1	1				1																	1								1
37	Q9GZT3	SLIRP													1	1				1	1
38	Q9H0D6	XRN2	1												1	1				1			1
39	P11387	TOP1	1	1		1					1	1	1		1																						1								1	1
40	P26440	IVD
41	Q9BTD8	RBM42													1					1			1	1
42	Q92621	NUP205													1				1	1		1										1					1								1	1	1
43	Q9NZM1	MYOF
44	P00505	GOT2
45	P02786	TFRC
46	Q14966	ZNF638													1	1				1
47	P34897	SHMT2																																			1								1
48	Q01081	U2AF1													1	1	1	1		1			1	1				1				1															1	1
49	P84103	SRSF3													1	1	1	1		1			1	1				1				1															1	1
50	Q96GQ7	DDX27													1					1		1								1			1	1
51	Q00059	TFAM	1	1											1	1	1			1	1
52	O94826	TOMM70A																																			1
53	Q9Y697	NFS1																																			1								1
54	Q9NYF8	BCLAF1													1	1				1
55	Q03164	KMT2A	1								1	1	1		1	1	1			1																	1								1
56	Q10570	CPSF1													1	1	1	1		1		1	1	1				1	1			1															1	1
57	Q96P11	NSUN5													1					1		1											1	1
58	Q14004	CDK13													1	1	1			1			1	1													1								1
59	O14975	SLC27A2
60	Q9BTZ2	DHRS4
61	P30622	CLIP1																																															1
62	P11177	PDHB
63	P62805	HIST1H4A	1		1	1	1	1	1	1	1	1	1	1	1	1			1	1																	1								1
64	P38117	ETFB
65	P51114	FXR1													1																						1	1
66	Q14498	RBM39													1	1				1			1
67	P17844	DDX5													1	1	1			1			1	1						1
68	P43243	MATR3													1
69	Q9NWB6	ARGLU1													1	1				1
70	Q9NY12	GAR1	1	1									1	1	1					1		1											1	1
71	Q04837	SSBP1	1	1
72	Q9BUQ8	DDX23													1					1			1	1	1		1			1
73	P08174	CD55													1																						1								1
74	O95163	IKBKAP										1	1		1	1	1			1																	1								1
75	Q6DD87	ZNF787
76	P26368	U2AF2													1	1	1	1		1			1	1			1	1				1															1	1
77	Q9NQ29	LUC7L													1					1			1	1			1
78	P56270	MAZ													1	1	1	1		1
79	Q14690	PDCD11													1					1		1	1										1	1
80	P39656	DDOST													1																						1	1							1				1
81	P62081	RPS7													1					1		1									1		1	1			1	1	1	1	1								1
82	P11233	RALA
83	O60568	PLOD3																																			1								1
84	Q14692	BMS1																															1			1
85	Q16629	SRSF7													1	1	1	1		1			1	1				1				1															1	1
86	Q7L014	DDX46													1					1			1	1						1
87	Q9H6R4	NOL6													1					1		1											1	1													1	1
88	Q8WY36	BBX													1	1				1
89	Q8N684	CPSF7													1	1	1	1		1			1	1				1
90	P30084	ECHS1
91	P78406	RAE1													1				1	1		1										1					1								1	1	1	1
92	Q86V81	ALYREF
93	Q05519	SRSF11													1	1	1	1		1			1	1				1				1															1	1
94	P21964	COMT
95	O75400	PRPF40A													1					1			1	1
96	P78347	GTF2I													1	1	1			1
97	Q96AY3	FKBP10																																			1						1	1	1
98	Q9NYV4	CDK12													1	1	1			1			1														1								1
99	Q12931	TRAP1													1																						1	1					1	1
100	P08670	VIM													1
101	Q9BTC0	DIDO1													1	1				1
102	Q9Y383	LUC7L2													1					1			1	1			1
103	P49756	RBM25													1					1			1	1
104	P42766	RPL35													1					1		1									1		1	1	1		1	1	1	1	1								1
105	Q13151	HNRNPA0													1					1			1	1
106	Q92522	H1FX				1	1		1	1		1	1
107	P35659	DEK	1					1			1	1	1		1	1	1			1
108	P34913	EPHX2													1
109	Q8WUU5	GATAD1													1	1				1
110	Q9BVJ6	UTP14A													1					1		1											1	1
111	Q15532	SS18													1	1	1			1
112	Q9NZZ3	CHMP5											1
113	Q02978	SLC25A11													1																						1	1
114	Q9UKS6	PACSIN3																																			1
115	P08621	SNRNP70													1					1			1	1													1						1
116	O95232	LUC7L3													1					1			1	1			1
117	P07910	HNRNPC	1	1							1	1	1	1	1					1			1	1													1								1	1
118	P00387	CYB5R3
119	P30048	PRDX3													1	1				1																	1								1
120	Q92733	PRCC
121	Q16630	CPSF6													1					1			1					1	1
122	Q00765	REEP5
123	Q16698	DECR1
124	Q13247	SRSF6													1	1	1	1		1			1	1			1	1				1															1	1
125	Q15041	ARL6IP1																																															1
126	P17480	UBTF										1	1		1	1			1	1
127	O43818	RRP9													1					1		1											1	1
128	Q9Y3U8	RPL36													1					1											1						1	1	1	1	1	1							1
129	Q15050	RRS1											1		1					1		1											1	1	1												1	1
130	Q6RFH5	WDR74																		1
131	P42765	ACAA2
132	O75475	PSIP1													1	1	1			1			1	1	1		1
133	Q16836	HADH
134	Q9P2E9	RRBP1													1																						1	1
135	O43660	PLRG1													1					1			1	1
136	P05556	ITGB1																																			1								1				1
137	P18124	RPL7													1					1		1									1		1	1	1		1	1	1	1	1	1							1
138	Q15149	PLEC
139	Q7Z6I8	C5orf24
140	Q8NHH9	ATL2
141	P49006	MARCKSL1
142	Q9NRZ9	HELLS	1			1	1			1	1	1	1		1	1			1	1
143	P35249	RFC4	1	1	1			1					1	1
144	P08579	SNRPB2													1					1			1	1
145	Q8IWS0	PHF6													1	1				1
146	O43290	SART1													1					1		1	1	1	1								1	1
147	P62906	RPL10A													1					1											1						1	1	1	1	1								1
148	P14866	HNRNPL													1					1			1	1
149	P25490	YY1	1		1			1					1		1	1	1			1
150	P84090	ERH
151	Q9UQ35	SRRM2													1					1			1	1
152	Q01130	SRSF2													1	1	1	1		1			1	1				1				1															1	1
153	P62917	RPL8													1					1											1						1	1	1	1	1	1							1
154	O43809	NUDT21													1	1	1	1		1			1	1				1	1
155	P61224	RAP1B
156	P09661	SNRPA1													1					1			1	1
157	P07305	H1F0	1			1	1		1	1		1	1
158	P26599	PTBP1													1					1			1	1
159	Q9P013	CWC15													1					1			1	1
160	P22626	HNRNPA2B1													1	1	1		1	1		1	1	1								1					1	1									1	1
161	P61604	HSPE1													1																						1						1
162	Q8TEA8	DTD1	1	1											1					1		1															1	1		1
163	Q7RTV0	PHF5A													1	1				1			1	1
164	Q8WVK2	SNRNP27													1					1			1	1
165	P62750	RPL23A													1					1											1		1		1	1	1	1	1	1	1								1
166	O43709	WBSCR22									1	1	1		1	1				1		1											1	1
167	P05204	HMGN2
168	P09874	PARP1	1	1	1			1					1	1	1	1	1			1																	1								1	1	1
169	Q13636	RAB31																																															1
170	Q92879	CELF1													1				1	1			1	1			1										1	1
171	P09651	HNRNPA1	1	1									1	1	1					1			1	1								1															1	1
172	P18074	ERCC2	1			1		1					1		1	1	1			1			1														1								1
173	P62888	RPL30													1					1											1						1	1	1	1	1								1
174	Q9UKV3	ACIN1				1	1						1		1					1			1	1
175	Q15651	HMGN3									1	1	1		1	1	1			1
176	Q969G3	SMARCE1							1	1	1	1	1		1	1	1			1
177	P31942	HNRNPH3													1					1			1	1
178	Q13435	SF3B2													1					1			1	1
179	Q9H0U9	TSPYL1				1	1		1	1		1	1
180	Q15427	SF3B4													1					1			1	1
181	O60306	AQR	1					1							1					1			1	1
182	P51991	HNRNPA3													1					1			1	1								1
183	Q9UBW7	ZMYM2													1	1				1
184	P39023	RPL3													1					1											1		1		1	1	1	1	1	1	1								1
185	P04179	SOD2													1	1	1			1
186	P61769	B2M																																			1						1
187	Q8WVC0	LEO1									1	1	1		1	1	1			1			1					1	1								1								1
188	O75533	SF3B1													1					1			1	1			1
189	P26373	RPL13													1					1											1						1	1	1	1	1								1
190	Q15459	SF3A1													1					1			1	1			1
191	O43395	PRPF3													1					1			1	1
192	Q15393	SF3B3													1					1			1	1													1
193	P18077	RPL35A													1					1		1									1		1	1	1		1	1	1	1	1	1							1
194	Q96QC0	PPP1R10													1	1				1																											1
195	Q9P0L0	VAPA
196	P62314	SNRPD1													1					1		1	1	1			1
197	P11498	PC													1
198	P01111	NRAS													1																						1								1
199	Q8WVM8	SCFD1																																			1								1
200	P53999	SUB1													1	1	1			1
201	P62913	RPL11													1					1		1									1		1	1	1	1	1	1	1	1	1								1
202	Q15428	SF3A2													1					1			1	1			1
203	O14745	SLC9A3R1																																			1								1		1		1
204	P63165	SUMO1	1		1			1							1	1				1																	1								1	1			1
205	P61313	RPL15													1					1											1						1	1	1	1	1	1							1
206	Q9Y4W6	AFG3L2													1																						1
207	P36578	RPL4													1					1											1						1	1	1	1	1								1
208	P52948	NUP98	1	1											1				1	1		1										1					1								1	1	1
209	P18621	RPL17													1					1											1						1	1	1	1	1								1
210	P14678	SNRPB													1	1	1	1		1		1	1	1		1		1									1								1
211	P46776	RPL27A													1					1											1						1	1	1	1	1								1
212	Q13243	SRSF5													1	1	1	1		1			1	1			1	1				1															1	1
213	Q5T8P6	RBM26													1					1			1														1								1
214	Q9GZR7	DDX24																		1										1
215	Q9UHX1	PUF60													1	1				1			1
216	P52272	HNRNPM													1					1			1	1
217	P62318	SNRPD3													1	1	1	1		1		1	1	1		1	1	1									1								1
218	P09012	SNRPA													1					1			1	1
219	O95602	POLR1A													1	1				1
220	A8MWD9	#VALUE!
221	Q9UPT8	ZC3H4
222	Q9H0A0	NAT10	1	1									1	1	1					1		1											1	1
223	P62306	SNRPF													1	1	1	1		1		1	1	1		1		1
224	O14936	CASK													1	1	1			1																	1								1
225	Q9BSJ8	ESYT1
226	Q14527	HLTF	1					1			1	1	1		1	1	1			1																	1								1
227	P40926	MDH2																																			1								1
228	P40429	RPL13A													1					1											1						1	1	1	1	1								1
229	Q9BWJ5	SF3B5													1					1			1	1
230	P51149	RAB7A																																			1
231	Q12874	SF3A3													1					1			1	1			1
232	Q02543	RPL18A													1					1											1						1	1	1	1	1								1
233	P22087	FBL									1	1	1		1					1		1											1	1			1								1
234	O14776	TCERG1													1	1	1			1
235	P06748	NPM1	1			1	1	1	1	1	1	1	1		1	1				1													1			1	1	1	1						1		1
236	P13984	GTF2F2													1	1	1			1			1	1
237	P61513	RPL37A													1					1											1						1	1	1	1	1								1
238	Q07955	SRSF1													1	1	1	1		1			1	1	1		1	1				1															1	1
239	O00159	MYO1C													1																	1																	1
240	P50914	RPL14													1					1		1									1		1	1	1		1	1	1	1	1								1
241	P62304	SNRPE													1	1	1	1		1		1	1	1		1	1	1
242	Q5UIP0	RIF1	1					1
243	P31943	HNRNPH1													1					1			1	1
244	Q15717	ELAVL1													1																						1	1
245	Q99590	SCAF11													1					1			1	1			1
246	P41223	BUD31													1	1	1			1			1	1
247	P46778	RPL21													1					1											1						1	1	1	1	1								1
248	Q92979	EMG1													1					1		1											1	1
249	O60488	ACSL4
250	P23284	PPIB																																			1						1	1	1
251	Q9ULW0	TPX2																																			1								1
252	P62910	RPL32													1					1											1						1	1	1	1	1								1
253	Q04828	AKR1C1
254	P30050	RPL12													1					1											1		1		1	1	1	1	1	1	1								1
[truncated: 108 more columns]

[truncated: 3 more sheets: Imp-11, Imp-13, Exp-4]
