# Supplementary material for: Extensive cargo identification reveals distinct biological roles of the 12 importin pathways
Source: eLife. 2017 Jan 24;6:e21184. doi: 10.7554/eLife.21184 (PMC5305215; doi:10.7554/eLife.21184)
Supplement: Supplementary file 11. — (A) Ranks of mRNA processing factors. All of the 2nd-Z-15% and 3rd-Z-4% cargoes that are annotated with mRNA processing in Gene Ontology (GO) are listed with the ranks in the 2nd- and 3rd-Z-rankings. The color scale is set by percentile rank as indicated. Figure 7 was extracted from this table. (B) The 3rd-Z-rankings of ribosomal proteins. The ranks of the ribosomal proteins in the 3rd-Z-rankings of the 12 NTRs are presented. The color scale is set by percentile rank as indicated. For the 2nd-Z-rankings, see Figure 8. (C) Extracts of the GO term enrichments of the transcription factors found in the 2nd-Z-15% cargoes. Seventeen to 36 proteins in the 2nd-Z-15% cargoes of each NTR are annotated with ‘transcription factor activity, sequence-specific DNA binding' or ’transcription factor activity, protein binding’ in GO. The factors were analyzed for GO term enrichment (term type, biological process, BP) in (D). Typical terms that represent similar terms were extracted from (D). The p-value for the term enrichment and the number (#) of factors annotated with the term are presented. Total No. represents the number of proteins annotated with each term in the database. Cyan, p<0.05. Related terms are bundled in the same color. (D) Full table of the GO term enrichments of the transcription factors found in the 2nd-Z-15% cargoes. The 2nd-Z-15% cargoes that are annotated with ‘transcription factor activity, sequence-specific DNA binding" or ’transcription factor activity, protein binding’ in GO were analyzed for GO term enrichment (term type, BP). The analyzed transcription factors are listed at the bottom. For all of the combinations of GO terms and NTRs, the p-value for the term enrichment and the number (#) of transcription factors annotated with the term are presented. The numbers following ‘# in’ are the total numbers of transcription factors in the 2nd-Z-15% cargoes. Total No. represents the number of proteins annotated with each term in the database. Cyan, p<0.05. (C) w [file elife-21184-supp11.xlsx]

## Sheet: Legend
Supplementary file 11
mRNA processing factors, ribosomal proteins, and transcription factors
A. Ranks of mRNA processing factors
All of the 2nd-Z-15% and 3rd-Z-4% cargoes that are annotated with mRNA processing in Gene Ontology (GO) are listed with the ranks in the 2nd- and 3rd-Z-rankings. The color scale is set by percentile rank as indicated. Figure 7 was extracted from this table.
B. The 3rd-Z-rankings of ribosomal proteins
The ranks of the ribosomal proteins in the 3rd-Z-rankings of the 12 NTRs are presented. The color scale is set by percentile rank as indicated. For the 2nd-Z-rankings, see Figure 8.
C. Extracts of the GO term enrichments of the transcription factors found in the 2nd-Z-15% cargoes
Seventeen to 36 proteins in the 2nd-Z-15% cargoes of each NTR are annotated with "transcription factor activity, sequence-specific DNA binding" or "transcription factor activity, protein binding" in GO. The factors were analyzed for GO term enrichment (term type, biological process, BP) in (D). Typical terms that represent similar terms were extracted from (D). The p-value for the term enrichment…
D. Full table of the GO term enrichments of the transcription factors found in the 2nd-Z-15% cargoes
The 2nd-Z-15% cargoes that are annotated with "transcription factor activity, sequence-specific DNA binding" or "transcription factor activity, protein binding" in GO were analyzed for GO term enrichment (term type, BP). The analyzed transcription factors are listed at the bottom. For all of the combinations of GO terms and NTRs, the p-value for the term enrichment and the number (#) of transcrip…
Transcription factors analyzed
E. SRSRSR motif in the 3rd-Z-4% cargoes
The 3rd-Z-4% cargoes that contain an "SRSRSR" hexa-peptide sequence were counted.
(6 sheets including this one)

## Sheet: A. mRNA Processing Factors
	Color Scale: Top		0.04	4–8%	8–15%
Accession	Major Feature	Gene Name	Rank by 2nd or 3rd Z-score																								Description
			Imp-β		Trn-1		Trn-2		Trn-SR		Imp-4		Imp-5		Imp-7		Imp-8		Imp-9		Imp-11		Imp-13		Exp-4
			2nd	3rd	2nd	3rd	2nd	3rd	2nd	3rd	2nd	3rd	2nd	3rd	2nd	3rd	2nd	3rd	2nd	3rd	2nd	3rd	2nd	3rd	2nd	3rd
Q8N1G2	mRNA Capping	FTSJD2											1752														Cap-specific mRNA (nucleoside-2'-O-)-methyltransferase 1 OS=Homo sapiens GN=FTSJD2 PE=1 SV=1 - [MTR1_HUMAN]
Q9BTL3		FAM103A1	3	3																			263	1335			RNMT-activating mini protein OS=Homo sapiens GN=FAM103A1 PE=1 SV=1 - [RAM_HUMAN]
O43148		RNMT	2	2	1432		1420		1906	1400	358	993	327	776	1487	983	1066	628	687	491	1560	1245	598	126	447	609	mRNA cap guanine-N7 methyltransferase OS=Homo sapiens GN=RNMT PE=1 SV=1 - [MCES_HUMAN]
Q09161	Cap-Binding	NCBP1	25	8	327	196	1037	605	1373	861	751	509	1466	803	906	839	1220	619	655	494	1248	873	594	182	1075		Nuclear cap-binding protein subunit 1 OS=Homo sapiens GN=NCBP1 PE=1 SV=1 - [NCBP1_HUMAN]
P52298		NCBP2	19	7					1416	478			1529	1105	865						1510		602	87			Nuclear cap-binding protein subunit 2 OS=Homo sapiens GN=NCBP2 PE=1 SV=1 - [NCBP2_HUMAN]
Q96C86		DCPS	605	513	550	254	705	393	1760				1676		1793	1357	1715	1339	983	1104	457	1031	944	1496	1521	1046	m7GpppX diphosphatase OS=Homo sapiens GN=DCPS PE=1 SV=2 - [DCPS_HUMAN]
Q13151	hnRNP	HNRNPA0	247	102	11	11	13	8	145	1116	50	356	137	53	92	1449	422	1375	105	226	7	795	558	791	82	16	Heterogeneous nuclear ribonucleoprotein A0 OS=Homo sapiens GN=HNRNPA0 PE=1 SV=1 - [ROA0_HUMAN]
P09651		HNRNPA1	245	72	7	6	7	6	285	257	364	287	776	176	323	187	438	181	171	395	773	829	641	686	177	43	Heterogeneous nuclear ribonucleoprotein A1 OS=Homo sapiens GN=HNRNPA1 PE=1 SV=5 - [ROA1_HUMAN]
P22626		HNRNPA2B1	301	159	16	15	19	15	382	551	555	585	902	169	336	104	420	174	160	247	711	803	531	489	123	66	Heterogeneous nuclear ribonucleoproteins A2/B1 OS=Homo sapiens GN=HNRNPA2B1 PE=1 SV=2 - [ROA2_HUMAN]
P51991		HNRNPA3	634	462	13	9	14	7	531	862	260	141	823	153	165	49	163	86	182	364	405	814	987	395	210	118	Heterogeneous nuclear ribonucleoprotein A3 OS=Homo sapiens GN=HNRNPA3 PE=1 SV=2 - [ROA3_HUMAN]
P07910		HNRNPC	496	121	857	718	259	737	386	379	324	237	1140	339	337	142	570	343	117	298	563	852	676	180	229	194	Heterogeneous nuclear ribonucleoproteins C1/C2 OS=Homo sapiens GN=HNRNPC PE=1 SV=4 - [HNRPC_HUMAN]
Q14103		HNRNPD	851	419	8	10	8	12	566	337	623	801	1300	502	565	327	938	534	709	608	1237	1092	1512	915	633	314	Heterogeneous nuclear ribonucleoprotein D0 OS=Homo sapiens GN=HNRNPD PE=1 SV=1 - [HNRPD_HUMAN]
P52597		HNRNPF	1678	1183	95	29	52	28	1702	1355	382	71	211	1088	268	671	230	169	608	384	1289	804	1251	1295	304	396	Heterogeneous nuclear ribonucleoprotein F OS=Homo sapiens GN=HNRNPF PE=1 SV=3 - [HNRPF_HUMAN]
P31943		HNRNPH1	438	407	34	25	40	23	948	448	171	383	723	84	233	180	325	123	243	145	628	825	646	388	202	55	Heterogeneous nuclear ribonucleoprotein H OS=Homo sapiens GN=HNRNPH1 PE=1 SV=4 - [HNRH1_HUMAN]
P55795		HNRNPH2	741	618	41	19	42	17	1452	964	1126	640	534	130	363	179	280	232	302	212	802	995	573	329	208	70	Heterogeneous nuclear ribonucleoprotein H2 OS=Homo sapiens GN=HNRNPH2 PE=1 SV=1 - [HNRH2_HUMAN]
P31942		HNRNPH3	373	175	167	212	85	46	753	573	708	295	686	90	221	191	177	40	177	91	394	780	404	303	184	51	Heterogeneous nuclear ribonucleoprotein H3 OS=Homo sapiens GN=HNRNPH3 PE=1 SV=2 - [HNRH3_HUMAN]
P61978		HNRNPK	509	141	1130	639	331	602	351	182	611	206	919	152	459	215	569	281	318	351	982	639	580	451	315	185	Heterogeneous nuclear ribonucleoprotein K OS=Homo sapiens GN=HNRNPK PE=1 SV=1 - [HNRPK_HUMAN]
P14866		HNRNPL	453	110	491	805	125	896	634	613	154	199	477	59	532	130	621	374	148	387	999	676	921	272	236	56	Heterogeneous nuclear ribonucleoprotein L OS=Homo sapiens GN=HNRNPL PE=1 SV=2 - [HNRPL_HUMAN]
Q8WVV9		HNRPLL	145	50	1397		1430		1331	587	1281	729	774	1006	320	190	542	456	479	680	1018	1186	1056	925	212	1073	Heterogeneous nuclear ribonucleoprotein L-like OS=Homo sapiens GN=HNRPLL PE=1 SV=1 - [HNRLL_HUMAN]
P52272		HNRNPM	403	228	4	4	5	4	294	320	532	143	754	106	618	290	723	397	216	265	333	643	777	381	292	117	Heterogeneous nuclear ribonucleoprotein M OS=Homo sapiens GN=HNRNPM PE=1 SV=3 - [HNRPM_HUMAN]
O60506		SYNCRIP	770	290	866	178	483	335	1123	203	503	107	508	172	435	319	529	360	575	333	808	628	628	199	693	299	Heterogeneous nuclear ribonucleoprotein Q OS=Homo sapiens GN=SYNCRIP PE=1 SV=2 - [HNRPQ_HUMAN]
O43390		HNRNPR	471	1000	1421	850	133	817	374	487	1269	693	598	68	463	155	719	479	293	524	1236	1162	674	347	388	274	Heterogeneous nuclear ribonucleoprotein R OS=Homo sapiens GN=HNRNPR PE=1 SV=1 - [HNRPR_HUMAN]
Q00839		HNRNPU	123	62	837	139	205	627	395	793	415	420	1025	321	759	379	1247	706	475	484	1133	452	645	304	556	239	Heterogeneous nuclear ribonucleoprotein U OS=Homo sapiens GN=HNRNPU PE=1 SV=6 - [HNRPU_HUMAN]
Q9BUJ2		HNRNPUL1	572	174	1600		1586	1249	1503	1454	354	87	1382	1424	47	6	50	52	9	13	1253		1323	692	100	1162	Heterogeneous nuclear ribonucleoprotein U-like protein 1 OS=Homo sapiens GN=HNRNPUL1 PE=1 SV=2 - [HNRL1_HUMAN]
Q8IYB3	SR-Rich	SRRM1			1440		1040		1977		863	1178	1842						276	119	6	1221			723	1235	Serine/arginine repetitive matrix protein 1 OS=Homo sapiens GN=SRRM1 PE=1 SV=2 - [SRRM1_HUMAN]
Q9UQ35		SRRM2	202	170	203	398	147	590	3	1	1412		1463	785	249	1447	54	1433	151	21	803	909	1872	1462	355	200	Serine/arginine repetitive matrix protein 2 OS=Homo sapiens GN=SRRM2 PE=1 SV=2 - [SRRM2_HUMAN]
Q07955		SRSF1	1617	1383	328	798	113	580	55	18	984	1094	1159	562	105	21	84	125	238	160	490	657	786	1092	145	145	Serine/arginine-rich splicing factor 1 OS=Homo sapiens GN=SRSF1 PE=1 SV=2 - [SRSF1_HUMAN]
Q01130		SRSF2	133	279	234	702	143	359	8	11	156	707	628	75	68	22	85	65	152	168	373	1204	83	53	164	112	Serine/arginine-rich splicing factor 2 OS=Homo sapiens GN=SRSF2 PE=1 SV=4 - [SRSF2_HUMAN]
P84103		SRSF3	274	180	294	580	254	177	90	45	243	61	379	45	110	68	118	47	49	248	236	67	357	55	92	49	Serine/arginine-rich splicing factor 3 OS=Homo sapiens GN=SRSF3 PE=1 SV=1 - [SRSF3_HUMAN]
Q13243		SRSF5	1002	543	213	241	378	837	524		538	803	833		457	231	659	630	212	276	1504	1086	644	1268	379	318	Serine/arginine-rich splicing factor 5 OS=Homo sapiens GN=SRSF5 PE=1 SV=1 - [SRSF5_HUMAN]
Q13247		SRSF6	1964		212	370	279	171	16	4	740	979	537	920	288	73	446	233	124	502	1091	777	1728	1537	287	193	Serine/arginine-rich splicing factor 6 OS=Homo sapiens GN=SRSF6 PE=1 SV=2 - [SRSF6_HUMAN]
Q16629		SRSF7	377	195	553	325	592	115	26	9	200	765	380	42	86	25	120	39	85	352	224	475	232	94	79	158	Serine/arginine-rich splicing factor 7 OS=Homo sapiens GN=SRSF7 PE=1 SV=1 - [SRSF7_HUMAN]
Q9BRL6		SRSF8	115	503	738		1244		19	5			369	48									34	12			Serine/arginine-rich splicing factor 8 OS=Homo sapiens GN=SRSF8 PE=1 SV=1 - [SRSF8_HUMAN]
Q13242		SRSF9	1768						72														1934				Serine/arginine-rich splicing factor 9 OS=Homo sapiens GN=SRSF9 PE=1 SV=1 - [SRSF9_HUMAN]
O75494		SRSF10			1445		189																				Serine/arginine-rich splicing factor 10 OS=Homo sapiens GN=SRSF10 PE=1 SV=1 - [SRS10_HUMAN]
Q05519		SRSF11	1194	540	342	767	162	342	1764	1368	221	960	1199	395	81	34	81	59	93	241	338	116	1576	1160	185	115	Serine/arginine-rich splicing factor 11 OS=Homo sapiens GN=SRSF11 PE=1 SV=1 - [SRS11_HUMAN]
Q15637	Splicing Factor	SF1	645	183	1175	667	622	679	1301	809	314	86	903	166	667	278	722	383	445	323	880	633	1293	912	540	273	Splicing factor 1 OS=Homo sapiens GN=SF1 PE=1 SV=4 - [SF01_HUMAN]
Q15459		SF3A1	1621	1132	442	837	366	412	1667	1363	118	530	982	391	206	40	228	97	190	82	184	723	1313	1492	150	148	Splicing factor 3A subunit 1 OS=Homo sapiens GN=SF3A1 PE=1 SV=1 - [SF3A1_HUMAN]
Q15428		SF3A2	1623	920	402	870	320	437	1644	1346	126	594	782	690	177	50	209	95	202	55	106	637	1414	1440	133	165	Splicing factor 3A subunit 2 OS=Homo sapiens GN=SF3A2 PE=1 SV=2 - [SF3A2_HUMAN]
Q12874		SF3A3	1650	991	375	848	291	463	1674	1339	114	539	1021	716	222	57	243	111	231	81	227	947	1367	1448	160	132	Splicing factor 3A subunit 3 OS=Homo sapiens GN=SF3A3 PE=1 SV=1 - [SF3A3_HUMAN]
O75533		SF3B1	1660	1144	343	846	273	287	1542	1389	81	621	862	554	211	69	147	53	188	58	56	757	1326	1421	84	126	Splicing factor 3B subunit 1 OS=Homo sapiens GN=SF3B1 PE=1 SV=3 - [SF3B1_HUMAN]
Q13435		SF3B2	1638	1005	432	778	276	296	1522	1295	143	648	1000	582	282	51	206	73	178	123	214	728	1491	1338	151	81	Splicing factor 3B subunit 2 OS=Homo sapiens GN=SF3B2 PE=1 SV=2 - [SF3B2_HUMAN]
Q15393		SF3B3	1604	894	322	814	288	370	1516	1222	172	340	999	481	316	76	352	138	192	57	71	654	1191	1392	207	150	Splicing factor 3B subunit 3 OS=Homo sapiens GN=SF3B3 PE=1 SV=4 - [SF3B3_HUMAN]
Q15427		SF3B4	1552	876	458	782	214	407	1566	719	215	776	1029	523	311	55	217	48	180	89	126	626	843	1389	217	59	Splicing factor 3B subunit 4 OS=Homo sapiens GN=SF3B4 PE=1 SV=1 - [SF3B4_HUMAN]
Q9BWJ5		SF3B5	1634	1032	418	813	247	458	1478	1304	265	283	1077	557	217	30	207	55	229	33	77	828	1317	1465	188	79	Splicing factor 3B subunit 5 OS=Homo sapiens GN=SF3B5 PE=1 SV=1 - [SF3B5_HUMAN]
Q9Y3B4		SF3B14	1663	1133	336	868	246	519	1685	1344	43	98	912	511	181	66	188	68	330	256	148	886	1483	1493	131	207	Pre-mRNA branch site protein p14 OS=Homo sapiens GN=SF3B14 PE=1 SV=1 - [PM14_HUMAN]
Q96I25		RBM17	1565				1315								983		141						341	1601			Splicing factor 45 OS=Homo sapiens GN=RBM17 PE=1 SV=1 - [SPF45_HUMAN]
Q01081		U2AF1	190	1134	154	153	201	201	202	63	329	121	175	18	99	549	148	35	48	330	177	21	1476	1193	66	34	Splicing factor U2AF 35 kDa subunit OS=Homo sapiens GN=U2AF1 PE=1 SV=3 - [U2AF1_HUMAN]
P26368		U2AF2	261	569	360	545	342	374	1293	705	220	80	218	39	111	270	128	45	76	167	286	40	1107	755	106	67	Splicing factor U2AF 65 kDa subunit OS=Homo sapiens GN=U2AF2 PE=1 SV=4 - [U2AF2_HUMAN]
P23246		SFPQ	111	79	219	1198	1209	655	1890	1581	31	10	1831	1540	74	798	24	261	547	940	1542	1282	143	16	42	26	Splicing factor, proline- and glutamine-rich OS=Homo sapiens GN=SFPQ PE=1 SV=2 - [SFPQ_HUMAN]
Q9UHX1		PUF60	1348	1234	456	558	187	75	1842	1238	511	794	1186	522	445	212	323	139	215	299	134	146	1618	1326	311	312	Poly(U)-binding-splicing factor PUF60 OS=Homo sapiens GN=PUF60 PE=1 SV=1 - [PUF60_HUMAN]
Q8NAV1		PRPF38A																					1750				Pre-mRNA-splicing factor 38A OS=Homo sapiens GN=PRPF38A PE=1 SV=1 - [PR38A_HUMAN]
Q5VTL8		PRPF38B			249	51	74	137	11		128						156				93				318		Pre-mRNA-splicing factor 38B OS=Homo sapiens GN=PRPF38B PE=1 SV=1 - [PR38B_HUMAN]
Q92620		DHX38	1010	1337	781	184	244	382	70	37			1350	824	1463	1278	1696	1453					630	1471	1204		Pre-mRNA-splicing factor ATP-dependent RNA helicase PRP16 OS=Homo sapiens GN=DHX38 PE=1 SV=2 - [PRP16_HUMAN]
Q9ULR0		ISY1	432	111	1635				1837				552	518	1534	1275	962		916		1608		696	254	1347		Pre-mRNA-splicing factor ISY1 homolog OS=Homo sapiens GN=ISY1 PE=1 SV=3 - [ISY1_HUMAN]
Q9NW64		RBM22	162						581				617										1030	356			Pre-mRNA-splicing factor RBM22 OS=Homo sapiens GN=RBM22 PE=1 SV=1 - [RBM22_HUMAN]
O95391		SLU7	411																				1527				Pre-mRNA-splicing factor SLU7 OS=Homo sapiens GN=SLU7 PE=1 SV=2 - [SLU7_HUMAN]
O75934		BCAS2	944	451	262	744	262	988	794	246	1099	670	571	164	292	203	562	412	866		708		727	169	509	324	Pre-mRNA-splicing factor SPF27 OS=Homo sapiens GN=BCAS2 PE=1 SV=1 - [SPF27_HUMAN]
Q9HCS7		XAB2	1575	871					1793				1883	1479	1007	589	80	468	658				1211	656	1093		Pre-mRNA-splicing factor SYF1 OS=Homo sapiens GN=XAB2 PE=1 SV=2 - [SYF1_HUMAN]
O43143		DHX15	424	699	1116	641	775	708	406	50	391	158	1576	874	1137	1186	1356	773	652	404	1075	943	1385	918	833	408	Putative pre-mRNA-splicing factor ATP-dependent RNA helicase DHX15 OS=Homo sapiens GN=DHX15 PE=1 SV=2 - [DHX15_HUMAN]
O60231		DHX16	1981		1392		1079		1999		1227		1239	1386	98	1426	1852				1606		1049	1583			Putative pre-mRNA-splicing factor ATP-dependent RNA helicase DHX16 OS=Homo sapiens GN=DHX16 PE=1 SV=2 - [DHX16_HUMAN]
O60508		CDC40													1277		1059	559									Pre-mRNA-processing factor 17 OS=Homo sapiens GN=CDC40 PE=1 SV=1 - [PRP17_HUMAN]
Q9UMS4		PRPF19	557	673	805	508	298	643	186	151	308	414	1032	251	578	261	726	573	466	284	1129	891	714	668	507	206	Pre-mRNA-processing factor 19 OS=Homo sapiens GN=PRPF19 PE=1 SV=1 - [PRP19_HUMAN]
O75400		PRPF40A	1819	1219	166	898	528	414	364	224	122	1001	450	521	476	114	115	99	95	442	32	193	1827	1613	52	105	Pre-mRNA-processing factor 40 homolog A OS=Homo sapiens GN=PRPF40A PE=1 SV=2 - [PR40A_HUMAN]
O94906		PRPF6	340	594	93	119	28	26	1567	1519	1576		1945	1572	173	26	700	435	7	11	548	1190	218	1581	1330	1043	Pre-mRNA-processing factor 6 OS=Homo sapiens GN=PRPF6 PE=1 SV=1 - [PRP6_HUMAN]
Q6P2Q9		PRPF8	1168	864	1017	287	353	680	584	305	777	384	1500	804	937	648	1169	616	854	436	735	465	1395	916	661	380	Pre-mRNA-processing-splicing factor 8 OS=Homo sapiens GN=PRPF8 PE=1 SV=2 - [PRP8_HUMAN]
P08621	snRNP	SNRNP70	303	90	666	634	75	546	440	737	1220	1003	680	307	302	75	686	325	115	128	61	708	653	1317	380	125	U1 small nuclear ribonucleoprotein 70 kDa OS=Homo sapiens GN=SNRNP70 PE=1 SV=2 - [RU17_HUMAN]
P09012		SNRPA	1030	1365	444	772	400	915	218	620	459	817	1063	365	117	48	142	96	218	137	415	507	1887	1445	361	159	U1 small nuclear ribonucleoprotein A OS=Homo sapiens GN=SNRPA PE=1 SV=3 - [SNRPA_HUMAN]
P09661		SNRPA1	1463	918	338	836	316	284	1664	1310	112	568	976	595	207	35	231	94	156	48	107	502	1475	1460	141	110	U2 small nuclear ribonucleoprotein A' OS=Homo sapiens GN=SNRPA1 PE=1 SV=2 - [RU2A_HUMAN]
P14678		SNRPB	764	850	333	834	222	568	1540	1068	238	629	795	709	228	58	143	84	210	124	226	543	736	1167	219	196	Small nuclear ribonucleoprotein-associated proteins B and B' OS=Homo sapiens GN=SNRPB PE=1 SV=2 - [RSMB_HUMAN]
P08579		SNRPB2	1422	842	311	887	257	322	1603	1276	84	814	1050	525	183	37	216	81	144	71	268	594	1510	1454	85	195	U2 small nuclear ribonucleoprotein B'' OS=Homo sapiens GN=SNRPB2 PE=1 SV=1 - [RU2B_HUMAN]
P09234		SNRPC	354	436	555	817	393	349	915	561	411	755	825	636	130	164	170	205	272	155	310	694	710	298	91	106	U1 small nuclear ribonucleoprotein C OS=Homo sapiens GN=SNRPC PE=1 SV=1 - [RU1C_HUMAN]
P62314		SNRPD1	743	799	300	821	241	417	1271	760	166	349	896	627	359	74	441	214	196	127	481	135	1602	1356	364	276	Small nuclear ribonucleoprotein Sm D1 OS=Homo sapiens GN=SNRPD1 PE=1 SV=1 - [SMD1_HUMAN]
P62316		SNRPD2	1199	1259	604	736	238	531	1646	850	284	221	1308	1109	352	118	493	294	311	64	342	1029	1084	1425	227	236	Small nuclear ribonucleoprotein Sm D2 OS=Homo sapiens GN=SNRPD2 PE=1 SV=1 - [SMD2_HUMAN]
P62318		SNRPD3	843	982	384	828	226	631	1523	1148	549	482	861	911	260	53	162	88	217	77	282	417	631	1235	256	183	Small nuclear ribonucleoprotein Sm D3 OS=Homo sapiens GN=SNRPD3 PE=1 SV=1 - [SMD3_HUMAN]
P62304		SNRPE	1512	930	357	747	203	504	1399	941	230	491	948	598	285	62	293	102	241	141	396	464	1458	1234	431	267	Small nuclear ribonucleoprotein E OS=Homo sapiens GN=SNRPE PE=1 SV=1 - [RUXE_HUMAN]
P62306		SNRPF	584	744	426	348	466	60	893	1208	73	142	1191	678	171	165	266	192	223	186	240	927	562	1238	329	244	Small nuclear ribonucleoprotein F OS=Homo sapiens GN=SNRPF PE=1 SV=1 - [RUXF_HUMAN]
P57678		GEMIN4	900	309			769		1205	349	671	311	698	145	281	245	290	118					672	427	261	86	Gem-associated protein 4 OS=Homo sapiens GN=GEMIN4 PE=1 SV=2 - [GEMI4_HUMAN]
Q8TEQ6		GEMIN5	671	241	1461				1263	950	1452		1085	533	711	296	862	433					406	51			Gem-associated protein 5 OS=Homo sapiens GN=GEMIN5 PE=1 SV=3 - [GEMI5_HUMAN]
O43395		PRPF3	1694		1339	693	915	309	1357	912	1428		1663		571	193	454	1111	191	25	1340	1109	1955	1562	394	129	U4/U6 small nuclear ribonucleoprotein Prp3 OS=Homo sapiens GN=PRPF3 PE=1 SV=2 - [PRPF3_HUMAN]
Q8WWY3		PRPF31							214				244		778	1388	139	828									U4/U6 small nuclear ribonucleoprotein Prp31 OS=Homo sapiens GN=PRPF31 PE=1 SV=2 - [PRP31_HUMAN]
O43172		PRPF4	1021	367	619	506	181	624	182	208	780	401	1097	288	569	336	614	340	677	343	892	627	1435	673	406	373	U4/U6 small nuclear ribonucleoprotein Prp4 OS=Homo sapiens GN=PRPF4 PE=1 SV=2 - [PRP4_HUMAN]
Q8WVK2		SNRNP27	305	743									182	38	274		242		164	172			223	1329	647		U4/U6.U5 small nuclear ribonucleoprotein 27 kDa protein OS=Homo sapiens GN=SNRNP27 PE=1 SV=1 - [SNR27_HUMAN]
O43290		SART1																	146	22	510						U4/U6.U5 tri-snRNP-associated protein 1 OS=Homo sapiens GN=SART1 PE=1 SV=1 - [SNUT1_HUMAN]
Q53GS9		USP39	387		976	811	185	31	1551		318	1066	834		662	250	260	120	1190		1097		1284	472	637		U4/U6.U5 tri-snRNP-associated protein 2 OS=Homo sapiens GN=USP39 PE=1 SV=2 - [SNUT2_HUMAN]
O75643		SNRNP200	779	841	942	201	512	564	573	536	403	682	1527	773	912	652	1480	1020	707	666	1147	608	1285	839	830	485	U5 small nuclear ribonucleoprotein 200 kDa helicase OS=Homo sapiens GN=SNRNP200 PE=1 SV=2 - [U520_HUMAN]
Q96DI7		SNRNP40	318	67	417	763	532	576	381	437	1480	982	988	238	314	113	119	67	573		1375		526	106	259	242	U5 small nuclear ribonucleoprotein 40 kDa protein OS=Homo sapiens GN=SNRNP40 PE=1 SV=1 - [SNR40_HUMAN]
Q15029		EFTUD2	855	737	787	164	643	354	1145	339	1027	549	1588	1050	1140	969	1362	727	676	520	766	400	1183	611	751	460	116 kDa U5 small nuclear ribonucleoprotein component OS=Homo sapiens GN=EFTUD2 PE=1 SV=1 - [U5S1_HUMAN]
O95400		CD2BP2	224	107	1274	530	1164	785	1661	1402	319	1042	1792	1532	1608	1255	652	353	539	575	836	1224	273	555	591	304	CD2 antigen cytoplasmic tail-binding protein 2 OS=Homo sapiens GN=CD2BP2 PE=1 SV=1 - [CD2B2_HUMAN]
O15116		LSM1													1429		625		1689		1648				1650		U6 snRNA-associated Sm-like protein LSm1 OS=Homo sapiens GN=LSM1 PE=1 SV=1 - [LSM1_HUMAN]
Q9Y333		LSM2	611	588	1048		880	780	1059		559	624	1839		1685		1181	754	1567		1548		1021	882	575	686	U6 snRNA-associated Sm-like protein LSm2 OS=Homo sapiens GN=LSM2 PE=1 SV=1 - [LSM2_HUMAN]
P62310		LSM3	408	164	776	730	215	774	620	219	574	314	1410	958	913	975	1301	724	660	443	794	748	879	426	706	720	U6 snRNA-associated Sm-like protein LSm3 OS=Homo sapiens GN=LSM3 PE=1 SV=2 - [LSM3_HUMAN]
Q9Y4Z0		LSM4	852	913	693	456	605	646	1244	762	1004	324	1793	1164	1059	853	1352	815	643	315	537	133	1677	1011	652	598	U6 snRNA-associated Sm-like protein LSm4 OS=Homo sapiens GN=LSM4 PE=1 SV=1 - [LSM4_HUMAN]
Q9Y4Y9		LSM5									420																U6 snRNA-associated Sm-like protein LSm5 OS=Homo sapiens GN=LSM5 PE=1 SV=3 - [LSM5_HUMAN]
P62312		LSM6	364	714	1436	943	565	839	1411	849	1107	654	1805		1009	1033	1377	892	777	664	1318	1222	1725	1366	690	350	U6 snRNA-associated Sm-like protein LSm6 OS=Homo sapiens GN=LSM6 PE=1 SV=1 - [LSM6_HUMAN]
Q9UK45		LSM7	971						1072	1272			1864	1308	792	601	1424	1267	1227	909	1242	1093	1746		771	898	U6 snRNA-associated Sm-like protein LSm7 OS=Homo sapiens GN=LSM7 PE=1 SV=1 - [LSM7_HUMAN]
O95232		LUC7L3	251	526	1341	719	666	426	1618	868	136	79	111	85	115	23	134	34	116	283	418	57	623	125	68	61	Luc7-like protein 3 OS=Homo sapiens GN=LUC7L3 PE=1 SV=2 - [LC7L3_HUMAN]
O95777		NAA38	578	1148	1078	661	838	340	851		1271	826	1844		1653	1125	1304	801	400	221			1302	1080	773	417	N-alpha-acetyltransferase 38, NatC auxiliary subunit OS=Homo sapiens GN=NAA38 PE=1 SV=3 - [NAA38_HUMAN]
Q7RTV0		PHF5A	1603	936	546	916	245	633	1724	1373	133	188	968	611	176	95	116	93	163	102	287	704	1116	1443	275	73	PHD finger-like domain-containing protein 5A OS=Homo sapiens GN=PHF5A PE=1 SV=1 - [PHF5A_HUMAN]
Q9Y5S9	Exon Junction Complex	RBM8A	497	896	517	73	505	113	976	431	783	721	1857		1614	1350	1052	521	281	131	109	92	9	5	570	378	RNA-binding protein 8A OS=Homo sapiens GN=RBM8A PE=1 SV=1 - [RBM8A_HUMAN]
P38919		EIF4A3	629	572	289	133	392	697	256	202	394	653	998	236	535	365	852	444	490	157	24	4	737	503	681	333	Eukaryotic initiation factor 4A-III OS=Homo sapiens GN=EIF4A3 PE=1 SV=4 - [IF4A3_HUMAN]
P61326		MAGOH	1643	1247	388	46	329	221	1183	766	484	767	1414	831	929	1158	975	782	402	245	841	367	8	4	450	581	Protein mago nashi homolog OS=Homo sapiens GN=MAGOH PE=1 SV=1 - [MGN_HUMAN]
Q9BZI7		UPF3B	720	331					348	890	731		778	196	609	301	642						1221	1474			Regulator of nonsense transcripts 3B OS=Homo sapiens GN=UPF3B PE=1 SV=1 - [REN3B_HUMAN]
Q96FV9	THO Complex	THOC1	105	70	72				9	54	1425		6	7	448		942		590		1452		1762	1571			THO complex subunit 1 OS=Homo sapiens GN=THOC1 PE=1 SV=1 - [THOC1_HUMAN]
Q8NI27		THOC2	1933		938		1103		1963	1540			1966	1569	71	378	245	134					460	1267			THO complex subunit 2 OS=Homo sapiens GN=THOC2 PE=1 SV=2 - [THOC2_HUMAN]
Q96J01		THOC3	353	679	655	175	552	244	163	85	1102	1004	895	1172	1122	987	1414	857			911		1217	461	658	747	THO complex subunit 3 OS=Homo sapiens GN=THOC3 PE=1 SV=1 - [THOC3_HUMAN]
Q13769		THOC5													934		636										THO complex subunit 5 homolog OS=Homo sapiens GN=THOC5 PE=1 SV=2 - [THOC5_HUMAN]
Q86W42		THOC6	1428	1387			1427	1106	171	1113	578	116	1483	965	488	312	712	451	294	389	1254	904	1471	1495	222	246	THO complex subunit 6 homolog OS=Homo sapiens GN=THOC6 PE=1 SV=1 - [THOC6_HUMAN]
Q6I9Y2		THOC7															1864										THO complex subunit 7 homolog OS=Homo sapiens GN=THOC7 PE=1 SV=3 - [THOC7_HUMAN]
Q9C0J8	mRNA 3'-End Processing	WDR33	153	179	812	806	920	1193	233	1146	892		1037	864	232	542	94	426	1687		1421		632	175	61	37	pre-mRNA 3' end processing protein WDR33 OS=Homo sapiens GN=WDR33 PE=1 SV=2 - [WDR33_HUMAN]
Q6UN15		FIP1L1			1555	1056	253								32		874										Pre-mRNA 3'-end-processing factor FIP1 OS=Homo sapiens GN=FIP1L1 PE=1 SV=1 - [FIP1_HUMAN]
O94913		PCF11	1941						1360				1151		170		650						1613	1567			Pre-mRNA cleavage complex 2 protein Pcf11 OS=Homo sapiens GN=PCF11 PE=1 SV=3 - [PCF11_HUMAN]
Q10570		CPSF1	1029	505	690	890	1105	1201	1481	1531	231	216	1950	1511	48	583	1236	1239	56	1114	1586	1213	1837	1320	114	426	Cleavage and polyadenylation specificity factor subunit 1 OS=Homo sapiens GN=CPSF1 PE=1 SV=2 - [CPSF1_HUMAN]
Q9P2I0		CPSF2	825		578	400	351	597	309	166	1434	1232	1326	904	917	344	1541	1329	530		99		1856		1730		Cleavage and polyadenylation specificity factor subunit 2 OS=Homo sapiens GN=CPSF2 PE=1 SV=2 - [CPSF2_HUMAN]
Q9UKF6		CPSF3	1104	1181	1348		274	664	1367	1079	1270		1666	1055	1358	1201	1664	1175	663	451			1639	1319	1359	1194	Cleavage and polyadenylation specificity factor subunit 3 OS=Homo sapiens GN=CPSF3 PE=1 SV=1 - [CPSF3_HUMAN]
O43809		NUDT21	415	1285	335	699	99	699	157	319	593	217	253	180	254	244	165	37	154	325	590	491	1478	643	254	74	Cleavage and polyadenylation specificity factor subunit 5 OS=Homo sapiens GN=NUDT21 PE=1 SV=1 - [CPSF5_HUMAN]
Q16630		CPSF6	281	765	647	675	368	549	125	249	201	234	289	110	125	263	96	148	121	292	738	134	687	763	103	20	Cleavage and polyadenylation specificity factor subunit 6 OS=Homo sapiens GN=CPSF6 PE=1 SV=2 - [CPSF6_HUMAN]
Q8N684		CPSF7	187	1090	521	563	191	325	62	61	421	173	145	26	158	277	208	91	89	187	138	143	1136	629	62	31	Cleavage and polyadenylation specificity factor subunit 7 OS=Homo sapiens GN=CPSF7 PE=1 SV=1 - [CPSF7_HUMAN]
Q05048		CSTF1	1728	1565	687	1096	1186	685	384	49			378	194	856	529	351	225			1529		1450	1553	825		Cleavage stimulation factor subunit 1 OS=Homo sapiens GN=CSTF1 PE=1 SV=1 - [CSTF1_HUMAN]
P33240		CSTF2	1795	1400	758	518	289	902	264	99	1089	435	996	1027	178	1162	1040	1467	404	289	992	432	1636	1330	536	471	Cleavage stimulation factor subunit 2 OS=Homo sapiens GN=CSTF2 PE=1 SV=1 - [CSTF2_HUMAN]
P51003		PAPOLA	771	1091	793		1239				185		1769		413		1399	1116	1311		662	1120	1596	1315	698	329	Poly(A) polymerase alpha OS=Homo sapiens GN=PAPOLA PE=1 SV=4 - [PAPOA_HUMAN]
Q9NVV4		MTPAP											1961				1882						1975				Poly(A) RNA polymerase, mitochondrial OS=Homo sapiens GN=MTPAP PE=1 SV=1 - [PAPD1_HUMAN]
Q9H6E5		TUT1	1315	1271	784	1003	1415	997	850	833	1361		1532	1307	1284	1321	1618	1415	981	830	691	773	1533	807	1661		Speckle targeted PIP5K1A-regulated poly(A) polymerase OS=Homo sapiens GN=TUT1 PE=1 SV=2 - [STPAP_HUMAN]
Q9H0D6		XRN2	327	138	1393	893	235	1025	32	1048			195	17	584	149	299	753	38	1103	1634		525	81	25	5	5'-3' exoribonuclease 2 OS=Homo sapiens GN=XRN2 PE=1 SV=1 - [XRN2_HUMAN]
O43865		AHCYL1	1231	457	752	168	689	350			1525				1408	1119	1525	1015	1138	652	1140	819	1693	1265	978	992	Putative adenosylhomocysteinase 2 OS=Homo sapiens GN=AHCYL1 PE=1 SV=2 - [SAHH2_HUMAN]
Q92797		SYMPK	594	1392	358	692	932	490			1278						1889				1672		1875		1626		Symplekin OS=Homo sapiens GN=SYMPK PE=1 SV=2 - [SYMPK_HUMAN]
A5YKK6		CNOT1	544	1170					704	253			768	559	1782		461						109	1299	933		CCR4-NOT transcription complex subunit 1 OS=Homo sapiens GN=CNOT1 PE=1 SV=2 - [CNOT1_HUMAN]
Q8TCS8		PNPT1																							1712		Polyribonucleotide nucleotidyltransferase 1, mitochondrial OS=Homo sapiens GN=PNPT1 PE=1 SV=2 - [PNPT1_HUMAN]
Q12849		GRSF1	64	1462	1618								837		123	59	201	253			1616		1909	1508	805		G-rich sequence factor 1 OS=Homo sapiens GN=GRSF1 PE=1 SV=3 - [GRSF1_HUMAN]
Q9UKV8		AGO2	1444	1186					1853				1913										280	634			Protein argonaute-2 OS=Homo sapiens GN=AGO2 PE=1 SV=3 - [AGO2_HUMAN]
Q08211	RNA Helicase	DHX9	640	176	959	851	135	659	765	714	129	23	542	105	225	86	157	305	292	134	1132	483	837	333	116	50	ATP-dependent RNA helicase A OS=Homo sapiens GN=DHX9 PE=1 SV=4 - [DHX9_HUMAN]
Q92499		DDX1	1105	1049	1070	270	389	852	867	709	423	517	1418	841	926	506	1078	796	812	452	1291	846	1348	991	1001	429	ATP-dependent RNA helicase DDX1 OS=Homo sapiens GN=DDX1 PE=1 SV=2 - [DDX1_HUMAN]
O00148		DDX39A	821	670	740	377	325	811	1232	706	645	165	1141	590	720	274	761	422	609	398	984	736	1068	873	4	2	ATP-dependent RNA helicase DDX39A OS=Homo sapiens GN=DDX39A PE=1 SV=2 - [DX39A_HUMAN]
Q9UHI6		DDX20									585	661	1012														Probable ATP-dependent RNA helicase DDX20 OS=Homo sapiens GN=DDX20 PE=1 SV=2 - [DDX20_HUMAN]
Q9BUQ8		DDX23	93	273	315	726	292	887	262	1057	36	92	154	296	403	128	380	147	72	151	261	387	22	680	73	123	Probable ATP-dependent RNA helicase DDX23 OS=Homo sapiens GN=DDX23 PE=1 SV=3 - [DDX23_HUMAN]
Q7L014		DDX46	221	1436	593	485	488	71	1393	896	327	128	188	33	287	846	167	150	86	193	73	44	1171	1359	90	77	Probable ATP-dependent RNA helicase DDX46 OS=Homo sapiens GN=DDX46 PE=1 SV=2 - [DDX46_HUMAN]
Q9H0S4		DDX47	806	1569	1389		54		85	1230	841		1746	1277	1732		1683				154		793	1056			Probable ATP-dependent RNA helicase DDX47 OS=Homo sapiens GN=DDX47 PE=1 SV=1 - [DDX47_HUMAN]
P17844		DDX5	68	86	1552	1146	202	1071	116	58	1617		910	421	55	63	262	319	67	698	272	86	603	1590	622	564	Probable ATP-dependent RNA helicase DDX5 OS=Homo sapiens GN=DDX5 PE=1 SV=1 - [DDX5_HUMAN]
Q13838		DDX39B	624	772	304	777	256	695	392	791	816	259	1426	779	562	148	776	553	478	388	1053	439	1765	1350	3	1	Spliceosome RNA helicase DDX39B OS=Homo sapiens GN=DDX39B PE=1 SV=1 - [DX39B_HUMAN]
P42285		SKIV2L2	742	485	549	171	242	803	388	640	665	262	724	402	672	233	802	490	268	413	861	664	1153	422	338	231	Superkiller viralicidic activity 2-like 2 OS=Homo sapiens GN=SKIV2L2 PE=1 SV=3 - [SK2L2_HUMAN]
P38159	RNA-Binding	RBMX	211	354	423	77	115	401	1548	917	17	9	1129	548	599	1463	76		5	6	5	122	1269	1580	78	21	RNA-binding motif protein, X chromosome OS=Homo sapiens GN=RBMX PE=1 SV=3 - [RBMX_HUMAN]
P98175		RBM10											1907										2012				RNA-binding protein 10 OS=Homo sapiens GN=RBM10 PE=1 SV=3 - [RBM10_HUMAN]
P49756		RBM25	358	113	570	694	182	442	50	156	249	565	574	120	252	734	171	79	103	225	53	5	1515	940	205	127	RNA-binding protein 25 OS=Homo sapiens GN=RBM25 PE=1 SV=3 - [RBM25_HUMAN]
Q5T8P6		RBM26	1331	1373	676	649	313	395	1863	1235	1021	744	375	62	172	96	205	106	213	194	493	535	1463	990	136	28	RNA-binding protein 26 OS=Homo sapiens GN=RBM26 PE=1 SV=3 - [RBM26_HUMAN]
Q9P2N5		RBM27	57	53					304				1568						1698		1658		100	21			RNA-binding protein 27 OS=Homo sapiens GN=RBM27 PE=1 SV=2 - [RBM27_HUMAN]
Q9NW13		RBM28	2016										1877		62		509						2050				RNA-binding protein 28 OS=Homo sapiens GN=RBM28 PE=1 SV=3 - [RBM28_HUMAN]
Q14498		RBM39	85	779	244	149	334	147	200	121	160	191	189	12	120	735	224	92	66	320	47	10	902	549	93	35	RNA-binding protein 39 OS=Homo sapiens GN=RBM39 PE=1 SV=2 - [RBM39_HUMAN]
Q9BWF3		RBM4													182		289								1231		RNA-binding protein 4 OS=Homo sapiens GN=RBM4 PE=1 SV=1 - [RBM4_HUMAN]
Q9BTD8		RBM42	213												60		97		41				1895				RNA-binding protein 42 OS=Homo sapiens GN=RBM42 PE=1 SV=1 - [RBM42_HUMAN]
P35637		FUS	220	97	46	21	43	18	1132	212	577	599	765	237	186	446	336	136	388	208	171	53	811	1154	533	221	RNA-binding protein FUS OS=Homo sapiens GN=FUS PE=1 SV=1 - [FUS_HUMAN]
Q9UKM9		RALY											25		202		3	5	16	4	9	1	276	79			RNA-binding protein Raly OS=Homo sapiens GN=RALY PE=1 SV=1 - [RALY_HUMAN]
Q15287		RNPS1			1557		1151				1461				550		426								29		RNA-binding protein with serine-rich domain 1 OS=Homo sapiens GN=RNPS1 PE=1 SV=1 - [RNPS1_HUMAN]
Q9NQ29		LUC7L	178	297	345	707	399	384	1847	1232	98	197	418	37	107	372	135	248	77	197	202	160	544	289	97	82	Putative RNA-binding protein Luc7-like 1 OS=Homo sapiens GN=LUC7L PE=1 SV=1 - [LUC7L_HUMAN]
Q9Y383		LUC7L2	291	300	361	721	294	429	1236	515	299	56	479	52	84	188	124	74	102	158	908	244	738	576	155	30	Putative RNA-binding protein Luc7-like 2 OS=Homo sapiens GN=LUC7L2 PE=1 SV=2 - [LC7L2_HUMAN]
P11940		PABPC1	1133	946	313	696	1147	688	1008	567	1276	811	1067	396	1492	725	1479	928	1080	995	839	565	582	96	1384	1153	Polyadenylate-binding protein 1 OS=Homo sapiens GN=PABPC1 PE=1 SV=2 - [PABP1_HUMAN]
Q86U42		PABPN1			21	12	22	11	595	1128	386		753	649	766		251	89	886	770	1488	1304			627		Polyadenylate-binding protein 2 OS=Homo sapiens GN=PABPN1 PE=1 SV=3 - [PABP2_HUMAN]
P26599		PTBP1	344	103	1281	752	344	965	483	256	398	393	460	108	379	175	585	293	158	367	981	838	657	281	171	44	Polypyrimidine tract-binding protein 1 OS=Homo sapiens GN=PTBP1 PE=1 SV=1 - [PTBP1_HUMAN]
O95758		PTBP3	1435						1131				474		104	512	316	601					393	181			Polypyrimidine tract-binding protein 3 OS=Homo sapiens GN=PTBP3 PE=1 SV=2 - [PTBP3_HUMAN]
Q15365		PCBP1	1651	951	305	116	824	180	663	113	876	260	536	418	1001	509	1127	691	923	462	771	409	1311	720	1037	1064	Poly(rC)-binding protein 1 OS=Homo sapiens GN=PCBP1 PE=1 SV=2 - [PCBP1_HUMAN]
Q15366		PCBP2	879	1332	90	1026	1310	1073	732	1264	854	823	172	1322	854	812	587	447	922	887	525	929	246	1262	921	1196	Poly(rC)-binding protein 2 OS=Homo sapiens GN=PCBP2 PE=1 SV=1 - [PCBP2_HUMAN]
Q66PJ3		ARL6IP4	113	342	321	48	206	30	609	295	209	94	357	56	208	36	212	98	501		431		222	321	70	33	ADP-ribosylation factor-like protein 6-interacting protein 4 OS=Homo sapiens GN=ARL6IP4 PE=1 SV=2 - [AR6P4_HUMAN]
Q9UKV3		ACIN1	140	92	350	799	188	233	228	189	178	66	1017	370	146	33	149	38	174	101	1173	546	832	568	130	88	Apoptotic chromatin condensation inducer in the nucleus OS=Homo sapiens GN=ACIN1 PE=1 SV=2 - [ACINU_HUMAN]
Q6NYC1		JMJD6	665	652	326	677	883	406	1169	915	930	529	1773	1216	1786	1294	1481	1058	732	716	748	202	900	1114	1041	501	Bifunctional arginine demethylase and lysyl-hydroxylase JMJD6 OS=Homo sapiens GN=JMJD6 PE=1 SV=1 - [JMJD6_HUMAN]
Q99459		CDC5L	292	161	277	56	79	683	154	660	339	57	377	605	166	32	638	330	569	519	768	411	1210	868	148	172	Cell division cycle 5-like protein OS=Homo sapiens GN=CDC5L PE=1 SV=2 - [CDC5L_HUMAN]
Q8IX12		CCAR1	216	1136	742	822	960	237	435	1135	550	138	1187	436	699	1245	29	33	1422		1528	1167	1393	1464	1291	1227	Cell division cycle and apoptosis regulator protein 1 OS=Homo sapiens GN=CCAR1 PE=1 SV=2 - [CCAR1_HUMAN]
Q9BZJ0		CRNKL1															68										Crooked neck-like protein 1 OS=Homo sapiens GN=CRNKL1 PE=1 SV=4 - [CRNL1_HUMAN]
Q92879		CELF1	472	583	227	222	224		496	244	1201	897	568	86	163	64	486	221	170	44	1409	1107	926	464	277	83	CUGBP Elav-like family member 1 OS=Homo sapiens GN=CELF1 PE=1 SV=2 - [CELF1_HUMAN]
Q96EP5		DAZAP1	388	399	233	40	228	36	1048	560	821	304	414	111	205	594	107	379	462	255	938	512	818	492	174	95	DAZ-associated protein 1 OS=Homo sapiens GN=DAZAP1 PE=1 SV=1 - [DAZP1_HUMAN]
Q9H6T0		ESRP2													955		1745										Epithelial splicing regulatory protein 2 OS=Homo sapiens GN=ESRP2 PE=1 SV=1 - [ESRP2_HUMAN]
Q92945		KHSRP	29	54	1646				1327	822	379	348	70	1477	69		51						1044	1658	21	141	Far upstream element-binding protein 2 OS=Homo sapiens GN=KHSRP PE=1 SV=4 - [FUBP2_HUMAN]
P17931		LGALS3	1857	1480	1528	1125	1565	1172	722	1341	982	1111	168	1423	681	417	430	351	914	886	205	897	140	1491	579	1207	Galectin-3 OS=Homo sapiens GN=LGALS3 PE=1 SV=5 - [LEG3_HUMAN]
O00422		SAP18	450	155	206	31	300	34	87	23	1632		1445	757	473		929		296	217	1564	1263	1132	1221			Histone deacetylase complex subunit SAP18 OS=Homo sapiens GN=SAP18 PE=1 SV=1 - [SAP18_HUMAN]
O60306		AQR	619	487	1076	706	865	925	684	913	262	35	1635	859	777	947	1006	793	181	166	886	529	1031	728	126	436	Intron-binding protein aquarius OS=Homo sapiens GN=AQR PE=1 SV=4 - [AQR_HUMAN]
Q07666		KHDRBS1	574	589	2	2	4	3	310	624	628	265	669	82	545	183	837	550	353	532	1219	583	794	1293	307	212	KH domain-containing, RNA-binding, signal transduction-associated protein 1 OS=Homo sapiens GN=KHDRBS1 PE=1 SV=1 - [KHDR1_HUMAN]
Q9UK59		DBR1	335	122	1326	910	1150	872	454	96	169	132	1424	1265	1718	1372	1652	1298	903	570	1127	596	1551	847	1537	1108	Lariat debranching enzyme OS=Homo sapiens GN=DBR1 PE=1 SV=2 - [DBR1_HUMAN]
P54105		CLNS1A	1959				1561				1559	1272			1599	1055	713	918	1572	1143	419	1209	180		644	714	Methylosome subunit pICln OS=Homo sapiens GN=CLNS1A PE=1 SV=1 - [ICLN_HUMAN]
Q9NR56		MBNL1	241	124					1150				1878		649		721	470					1431				Muscleblind-like protein 1 OS=Homo sapiens GN=MBNL1 PE=1 SV=2 - [MBNL1_HUMAN]
P55769		NHP2L1	367	453	875	861	459	898	347	288	1005	512	736	253	684	306	578	538	389	109	1190	797	612	829	196	84	NHP2-like protein 1 OS=Homo sapiens GN=NHP2L1 PE=1 SV=3 - [NH2L1_HUMAN]
Q15233		NONO	711	204	1214	866	83	769	465	711	63	1157	615	209	236	108	71	137	17	282	1010	1178	679	1144	156	29	Non-POU domain-containing octamer-binding protein OS=Homo sapiens GN=NONO PE=1 SV=4 - [NONO_HUMAN]
Q12972		PPP1R8	1273	1084	1206		306	473			1407	847	1892	1581					498		28		1698	1456	699	386	Nuclear inhibitor of protein phosphatase 1 OS=Homo sapiens GN=PPP1R8 PE=1 SV=2 - [PP1R8_HUMAN]
Q9H0G5		NSRP1			1570				315		26	125	89		611		698										Nuclear speckle splicing regulatory protein 1 OS=Homo sapiens GN=NSRP1 PE=1 SV=1 - [NSRP1_HUMAN]
P67809		YBX1	1507	901	202	1068	1099	1097	508	1199	953	789	103	1173	444	620	259	112	504	477	500	90	255	690	715	1174	Nuclease-sensitive element-binding protein 1 OS=Homo sapiens GN=YBX1 PE=1 SV=3 - [YBOX1_HUMAN]
O60936		NOL3									1605																Nucleolar protein 3 OS=Homo sapiens GN=NOL3 PE=1 SV=2 - [NOL3_HUMAN]
Q8WXF1		PSPC1															1922										Paraspeckle component 1 OS=Homo sapiens GN=PSPC1 PE=1 SV=1 - [PSPC1_HUMAN]
O75475		PSIP1	167	528	441	858	184	638	451	1105	699	150	597	72	279	221	498	260	132	195	774	522	705	134	96	13	PC4 and SFRS1-interacting protein OS=Homo sapiens GN=PSIP1 PE=1 SV=1 - [PSIP1_HUMAN]
Q9H814		PHAX	166	101	1024		485		1137	1286	1386	832	274	279	768	288	1037	736	713	1108	474	962	883	261	1022	512	Phosphorylated adapter RNA export protein OS=Homo sapiens GN=PHAX PE=1 SV=1 - [PHAX_HUMAN]
Q9H307		PNN	206	1594	162	26	141	49	93	380	120	102	429	1412	612	598	527	372	258	371	90	1137	1351	1461	495	217	Pinin OS=Homo sapiens GN=PNN PE=1 SV=4 - [PININ_HUMAN]
Q14331		FRG1											233														Protein FRG1 OS=Homo sapiens GN=FRG1 PE=1 SV=1 - [FRG1_HUMAN]
Q96PU8		QKI	1216	1227	12		20		222	814	1344		446	285	257	168	730	429	278	322	787	294	1836	1370			Protein quaking OS=Homo sapiens GN=QKI PE=1 SV=1 - [QKI_HUMAN]
Q14690		PDCD11	1308				1623						1916		1864		1834		79	69	1449	1300	30	1310			Protein RRP5 homolog OS=Homo sapiens GN=PDCD11 PE=1 SV=3 - [RRP5_HUMAN]
Q99590		SCAF11	199	806	896	554	693	128	1916	1558	190	114	832	470	230	256	240	252	245	883	603	907	1394	849	146	47	Protein SCAF11 OS=Homo sapiens GN=SCAF11 PE=1 SV=2 - [SCAFB_HUMAN]
Q9UPN6		SCAF8			197		875		18																		Protein SCAF8 OS=Homo sapiens GN=SCAF8 PE=1 SV=1 - [SCAF8_HUMAN]
P18583		SON									16	1270															Protein SON OS=Homo sapiens GN=SON PE=1 SV=4 - [SON_HUMAN]
Q8IY67		RAVER1	312	109	1377		999	753	56	768	712	406	142	22	234	219	371	423	331		1301		226	25	356		Ribonucleoprotein PTB-binding 1 OS=Homo sapiens GN=RAVER1 PE=1 SV=1 - [RAVR1_HUMAN]
Q15424		SAFB			1082	1226	1508	1258	1897	1555	1437	1027	1712	1504	682	1461	1676	1495	2		1577		1751		504	569	Scaffold attachment factor B1 OS=Homo sapiens GN=SAFB PE=1 SV=4 - [SAFB1_HUMAN]
Q9Y3F4		STRAP	1746	1287	191	1169	1422	1170	1383	1514	879	1104	82	1508	1270	836	665	731	1341	996	420	573	96	466	1065	536	Serine-threonine kinase receptor-associated protein OS=Homo sapiens GN=STRAP PE=1 SV=1 - [STRAP_HUMAN]
Q13573		SNW1	62	892	639	324	263	166	209	312	70	193	1275	510	958	1202	1487	1291	261	328	710	293	136	1153	427	190	SNW domain-containing protein 1 OS=Homo sapiens GN=SNW1 PE=1 SV=1 - [SNW1_HUMAN]
Q9P013		CWC15	589	1063	1100	566	1366				918	798	1794		1096		1657		159	910	937	880	456	85	1305		Spliceosome-associated protein CWC15 homolog OS=Homo sapiens GN=CWC15 PE=1 SV=2 - [CWC15_HUMAN]
Q8WXA9		SREK1	559	1015	1362		251	73			310	1216					444						495	1242	319		Splicing regulatory glutamine/lysine-rich protein 1 OS=Homo sapiens GN=SREK1 PE=1 SV=1 - [SREK1_HUMAN]
Q15020		SART3	1046	939	667	203	569	1008	1451	583	1313	969	1779	1161	1621	1288	1665	1201	1557		1323	1163	1781	1312	975	570	Squamous cell carcinoma antigen recognized by T-cells 3 OS=Homo sapiens GN=SART3 PE=1 SV=1 - [SART3_HUMAN]
Q14683		SMC1A	1408	695	609	690	159	819	287	459	1019	481	565	271	669	192	842	530	256	737	1064	997	1185	522	670	482	Structural maintenance of chromosomes protein 1A OS=Homo sapiens GN=SMC1A PE=1 SV=2 - [SMC1A_HUMAN]
Q8IWZ8		SUGP1											1927														SURP and G-patch domain-containing protein 1 OS=Homo sapiens GN=SUGP1 PE=1 SV=2 - [SUGP1_HUMAN]
Q8IX01		SUGP2	1600																				1634				SURP and G-patch domain-containing protein 2 OS=Homo sapiens GN=SUGP2 PE=1 SV=2 - [SUGP2_HUMAN]
O75940		SMNDC1	201	104			1342		1277	507			1192	408									522	801	523	204	Survival of motor neuron-related-splicing factor 30 OS=Homo sapiens GN=SMNDC1 PE=1 SV=1 - [SPF30_HUMAN]
Q13148		TARDBP	889	468	271	471	414	466	734	961	282	725	640	96	267	207	511	375	267	432	804	938	968	644	250	227	TAR DNA-binding protein 43 OS=Homo sapiens GN=TARDBP PE=1 SV=1 - [TADBP_HUMAN]
Q9Y2W1		THRAP3	445	126	487	337	403	571	1598	1405	103	113	846	823	41	722	108	286	352	748	1071		282	236	108	68	Thyroid hormone receptor-associated protein 3 OS=Homo sapiens GN=THRAP3 PE=1 SV=2 - [TR150_HUMAN]
P62995		TRA2B			243	371	56	145			553	1262													218		Transformer-2 protein homolog beta OS=Homo sapiens GN=TRA2B PE=1 SV=1 - [TRA2B_HUMAN]
Q9Y2W2		WBP11	116	1414	359	62	93	95	39	213	900	378	41	165	678	196	414	417	675	933	1080	1250	308	884	368	232	WW domain-binding protein 11 OS=Homo sapiens GN=WBP11 PE=1 SV=1 - [WBP11_HUMAN]
Q96MU7		YTHDC1	214	115					1149	1293	1432	954	622		327	126	144	544					1503				YTH domain-containing protein 1 OS=Homo sapiens GN=YTHDC1 PE=1 SV=3 - [YTDC1_HUMAN]
P55265	mRNA Modification	ADAR	118		1603	1191	1404	1252	43	126			466	63	367	1286	584	1371	430	835	705	153	1731		602	430	Double-stranded RNA-specific adenosine deaminase OS=Homo sapiens GN=ADAR PE=1 SV=4 - [DSRAD_HUMAN]
Q86U44		METTL3											1479														N6-adenosine-methyltransferase 70 kDa subunit OS=Homo sapiens GN=METTL3 PE=1 SV=2 - [MTA70_HUMAN]
Q6P6C2		ALKBH5	27	9	1505		1589								1831		428		918		1368		1140	1046			RNA demethylase ALKBH5 OS=Homo sapiens GN=ALKBH5 PE=1 SV=2 - [ALKB5_HUMAN]
Q9UQ88	Cyclin/CDK	CDK11A			371	81	737		132				135	65	750	825	1129	1353	1124		1457						Cyclin-dependent kinase 11A OS=Homo sapiens GN=CDK11A PE=1 SV=4 - [CD11A_HUMAN]
Q9NYV4		CDK12	1246	777	209	711	343	87	338		728		372		219	38	176	62	98	120	1163		1846		101	168	Cyclin-dependent kinase 12 OS=Homo sapiens GN=CDK12 PE=1 SV=2 - [CDK12_HUMAN]
Q14004		CDK13	1851	1307	711	611	248	143							423		1275		58	140	217	115	1770				Cyclin-dependent kinase 13 OS=Homo sapiens GN=CDK13 PE=1 SV=2 - [CDK13_HUMAN]
P50613		CDK7	910												1734		1675		1093		1414		1720	1082			Cyclin-dependent kinase 7 OS=Homo sapiens GN=CDK7 PE=1 SV=1 - [CDK7_HUMAN]
P50750		CDK9					903								1018		1288								851		Cyclin-dependent kinase 9 OS=Homo sapiens GN=CDK9 PE=1 SV=3 - [CDK9_HUMAN]
P14635		CCNB1	2025						27	42			396		889		739				1610						G2/mitotic-specific cyclin-B1 OS=Homo sapiens GN=CCNB1 PE=1 SV=1 - [CCNB1_HUMAN]
O60563		CCNT1	1297		401	420	1067	1159	441	758	1003		177	417			857		680		209		911	593	405	348	Cyclin-T1 OS=Homo sapiens GN=CCNT1 PE=1 SV=1 - [CCNT1_HUMAN]
P51946		CCNH	242	69					311	223			1390	762	799	1157	1732						909	419			Cyclin-H OS=Homo sapiens GN=CCNH PE=1 SV=1 - [CCNH_HUMAN]
P51948		MNAT1	127	32									748										184	560			CDK-activating kinase assembly factor MAT1 OS=Homo sapiens GN=MNAT1 PE=1 SV=1 - [MAT1_HUMAN]
P32780	General Transcription Factor	GTF2H1	1850						178				49										1275				General transcription factor IIH subunit 1 OS=Homo sapiens GN=GTF2H1 PE=1 SV=1 - [TF2H1_HUMAN]
P19447		ERCC3													866		393										TFIIH basal transcription factor complex helicase XPB subunit OS=Homo sapiens GN=ERCC3 PE=1 SV=1 - [ERCC3_HUMAN]
P18074		ERCC2													744		126		172		709	1177					TFIIH basal transcription factor complex helicase XPD subunit OS=Homo sapiens GN=ERCC2 PE=1 SV=1 - [ERCC2_HUMAN]
P35269		GTF2F1	35	13	587	412	192	518	68	268	64	607	685	694	224	425	846	1049	416	213	466	108	210	1485	309	142	General transcription factor IIF subunit 1 OS=Homo sapiens GN=GTF2F1 PE=1 SV=2 - [T2FA_HUMAN]
P13984		GTF2F2	61	24	636	505	249	559	134	101	229	37	964	229	741	552	811	663	236	111	837	557	510	82	472	161	General transcription factor IIF subunit 2 OS=Homo sapiens GN=GTF2F2 PE=1 SV=2 - [T2FB_HUMAN]
P24928	RNA Polymerase Subunit	POLR2A	719	1223	869	200	495	242	656	110	193	75	793	190	590	315	1027	591	672	719	700	180	1757	1513	686	313	DNA-directed RNA polymerase II subunit RPB1 OS=Homo sapiens GN=POLR2A PE=1 SV=2 - [RPB1_HUMAN]
P30876		POLR2B	1316	825	106	466	866	775	1211	651	1219	793	1587	1124	954	1283	1195	1335	751	399	844	981	763	1024	791	366	DNA-directed RNA polymerase II subunit RPB2 OS=Homo sapiens GN=POLR2B PE=1 SV=1 - [RPB2_HUMAN]
P19387		POLR2C			1309		1238		1254		1171		1047	723	1609		1569				686						DNA-directed RNA polymerase II subunit RPB3 OS=Homo sapiens GN=POLR2C PE=1 SV=2 - [RPB3_HUMAN]
P62487		POLR2G																					1736				DNA-directed RNA polymerase II subunit RPB7 OS=Homo sapiens GN=POLR2G PE=1 SV=1 - [RPB7_HUMAN]
P36954		POLR2I	940	560	181	60	974		1879		46	184	1766	1550	663	474	779	574					1398	1248	663	344	DNA-directed RNA polymerase II subunit RPB9 OS=Homo sapiens GN=POLR2I PE=1 SV=1 - [RPB9_HUMAN]
P19388		POLR2E	916	548	954	522	221	663	479	848	490	160	1123	399	598	311	924	563	596	317	1105	423	1139	607	437	184	DNA-directed RNA polymerases I, II, and III subunit RPABC1 OS=Homo sapiens GN=POLR2E PE=1 SV=4 - [RPAB1_HUMAN]
P61218		POLR2F	204	489	477				1534	962			1396	1347	1828		1444						451	904	1349		DNA-directed RNA polymerases I, II, and III subunit RPABC2 OS=Homo sapiens GN=POLR2F PE=1 SV=1 - [RPAB2_HUMAN]
P52434		POLR2H	378	1083	346		925				1465												482	1381	1086		DNA-directed RNA polymerases I, II, and III subunit RPABC3 OS=Homo sapiens GN=POLR2H PE=1 SV=4 - [RPAB3_HUMAN]
P53803		POLR2K	592	387					580	612	1236		525	1141									1985				DNA-directed RNA polymerases I, II, and III subunit RPABC4 OS=Homo sapiens GN=POLR2K PE=2 SV=1 - [RPAB4_HUMAN]
P62875		POLR2L	1099	402					1210	1151	272	47	1628	1155	1627		1605	1451	1425		1402		1561	993	786		DNA-directed RNA polymerases I, II, and III subunit RPABC5 OS=Homo sapiens GN=POLR2L PE=1 SV=1 - [RPAB5_HUMAN]
Q9NP77	RNA Polymerae II-Associated	SSU72	365	1505					1984				478						889	1272	1261	751	501	1556			RNA polymerase II subunit A C-terminal domain phosphatase SSU72 OS=Homo sapiens GN=SSU72 PE=1 SV=1 - [SSU72_HUMAN]
Q8N7H5		PAF1	1901		886	701	1304		14	21	579		1478	1021	1224	629	827	1062					1657	1150	33		RNA polymerase II-associated factor 1 homolog OS=Homo sapiens GN=PAF1 PE=1 SV=2 - [PAF1_HUMAN]
Q6P1J9		CDC73	1478		266	79	542	279	206	467	992	396	1355	919	484	781	1227	797	329		1635		1829		193	32	Parafibromin OS=Homo sapiens GN=CDC73 PE=1 SV=1 - [CDC73_HUMAN]
Q6PD62		CTR9	106	1609	1398	940	91	24	189	1420			29	939	159		79				760	709	1509	1656	324		RNA polymerase-associated protein CTR9 homolog OS=Homo sapiens GN=CTR9 PE=1 SV=1 - [CTR9_HUMAN]
Q8WVC0		LEO1	1248	624	1271	653	792	516	272	263	624	440	1570	1125	574	1406	1601	1450	187	149	1546		1277	929	404	850	RNA polymerase-associated protein LEO1 OS=Homo sapiens GN=LEO1 PE=1 SV=1 - [LEO1_HUMAN]
P18615		NELFE	911	1456	1482	974	1117	598	123	25	55	8	737	811	757	531	1317	1039	487	177	1199	912	1891	1597	882	476	Negative elongation factor E OS=Homo sapiens GN=NELFE PE=1 SV=3 - [NELFE_HUMAN]
O00267		SUPT5H	551	577	721	619	619	751	1469	637	977	719	1690	1256	1710	1323	1670	1323	1195	852	1436	1015	728	1186	868	628	Transcription elongation factor SPT5 OS=Homo sapiens GN=SUPT5H PE=1 SV=1 - [SPT5H_HUMAN]
Q7KZ85		SUPT6H	277	454	151	50	101	54	1225	1121	822	611	1870	1344	157	581	1449	1106	447	153	577	125	434	742	1225		Transcription elongation factor SPT6 OS=Homo sapiens GN=SUPT6H PE=1 SV=2 - [SPT6H_HUMAN]
O43719		HTATSF1	210	308	1473		1455	1072	1053	866	1206	647	1488	870	1522		1547		924	460	1241	1065	1208	1565			HIV Tat-specific factor 1 OS=Homo sapiens GN=HTATSF1 PE=1 SV=1 - [HTSF1_HUMAN]
Q96ST2		IWS1			1561		1157		1708	1365			1101	1409	46		1084		972		1086	1223	340	76	695		Protein IWS1 homolog OS=Homo sapiens GN=IWS1 PE=1 SV=2 - [IWS1_HUMAN]
Q8N163		KIAA1967	1385	924	1201	353	415	870	975	873	1329	747	1461	788	1508	1104	1711	1202	1400	1150	1455	1171	1632	1163	768	779	DBIRD complex subunit KIAA1967 OS=Homo sapiens GN=KIAA1967 PE=1 SV=2 - [K1967_HUMAN]
P0DMV8	Protein Folding	HSPA1A									711	600															Heat shock 70 kDa protein 1A OS=Homo sapiens GN=HSPA1A PE=1 SV=1 - [HS71A_HUMAN]
P11142		HSPA8	1367	739	1174	369	923	334	789	160	709	413	928	156	807	348	1093	613	880	514	1012	479	1470	722	746	515	Heat shock cognate 71 kDa protein OS=Homo sapiens GN=HSPA8 PE=1 SV=1 - [HSP7C_HUMAN]
O75937		DNAJC8	134	142	1157	658	1091	494	1445		147	28	579	457	339	124	271	347	1519		703	569	1118	695	452	307	DnaJ homolog subfamily C member 8 OS=Homo sapiens GN=DNAJC8 PE=1 SV=2 - [DNJC8_HUMAN]
Q6UX04		CWC27	308	1317					316	702			1169	915	623		1579		620	238	660	427	1133	898	562		Peptidyl-prolyl cis-trans isomerase CWC27 homolog OS=Homo sapiens GN=CWC27 PE=1 SV=1 - [CWC27_HUMAN]
Q9UNP9		PPIE	623	168	531	232	1281		589	89	819	531	1144	813	894	1222	1139	807	567	314	491	225	453	54	866	811	Peptidyl-prolyl cis-trans isomerase E OS=Homo sapiens GN=PPIE PE=1 SV=1 - [PPIE_HUMAN]
O43447		PPIH	379	993	1228	931	648	188	547	111	346	745	886	491	269	184	538	263	471	150	810	378	640	1276	848	360	Peptidyl-prolyl cis-trans isomerase H OS=Homo sapiens GN=PPIH PE=1 SV=1 - [PPIH_HUMAN]
Q9Y3C6		PPIL1	840	555	644	281	284	126	466	59	773	343	1489	951	809	558	1034	580	359	332	283	747	767	238	836	371	Peptidyl-prolyl cis-trans isomerase-like 1 OS=Homo sapiens GN=PPIL1 PE=1 SV=1 - [PPIL1_HUMAN]
Q9H2H8		PPIL3	803	1310	1343		1121		953	456	111	21	1821	1252					432		647		1521	1433	832		Peptidyl-prolyl cis-trans isomerase-like 3 OS=Homo sapiens GN=PPIL3 PE=1 SV=1 - [PPIL3_HUMAN]
Q96BP3		PPWD1	1291	532	1304		610	599	192	164	296		1343	648	931	710	1151	1078	802	877	1041	469	1811	1321	722		Peptidylprolyl isomerase domain and WD repeat-containing protein 1 OS=Homo sapiens GN=PPWD1 PE=1 SV=1 - [PPWD1_HUMAN]
Q5VTR2	E3 Ligase	RNF20	626	434	153	1202	607		1372	1452			1894	1501	1658	1390	1620	1088	654	731	715	1160	553	1519	1425	780	E3 ubiquitin-protein ligase BRE1A OS=Homo sapiens GN=RNF20 PE=1 SV=2 - [BRE1A_HUMAN]
O75150		RNF40	964	1207	605	606	547	295	1408	403	268	581	1524	1174	1602	1251	1712	1292	753	422	1139	591	1373	1210	719	952	E3 ubiquitin-protein ligase BRE1B OS=Homo sapiens GN=RNF40 PE=1 SV=4 - [BRE1B_HUMAN]
O43660		PLRG1	265	116	554	165	138	623	1294	907	227	1124	344	49	386	271	611	392	135	272	256	562	447	127	360	248	Pleiotropic regulator 1 OS=Homo sapiens GN=PLRG1 PE=1 SV=1 - [PLRG1_HUMAN]
Q5W0B1	Zinc Finger	RNF219											1086														RING finger protein 219 OS=Homo sapiens GN=RNF219 PE=1 SV=1 - [RN219_HUMAN]
Q6PJT7		ZC3H14	163	229	728	105	690	656	203	971	104	593	573	77	259	357	378	424	435		1566		346	162	532		Zinc finger CCCH domain-containing protein 14 OS=Homo sapiens GN=ZC3H14 PE=1 SV=1 - [ZC3HE_HUMAN]
Q6NZY4		ZCCHC8	1176	636					425	852	830		933	448	591		291	496	883				1101	533			Zinc finger CCHC domain-containing protein 8 OS=Homo sapiens GN=ZCCHC8 PE=1 SV=2 - [ZCHC8_HUMAN]
O75312		ZNF259	1887						1875										1659				713				Zinc finger protein ZPR1 OS=Homo sapiens GN=ZNF259 PE=1 SV=1 - [ZPR1_HUMAN]
O95218		ZRANB2	361	152	467	617	328	677	409	67	513	526	1196	1071	685	251	1117	575	635	350	1065	500	567	1098	396	340	Zinc finger Ran-binding domain-containing protein 2 OS=Homo sapiens GN=ZRANB2 PE=1 SV=2 - [ZRAB2_HUMAN]
Q6L8Q7		PDE12	1534	1350	465	350	686	168	111	1211	1092	741	1840	1187	631	1266	1514	1366	1171	622	901	384	1791	1384	940	656	2',5'-phosphodiesterase 12 OS=Homo sapiens GN=PDE12 PE=1 SV=2 - [PDE12_HUMAN]
Q8WYA6		CTNNBL1	554	185	800	650	87	449	231	534	674	212	1092	733	387	123	1022	680	685	417	1084	472	1597	890	296	210	Beta-catenin-like protein 1 OS=Homo sapiens GN=CTNNBL1 PE=1 SV=1 - [CTBL1_HUMAN]
Q9BQA1		WDR77	502	690	724	169	761	124	935	751	1100	543	1385	732	1376	998	1472	847	945	681	117	672	1113	456	994	442	Methylosome protein 50 OS=Homo sapiens GN=WDR77 PE=1 SV=1 - [MEP50_HUMAN]
O60828		PQBP1	517	147	31	16	31	20	150	46	242	148	494	401	706	248	838	626	397	93	809	297	993	564	243	128	Polyglutamine-binding protein 1 OS=Homo sapiens GN=PQBP1 PE=1 SV=1 - [PQBP1_HUMAN]
Q9Y312		AAR2	1283						593		1530		1028				1178						1104	1014			Protein AAR2 homolog OS=Homo sapiens GN=AAR2 PE=1 SV=2 - [AAR2_HUMAN]
O14744		PRMT5	1416	731	716	333	919	398	877	470	1022	619	1341	547	1177	901	1467	867	1166	977	1046	407	1603	870	1132	579	Protein arginine N-methyltransferase 5 OS=Homo sapiens GN=PRMT5 PE=1 SV=4 - [ANM5_HUMAN]
P41223		BUD31	426	955	124	47	105	35	702	198	1017	912	900	297	342	524	324	108	246	228	536	137	326	153	568	286	Protein BUD31 homolog OS=Homo sapiens GN=BUD31 PE=1 SV=2 - [BUD31_HUMAN]
Q96DF8		DGCR14																					431				Protein DGCR14 OS=Homo sapiens GN=DGCR14 PE=1 SV=1 - [DGC14_HUMAN]
Q9NY27		PPP4R2	1418	1524	680	244	1421		274	483	950	712	1853	1467	1527	1398	1719	1287	1565	1283	1204	1264	1905	1450	1402		Serine/threonine-protein phosphatase 4 regulatory subunit 2 OS=Homo sapiens GN=PPP4R2 PE=1 SV=3 - [PP4R2_HUMAN]
Q9BSV6		TSEN34							1859				473										155				tRNA-splicing endonuclease subunit Sen34 OS=Homo sapiens GN=TSEN34 PE=1 SV=1 - [SEN34_HUMAN]
Q7Z6J9		TSEN54							617																		tRNA-splicing endonuclease subunit Sen54 OS=Homo sapiens GN=TSEN54 PE=1 SV=3 - [SEN54_HUMAN]

## Sheet: B. 3rd-Z Ribosomal Proteins
	Color Scale: Top		0.04	4-10%	10-15%	15-20%	20-25%	>25%
			Rank by 3rd Z-score
	Accession	Gene Name	Imp-β	Trn-1	Trn-2	Trn-SR	Imp-4	Imp-5	Imp-7	Imp-8	Imp-9	Imp-11	Imp-13	Exp-4
40S Subunit	P08865	RPSA	494	349	389	826	233	620	457	211	349	190	171	527
	P15880	RPS2	642	364	472	245	421	429	347	218	293	96	128	678
	P23396	RPS3	677	451	514	734	498	624	387	158	342	361	417	514
	P61247	RPS3A	534	193	229	476	320	393	371	143	288	254	280	422
	P62701	RPS4X	576	239	197	488	296	383	325	129	244	315	245	379
	P46782	RPS5	546	298	182	345	385	400	465	83	206	148	214	387
	P62753	RPS6	373	340	328	362	333	403	377	246	179	107	178	475
	P62081	RPS7	472	189	341	424	522	341	340	179	31	355	260	370
	P62241	RPS8	520	346	254	423	323	303	266	185	336	128	278	377
	P46781	RPS9	563	312	332	429	195	422	368	140	237	233	265	423
	P46783	RPS10	283	276	174	701	380	501	419	105	296	110	159	441
	P62280	RPS11	707	305	271	400	366	325	430	165	287	189	336	424
	P25398	RPS12	499	319	324	543	463	442	426	209	324	309	316	439
	P62277	RPS13	593	380	173	451	392	476	310	175	218	179	219	372
	P62263	RPS14	508	528	626	627	430	439	367	131	300	287	241	412
	P62841	RPS15	782	433	383	367	472	360	399	163	382	414	389	409
	P62244	RPS15A	858	450	247	818	521	446	285	176	307	436	666	399
	P62249	RPS16	612	361	231	655	302	517	374	128	253	228	246	406
	P0CW22	RPS17L	865	492	485	647	332	315	314	171	286	321	684	495
	P62269	RPS18	477	217	319	653	471	513	321	130	242	192	253	398
	P39019	RPS19	610	359	307	572	321	544	395	157	303	372	230	420
	P60866	RPS20	380	155	207	785	658	573	373	197	277	126	217	508
	P63220	RPS21	511	246	371	538	376	515	390	116	331	296	262	506
	P62266	RPS23	507	197	253	260	407	256	223	151	199	176	440	410
	P62847	RPS24	644	317	318	675	297	608	453	180	243	319	399	392
	P62851	RPS25	530	415	428	874	171	653	381	269	223	172	368	414
	P62854	RPS26	391		1022		812		97	184			1251
	P42677	RPS27	639	245	134	614	492	432	423	160	273	99	235	684
	P62979	RPS27A		504	125	570	328	412	659	198	376	253	808	296
	P62857	RPS28	533	233	179	825	251	638	269	239	301	346	746	450
	P62273	RPS29	581	302	404	741	375	579	382	115	340	595	523	507
	P62861	FAU(RPS30)	512	261	187		388	459	570	156	271	326	378	479
60S Subunit	P05388	RPLP0	404	280	451	368	580	452	297	419	488	149	551	592
	P05386	RPLP1	362	229	90	778	186	615	504	320	266	73	374	443
	P05387	RPLP2	430	134	148	185	334	259	205	332	411	55	286	395
	P39023	RPL3	361	731	80	294	146	181	216	164	144	154	325	188
	P36578	RPL4	340	652	96	285	288	171	405	196	60	136	186	166
	P46777	RPL5	376	136	185	181	361	247	478	480	279	118	191	446
	Q02878	RPL6	225	656	64	334	245	226	363	226	90	268	269	171
	P18124	RPL7	235	662	127	332	272	198	240	114	95	239	251	179
	Q6DKI1	RPL7L1
	P62424	RPL7A	378	657	111	371	111	292	228	113	50	314	470	130
	P62917	RPL8	312	589	151	355	298	201	260	194	104	112	274	160
	P32969	RPL9	449	572	224	356	338	240	255	200	146	147	206	122
	P27635	RPL10	418	517	161	464	569	312	389	182	178	216	411	294
	P62906	RPL10A	323	720	368	281	282	177	439	166	105	98	375	138
	P62913	RPL11	345	602	47	413	455	340	194	7	59	69	64	225
	P30050	RPL12	328	584	438	251	373	195	78	408	143	59	173	201
	P26373	RPL13	294	640	102	306	344	168	352	210	67	152	311	120
	P40429	RPL13A	356	708	89	365	269	280	436	237	97	164	119	162
	P50914	RPL14	579	534	59	322	853	249	171	167	86	94	204	135
	P61313	RPL15	221	751	76	341	252	187	394	256	45	145	380	156
	P18621	RPL17	230	683	140	330	524	148	237	141	129	290	220	226
	Q07020	RPL18	365	620	103	336	139	282	441	155	62	167	145	169
	Q02543	RPL18A	306	587	98	595	919	140	185	101	73	49	566	199
	P84098	RPL19	771	647	84	439	347	149	249	420	190	248	562	203
	P46778	RPL21	320	630	97	300	151	208	332	190	171	258	150	53
	P35268	RPL22	432	623	38	229	856	55	105	8	68	402	539	240
	P62829	RPL23	368	596	312	313	241	290	397	245	79	208	234	250
	P62750	RPL23A	416	439	48	370	546	186	106	132	39	435	579	233
	P83731	RPL24	627	441	245	438	264	233	166	280	148	186	618	235
	P61254	RPL26		612	205	227	218	155	89	90	56	329	1049	558
	Q9UNX3	RPL26L1					883
	P61353	RPL27	282	847	109	242	493	179	197	119	53	299	370	133
	P46776	RPL27A	254	474	65	331	362	203	484	202	27	109	448	131
	P46779	RPL28	1099	665	217	755	592	326	307	109	161	1144	438	134
	P47914	RPL29	343	598	99	377	144	183	273	199	54	144	201	280
	P62888	RPL30	259	586	63	301	174	162	229	54	83	328	176	198
	P62899	RPL31	246	769	70	485	734	173	302	78	126	467	91	222
	P62910	RPL32	249	735	37	533	59	193	550	389	107	415	406	119
	P49207	RPL34	395			495	429	322	334	341	136	47	117	275
	P42766	RPL35	326	753	107	652	227	269	431	154	99	66	540	144
	P18077	RPL35A	278	315		698	724	310	236	135	40	32	587	164
	Q9Y3U8	RPL36	615	642	228	302	232	330	910	142	52	325	465	228
	P83881	RPL36A	877								103	95	1059
	Q969Q0	RPL36AL		698	135	629	29	601	472	201				151
	P61927	RPL37	74										23
	P61513	RPL37A	867	521	92	430	489	232	235	100	215	175	661	94
	P63173	RPL38	405	481	223	465	175	287	335	124	116	177	608	109

## Sheet: C. Transcription Factor Summary
Term ID	Term Name	Imp-β		Trn-1		Trn-2		Trn-SR		Imp-4		Imp-5		Imp-7		Imp-8		Imp-9		Imp-11		Imp-13		Exp-4		Total No.
		p	#	p	#	p	#	p	#	p	#	p	#	p	#	p	#	p	#	p	#	p	#	p	#
GO:0006259	DNA Metabolic Process	0.00017	8	0.0693	5	1.24e-05	8	0.844	4	5.56e-05	7	0.361	4	0.0129	6	1	3	0.00374	6	0.285	4	1	3	1	2	978
GO:0006310	DNA Recombination	1	2	1	2	0.511	3			0.00562	4			0.0246	4	1	1	1	2	1	1	1	1	1	1	298
GO:0033151	V(D)J Recombination									0.0164	2			0.0372	2											14
GO:0006265	DNA Topological Change									0.00648	2			0.0147	2											9
GO:0000737	DNA Catabolic Process, Endonucleolytic									0.0454	2			0.103	2											23
GO:0051276	Chromosome Organization	2.5e-09	12	0.135	5	1	4	0.00628	6	0.00339	6	1	2	0.00183	7	1	2	0.00838	6	0.00119	6	0.00134	7	1	3	1126
GO:0006325	Chromatin Organization	1.07e-09	11	0.412	4	0.578	4	0.0171	5	0.0102	5	1	2	0.0614	5	1	1	0.0219	5	0.00429	5	0.000102	7	1	3	768
GO:0016568	Chromatin Modification	4e-09	10	1	3	0.247	4	0.144	4	1	2	1	1	1	3	1	1	0.00743	5	1	2	2.22e-05	7	1	2	614
GO:0016570	Histone Modification	0.0102	5	1	2	0.062	4	0.972	3	1	1			1	2	1	1	1	2	1	2	0.00291	5	1	2	429
GO:0016575	Histone Deacetylation	1	1			1	1							1	1	1	1	1	1	0.277	2	0.00784	3	0.209	2	68
GO:0006337	Nucleosome Disassembly	4.62e-07	4					1	1	1	1			1	1			1	1			0.0484	2			17
GO:0032392	DNA Geometric Change	1	1							0.347	2			0.00738	3											63
GO:0006281	DNA Repair	1	3	1	1	0.13	4	1	2	0.0495	4			0.212	4	1	1	0.0917	4	0.722	3	1	2	1	1	519
GO:0051103	DNA Ligation Involved in DNA Repair									0.0081	2			0.0184	2											10
GO:0006397	mRNA Processing	1.02e-08	9	2e-10	9	6.22e-12	10	6.01e-07	7	2.83e-07	7	1	1	2.32e-11	10	8.28e-06	6	8.55e-07	7	1	2	0.000114	6	0.000167	5	454
GO:0048255	mRNA Stabilization			0.143	2					1	1	0.0782	2	0.228	2	0.0782	2					0.000946	3	0.0518	2	34
GO:0018205	Peptidyl-Lysine Modification	0.00709	5	1	1	1	3	0.0268	4	1	2			1	1			1	1	1	2	1	3			398
GO:0006511	Ubiquitin-Dependent Protein Catabolic Process	1	1	1	1	1	1	1	1	1	1			1	1					0.0385	4	1	1			582
GO:0051169	Nuclear Transport	1	2	1	3	1	2	1	2	1	2	1	2	0.00435	5	1	2	1	3	0.456	3	0.00341	5	1	2	443
GO:0016482	Cytoplasmic Transport	1	3	1	3	1	3	1	3	1	4	1	3	0.0531	6	1	2	1	4	0.00225	6	1	4	0.444	4	1257
GO:0008283	Cell Proliferation	1	5	1	3	1	3	1	2	0.902	5	0.531	5	0.652	6	1	3	1	5	0.00193	7	0.0549	7	1	3	1990
GO:0001935	Endothelial Cell Proliferation	1	1							0.0136	3			0.0428	3			1	1	1	1			1	1	113
GO:0032502	Developmental Process	2.05e-07	19	0.000199	13	0.00534	12	6.14e-07	15	0.18	9	4.13e-06	13	4.13e-07	17	6.27e-05	12	0.015	11	0.000376	11	0.000224	14	1	6	5934
GO:0048731	System Development	0.00167	13	1	7	0.147	9	0.000555	11	1	7	1	5	0.000123	13	0.538	7	0.484	8	0.0426	8	0.0428	10	1	5	4482
GO:0048468	Cell Development	1	4	0.0377	7	1	5	1	4	0.158	6	0.883	5	1	4	1	3	1	2	0.665	5	0.0114	8	1	2	2225
GO:0009888	Tissue Development	1	6	1	3	1	4	0.000453	8	1	3	1	3	1	4	1	4	1	3	0.018	6	0.0296	7	1	2	1807
GO:0050872	White Fat Cell Differentiation																			0.0112	2					14
GO:0001649	Osteoblast Differentiation	0.494	3			1	2	1	1	1	2	1	2	0.00609	4	0.0599	3	1	2	1	2			1	2	209
GO:0061061	Muscle Structure Development	0.0487	5	0.154	4	0.00977	5	0.00495	5	1	3	1	3	0.018	5	0.0531	4	1	3	1	2	0.0141	5	1	2	594
GO:0022008	Neurogenesis	1	5	1	2	1	2	0.771	5	0.0386	6	1	1	1	3	1	1	1	2	1	1	1	3	1	2	1727
GO:0007399	Nervous System Development	0.132	8	1	2	1	3	0.00404	8	0.248	6	1	1	1	6	1	4	1	2	1	2	1	4	1	2	2418
GO:0030901	Midbrain Development	1	1							1	1			0.0209	3	0.54	2	1	1	1	1			1	1	89
GO:0048732	Gland Development	1	2							1	1			1	1			1	1	0.017	4	1	1	1	1	472
GO:0009790	Embryo Development	0.0559	6	1	2	1	1	0.000165	7	1	1	1	2	1	4	1	3	1	3	1	2	1	3	1	1	1030
GO:0048511	Rhythmic Process	0.1	4	1	1	1	2	1	2	1	2	1	2	1	3	0.00647	4	0.612	3	0.00507	4	0.0364	4	1	1	347
GO:0032922	Circadian Regulation of Gene Expression	1	1							1	1	1	1	1	1	1	1	1	1	0.00123	3	0.643	2			61
GO:0012501	Programmed Cell Death	0.222	7	1	5	1	3	0.00072	8	0.0699	6	0.00234	7	0.0055	8	1	4	1	4	0.338	5	1.06e-06	11	1	3	1921
GO:0030262	Apoptotic Nuclear Changes									0.0779	2			0.000763	3									1	1	30
GO:0006309	Apoptotic DNA Fragmentation									0.0275	2			0.0624	2											18
GO:0097190	Apoptotic Signaling Pathway	1	2	1	1	1	1	1	3	1	3	1	2	0.482	4	1	2	1	1	1	2	0.000884	6			644
GO:0072332	Intrinsic Apoptotic Signaling Pathway by p53 Class Mediator	1	2			1	1	0.00551	3	0.492	2	1	1	0.0125	3	0.384	2	1	1	0.336	2	0.971	2			75
GO:0050896	Response to Stimulus	0.00391	17	0.465	11	0.000115	16	0.00745	13	0.00185	13	0.00363	12	0.000119	17	1	8	0.00192	14	2.17e-08	16	5.56e-05	17	0.000251	12	8574
GO:0070887	Cellular Response to Chemical Stimulus	0.413	8	1	4	1	4	0.0136	8	0.00608	8	1	4	1	6	1	3	1	5	0.0015	8	0.0686	8	1	4	2852
GO:0010033	Response to Organic Substance	0.594	8	1	3	1	4	0.185	7	0.0939	7	1	3	1	4	1	3	1	5	0.0292	7	0.012	9	1	4	3009
GO:0006950	Response to Stress	0.973	9	1	6	0.0736	9	1	6	0.0853	8	0.311	7	0.00385	11	1	5	1	7	0.0223	8	0.00243	11	1	5	4101
GO:0006974	Cellular Response to DNA Damage Stimulus	0.211	5	1	1	0.0436	5	0.417	4	0.0133	5			0.00443	6	1	2	0.0284	5	1	3	0.94	4	1	1	811
GO:0051017	Actin Filament Bundle Assembly			1	2							1	2							0.916	2	0.0476	3			124
GO:0007165	Signal Transduction	1	10	1	6	1	9	0.008	11	0.165	9	0.0629	9	1	9	1	6	0.0941	10	0.000334	11	0.00161	13	0.00093	10	5865
GO:0030518	Intracellular Steroid Hormone Receptor Signaling Pathway	0.00186	4	1	2	0.000489	4	0.0262	3	1	1	1	2	1	2	1	2	0.000343	4	1	1	0.00066	4	5.22e-05	4	126
GO:0031958	Corticosteroid Receptor Signaling Pathway	1	1			1	1											1	1			1	1	0.0158	2	19
GO:0042921	Glucocorticoid Receptor Signaling Pathway	1	1			1	1											1	1			1	1	0.0126	2	17
GO:0030521	Androgen Receptor Signaling Pathway	0.0139	3	0.492	2	0.00499	3	0.44	2	1	1	0.271	2	0.785	2	0.271	2	0.492	2			0.00622	3	0.18	2	63
GO:0030520	Intracellular Estrogen Receptor Signaling Pathway	0.678	2			0.33	2	0.244	2					1	1	1	1	0.00156	3	1	1	1	1	0.0997	2	47
GO:0048384	Retinoic Acid Receptor Signaling Pathway	1	1	1	1			0.335	2	1	1	1	1							0.181	2	0.00412	3			55
GO:0007154	Cell Communication	1	11	1	6	1	9	0.0192	11	0.331	9	0.129	9	1	10	1	6	0.032	11	0.000839	11	0.0045	13	0.00016	11	6420
GO:0032606	Type I Interferon Production							0.0268	3	1	2			0.0607	3											127
	No. in Top 15%		36		25		27		24		22		20		30		20		25		19		29		17

## Sheet: D. 2nd-Z-15% Transcription Fact
Term ID	Term Name	Term Depth	Imp-β		Trn-1		Trn-2		Trn-SR		Imp-4		Imp-5		Imp-7		Imp-8		Imp-9		Imp-11		Imp-13		Exp-4		Total No.
			p-value	# in 36	p-value	# in 25	p-value	# in 27	p-value	# in 24	p-value	# in22	p-value	# in 20	p-value	# in 30	p-value	# in 20	p-value	# in 25	p-value	# in 19	p-value	# in 29	p-value	# in 17
GO:0008150	biological_process	1	2.53e-17	36	2.52e-11	25	2.05e-12	27	8.7e-11	24	1.04e-09	22	1.25e-08	20	4.83e-14	30	1.25e-08	20	2.52e-11	25	4.34e-08	19	1.61e-13	29	5.24e-07	17	16994
GO:0040007	growth	2	1	4	1	1	1	3	1	2	1	1	1	2	1	3	1	2	1	2	1	3	0.0114	6	1	2	1004
GO:0023052	signaling	2	1	10	1	6	1	9	0.0172	11	0.303	9	0.118	9	1	10	1	6	0.0287	11	0.000747	11	0.00395	13	0.000142	11	6347
GO:0051704	multi-organism process	2	0.000225	11	1	4	1	5	2.24e-05	10	1	5	1	4	1.59e-06	12	1	4	1	5	1	3	0.00241	9	1	2	2473
GO:0044419	interspecies interaction between organisms	3	8.67e-08	10	1	2	0.0518	5	4.17e-05	7	0.317	4	1	3	3.53e-07	9	1	2	0.581	4	1	1	0.000189	7	1	2	841
GO:0044403	symbiosis, encompassing mutualism through parasitism	4	8.67e-08	10	1	2	0.0518	5	4.17e-05	7	0.317	4	1	3	3.53e-07	9	1	2	0.581	4	1	1	0.000189	7	1	2	841
GO:0051701	interaction with host	4							1	1																	193
GO:0051702	interaction with symbiont	4	0.0087	3					0.323	2	1	1			1	1							0.504	2	1	1	54
GO:0032501	multicellular organismal process	2	4.56e-05	18	0.00195	13	0.0403	12	7.06e-07	16	1	8	0.000549	12	7.82e-05	16	0.000549	12	0.535	10	0.00024	12	0.00033	15	1	6	7212
GO:0003008	system process	3					1	1	1	1					1	1			1	3	1	1	1	1	1	2	2065
GO:0003012	muscle system process	4					1	1							1	1			1	2	1	1	1	1	1	2	398
GO:0006936	muscle contraction	5													1	1			1	1	1	1	1	1	1	1	328
GO:0006941	striated muscle contraction	6													1	1			1	1	1	1			1	1	150
GO:0006939	smooth muscle contraction	6																					1	1			102
GO:0090075	relaxation of muscle	5																					1	1			29
GO:0044557	relaxation of smooth muscle	6																					1	1			10
GO:0050877	neurological system process	4							1	1									1	1			1	1			1347
GO:0007600	sensory perception	5							1	1													1	1			995
GO:0050951	sensory perception of temperature stimulus	6																					1	1			21
GO:0050954	sensory perception of mechanical stimulus	6							1	1													1	1			164
GO:0007605	sensory perception of sound	7							1	1																	147
GO:0019233	sensory perception of pain	6																					1	1			105
GO:0050890	cognition	5																	1	1							274
GO:0003013	circulatory system process	4													1	1			1	1	1	1			1	1	521
GO:0003015	heart process	5													1	1			1	1	1	1			1	1	265
GO:0008015	blood circulation	5													1	1			1	1	1	1			1	1	518
GO:0060047	heart contraction	6													1	1			1	1	1	1			1	1	263
GO:0060048	cardiac muscle contraction	7													1	1			1	1	1	1			1	1	114
GO:0044706	multi-multicellular organism process	3	1	1					1	1																	259
GO:0022610	biological adhesion	2	1	1	1	2			1	1	1	1	1	2	1	2			1	1	1	4	1	4	1	1	1467
GO:0007155	cell adhesion	3	1	1	1	2			1	1	1	1	1	2	1	2			1	1	1	4	1	4	1	1	1461
GO:0098609	cell-cell adhesion	4									1	1			1	2			1	1	1	1	1	1	1	1	906
GO:0031589	cell-substrate adhesion	4			1	2							1	2							1	2	1	2			311
GO:0007160	cell-matrix adhesion	5			1	1							1	1							1	1	1	1			201
GO:0007610	behavior	2	1	2							1	2			1	2			1	2	1	2			1	1	770
GO:0007626	locomotory behavior	3	1	1																	1	1					206
GO:0000003	reproduction	2	1	2	1	2	1	1	1	2	1	2	1	1	1	4	1	3	1	1	1	3	1	2			1403
GO:0032504	multicellular organism reproduction	3	1	2	1	2			1	1	1	1	1	1	1	3	1	2	1	1	1	2	1	2			823
GO:0040011	locomotion	2	1	3	1	2			1	1	1	4	1	1	1	4	1	1	1	2	1	4	1	3	1	2	1853
GO:0052192	movement in environment of other organism involved in symbiotic interaction	3							1	1																	118
GO:0051828	entry into other organism involved in symbiotic interaction	4							1	1																	118
GO:0051806	entry into cell of other organism involved in symbiotic interaction	5							1	1																	118
GO:0052126	movement in host environment	4							1	1																	118
GO:0044409	entry into host	5							1	1																	118
GO:0030260	entry into host cell	6							1	1																	118
GO:0050896	response to stimulus	2	0.00391	17	0.465	11	0.000115	16	0.00745	13	0.00185	13	0.00363	12	0.000119	17	1	8	0.00192	14	2.17e-08	16	5.56e-05	17	0.000251	12	8574
GO:0009719	response to endogenous stimulus	3	1	5	1	1	1	2	0.0749	6	0.0411	6	1	1	1	4	1	2	1	4	0.0148	6	1	5	1	3	1747
GO:0071495	cellular response to endogenous stimulus	4	1	5	1	1	1	1	1	4	0.132	5	1	1	1	2	1	1	1	2	0.00288	6	1	4	1	2	1312
GO:0042221	response to chemical	3	1	9	1	4	1	5	0.322	8	0.151	8	1	4	1	6	1	3	1	7	0.00381	9	0.258	9	1	5	4445
GO:1990267	response to transition metal nanoparticle	4							1	2													1	1			156
GO:0001101	response to acid chemical	4	1	1					1	2	1	1			1	1	1	1	1	1			1	2			332
GO:1901700	response to oxygen-containing compound	4	0.753	6	1	1	1	1	1	4	1	4	1	1	1	4	1	2	1	3	0.171	5	1	5	1	2	1660
GO:1901698	response to nitrogen compound	4	1	3	1	1	1	1	1	2	1	2	1	1	1	2	1	1	1	3	0.426	4	1	1	1	2	1087
GO:0009410	response to xenobiotic stimulus	4							1	1			1	1							1	1			1	1	202
GO:0010035	response to inorganic substance	4	1	2	1	2	1	2	1	2	1	1	1	1	1	1	1	1	1	1	1	1	1	1			519
GO:0010038	response to metal ion	5	1	1	1	2	1	2	1	2			1	1	1	1	1	1	1	1	1	1	1	1			349
GO:0032025	response to cobalt ion	6			1	1	1	1					1	1			1	1									12
GO:0035864	response to potassium ion	6																	1	1							14
GO:0051592	response to calcium ion	6	1	1	1	1	1	1							1	1					1	1					120
GO:0010039	response to iron ion	6							1	1													1	1			36
GO:0010040	response to iron(II) ion	7																					1	1			7
GO:0046688	response to copper ion	6							1	1																	32
GO:0010033	response to organic substance	4	0.594	8	1	3	1	4	0.185	7	0.0939	7	1	3	1	4	1	3	1	5	0.0292	7	0.012	9	1	4	3009
GO:0070848	response to growth factor	5	1	3	1	1	1	2	1	2	1	3	1	1	1	1	1	1	1	1	1	3	1	3	1	1	952
GO:1990089	response to nerve growth factor	6							1	1																	40
GO:0071559	response to transforming growth factor beta	6	1	2			1	1	1	1	1	2									1	2	1	2			249
GO:0071774	response to fibroblast growth factor	6	1	1							1	1			1	1			1	1	1	1			1	1	347
GO:0014070	response to organic cyclic compound	5	1	2	1	1	1	1	0.0348	5	0.393	4	1	1	1	2	1	1	1	2	1	3	1	2	1	1	890
GO:0043331	response to dsRNA	6							1	1									1	1							78
GO:0033993	response to lipid	5	1	2					0.00145	6	1	3			1	2	1	1	1	1	1	3	1	3			873
GO:1904629	response to diterpene	6							0.601	1																	1
GO:0032526	response to retinoic acid	6	1	1					1	1	1	1											1	2			114
GO:0070542	response to fatty acid	6													1	1	1	1	1	1							84
GO:0034097	response to cytokine	5	1	1	1	1	1	1	1	2			1	1	1	1	1	1	1	1	1	1	1	3	1	1	862
GO:0070741	response to interleukin-6	6	1	1			1	1	1	1															1	1	32
GO:0070555	response to interleukin-1	6							1	1					1	1	1	1	1	1			1	1			119
GO:0034612	response to tumor necrosis factor	6			1	1			1	1			1	1									1	1			283
GO:0070670	response to interleukin-4	6																			1	1	1	1			32
GO:0046683	response to organophosphorus	5	1	1							1	1															140
GO:0009725	response to hormone	5	1	3	1	1	1	1	0.0872	5	0.816	4	1	1	1	3	1	2	1	3	0.416	4	1	3	1	2	1080
GO:0034694	response to prostaglandin	6													1	1	1	1	1	1							36
GO:0034696	response to prostaglandin F	7													1	1	1	1	1	1							3
GO:0034698	response to gonadotropin	6																					1	1			30
GO:0032354	response to follicle-stimulating hormone	7																					1	1			12
GO:0048545	response to steroid hormone	6							1	3	1	2			1	1					1	2	1	1			450
GO:0043627	response to estrogen	7							1	2											1	1	1	1			225
GO:0031960	response to corticosteroid	7									1	1									1	1					181
GO:0051384	response to glucocorticoid	8									1	1									1	1					169
GO:1903416	response to glycoside	5							1	1																	6
GO:1904631	response to glucoside	6							1	1																	2
GO:0097305	response to alcohol	5	1	1					1	1	1	1			1	1			1	1	1	2	1	2	1	1	380
GO:0032355	response to estradiol	6																			1	1	1	1			149
GO:0009743	response to carbohydrate	5	1	1					1	1													1	1			227
GO:0034284	response to monosaccharide	6	1	1																			1	1			200
GO:0009746	response to hexose	7	1	1																			1	1			191
GO:0009749	response to glucose	8	1	1																			1	1			186
GO:0010243	response to organonitrogen compound	5	1	3	1	1	1	1	1	2	1	2	1	1	1	2	1	1	1	2	0.308	4	1	1	1	2	998
GO:0071680	response to indole-3-methanol	6													1	1			1	1	1	1			1	1	5
GO:0043279	response to alkaloid	6							1	1																	147
GO:0035094	response to nicotine	7							1	1																	55
GO:1901652	response to peptide	6	1	3	1	1	1	1	1	2	1	2	1	1	1	1	1	1	1	1	1	2	1	1	1	1	652
GO:0043434	response to peptide hormone	7	1	3	1	1	1	1	1	2	1	2	1	1	1	1	1	1	1	1	1	2	1	1	1	1	616
GO:0032868	response to insulin	8	1	2	1	1			1	1	1	1	1	1	1	1	1	1	1	1	1	2	1	1	1	1	463
GO:0014074	response to purine-containing compound	6	1	1							1	1															161
GO:0051591	response to cAMP	7	1	1							1	1															103
GO:0042493	response to drug	4	1	1							1	2			1	1			1	2							449
GO:0009628	response to abiotic stimulus	3	1	2	1	3	1	2	1	3			1	3	1	4	1	1	1	4	0.0409	5	0.00235	7	1	2	1226
GO:0070482	response to oxygen levels	4			1	2	1	1	1	1			1	2							0.199	3	0.883	3			334
GO:0036293	response to decreased oxygen levels	5			1	2	1	1	1	1			1	2							0.169	3	0.752	3			316
GO:0009266	response to temperature stimulus	4	1	1	1	1	1	1	1	1			1	1	1	1			1	1			1	2	1	1	234
GO:0009314	response to radiation	4	1	1					1	1					1	2	1	1	1	2	1	2	1	3			511
GO:0010212	response to ionizing radiation	5	1	1											1	1					1	2	1	2			149
GO:0010332	response to gamma radiation	6																			1	1	0.486	2			53
GO:0009416	response to light stimulus	5	1	1					1	1					1	1	1	1	1	2	1	2	1	2			374
GO:0009411	response to UV	6							1	1					1	1	1	1	1	1	1	1	1	2			133
GO:0010225	response to UV-C	7													1	1	1	1	1	1							14
GO:0009648	photoperiodism	6	1	1																	0.0338	2	1	1			24
GO:0009415	response to water	4							1	1																	18
GO:0043500	muscle adaptation	3					1	1											1	1					1	1	88
GO:0014888	striated muscle adaptation	4					1	1											1	1					1	1	42
GO:0043501	skeletal muscle adaptation	5					1	1											1	1					1	1	26
GO:0006950	response to stress	3	0.973	9	1	6	0.0736	9	1	6	0.0853	8	0.311	7	0.00385	11	1	5	1	7	0.0223	8	0.00243	11	1	5	4101
GO:0035966	response to topologically incorrect protein	4							1	1	1	1															181
GO:0006986	response to unfolded protein	5							1	1	1	1															170
GO:0006952	defense response	4	1	3	1	1	1	2	1	3	1	3	1	1	1	5	1	2	1	1	1	3	1	1	1	2	1867
GO:0006968	cellular defense response	5													1	1	1	1									62
GO:0006954	inflammatory response	5	1	2			1	1	1	1	1	2			1	3					1	1			1	1	656
GO:0002526	acute inflammatory response	6	1	1			1	1																	1	1	145
GO:0009611	response to wounding	4	1	4	1	2	1	1	1	1	1	2	1	3	1	2			1	1	0.413	4	1	4	1	2	1078
GO:0048678	response to axon injury	5	1	2							1	1			1	1			1	1	1	1			1	1	67
GO:0042060	wound healing	5	1	1	1	2					1	2	1	3	1	2			1	1	1	3	1	3	1	1	753
GO:0034405	response to fluid shear stress	4																					1	1			36
GO:0006979	response to oxidative stress	4	1	2	1	1	1	2	1	1	1	1	1	1	1	1			1	1	1	2	1	2	1	1	401
GO:0000302	response to reactive oxygen species	5	1	1							1	1															222
GO:0042542	response to hydrogen peroxide	6	1	1							1	1															128
GO:0006970	response to osmotic stress	4			1	1							1	1									1	1			72
GO:0006972	hyperosmotic response	5			1	1							1	1									1	1			24
GO:0009408	response to heat	4	1	1			1	1	1	1					1	1			1	1					1	1	169
GO:0009409	response to cold	4			1	1							1	1									1	1			49
GO:0001666	response to hypoxia	4			1	2	1	1	1	1			1	2							0.155	3	0.691	3			307
GO:0009414	response to water deprivation	4							1	1																	11
GO:0051606	detection of stimulus	3													1	1			1	1	1	1	1	1	1	1	772
GO:0009582	detection of abiotic stimulus	4													1	1			1	1	1	1	1	1	1	1	201
GO:0050906	detection of stimulus involved in sensory perception	4																					1	1			546
GO:0009607	response to biotic stimulus	3	1	3			1	1	0.864	4	1	3			0.197	5					1	2	1	3			984
GO:0002347	response to tumor cell	4									1	1			1	1											18
GO:0009605	response to external stimulus	3	1	7			1	3	1	5	0.342	6	1	1	0.0451	8	1	1	1	2	0.128	6	1	4	1	3	2565
GO:0071496	cellular response to external stimulus	4	1	2					1	2	1	2	1	1	1	2	1	1			1	1	1	2			285
GO:0043207	response to external biotic stimulus	4	1	3			1	1	0.748	4	1	2			1	4					1	2	1	3			947
GO:0051707	response to other organism	5	1	3			1	1	0.748	4	1	2			1	4					1	2	1	3			947
GO:0009615	response to virus	6	1	2			1	1	1	2	1	1			1	3					1	1	1	2			417
GO:0009617	response to bacterium	6	1	1					1	2	1	1			1	1					1	1	1	1			563
GO:0098542	defense response to other organism	6							1	1	1	1			1	2					1	1	1	1			583
GO:0042742	defense response to bacterium	7									1	1			1	1											257
GO:0050830	defense response to Gram-positive bacterium	8									1	1			1	1											80
GO:0050829	defense response to Gram-negative bacterium	8									1	1			1	1											44
GO:0002237	response to molecule of bacterial origin	5	1	1					1	2	1	1			1	1					1	1	1	1			343
GO:0032496	response to lipopolysaccharide	6	1	1					1	2	1	1			1	1					1	1	1	1			330
GO:0009581	detection of external stimulus	4													1	1			1	1	1	1	1	1	1	1	197
GO:0016048	detection of temperature stimulus	5																					1	1			19
GO:0050961	detection of temperature stimulus involved in sensory perception	6																					1	1			14
GO:0050965	detection of temperature stimulus involved in sensory perception of pain	7																					1	1			14
GO:0042330	taxis	4	1	1							1	3			1	3			1	1	1	1			1	1	870
GO:0006935	chemotaxis	5	1	1							1	3			1	3			1	1	1	1			1	1	870
GO:0050918	positive chemotaxis	6	1	1							0.00146	3			0.00462	3			1	1	1	1			1	1	54
GO:0009991	response to extracellular stimulus	4	1	2			1	1	1	1	1	2	1	1	1	2	1	1			1	2	1	2			552
GO:0031667	response to nutrient levels	5	1	2			1	1	1	1	1	2	1	1	1	2	1	1			1	2	1	2			522
GO:0007584	response to nutrient	6	1	1					1	1	1	1											1	2			205
GO:0033273	response to vitamin	7	1	1					1	1	1	1											1	2			106
GO:0033197	response to vitamin E	8																					1	1			15
GO:0033280	response to vitamin D	8	1	1					1	1	1	1											1	1			39
GO:0042594	response to starvation	6	1	1							1	1	1	1	1	2	1	1			1	1					164
GO:0009612	response to mechanical stimulus	4							1	1					1	1			1	1	1	1	1	1	1	1	221
GO:0035994	response to muscle stretch	5							1	1																	20
GO:0050982	detection of mechanical stimulus	5													1	1			1	1	1	1	1	1	1	1	48
GO:0050974	detection of mechanical stimulus involved in sensory perception	6																					1	1			30
GO:0050966	detection of mechanical stimulus involved in sensory perception of pain	7																					1	1			9
GO:0051179	localization	2	1	5	1	7	1	5	1	4	0.879	8	1	6	0.0941	11	1	4	1	7	0.0309	9	0.346	10	1	5	5739
GO:0051234	establishment of localization	3	1	3	1	5	1	3	1	4	1	5	1	6	1	8	1	2	1	5	0.00616	9	0.4	9	1	5	4711
GO:0006810	transport	4	1	3	1	5	1	3	1	4	1	5	1	6	1	8	1	2	1	5	0.0048	9	0.319	9	1	5	4571
GO:0071705	nitrogen compound transport	5	1	2	1	3	1	2	1	1	1	1	1	1	1	3	1	1	1	1			1	2	1	2	807
GO:0071702	organic substance transport	5	1	2	1	4	1	3	1	3	1	3	1	4	1	5	1	1	1	3	1	5	1	6	1	4	2637
GO:0015931	nucleobase-containing compound transport	6	1	2	0.111	3	1	2	1	1	1	1	1	1	1	2	1	1	1	1			1	2	1	1	194
GO:0050657	nucleic acid transport	7	1	2	0.0637	3	1	2	1	1	1	1	1	1	1	2	1	1	1	1			1	2	1	1	161
GO:0016192	vesicle-mediated transport	5			1	2					1	1	1	2	1	1					1	2	1	2			1400
GO:0006897	endocytosis	6			1	1					1	1	1	1	1	1					1	1	1	1			639
GO:0006907	pinocytosis	7			1	1							1	1							1	1	1	1			17
GO:0098657	import into cell	5																					1	1			44
GO:0051674	localization of cell	3	1	3	1	2					1	4	1	1	1	4	1	1	1	2	0.885	4	1	3	1	2	1320
GO:0033036	macromolecule localization	3	1	2	1	5	1	5	1	3	1	4	1	4	0.625	7	1	2	1	5	1	5	0.467	7	1	4	2805
GO:0008104	protein localization	4			1	2	1	2	1	1	1	3	1	4	1	3			1	2	1	5	1	5	1	3	2445
GO:1902414	protein localization to cell junction	5			1	1							1	1							1	1	1	1			6
GO:1902396	protein localization to bicellular tight junction	6			0.646	1							0.447	1							0.413	1	0.773	1			1
GO:0031503	protein complex localization	5			1	1							1	1									1	1			108
GO:0045184	establishment of protein localization	5			1	2	1	1	1	1	1	2	1	4	1	3			1	2	0.419	5	1	5	1	3	2012
GO:0015031	protein transport	5			1	2	1	1	1	1	1	2	1	4	1	3			1	2	0.293	5	1	5	1	3	1862
GO:0006403	RNA localization	4	1	2	0.00196	4	0.147	3	1	1	1	1	1	1	0.00463	4	1	2	0.112	3			0.183	3	1	1	195
GO:0051236	establishment of RNA localization	5	1	2	0.066	3	1	2	1	1	1	1	1	1	1	2	1	1	1	1			1	2	1	1	163
GO:0050658	RNA transport	6	1	2	0.0637	3	1	2	1	1	1	1	1	1	1	2	1	1	1	1			1	2	1	1	161
GO:0051028	mRNA transport	7	1	2	1	2	1	2	1	1	1	1			1	2	1	1	1	1			1	1	1	1	135
GO:0010876	lipid localization	4							1	1																	343
GO:1902579	multi-organism localization	3			1	1							1	1									1	1			38
GO:0044766	multi-organism transport	4			1	1							1	1									1	1			38
GO:0051641	cellular localization	3	1	3	1	5	1	4	1	3	0.855	6	1	5	0.151	8	1	2	1	4	0.00245	8	0.766	7	1	5	3044
GO:0071166	ribonucleoprotein complex localization	4	1	2	0.014	3	1	2	1	1	1	1	1	1	1	2	1	1	1	1			1	2	1	1	97
GO:0070727	cellular macromolecule localization	4			1	1	1	2	1	1	1	2	1	2	1	1			1	2	1	4	1	3	1	2	1549
GO:0034613	cellular protein localization	5			1	1	1	2	1	1	1	2	1	2	1	1			1	2	1	4	1	3	1	2	1538
GO:0033365	protein localization to organelle	6			1	1	1	2	1	1	1	2	1	2	1	1			1	1	0.194	4	1	3	1	2	884
GO:0034504	protein localization to nucleus	7			1	1							1	1	1	1			1	1	1	2	1	3	1	1	354
GO:1902570	protein localization to nucleolus	8			1	1							1	1									1	1			3
GO:0070585	protein localization to mitochondrion	7					1	1	1	1	1	1	1	1							1	2			1	1	195
GO:0034502	protein localization to chromosome	7					1	1			1	1															58
GO:0071168	protein localization to chromatin	8					1	1			1	1															15
GO:0072594	establishment of protein localization to organelle	7			1	1	1	1	1	1	1	1	1	2	1	1			1	1	0.0654	4	1	3	1	2	667
GO:0072655	establishment of protein localization to mitochondrion	8					1	1	1	1	1	1	1	1							1	2			1	1	190
GO:1990778	protein localization to cell periphery	6													1	1			1	1	1	1			1	1	213
GO:0034629	cellular protein complex localization	6			1	1							1	1									1	1			26
GO:0051640	organelle localization	4			1	2							1	2							1	1	1	2			466
GO:0033750	ribosome localization	5			1	1							1	1									1	1			8
GO:0051648	vesicle localization	5			1	1							1	1							1	1	1	1			240
GO:0051656	establishment of organelle localization	5			1	2							1	2							1	1	1	2			355
GO:0051649	establishment of localization in cell	4	1	3	1	5	1	3	1	3	1	5	1	5	0.0554	8	1	2	1	4	0.000839	8	0.322	7	0.784	5	2640
GO:0033753	establishment of ribosome localization	5			1	1							1	1									1	1			8
GO:0046907	intracellular transport	5	1	3	1	4	1	3	1	3	1	4	1	4	0.517	6	1	2	1	4	0.00144	7	0.397	6	1	4	1905
GO:1902583	multi-organism intracellular transport	6			1	1							1	1									1	1			34
GO:0051169	nuclear transport	6	1	2	1	3	1	2	1	2	1	2	1	2	0.00435	5	1	2	1	3	0.456	3	0.00341	5	1	2	443
GO:0016482	cytoplasmic transport	6	1	3	1	3	1	3	1	3	1	4	1	3	0.0531	6	1	2	1	4	0.00225	6	1	4	0.444	4	1257
GO:0006913	nucleocytoplasmic transport	7	1	2	1	3	1	2	1	2	1	2	1	2	0.00411	5	1	2	1	3	0.441	3	0.0899	4	1	2	438
GO:0051168	nuclear export	8	1	2	0.0591	3	1	2	1	1	1	1	1	1	1	2	1	1	1	1			1	2	1	1	157
GO:0006405	RNA export from nucleus	9	1	2	0.0136	3	1	2	1	1	1	1	1	1	1	2	1	1	1	1			1	2	1	1	96
GO:0051170	nuclear import	8			1	1			1	1			1	1	1	2			1	1	1	2	0.534	3	1	1	281
GO:0006886	intracellular protein transport	6			1	1	1	1	1	1	1	1	1	2	1	1			1	2	0.337	4	1	3	1	2	1022
GO:0051650	establishment of vesicle localization	5			1	1							1	1							1	1	1	1			228
GO:0002376	immune system process	2	1	5	1	4	1	3	1	4	1	3	1	3	1	5	1	1	1	2	1	3	1	4	1	2	2673
GO:0002252	immune effector process	3	1	2	1	1	1	2	1	1	1	1			1	3					1	1	1	1	1	1	796
GO:0002443	leukocyte mediated immunity	4	1	1	1	1	1	1			1	1			1	2											311
GO:0002449	lymphocyte mediated immunity	5	1	1	1	1	1	1			1	1			1	2											240
GO:0051607	defense response to virus	4							1	1					1	1					1	1	1	1			333
GO:0002440	production of molecular mediator of immune response	3	1	1	1	1	1	1							1	1											159
GO:0002377	immunoglobulin production	4	1	1	1	1	1	1							1	1											92
GO:0006955	immune response	3	1	3	1	2	1	3	1	3	1	3	1	1	1	5	1	1	1	1	1	2	1	2	1	2	1728
GO:0006959	humoral immune response	4	1	1			1	1																	1	1	203
GO:0002250	adaptive immune response	4	1	1	1	1	1	1			1	1			1	2											369
GO:0002460	adaptive immune response based on somatic recombination of immune receptors built from immunoglobulin superfamily domains	5	1	1	1	1	1	1			1	1			1	2											240
GO:0042088	T-helper 1 type immune response	6									1	1			1	1											36
GO:0002456	T cell mediated immunity	6									1	1			1	1											79
GO:0019724	B cell mediated immunity	6	1	1	1	1	1	1							1	1											129
GO:0016064	immunoglobulin mediated immune response	7	1	1	1	1	1	1							1	1											126
GO:0002381	immunoglobulin production involved in immunoglobulin mediated immune response	8	1	1	1	1	1	1							1	1											46
GO:0045087	innate immune response	4	1	1	1	1	1	1	1	3	1	3	1	1	1	4	1	1	1	1	1	2	1	1	1	1	1140
GO:0034341	response to interferon-gamma	5							1	1											1	1	1	1			157
GO:0002418	immune response to tumor cell	4									1	1			1	1											15
GO:0002424	T cell mediated immune response to tumor cell	5									1	1			1	1											3
GO:0002437	inflammatory response to antigenic stimulus	4									0.255	2			0.577	2											54
GO:0032502	developmental process	2	2.05e-07	19	0.000199	13	0.00534	12	6.14e-07	15	0.18	9	4.13e-06	13	4.13e-07	17	6.27e-05	12	0.015	11	0.000376	11	0.000224	14	1	6	5934
GO:0031128	developmental induction	3	1	1							1	1			1	1			1	1	1	1			1	1	35
GO:0048856	anatomical structure development	3	0.000217	15	0.00052	12	0.0847	10	0.000285	12	1	7	0.0267	9	9.31e-05	14	0.00275	10	0.0374	10	0.00145	10	5.05e-05	14	1	5	5272
GO:1904888	cranial skeletal system development	4							1	1																	55
GO:0060021	palate development	4							1	1																	85
GO:0009888	tissue development	4	1	6	1	3	1	4	0.000453	8	1	3	1	3	1	4	1	4	1	3	0.018	6	0.0296	7	1	2	1807
GO:0007498	mesoderm development	5																					1	1			128
GO:0061448	connective tissue development	5	1	1							1	1			1	1			1	1	1	2			1	1	245
GO:0060429	epithelium development	5	1	3	1	2	1	1	1	4	1	1	1	1	1	2	1	2	1	1	0.485	4	1	3	1	1	1125
GO:0003158	endothelium development	6			1	1							1	1			1	1					1	1			115
GO:0008544	epidermis development	6	1	1					1	1													1	1			318
GO:0060537	muscle tissue development	5	0.118	4	1	2	0.032	4	0.000437	5	0.429	3	1	2	1	3	1	2	0.692	3	1	2	0.0429	4	1	2	362
GO:0014706	striated muscle tissue development	6	0.101	4	1	2	0.0274	4	0.00036	5	0.383	3	1	2	1	3	1	2	0.617	3	1	2	0.0368	4	1	2	348
GO:0098727	maintenance of cell number	3	0.00612	4	1	2	0.0978	3	0.064	3	1	2	1	2	1	1	1	1	0.0748	3	1	1	1	2	1	1	170
GO:0009653	anatomical structure morphogenesis	3	1	5	1	4	1	4	0.119	7	1	4	1	3	1	6	1	2	1	4	1	5	1	5	1	3	2805
GO:0048646	anatomical structure formation involved in morphogenesis	3	1	4	1	2	1	2	0.134	5	1	2	1	1	1	3			1	2	1	3	1	2	1	2	1184
GO:0044699	single-organism process	2	4.47e-05	24	3.89e-05	19	0.00228	18	4.6e-08	21	0.0013	16	8.72e-06	17	1.01e-05	22	0.000129	16	0.00288	17	3.18e-05	16	2.05e-08	24	0.00505	13	13769
GO:0016265	death	3	0.308	7	1	5	1	3	0.00108	8	0.094	6	0.00333	7	0.00814	8	1	4	1	4	0.433	5	1.85e-06	11	1	3	2026
GO:0044707	single-multicellular organism process	3	3.84e-06	18	0.00286	12	0.00812	12	6.78e-08	16	1	8	9.79e-05	12	8.36e-06	16	9.79e-05	12	0.146	10	0.000565	11	4.12e-05	15	1	6	6175
GO:0042303	molting cycle	4	1	1					1	1																	109
GO:0042633	hair cycle	5	1	1					1	1																	109
GO:0090130	tissue migration	4	1	1							1	2			1	2			1	1	1	1			1	1	228
GO:0090132	epithelium migration	5	1	1							1	2			1	2			1	1	1	1			1	1	223
GO:0022404	molting cycle process	4	1	1					1	1																	88
GO:0022405	hair cycle process	5	1	1					1	1																	88
GO:0048771	tissue remodeling	4									1	1			1	1					1	1	1	1			153
GO:0050817	coagulation	4			1	2							1	2							1	2	1	2			579
GO:0001503	ossification	4	0.137	4			1	2	1	2	1	2	1	2	0.061	4	0.339	3	1	2	1	2			1	2	376
GO:0001816	cytokine production	4							1	3	1	2			1	3					1	1	1	2			647
GO:0032612	interleukin-1 production	5									1	1			0.915	2					1	1	1	1			68
GO:0032611	interleukin-1 beta production	6									1	1			0.666	2					1	1	1	1			58
GO:0071706	tumor necrosis factor superfamily cytokine production	5									1	1			1	1											107
GO:0032640	tumor necrosis factor production	6									1	1			1	1											102
GO:0032615	interleukin-12 production	5							1	1	1	1			1	1											55
GO:0032635	interleukin-6 production	5									1	1			1	1											110
GO:0032609	interferon-gamma production	5									1	1			1	1											105
GO:0032623	interleukin-2 production	5																					1	1			60
GO:0032613	interleukin-10 production	5									1	1			1	1											44
GO:0032606	type I interferon production	5							0.0268	3	1	2			0.0607	3											127
GO:0032608	interferon-beta production	6									0.201	2			0.456	2											48
GO:0032607	interferon-alpha production	6									1	1			1	1											21
GO:0007586	digestion	4																					1	1			172
GO:0022600	digestive system process	5																					1	1			96
GO:0043133	hindgut contraction	6																					1	1			3
GO:0002021	response to dietary excess	4																			1	1					23
GO:1902578	single-organism localization	3	1	3	1	5	1	3	1	3	1	4	1	4	1	6	1	1	1	3	0.0257	8	0.96	8	1	5	4182
GO:1902580	single-organism cellular localization	4			1	2	1	1	1	1	1	1	1	3	1	1			1	1	0.051	5	1	4	1	2	1284
GO:0044765	single-organism transport	4	1	3	1	5	1	3	1	3	1	4	1	4	1	6	1	1	1	3	0.0187	8	0.715	8	1	5	4002
GO:0006818	hydrogen transport	5			1	1							1	1							1	1	1	1			159
GO:0015850	organic hydroxy compound transport	5							1	1																	236
GO:1902582	single-organism intracellular transport	5	1	3	1	4	1	3	1	2	1	3	1	3	1	4	1	1	1	3	0.0146	6	0.245	6	1	4	1742
GO:1902593	single-organism nuclear import	6			1	1							1	1	1	1			1	1	1	2	0.512	3	1	1	277
GO:0071426	ribonucleoprotein complex export from nucleus	6	1	2	0.0127	3	1	2	1	1	1	1	1	1	1	2	1	1	1	1			1	2	1	1	94
GO:0071427	mRNA-containing ribonucleoprotein complex export from nucleus	7	1	2	0.833	2	1	2	1	1	1	1			1	2	1	1	1	1			1	1	1	1	82
GO:0071428	rRNA-containing ribonucleoprotein complex export from nucleus	7			1	1							1	1									1	1			11
GO:0006839	mitochondrial transport	6					1	1	1	1	1	1	1	1							1	2			1	1	283
GO:0030705	cytoskeleton-dependent intracellular transport	6			1	1							1	1							1	1	1	1			126
GO:0099515	actin filament-based transport	7			1	1							1	1							1	1	1	1			6
GO:0099518	vesicle cytoskeletal trafficking	7			1	1							1	1							1	1	1	1			41
GO:0032066	nucleolus to nucleoplasm transport	6																					1	1			3
GO:0006605	protein targeting	6			1	1	1	1	1	1	1	1	1	2	1	1			1	1	0.0815	4	1	3	1	2	706
GO:0044744	protein targeting to nucleus	7			1	1							1	1	1	1			1	1	1	2	0.512	3	1	1	277
GO:0006611	protein export from nucleus	6			1	1							1	1									1	1			56
GO:0006811	ion transport	5	1	1	1	1					1	1	1	1	1	1			1	1	1	3	1	3	1	1	1549
GO:0099587	inorganic ion import into cell	6																					1	1			13
GO:0006812	cation transport	6	1	1	1	1					1	1	1	1	1	1			1	1	1	3	1	3	1	1	1052
GO:0072511	divalent inorganic cation transport	7	1	1							1	1			1	1			1	1	1	2	1	2	1	1	430
GO:0098659	inorganic cation import into cell	7																					1	1			13
GO:0030001	metal ion transport	7	1	1	1	1					1	1	1	1	1	1			1	1	1	3	1	3	1	1	813
GO:0070838	divalent metal ion transport	8	1	1							1	1			1	1			1	1	1	2	1	2	1	1	427
GO:0006816	calcium ion transport	9	1	1							1	1			1	1			1	1	1	2	1	2	1	1	380
GO:0060401	cytosolic calcium ion transport	10	1	1							1	1			1	1			1	1	0.946	2	1	1	1	1	126
GO:0070509	calcium ion import	10	1	1							1	1			1	1			1	1	1	1	1	1	1	1	151
GO:1990035	calcium ion import into cell	11																					1	1			4
GO:0015672	monovalent inorganic cation transport	7			1	1							1	1							1	1	1	1			584
GO:0015992	proton transport	8			1	1							1	1							1	1	1	1			157
GO:0006814	sodium ion transport	8			1	1							1	1							1	1	1	1			206
GO:0046903	secretion	5			1	2					1	1	1	2	1	2					0.44	4	1	3	1	1	1096
GO:0032941	secretion by tissue	6																			1	1					90
GO:0042886	amide transport	5													1	1									1	1	368
GO:0015833	peptide transport	6													1	1									1	1	344
GO:0002790	peptide secretion	7													1	1									1	1	281
GO:0006909	phagocytosis	5									1	1			1	1											240
GO:0043277	apoptotic cell clearance	6									1	1			1	1											34
GO:0006869	lipid transport	5							1	1																	309
GO:0015918	sterol transport	6							1	1																	72
GO:0030301	cholesterol transport	7							1	1																	70
GO:0017038	protein import	5			1	1							1	1	1	1			1	1	1	2	0.823	3	1	1	326
GO:0006606	protein import into nucleus	6			1	1							1	1	1	1			1	1	1	2	0.512	3	1	1	277
GO:0042991	transcription factor import into nucleus	7																					1	1			100
GO:0000060	protein import into nucleus, translocation	7			1	1							1	1									1	1			51
GO:0044767	single-organism developmental process	3	1.6e-07	19	0.000168	13	0.00459	12	5.01e-07	15	0.161	9	3.46e-06	13	3.29e-07	17	5.33e-05	12	0.0131	11	0.000324	11	0.000187	14	1	6	5849
GO:0021700	developmental maturation	4			1	1															1	1					245
GO:0031099	regeneration	4											1	1									1	1			184
GO:0007568	aging	4	1	3							1	2			1	2			1	2	1	2	1	1	1	1	301
GO:0061061	muscle structure development	4	0.0487	5	0.154	4	0.00977	5	0.00495	5	1	3	1	3	0.018	5	0.0531	4	1	3	1	2	0.0141	5	1	2	594
GO:0048857	neural nucleus development	4	1	1							1	1			0.0106	3	0.344	2	1	1	1	1			1	1	71
GO:0060322	head development	4	1	3					1	2	1	1			1	3	1	2	1	1	1	2			1	1	762
GO:0048589	developmental growth	4	1	1	1	1			1	1	1	1	1	2	1	2	1	1	1	1	1	2	0.323	4	1	1	611
GO:0060560	developmental growth involved in morphogenesis	5																					1	1			219
GO:0003401	axis elongation	6																					1	1			34
GO:0035265	organ growth	5	1	1	1	1			1	1	1	1	1	1	1	2	1	1	1	1	1	1	1	2	1	1	146
GO:0035264	multicellular organism growth	5																			1	1	1	1			164
GO:0042246	tissue regeneration	5											1	1									1	1			60
GO:0043403	skeletal muscle tissue regeneration	6											1	1									1	1			33
GO:0061383	trabecula morphogenesis	4											1	1									1	1			39
GO:0061384	heart trabecula morphogenesis	5											1	1									1	1			24
GO:0007275	multicellular organismal development	4	0.000909	14	0.177	9	0.36	9	0.000173	12	1	7	1	7	5.24e-05	14	0.0185	9	1	8	0.0987	8	0.00238	12	1	5	5038
GO:0048731	system development	5	0.00167	13	1	7	0.147	9	0.000555	11	1	7	1	5	0.000123	13	0.538	7	0.484	8	0.0426	8	0.0428	10	1	5	4482
GO:0061008	hepaticobiliary system development	6	1	1																							151
GO:0007399	nervous system development	6	0.132	8	1	2	1	3	0.00404	8	0.248	6	1	1	1	6	1	4	1	2	1	2	1	4	1	2	2418
GO:0055123	digestive system development	6			1	1	1	1																			160
GO:0001655	urogenital system development	6	1	1					1	1	1	1			1	2	1	1	1	1	1	2	1	1	1	1	334
GO:0035270	endocrine system development	6	1	1							1	1			1	1			1	1	1	1			1	1	153
GO:0001501	skeletal system development	6	1	2					1	2	1	1			1	1			1	1	1	1			1	1	507
GO:0048513	animal organ development	6	0.156	9	1	4	1	5	0.0324	8	1	5	1	4	0.0034	10	1	5	1	6	0.00367	8	0.0203	9	1	3	3212
GO:0043588	skin development	7	1	1					1	1					1	1			1	1	1	1	1	1	1	1	255
GO:0098773	skin epidermis development	8	1	1					1	1																	90
GO:0007517	muscle organ development	7	0.123	4	1	2	0.0334	4	0.0193	4	0.443	3	1	2	0.055	4	0.313	3	0.715	3	1	2	0.0448	4	1	2	366
GO:0060538	skeletal muscle organ development	8	0.329	3	1	2	0.00212	4	0.00122	4	1	2	1	2	0.177	3	0.0397	3	1	2	1	1	0.149	3	1	1	182
GO:0007519	skeletal muscle tissue development	9	0.269	3	1	2	0.00162	4	0.000927	4	1	2	1	2	1	2	1	2	1	2	1	1	0.122	3	1	1	170
GO:0048630	skeletal muscle tissue growth	10											1	1									1	1			10
GO:0060485	mesenchyme development	7					1	1			1	1			1	1	1	1					1	1			248
GO:0048368	lateral mesoderm development	8																					1	1			15
GO:0048339	paraxial mesoderm development	8																					1	1			21
GO:0031214	biomineral tissue development	7							1	1																	136
GO:0030282	bone mineralization	8							1	1																	103
GO:0060612	adipose tissue development	7																			1	1					36
GO:0060613	fat pad development	8																			1	1					8
GO:0051216	cartilage development	7	1	1							1	1			1	1			1	1	1	1			1	1	189
GO:0060541	respiratory system development	6	1	2					1	1	1	1			1	2	1	1	1	1	1	2	1	1	1	1	228
GO:0060539	diaphragm development	7													1	1	1	1									12
GO:0061458	reproductive system development	6	1	1	1	1			1	1	1	1	1	1	1	2	1	1			1	1	1	1			461
GO:0072359	circulatory system development	6	1	3	1	1	1	3	0.0569	5	1	2	1	1	0.2	5	1	2	1	3	0.295	4	1	4	1	3	987
GO:0002520	immune system development	6	1	3	1	3	1	1	1	2	1	2	1	2	1	4			1	1	1	2	1	3			843
GO:0002200	somatic diversification of immune receptors	7	1	1	1	1	1	1			0.37	2			0.00811	3											65
GO:0016445	somatic diversification of immunoglobulins	8	1	1	1	1	1	1							1	1											54
GO:0002208	somatic diversification of immunoglobulins involved in immune response	9	1	1	1	1	1	1							1	1											39
GO:0048534	hematopoietic or lymphoid organ development	7	1	2	1	2			1	2	1	2	1	2	1	3			1	1	1	2	1	3			795
GO:0030097	hemopoiesis	8	1	2	1	2			1	2	1	2	1	2	1	3			1	1	1	2	1	3			749
GO:0060216	definitive hemopoiesis	9	1	1															1	1							24
GO:0048536	spleen development	8																	1	1							43
GO:0002507	tolerance induction	7									1	1			1	1											29
GO:0072358	cardiovascular system development	6	1	3	1	1	1	3	0.0569	5	1	2	1	1	0.2	5	1	2	1	3	0.295	4	1	4	1	3	987
GO:0072001	renal system development	6	1	1					1	1	1	1			1	2	1	1	1	1	1	1	1	1	1	1	291
GO:0007422	peripheral nervous system development	6							1	1																	76
GO:0007417	central nervous system development	6	1	3			1	1	1	3	1	1			1	3	1	2	1	1	1	2			1	1	951
GO:0021510	spinal cord development	7					1	1																			112
GO:0048483	autonomic nervous system development	6							1	1																	44
GO:0048486	parasympathetic nervous system development	6							1	1																	19
GO:0021783	preganglionic parasympathetic fiber development	7							1	1																	17
GO:0001944	vasculature development	6	1	2	1	1	1	2	1	2	1	2			1	3			1	2	1	2	1	2	1	2	630
GO:0048736	appendage development	5							1	1																	178
GO:0035107	appendage morphogenesis	6							1	1																	157
GO:0060173	limb development	6							1	1																	178
GO:0035108	limb morphogenesis	7							1	1																	157
GO:0035136	forelimb morphogenesis	8							1	1																	42
GO:0035295	tube development	5	1	3	1	1	1	1	1	2	1	1			1	2	1	1	1	1	1	3	1	2	1	1	635
GO:0061326	renal tubule development	6	1	1							1	1			1	1			1	1	1	1	1	1	1	1	97
GO:0010171	body morphogenesis	4	0.928	2					0.335	2					1	1											55
GO:0048532	anatomical structure arrangement	4							1	1																	22
GO:0007389	pattern specification process	4	1	2					1	2	1	1			1	3	1	2	1	3	1	1			1	1	467
GO:0009798	axis specification	5	1	1					1	1					1	1	1	1									96
GO:0003002	regionalization	5	1	2					1	2	1	1			1	3	1	2	0.628	3	1	1			1	1	350
GO:0009952	anterior/posterior pattern specification	6	1	1					1	2					1	2	1	2	1	2							212
GO:0009948	anterior/posterior axis specification	7	1	1					1	1					1	1	1	1									51
GO:0035282	segmentation	6							1	1					1	1	1	1									100
GO:0019827	stem cell population maintenance	4	0.0057	4	1	2	0.0928	3	0.0607	3	1	2	1	2	1	1	1	1	0.071	3	1	1	1	2	1	1	167
GO:0035019	somatic stem cell population maintenance	5	1	2			1	1	1	1	0.532	2			1	1			1	1	1	1	1	1	1	1	78
GO:0097150	neuronal stem cell population maintenance	5																	1	1							21
GO:0048729	tissue morphogenesis	4	1	2					1	2	1	1			1	1			1	1	1	2	1	2	1	1	632
GO:0002009	morphogenesis of an epithelium	5	1	2					1	2	1	1			1	1			1	1	1	2	1	2	1	1	490
GO:0060571	morphogenesis of an epithelial fold	6	1	1					1	1																	28
GO:0009791	post-embryonic development	4	1	1			1	1	1	1									1	2	1	1			1	1	115
GO:0001763	morphogenesis of a branching structure	4	1	1							1	1			1	1			1	1	1	2	1	2	1	1	217
GO:0061138	morphogenesis of a branching epithelium	5	1	1							1	1			1	1			1	1	1	2	1	2	1	1	202
GO:0060602	branch elongation of an epithelium	6																					1	1			22
GO:0009790	embryo development	4	0.0559	6	1	2	1	1	0.000165	7	1	1	1	2	1	4	1	3	1	3	1	2	1	3	1	1	1030
GO:0009792	embryo development ending in birth or egg hatching	5	1	4	1	2	1	1	0.00733	5	1	1	1	2	1	2	1	2	1	2	1	2	1	2	1	1	644
GO:0043009	chordate embryonic development	6	1	3	1	2	1	1	0.0069	5			1	2	1	1	1	2	1	1	1	1	1	2			636
GO:0001701	in utero embryonic development	7	1	3	1	2	1	1	0.668	3			1	2	1	1	1	2	1	1	1	1	1	2			377
GO:0048706	embryonic skeletal system development	7	1	1					1	1																	130
GO:0009880	embryonic pattern specification	5													1	1	1	1									65
GO:0007350	blastoderm segmentation	6													1	1	1	1									18
GO:0007351	tripartite regional subdivision	7													1	1	1	1									14
GO:0000578	embryonic axis specification	6													1	1	1	1									37
GO:0008595	anterior/posterior axis specification, embryo	7													1	1	1	1									14
GO:0007354	zygotic determination of anterior/posterior axis, embryo	8													1	1	1	1									4
GO:0007356	thorax and anterior abdomen determination	9													1	1	0.893	1									2
GO:0061053	somite development	5							1	1																	87
GO:0001756	somitogenesis	6							1	1																	71
GO:0035239	tube morphogenesis	4	1	2					1	1	1	1			1	1			1	1	1	2	1	2	1	1	384
GO:0060562	epithelial tube morphogenesis	5	1	2					1	1	1	1			1	1			1	1	1	2	1	2	1	1	342
GO:0061333	renal tubule morphogenesis	6	1	1							1	1			1	1			1	1	1	1			1	1	79
GO:0048754	branching morphogenesis of an epithelial tube	5	1	1							1	1			1	1			1	1	1	2	1	2	1	1	167
GO:0048732	gland development	4	1	2							1	1			1	1			1	1	0.017	4	1	1	1	1	472
GO:0030879	mammary gland development	5	1	1							1	1			1	1			1	1	0.0178	3	1	1	1	1	148
GO:0061180	mammary gland epithelium development	6	1	1							1	1			1	1			1	1	0.355	2	1	1	1	1	77
GO:0001889	liver development	5	1	1																							148
GO:0007423	sensory organ development	4	0.565	4			1	1	1	1	1	1			1	2	1	1	1	2	1	1	1	1	1	1	545
GO:0001654	eye development	5	0.116	4			1	1	1	1	1	1			1	2	1	1	1	2	1	1	1	1	1	1	360
GO:0043010	camera-type eye development	6	1	3			1	1	1	1					1	1	1	1	1	1			1	1			314
GO:0060041	retina development in camera-type eye	7	1	2			1	1	1	1													1	1			151
GO:0043583	ear development	5							1	1																	218
GO:0021675	nerve development	4							1	1																	72
GO:0021545	cranial nerve development	5							1	1																	44
GO:0021559	trigeminal nerve development	6							1	1																	9
GO:0021557	oculomotor nerve development	6							1	1																	4
GO:0048598	embryonic morphogenesis	4	0.0544	5					0.139	4	1	1			1	2			1	1	1	1	1	1	1	1	608
GO:0035113	embryonic appendage morphogenesis	5							1	1																	134
GO:0030326	embryonic limb morphogenesis	6							1	1																	134
GO:0035115	embryonic forelimb morphogenesis	7							1	1																	34
GO:0007369	gastrulation	5	1	1					1	1																	182
GO:0001702	gastrulation with mouth forming second	6	1	1					1	1																	30
GO:0010172	embryonic body morphogenesis	5	0.0495	2					0.0178	2					1	1											13
GO:0016331	morphogenesis of embryonic epithelium	5	1	1					1	2																	160
GO:0060348	bone development	4							1	2																	181
GO:0048568	embryonic organ development	4	1	1					1	1									1	1			1	1			449
GO:0030903	notochord development	5																					1	1			21
GO:0031076	embryonic camera-type eye development	5	1	1					1	1																	37
GO:0035162	embryonic hemopoiesis	5																	1	1							25
GO:0048565	digestive tract development	4			1	1	1	1																			146
GO:0030323	respiratory tube development	4	1	2					1	1	1	1			1	1			1	1	1	2	1	1	1	1	200
GO:0009887	organ morphogenesis	4	1	2					1	2	1	1	1	1	1	3	1	2	1	2	1	3	1	3	1	1	965
GO:0090596	sensory organ morphogenesis	5	1	2					1	1	1	1			1	2	1	1	1	2	1	1			1	1	272
GO:0048592	eye morphogenesis	6	1	2					1	1	1	1			1	2	1	1	1	2	1	1			1	1	157
GO:0048593	camera-type eye morphogenesis	7	1	1					1	1					1	1	1	1	1	1							117
GO:0060042	retina morphogenesis in camera-type eye	8							1	1																	56
GO:0042476	odontogenesis	5							1	1																	124
GO:0022612	gland morphogenesis	5																			1	1	1	1			135
GO:0060443	mammary gland morphogenesis	6																			1	1	1	1			55
GO:0060056	mammary gland involution	7																			1	1	1	1			10
GO:0060603	mammary gland duct morphogenesis	7																			1	1	1	1			40
GO:0060444	branching involved in mammary gland duct morphogenesis	8																			1	1	1	1			27
GO:0048705	skeletal system morphogenesis	5							1	1																	218
GO:0048562	embryonic organ morphogenesis	5	1	1					1	1													1	1			305
GO:0042471	ear morphogenesis	6							1	1																	126
GO:0048048	embryonic eye morphogenesis	6	1	1					1	1																	36
GO:0048596	embryonic camera-type eye morphogenesis	7	1	1					1	1																	27
GO:0003404	optic vesicle morphogenesis	8							1	1																	2
GO:0048704	embryonic skeletal system morphogenesis	6							1	1																	97
GO:0048701	embryonic cranial skeleton morphogenesis	7							1	1																	46
GO:0060349	bone morphogenesis	5							1	1																	88
GO:0001568	blood vessel development	4	1	2	1	1	1	2	1	2	1	2			1	3			1	2	1	2	1	2	1	2	607
GO:0001824	blastocyst development	4	1	1																							77
GO:0035148	tube formation	4	1	1					1	1																	147
GO:0060606	tube closure	5	1	1					1	1																	95
GO:0072175	epithelial tube formation	5	1	1					1	1																	132
GO:0001838	embryonic epithelial tube formation	6	1	1					1	1																	131
GO:0007507	heart development	4	1	1					1	2	1	1	1	1	1	3	1	2	1	1	1	2	1	3	1	1	538
GO:0060976	coronary vasculature development	5	1	1							1	1			1	1			1	1	1	1			1	1	44
GO:0003007	heart morphogenesis	5											1	1							1	1	1	2			229
GO:0060419	heart growth	5	1	1					1	1	1	1			0.888	2	1	1	1	1	1	1			1	1	67
GO:0048738	cardiac muscle tissue development	5	1	1					1	1	1	1			1	2	1	1	1	1	1	1	1	1	1	1	182
GO:0055017	cardiac muscle tissue growth	6	1	1					1	1	1	1			1	1			1	1	1	1			1	1	59
GO:0035050	embryonic heart tube development	5																					1	1			80
GO:0003143	embryonic heart tube morphogenesis	6																					1	1			67
GO:0001822	kidney development	4	1	1					1	1	1	1			1	2	1	1	1	1	1	1	1	1	1	1	274
GO:0072074	kidney mesenchyme development	5													1	1	1	1									18
GO:0001823	mesonephros development	5	1	1							1	1			1	2	1	1	1	1	1	1			1	1	105
GO:0001656	metanephros development	5													1	1	1	1					1	1			93
GO:0072075	metanephric mesenchyme development	6													1	1	1	1									15
GO:0072073	kidney epithelium development	5	1	1							1	1			1	2	1	1	1	1	1	1	1	1	1	1	142
GO:0072163	mesonephric epithelium development	6	1	1							1	1			1	2	1	1	1	1	1	1			1	1	101
GO:0072164	mesonephric tubule development	7	1	1							1	1			1	2	1	1	1	1	1	1			1	1	101
GO:0001657	ureteric bud development	8	1	1							1	1			1	2	1	1	1	1	1	1			1	1	100
GO:0072207	metanephric epithelium development	6																					1	1			28
GO:0072170	metanephric tubule development	7																					1	1			24
GO:0060993	kidney morphogenesis	5	1	1							1	1			1	2	1	1	1	1	1	1			1	1	94
GO:0003338	metanephros morphogenesis	6													1	1	1	1									33
GO:0048839	inner ear development	4							1	1																	193
GO:0042472	inner ear morphogenesis	5							1	1																	106
GO:0048645	organ formation	4	1	1							1	1			1	1			1	1	1	1			1	1	67
GO:0010092	specification of organ identity	5	1	1							1	1			1	1			1	1	1	1			1	1	35
GO:0021602	cranial nerve morphogenesis	4							1	1																	24
GO:0021622	oculomotor nerve morphogenesis	5							1	1																	2
GO:0021603	cranial nerve formation	5							1	1																	5
GO:0021623	oculomotor nerve formation	6							1	1																	2
GO:0030324	lung development	4	1	2					1	1	1	1			1	1			1	1	1	2	1	1	1	1	196
GO:0060425	lung morphogenesis	5																					1	1			58
GO:0060441	epithelial tube branching involved in lung morphogenesis	6																					1	1			31
GO:0060449	bud elongation involved in lung branching	7																					1	1			7
GO:0060428	lung epithelium development	5																			1	1	1	1			46
GO:0003205	cardiac chamber development	4											1	1									1	1			151
GO:0003231	cardiac ventricle development	5											1	1									1	1			111
GO:0061029	eyelid development in camera-type eye	4							1	1																	13
GO:0072006	nephron development	4	1	1							1	1			1	2	1	1	1	1	1	1	1	1	1	1	133
GO:0072009	nephron epithelium development	5	1	1							1	1			1	2	1	1	1	1	1	1	1	1	1	1	109
GO:0072243	metanephric nephron epithelium development	6																					1	1			24
GO:0072080	nephron tubule development	6	1	1							1	1			1	1			1	1	1	1	1	1	1	1	94
GO:0072234	metanephric nephron tubule development	7																					1	1			21
GO:0007420	brain development	4	1	3					1	2	1	1			1	3	1	2	1	1	1	2			1	1	719
GO:0030900	forebrain development	4	1	2					1	1	1	1			1	1			1	1	1	2			1	1	392
GO:0021537	telencephalon development	5																			1	1					250
GO:0032835	glomerulus development	4													1	1	1	1									58
GO:0072010	glomerular epithelium development	5													1	1	1	1									20
GO:0030901	midbrain development	4	1	1							1	1			0.0209	3	0.54	2	1	1	1	1			1	1	89
GO:0021762	substantia nigra development	5	1	1							1	1			0.00323	3	0.157	2	1	1	1	1			1	1	48
GO:0048514	blood vessel morphogenesis	4	1	1	1	1	1	2	1	1	1	2			1	3			1	2	1	2	1	2	1	2	511
GO:0060977	coronary vasculature morphogenesis	5	1	1							1	1			1	1			1	1	1	1			1	1	11
GO:0030902	hindbrain development	4	1	2					1	1	1	1			1	1			1	1	1	1			1	1	159
GO:0003407	neural retina development	4	1	1			1	1	1	1													1	1			59
GO:0022037	metencephalon development	4	1	1					1	1																	115
GO:0001825	blastocyst formation	4	1	1																							36
GO:0021536	diencephalon development	4	1	1							1	1			1	1			1	1	1	1			1	1	83
GO:0021983	pituitary gland development	5	1	1							1	1			1	1			1	1	1	1			1	1	45
GO:0034505	tooth mineralization	4							1	1																	22
GO:0001525	angiogenesis	4	1	1	1	1	1	2	1	1	1	2			1	3			1	2	1	2	1	1	1	2	430
GO:0002040	sprouting angiogenesis	5	1	1							0.359	2			0.81	2			1	1	1	1			1	1	64
GO:0060978	angiogenesis involved in coronary vascular morphogenesis	5	1	1							1	1			1	1			1	1	1	1			1	1	3
GO:0021915	neural tube development	4	1	1					1	1																	168
GO:0001841	neural tube formation	5	1	1					1	1																	111
GO:0014020	primary neural tube formation	6	1	1					1	1																	99
GO:0001842	neural fold formation	7	1	1					1	1																	7
GO:0001843	neural tube closure	7	1	1					1	1																	94
GO:0021995	neuropore closure	8	1	1					0.601	1																	1
GO:0021506	anterior neuropore closure	9	1	1					0.601	1																	1
GO:0021549	cerebellum development	4	1	1					1	1																	103
GO:0021575	hindbrain morphogenesis	4	1	1					1	1																	47
GO:0021695	cerebellar cortex development	4	1	1					1	1																	54
GO:0072028	nephron morphogenesis	4	1	1							1	1			1	1			1	1	1	1			1	1	79
GO:0072088	nephron epithelium morphogenesis	5	1	1							1	1			1	1			1	1	1	1			1	1	77
GO:0072078	nephron tubule morphogenesis	6	1	1							1	1			1	1			1	1	1	1			1	1	75
GO:0072171	mesonephric tubule morphogenesis	7	1	1							1	1			1	1			1	1	1	1			1	1	67
GO:0060675	ureteric bud morphogenesis	8	1	1							1	1			1	1			1	1	1	1			1	1	66
GO:0001658	branching involved in ureteric bud morphogenesis	9	1	1							1	1			1	1			1	1	1	1			1	1	61
GO:0021680	cerebellar Purkinje cell layer development	4	1	1					1	1																	30
GO:0001942	hair follicle development	4	1	1					1	1																	88
GO:0021984	adenohypophysis development	4	1	1							1	1			1	1			1	1	1	1			1	1	15
GO:0021587	cerebellum morphogenesis	4	1	1					1	1																	43
GO:0021696	cerebellar cortex morphogenesis	4	1	1					1	1																	36
GO:0021697	cerebellar cortex formation	4	1	1					1	1																	26
GO:0021692	cerebellar Purkinje cell layer morphogenesis	4	1	1					1	1																	17
GO:0010842	retina layer formation	4							1	1																	23
GO:0021694	cerebellar Purkinje cell layer formation	4	1	1					1	1																	14
GO:0060900	embryonic camera-type eye formation	4							1	1																	12
GO:0002072	optic cup morphogenesis involved in camera-type eye development	5							1	1																	8
GO:0003409	optic cup structural organization	6							0.601	1																	1
GO:0035502	metanephric part of ureteric bud development	4													1	1	1	1									6
GO:0098602	single organism cell adhesion	3			1	1					1	1	1	1	1	2			1	1	1	2	1	2	1	1	782
GO:0016337	single organismal cell-cell adhesion	4									1	1			1	2			1	1	1	1	1	1	1	1	731
GO:0007159	leukocyte cell-cell adhesion	5									1	1			1	1							1	1			492
GO:0034109	homotypic cell-cell adhesion	5									1	1			1	2			1	1	1	1	1	1	1	1	525
GO:0086042	cardiac muscle cell-cardiac muscle cell adhesion	6													1	1			1	1	1	1			1	1	7
GO:0070486	leukocyte aggregation	6									1	1			1	1							1	1			459
GO:0071593	lymphocyte aggregation	7									1	1			1	1							1	1			452
GO:0034113	heterotypic cell-cell adhesion	5													1	1			1	1	1	1			1	1	47
GO:0090136	epithelial cell-cell adhesion	5													1	1			1	1	1	1			1	1	15
GO:0071603	endothelial cell-cell adhesion	6													1	1			1	1	1	1			1	1	4
GO:0008283	cell proliferation	3	1	5	1	3	1	3	1	2	0.902	5	0.531	5	0.652	6	1	3	1	5	0.00193	7	0.0549	7	1	3	1990
GO:0033002	muscle cell proliferation	4	1	1					1	1	1	1			1	1			1	1	1	1			1	1	153
GO:0014855	striated muscle cell proliferation	5	1	1					1	1	1	1			1	1			1	1	1	1			1	1	52
GO:0014856	skeletal muscle cell proliferation	6	1	1							1	1			1	1			1	1	1	1			1	1	14
GO:0014841	skeletal muscle satellite cell proliferation	7	1	1							1	1			1	1			1	1	1	1			1	1	11
GO:0060038	cardiac muscle cell proliferation	6	1	1					1	1	1	1			1	1			1	1	1	1			1	1	39
GO:0048659	smooth muscle cell proliferation	5	1	1							1	1			1	1			1	1	1	1			1	1	105
GO:0061323	cell proliferation involved in heart morphogenesis	4											1	1									1	1			16
GO:0061351	neural precursor cell proliferation	4	1	1							1	1			1	1			1	1	1	2			1	1	151
GO:0021534	cell proliferation in hindbrain	5	1	1							1	1			1	1			1	1	1	1			1	1	19
GO:0021924	cell proliferation in external granule layer	6	1	1							1	1			1	1			1	1	1	1			1	1	18
GO:0021930	cerebellar granule cell precursor proliferation	7	1	1							1	1			1	1			1	1	1	1			1	1	18
GO:0021846	cell proliferation in forebrain	5																			1	1					33
GO:0048144	fibroblast proliferation	4																			1	1	1	1			90
GO:0072089	stem cell proliferation	4	1	1	1	1	1	1			1	1	1	1	1	1	1	1	1	1			1	2			153
GO:0050673	epithelial cell proliferation	4	1	1							0.402	3			1	3			1	1	1	2	1	1	1	1	354
GO:0043616	keratinocyte proliferation	5																					1	1			38
GO:0001935	endothelial cell proliferation	5	1	1							0.0136	3			0.0428	3			1	1	1	1			1	1	113
GO:0070661	leukocyte proliferation	4									1	1			1	1							1	1			279
GO:0032943	mononuclear cell proliferation	5									1	1			1	1							1	1			267
GO:0044700	single organism signaling	3	1	10	1	6	1	9	0.017	11	0.299	9	0.116	9	1	10	1	6	0.0283	11	0.000735	11	0.00388	13	0.00014	11	6337
GO:0035637	multicellular organismal signaling	4													1	1			1	1	1	1	1	1	1	1	189
GO:0044708	single-organism behavior	3	1	1															1	1	1	1					446
GO:0035640	exploration behavior	4																	1	1							26
GO:0007611	learning or memory	4																	1	1							241
GO:0007612	learning	5																	1	1							147
GO:0008306	associative learning	6																	1	1							85
GO:0007632	visual behavior	4																	1	1							60
GO:0008542	visual learning	5																	1	1							55
GO:0008152	metabolic process	2	1.06e-22	36	4.67e-15	25	1.91e-16	27	2.28e-14	24	5.43e-13	22	1.3e-11	20	1.61e-18	30	1.3e-11	20	4.67e-15	25	6.35e-11	19	7.55e-18	29	1.52e-09	17	12055
GO:0044238	primary metabolic process	3	6.88e-25	36	1.41e-16	25	4.36e-18	27	7.92e-16	24	2.5e-14	22	7.9e-13	20	2.41e-20	30	7.9e-13	20	1.41e-16	25	4.44e-12	19	1.3e-19	29	1.41e-10	17	10482
GO:0044710	single-organism metabolic process	3	0.598	11	0.446	9	0.888	9	1	7	0.823	8	1	7	0.47	10	1	6	1	8	0.232	8	0.00846	12	1	3	5684
GO:0044281	small molecule metabolic process	4	1	3	1	3	1	1	1	1	1	1	1	3	1	2	1	2	1	2	1	4	1	6	1	1	2701
GO:0006766	vitamin metabolic process	5							1	1																	175
GO:0006775	fat-soluble vitamin metabolic process	6							1	1																	78
GO:0055114	oxidation-reduction process	4	1	1	1	1			1	1	1	2	1	2	1	2	1	1			1	1	1	1			1111
GO:0070988	demethylation	4	1	1							1	1															69
GO:0006807	nitrogen compound metabolic process	3	2.17e-31	36	4.35e-21	25	5.84e-23	27	3.7e-20	24	2.68e-18	22	1.95e-16	20	9.24e-26	30	1.95e-16	20	4.35e-21	25	1.66e-15	19	7.59e-25	29	1.21e-13	17	6922
GO:0071704	organic substance metabolic process	3	2.08e-24	36	3.04e-16	25	9.98e-18	27	1.65e-15	24	4.9e-14	22	1.46e-12	20	6.04e-20	30	1.46e-12	20	3.04e-16	25	7.96e-12	19	3.17e-19	29	2.38e-10	17	10808
GO:0043170	macromolecule metabolic process	4	8.71e-27	36	6.81e-18	25	1.65e-19	27	4.31e-17	24	1.73e-15	22	6.98e-14	20	6.32e-22	30	6.98e-14	20	6.81e-18	25	4.44e-13	19	3.86e-21	29	1.8e-11	17	9286
GO:0043412	macromolecule modification	5	0.2	10	1	4	1	6	1	7	0.679	7	1	2	1	6	1	2	1	5	1	6	1	6	1	4	4139
GO:0098732	macromolecule deacylation	6	1	1			1	1	1	1					1	1	1	1	1	1	0.0036	3	0.0165	3	0.343	2	87
GO:0010467	gene expression	5	3.39e-35	36	3.12e-19	23	2.26e-23	26	1.08e-22	24	1.27e-20	22	2.99e-14	18	6.24e-29	30	1.5e-18	20	9.94e-24	25	2.93e-13	17	2.78e-23	27	1.94e-15	17	5430
GO:0006406	mRNA export from nucleus	6	1	2	0.833	2	1	2	1	1	1	1			1	2	1	1	1	1			1	1	1	1	82
GO:0019538	protein metabolic process	5	1	7	1	5	1	6	1	7	1	6	1	6	1	7	1	2	1	5	1	7	0.362	10	1	5	5770
GO:0072376	protein activation cascade	6	1	1			1	1																	1	1	98
GO:0042107	cytokine metabolic process	6							1	1													1	1			115
GO:0042089	cytokine biosynthetic process	7							1	1													1	1			113
GO:0042090	interleukin-12 biosynthetic process	8							1	1																	10
GO:0006508	proteolysis	6	1	2	1	1	1	2	1	2	1	2			1	3					1	4	1	2	1	1	1632
GO:0033619	membrane protein proteolysis	7							1	1																	55
GO:0031293	membrane protein intracellular domain proteolysis	8							1	1																	15
GO:0042982	amyloid precursor protein metabolic process	6																					1	1			31
GO:0036211	protein modification process	6	1	7	1	3	1	6	1	6	1	5	1	1	1	6	1	2	1	5	1	6	1	6	1	4	3959
GO:0051604	protein maturation	6	1	1			1	1	1	1			1	1	1	1					1	2	1	2	1	2	354
GO:0016485	protein processing	7	1	1			1	1							1	1					1	1	1	2	1	1	328
GO:0031638	zymogen activation	8													1	1					1	1	1	2			124
GO:1901615	organic hydroxy compound metabolic process	4	1	1	1	1			1	1	1	1	1	1	1	1			1	1	1	2	1	1	1	1	559
GO:0006066	alcohol metabolic process	5	1	1	1	1			1	1	1	1	1	1	1	1			1	1	1	2	1	1	1	1	393
GO:1902652	secondary alcohol metabolic process	6			1	1							1	1							1	1	1	1			128
GO:0019751	polyol metabolic process	6	1	1							1	1			1	1			1	1	1	1			1	1	107
GO:1901135	carbohydrate derivative metabolic process	4	1	1					1	1	1	1			1	1			1	1	1	2	1	1	1	1	1381
GO:1901564	organonitrogen compound metabolic process	4	1	1	1	2			1	1	1	1	1	4	1	1			1	2	1	3	1	4	1	1	2290
GO:0006022	aminoglycan metabolic process	5	1	1					1	1	1	1			1	1			1	1	1	1			1	1	180
GO:0030203	glycosaminoglycan metabolic process	6	1	1					1	1	1	1			1	1			1	1	1	1			1	1	172
GO:1903510	mucopolysaccharide metabolic process	7	1	1					1	1	1	1			1	1			1	1	1	1			1	1	130
GO:0030212	hyaluronan metabolic process	8	1	1					1	1	1	1			1	1			1	1	1	1			1	1	38
GO:1901360	organic cyclic compound metabolic process	4	2.92e-33	36	2.19e-22	25	2.31e-24	27	2.1e-21	24	1.93e-19	22	1.78e-17	20	2.55e-27	30	1.78e-17	20	2.19e-22	25	1.71e-16	19	2.36e-26	29	1.59e-14	17	6143
GO:0005975	carbohydrate metabolic process	4							1	1																	1020
GO:0044723	single-organism carbohydrate metabolic process	5							1	1																	829
GO:0005976	polysaccharide metabolic process	5							1	1																	117
GO:0006629	lipid metabolic process	4	1	1	1	2			1	1	1	1	1	2	1	2	1	2	1	1	0.998	4	1	3	1	1	1363
GO:0008202	steroid metabolic process	5			1	1			1	1			1	1							1	1	1	1			297
GO:0016125	sterol metabolic process	6			1	1							1	1							1	1	1	1			139
GO:0008203	cholesterol metabolic process	7			1	1							1	1							1	1	1	1			125
GO:0042359	vitamin D metabolic process	6							1	1																	19
GO:0032259	methylation	3	0.00478	5	0.72	3	1	2	1	2	1	2	1	1	1	1			1	1			1	1			367
GO:0009056	catabolic process	3	1	3	1	1	1	3	1	1	1	5			1	6	1	1	1	1	0.708	5	1	2	1	3	2256
GO:1901575	organic substance catabolic process	4	1	3	1	1	1	2	1	1	0.67	5			1	5	1	1	1	1	0.294	5	1	2	1	3	1864
GO:0009057	macromolecule catabolic process	5	1	3	1	1	1	2	1	1	0.0861	5			0.493	5	1	1	1	1	0.0368	5	1	2	1	3	1199
GO:0030163	protein catabolic process	6	1	2	1	1	1	2	1	1	1	1			1	1					0.15	4	1	1	1	1	827
GO:1901565	organonitrogen compound catabolic process	5	1	1							1	1			1	1			1	1	1	1			1	1	362
GO:1901136	carbohydrate derivative catabolic process	5	1	1							1	1			1	1			1	1	1	1			1	1	182
GO:0006026	aminoglycan catabolic process	6	1	1							1	1			1	1			1	1	1	1			1	1	69
GO:0006027	glycosaminoglycan catabolic process	7	1	1							1	1			1	1			1	1	1	1			1	1	63
GO:1901361	organic cyclic compound catabolic process	5									1	3			1	3	1	1					1	1	1	1	486
GO:0044712	single-organism catabolic process	4	1	1			1	1	1	1	1	1			1	2			1	1	1	2			1	1	1178
GO:0016042	lipid catabolic process	5																			1	1					299
GO:0030214	hyaluronan catabolic process	5	1	1							1	1			1	1			1	1	1	1			1	1	16
GO:0044033	multi-organism metabolic process	3	0.000345	5			1	1	0.00236	4	0.0926	3			1	2			1	1			0.244	3	1	1	215
GO:0009058	biosynthetic process	3	1.21e-32	36	5.87e-22	25	6.71e-24	27	5.41e-21	24	4.6e-19	22	3.92e-17	20	8.35e-27	30	3.92e-17	20	5.87e-22	25	3.63e-16	19	7.42e-26	29	3.1e-14	17	6390
GO:0044711	single-organism biosynthetic process	4	1	2	1	1	1	1	1	3	1	3	1	1	1	1			1	2	1	3	1	2	1	1	1776
GO:0044283	small molecule biosynthetic process	5	1	1	1	1			1	1	1	1	1	1	1	1			1	1	1	2	1	1	1	1	553
GO:1901576	organic substance biosynthetic process	4	7.47e-33	36	4.2e-22	25	4.67e-24	27	3.92e-21	24	3.42e-19	22	3e-17	20	5.58e-27	30	3e-17	20	4.2e-22	25	2.81e-16	19	5.03e-26	29	2.47e-14	17	6305
GO:1901617	organic hydroxy compound biosynthetic process	5	1	1	1	1			1	1	1	1	1	1	1	1			1	1	1	2	1	1	1	1	231
GO:0046165	alcohol biosynthetic process	6	1	1	1	1			1	1	1	1	1	1	1	1			1	1	1	2	1	1	1	1	153
GO:1902653	secondary alcohol biosynthetic process	7			1	1							1	1							1	1	1	1			50
GO:0046173	polyol biosynthetic process	7	1	1							1	1			1	1			1	1	1	1			1	1	39
GO:1901566	organonitrogen compound biosynthetic process	5			1	2			1	1			1	4					1	1	1	1	1	4			1439
GO:1901362	organic cyclic compound biosynthetic process	5	4.01e-38	36	9.27e-26	25	5.25e-28	27	1.21e-24	24	2.08e-22	22	3.58e-20	20	2.28e-31	30	3.58e-20	20	9.27e-26	25	4.7e-19	19	2.88e-30	29	8.11e-17	17	4506
GO:0009059	macromolecule biosynthetic process	5	1.26e-35	36	5e-24	25	3.9e-26	27	5.57e-23	24	6.94e-21	22	8.68e-19	20	2.73e-29	30	8.68e-19	20	5e-24	25	9.71e-18	19	2.94e-28	29	1.22e-15	17	5283
GO:0045341	MHC class I biosynthetic process	6																			1	1	1	1			7
GO:1901137	carbohydrate derivative biosynthetic process	5							1	1													1	1			894
GO:0006023	aminoglycan biosynthetic process	6							1	1																	115
GO:0006024	glycosaminoglycan biosynthetic process	7							1	1																	114
GO:0030213	hyaluronan biosynthetic process	8							1	1																	14
GO:0008610	lipid biosynthetic process	5	1	1	1	1			1	1	1	1	1	1	1	1			1	1	1	2	1	1	1	1	659
GO:0006694	steroid biosynthetic process	6			1	1			1	1			1	1							1	1	1	1			156
GO:0016126	sterol biosynthetic process	7			1	1							1	1							1	1	1	1			55
GO:0006695	cholesterol biosynthetic process	8			1	1							1	1							1	1	1	1			50
GO:0016051	carbohydrate biosynthetic process	5							1	1																	205
GO:0000271	polysaccharide biosynthetic process	6							1	1																	78
GO:0042983	amyloid precursor protein biosynthetic process	4																					1	1			7
GO:0042094	interleukin-2 biosynthetic process	4																					1	1			22
GO:0071840	cellular component organization or biogenesis	2	0.000347	16	0.00371	12	0.0105	12	0.679	9	5.03e-05	13	0.76	8	0.000904	14	1	5	0.000424	13	5.53e-05	12	0.000499	14	0.0206	9	6327
GO:0044085	cellular component biogenesis	3	1	6	0.0123	8	1	6	1	3	0.426	6	1	5	0.0602	8	1	2	0.0123	8	0.16	6	0.000413	10	1	4	2671
GO:0070271	protein complex biogenesis	4	1	3	1	1	1	2	1	1	0.178	5	1	1	0.0966	6	1	2	0.372	5	1	2	1	2	1	1	1400
GO:0022613	ribonucleoprotein complex biogenesis	4	1	1	0.809	3	1	3	1	1	1	1	1	2	1	2			0.809	3	1	1	1	2	1	2	382
GO:0042254	ribosome biogenesis	5			1	1							1	2					1	1			1	1			235
GO:0000054	ribosomal subunit export from nucleus	6			1	1							1	1									1	1			8
GO:0000055	ribosomal large subunit export from nucleus	7			1	1							1	1									1	1			6
GO:0000056	ribosomal small subunit export from nucleus	7			1	1							1	1									1	1			4
GO:0065007	biological regulation	2	1.88e-23	36	1.4e-15	25	5.2e-17	27	7.18e-15	24	1.88e-13	22	4.95e-12	20	3.79e-19	30	4.95e-12	20	1.4e-15	25	2.54e-11	19	1.87e-18	29	6.72e-10	17	11489
GO:0065008	regulation of biological quality	3	1	7	1	4	1	2	1	5	1	6	1	4	1	7	1	2	1	4	0.0972	7	0.00671	10	0.404	6	3631
GO:0035821	modification of morphology or physiology of other organism	4	0.142	3					1	2	1	1			1	1							1	2	1	1	137
GO:0051817	modification of morphology or physiology of other organism involved in symbiotic interaction	5	0.0912	3					1	2	1	1			1	1							1	2	1	1	118
GO:0051851	modification by host of symbiont morphology or physiology	6	0.00776	3					0.299	2	1	1			1	1							0.467	2	1	1	52
GO:0051235	maintenance of location	4	1	1					1	1	1	1			1	2			1	2	0.126	3	1	1	1	2	286
GO:0051238	sequestering of metal ion	5	1	1							1	1			1	1			1	1	1	1			1	1	119
GO:0019915	lipid storage	5							1	1																	62
GO:0045185	maintenance of protein location	5													1	1			1	1	0.551	2	1	1	1	1	96
GO:0010817	regulation of hormone levels	4													1	1									1	1	507
GO:0009914	hormone transport	5													1	1									1	1	339
GO:0042592	homeostatic process	4	1	5			1	1	1	2	1	4			1	3			1	3	1	4	1	2	1	2	1605
GO:0060249	anatomical structure homeostasis	5	1	2					1	1	1	1							1	1	1	1	1	1			373
GO:0048878	chemical homeostasis	5	1	2			1	1	1	1	1	2			1	2			1	2	0.337	4	1	2	1	2	1022
GO:0050801	ion homeostasis	6	1	1			1	1			1	2			1	2			1	2	1	2	1	1	1	2	679
GO:0098771	inorganic ion homeostasis	7	1	1			1	1			1	2			1	2			1	2	1	2	1	1	1	2	618
GO:0055080	cation homeostasis	7	1	1			1	1			1	2			1	2			1	2	1	2	1	1	1	2	604
GO:0072507	divalent inorganic cation homeostasis	8	1	1			1	1			1	2			1	2			1	2	1	2	1	1	1	2	402
GO:0055065	metal ion homeostasis	8	1	1			1	1			1	2			1	2			1	2	1	2	1	1	1	2	555
GO:0055074	calcium ion homeostasis	9	1	1			1	1			1	2			1	2			1	2	1	2	1	1	1	2	375
GO:0033500	carbohydrate homeostasis	6	1	1					1	1											1	2	1	1			230
GO:0042593	glucose homeostasis	7	1	1					1	1											1	2	1	1			230
GO:0048872	homeostasis of number of cells	5	1	2					1	1	1	2			1	2			1	1							238
GO:0002262	myeloid cell homeostasis	6	1	2					1	1	1	2			1	2											129
GO:0034101	erythrocyte homeostasis	7	1	2					1	1	1	1			1	1											106
GO:0001776	leukocyte homeostasis	6									1	1			1	1											85
GO:0001780	neutrophil homeostasis	7									1	1			1	1											12
GO:0097350	neutrophil clearance	8									1	1			1	1											2
GO:0048871	multicellular organismal homeostasis	5	1	1					1	1									1	1							347
GO:0001894	tissue homeostasis	6	1	1					1	1									1	1							221
GO:0010669	epithelial structure maintenance	7	1	1					1	1																	24
GO:0048873	homeostasis of number of cells within a tissue	7																	1	1							32
GO:0031647	regulation of protein stability	4	1	1			1	1	1	1					1	1					1	1	1	2	1	1	213
GO:0050821	protein stabilization	5	1	1			1	1	1	1					1	1					1	1	1	1	1	1	128
GO:0042391	regulation of membrane potential	4													1	1			1	2	1	1	1	1	1	1	358
GO:0051899	membrane depolarization	5																	1	1							93
GO:0001508	action potential	5													1	1			1	1	1	1	1	1	1	1	123
GO:0086001	cardiac muscle cell action potential	6													1	1			1	1	1	1			1	1	47
GO:0050878	regulation of body fluid levels	4			1	2							1	2							1	3	1	2			732
GO:0007599	hemostasis	5			1	2							1	2							1	2	1	2			578
GO:0007596	blood coagulation	6			1	2							1	2							1	2	1	2			573
GO:0007589	body fluid secretion	5																			1	1					100
GO:0007595	lactation	6																			1	1					46
GO:0050803	regulation of synapse structure or activity	4																	1	1							238
GO:0065009	regulation of molecular function	3	1	4	1	4	1	3	1	6	1	5	1	4	0.706	7	1	1	1	5	0.233	6	0.00798	9	1	3	2862
GO:0044093	positive regulation of molecular function	4	1	3	1	4	1	3	1	5	0.616	5	1	3	0.417	6	1	1	1	5	0.27	5	0.00271	8	1	2	1830
GO:0040030	regulation of molecular function, epigenetic	4	1	1																							1
GO:0051098	regulation of binding	4			1	2			1	1	1	2	1	2	0.639	3	1	1					1	2			282
GO:0043393	regulation of protein binding	5			1	1			1	1			1	1									1	1			168
GO:0051101	regulation of DNA binding	5			1	1					0.724	2	1	1	0.0224	3	1	1					1	1			91
GO:0051099	positive regulation of binding	5			1	2			1	1	1	2	1	2	1	2	1	1					1	2			126
GO:0032092	positive regulation of protein binding	6			1	1			1	1			1	1									1	1			75
GO:0043388	positive regulation of DNA binding	6			1	1					0.133	2	1	1	0.3	2	1	1					1	1			39
GO:0044092	negative regulation of molecular function	4							1	2			1	1	1	2			1	1	1	2	1	2	1	1	1130
GO:0051100	negative regulation of binding	5													1	1											128
GO:0043392	negative regulation of DNA binding	6													1	1											47
GO:0009987	cellular process	2	6.78e-19	36	2.04e-12	25	1.36e-13	27	7.81e-12	24	1.14e-10	22	1.68e-09	20	2.37e-15	30	1.68e-09	20	2.04e-12	25	6.44e-09	19	8.74e-15	29	9.5e-08	17	15371
GO:0036166	phenotypic switching	3	1	1																							1
GO:0044764	multi-organism cellular process	3	6.31e-08	10	1	2	0.0443	5	3.34e-05	7	0.28	4	1	3	2.65e-07	9	1	2	0.513	4	1	1	0.000151	7	1	2	814
GO:0016032	viral process	4	5.4e-08	10	1	2	0.0411	5	2.99e-05	7	0.264	4	1	3	2.3e-07	9	1	2	0.483	4	1	1	0.000136	7	1	2	801
GO:0019042	viral latency	5	0.0349	2			1	1							0.0225	2			1	1					1	1	11
GO:0046794	transport of virus	5			1	1							1	1									1	1			37
GO:0019058	viral life cycle	5	0.00047	6	1	1	1	2	2.87e-05	6	0.794	3	1	1	0.119	4	1	1	1	2	1	1	0.00356	5	1	1	447
GO:0019080	viral gene expression	6	0.000273	5			1	1	0.00195	4	0.0804	3			1	2			1	1			0.212	3	1	1	205
GO:0046718	viral entry into host cell	6							1	1																	114
GO:0075733	intracellular transport of virus	6			1	1							1	1									1	1			34
GO:0019043	establishment of viral latency	5	0.0286	2			1	1							0.0184	2			1	1					1	1	10
GO:0075713	establishment of integrated proviral latency	6	0.0178	2			1	1							0.0115	2			1	1					1	1	8
GO:0019079	viral genome replication	5	1	1			1	1	1	1					1	2	1	1	1	1							93
GO:0019076	viral release from host cell	5							1	1											1	1	1	1			35
GO:0044763	single-organism cellular process	3	0.000308	22	0.00546	16	0.0234	16	2.31e-06	19	0.00311	15	3.3e-05	16	0.000128	20	0.00402	14	0.00546	16	0.000124	15	4.98e-05	20	0.0173	12	12573
GO:0007272	ensheathment of neurons	4	1	1					1	1					1	1	1	1									113
GO:0008366	axon ensheathment	5	1	1					1	1					1	1	1	1									113
GO:0042552	myelination	6	1	1					1	1					1	1	1	1									110
GO:0007017	microtubule-based process	4			1	1							1	1	1	1			1	3			1	3	1	1	617
GO:0030029	actin filament-based process	4			1	3							1	3	1	1			1	1	1	3	0.383	4	1	1	639
GO:0060242	contact inhibition	4																					1	1			8
GO:0007049	cell cycle	4	1	5	1	2	1	2	1	2	0.565	5	1	3	1	4	1	2	1	3	0.248	5	0.289	6	1	3	1796
GO:0000278	mitotic cell cycle	5	1	2	1	1	1	1	1	2	1	2	1	1	1	1					1	1	1	4			1038
GO:0007154	cell communication	4	1	11	1	6	1	9	0.0192	11	0.331	9	0.129	9	1	10	1	6	0.032	11	0.000839	11	0.0045	13	0.00016	11	6420
GO:0007267	cell-cell signaling	5													1	1			1	1					1	1	1229
GO:0099536	synaptic signaling	6																	1	1							716
GO:0099537	trans-synaptic signaling	7																	1	1							716
GO:0007268	synaptic transmission	8																	1	1							716
GO:0019226	transmission of nerve impulse	5																					1	1			72
GO:0019228	neuronal action potential	6																					1	1			34
GO:0051301	cell division	4	1	1	1	2	1	1	1	1	1	2	1	2	1	2	1	1	1	1	1	1	1	2	1	1	672
GO:0007059	chromosome segregation	4	1	1	1	1	1	1	1	1	1	1			1	1					1	1					279
GO:0001775	cell activation	4	1	1	1	3	1	1	1	1	1	1	1	2	1	2					1	2	1	3			989
GO:0045321	leukocyte activation	5	1	1	1	1	1	1	1	1	1	1			1	2							1	1			750
GO:0002274	myeloid leukocyte activation	6									1	1			1	1											160
GO:0001773	myeloid dendritic cell activation	7									1	1			1	1											33
GO:0042116	macrophage activation	7									1	1			1	1											54
GO:0002270	plasmacytoid dendritic cell activation	6									0.519	1			0.855	1											1
GO:0046649	lymphocyte activation	6	1	1	1	1	1	1	1	1	1	1			1	2							1	1			644
GO:0042113	B cell activation	7	1	1	1	1	1	1	1	1					1	1							1	1			242
GO:0046651	lymphocyte proliferation	7									1	1			1	1							1	1			264
GO:0042100	B cell proliferation	8																					1	1			91
GO:0070489	T cell aggregation	6									1	1			1	1							1	1			451
GO:0042110	T cell activation	7									1	1			1	1							1	1			451
GO:0046631	alpha-beta T cell activation	8									1	1			1	1											117
GO:0035710	CD4-positive, alpha-beta T cell activation	9									1	1			1	1											65
GO:0035711	T-helper 1 cell activation	10									1	1			1	1											3
GO:0042098	T cell proliferation	8									1	1			1	1							1	1			180
GO:0050798	activated T cell proliferation	9									1	1			1	1											46
GO:0002263	cell activation involved in immune response	5	1	1	1	1	1	1			1	1			1	2											211
GO:0002366	leukocyte activation involved in immune response	6	1	1	1	1	1	1			1	1			1	2											209
GO:0002275	myeloid cell activation involved in immune response	7									1	1			1	1											67
GO:0002281	macrophage activation involved in immune response	8									1	1			1	1											10
GO:0002285	lymphocyte activation involved in immune response	7	1	1	1	1	1	1			1	1			1	2											149
GO:0002312	B cell activation involved in immune response	8	1	1	1	1	1	1							1	1											59
GO:0002286	T cell activation involved in immune response	8									1	1			1	1											88
GO:0002287	alpha-beta T cell activation involved in immune response	9									1	1			1	1											47
GO:0030168	platelet activation	5			1	2							1	2							1	2	1	2			259
GO:0006928	movement of cell or subcellular component	4	1	3	1	3					1	4	1	2	1	4	1	1	1	2	0.388	5	1	4	1	2	1979
GO:0030048	actin filament-based movement	5			1	1							1	1	1	1			1	1	0.762	2	1	1	1	1	113
GO:0070252	actin-mediated cell contraction	6													1	1			1	1	1	1			1	1	94
GO:0086003	cardiac muscle cell contraction	7													1	1			1	1	1	1			1	1	46
GO:0086002	cardiac muscle cell action potential involved in contraction	8													1	1			1	1	1	1			1	1	33
GO:0086005	ventricular cardiac muscle cell action potential	9													1	1			1	1	1	1			1	1	24
GO:0030050	vesicle transport along actin filament	6			1	1							1	1							1	1	1	1			4
GO:0048870	cell motility	5	1	3	1	2					1	4	1	1	1	4	1	1	1	2	0.885	4	1	3	1	2	1320
GO:0016477	cell migration	6	1	3	1	2					1	4	1	1	1	4	1	1	1	2	0.641	4	1	3	1	2	1211
GO:0001667	ameboidal-type cell migration	7	1	1							1	2			1	2			1	1	1	2	1	1	1	1	323
GO:0010761	fibroblast migration	8	1	1							1	1			1	1			1	1	0.0905	2	1	1	1	1	39
GO:0010631	epithelial cell migration	8	1	1							1	2			1	2			1	1	1	1			1	1	220
GO:0043542	endothelial cell migration	9	1	1							1	2			1	2			1	1	1	1			1	1	152
GO:0043534	blood vessel endothelial cell migration	10	1	1							0.454	2			1	2			1	1	1	1			1	1	72
GO:0002042	cell migration involved in sprouting angiogenesis	11	1	1							1	1			1	1			1	1	1	1			1	1	33
GO:0014812	muscle cell migration	7	1	1							1	1															66
GO:0014909	smooth muscle cell migration	8	1	1							1	1															55
GO:0050900	leukocyte migration	7									1	1			1	1							1	1			362
GO:0097529	myeloid leukocyte migration	8									1	1			1	1							1	1			160
GO:0097530	granulocyte migration	9																					1	1			113
GO:1990266	neutrophil migration	10																					1	1			96
GO:0045123	cellular extravasation	8																					1	1			44
GO:0072672	neutrophil extravasation	9																					1	1			8
GO:0050901	leukocyte tethering or rolling	9																					1	1			20
GO:0036336	dendritic cell migration	8									1	1			1	1											27
GO:0008219	cell death	4	0.308	7	1	5	1	3	0.00108	8	0.094	6	0.00333	7	0.00814	8	1	4	1	4	0.433	5	1.85e-06	11	1	3	2026
GO:0070265	necrotic cell death	5			1	1							1	1									1	1			49
GO:0070997	neuron death	5	1	1					1	1													1	1			295
GO:0012501	programmed cell death	5	0.222	7	1	5	1	3	0.00072	8	0.0699	6	0.00234	7	0.0055	8	1	4	1	4	0.338	5	1.06e-06	11	1	3	1921
GO:0006915	apoptotic process	6	1	5	1	5	1	3	0.0098	7	0.733	5	0.00219	7	0.0556	7	1	4	1	3	1	4	9.48e-07	11	1	2	1901
GO:0097285	cell-type specific apoptotic process	7	1	1					1	1			1	1									1	3			461
GO:0071887	leukocyte apoptotic process	8																					1	1			102
GO:0070227	lymphocyte apoptotic process	9																					1	1			71
GO:0001783	B cell apoptotic process	10																					1	1			24
GO:0010657	muscle cell apoptotic process	8											1	1									1	1			52
GO:0010658	striated muscle cell apoptotic process	9											1	1									1	1			28
GO:0051402	neuron apoptotic process	8	1	1					1	1													1	1			226
GO:0043276	anoikis	7									1	1	1	1	1	1	1	1			1	1					28
GO:1902742	apoptotic process involved in development	7																			1	1	1	1			32
GO:0097300	programmed necrotic cell death	6			1	1							1	1									1	1			41
GO:0070266	necroptotic process	7			1	1							1	1									1	1			35
GO:0022402	cell cycle process	4	1	3	1	2	1	1	1	2	1	4	1	3	1	2	1	1	1	2	0.883	4	0.606	5	1	1	1319
GO:0098813	nuclear chromosome segregation	5	1	1	1	1			1	1					1	1					1	1					216
GO:0044770	cell cycle phase transition	5	1	2					1	1	1	2			1	1			1	1	1	2	1	2			507
GO:0044843	cell cycle G1/S phase transition	6	1	2							1	1									1	1	1	2			259
GO:0044839	cell cycle G2/M phase transition	6							1	1									1	1							197
GO:0000075	cell cycle checkpoint	5													1	1					1	1	1	1			249
GO:0031570	DNA integrity checkpoint	6																			1	1	1	1			166
GO:0031577	spindle checkpoint	6													1	1											54
GO:0071173	spindle assembly checkpoint	7													1	1											46
GO:0051304	chromosome separation	5													1	1											80
GO:1903047	mitotic cell cycle process	5	1	2	1	1	1	1	1	2	1	2	1	1	1	1					1	1	1	3			865
GO:0044772	mitotic cell cycle phase transition	6	1	2					1	1	1	1			1	1					1	1	1	2			483
GO:0000086	G2/M transition of mitotic cell cycle	7							1	1																	193
GO:0000082	G1/S transition of mitotic cell cycle	7	1	2							1	1									1	1	1	2			250
GO:0016049	cell growth	4	1	3			1	2	1	1					1	1	1	1	1	1	1	1	1	2	1	1	497
GO:0048869	cellular developmental process	4	0.000626	13	0.000401	11	0.0751	9	1.81e-05	12	0.0869	8	1.8e-05	11	0.000448	12	0.00349	9	1	7	0.000143	10	2.52e-05	13	1	4	4112
GO:0030154	cell differentiation	5	0.000301	13	0.000211	11	0.0455	9	8.85e-06	12	0.0552	8	9.28e-06	11	0.000225	12	0.00206	9	1	6	7.84e-05	10	1.18e-05	13	1	4	3859
GO:0090077	foam cell differentiation	6							1	1																	31
GO:0010742	macrophage derived foam cell differentiation	7							1	1																	31
GO:0061318	renal filtration cell differentiation	6													1	1	1	1									17
GO:0048863	stem cell differentiation	6	1	3	1	1	1	2	1	1	1	2	1	1	1	2	1	1	1	2	1	1	1	2	1	1	281
GO:0048762	mesenchymal cell differentiation	7					1	1			1	1															188
GO:0045444	fat cell differentiation	6			1	1	1	1	1	1											1	2					203
GO:0050872	white fat cell differentiation	7																			0.0112	2					14
GO:0042692	muscle cell differentiation	6	1	1	1	2	1	1	1	1			1	2	1	1	1	1					1	3			367
GO:0051146	striated muscle cell differentiation	7			1	1			1	1			1	2			1	1					0.411	3			257
GO:0014902	myotube differentiation	8											1	1									1	1			111
GO:0030855	epithelial cell differentiation	6	1	1	1	2	1	1			1	1	1	1	1	2	1	2	1	1	1	3	1	2	1	1	612
GO:0002065	columnar/cuboidal epithelial cell differentiation	7	1	1	1	1	1	1			1	1			1	1			1	1	1	2			1	1	142
GO:0060563	neuroepithelial cell differentiation	8	1	1							1	1			1	1			1	1	1	1			1	1	85
GO:0061101	neuroendocrine cell differentiation	9	1	1							1	1			1	1			1	1	1	1			1	1	9
GO:0002067	glandular epithelial cell differentiation	8	1	1							1	1			1	1			1	1	0.143	2			1	1	49
GO:0060129	thyroid-stimulating hormone-secreting cell differentiation	9	1	1							1	1			1	1			1	1	1	1			1	1	4
GO:0060575	intestinal epithelial cell differentiation	8			1	1	1	1																			18
GO:0045446	endothelial cell differentiation	7			1	1							1	1			1	1					1	1			96
GO:0009913	epidermal cell differentiation	7																					1	1			189
GO:0030216	keratinocyte differentiation	8																					1	1			129
GO:0060644	mammary gland epithelial cell differentiation	7	1	1							1	1			1	1			1	1	1	1			1	1	16
GO:0001649	osteoblast differentiation	6	0.494	3			1	2	1	1	1	2	1	2	0.00609	4	0.0599	3	1	2	1	2			1	2	209
GO:0022008	neurogenesis	6	1	5	1	2	1	2	0.771	5	0.0386	6	1	1	1	3	1	1	1	2	1	1	1	3	1	2	1727
GO:0042063	gliogenesis	7	1	1					1	1	1	1			1	1			1	1	1	1			1	1	242
GO:0048699	generation of neurons	7	1	4	1	2	1	2	1	4	0.379	5	1	1	1	3	1	1	1	1	1	1	1	2	1	2	1646
GO:0021872	forebrain generation of neurons	8	1	1					1	1																	74
GO:0010001	glial cell differentiation	6	1	1					1	1	1	1			1	1			1	1	1	1			1	1	186
GO:0014037	Schwann cell differentiation	7							1	1																	33
GO:0030182	neuron differentiation	6	1	3	1	2	1	2	1	3	1	3	1	1	1	2	1	1	1	1	1	1			1	2	1532
GO:0021953	central nervous system neuron differentiation	7	1	2					1	2																	182
GO:0021879	forebrain neuron differentiation	8	1	1					1	1																	67
GO:0061005	cell differentiation involved in kidney development	6													1	1	1	1					1	1			46
GO:0035850	epithelial cell differentiation involved in kidney development	7													1	1	1	1					1	1			36
GO:0072311	glomerular epithelial cell differentiation	8													1	1	1	1									18
GO:0072112	glomerular visceral epithelial cell differentiation	9													1	1	1	1									17
GO:0072160	nephron tubule epithelial cell differentiation	8																					1	1			15
GO:0072202	cell differentiation involved in metanephros development	7																					1	1			17
GO:0072257	metanephric nephron tubule epithelial cell differentiation	8																					1	1			7
GO:0035051	cardiocyte differentiation	6							1	1													1	1			121
GO:0055007	cardiac muscle cell differentiation	7							1	1													1	1			99
GO:0055012	ventricular cardiac muscle cell differentiation	8							1	1																	20
GO:0060591	chondroblast differentiation	6	1	1							1	1			1	1			1	1	1	1			1	1	5
GO:0060479	lung cell differentiation	6																			1	1	1	1			31
GO:0060487	lung epithelial cell differentiation	7																			1	1	1	1			30
GO:0060509	Type I pneumocyte differentiation	8																			1	1					8
GO:0002244	hematopoietic progenitor cell differentiation	6	1	1					1	1	1	1			1	1											160
GO:0002521	leukocyte differentiation	6			1	1			1	1	1	1	1	1	1	2							1	1			470
GO:0097028	dendritic cell differentiation	7									1	1			1	1											43
GO:0030098	lymphocyte differentiation	7							1	1	1	1			1	1											314
GO:0030183	B cell differentiation	8							1	1																	117
GO:0030217	T cell differentiation	8									1	1			1	1											213
GO:0046632	alpha-beta T cell differentiation	9									1	1			1	1											84
GO:0043367	CD4-positive, alpha-beta T cell differentiation	10									1	1			1	1											58
GO:0002292	T cell differentiation involved in immune response	9									1	1			1	1											54
GO:0002293	alpha-beta T cell differentiation involved in immune response	10									1	1			1	1											47
GO:0002294	CD4-positive, alpha-beta T cell differentiation involved in immune response	11									1	1			1	1											46
GO:0042093	T-helper cell differentiation	12									1	1			1	1											44
GO:0045063	T-helper 1 cell differentiation	13									1	1			1	1											17
GO:0030099	myeloid cell differentiation	6	1	2	1	2			1	2	1	1	1	2	1	2					1	2	0.978	3			346
GO:0030219	megakaryocyte differentiation	7	1	1					1	1	1	1			1	1											50
GO:0002573	myeloid leukocyte differentiation	7			1	1							1	1	1	1							1	1			194
GO:0030224	monocyte differentiation	8			1	1							1	1	1	1							1	1			29
GO:0030218	erythrocyte differentiation	7	1	2					1	1	1	1			1	1											97
GO:0043353	enucleate erythrocyte differentiation	8	1	1																							8
GO:0001570	vasculogenesis	6																					1	1			74
GO:0021533	cell differentiation in hindbrain	6	1	1					1	1																	25
GO:0021702	cerebellar Purkinje cell differentiation	7	1	1					1	1																	13
GO:0001829	trophectodermal cell differentiation	6	1	1																							19
GO:0035914	skeletal muscle cell differentiation	6	0.0183	3	1	1	4.3e-05	4	0.00428	3	0.417	2			1	1	1	1	0.591	2	1	1	1	1	1	1	69
GO:0060128	corticotropin hormone secreting cell differentiation	6	1	1							1	1			1	1			1	1	1	1			1	1	3
GO:0045165	cell fate commitment	5	1	2					1	1	1	1			1	1			1	1	1	2	1	1	1	1	262
GO:0048663	neuron fate commitment	6	1	1					1	1																	76
GO:0021877	forebrain neuron fate commitment	7	1	1					1	1																	14
GO:0021898	commitment of multipotent stem cells to neuronal lineage in forebrain	8	1	1					1	1																	4
GO:0001708	cell fate specification	5	1	1							1	1			1	1			1	1	1	1			1	1	88
GO:0048468	cell development	5	1	4	0.0377	7	1	5	1	4	0.158	6	0.883	5	1	4	1	3	1	2	0.665	5	0.0114	8	1	2	2225
GO:0098751	bone cell development	6							1	1																	30
GO:0061515	myeloid cell development	6							1	1																	52
GO:0035855	megakaryocyte development	7							1	1																	17
GO:0048864	stem cell development	6	1	1			1	1			1	2			1	1			1	1	1	1			1	1	180
GO:0014031	mesenchymal cell development	7					1	1			1	1															175
GO:0055001	muscle cell development	6											1	1									1	1			158
GO:0055002	striated muscle cell development	7											1	1									1	1			145
GO:0048747	muscle fiber development	8											1	1									1	1			60
GO:0014904	myotube cell development	8											1	1									1	1			39
GO:0048741	skeletal muscle fiber development	9											1	1									1	1			35
GO:0002064	epithelial cell development	6			1	1	1	1							1	1	1	1									227
GO:0002066	columnar/cuboidal epithelial cell development	7			1	1	1	1																			38
GO:0060576	intestinal epithelial cell development	8			1	1	1	1																			12
GO:0048666	neuron development	6	1	1	1	2	1	2	1	1	1	3	1	1	1	2	1	1	1	1	1	1			1	2	1269
GO:0021782	glial cell development	6							1	1																	80
GO:0014044	Schwann cell development	7							1	1																	26
GO:0048469	cell maturation	5			1	1															1	1					157
GO:0010623	developmental programmed cell death	5	1	1							1	1			1	1			1	1	0.105	2	1	1	1	1	42
GO:0060561	apoptotic process involved in morphogenesis	6																			1	1	1	1			26
GO:0060057	apoptotic process involved in mammary gland involution	7																			1	1	1	1			4
GO:0046666	retinal cell programmed cell death	6	1	1							1	1			1	1			1	1	1	1			1	1	8
GO:0007569	cell aging	4	1	1											1	1			1	1	1	1	1	1			93
GO:0019725	cellular homeostasis	4	1	3			1	1			1	3			1	2			1	2	1	2	1	2	1	2	801
GO:0055082	cellular chemical homeostasis	5	1	2			1	1			1	2			1	2			1	2	1	2	1	2	1	2	668
GO:0006873	cellular ion homeostasis	6	1	1			1	1			1	2			1	2			1	2	1	2	1	1	1	2	540
GO:0030003	cellular cation homeostasis	7	1	1			1	1			1	2			1	2			1	2	1	2	1	1	1	2	526
GO:0072503	cellular divalent inorganic cation homeostasis	8	1	1			1	1			1	2			1	2			1	2	1	2	1	1	1	2	383
GO:0006875	cellular metal ion homeostasis	8	1	1			1	1			1	2			1	2			1	2	1	2	1	1	1	2	487
GO:0006874	cellular calcium ion homeostasis	9	1	1			1	1			1	2			1	2			1	2	1	2	1	1	1	2	363
GO:0032469	endoplasmic reticulum calcium ion homeostasis	10																			1	1	1	1			21
GO:0051480	regulation of cytosolic calcium ion concentration	10	1	1			1	1			1	2			1	2			1	2	1	2	1	1	1	2	260
GO:0051481	negative regulation of cytosolic calcium ion concentration	11					1	1											1	1					1	1	11
GO:0007204	positive regulation of cytosolic calcium ion concentration	11	1	1							1	2			1	2			1	1	1	2	1	1	1	1	239
GO:0060402	calcium ion transport into cytosol	12	1	1							1	1			1	1			1	1	0.916	2	1	1	1	1	124
GO:1902656	calcium ion import into cytosol	13	1	1							1	1			1	1			1	1	1	1			1	1	103
GO:0051208	sequestering of calcium ion	10	1	1							1	1			1	1			1	1	1	1			1	1	105
GO:0001678	cellular glucose homeostasis	6	1	1																			1	1			135
GO:0097194	execution phase of apoptosis	4									0.805	2			0.0263	3									1	1	96
GO:0055085	transmembrane transport	4	1	1	1	1					1	1	1	1	1	1			1	1	1	2	1	2	1	1	1419
GO:0034220	ion transmembrane transport	5	1	1	1	1					1	1	1	1	1	1			1	1	1	2	1	2	1	1	1017
GO:0098660	inorganic ion transmembrane transport	6	1	1	1	1					1	1	1	1	1	1			1	1	1	2	1	1	1	1	739
GO:0098655	cation transmembrane transport	6	1	1	1	1					1	1	1	1	1	1			1	1	1	2	1	1	1	1	723
GO:0098662	inorganic cation transmembrane transport	7	1	1	1	1					1	1	1	1	1	1			1	1	1	2	1	1	1	1	657
GO:0035725	sodium ion transmembrane transport	8			1	1							1	1							1	1	1	1			125
GO:0070588	calcium ion transmembrane transport	8	1	1							1	1			1	1			1	1	1	1			1	1	258
GO:0097553	calcium ion transmembrane import into cytosol	9	1	1							1	1			1	1			1	1	1	1			1	1	103
GO:0051651	maintenance of location in cell	4													1	1			1	1	0.621	2	1	1	1	1	102
GO:0032507	maintenance of protein location in cell	5													1	1			1	1	0.474	2	1	1	1	1	89
GO:0072595	maintenance of protein localization in organelle	6																			1	1	1	1			30
GO:0051457	maintenance of protein location in nucleus	7																			1	1	1	1			15
GO:0032940	secretion by cell	4			1	2					1	1	1	2	1	2					1	3	1	3	1	1	963
GO:0023061	signal release	5													1	1									1	1	450
GO:0046879	hormone secretion	6													1	1									1	1	329
GO:0030072	peptide hormone secretion	7													1	1									1	1	273
GO:0006887	exocytosis	5			1	2							1	2							1	2	1	2			371
GO:0002576	platelet degranulation	6			0.938	2							0.516	2							0.453	2	1	2			87
GO:0009306	protein secretion	5									1	1			1	2					1	1	1	1	1	1	495
GO:0050663	cytokine secretion	6									1	1			1	1					1	1	1	1			170
GO:0072604	interleukin-6 secretion	7									1	1			1	1											24
GO:0050701	interleukin-1 secretion	7									1	1			1	1					1	1	1	1			39
GO:0050702	interleukin-1 beta secretion	8									1	1			1	1					1	1	1	1			35
GO:1990774	tumor necrosis factor secretion	7									1	1			1	1											6
GO:0030073	insulin secretion	6													1	1									1	1	229
GO:0006457	protein folding	3							1	1			1	1							1	1	1	2	1	1	240
GO:0006458	'de novo' protein folding	4																					1	1			57
GO:0051084	'de novo' posttranslational protein folding	5																					1	1			53
GO:0022417	protein maturation by protein folding	4							1	1			1	1							1	1			1	1	9
GO:0006914	autophagy	3					1	1			1	1			1	2											522
GO:0016236	macroautophagy	4					1	1																			358
GO:0016043	cellular component organization	3	0.000261	16	0.00298	12	0.00845	12	0.582	9	3.93e-05	13	1	7	0.000703	14	1	5	0.000334	13	4.39e-05	12	0.000387	14	0.0174	9	6199
GO:0043933	macromolecular complex subunit organization	4	2.44e-07	14	6.78e-05	10	0.00206	9	0.0805	7	0.00339	8	0.21	6	0.000563	10	1	3	6.78e-05	10	0.00083	8	1.12e-07	13	0.0694	6	2636
GO:0071826	ribonucleoprotein complex subunit organization	5	1	1	1	2	0.191	3	1	1	1	1			1	2			0.146	3	1	1	1	1	1	2	213
GO:0071824	protein-DNA complex subunit organization	5	7.11e-06	6					1	2	2.17e-05	5			0.309	3			0.161	3			0.261	3			220
GO:0071822	protein complex subunit organization	5	0.193	7	1	4	1	2	1	2	0.0618	6	1	4	0.48	6	1	2	0.148	6	1	4	0.00329	8	1	1	1879
GO:0022411	cellular component disassembly	4	1	4			1	1	1	1	1	3			0.959	4			1	1			1	2	1	1	773
GO:0032984	macromolecular complex disassembly	5	0.0733	4					1	1	1	1			1	1			1	1			1	2			320
GO:0032986	protein-DNA complex disassembly	6	4.62e-07	4					1	1	1	1			1	1			1	1			0.0484	2			17
GO:0043241	protein complex disassembly	6	0.064	4					1	1	1	1			1	1			1	1			1	2			309
GO:0006921	cellular component disassembly involved in execution phase of apoptosis	5									0.417	2			0.00972	3									1	1	69
GO:0030262	apoptotic nuclear changes	6									0.0779	2			0.000763	3									1	1	30
GO:0034330	cell junction organization	4			1	2							1	2	1	1			1	1	0.101	3	1	2	1	1	265
GO:0045216	cell-cell junction organization	5			1	2							1	2	1	1			1	1	0.0678	3	1	2	1	1	232
GO:0034332	adherens junction organization	6			1	1							1	1	1	1			1	1	0.873	2	1	1	1	1	121
GO:0002934	desmosome organization	6													1	1			1	1	1	1			1	1	9
GO:0032989	cellular component morphogenesis	4	1	1	1	3	1	2	1	2	1	3	1	2	1	2	1	1	1	2	1	3	1	3	1	2	1567
GO:0000902	cell morphogenesis	5	1	1	1	3	1	2	1	2	1	3	1	2	1	2	1	1	1	2	1	3	1	3	1	2	1487
GO:0000904	cell morphogenesis involved in differentiation	6	1	1	1	3	1	2	1	2	1	3	1	2	1	2	1	1	1	1	1	3	1	2	1	2	1068
GO:0036344	platelet morphogenesis	7			1	1			1	1			1	1							1	1	1	1			21
GO:0030220	platelet formation	8			1	1			1	1			1	1							1	1	1	1			20
GO:0003382	epithelial cell morphogenesis	7													1	1	1	1									58
GO:0060231	mesenchymal to epithelial transition	8													1	1	1	1									19
GO:0034446	substrate adhesion-dependent cell spreading	7			1	1							1	1							1	1	1	1			82
GO:0048667	cell morphogenesis involved in neuron differentiation	7	1	1	1	1	1	1	1	1	1	2			1	1			1	1	1	1			1	2	848
GO:0001837	epithelial to mesenchymal transition	7					1	1			1	1															108
GO:0032990	cell part morphogenesis	5	1	1	1	1	1	1	1	1	1	2			1	1			1	1	1	1			1	2	1133
GO:0010256	endomembrane system organization	4													1	2			1	1	1	1			1	2	546
GO:0061024	membrane organization	4													1	2			1	1	1	1			1	2	1129
GO:0044802	single-organism membrane organization	5													1	2			1	1	1	1			1	2	915
GO:0007009	plasma membrane organization	6													1	1			1	1	1	1			1	1	274
GO:0072657	protein localization to membrane	6													1	1			1	1	1	1			1	1	497
GO:0090150	establishment of protein localization to membrane	7													1	1			1	1	1	1			1	1	372
GO:0072659	protein localization to plasma membrane	7													1	1			1	1	1	1			1	1	211
GO:0090002	establishment of protein localization to plasma membrane	8													1	1			1	1	1	1			1	1	140
GO:0006996	organelle organization	4	0.00161	12	0.0158	9	1	7	0.091	8	0.000347	10	1	6	0.0921	9	1	2	0.0158	9	2.86e-06	11	0.000904	11	0.0456	7	3711
GO:0048285	organelle fission	5	1	1	1	2	1	1	1	1	1	1	1	1	1	1					1	1	1	2			589
GO:0000280	nuclear division	6	1	1	1	2	1	1	1	1	1	1	1	1	1	1					1	1	1	2			550
GO:1902589	single-organism organelle organization	5	0.00431	10	0.957	6	1	6	1	5	0.413	6	1	3	1	6	1	1	0.116	7	0.155	6	3.06e-05	11	1	3	2656
GO:1903008	organelle disassembly	6					1	1																			237
GO:0061726	mitochondrion disassembly	7					1	1																			219
GO:0007067	mitotic nuclear division	6	1	1	1	1	1	1	1	1	1	1	1	1	1	1							1	2			427
GO:0007010	cytoskeleton organization	5			1	3							1	3	1	2			1	4	1	3	0.0182	6	1	2	1091
GO:0030036	actin cytoskeleton organization	6			1	3							1	3							1	2	0.225	4			556
GO:0007015	actin filament organization	7			1	2							1	2							1	2	0.838	3			328
GO:0051639	actin filament network formation	8			1	1							1	1							1	1	1	1			4
GO:0051764	actin crosslink formation	8			1	1							1	1							1	1	1	1			8
GO:0061572	actin filament bundle organization	8			1	2							1	2							0.961	2	0.0511	3			127
GO:0000226	microtubule cytoskeleton organization	6			1	1							1	1	1	1			1	3			1	3	1	1	434
GO:1902850	microtubule cytoskeleton organization involved in mitosis	7													1	1											52
GO:0001578	microtubule bundle formation	7													1	1											72
GO:0034453	microtubule anchoring	7													1	1											43
GO:0008608	attachment of spindle microtubules to kinetochore	8													1	1											26
GO:0031109	microtubule polymerization or depolymerization	7													1	1											89
GO:0007051	spindle organization	7			1	1							1	1	1	1							1	2			133
GO:0007052	mitotic spindle organization	8			1	1							1	1	1	1							1	1			81
GO:0007016	cytoskeletal anchoring at plasma membrane	6													1	1			1	1	1	1			1	1	13
GO:0007005	mitochondrion organization	5	1	1			1	3	1	1	1	2	1	1					1	1	1	2			1	2	765
GO:0000422	mitophagy	6					1	1																			219
GO:0006626	protein targeting to mitochondrion	6					1	1	1	1	1	1	1	1							1	2			1	1	159
GO:0051276	chromosome organization	5	2.5e-09	12	0.135	5	1	4	0.00628	6	0.00339	6	1	2	0.00183	7	1	2	0.00838	6	0.00119	6	0.00134	7	1	3	1126
GO:0000972	transcription-dependent tethering of RNA polymerase II gene DNA at nuclear periphery	6	1	1					1	1																	3
GO:0032200	telomere organization	6	1	1							1	1									1	1	1	1			145
GO:0071103	DNA conformation change	6	1	2							1	2			0.521	3			1	1			1	1			263
GO:0006323	DNA packaging	7	1	2							1	2			0.233	3			1	1			1	1			200
GO:0032392	DNA geometric change	7	1	1							0.347	2			0.00738	3											63
GO:0032508	DNA duplex unwinding	8	1	1											1	1											58
GO:0070193	synaptonemal complex organization	6			1	1															1	1					23
GO:0006325	chromatin organization	6	1.07e-09	11	0.412	4	0.578	4	0.0171	5	0.0102	5	1	2	0.0614	5	1	1	0.0219	5	0.00429	5	0.000102	7	1	3	768
GO:0061641	CENP-A containing chromatin organization	7																	1	1							42
GO:0006333	chromatin assembly or disassembly	7	0.000173	5					1	1	0.0612	3			0.191	3			1	2			0.161	3			187
GO:0031498	chromatin disassembly	8	7.52e-07	4					1	1	1	1			1	1			1	1			0.0609	2			19
GO:0070828	heterochromatin organization	7	1	1											1	1											14
GO:0016568	chromatin modification	7	4e-09	10	1	3	0.247	4	0.144	4	1	2	1	1	1	3	1	1	0.00743	5	1	2	2.22e-05	7	1	2	614
GO:0016569	covalent chromatin modification	8	0.0118	5	1	2	0.0696	4	1	3	1	1			1	2	1	1	1	2	1	2	0.00337	5	1	2	442
GO:0006338	chromatin remodeling	8	7.71e-07	6	1	2	1	2	1	1	1	1	1	1	1	2			1	2			1	2			152
GO:0031055	chromatin remodeling at centromere	9																	1	1							44
GO:0043044	ATP-dependent chromatin remodeling	9	0.00023	4	1	1	1	1	1	1	1	1	1	1					0.698	2			0.971	2			75
GO:0034728	nucleosome organization	7	0.000111	5					1	1	1	2			1	2			1	2			1	2			171
GO:0034724	DNA replication-independent nucleosome organization	8																	1	1							53
GO:0043486	histone exchange	8																	1	1							54
GO:0006337	nucleosome disassembly	8	4.62e-07	4					1	1	1	1			1	1			1	1			0.0484	2			17
GO:0000819	sister chromatid segregation	6	1	1					1	1					1	1											153
GO:0000070	mitotic sister chromatid segregation	7													1	1											129
GO:0051306	mitotic sister chromatid separation	8													1	1											65
GO:0007062	sister chromatid cohesion	6	1	1					1	1																	43
GO:0070601	centromeric sister chromatid cohesion	7	1	1																							7
GO:0006997	nucleus organization	5									1	1			1	2					1	1	1	1	1	1	131
GO:0030575	nuclear body organization	6																			1	1	1	1			8
GO:0030578	PML body organization	7																			1	1	1	1			5
GO:0006998	nuclear envelope organization	6													1	1									1	1	76
GO:0071763	nuclear membrane organization	7													1	1									1	1	7
GO:0071765	nuclear inner membrane organization	8													1	1									0.702	1	2
GO:0030264	nuclear fragmentation involved in apoptotic nuclear change	8													1	1									1	1	3
GO:0031023	microtubule organizing center organization	5																	1	2			1	1	1	1	116
GO:0051297	centrosome organization	6																	1	2			1	1	1	1	108
GO:0007098	centrosome cycle	7																	0.698	2			1	1	1	1	75
GO:0051298	centrosome duplication	7																	0.432	2			1	1	1	1	59
GO:0022607	cellular component assembly	4	1	6	0.0747	7	1	6	1	3	0.282	6	1	3	0.035	8	1	2	0.00703	8	0.105	6	0.00243	9	1	4	2476
GO:0065003	macromolecular complex assembly	5	1	5	1	3	1	5	1	2	0.0297	6	1	1	0.00177	8	1	2	0.00538	7	1	3	1	5	1	3	1649
GO:0034622	cellular macromolecular complex assembly	6	1	2	1	3	0.0805	5	1	2	0.00107	6	1	1	0.146	5	1	1	0.0527	5	1	1	1	2	1	2	923
GO:0065004	protein-DNA complex assembly	7	1	1					1	1	0.001	4			1	2			1	2			1	1			193
GO:0034508	centromere complex assembly	8																	1	1							51
GO:0022618	ribonucleoprotein complex assembly	7	1	1	1	2	0.165	3	1	1	1	1			1	2			0.127	3	1	1	1	1	1	2	203
GO:0006461	protein complex assembly	6	1	3	1	1	1	2	1	1	0.178	5	1	1	0.0966	6	1	2	0.372	5	1	2	1	2	1	1	1400
GO:0051259	protein oligomerization	7													1	1			1	2	1	1			1	1	463
GO:0051291	protein heterooligomerization	8													1	1			1	1	1	1			1	1	114
GO:0043623	cellular protein complex assembly	7			1	1	1	2			1	1	1	1	1	1	1	1	1	1							540
GO:0051258	protein polymerization	8													1	1											234
GO:0046785	microtubule polymerization	9													1	1											53
GO:0033108	mitochondrial respiratory chain complex assembly	8					1	1			1	1							1	1							82
GO:0031497	chromatin assembly	6	1	2							1	2			0.125	3			1	1			1	1			162
GO:0016584	nucleosome positioning	7	1	1																							8
GO:0031507	heterochromatin assembly	7	1	1											1	1											10
GO:0035986	senescence-associated heterochromatin focus assembly	8	1	1											1	1											3
GO:0006334	nucleosome assembly	7									1	1			1	1			1	1							144
GO:0006336	DNA replication-independent nucleosome assembly	8																	1	1							53
GO:0034080	CENP-A containing nucleosome assembly	9																	1	1							42
GO:0070925	organelle assembly	5			1	1	1	1	1	1	1	1			1	1			1	2			1	2	1	2	581
GO:0098534	centriole assembly	6																	0.103	2			1	1	1	1	29
GO:0007099	centriole replication	7																	0.0827	2			1	1	1	1	26
GO:0034063	stress granule assembly	6			1	1	1	1	1	1	1	1													1	1	10
GO:0042255	ribosome assembly	6																	1	1							52
GO:0051225	spindle assembly	6													1	1							1	1			81
GO:0090307	mitotic spindle assembly	7													1	1											47
GO:0034329	cell junction assembly	5			1	2							1	2	1	1			1	1	0.0713	3	1	2	1	1	236
GO:0007044	cell-substrate junction assembly	6			1	1							1	1							1	1	1	1			88
GO:0007043	cell-cell junction assembly	6			1	1							1	1	1	1			1	1	0.597	2	1	1	1	1	100
GO:0043297	apical junction assembly	7			1	1							1	1							1	1	1	1			65
GO:0070830	bicellular tight junction assembly	7			1	1							1	1							1	1	1	1			56
GO:0002159	desmosome assembly	7													1	1			1	1	1	1			1	1	4
GO:0034333	adherens junction assembly	6			1	1							1	1	1	1			1	1	0.383	2	1	1	1	1	80
GO:0007045	cell-substrate adherens junction assembly	7			1	1							1	1							1	1	1	1			70
GO:0048041	focal adhesion assembly	8			1	1							1	1							1	1	1	1			70
GO:0051017	actin filament bundle assembly	5			1	2							1	2							0.916	2	0.0476	3			124
GO:0030030	cell projection organization	4	1	1	1	3	1	3	1	1	1	3	1	1	1	2	1	1	1	1	1	1			1	2	1521
GO:0032528	microvillus organization	5			1	1	1	1																			23
GO:0030031	cell projection assembly	5			1	1	1	1																			375
GO:0030033	microvillus assembly	6			1	1	1	1																			18
GO:0048858	cell projection morphogenesis	5	1	1	1	1	1	1	1	1	1	2			1	1			1	1	1	1			1	2	1113
GO:0060271	cilium morphogenesis	6			1	1	1	1	1	1	1	1													1	1	228
GO:0031175	neuron projection development	5	1	1	1	2	1	2	1	1	1	3	1	1	1	2	1	1	1	1	1	1			1	2	1125
GO:0061564	axon development	6	1	1							1	1			1	1			1	1	1	1			1	1	789
GO:0016358	dendrite development	6			1	1	1	1	1	1	1	1													1	1	202
GO:0048812	neuron projection morphogenesis	6	1	1	1	1	1	1	1	1	1	2			1	1			1	1	1	1			1	2	881
GO:0048813	dendrite morphogenesis	7			1	1	1	1	1	1	1	1													1	1	119
GO:0007409	axonogenesis	7	1	1							1	1			1	1			1	1	1	1			1	1	759
GO:0097485	neuron projection guidance	7	1	1							1	1			1	1			1	1	1	1			1	1	581
GO:0007411	axon guidance	8	1	1							1	1			1	1			1	1	1	1			1	1	581
GO:0043062	extracellular structure organization	4	1	1	1	1					1	1	1	1	1	1			1	1	1	2	1	1	1	1	395
GO:0030198	extracellular matrix organization	5	1	1	1	1					1	1	1	1	1	1			1	1	1	2	1	1	1	1	394
GO:0044237	cellular metabolic process	3	5.01e-25	36	1.13e-16	25	3.43e-18	27	6.41e-16	24	2.06e-14	22	6.62e-13	20	1.85e-20	30	6.62e-13	20	1.13e-16	25	3.76e-12	19	1.01e-19	29	1.21e-10	17	10390
GO:0006793	phosphorus metabolic process	4	1	2	1	1	1	2	1	1	1	2	1	1	1	3	1	1	1	2	1	3	1	3	1	3	3149
GO:0006796	phosphate-containing compound metabolic process	5	1	2	1	1	1	2	1	1	1	2	1	1	1	3	1	1	1	2	1	3	1	3	1	3	3088
GO:0016310	phosphorylation	6	1	2	1	1	1	2	1	1	1	2	1	1	1	3	1	1	1	2	1	2	1	2	1	3	2213
GO:0016311	dephosphorylation	6																					1	1			434
GO:0019637	organophosphate metabolic process	5	1	1							1	1			1	1			1	1	1	2			1	1	1081
GO:0090407	organophosphate biosynthetic process	6	1	1							1	1			1	1			1	1	1	1			1	1	595
GO:0019693	ribose phosphate metabolic process	6																			1	1					534
GO:0043647	inositol phosphate metabolic process	6	1	1							1	1			1	1			1	1	1	1			1	1	68
GO:0032958	inositol phosphate biosynthetic process	7	1	1							1	1			1	1			1	1	1	1			1	1	19
GO:0044248	cellular catabolic process	4	1	1	1	1	1	2	1	1	1	4			1	5	1	1			1	4	1	2	1	1	1736
GO:0044260	cellular macromolecule metabolic process	4	5.38e-28	36	9.85e-19	25	2.04e-20	27	6.74e-18	24	3.16e-16	22	1.49e-14	20	6.21e-23	30	1.49e-14	20	9.85e-19	25	1.02e-13	19	4.1e-22	29	4.83e-12	17	8596
GO:0043414	macromolecule methylation	5	0.00127	5	0.327	3	1	2	1	2	1	2	1	1	1	1			1	1			1	1			280
GO:0020027	hemoglobin metabolic process	5	1	1					1	1																	17
GO:0044267	cellular protein metabolic process	5	1	7	1	5	1	6	1	6	1	6	1	5	1	7	1	2	1	5	1	6	0.142	10	1	4	5157
GO:0006464	cellular protein modification process	6	1	7	1	3	1	6	1	6	1	5	1	1	1	6	1	2	1	5	1	6	1	6	1	4	3959
GO:0070647	protein modification by small protein conjugation or removal	7	1	1	1	1	1	2	1	2	1	2			1	1			1	1	1	3	1	1			1023
GO:0032446	protein modification by small protein conjugation	8	1	1	1	1	1	2	1	2	1	2			1	1			1	1	1	3	1	1			896
GO:0016567	protein ubiquitination	9	1	1	1	1	1	1	1	1	1	1			1	1			1	1	1	3	1	1			784
GO:0006513	protein monoubiquitination	10			1	1	1	1	1	1																	53
GO:0000209	protein polyubiquitination	10			1	1					1	1							1	1	1	1					224
GO:0070979	protein K11-linked ubiquitination	11									1	1									1	1					27
GO:0051865	protein autoubiquitination	10	1	1			1	1													1	1					51
GO:0043543	protein acylation	7	1	2			1	1	1	2									1	1			1	1			217
GO:0006473	protein acetylation	8	1	2			1	1	1	2									1	1			1	1			187
GO:0006475	internal protein amino acid acetylation	9	1	2			1	1	1	2									1	1			1	1			162
GO:0008213	protein alkylation	7	0.225	3	1	2	1	1	1	1	1	1			1	1			1	1			1	1			160
GO:0006479	protein methylation	8	0.225	3	1	2	1	1	1	1	1	1			1	1			1	1			1	1			160
GO:0035601	protein deacylation	7	1	1			1	1	1	1					1	1	1	1	1	1	0.00336	3	0.0154	3	0.327	2	85
GO:0006476	protein deacetylation	8	1	1			1	1	1	1					1	1	1	1	1	1	0.00279	3	0.0128	3	0.29	2	80
GO:0090042	tubulin deacetylation	9							1	1																	8
GO:0018193	peptidyl-amino acid modification	7	1	5	1	1	1	3	1	4	1	2			1	1			1	1	1	2	1	3			1367
GO:0018205	peptidyl-lysine modification	8	0.00709	5	1	1	1	3	0.0268	4	1	2			1	1			1	1	1	2	1	3			398
GO:0016925	protein sumoylation	9	1	1			1	1	1	1	1	1									0.961	2	1	1			127
GO:0018394	peptidyl-lysine acetylation	9	1	2			1	1	1	2									1	1			1	1			161
GO:0018393	internal peptidyl-lysine acetylation	10	1	2			1	1	1	2									1	1			1	1			156
GO:0018022	peptidyl-lysine methylation	9	1	2	1	1	1	1	1	1	1	1			1	1			1	1			1	1			109
GO:0018026	peptidyl-lysine monomethylation	10																	1	1							8
GO:0018023	peptidyl-lysine trimethylation	10																	1	1							31
GO:0018027	peptidyl-lysine dimethylation	10																	1	1							16
GO:0043687	post-translational protein modification	7	1	1			1	1	1	1	1	1									1	2	1	1			478
GO:0031365	N-terminal protein amino acid modification	7							1	1																	28
GO:0006474	N-terminal protein amino acid acetylation	8							1	1																	16
GO:0018076	N-terminal peptidyl-lysine acetylation	9							1	1																	4
GO:0006470	protein dephosphorylation	7																					1	1			335
GO:0006468	protein phosphorylation	7	1	2	1	1	1	2	1	1	1	2	1	1	1	3	1	1	1	2	1	2	1	2	1	3	1849
GO:0100002	negative regulation of protein kinase activity by protein phosphorylation	8																	1	1							8
GO:0016570	histone modification	7	0.0102	5	1	2	0.062	4	0.972	3	1	1			1	2	1	1	1	2	1	2	0.00291	5	1	2	429
GO:0061647	histone H3-K9 modification	8																	1	1							38
GO:0016575	histone deacetylation	8	1	1			1	1							1	1	1	1	1	1	0.277	2	0.00784	3	0.209	2	68
GO:0070932	histone H3 deacetylation	9																					1	1			22
GO:0016574	histone ubiquitination	8			1	1	1	1																			40
GO:0033523	histone H2B ubiquitination	9			1	1																					10
GO:0010390	histone monoubiquitination	9			1	1	1	1																			23
GO:0016571	histone methylation	8	0.114	3	1	2	1	1	1	1	1	1			1	1			1	1			1	1			127
GO:0034968	histone lysine methylation	9	1	2	1	1	1	1	1	1	1	1			1	1			1	1			1	1			99
GO:0051568	histone H3-K4 methylation	10	1	1					1	1	1	1							1	1			1	1			53
GO:0080182	histone H3-K4 trimethylation	11																	1	1							12
GO:0044648	histone H3-K4 dimethylation	11																	0.646	1							1
GO:0070734	histone H3-K27 methylation	10	1	1	1	1	1	1							1	1											15
GO:0016573	histone acetylation	8	1	2			1	1	1	2									1	1			1	1			151
GO:0043969	histone H2B acetylation	9							0.601	1																	1
GO:0043967	histone H4 acetylation	9					1	1	1	1									1	1							64
GO:0043984	histone H4-K16 acetylation	10																	1	1							19
GO:0043966	histone H3 acetylation	9	1	1					1	1									1	1							61
GO:0043974	histone H3-K27 acetylation	10																	1	1							3
GO:0043973	histone H3-K4 acetylation	10	1	1					0.601	1																	1
GO:0044154	histone H3-K14 acetylation	10																	1	1							9
GO:0043970	histone H3-K9 acetylation	10																	1	1							10
GO:0043968	histone H2A acetylation	9					1	1																			15
GO:0009100	glycoprotein metabolic process	5																					1	1			552
GO:0044265	cellular macromolecule catabolic process	5	1	1	1	1	1	1	1	1	0.516	4			1	4	1	1			0.261	4	1	2	1	1	956
GO:0043632	modification-dependent macromolecule catabolic process	6	1	1	1	1	1	1	1	1	1	1			1	1					0.0428	4	1	1			598
GO:0044257	cellular protein catabolic process	6	1	1	1	1	1	1	1	1	1	1			1	1					0.0709	4	1	1			681
GO:0051603	proteolysis involved in cellular protein catabolic process	7	1	1	1	1	1	1	1	1	1	1			1	1					0.0592	4	1	1			650
GO:0010498	proteasomal protein catabolic process	8	1	1											1	1					0.361	3	1	1			409
GO:0019941	modification-dependent protein catabolic process	8	1	1	1	1	1	1	1	1	1	1			1	1					0.0406	4	1	1			590
GO:0006511	ubiquitin-dependent protein catabolic process	9	1	1	1	1	1	1	1	1	1	1			1	1					0.0385	4	1	1			582
GO:0043161	proteasome-mediated ubiquitin-dependent protein catabolic process	10	1	1											1	1					0.298	3	1	1			383
GO:0031145	anaphase-promoting complex-dependent proteasomal ubiquitin-dependent protein catabolic process	11													1	1											120
GO:0042787	protein ubiquitination involved in ubiquitin-dependent protein catabolic process	10					1	1	1	1											1	1	1	1			200
GO:0072593	reactive oxygen species metabolic process	4							1	1																	248
GO:0046483	heterocycle metabolic process	4	7e-34	36	8.12e-23	25	7.93e-25	27	8.1e-22	24	8.07e-20	22	8.07e-18	20	7.78e-28	30	8.07e-18	20	8.12e-23	25	8.07e-17	19	7.49e-27	29	8.1e-15	17	5905
GO:0046700	heterocycle catabolic process	5									0.778	3			1	3	1	1					1	1	1	1	444
GO:0006091	generation of precursor metabolites and energy	4									1	1	1	1	1	1	1	1			1	1					491
GO:0022900	electron transport chain	5									1	1	1	1	1	1	1	1			1	1					147
GO:0015980	energy derivation by oxidation of organic compounds	5									1	1	1	1	1	1	1	1			1	1					402
GO:0045333	cellular respiration	6									1	1	1	1	1	1	1	1			1	1					213
GO:0022904	respiratory electron transport chain	7									1	1	1	1	1	1	1	1			1	1					145
GO:0006725	cellular aromatic compound metabolic process	4	7.72e-34	36	8.69e-23	25	8.53e-25	27	8.65e-22	24	8.57e-20	22	8.52e-18	20	8.43e-28	30	8.52e-18	20	8.69e-23	25	8.5e-17	19	8.1e-27	29	8.48e-15	17	5921
GO:0019439	aromatic compound catabolic process	5									0.836	3			1	3	1	1					1	1	1	1	455
GO:0006790	sulfur compound metabolic process	4	1	1																							383
GO:0070813	hydrogen sulfide metabolic process	5	1	1																							7
GO:0044249	cellular biosynthetic process	4	4.32e-33	36	2.87e-22	25	3.1e-24	27	2.72e-21	24	2.45e-19	22	2.21e-17	20	3.54e-27	30	2.21e-17	20	2.87e-22	25	2.11e-16	19	3.24e-26	29	1.91e-14	17	6210
GO:0019438	aromatic compound biosynthetic process	5	1.45e-38	36	4.58e-26	25	2.45e-28	27	6.17e-25	24	1.12e-22	22	2.04e-20	20	9.78e-32	30	2.04e-20	20	4.58e-26	25	2.75e-19	19	1.27e-30	29	5.02e-17	17	4381
GO:0044272	sulfur compound biosynthetic process	5	1	1																							217
GO:0070814	hydrogen sulfide biosynthetic process	6	1	1																							5
GO:0018130	heterocycle biosynthetic process	5	1.42e-38	36	4.5e-26	25	2.41e-28	27	6.06e-25	24	1.1e-22	22	2.01e-20	20	9.58e-32	30	2.01e-20	20	4.5e-26	25	2.71e-19	19	1.25e-30	29	4.96e-17	17	4378
GO:0009110	vitamin biosynthetic process	5							1	1																	23
GO:0042362	fat-soluble vitamin biosynthetic process	6							1	1																	14
GO:0042368	vitamin D biosynthetic process	7							1	1																	11
GO:0034645	cellular macromolecule biosynthetic process	5	1.63e-33	35	6.89e-18	22	7.07e-22	25	6.96e-21	23	3.53e-21	22	6.93e-13	17	3.55e-27	29	4.69e-19	20	2.31e-24	25	2.97e-10	15	5.81e-24	27	1.34e-13	16	5123
GO:0042541	hemoglobin biosynthetic process	6	1	1					1	1																	11
GO:0009101	glycoprotein biosynthetic process	6																					1	1			498
GO:0034641	cellular nitrogen compound metabolic process	4	4.25e-32	36	1.4e-21	25	1.72e-23	27	1.25e-20	24	9.89e-19	22	7.87e-17	20	2.37e-26	30	7.87e-17	20	1.4e-21	25	7.02e-16	19	2.04e-25	29	5.61e-14	17	6616
GO:0044270	cellular nitrogen compound catabolic process	5									0.778	3			1	3	1	1					1	1	1	1	444
GO:0044271	cellular nitrogen compound biosynthetic process	5	1.07e-36	36	9.01e-25	25	6.13e-27	27	1.08e-23	24	1.54e-21	22	2.21e-19	20	3.5e-30	30	2.21e-19	20	9.01e-25	25	2.64e-18	19	4.03e-29	29	3.8e-16	17	4934
GO:0072521	purine-containing compound metabolic process	5																			1	1					575
GO:0043603	cellular amide metabolic process	5			1	2							0.399	4					1	1	1	1	1	4			1004
GO:0043604	amide biosynthetic process	6			1	2							0.155	4					1	1	1	1	0.828	4			784
GO:0006518	peptide metabolic process	6			1	2							0.198	4					1	1	1	1	1	4			835
GO:0043043	peptide biosynthetic process	7			1	2							0.104	4					1	1	1	1	0.558	4			706
GO:0006412	translation	8			1	2							0.0882	4					1	1	1	1	0.477	4			677
GO:0002181	cytoplasmic translation	9			1	1							1	1									1	1			41
GO:0006139	nucleobase-containing compound metabolic process	5	2.25e-34	36	3.69e-23	25	3.38e-25	27	3.8e-22	24	4.03e-20	22	4.3e-18	20	3.02e-28	30	4.3e-18	20	3.69e-23	25	4.44e-17	19	3e-27	29	4.74e-15	17	5722
GO:0090304	nucleic acid metabolic process	6	4.2e-36	36	2.33e-24	25	1.71e-26	27	2.68e-23	24	3.56e-21	22	4.72e-19	20	1.1e-29	30	4.72e-19	20	2.33e-24	25	5.45e-18	19	1.22e-28	29	7.26e-16	17	5125
GO:0090305	nucleic acid phosphodiester bond hydrolysis	7	1	2			1	1			0.159	3	1	1	0.493	3	1	1					1	1			258
GO:0006259	DNA metabolic process	7	0.00017	8	0.0693	5	1.24e-05	8	0.844	4	5.56e-05	7	0.361	4	0.0129	6	1	3	0.00374	6	0.285	4	1	3	1	2	978
GO:0006310	DNA recombination	8	1	2	1	2	0.511	3			0.00562	4			0.0246	4	1	1	1	2	1	1	1	1	1	1	298
GO:0035825	reciprocal DNA recombination	9			1	1	1	1			1	1									1	1					40
GO:0006312	mitotic recombination	9	1	1							1	1															41
GO:0016444	somatic cell DNA recombination	9	1	1	1	1	1	1			0.255	2			0.00462	3											54
GO:0002562	somatic diversification of immune receptors via germline recombination within a single locus	10	1	1	1	1	1	1			0.255	2			0.00462	3											54
GO:0033151	V(D)J recombination	11									0.0164	2			0.0372	2											14
GO:0016447	somatic recombination of immunoglobulin gene segments	11	1	1	1	1	1	1							1	1											44
GO:0002204	somatic recombination of immunoglobulin genes involved in immune response	12	1	1	1	1	1	1							1	1											39
GO:0045190	isotype switching	13	1	1	1	1	1	1							1	1											39
GO:0006266	DNA ligation	8									0.0244	2			0.0555	2											17
GO:0010216	maintenance of DNA methylation	8	1	1			1	1																			6
GO:0022616	DNA strand elongation	8	1	1							1	1															44
GO:0006304	DNA modification	8	0.00163	4	1	1	1	1	1	1	1	2	1	1					1	1							122
GO:0035510	DNA dealkylation	9	1	1							1	1															22
GO:0044728	DNA methylation or demethylation	9	0.000797	4	1	1	1	1	1	1	0.908	2	1	1					1	1							102
GO:0006305	DNA alkylation	9	0.0393	3	1	1	1	1	1	1	1	1	1	1					1	1							89
GO:0006260	DNA replication	8	1	2	1	1	1	2	1	1	1	2	1	1	1	1	1	1	1	2	1	1	1	2	1	1	338
GO:0006278	RNA-dependent DNA replication	9																			1	1	1	1			57
GO:0006261	DNA-dependent DNA replication	9	1	2			1	1	1	1	1	2			1	1			1	1							127
GO:0044786	cell cycle DNA replication	10	1	1					1	1	1	1															50
GO:0042023	DNA endoreduplication	11							1	1																	9
GO:0033260	nuclear DNA replication	11	1	1							1	1															41
GO:0006268	DNA unwinding involved in DNA replication	10	1	1											1	1											8
GO:0006271	DNA strand elongation involved in DNA replication	9	1	1							1	1															38
GO:0006265	DNA topological change	8									0.00648	2			0.0147	2											9
GO:0000723	telomere maintenance	8	1	1							1	1									1	1	1	1			132
GO:0010833	telomere maintenance via telomere lengthening	9	1	1							1	1									1	1	1	1			84
GO:0007004	telomere maintenance via telomerase	10																			1	1	1	1			54
GO:0032201	telomere maintenance via semi-conservative replication	10	1	1							1	1															27
GO:0000722	telomere maintenance via recombination	9	1	1							1	1															30
GO:0016070	RNA metabolic process	7	8.87e-38	36	1.61e-25	25	9.52e-28	27	2.06e-24	24	3.38e-22	22	5.56e-20	20	4.41e-31	30	5.56e-20	20	1.61e-25	25	7.14e-19	19	5.46e-30	29	1.18e-16	17	4606
GO:0000959	mitochondrial RNA metabolic process	8					1	1			1	1							1	1							32
GO:0016071	mRNA metabolic process	8	1.87e-07	9	3.79e-09	9	1.65e-10	10	5.84e-06	7	2.76e-06	7	1	1	6.09e-10	10	5.81e-05	6	8.28e-06	7	1	2	0.000785	6	0.000847	5	631
GO:0034660	ncRNA metabolic process	8	1	1	1	1			1	1			1	2							1	1	1	2			480
GO:0006399	tRNA metabolic process	9			1	1							1	1									1	1			203
GO:0016072	rRNA metabolic process	9											1	1													161
GO:0010586	miRNA metabolic process	9							1	1																	16
GO:0010501	RNA secondary structure unwinding	8	0.621	2			0.303	2	0.224	2					1	1	1	1	0.251	2	1	1			1	1	45
GO:0043631	RNA polyadenylation	8			1	1																					38
GO:0090501	RNA phosphodiester bond hydrolysis	8	1	1							1	1															113
GO:0090502	RNA phosphodiester bond hydrolysis, endonucleolytic	9	1	1							1	1															62
GO:0006396	RNA processing	8	6.86e-08	10	8.52e-10	10	4.64e-11	11	1.02e-06	8	1.69e-05	7	1	3	8.13e-09	10	0.000273	6	1.53e-06	8	1	3	0.00016	7	8.35e-05	6	821
GO:0036260	RNA capping	9	0.419	2			1	1	0.151	2	0.119	2			1	1			1	1			1	1			37
GO:0009452	7-methylguanosine RNA capping	10	0.419	2			1	1	0.151	2	0.119	2			1	1			1	1			1	1			37
GO:0034470	ncRNA processing	9			1	1							1	2									1	1			331
GO:0008033	tRNA processing	10			1	1							1	1									1	1			148
GO:0006364	rRNA processing	10											1	1													155
GO:0008380	RNA splicing	9	2.23e-09	9	3.69e-09	8	1.14e-12	10	1.84e-07	7	8.66e-08	7	1	1	4.25e-12	10	3.01e-06	6	2.63e-07	7	1	2	4.19e-05	6	7.2e-05	5	383
GO:0000375	RNA splicing, via transesterification reactions	10	1.23e-08	8	3.68e-08	7	8.01e-12	9	2.58e-08	7	1.21e-08	7	1	1	2.27e-09	8	5.58e-07	6	3.68e-08	7	1	2	7.88e-06	6	0.00144	4	289
GO:0000377	RNA splicing, via transesterification reactions with bulged adenosine as nucleophile	11	1.1e-08	8	3.34e-08	7	7.06e-12	9	2.34e-08	7	1.1e-08	7	1	1	2.03e-09	8	5.14e-07	6	3.34e-08	7	1	2	7.25e-06	6	0.00137	4	285
GO:0031123	RNA 3'-end processing	9	1	1	1	2	1	1	1	1	1	1			1	1	1	1	1	1			1	1	1	1	109
GO:0006397	mRNA processing	9	1.02e-08	9	2e-10	9	6.22e-12	10	6.01e-07	7	2.83e-07	7	1	1	2.32e-11	10	8.28e-06	6	8.55e-07	7	1	2	0.000114	6	0.000167	5	454
GO:0031124	mRNA 3'-end processing	10	1	1	0.854	2	1	1	1	1	1	1			1	1	1	1	1	1			1	1	1	1	83
GO:0006378	mRNA polyadenylation	11			1	1																					37
GO:0006370	7-methylguanosine mRNA capping	10	0.333	2			1	1	0.12	2	0.0945	2			1	1			1	1			1	1			33
GO:0000398	mRNA splicing, via spliceosome	10	1.1e-08	8	3.34e-08	7	7.06e-12	9	2.34e-08	7	1.1e-08	7	1	1	2.03e-09	8	5.14e-07	6	3.34e-08	7	1	2	7.25e-06	6	0.00137	4	285
GO:0000380	alternative mRNA splicing, via spliceosome	11	0.515	2	0.00103	3	0.00135	3	2.89e-06	4	0.00063	3			0.002	3	0.000441	3	0.208	2			0.29	2	0.000244	3	41
GO:0045292	mRNA cis splicing, via spliceosome	11	1	1			1	1							1	1			1	1					1	1	16
GO:0000387	spliceosomal snRNP assembly	11			1	1	1	1							1	1			1	1	1	1	1	1			41
GO:0000244	spliceosomal tri-snRNP complex assembly	12			1	1	1	1							1	1			1	1			1	1			12
GO:0000245	spliceosomal complex assembly	11	1	1	1	1	0.469	2							0.621	2			0.389	2			1	1	1	1	56
GO:0006376	mRNA splice site selection	12	1	1			1	1							1	1			1	1					1	1	28
GO:0000395	mRNA 5'-splice site recognition	13	1	1			1	1							1	1			1	1					1	1	6
GO:0034655	nucleobase-containing compound catabolic process	6									0.566	3			1	3	1	1					1	1	1	1	398
GO:0006308	DNA catabolic process	7									0.0888	2			0.201	2											32
GO:0000737	DNA catabolic process, endonucleolytic	8									0.0454	2			0.103	2											23
GO:0006309	apoptotic DNA fragmentation	9									0.0275	2			0.0624	2											18
GO:0006401	RNA catabolic process	7									1	1			1	1	1	1					1	1	1	1	241
GO:0006402	mRNA catabolic process	8									1	1			1	1	1	1					1	1	1	1	212
GO:0000956	nuclear-transcribed mRNA catabolic process	9									1	1			1	1	1	1					1	1	1	1	196
GO:0034654	nucleobase-containing compound biosynthetic process	6	8.04e-39	36	3.04e-26	25	1.58e-28	27	4.16e-25	24	7.81e-23	22	1.47e-20	20	5.98e-32	30	1.47e-20	20	3.04e-26	25	2.02e-19	19	7.9e-31	29	3.8e-17	17	4310
GO:0032774	RNA biosynthetic process	7	2.23e-40	36	2.53e-27	25	1.07e-29	27	3.82e-26	24	8.76e-24	22	2.01e-21	20	3.02e-33	30	2.01e-21	20	2.53e-27	25	3.05e-20	19	4.41e-32	29	7.02e-18	17	3903
GO:0097659	nucleic acid-templated transcription	8	7.07e-41	36	1.14e-27	25	4.54e-30	27	1.78e-26	24	4.35e-24	22	1.06e-21	20	1.16e-33	30	1.06e-21	20	1.14e-27	25	1.66e-20	19	1.75e-32	29	4.09e-18	17	3781
GO:0006351	transcription, DNA-templated	9	3.36e-38	35	8.34e-21	22	3.31e-25	25	5.9e-24	23	3.98e-24	22	3.93e-15	17	4.7e-31	29	9.82e-22	20	1.03e-27	25	3.19e-12	15	1.46e-27	27	9.86e-16	16	3766
GO:0098781	ncRNA transcription	10	1	1																			1	1			40
GO:0009303	rRNA transcription	11	1	1																			1	1			30
GO:0006366	transcription from RNA polymerase II promoter	10	2.06e-31	28	1.12e-16	17	3.89e-25	22	2.94e-25	21	2.25e-16	16	3.34e-07	10	1.19e-19	20	1.05e-08	11	1.83e-24	21	4.87e-06	9	3.83e-20	20	1.79e-13	13	2036
GO:0061614	pri-miRNA transcription from RNA polymerase II promoter	11	1	1																			1	1			12
GO:0100057	regulation of phenotypic switching by transcription from RNA polymerase II promoter	11	1	1																							1
GO:0006360	transcription from RNA polymerase I promoter	10	1	1			1	1			1	1							1	1			1	1			59
GO:0042790	transcription of nuclear large rRNA transcript from RNA polymerase I promoter	11	1	1																			1	1			12
GO:0009299	mRNA transcription	10	1	1			1	1	1	1					1	1	1	1	1	1							20
GO:0006390	transcription from mitochondrial promoter	10					1	1			1	1							1	1							11
GO:0006352	DNA-templated transcription, initiation	8	6.71e-05	6	1	2	0.000482	5	0.000242	5	2.46e-10	8	1	1	0.0329	4	1	2	0.0141	4	1	1	0.000703	5	0.119	3	321
GO:0070897	DNA-templated transcriptional preinitiation complex assembly	9	1	1					1	1	0.000136	3			1	1			1	1			1	1			25
GO:0006367	transcription initiation from RNA polymerase II promoter	9	2.93e-05	6	1	2	0.0115	4	0.000121	5	9.44e-09	7	1	1	0.019	4	1	2	0.323	3	1	1	0.000352	5	0.0786	3	279
GO:0051123	RNA polymerase II transcriptional preinitiation complex assembly	10	1	1					1	1	0.000105	3			1	1			1	1			1	1			23
GO:0006391	transcription initiation from mitochondrial promoter	9					1	1			1	1							1	1							3
GO:0006353	DNA-templated transcription, termination	8	1	2	1	2	1	2	1	1	0.805	2			1	2	0.628	2	1	2			1	1	0.417	2	96
GO:0006369	termination of RNA polymerase II transcription	9	0.678	2	0.274	2	0.33	2	1	1	0.193	2			0.437	2	0.15	2	0.274	2			1	1	0.0997	2	47
GO:0006354	DNA-templated transcription, elongation	8	0.00237	4	1	1	1	2	0.0315	3	1	2	1	1	1	2			1	1			1	2	1	1	134
GO:0006368	transcription elongation from RNA polymerase II promoter	9	0.0477	3	1	1	1	2	0.997	2	0.789	2	1	1	1	2			1	1			1	2	1	1	95
GO:0019083	viral transcription	8	0.000207	5			1	1	0.00157	4	0.0683	3			1	2			1	1			0.18	3	1	1	194
GO:0071897	DNA biosynthetic process	7	1	1			1	1	1	1	1	1	1	1	1	1	1	1			1	2	1	1	1	1	153
GO:0055086	nucleobase-containing small molecule metabolic process	6																			1	1					715
GO:0006753	nucleoside phosphate metabolic process	7																			1	1					655
GO:0009117	nucleotide metabolic process	8																			1	1					648
GO:0009187	cyclic nucleotide metabolic process	9																			1	1					196
GO:0009259	ribonucleotide metabolic process	9																			1	1					520
GO:0006163	purine nucleotide metabolic process	9																			1	1					526
GO:0009150	purine ribonucleotide metabolic process	10																			1	1					505
GO:0046058	cAMP metabolic process	11																			1	1					152
GO:0042180	cellular ketone metabolic process	4																			1	1					272
GO:0044255	cellular lipid metabolic process	4	1	1							1	1			1	2	1	1	1	1	1	3	1	1	1	1	1066
GO:0006638	neutral lipid metabolic process	5																			1	1					163
GO:0046486	glycerolipid metabolic process	5	1	1							1	1			1	1			1	1	1	2			1	1	394
GO:0045017	glycerolipid biosynthetic process	6	1	1							1	1			1	1			1	1	1	1			1	1	278
GO:0006639	acylglycerol metabolic process	6																			1	1					162
GO:0006641	triglyceride metabolic process	7																			1	1					153
GO:0006644	phospholipid metabolic process	5	1	1							1	1			1	1			1	1	1	1			1	1	382
GO:0006650	glycerophospholipid metabolic process	6	1	1							1	1			1	1			1	1	1	1			1	1	273
GO:0046488	phosphatidylinositol metabolic process	7	1	1							1	1			1	1			1	1	1	1			1	1	151
GO:0008654	phospholipid biosynthetic process	6	1	1							1	1			1	1			1	1	1	1			1	1	243
GO:0046474	glycerophospholipid biosynthetic process	7	1	1							1	1			1	1			1	1	1	1			1	1	211
GO:0006661	phosphatidylinositol biosynthetic process	8	1	1							1	1			1	1			1	1	1	1			1	1	100
GO:0006413	translational initiation	4																	1	1							273
GO:0051716	cellular response to stimulus	3	0.0615	14	1	8	0.04	12	0.00826	12	0.00235	12	0.316	9	0.0275	13	1	7	0.00193	13	9.73e-07	14	0.0164	13	0.000527	11	7207
GO:0070887	cellular response to chemical stimulus	4	0.413	8	1	4	1	4	0.0136	8	0.00608	8	1	4	1	6	1	3	1	5	0.0015	8	0.0686	8	1	4	2852
GO:0071229	cellular response to acid chemical	5	1	1					1	1	1	1											1	2			184
GO:1901701	cellular response to oxygen-containing compound	5	0.868	5	1	1			1	3	0.88	4	1	1	1	3	1	1	1	2	1	3	0.265	5	1	2	1102
GO:1904632	cellular response to glucoside	6							0.601	1																	1
GO:1901699	cellular response to nitrogen compound	5	1	3	1	1			1	2	1	2	1	1	1	2	1	1	1	3	1	3	1	1	1	2	735
GO:0071466	cellular response to xenobiotic stimulus	5							1	1			1	1							1	1			1	1	196
GO:0006805	xenobiotic metabolic process	6							1	1			1	1							1	1			1	1	192
GO:0035690	cellular response to drug	5																	1	1							72
GO:0071310	cellular response to organic substance	5	0.752	7	1	3	1	3	0.378	6	0.0191	7	1	3	1	4	1	3	1	4	0.0781	6	0.0169	8	1	3	2347
GO:0097306	cellular response to alcohol	6	1	1					1	1	1	1			1	1			1	1	1	1	1	2	1	1	126
GO:0071363	cellular response to growth factor stimulus	6	1	3	1	1	1	2	1	2	1	3	1	1	1	1	1	1	1	1	1	3	1	3	1	1	927
GO:1990090	cellular response to nerve growth factor stimulus	7							1	1																	37
GO:1990416	cellular response to brain-derived neurotrophic factor stimulus	8							1	1																	5
GO:0071560	cellular response to transforming growth factor beta stimulus	7	1	2			1	1	1	1	1	2									1	2	1	2			246
GO:0044344	cellular response to fibroblast growth factor stimulus	7	1	1							1	1			1	1			1	1	1	1			1	1	340
GO:0071407	cellular response to organic cyclic compound	6	1	2					0.946	3	0.686	3			1	1			1	2	1	2	1	2	1	1	425
GO:0071359	cellular response to dsRNA	7							1	1									1	1							42
GO:0071345	cellular response to cytokine stimulus	6	1	1	1	1	1	1	1	2			1	1	1	1	1	1	1	1	1	1	1	3	1	1	760
GO:0071353	cellular response to interleukin-4	7																			1	1	1	1			27
GO:0071356	cellular response to tumor necrosis factor	7			1	1			1	1			1	1									1	1			262
GO:0071354	cellular response to interleukin-6	7	1	1			1	1	1	1															1	1	28
GO:0071347	cellular response to interleukin-1	7							1	1					1	1	1	1	1	1			1	1			90
GO:0071346	cellular response to interferon-gamma	7							1	1											1	1	1	1			136
GO:0071396	cellular response to lipid	6	1	1					1	3	0.729	3			1	1					1	1	1	3			434
GO:1904630	cellular response to diterpene	7							0.601	1																	1
GO:0071300	cellular response to retinoic acid	7	1	1					1	1	1	1											0.847	2			70
GO:0032870	cellular response to hormone stimulus	6	1	3	1	1			1	3	1	3	1	1	1	1	1	1	1	1	1	3	1	2	1	1	744
GO:0071371	cellular response to gonadotropin stimulus	7																					1	1			16
GO:0071372	cellular response to follicle-stimulating hormone stimulus	8																					1	1			8
GO:0071383	cellular response to steroid hormone stimulus	7							1	1	1	1									1	1	1	1			168
GO:0071384	cellular response to corticosteroid stimulus	8									1	1									1	1					63
GO:0071385	cellular response to glucocorticoid stimulus	9									1	1									1	1					59
GO:0071391	cellular response to estrogen stimulus	8																					1	1			42
GO:0071392	cellular response to estradiol stimulus	9																					1	1			31
GO:0071322	cellular response to carbohydrate stimulus	6	1	1					1	1													1	1			134
GO:0071326	cellular response to monosaccharide stimulus	7	1	1																			1	1			124
GO:0071331	cellular response to hexose stimulus	8	1	1																			1	1			122
GO:0071333	cellular response to glucose stimulus	9	1	1																			1	1			120
GO:0071417	cellular response to organonitrogen compound	6	1	3	1	1			1	2	1	2	1	1	1	2	1	1	1	2	1	3	1	1	1	2	680
GO:0071312	cellular response to alkaloid	7							1	1																	34
GO:0071316	cellular response to nicotine	8							1	1																	7
GO:1901653	cellular response to peptide	7	1	3	1	1			1	2	1	2	1	1	1	1	1	1	1	1	1	2	1	1	1	1	528
GO:0071375	cellular response to peptide hormone stimulus	8	1	3	1	1			1	2	1	2	1	1	1	1	1	1	1	1	1	2	1	1	1	1	510
GO:0032869	cellular response to insulin stimulus	9	1	1	1	1			1	1	1	1	1	1	1	1	1	1	1	1	1	2	1	1	1	1	410
GO:0071320	cellular response to cAMP	7	1	1							1	1															49
GO:0071681	cellular response to indole-3-methanol	7													1	1			1	1	1	1			1	1	5
GO:0071241	cellular response to inorganic substance	5	1	1	1	1	1	1	1	1					1	1					1	1					162
GO:0071248	cellular response to metal ion	6	1	1	1	1	1	1	1	1					1	1					1	1					140
GO:0071277	cellular response to calcium ion	7	1	1	1	1	1	1							1	1					1	1					50
GO:0071281	cellular response to iron ion	7							1	1																	10
GO:0071453	cellular response to oxygen levels	5							1	1																	156
GO:0036294	cellular response to decreased oxygen levels	6							1	1																	147
GO:0060326	cell chemotaxis	5	1	1							0.122	3			0.379	3			1	1	1	1			1	1	236
GO:0035766	cell chemotaxis to fibroblast growth factor	6	1	1							1	1			1	1			1	1	1	1			1	1	7
GO:0030595	leukocyte chemotaxis	6									1	1			1	1											182
GO:0002548	monocyte chemotaxis	7									1	1			1	1											58
GO:0002407	dendritic cell chemotaxis	7									1	1			1	1											22
GO:0035767	endothelial cell chemotaxis	6	1	1							0.0538	2			0.122	2			1	1	1	1			1	1	25
GO:0035768	endothelial cell chemotaxis to fibroblast growth factor	7	1	1							1	1			1	1			1	1	1	1			1	1	7
GO:0071216	cellular response to biotic stimulus	4							1	1	1	1			1	1											183
GO:0071219	cellular response to molecule of bacterial origin	5							1	1	1	1			1	1											165
GO:0071222	cellular response to lipopolysaccharide	6							1	1	1	1			1	1											158
GO:0071214	cellular response to abiotic stimulus	4			1	1			1	2			1	1	1	2	1	1	1	1			0.634	3			298
GO:0071478	cellular response to radiation	5							1	1					1	2	1	1	1	1			1	2			165
GO:0071479	cellular response to ionizing radiation	6													1	1							1	1			55
GO:0071480	cellular response to gamma radiation	7																					1	1			20
GO:0071482	cellular response to light stimulus	6							1	1					1	1	1	1	1	1			1	1			117
GO:0034644	cellular response to UV	7							1	1					1	1	1	1	1	1			1	1			69
GO:0071260	cellular response to mechanical stimulus	5							1	1																	82
GO:0033554	cellular response to stress	4	1	6	1	3	0.312	6	1	5	0.00604	7	1	3	0.00657	8	1	4	1	5	1	4	0.473	6	1	2	1968
GO:0034976	response to endoplasmic reticulum stress	5							1	2	1	1			1	1					1	1	1	1	1	1	259
GO:0036503	ERAD pathway	6							1	1																	84
GO:0006974	cellular response to DNA damage stimulus	5	0.211	5	1	1	0.0436	5	0.417	4	0.0133	5			0.00443	6	1	2	0.0284	5	1	3	0.94	4	1	1	811
GO:0000077	DNA damage checkpoint	6																			1	1	1	1			156
GO:0044783	G1 DNA damage checkpoint	7																			1	1	1	1			78
GO:0006281	DNA repair	6	1	3	1	1	0.13	4	1	2	0.0495	4			0.212	4	1	1	0.0917	4	0.722	3	1	2	1	1	519
GO:0006284	base-excision repair	7	0.83	2							0.236	2			0.535	2											52
GO:0006301	postreplication repair	7							1	1									1	1							61
GO:0019985	translesion synthesis	8							1	1																	49
GO:0006289	nucleotide-excision repair	7							1	1	1	1			1	1											116
GO:0006283	transcription-coupled nucleotide-excision repair	8							1	1																	73
GO:0006298	mismatch repair	7									1	1			1	1											38
GO:0006302	double-strand break repair	7	1	1	1	1	1	2			1	1			1	1	1	1	1	1	0.0636	3	1	1			227
GO:0051103	DNA ligation involved in DNA repair	7									0.0081	2			0.0184	2											10
GO:0000725	recombinational repair	7													1	1	1	1	1	1							155
GO:0000724	double-strand break repair via homologous recombination	8													1	1	1	1	1	1							155
GO:0071498	cellular response to fluid shear stress	5																					1	1			20
GO:0034599	cellular response to oxidative stress	5	1	1							1	1									1	1	1	1			229
GO:0036473	cell death in response to oxidative stress	6																			1	1	1	1			63
GO:0034614	cellular response to reactive oxygen species	6	1	1							1	1															133
GO:0070301	cellular response to hydrogen peroxide	7	1	1							1	1															77
GO:0034605	cellular response to heat	5							1	1																	113
GO:0071470	cellular response to osmotic stress	5			1	1							1	1									1	1			24
GO:0071474	cellular hyperosmotic response	6			1	1							1	1									1	1			8
GO:0035967	cellular response to topologically incorrect protein	5							1	1	1	1															141
GO:0034620	cellular response to unfolded protein	6							1	1	1	1															132
GO:0090398	cellular senescence	5	1	1											1	1					1	1	1	1			53
GO:0090402	oncogene-induced cell senescence	6	1	1											1	1											2
GO:0071456	cellular response to hypoxia	5							1	1																	140
GO:0031668	cellular response to extracellular stimulus	4	1	2					1	1	1	2	1	1	1	2	1	1			1	1	1	2			207
GO:0031669	cellular response to nutrient levels	5	1	2					1	1	1	2	1	1	1	2	1	1			1	1	1	2			177
GO:0031670	cellular response to nutrient	6	1	1					1	1	1	1											0.365	2			46
GO:0071295	cellular response to vitamin	7	1	1					1	1	1	1											0.187	2			33
GO:0071306	cellular response to vitamin E	8																					1	1			3
GO:0071305	cellular response to vitamin D	8	1	1					1	1	1	1											1	1			21
GO:0009267	cellular response to starvation	6	1	1							1	1	1	1	1	2	1	1			1	1					123
GO:0042149	cellular response to glucose starvation	7									1	1	1	1	0.177	2	1	1			1	1					30
GO:0048511	rhythmic process	2	0.1	4	1	1	1	2	1	2	1	2	1	2	1	3	0.00647	4	0.612	3	0.00507	4	0.0364	4	1	1	347
GO:0007623	circadian rhythm	3	1	2			1	1	1	2	1	2	1	1	0.277	3	0.0625	3	1	2	0.0519	3	0.234	3	1	1	212
GO:0007622	rhythmic behavior	3	1	1																	1	1					48
GO:0048512	circadian behavior	4	1	1																	1	1					47
GO:0045475	locomotor rhythm	5	1	1																	1	1					14
GO:0022414	reproductive process	2	1	2	1	2	1	1	1	2	1	2	1	1	1	4	1	3	1	1	1	3	1	2			1400
GO:0044703	multi-organism reproductive process	3	1	2	1	2			1	1	1	1	1	1	1	3	1	2	1	1	1	1	1	2			973
GO:0019953	sexual reproduction	4	1	1	1	2					1	1	1	1	1	3	1	2	1	1	1	1	1	2			787
GO:0007565	female pregnancy	4	1	1					1	1																	208
GO:0044702	single organism reproductive process	3	1	2	1	2	1	1	1	2	1	2	1	1	1	4	1	3	1	1	1	3	1	2			1257
GO:0022412	cellular process involved in reproduction in multicellular organism	4	1	1	1	1					1	1			1	1					1	1	1	1			274
GO:0051321	meiotic cell cycle	4			1	1	1	1	1	1	1	1									1	1					210
GO:1903046	meiotic cell cycle process	5			1	1	1	1			1	1									1	1					174
GO:0070192	chromosome organization involved in meiotic cell cycle	5			1	1															1	1					55
GO:0007126	meiotic nuclear division	5			1	1	1	1			1	1									1	1					166
GO:0007143	female meiotic division	6			1	1															1	1					28
GO:0007140	male meiosis	6			1	1															1	1					40
GO:0007127	meiosis I	6			1	1	1	1			1	1									1	1					90
GO:0007141	male meiosis I	7			1	1															1	1					18
GO:0007144	female meiosis I	7			1	1															1	1					7
GO:0007131	reciprocal meiotic recombination	7			1	1	1	1			1	1									1	1					40
GO:0045132	meiotic chromosome segregation	6			1	1															1	1					70
GO:0045143	homologous chromosome segregation	7			1	1															1	1					52
GO:0007129	synapsis	8			1	1															1	1					41
GO:0007130	synaptonemal complex assembly	9			1	1															1	1					20
GO:0009566	fertilization	4			1	1							1	1									1	1			168
GO:0003006	developmental process involved in reproduction	3	1	2	1	2			1	1	1	1	1	1	1	2	1	1			1	2	1	2			662
GO:0007548	sex differentiation	4			1	1					1	1	1	1	1	2	1	1					1	1			294
GO:0046661	male sex differentiation	5			1	1					1	1	1	1	1	1							1	1			166
GO:0045137	development of primary sexual characteristics	4			1	1					1	1	1	1	1	2	1	1					1	1			240
GO:0046546	development of primary male sexual characteristics	5			1	1					1	1	1	1	1	1							1	1			140
GO:0048608	reproductive structure development	4	1	1	1	1			1	1	1	1	1	1	1	2	1	1			1	1	1	1			456
GO:0001890	placenta development	5	1	1					1	1																	155
GO:0008406	gonad development	5			1	1					1	1	1	1	1	2	1	1					1	1			235
GO:0008584	male gonad development	6			1	1					1	1	1	1	1	1							1	1			140
GO:0030850	prostate gland development	5																			1	1					54
GO:0060525	prostate glandular acinus development	6																			1	1					12
GO:0060767	epithelial cell proliferation involved in prostate gland development	6																			1	1					11
GO:0001892	embryonic placenta development	4	1	1																							94
GO:0060742	epithelial cell differentiation involved in prostate gland development	4																			1	1					13
GO:0060528	secretory columnal luminar epithelial cell differentiation involved in prostate glandular acinus development	5																			1	1					4
GO:0048609	multicellular organismal reproductive process	3	1	2	1	2			1	1	1	1	1	1	1	3	1	2	1	1	1	2	1	2			799
GO:0042698	ovulation cycle	4																			1	1					122
GO:0044849	estrous cycle	5																			1	1					20
GO:0007276	gamete generation	4	1	1	1	2					1	1	1	1	1	3	1	2	1	1	1	1	1	2			630
GO:0007292	female gamete generation	5			1	1															1	1					111
GO:0048232	male gamete generation	5	1	1	1	2					1	1	1	1	1	2	1	1	1	1	1	1	1	2			502
GO:0007283	spermatogenesis	6	1	1	1	2					1	1	1	1	1	2	1	1	1	1	1	1	1	2			501
GO:0048515	spermatid differentiation	7	1	1	1	1					1	1			1	1					1	1	1	1			131
GO:0007281	germ cell development	5	1	1	1	1					1	1			1	1					1	1	1	1			224
GO:0048477	oogenesis	6			1	1															1	1					74
GO:0009994	oocyte differentiation	7			1	1															1	1					46
GO:0007286	spermatid development	6	1	1	1	1					1	1			1	1					1	1	1	1			125
GO:0007289	spermatid nucleus differentiation	7									1	1			1	1											20
GO:0048599	oocyte development	6			1	1															1	1					43
GO:0001556	oocyte maturation	7			1	1															1	1					24
GO:0060135	maternal process involved in female pregnancy	4							1	1																	64
GO:0001893	maternal placenta development	5							1	1																	33
GO:0060136	embryonic process involved in female pregnancy	4	1	1																							7
GO:0050789	regulation of biological process	2	3.72e-24	36	4.56e-16	25	1.54e-17	27	2.44e-15	24	7e-14	22	2.01e-12	20	9.81e-20	30	2.01e-12	20	4.56e-16	25	1.08e-11	19	5.07e-19	29	3.13e-10	17	10984
GO:0051239	regulation of multicellular organismal process	3	1	7	1	5	0.0199	8	2.06e-06	11	0.37	6	1	4	0.0054	9	1	4	0.861	6	1	5	0.0357	8	0.735	5	2603
GO:0044057	regulation of system process	4					1	1							1	1			1	2	1	1	1	1	1	2	524
GO:1903522	regulation of blood circulation	5													1	1			1	1	1	1			1	1	307
GO:0008016	regulation of heart contraction	6													1	1			1	1	1	1			1	1	230
GO:0002027	regulation of heart rate	7													1	1			1	1	1	1			1	1	89
GO:0061337	cardiac conduction	7													1	1			1	1	1	1			1	1	131
GO:0086091	regulation of heart rate by cardiac conduction	8													1	1			1	1	1	1			1	1	27
GO:0086065	cell communication involved in cardiac conduction	8													1	1			1	1	1	1			1	1	44
GO:0086069	bundle of His cell to Purkinje myocyte communication	9													1	1			1	1	1	1			1	1	11
GO:0086073	bundle of His cell-Purkinje myocyte adhesion involved in cell communication	10													1	1			1	1	1	1			1	1	6
GO:0090257	regulation of muscle system process	5					1	1							1	1			1	2	1	1	1	1	1	2	197
GO:0006937	regulation of muscle contraction	6													1	1			1	1	1	1	1	1	1	1	148
GO:0006942	regulation of striated muscle contraction	7													1	1			1	1	1	1			1	1	76
GO:0055117	regulation of cardiac muscle contraction	8													1	1			1	1	1	1			1	1	63
GO:0006940	regulation of smooth muscle contraction	7																					1	1			63
GO:1901077	regulation of relaxation of muscle	6																					1	1			10
GO:1901080	regulation of relaxation of smooth muscle	7																					0.773	1			1
GO:0031644	regulation of neurological system process	5																					1	1			68
GO:0044058	regulation of digestive system process	5																					1	1			38
GO:0043134	regulation of hindgut contraction	6																					1	1			3
GO:0001817	regulation of cytokine production	4							1	3	1	2			1	3					1	1	1	1			584
GO:1903555	regulation of tumor necrosis factor superfamily cytokine production	5									1	1			1	1											104
GO:0032680	regulation of tumor necrosis factor production	6									1	1			1	1											101
GO:0032653	regulation of interleukin-10 production	5									1	1			1	1											41
GO:0032649	regulation of interferon-gamma production	5									1	1			1	1											94
GO:0032675	regulation of interleukin-6 production	5									1	1			1	1											104
GO:0032655	regulation of interleukin-12 production	5							1	1	1	1			1	1											54
GO:0032652	regulation of interleukin-1 production	5									1	1			0.643	2					1	1	1	1			57
GO:0032651	regulation of interleukin-1 beta production	6									1	1			0.437	2					1	1	1	1			47
GO:0032479	regulation of type I interferon production	5							0.0256	3	1	2			0.0578	3											125
GO:0032647	regulation of interferon-alpha production	6									1	1			1	1											20
GO:0032648	regulation of interferon-beta production	6									0.185	2			0.418	2											46
GO:0034103	regulation of tissue remodeling	4																			1	1	1	1			66
GO:0030278	regulation of ossification	4	1	2			1	1	1	2	1	1			1	2	1	1	1	2	1	1			1	1	185
GO:0032879	regulation of localization	3	1	4	1	4	1	2	1	1	1	4	1	2	1	5	1	1	1	3	0.0913	6	1	5	1	3	2414
GO:0051049	regulation of transport	4	1	1	1	2	1	2	1	1	1	2	1	1	1	4			1	2	1	4	1	4	1	2	1776
GO:0090087	regulation of peptide transport	5													1	1									1	1	281
GO:0032239	regulation of nucleobase-containing compound transport	5	1	1	1	1	1	1							1	1											11
GO:0032409	regulation of transporter activity	5			1	1							1	1					1	1	1	1	1	1			201
GO:0051046	regulation of secretion	5									1	1			1	2					1	1	1	1	1	1	701
GO:0002791	regulation of peptide secretion	6													1	1									1	1	234
GO:0043269	regulation of ion transport	5			1	1							1	1							1	2	1	3			598
GO:0010959	regulation of metal ion transport	6			1	1							1	1							1	2	0.906	3			337
GO:0002028	regulation of sodium ion transport	7			1	1							1	1							1	1	1	1			81
GO:0051924	regulation of calcium ion transport	7																			1	1	1	2			216
GO:0010155	regulation of proton transport	6			1	1							1	1							1	1	1	1			15
GO:0032368	regulation of lipid transport	5							1	1																	97
GO:0032371	regulation of sterol transport	6							1	1																	39
GO:0032374	regulation of cholesterol transport	7							1	1																	39
GO:0032880	regulation of protein localization	4					1	1			1	2			1	3			1	1	1	3	1	2	1	2	974
GO:0070201	regulation of establishment of protein localization	5					1	1			1	2			1	3			1	1	1	3	1	2	1	2	833
GO:0051223	regulation of protein transport	6					1	1			1	2			1	3			1	1	1	3	1	2	1	2	760
GO:1904589	regulation of protein import	7													1	1			1	1	1	1	1	1	1	1	183
GO:0010883	regulation of lipid storage	4							1	1																	40
GO:2000241	regulation of reproductive process	3																			1	1					132
GO:0048583	regulation of response to stimulus	3	0.0854	10	1	6	0.0355	9	0.011	9	1	6	1	6	0.624	8	1	3	0.138	8	0.0113	8	0.00874	10	0.048	7	3740
GO:0002831	regulation of response to biotic stimulus	4									1	1			1	1					1	1	1	1			239
GO:0002834	regulation of response to tumor cell	5									1	1			1	1											13
GO:1901419	regulation of response to alcohol	4	1	1					1	1	1	1											1	1			8
GO:0032101	regulation of response to external stimulus	4	1	4			1	2	1	2	1	3			1	2			1	1	1	3	1	2	1	2	895
GO:0032104	regulation of response to extracellular stimulus	5	1	1			1	1	1	1	1	1											1	1			126
GO:0032107	regulation of response to nutrient levels	6	1	1			1	1	1	1	1	1											1	1			126
GO:0080134	regulation of response to stress	4	0.383	6	1	2	1	4	1	3	1	4	1	2	0.123	6	1	2	1	3	1	3	1	3	1	2	1463
GO:0031347	regulation of defense response	5	1	2	1	1	1	2	1	2	1	2	1	1	1	3	1	1			1	2	1	1	1	1	799
GO:1903034	regulation of response to wounding	5	1	3			1	1	1	1	1	2			1	2			1	1	1	2			1	2	409
GO:0061041	regulation of wound healing	6	1	1							1	2			1	2			1	1	1	1			1	1	128
GO:0050727	regulation of inflammatory response	6	1	2			1	1	1	1											1	1			1	1	291
GO:0002673	regulation of acute inflammatory response	7	1	1			1	1																	1	1	72
GO:0047484	regulation of response to osmotic stress	5			1	1							1	1									1	1			8
GO:0043502	regulation of muscle adaptation	4					1	1											1	1					1	1	65
GO:0014733	regulation of skeletal muscle adaptation	5					1	1											1	1					1	1	15
GO:0014886	transition between slow and fast fiber	6					1	1											1	1					0.702	1	2
GO:0050795	regulation of behavior	4	1	1							1	2			1	2			1	1	1	1			1	1	251
GO:2001023	regulation of response to drug	4																	1	1							6
GO:0043900	regulation of multi-organism process	3	0.000803	6			1	2	4.93e-05	6	1	3			0.17	4	1	1	1	2	1	1	0.139	4	1	1	490
GO:0043903	regulation of symbiosis, encompassing mutualism through parasitism	4	7.91e-06	6			1	2	4.64e-07	6	0.105	3			0.00801	4	1	1	1	2	1	1	0.00651	4	1	1	224
GO:0044087	regulation of cellular component biogenesis	3	1	1	1	1	1	1	1	1	1	3			1	1			1	3			1	1	1	1	732
GO:0032844	regulation of homeostatic process	3	1	3					1	1	1	2			1	2			1	1	1	2	1	2	1	1	440
GO:2000021	regulation of ion homeostasis	4	1	1							1	1			1	1			1	1	1	2	1	1	1	1	193
GO:0040012	regulation of locomotion	3	1	3	1	2			1	1	1	3	1	1	1	2	1	1	1	1	1	2	1	2	1	1	766
GO:0050920	regulation of chemotaxis	4	1	1							1	2			1	2			1	1	1	1			1	1	185
GO:0023051	regulation of signaling	3	1	6	1	4	1	5	0.00197	9	1	5	1	5	1	6	1	2	1	6	0.0308	7	0.00133	10	0.0123	7	3034
GO:0040008	regulation of growth	3	1	3	1	1	1	2			1	1	1	2	1	2	1	1	1	1	1	2	0.001	6	1	2	658
GO:0002682	regulation of immune system process	3	1	4	1	2	1	3	1	3	1	3	1	1	1	5	1	1	1	1	1	2	1	2	1	2	1562
GO:0002697	regulation of immune effector process	4	1	2	1	1	1	2			1	1			1	2					1	1	1	1	1	1	422
GO:0002703	regulation of leukocyte mediated immunity	5	1	1	1	1	1	1			1	1			1	2											152
GO:0002706	regulation of lymphocyte mediated immunity	6	1	1	1	1	1	1			1	1			1	2											113
GO:0002700	regulation of production of molecular mediator of immune response	5	1	1	1	1	1	1							1	1											105
GO:0002637	regulation of immunoglobulin production	6	1	1	1	1	1	1							1	1											48
GO:0050688	regulation of defense response to virus	5																			1	1	1	1			192
GO:0050691	regulation of defense response to virus by host	6																			1	1	1	1			136
GO:0002230	positive regulation of defense response to virus by host	7																			1	1	1	1			125
GO:0050776	regulation of immune response	4	1	3	1	2	1	3	1	2	1	3	1	1	0.238	5	1	1	1	1	1	1	1	1	1	2	1024
GO:0002837	regulation of immune response to tumor cell	5									1	1			1	1											13
GO:0002819	regulation of adaptive immune response	5	1	1	1	1	1	1			1	1			1	2											122
GO:0002822	regulation of adaptive immune response based on somatic recombination of immune receptors built from immunoglobulin superfamily domains	6	1	1	1	1	1	1			1	1			1	2											112
GO:0002709	regulation of T cell mediated immunity	7									1	1			1	1											51
GO:0002840	regulation of T cell mediated immune response to tumor cell	8									1	1			1	1											3
GO:0002712	regulation of B cell mediated immunity	7	1	1	1	1	1	1							1	1											43
GO:0002889	regulation of immunoglobulin mediated immune response	8	1	1	1	1	1	1							1	1											42
GO:0002920	regulation of humoral immune response	5	1	1			1	1																	1	1	51
GO:0045088	regulation of innate immune response	5			1	1	1	1	1	2	1	2	1	1	1	3	1	1									405
GO:0050793	regulation of developmental process	3	0.0627	8	0.00269	8	0.000414	9	0.00012	9	0.139	6	0.00533	7	0.0137	8	0.797	5	1	5	0.0511	6	0.000829	9	1	4	2175
GO:1901861	regulation of muscle tissue development	4	0.0681	3	1	1	1	2	1	2	1	1	0.779	2	1	2	1	1	0.0188	3	0.684	2	0.0306	3	0.518	2	107
GO:0022603	regulation of anatomical structure morphogenesis	4	1	1	1	2	1	3	1	3	0.454	4	1	2	1	4	1	1	1	2	1	3	1	3	1	3	924
GO:2000026	regulation of multicellular organismal development	4	0.686	6	1	4	0.00911	7	0.000208	8	0.028	6	1	3	0.0208	7	1	3	1	4	1	4	0.171	6	1	4	1631
GO:0090183	regulation of kidney development	5													1	1	1	1					1	1			56
GO:0061217	regulation of mesonephros development	6													1	1	1	1									27
GO:0072215	regulation of metanephros development	6													1	1	1	1					1	1			23
GO:0048634	regulation of muscle organ development	5	0.0681	3	1	1	1	2	1	2	1	1	0.779	2	1	2	1	1	0.0188	3	0.684	2	0.0306	3	0.518	2	107
GO:0016202	regulation of striated muscle tissue development	6	0.0644	3	1	1	1	2	1	2	1	1	0.75	2	1	2	1	1	0.0177	3	0.658	2	0.029	3	0.499	2	105
GO:0048641	regulation of skeletal muscle tissue development	7	0.767	2	1	1	0.374	2	0.277	2			0.17	2	1	1	1	1	0.31	2	1	1	0.432	2	1	1	50
GO:0055024	regulation of cardiac muscle tissue development	7	1	1							1	1			1	1			1	1	1	1	1	1	1	1	52
GO:0070167	regulation of biomineral tissue development	5							1	1																	78
GO:0030500	regulation of bone mineralization	6							1	1																	70
GO:0051960	regulation of nervous system development	5	1	2	1	2	1	2	1	3	0.218	4	1	1	1	2	1	1	1	1	1	1	1	2	1	2	762
GO:1901342	regulation of vasculature development	5	1	1			1	1	1	1	1	2			0.365	3			1	2	1	2	1	1	1	2	233
GO:0045765	regulation of angiogenesis	6	1	1			1	1	1	1	1	2			0.281	3			1	2	1	2	1	1	1	2	213
GO:1903670	regulation of sprouting angiogenesis	7	1	1							0.0583	2			0.132	2			1	1	1	1			1	1	26
GO:0002643	regulation of tolerance induction	5									1	1			1	1											19
GO:2000027	regulation of organ morphogenesis	5	1	1					1	1	1	1	1	1	1	2	1	1	1	1	1	2	1	2	1	1	174
GO:1903519	regulation of mammary gland involution	6																			1	1	1	1			4
GO:2001074	regulation of metanephric ureteric bud development	6													1	1	0.893	1									2
GO:0042481	regulation of odontogenesis	6							1	1																	29
GO:0070170	regulation of tooth mineralization	7							1	1																	9
GO:0003156	regulation of organ formation	6	1	1							1	1			1	1			1	1	1	1			1	1	36
GO:2000826	regulation of heart morphogenesis	6											1	1									1	1			26
GO:1903706	regulation of hemopoiesis	5	1	1					1	1	1	2			1	2											327
GO:0048638	regulation of developmental growth	4	1	1	1	1					1	1	1	2	1	2	1	1	1	1	1	1	0.024	4	1	1	312
GO:0040014	regulation of multicellular organism growth	5																					1	1			78
GO:0046620	regulation of organ growth	5	1	1	1	1					1	1	1	1	1	2	1	1	1	1	1	1	1	2	1	1	80
GO:0060420	regulation of heart growth	6	1	1							1	1			0.4	2	1	1	1	1	1	1			1	1	45
GO:0055021	regulation of cardiac muscle tissue growth	7	1	1							1	1			1	1			1	1	1	1			1	1	39
GO:0048631	regulation of skeletal muscle tissue growth	5											1	1									1	1			6
GO:0019222	regulation of metabolic process	3	1.17e-31	36	2.84e-21	25	3.68e-23	27	2.45e-20	24	1.84e-18	22	1.38e-16	20	5.54e-26	30	1.38e-16	20	2.84e-21	25	1.2e-15	19	4.62e-25	29	9.06e-14	17	6805
GO:0080090	regulation of primary metabolic process	4	6.08e-34	36	7.37e-23	25	7.13e-25	27	7.38e-22	24	7.41e-20	22	7.46e-18	20	6.91e-28	30	7.46e-18	20	7.37e-23	25	7.5e-17	19	6.68e-27	29	7.58e-15	17	5882
GO:0006109	regulation of carbohydrate metabolic process	5							1	1																	176
GO:0019216	regulation of lipid metabolic process	5	1	1	1	1			1	1	1	1	1	1	1	1	1	1	1	1	1	2	1	1	1	1	299
GO:0019218	regulation of steroid metabolic process	6							1	1																	83
GO:0009894	regulation of catabolic process	4	1	1			1	2			1	1			1	3					1	1	1	1	1	1	694
GO:0009889	regulation of biosynthetic process	4	6.91e-39	36	2.74e-26	25	1.41e-28	27	3.76e-25	24	7.12e-23	22	1.35e-20	20	5.27e-32	30	1.35e-20	20	2.74e-26	25	1.86e-19	19	6.99e-31	29	3.54e-17	17	4292
GO:1902930	regulation of alcohol biosynthetic process	5							1	1																	47
GO:0043255	regulation of carbohydrate biosynthetic process	5							1	1																	88
GO:0046890	regulation of lipid biosynthetic process	5							1	1																	135
GO:0050810	regulation of steroid biosynthetic process	6							1	1																	53
GO:0060255	regulation of macromolecule metabolic process	4	6.55e-34	36	7.75e-23	25	7.54e-25	27	7.75e-22	24	7.75e-20	22	7.77e-18	20	7.35e-28	30	7.77e-18	20	7.75e-23	25	7.79e-17	19	7.09e-27	29	7.84e-15	17	5894
GO:0032881	regulation of polysaccharide metabolic process	5							1	1																	45
GO:0010556	regulation of macromolecule biosynthetic process	5	9.36e-40	36	6.84e-27	25	3.14e-29	27	9.94e-26	24	2.1e-23	22	4.45e-21	20	9.97e-33	30	4.45e-21	20	6.84e-27	25	6.49e-20	19	1.4e-31	29	1.38e-17	17	4061
GO:0032885	regulation of polysaccharide biosynthetic process	6							1	1																	39
GO:0045343	regulation of MHC class I biosynthetic process	6																			1	1	1	1			7
GO:0010468	regulation of gene expression	5	4.49e-36	35	1.27e-17	21	1.07e-23	25	1.46e-22	23	8.65e-23	22	4.11e-14	17	2.7e-29	29	1.61e-20	20	3.42e-26	25	9.83e-10	14	6.29e-26	27	9.15e-15	16	4330
GO:0040029	regulation of gene expression, epigenetic	6	5.26e-05	6	0.432	3	1	1	0.37	3	0.267	3	0.189	3	0.826	3	1	1	1	1	1	2	1	1			308
GO:0006306	DNA methylation	7	0.0393	3	1	1	1	1	1	1	1	1	1	1					1	1							89
GO:0032776	DNA methylation on cytosine	8					1	1																			36
GO:0080111	DNA demethylation	7	1	1							1	1															17
GO:0010608	posttranscriptional regulation of gene expression	6	1	1	1	3					1	2	0.0186	4	1	2	1	2	1	1	1	1	0.00384	5	1	2	454
GO:0043487	regulation of RNA stability	7	1	1	1	2					1	2	1	2	1	2	1	2					0.0728	3	0.921	2	143
GO:0043489	RNA stabilization	8			0.151	2					1	1	0.0829	2	0.241	2	0.0829	2					0.00103	3	0.055	2	35
GO:0043488	regulation of mRNA stability	8	1	1	1	2					1	2	1	2	1	2	1	2					0.0669	3	0.871	2	139
GO:0048255	mRNA stabilization	9			0.143	2					1	1	0.0782	2	0.228	2	0.0782	2					0.000946	3	0.0518	2	34
GO:0070934	CRD-mediated mRNA stabilization	10			1	1							1	1			1	1					1	1			5
GO:0070935	3'-UTR-mediated mRNA stabilization	10			1	1							1	1	1	1							1	1	1	1	14
GO:0032922	circadian regulation of gene expression	6	1	1							1	1	1	1	1	1	1	1	1	1	0.00123	3	0.643	2			61
GO:0051246	regulation of protein metabolic process	5	1	7	1	4	1	3	1	4	1	4	1	3	1	6			1	3	1	5	0.332	7	1	3	2653
GO:2000257	regulation of protein activation cascade	6	1	1			1	1																	1	1	31
GO:1903317	regulation of protein maturation	6	1	1			1	1																	1	1	80
GO:0030162	regulation of proteolysis	6	1	1			1	1			1	1			1	3					1	1	1	2	1	1	727
GO:0070613	regulation of protein processing	7	1	1			1	1																	1	1	79
GO:0042176	regulation of protein catabolic process	6	1	1			1	1							1	1					1	1	1	1	1	1	404
GO:0071514	genetic imprinting	5	1	1																							27
GO:0006349	regulation of gene expression by genetic imprinting	6	1	1																							17
GO:0051171	regulation of nitrogen compound metabolic process	4	1.09e-38	36	3.75e-26	25	1.97e-28	27	5.08e-25	24	9.38e-23	22	1.73e-20	20	7.68e-32	30	1.73e-20	20	3.75e-26	25	2.36e-19	19	1.01e-30	29	4.38e-17	17	4346
GO:1900125	regulation of hyaluronan biosynthetic process	5							1	1																	8
GO:0050790	regulation of catalytic activity	4	1	2			1	2	1	3	1	5	1	1	1	6			1	2	1	4	1	3	1	2	2378
GO:0051336	regulation of hydrolase activity	5	1	1			1	1	1	1	1	3	1	1	1	4			1	2	1	3	1	2	1	2	1286
GO:0060191	regulation of lipase activity	6	1	1							1	1			1	1			1	1	1	1			1	1	116
GO:0010517	regulation of phospholipase activity	7	1	1							1	1			1	1			1	1	1	1			1	1	96
GO:1900274	regulation of phospholipase C activity	8	1	1							1	1			1	1			1	1	1	1			1	1	70
GO:0051342	regulation of cyclic-nucleotide phosphodiesterase activity	6							1	1			1	1							1	1			1	1	9
GO:0043462	regulation of ATPase activity	6					1	1																			58
GO:0052547	regulation of peptidase activity	6									1	1			1	2					1	1	1	2			400
GO:0052548	regulation of endopeptidase activity	7									1	1			1	2					1	1	1	2			379
GO:2000116	regulation of cysteine-type endopeptidase activity	8									1	1			1	2					1	1	1	2			218
GO:0051340	regulation of ligase activity	5									1	1			1	1					1	1					140
GO:0010911	regulation of isomerase activity	5					1	1																			5
GO:2000371	regulation of DNA topoisomerase (ATP-hydrolyzing) activity	6					1	1																			4
GO:0051338	regulation of transferase activity	5	1	1							1	2			1	2			1	2	1	3	1	1	1	1	1058
GO:0051341	regulation of oxidoreductase activity	5							1	1																	91
GO:0032768	regulation of monooxygenase activity	6							1	1																	60
GO:0030656	regulation of vitamin metabolic process	4							1	1																	13
GO:0050794	regulation of cellular process	3	5.44e-25	36	1.2e-16	25	3.66e-18	27	6.78e-16	24	2.16e-14	22	6.93e-13	20	1.98e-20	30	6.93e-13	20	1.2e-16	25	3.93e-12	19	1.08e-19	29	1.26e-10	17	10414
GO:0034762	regulation of transmembrane transport	4			1	1							1	1							1	1	1	2			436
GO:0022898	regulation of transmembrane transporter activity	5			1	1							1	1							1	1	1	1			186
GO:0034765	regulation of ion transmembrane transport	5			1	1							1	1							1	1	1	2			419
GO:1904062	regulation of cation transmembrane transport	6			1	1							1	1							1	1	1	1			213
GO:1902305	regulation of sodium ion transmembrane transport	7			1	1							1	1							1	1	1	1			50
GO:0032412	regulation of ion transmembrane transporter activity	6			1	1							1	1							1	1	1	1			181
GO:2000649	regulation of sodium ion transmembrane transporter activity	7			1	1							1	1							1	1	1	1			40
GO:0032415	regulation of sodium:proton antiporter activity	8			1	1							1	1							1	1	1	1			6
GO:0090279	regulation of calcium ion import	6																					1	1			107
GO:0090342	regulation of cell aging	4	1	1											1	1											33
GO:0080135	regulation of cellular response to stress	4	1	3	1	1	1	2	1	2	1	2	1	1	1	3	1	1	1	2	1	1	1	3			650
GO:2001020	regulation of response to DNA damage stimulus	5	1	2			1	1	1	1	1	2			1	2	1	1	1	1	1	1	1	1			149
GO:1900034	regulation of cellular response to heat	5							1	1																	77
GO:2000772	regulation of cellular senescence	5	1	1											1	1											26
GO:0042127	regulation of cell proliferation	4	1	5	1	3	1	2	1	1	1	3	1	4	1	5	1	3	0.594	5	0.124	5	0.011	7	1	3	1550
GO:0014857	regulation of skeletal muscle cell proliferation	5	1	1							1	1			1	1			1	1	1	1			1	1	12
GO:0014842	regulation of skeletal muscle satellite cell proliferation	6	1	1							1	1			1	1			1	1	1	1			1	1	10
GO:0014843	growth factor dependent regulation of skeletal muscle satellite cell proliferation	7	1	1							0.519	1			0.855	1			0.646	1	0.413	1			0.351	1	1
GO:0070663	regulation of leukocyte proliferation	5									1	1			1	1							1	1			208
GO:0032944	regulation of mononuclear cell proliferation	6									1	1			1	1							1	1			201
GO:2000136	regulation of cell proliferation involved in heart morphogenesis	5											1	1									1	1			15
GO:2000177	regulation of neural precursor cell proliferation	5	1	1							1	1			1	1			1	1	1	1			1	1	83
GO:0021936	regulation of cerebellar granule cell precursor proliferation	6	1	1							1	1			1	1			1	1	1	1			1	1	13
GO:0050678	regulation of epithelial cell proliferation	5	1	1							1	2			1	2			1	1	1	2	1	1	1	1	291
GO:0001936	regulation of endothelial cell proliferation	6	1	1							0.805	2			1	2			1	1	1	1			1	1	96
GO:0010837	regulation of keratinocyte proliferation	6																					1	1			28
GO:0060768	regulation of epithelial cell proliferation involved in prostate gland development	6																			1	1					10
GO:0072091	regulation of stem cell proliferation	5	1	1	1	1	1	1			1	1	1	1	1	1	1	1	1	1			1	2			101
GO:0048145	regulation of fibroblast proliferation	5																			1	1	1	1			87
GO:0048660	regulation of smooth muscle cell proliferation	5	1	1							1	1			1	1			1	1	1	1			1	1	101
GO:0060043	regulation of cardiac muscle cell proliferation	5	1	1							1	1			1	1			1	1	1	1			1	1	30
GO:0030155	regulation of cell adhesion	4	1	1	1	1			1	1	1	1	1	1	1	1					1	2	1	3			645
GO:0010810	regulation of cell-substrate adhesion	5			1	1							1	1							1	1	1	1			178
GO:0022407	regulation of cell-cell adhesion	5									1	1			1	1							1	1			392
GO:1903037	regulation of leukocyte cell-cell adhesion	6									1	1			1	1							1	1			305
GO:0034110	regulation of homotypic cell-cell adhesion	6									1	1			1	1							1	1			314
GO:0051128	regulation of cellular component organization	4	0.519	7	0.356	6	0.00595	8	1	3	0.0128	7	1	2	1	4	1	1	1	4	1	3	0.87	6	1	3	2207
GO:0033043	regulation of organelle organization	5	1	4	1	2	1	3	1	1	1	2			1	3			1	3	1	2	1	4	1	1	1083
GO:0010821	regulation of mitochondrion organization	6					1	1			1	1									1	1					213
GO:0033044	regulation of chromosome organization	6	0.05	4	1	2	1	2	1	1	1	1			0.693	3			1	1	1	1	0.586	3			290
GO:1902275	regulation of chromatin organization	7	0.00392	4	1	2	1	2	1	1	1	1			1	2			1	1	1	1	0.0873	3			152
GO:1903308	regulation of chromatin modification	8	0.00325	4	1	2	1	2	1	1	1	1			1	2			1	1	1	1	0.0759	3			145
GO:0051493	regulation of cytoskeleton organization	6																	1	2			1	1	1	1	428
GO:1902115	regulation of organelle assembly	6																	1	2			1	1	1	1	114
GO:0031344	regulation of cell projection organization	5			1	3	1	3	1	1	1	1	1	1			1	1							1	1	528
GO:0032530	regulation of microvillus organization	6			1	1	1	1																			11
GO:0060491	regulation of cell projection assembly	6			1	1	1	1																			129
GO:0032534	regulation of microvillus assembly	7			1	1	1	1																			7
GO:0001558	regulation of cell growth	5	1	2			1	1													1	1	1	2	1	1	395
GO:0043254	regulation of protein complex assembly	5	1	1					1	1	0.447	3			1	1			1	1							367
GO:0022604	regulation of cell morphogenesis	5			1	2	1	2	1	1	1	2	1	1							1	1	1	1	1	1	516
GO:0051302	regulation of cell division	4	1	1	1	1					1	1	1	1	1	2	1	1	1	1	1	1	1	1	1	1	317
GO:0051783	regulation of nuclear division	5													1	1											172
GO:0032970	regulation of actin filament-based process	4													1	1			1	1	1	1			1	1	318
GO:0051983	regulation of chromosome segregation	4	1	1											1	1											91
GO:0010646	regulation of cell communication	4	1	6	1	4	1	6	0.00205	9	1	5	1	5	1	6	1	2	1	6	0.0317	7	0.00138	10	0.0127	7	3048
GO:0050804	modulation of synaptic transmission	5																	1	1							287
GO:0048167	regulation of synaptic plasticity	6																	1	1							146
GO:0048168	regulation of neuronal synaptic plasticity	7																	1	1							49
GO:0048172	regulation of short-term neuronal synaptic plasticity	8																	1	1							14
GO:0051969	regulation of transmission of nerve impulse	5																					1	1			13
GO:0060341	regulation of cellular localization	4	1	1	1	1	1	2			1	2			1	4			1	1	1	3	1	2	1	2	1270
GO:2000197	regulation of ribonucleoprotein complex localization	5	1	1	1	1	1	1							1	1											4
GO:1903530	regulation of secretion by cell	5									1	1			1	2					1	1	1	1	1	1	643
GO:0050708	regulation of protein secretion	6									1	1			1	2					1	1	1	1	1	1	408
GO:0050707	regulation of cytokine secretion	7									1	1			1	1					1	1	1	1			147
GO:0050704	regulation of interleukin-1 secretion	8									1	1			1	1					1	1	1	1			31
GO:0050706	regulation of interleukin-1 beta secretion	9									1	1			1	1					1	1	1	1			28
GO:0046883	regulation of hormone secretion	6													1	1									1	1	280
GO:0090276	regulation of peptide hormone secretion	7													1	1									1	1	229
GO:0050796	regulation of insulin secretion	8													1	1									1	1	198
GO:0032386	regulation of intracellular transport	5	1	1	1	1	1	2			1	1			1	2			1	1	1	3	1	2	1	1	618
GO:1903649	regulation of cytoplasmic transport	6	1	1	1	1	1	2			1	1			1	2			1	1	0.502	3	1	2	1	1	458
GO:0046822	regulation of nucleocytoplasmic transport	7	1	1	1	1	1	1							1	2			1	1	1	1	1	1	1	1	217
GO:0046831	regulation of RNA export from nucleus	8	1	1	1	1	1	1							1	1											9
GO:0010793	regulation of mRNA export from nucleus	9	1	1	1	1	1	1							1	1											4
GO:0010522	regulation of calcium ion transport into cytosol	7																			1	1	1	1			93
GO:1903827	regulation of cellular protein localization	5					1	1			1	1			1	1			1	1	1	2	1	1	1	1	549
GO:1903747	regulation of establishment of protein localization to mitochondrion	6					1	1			1	1									1	1					125
GO:1900180	regulation of protein localization to nucleus	6													1	1			1	1	1	1	1	1	1	1	215
GO:0033157	regulation of intracellular protein transport	6					1	1			1	1			1	1			1	1	1	2	1	1	1	1	381
GO:1903533	regulation of protein targeting	7					1	1			1	1			1	1			1	1	1	2	1	1	1	1	307
GO:0042306	regulation of protein import into nucleus	8													1	1			1	1	1	1	1	1	1	1	179
GO:0042990	regulation of transcription factor import into nucleus	9																					1	1			97
GO:1903214	regulation of protein targeting to mitochondrion	8					1	1			1	1									1	1					98
GO:0031323	regulation of cellular metabolic process	4	1e-33	36	1.04e-22	25	1.04e-24	27	1.03e-21	24	1.01e-19	22	9.85e-18	20	1.05e-27	30	9.85e-18	20	1.04e-22	25	9.76e-17	19	9.99e-27	29	9.59e-15	17	5964
GO:0042762	regulation of sulfur metabolic process	5	1	1																							20
GO:1903018	regulation of glycoprotein metabolic process	5																					1	1			40
GO:0034248	regulation of cellular amide metabolic process	5			1	2							0.284	3					1	1	1	1	1	3			354
GO:0031329	regulation of cellular catabolic process	5					1	1			1	1			1	3					1	1	1	1			584
GO:0010506	regulation of autophagy	6					1	1			1	1			1	2											198
GO:0016241	regulation of macroautophagy	7					1	1																			101
GO:1903146	regulation of mitophagy	8					1	1																			40
GO:0031326	regulation of cellular biosynthetic process	5	4.76e-39	36	2.11e-26	25	1.06e-28	27	2.94e-25	24	5.67e-23	22	1.1e-20	20	3.86e-32	30	1.1e-20	20	2.11e-26	25	1.53e-19	19	5.18e-31	29	2.97e-17	17	4248
GO:1904826	regulation of hydrogen sulfide biosynthetic process	6	1	1																							1
GO:2000112	regulation of cellular macromolecule biosynthetic process	6	4.49e-35	34	1.14e-16	20	1.3e-22	24	2.92e-21	22	3.6e-21	21	8.73e-15	17	3.91e-28	28	7.34e-19	19	1.23e-24	24	2.79e-10	14	6.84e-25	26	2.43e-13	15	3949
GO:0046984	regulation of hemoglobin biosynthetic process	7	1	1					1	1																	5
GO:0010559	regulation of glycoprotein biosynthetic process	7																					1	1			35
GO:0042984	regulation of amyloid precursor protein biosynthetic process	8																					1	1			7
GO:0060556	regulation of vitamin D biosynthetic process	6							1	1																	9
GO:0060558	regulation of calcidiol 1-monooxygenase activity	7							1	1																	7
GO:0042035	regulation of cytokine biosynthetic process	6							1	1																	101
GO:0045075	regulation of interleukin-12 biosynthetic process	7							1	1																	10
GO:0019219	regulation of nucleobase-containing compound metabolic process	5	8.18e-40	36	6.23e-27	25	2.84e-29	27	9.09e-26	24	1.94e-23	22	4.14e-21	20	8.92e-33	30	4.14e-21	20	6.23e-27	25	6.05e-20	19	1.26e-31	29	1.3e-17	17	4046
GO:0032069	regulation of nuclease activity	6									0.0454	2			0.103	2			1	1							23
GO:0051052	regulation of DNA metabolic process	6	1	2	1	2	1	2	1	1	1	2	1	1	1	2	1	1	1	1	1	1	1	1			341
GO:0051105	regulation of DNA ligation	7									1	1			1	1											5
GO:0032070	regulation of deoxyribonuclease activity	7									1	1			1	1			1	1							8
GO:0032071	regulation of endodeoxyribonuclease activity	8									1	1			1	1			1	1							7
GO:0032072	regulation of restriction endodeoxyribonuclease activity	9									0.519	1			0.855	1											1
GO:0000018	regulation of DNA recombination	7	1	1	1	1	1	1							1	1											61
GO:0006275	regulation of DNA replication	7			1	1	1	1	1	1			1	1			1	1			1	1	1	1			158
GO:0090329	regulation of DNA-dependent DNA replication	8							1	1																	35
GO:0006282	regulation of DNA repair	7	1	1							0.532	2			1	1					1	1	1	1			78
GO:0032423	regulation of mismatch repair	8									1	1			1	1											3
GO:2000819	regulation of nucleotide-excision repair	8									1	1			1	1											3
GO:2000779	regulation of double-strand break repair	8																			1	1	1	1			37
GO:2000278	regulation of DNA biosynthetic process	7																			1	1	1	1			69
GO:0051972	regulation of telomerase activity	8																			1	1	1	1			41
GO:0032204	regulation of telomere maintenance	7																			1	1	1	1			67
GO:1904356	regulation of telomere maintenance via telomere lengthening	8																			1	1	1	1			50
GO:0032210	regulation of telomere maintenance via telomerase	9																			1	1	1	1			45
GO:0051252	regulation of RNA metabolic process	6	3.92e-41	36	7.58e-28	25	2.92e-30	27	1.2e-26	24	3.04e-24	22	7.68e-22	20	7.1e-34	30	7.68e-22	20	7.58e-28	25	1.22e-20	19	1.09e-32	29	3.1e-18	17	3720
GO:1903311	regulation of mRNA metabolic process	7	0.00124	4	0.000229	4	0.0297	3	0.000187	4	0.014	3			0.000544	4	0.0098	3	1	2			0.037	3	0.587	2	114
GO:0050684	regulation of mRNA processing	8	0.000706	4	0.00013	4	0.0195	3	0.000106	4	0.00914	3			0.000308	4	0.00641	3	1	2			0.0243	3	0.443	2	99
GO:0031440	regulation of mRNA 3'-end processing	9			1	1																					28
GO:1900363	regulation of mRNA polyadenylation	10			1	1																					9
GO:2000628	regulation of miRNA metabolic process	7							1	1																	8
GO:0060700	regulation of ribonuclease activity	7																	1	1							6
GO:0060699	regulation of endoribonuclease activity	8																	1	1							3
GO:0043484	regulation of RNA splicing	7	0.0463	3	0.0127	3	0.0167	3	5.11e-07	5	5.59e-05	4			0.0247	3	0.00549	3	1	2			0.0208	3	0.00304	3	94
GO:0048024	regulation of mRNA splicing, via spliceosome	8	0.012	3	0.447	2	0.539	2	1.39e-05	4	0.00201	3			0.00637	3	0.00141	3	0.447	2			0.00536	3	0.163	2	60
GO:0000381	regulation of alternative mRNA splicing, via spliceosome	9	0.293	2	0.118	2	0.143	2	0.000371	3	0.0833	2			0.000844	3	0.000186	3	0.118	2			0.165	2	0.043	2	31
GO:2001141	regulation of RNA biosynthetic process	7	1.46e-41	36	3.83e-28	25	1.4e-30	27	6.24e-27	24	1.66e-24	22	4.44e-22	20	3.13e-34	30	4.44e-22	20	3.83e-28	25	7.27e-21	19	4.93e-33	29	1.95e-18	17	3620
GO:0052312	modulation of transcription in other organism involved in symbiotic interaction	8	0.000629	3					0.0575	2	1	1			1	1							0.09	2	1	1	23
GO:0052472	modulation by host of symbiont transcription	9	0.000547	3					0.0525	2	1	1			1	1							0.0822	2	1	1	22
GO:1903506	regulation of nucleic acid-templated transcription	8	1.21e-41	36	3.35e-28	25	1.21e-30	27	5.5e-27	24	1.48e-24	22	4e-22	20	2.67e-34	30	4e-22	20	3.35e-28	25	6.58e-21	19	4.23e-33	29	1.78e-18	17	3601
GO:0006355	regulation of transcription, DNA-templated	9	1.61e-36	34	1.65e-17	20	1.26e-23	24	3.42e-22	22	4.62e-22	21	1.68e-15	17	2.53e-29	28	1.15e-19	19	1.17e-25	24	7.29e-11	14	5.43e-26	26	5.65e-14	15	3581
GO:0045896	regulation of transcription during mitosis	10	1	1																			1	1			5
GO:0032784	regulation of DNA-templated transcription, elongation	10	2.86e-05	4	1	1	0.303	2	0.00117	3	0.177	2			0.4	2			1	1			1	1			45
GO:0006357	regulation of transcription from RNA polymerase II promoter	10	9.26e-31	27	2.43e-12	14	3.94e-22	20	4.82e-24	20	2.84e-15	15	3.34e-06	9	7.75e-19	19	1.13e-07	10	2.63e-21	19	4.9e-05	8	1.54e-17	18	2.33e-10	11	1821
GO:1901213	regulation of transcription from RNA polymerase II promoter involved in heart development	11											1	1									1	1			13
GO:1902893	regulation of pri-miRNA transcription from RNA polymerase II promoter	11	1	1																			1	1			12
GO:0046021	regulation of transcription from RNA polymerase II promoter, mitotic	11	1	1																			1	1			4
GO:0034243	regulation of transcription elongation from RNA polymerase II promoter	11	0.000816	3	1	1	0.0922	2	0.0682	2	0.0538	2			0.122	2			1	1			1	1			25
GO:0060850	regulation of transcription involved in cell fate commitment	11	1	1					1	1																	20
GO:0021882	regulation of transcription from RNA polymerase II promoter involved in forebrain neuron fate commitment	12	1	1					1	1																	3
GO:0006356	regulation of transcription from RNA polymerase I promoter	10	1	1			1	1			1	1							1	1			1	1			25
GO:1901836	regulation of transcription of nuclear large rRNA transcript from RNA polymerase I promoter	11	1	1																			1	1			9
GO:0051090	regulation of sequence-specific DNA binding transcription factor activity	10	1	1	1	1	1	1	0.642	3					1	1			0.749	3	1	1	1	3	1	1	372
GO:0043620	regulation of DNA-templated transcription in response to stress	10							1	1																	67
GO:0043618	regulation of transcription from RNA polymerase II promoter in response to stress	11							1	1																	62
GO:0061418	regulation of transcription from RNA polymerase II promoter in response to hypoxia	12							1	1																	33
GO:2000142	regulation of DNA-templated transcription, initiation	10	1	1					1	1	0.000294	3			1	1			1	1							32
GO:0060260	regulation of transcription initiation from RNA polymerase II promoter	11	1	1					1	1	0.00012	3			1	1			1	1							24
GO:0045898	regulation of RNA polymerase II transcriptional preinitiation complex assembly	12	1	1					1	1	2.7e-05	3			1	1			1	1							15
GO:0051174	regulation of phosphorus metabolic process	5	1	2			1	1			1	2			1	3			1	2	1	3	1	3	1	3	1758
GO:0019220	regulation of phosphate metabolic process	6	1	2			1	1			1	2			1	3			1	2	1	3	1	3	1	3	1745
GO:0006140	regulation of nucleotide metabolic process	7																			1	1					212
GO:1900542	regulation of purine nucleotide metabolic process	8																			1	1					206
GO:0030799	regulation of cyclic nucleotide metabolic process	8																			1	1					154
GO:0030814	regulation of cAMP metabolic process	9																			1	1					128
GO:0035303	regulation of dephosphorylation	7																					1	1			161
GO:0042325	regulation of phosphorylation	7	1	2			1	1			1	2			1	3			1	2	1	2	1	2	1	3	1506
GO:0043549	regulation of kinase activity	8	1	1							1	1			1	1			1	2	1	1			1	1	933
GO:0043550	regulation of lipid kinase activity	9	1	1							1	1			1	1			1	1	1	1			1	1	52
GO:1903725	regulation of phospholipid metabolic process	7	1	1							1	1			1	1			1	1	1	1			1	1	66
GO:0043551	regulation of phosphatidylinositol 3-kinase activity	8	1	1							1	1			1	1			1	1	1	1			1	1	44
GO:2000377	regulation of reactive oxygen species metabolic process	5							1	1																	159
GO:0010565	regulation of cellular ketone metabolic process	5																			1	1					204
GO:0072364	regulation of cellular ketone metabolic process by regulation of transcription from RNA polymerase II promoter	6																			1	1					9
GO:0032268	regulation of cellular protein metabolic process	5	1	6	1	4	1	3	1	3	1	4	1	3	1	6			1	3	1	5	0.217	7	1	3	2477
GO:0031399	regulation of protein modification process	6	1	6	1	2	1	2	1	2	1	4			1	5			1	3	0.255	5	1	5	1	3	1807
GO:1903320	regulation of protein modification by small protein conjugation or removal	7	1	1	1	1					1	1			1	1					0.141	3	1	1			297
GO:0031396	regulation of protein ubiquitination	8	1	1	1	1					1	1			1	1					0.116	3	1	1			278
GO:1902498	regulation of protein autoubiquitination	9	1	1																	1	1					3
GO:0051438	regulation of ubiquitin-protein transferase activity	9									1	1			1	1					1	1					139
GO:1904666	regulation of ubiquitin protein ligase activity	10													1	1											46
GO:0051439	regulation of ubiquitin-protein ligase activity involved in mitotic cell cycle	10													1	1											103
GO:1901983	regulation of protein acetylation	7	1	1															1	1			1	1			62
GO:2000756	regulation of peptidyl-lysine acetylation	8	1	1															1	1			1	1			54
GO:0090311	regulation of protein deacetylation	7							1	1											0.0727	2	1	1			35
GO:0090043	regulation of tubulin deacetylation	8							1	1																	6
GO:0001932	regulation of protein phosphorylation	7	1	2			1	1			1	2			1	3			1	2	1	2	1	2	1	3	1412
GO:0045859	regulation of protein kinase activity	8	1	1							1	1			1	1			1	2	1	1			1	1	881
GO:0071900	regulation of protein serine/threonine kinase activity	9	1	1							1	1			1	1			1	1	1	1			1	1	616
GO:0035304	regulation of protein dephosphorylation	7																					1	1			155
GO:0010921	regulation of phosphatase activity	8																					1	1			134
GO:0043666	regulation of phosphoprotein phosphatase activity	9																					1	1			63
GO:0031056	regulation of histone modification	7	0.122	3	1	2	1	1	1	1	1	1			1	1			1	1	1	1	0.0548	3			130
GO:0031063	regulation of histone deacetylation	8																			1	1	1	1			24
GO:0031060	regulation of histone methylation	8	0.012	3	0.447	2	1	1	1	1	1	1			1	1			1	1			1	1			60
GO:0051569	regulation of histone H3-K4 methylation	9	1	1					1	1	1	1							1	1			1	1			29
GO:0061085	regulation of histone H3-K27 methylation	9	1	1	1	1	1	1							1	1											9
GO:0033182	regulation of histone ubiquitination	8			1	1																					10
GO:2001166	regulation of histone H2B ubiquitination	9			1	1																					4
GO:0035065	regulation of histone acetylation	8	1	1															1	1			1	1			50
GO:0071440	regulation of histone H3-K14 acetylation	9																	1	1							6
GO:1901674	regulation of histone H3-K27 acetylation	9																	1	1							3
GO:2000615	regulation of histone H3-K9 acetylation	9																	1	1							9
GO:1903362	regulation of cellular protein catabolic process	6													1	1					1	1	1	1			278
GO:1903050	regulation of proteolysis involved in cellular protein catabolic process	7													1	1					1	1	1	1			258
GO:0061136	regulation of proteasomal protein catabolic process	8													1	1											195
GO:0032434	regulation of proteasomal ubiquitin-dependent protein catabolic process	9													1	1											163
GO:2000058	regulation of protein ubiquitination involved in ubiquitin-dependent protein catabolic process	8																			1	1	1	1			99
GO:0006417	regulation of translation	6			1	2							0.223	3					1	1	1	1	0.823	3			326
GO:2000765	regulation of cytoplasmic translation	7			1	1							1	1									1	1			13
GO:0006446	regulation of translational initiation	7																	1	1							83
GO:0043555	regulation of translation in response to stress	7																	1	1	1	1	1	1			22
GO:0043556	regulation of translation in response to oxidative stress	8																			0.413	1	0.773	1			1
GO:0043558	regulation of translational initiation in response to stress	8																	1	1							18
GO:0010998	regulation of translational initiation by eIF2 alpha phosphorylation	9																	1	1							12
GO:0060735	regulation of eIF2 alpha phosphorylation by dsRNA	10																	0.646	1							1
[truncated: 957 more rows]

## Sheet: E. SRSRSR-motif
NTR	Number of Proteins with SRSRSR Motif	Number of the 3rd-Z-4% Cargoes	Fraction	Gene Name (UniProt AC ) of Protein with SRSRSR Motif
Imp-β	1	64	0.015625	RBM27 (Q9P2N5)
Trn-1	2	49	0.0408163	ARL6IP4 (Q66PJ3), PNN (Q9H307)
Trn-2	2	50	0.04	ARL6IP4 (Q66PJ3), PNN (Q9H307)
Trn-SR	8	63	0.126984	SRSF1 (Q07955), SRSF2 (Q01130), SRSF3 (P84103), SRSF6 (Q13247), SRSF7 (Q16629), SRSF8 (Q9BRL6), SRRM2 (Q9UQ35), U2AF1 (Q01081)
Imp-4	1	50	0.02	BCLAF1 (Q9NYF8)
Imp-5	11	63	0.174603	ARL6IP4 (Q66PJ3), DDX46 (Q7L014), LUC7L (Q9NQ29), LUC7L2 (Q9Y383), RBM26 (Q5T8P6), RBM39 (Q14498), SRSF3 (P84103), SRSF7 (Q16629), SRSF8 (Q9BRL6), U2AF1 (Q01081), U2AF2 (P26368)
Imp-7	9	58	0.155172	ACIN1 (Q9UKV3), ARGLU1 (Q9NWB6), ARL6IP4 (Q66PJ3), LUC7L3 (O95232), RSRC2 (Q7L4I2), SRSF1 (Q07955), SRSF2 (Q01130), SRSF7 (Q16629), SRSF11 (Q05519)
Imp-8	7	60	0.116667	ACIN1 (Q9UKV3), LUC7L3 (O95232), SRSF3 (P84103), SRSF7 (Q16629), SRSF11 (Q05519), U2AF1 (Q01081), U2AF2 (P26368)
Imp-9	2	53	0.0377358	BCLAF1 (Q9NYF8), SRRM2 (Q9UQ35)
Imp-11	4	52	0.0769231	DDX46 (Q7L014), RBM39 (Q14498), U2AF1 (Q01081), U2AF2 (P26368)
Imp-13	4	66	0.0606061	SRSF2 (Q01130), SRSF3 (P84103), SRSF8 (Q9BRL6), RBM27 (Q9P2N5)
Exp-4	8	49	0.163265	ARGLU1 (Q9NWB6), ARL6IP4 (Q66PJ3), LUC7L2 (Q9Y383), RBM26 (Q5T8P6), RBM39 (Q14498), SRSF3 (P84103), U2AF1 (Q01081), ZNF638 (Q14966)
	Number of Proteins with SRSRSR Motif	Number in UniProt	Fraction in UniProt
Nuclear proteina	38	3108	0.0122265	ACIN1 (Q9UKV3), ARGLU1 (Q9NWB6), ARL6IP4 (Q66PJ3), BCLAF1 (Q9NYF8), CACTIN (Q8WUQ7), CCNL1 (Q9UK58), CCNL2 (Q96S94), CDK13 (Q14004), DDX23 (Q9BUQ8), DDX46 (Q7L014), DHX8 (Q14562), LUC7L3 (O95232), NKAP (Q8N5F7), NSMCE4A (Q9NXX6), PNISR (Q8TF01), PPARGC1A (Q9UBK2), PPIG (Q13427), PPRC1 (Q5VV67), SCAF8 (Q9UPN6), SON (P18583), SRSF1 (Q07955), SRSF2 (Q01130), SRSF3 (P84103), SRSF4 (Q08170), SRSF5 (Q1…
Non-nuclear proteinb	2	3420	0.000584795	SPAG8 (Q99932), CHERP (Q8IWX8)
a,bProtein annotated with nuclear localization (a) or localization to non-nuclear components only (b) (with experimental evidence).
