# Supplementary figures and images for: Extensive cargo identification reveals distinct biological roles of the 12 importin pathways
Source: eLife journal article supplement (doi:10.7554/elife.21184), 2017-01-24

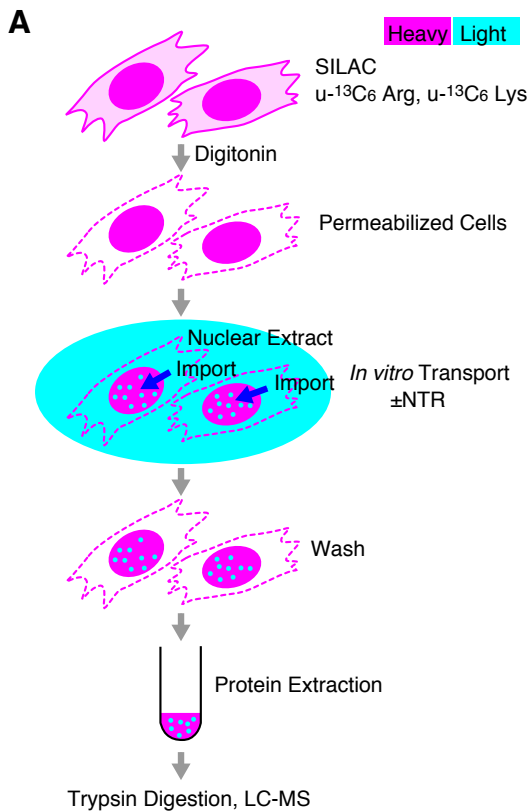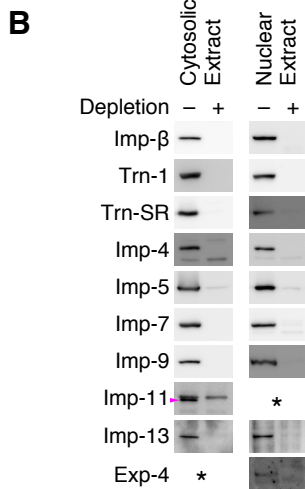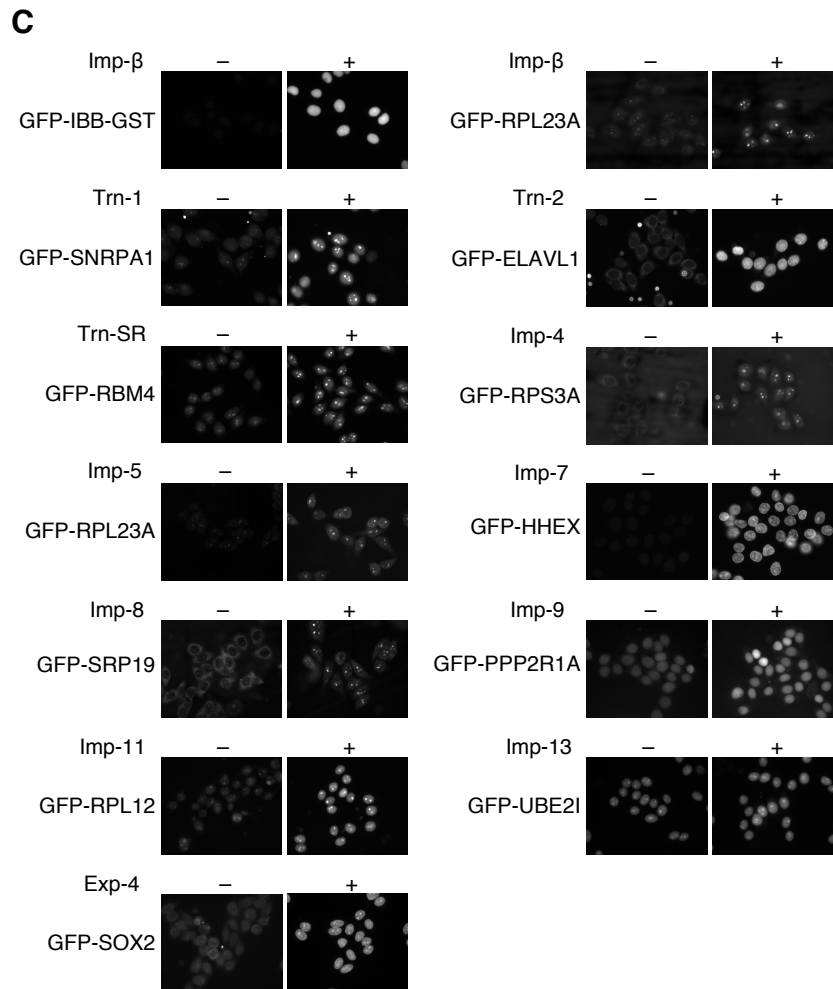

Supplement: supp [file elife_poa_e21184_Figure_1_figure_supplement_1.pdf › elife_poa_e21184_Figure_1_figure_supplement_1.pdf]

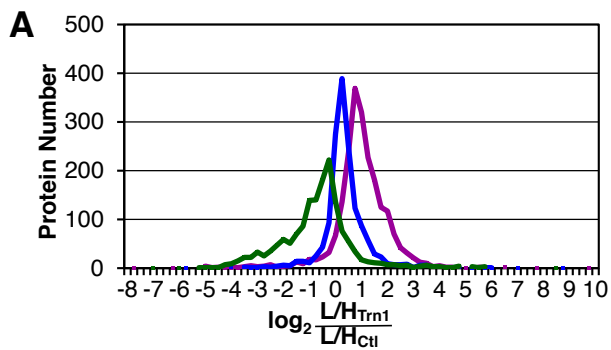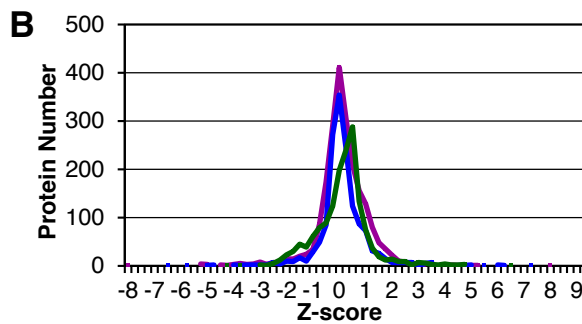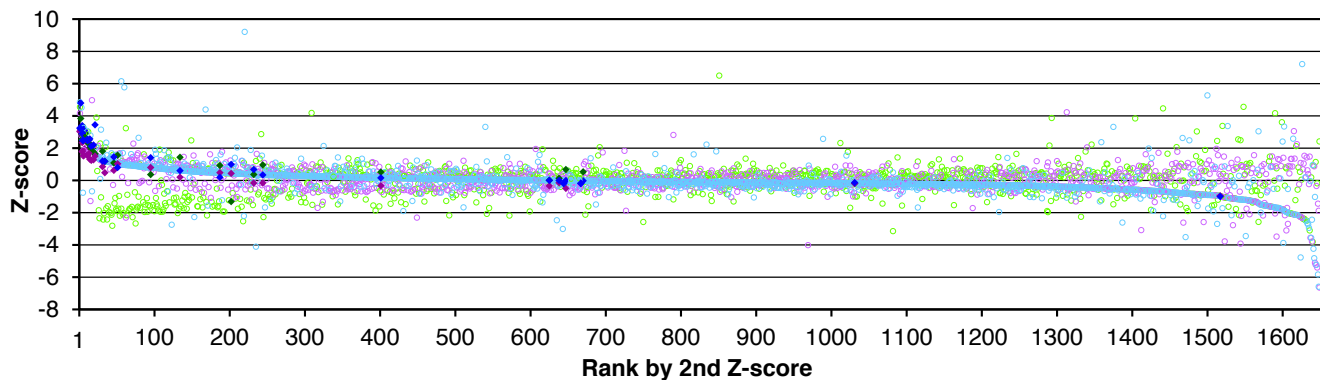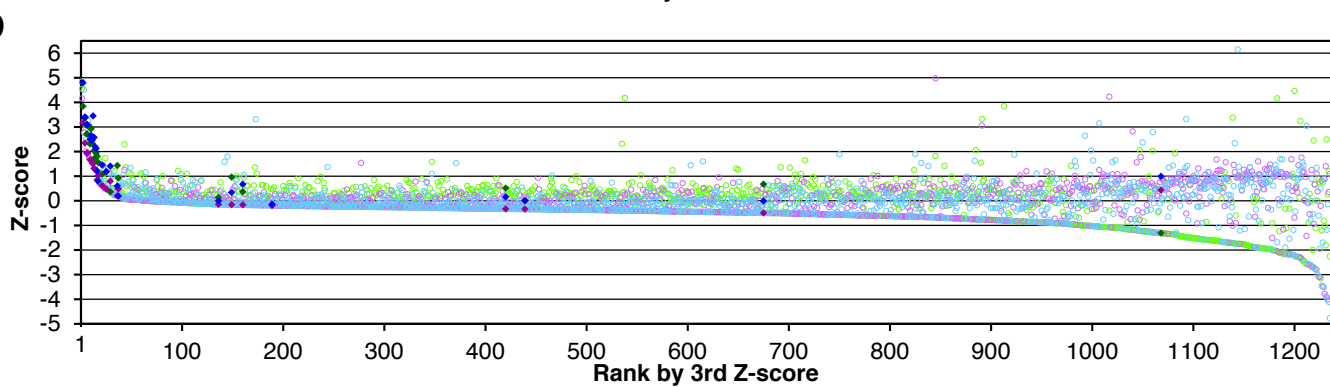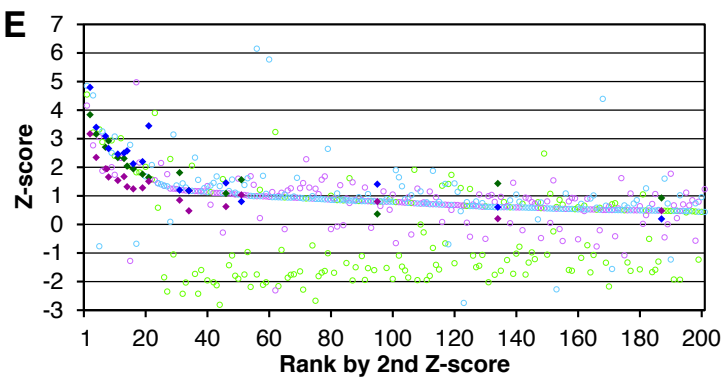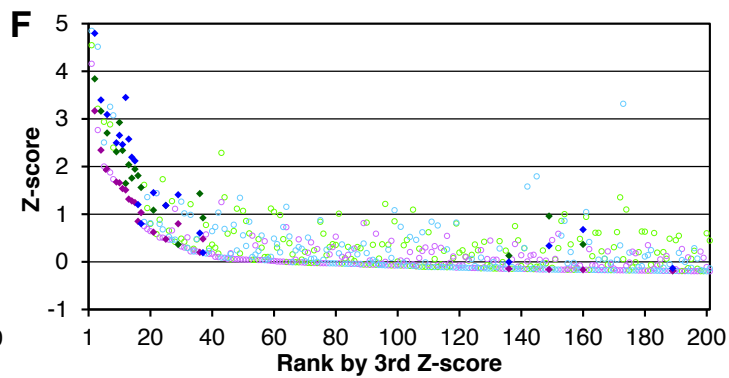

Supplement: supp [file elife_poa_e21184_Figure_1_figure_supplement_2.pdf › elife_poa_e21184_Figure_1_figure_supplement_2.pdf]

**A**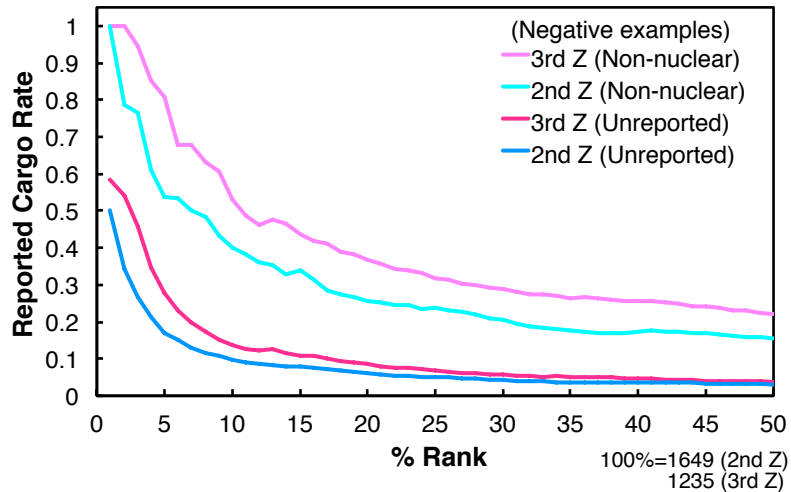**B**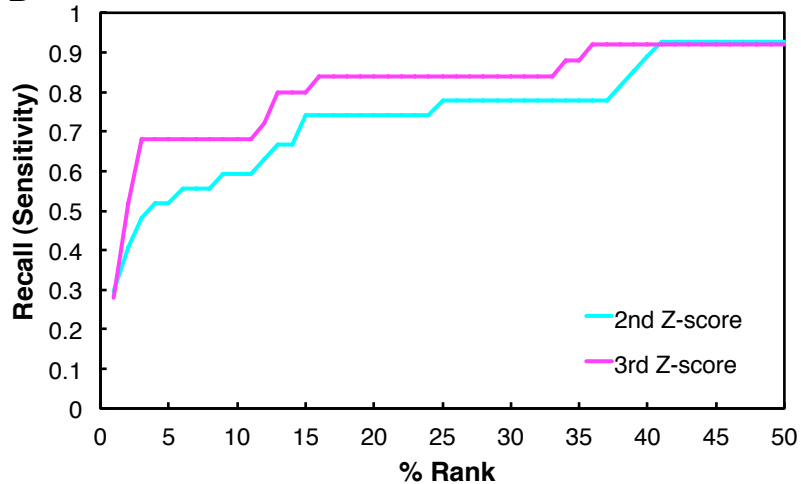

Supplement: supp [file elife_poa_e21184_Figure_1_figure_supplement_3.pdf › elife_poa_e21184_Figure_1_figure_supplement_3.pdf]

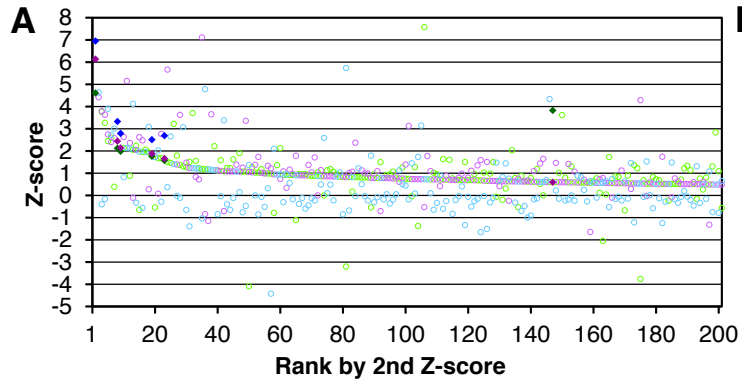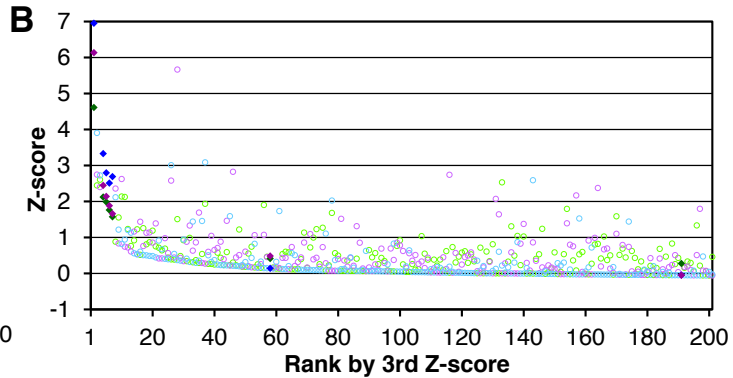

Supplement: supp [file elife_poa_e21184_Figure_2_figure_supplement_1.pdf › elife_poa_e21184_Figure_2_figure_supplement_1.pdf]

**A Imp-13**

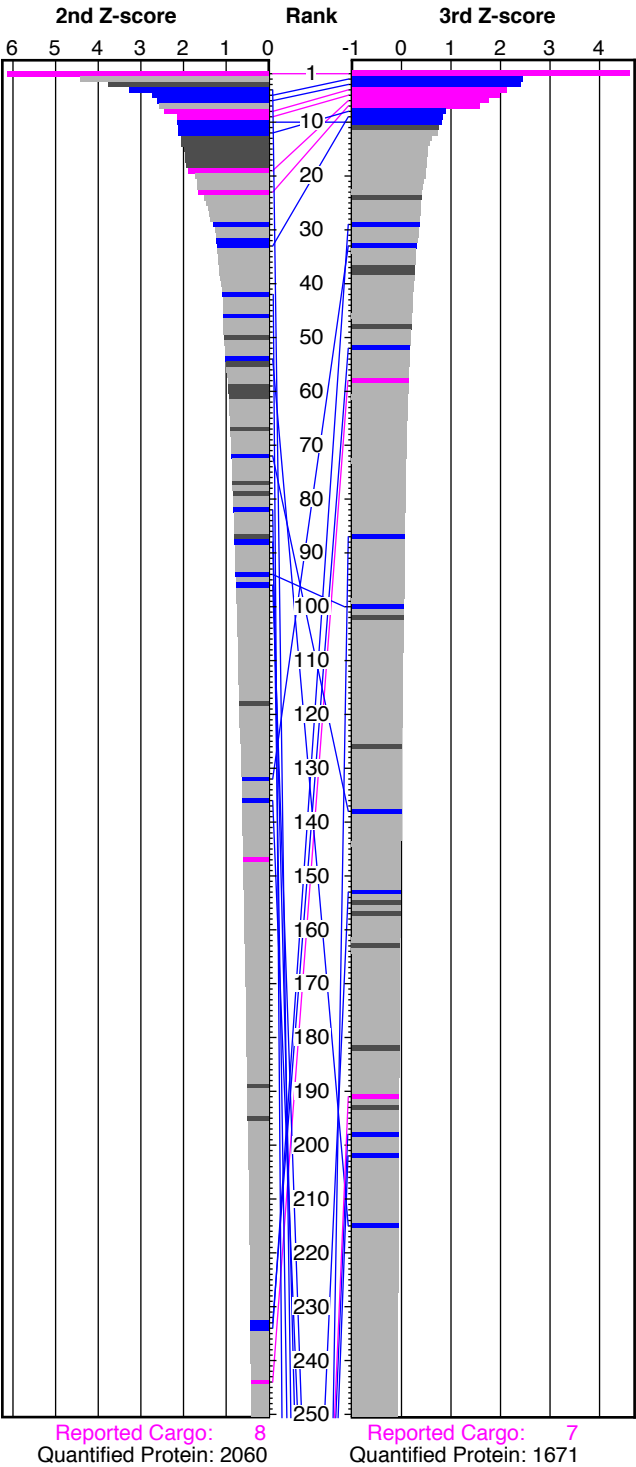

**B Trn-SR**

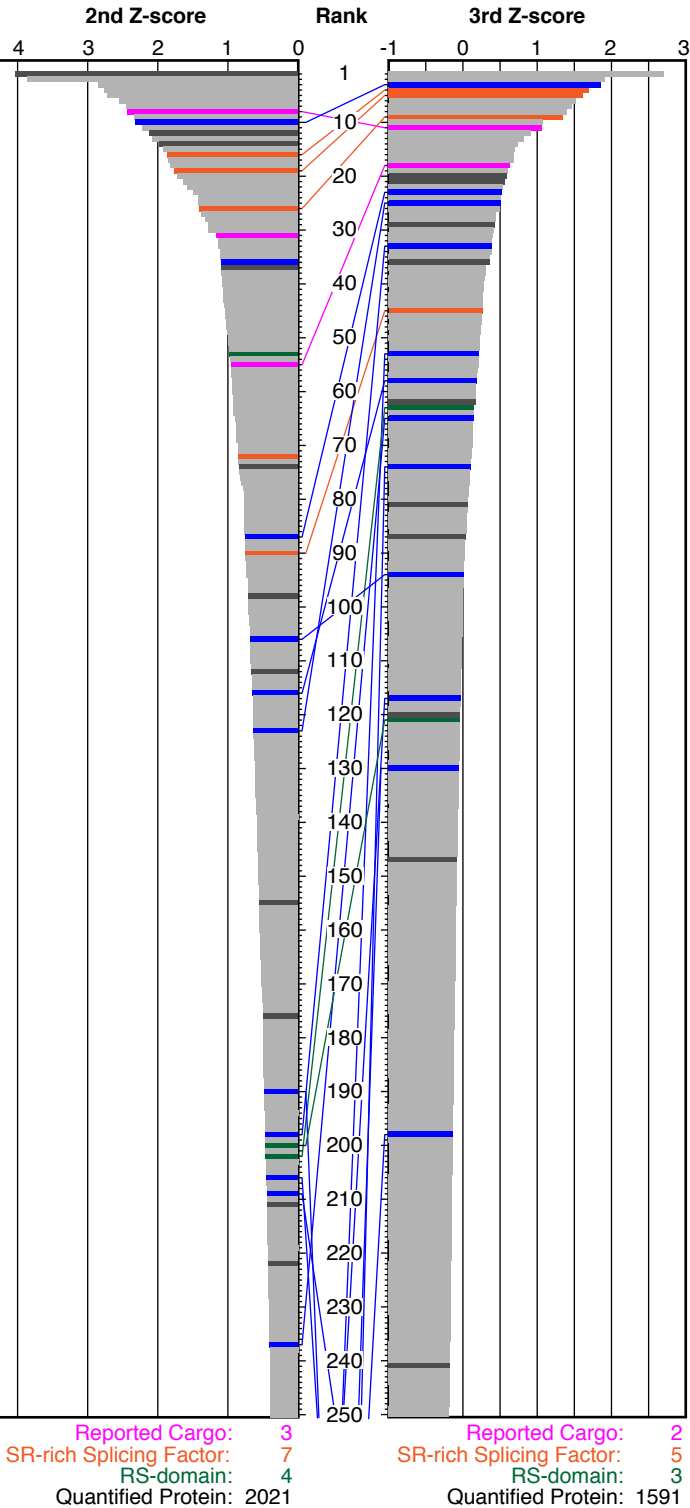

Direct Binding: Blue, Positive; Dark Gray, Negative; Gray, Not Determined

Supplement: supp [file elife_poa_e21184_Figure_2_figure_supplement_2.pdf › elife_poa_e21184_Figure_2_figure_supplement_2.pdf]

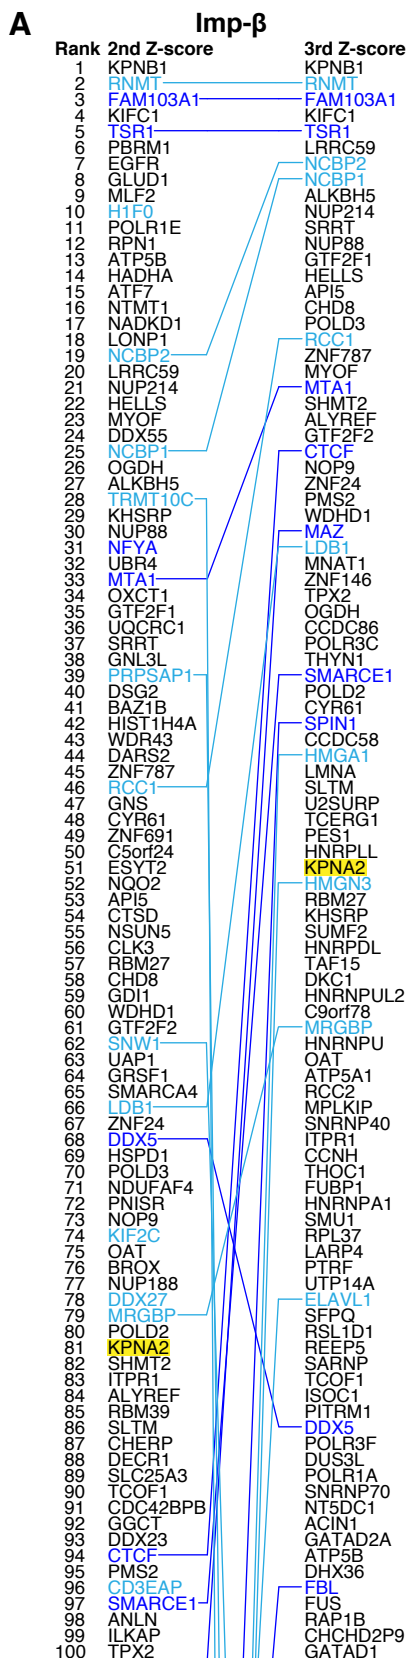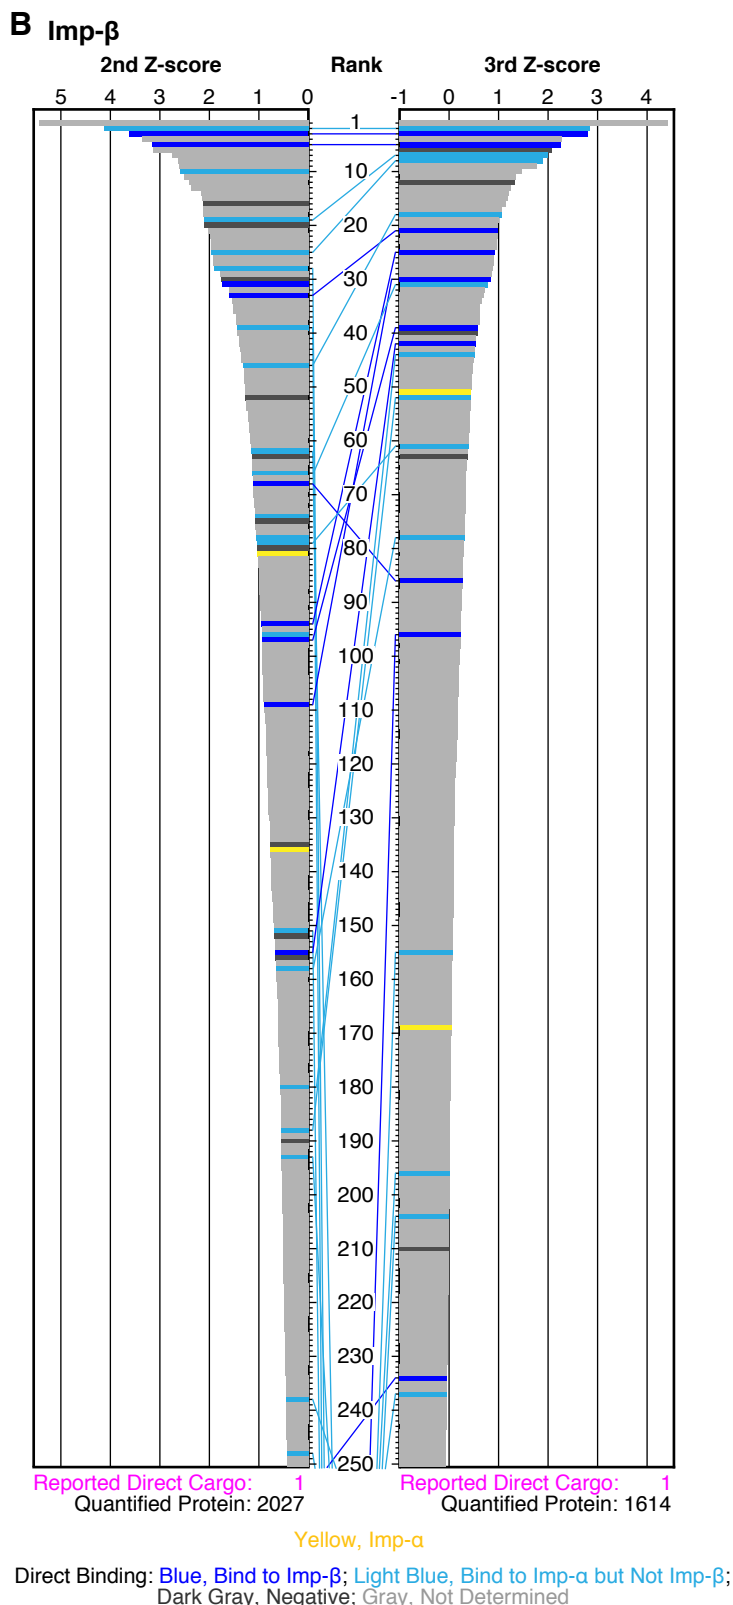

Supplement: supp [file elife_poa_e21184_Figure_2_figure_supplement_3.pdf › elife_poa_e21184_Figure_2_figure_supplement_3.pdf]
